# Supplementary material for: Combined Analysis of Expression Profiles in a Mouse Model and Patients Identified BHMT2 as a New Regulator of Lipid Metabolism in Metabolic-Associated Fatty Liver Disease
Source: Front Cell Dev Biol. 2021 Nov 11;9:741710. doi: 10.3389/fcell.2021.741710 (PMC8636031; doi:10.3389/fcell.2021.741710)
Supplement: Supplementary file 1 [file Table2.XLSX]

## Sheet: Supplemental table 4
Table S2.RNAseq data of liver tissues of MAFLD patients and controls
Gene_ID	Symbol	description	patient-1	patient-2	patient-3	patient-4	patient-5	patient-6	patient-7	Control-1	Control-2	Control-3	Control-4	Control-5	Control-6	Control-7	Control-8	Control-9	Average of Patients(G1)	Average of Controls (G2)	G2_vs_G1_log2FoldChange	G2_vs_G1_Pvalue	Symbol	description
ENSG00000135220	UGT2A3	UDP glucuronosyltransferase family 2 member A3	11.295	11.2427	11.5066	9.6459	10.4652	11.3847	10.6193	8.17983	9.20806	8.60369	10.2017	8.6589	7.40451	8.11374	9.93569	9.37702	10.8799	8.85368	-2.02623	9.92e-08	UGT2A3	UDP glucuronosyltransferase family 2 member A3
ENSG00000273888	FRMD6-AS1	FRMD6 antisense RNA 1	0	0	0	0	1.67975	0	0	3.07208	3.61312	3.64438	2.6735	2.86788	3.55899	2	2.96489	1.73532	0.239965	2.90335	2.66339	5.74e-07	FRMD6-AS1	FRMD6 antisense RNA 1
ENSG00000165682	CLEC1B	C-type lectin domain family 1 member B	9.22982	10.2758	10.2057	11.6078	9.34918	10.3873	10.1348	8.04467	8.78551	8.24936	9.72517	9.33704	8.10222	7.87652	8.71478	6.87622	10.1701	8.41239	-1.75767	2.04e-06	CLEC1B	C-type lectin domain family 1 member B
ENSG00000142197	DOPEY2	dopey family member 2	10.6546	9.32564	9.45512	8.76513	9.42051	9.46623	9.2697	8.47846	8.95841	8.29331	8.95401	8.28445	8.2313	8.17991	7.61106	7.94699	9.47956	8.32643	-1.15312	2.1e-06	DOPEY2	dopey family member 2
ENSG00000173156	RHOD	ras homolog family member D	9.48886	9.34107	10.0615	9.03501	9.8506	9.23658	10.084	11.2371	10.183	10.2778	9.87675	10.7621	11.2014	11.7432	10.8248	10.5429	9.58537	10.7388	1.15339	2.11e-06	RHOD	ras homolog family member D
ENSG00000154080	CHST9	carbohydrate sulfotransferase 9	9.67285	9.88287	9.75238	8.18478	8.95664	8.87849	7.83996	6.51996	7.65259	6.45627	6.86146	6.7279	6.39177	5.52356	7.77377	8.87774	9.024	6.97611	-2.04788	3.56e-06	CHST9	carbohydrate sulfotransferase 9
ENSG00000248383	PCDHAC1	protocadherin alpha subfamily C, 1	3.89193	3.99569	3.22575	6.2343	3.44848	4.61731	4.10576	1.91789	2.02308	3.38029	2.2758	2.37849	2.11061	2.58496	1.96996	0	4.21703	2.07123	-2.1458	3.74e-06	PCDHAC1	protocadherin alpha subfamily C, 1
ENSG00000134042	MRO	maestro	9.74309	6.928	9.10966	9.60834	7.50546	8.27981	7.08897	7.74792	5.9844	6.72229	6.5065	7.63225	5.98245	6.26679	6.4197	7.306	8.32333	6.72981	-1.59352	7.08e-06	MRO	maestro
ENSG00000169252	ADRB2	adrenoceptor beta 2	6.67227	7.26654	7.07341	6.89652	7.03365	6.90641	6.78391	9.07947	7.35243	7.48219	7.44864	8.21987	8.4387	9.02237	7.78653	7.51335	6.94753	8.03817	1.09064	7.53e-06	ADRB2	adrenoceptor beta 2
ENSG00000276019	HULC	Highly up-regulated in liver cancer conserved region	10.8814	11.1509	10.3936	9.48764	10.3554	9.72259	9.08961	6.97775	7.37923	8.40436	8.77829	8.83508	9.32347	7.04439	7.66044	9.84366	10.1544	8.24963	-1.90482	1.17e-05	HULC	Highly up-regulated in liver cancer conserved region
ENSG00000251164	HULC	hepatocellular carcinoma up-regulated long non-coding RNA	9.93655	10.3578	9.57586	7.85185	9.3246	8.86705	8.2821	6.02037	6.37017	7.76484	8.08085	8.21478	8.1868	6	6.84279	8.67066	9.17083	7.35014	-1.82069	2.35e-05	HULC	hepatocellular carcinoma up-regulated long non-coding RNA
ENSG00000099284	H2AFY2	H2A histone family member Y2	8.82339	8.585	8.39686	8.04999	7.03365	7.39479	6.74081	6.44525	6.37017	6.76453	6.86146	7.41867	5.82245	6.6865	7.05813	7.01261	7.86064	6.71553	-1.14511	2.89e-05	H2AFY2	H2A histone family member Y2
ENSG00000262003	AC087392.1	---	4.5229	2.48561	2.49613	3.02857	4.59331	2.84716	3.42361	5.44648	7.20041	6.81901	5.87381	4.15378	2.36413	5.90689	4.28377	6.77245	3.34247	5.42452	2.08205	3.06e-05	AC087392.1	---
ENSG00000152779	SLC16A12	solute carrier family 16 member 12	6.60143	7.88744	2.90658	4.70377	2.43495	3.98823	2.90435	2.90374	3.48736	2.63908	1.72491	2.37849	3.55899	0	2.28986	3.52141	4.48954	2.50043	-1.98911	3.24e-05	SLC16A12	solute carrier family 16 member 12
ENSG00000243135	UGT1A3	UDP glucuronosyltransferase family 1 member A3	12.807	7.90831	7.48576	12.6608	6.36699	7.18965	7.59576	7.88425	7.74479	6.69342	7.46128	7.06983	7.19175	7.5157	7.42764	7.77354	8.85918	7.41802	-1.44116	3.25e-05	UGT1A3	UDP glucuronosyltransferase family 1 member A3
ENSG00000135750	KCNK1	potassium two pore domain channel subfamily K member 1	7.40587	6.26513	7.58675	7.97499	8.23749	6.861	8.22068	9.30324	8.13387	9.21688	7.91159	9.85982	9.94277	10.8765	8.02065	7.84105	7.50742	9.01182	1.5044	3.62e-05	KCNK1	potassium two pore domain channel subfamily K member 1
ENSG00000274021	AC024909.3	---	2.34259	2.48561	3.98673	5.05399	2.70251	2.23802	3.09895	5.44648	6.15954	6.75059	4.6337	6.33626	6.22577	6.24793	2.96489	3.78789	3.12977	5.39478	2.26501	3.64e-05	AC024909.3	---
ENSG00000139926	FRMD6	FERM domain containing 6	7.39195	7.85197	8.23737	7.6545	8.44787	8.49824	8.46094	8.41332	8.83798	9.2886	8.86645	9.30627	8.66493	8.94837	9.19349	8.62031	8.07755	8.90441	0.826864	3.67e-05	FRMD6	FERM domain containing 6
ENSG00000136237	RAPGEF5	Rap guanine nucleotide exchange factor 5	10.0671	9.64453	9.66435	10.5688	10.144	9.53291	9.87895	9.30957	8.51442	9.57043	9.50634	8.62093	8.28984	9.47776	8.45577	8.85615	9.92868	8.95569	-0.97299	3.74e-05	RAPGEF5	Rap guanine nucleotide exchange factor 5
ENSG00000131791	PRKAB2	protein kinase AMP-activated non-catalytic subunit beta 2	12.1333	11.7356	10.2798	9.46406	10.2339	11.1834	10.2249	9.73976	9.61185	9.72462	10.2498	9.28942	8.52572	9.35975	9.68947	10.1162	10.7507	9.58962	-1.16109	4.03e-05	PRKAB2	protein kinase AMP-activated non-catalytic subunit beta 2
ENSG00000197062	ZSCAN26	zinc finger and SCAN domain containing 26	8.95232	7.97578	7.66802	8.55118	7.68613	8.1847	8.14556	7.49736	7.42283	7.40416	7.98782	7.11424	7.33948	7	7.30878	7.2519	8.16624	7.36962	-0.796623	4.84e-05	ZSCAN26	zinc finger and SCAN domain containing 26
ENSG00000137947	GTF2B	general transcription factor IIB	9.56064	9.69345	9.57761	9.53714	9.31464	9.49872	9.40239	9.96503	10.0419	10.2093	9.59216	9.98618	10.1371	10.446	9.83636	9.77818	9.51208	9.99913	0.48705	5.17e-05	GTF2B	general transcription factor IIB
ENSG00000257524	AL157935.2	---	4.47087	4.83816	4.29034	4.49058	4.5259	4.61731	6.87974	7.58349	7.56969	7.90992	6.65692	6.96461	7.53286	6.93074	4.81919	5.30148	4.87327	6.80765	1.93438	5.29e-05	AL157935.2	---
ENSG00000135218	CD36	CD36 molecule	9.83729	11.573	11.4445	13.0766	11.1904	12.0919	11.6805	7.77257	10.4538	10.7841	10.5015	10.4201	9.54635	7.77479	10.7453	8.57256	11.5563	9.61901	-1.9373	5.6e-05	CD36	CD36 molecule
ENSG00000125962	ARMCX5	armadillo repeat containing, X-linked 5	5.85822	6.82931	6.95965	6.07104	6.76796	6.66352	8.20491	7.51208	9.07229	6.72229	8.35929	8.6849	8.48954	9.41363	8.2314	7.69462	6.76494	8.24223	1.47728	5.81e-05	ARMCX5	armadillo repeat containing, X-linked 5
ENSG00000166435	XRRA1	X-ray radiation resistance associated 1	9.60356	9.53919	8.87309	8.39116	9.06152	8.83609	9.45446	8.49707	7.23016	7.5642	8.13707	8.32281	8.62	8.85487	7.97119	8.03931	9.10844	8.13741	-0.97103	5.82e-05	XRRA1	X-ray radiation resistance associated 1
ENSG00000148344	PTGES	prostaglandin E synthase	3.05829	2.98205	3.60171	4.75249	4.83525	4.29186	3.80463	4.28722	4.27702	5.34848	6.58944	5.79699	7.20803	7.53916	5.93773	3.78789	3.90375	5.64133	1.73757	6.76e-05	PTGES	prostaglandin E synthase
ENSG00000149646	CNBD2	cyclic nucleotide binding domain containing 2	1.39443	2.48561	1.9203	2.45286	2.92812	0	0	3.5987	6.33409	4.06074	3.11858	2.05309	2.9331	4.64386	4.48514	4.37858	1.59733	3.95621	2.35887	7.06e-05	CNBD2	cyclic nucleotide binding domain containing 2
ENSG00000279108	AC008537.3	---	6.94444	8.00837	3.98673	4.01926	3.12318	5.88852	3.91215	3.48395	4.48874	4.23111	3.81405	3.06176	3.34007	2	1.96996	4.45718	5.12609	3.42742	-1.69867	8.08e-05	AC008537.3	---
ENSG00000280734	LINC01232	long intergenic non-protein coding RNA 1232	7.47355	8.58067	7.31964	5.90858	7.17235	7.13982	6.72615	6.21281	5.64478	5.5227	6.57788	6.7279	5.46413	5.93074	5.84314	6.55736	7.18868	6.05349	-1.13519	0.000100838	LINC01232	long intergenic non-protein coding RNA 1232
ENSG00000189298	ZKSCAN3	zinc finger with KRAB and SCAN domains 3	6.93486	7.31944	7.33631	7.17193	7.52286	7.40537	6.98199	6.51996	6.15954	6.29268	7.20741	6.29827	5.43676	6.18982	6.71507	6.04934	7.23897	6.31876	-0.920206	0.00010765	ZKSCAN3	zinc finger with KRAB and SCAN domains 3
ENSG00000172478	C2orf54	chromosome 2 open reading frame 54	7.26019	0	6.23395	5.70086	6.97167	7.24962	4.35477	4.28722	4.19893	4.14844	2.83759	5.23838	4.26701	3	3.66337	2.16809	5.39587	3.75656	-1.6393	0.000108459	C2orf54	chromosome 2 open reading frame 54
ENSG00000171747	LGALS4	galectin 4	10.9975	8.72098	9.21933	10.3508	10.3638	12.7059	8.75613	8.23409	9.30909	8.10338	9.27177	9.05892	7.94109	10.1523	8.77367	8.70731	10.1592	8.83907	-1.32015	0.000109752	LGALS4	galectin 4
ENSG00000156113	KCNMA1	potassium calcium-activated channel subfamily M alpha 1	9.93535	8.75978	7.92106	8.83182	6.38612	9.36955	8.14004	7.26518	7.76526	6.52342	8.39266	6.40937	6.19343	7.50779	7.30878	6.64392	8.47767	7.1122	-1.36547	0.000121861	KCNMA1	potassium calcium-activated channel subfamily M alpha 1
ENSG00000135111	TBX3	T-box 3	9.97325	10.4075	10.0195	9.4289	10.094	9.46876	9.94532	11.0278	10.8941	10.8526	10.8219	10.5359	9.61512	11.4594	10.2885	10.887	9.90532	10.7091	0.803818	0.000125086	TBX3	T-box 3
ENSG00000232310	AL078590.3	---	3.81053	3.3507	4.06883	4.43196	3.5872	4.75609	3.91215	0	2.61058	0	3.11858	2.37849	2.76719	2.32193	3.13425	2.16809	3.98821	2.05546	-1.93275	0.000125174	AL078590.3	---
ENSG00000130222	GADD45G	growth arrest and DNA damage inducible gamma	6.87606	7.43901	6.49379	8.63151	8.96938	6.99317	7.62766	9.38146	7.93143	9.04757	8.43813	8.81504	10.1686	10.4888	8.19834	9.87621	7.5758	9.14951	1.57372	0.000129198	GADD45G	growth arrest and DNA damage inducible gamma
ENSG00000166199	ALKBH3	alkB homolog 3, alpha-ketoglutaratedependent dioxygenase	7.88986	7.46742	7.63472	8.01048	8.49709	7.9446	8.24144	8.94223	8.83798	8.87834	8.80084	8.9375	8.09348	9.09276	8.29532	8.21924	7.95509	8.67752	0.722433	0.000131664	ALKBH3	alkB homolog 3, alpha-ketoglutaratedependent dioxygenase
ENSG00000187017	ESPN	espin	9.9087	9.18733	9.12893	7.92274	9.46167	9.67964	9.22088	7.42145	7.95538	7.33108	9.03233	8.72841	8.05799	8.26679	8.31307	8.57256	9.2157	8.18656	-1.02914	0.000158799	ESPN	espin
ENSG00000110841	PPFIBP1	PPFIA binding protein 1	10.3012	10.3666	10.4778	10.6745	10.2206	10.4791	10.4013	9.13043	9.80874	9.9195	10.4213	9.88887	9.56701	9.13186	9.26136	8.58574	10.4173	9.52387	-0.893431	0.000161804	PPFIBP1	PPFIA binding protein 1
ENSG00000280710	AL139035.1	---	2.90985	4.83816	1.51434	2.19535	3.5872	3.07639	0	0.945781	0	0	1.72491	0	0	0	0	0	2.58876	0.296744	-2.29201	0.000164559	AL139035.1	---
ENSG00000115457	IGFBP2	insulin like growth factor binding protein 2	10.9012	11.2102	10.054	10.5697	11.8264	10.8885	11.2072	11.8891	11.8852	10.9625	11.947	11.7024	12.4305	14.0364	12.1934	12.1022	10.951	12.1276	1.17661	0.000177163	IGFBP2	insulin like growth factor binding protein 2
ENSG00000182612	TSPAN10	tetraspanin 10	5.46482	4.94975	4.48232	3.7581	4.71934	2.57451	4.63139	0	2.8337	2.63908	4.33724	2.05309	1.80284	2	1.96996	2.16809	4.3686	2.20044	-2.16816	0.000181929	TSPAN10	tetraspanin 10
ENSG00000006715	VPS41	VPS41, HOPS complex subunit	10.3086	10.4825	10.2091	10.0904	10.0255	10.4576	10.317	10.0557	9.35257	9.66081	10.1113	9.90792	9.68803	8.9571	9.57088	9.55287	10.2701	9.6508	-0.619301	0.000187952	VPS41	VPS41, HOPS complex subunit
ENSG00000140157	NIPA2	non imprinted in Prader-Willi/Angelman syndrome 2	8.7434	9.42795	9.84267	9.34005	9.82804	9.48132	9.68226	10.5795	10.3033	9.72818	10.1645	10.1444	10.154	10.0688	9.92563	9.92542	9.47795	10.1104	0.632457	0.000189128	NIPA2	non imprinted in Prader-Willi/Angelman syndrome 2
ENSG00000181036	FCRL6	Fc receptor like 6	3.6325	4.2782	4.8962	7.69868	5.38436	4.75609	9.25701	0	4.55293	4.58551	4.28131	4.23647	4.64736	3	5.57534	2.77058	5.70043	3.73883	-1.9616	0.000192578	FCRL6	Fc receptor like 6
ENSG00000278918	AC080112.4	---	3.81053	2.15398	1.9203	3.3147	3.93775	3.27414	3.27039	6.83289	5.27782	4.64703	4.16251	4.15378	4.38629	4.85798	4.28377	4.45718	3.0974	4.78436	1.68696	0.000201441	AC080112.4	---
ENSG00000079950	STX7	syntaxin 7	10.2768	10.0828	10.3522	10.6753	10.365	10.2575	10.4321	10.057	9.95547	9.64958	10.0891	9.87765	9.90955	9.66534	10.0138	10.1856	10.3488	9.93367	-0.415148	0.000201621	STX7	syntaxin 7
ENSG00000163449	TMEM169	transmembrane protein 169	6.32192	6.15301	6.63524	5.6244	5.78114	6.32745	5.78285	3.89661	5.31532	4.64703	5.85478	5.35401	3.74903	3.16993	4.96108	4.79647	6.08943	4.63825	-1.45118	0.000215769	TMEM169	transmembrane protein 169
ENSG00000196141	SPATS2L	spermatogenesis associated serine rich 2 like	11.8591	11.8484	11.1508	11.0031	11.0941	11.5684	10.75	10.3874	10.8055	10.597	10.8139	9.97418	10.4041	10.2773	11.2083	10.7907	11.3248	10.5843	-0.740554	0.000216838	SPATS2L	spermatogenesis associated serine rich 2 like
ENSG00000237054	PRMT5-AS1	PRMT5 antisense RNA 1	3.19287	0	0	1.48027	2.70251	1.7984	2.08522	3.48395	4.3511	3.05677	3.55575	2.86788	4.26701	4	4.28377	3.1943	1.60847	3.67339	2.06493	0.000221178	PRMT5-AS1	PRMT5 antisense RNA 1
ENSG00000196208	GREB1	growth regulation by estrogen in breast cancer 1	9.02855	7.6684	6.4175	5.72548	5.45854	8.30263	4.10576	5.21424	4.55293	4.76271	6.5065	4.38886	2.9331	4.52356	6.24573	5.8598	6.67241	4.9986	-1.67381	0.000229853	GREB1	growth regulation by estrogen in breast cancer 1
ENSG00000147872	PLIN2	perilipin 2	14.6487	14.0682	13.2763	12.5463	13.3284	11.825	14.5307	12.7251	11.6991	12.954	11.6623	12.8837	12.9897	12.2201	12.0578	12.154	13.4605	12.3718	-1.08873	0.000241612	PLIN2	perilipin 2
ENSG00000213930	GALT	galactose-1-phosphate uridylyltransferase	10.1839	9.88988	9.63769	9.08342	9.60124	9.84816	9.55118	7.74792	8.59667	8.75455	9.37557	9.12823	8.57677	8.51175	9.21017	9.43886	9.68506	8.81561	-0.869453	0.000243196	GALT	galactose-1-phosphate uridylyltransferase
ENSG00000135838	NPL	N-acetylneuraminate pyruvate lyase	9.04866	9.02481	9.65939	10.3899	9.69819	9.88076	9.53445	9.19796	9.09941	8.11431	9.23912	9.10366	8.81333	8.61471	8.78644	7.97398	9.60516	8.77144	-0.833724	0.000244643	NPL	N-acetylneuraminate pyruvate lyase
ENSG00000150893	FREM2	FRAS1 related extracellular matrix protein 2	9.01271	7.78584	9.17136	7.95952	7.11617	10.1902	6.68126	5.86855	6.87592	5.31096	6.81298	6.39144	6.74415	7.53138	8.34794	7.40846	8.27386	6.8102	-1.46367	0.00027869	FREM2	FRAS1 related extracellular matrix protein 2
ENSG00000181827	RFX7	regulatory factor X7	7.60005	8.25643	8.89576	9.01269	8.12811	9.47128	8.47854	8.13775	8.12334	6.72229	7.43589	6.52902	6.46135	6.52356	8.35224	7.07625	8.54898	7.26241	-1.28657	0.000283551	RFX7	regulatory factor X7
ENSG00000131759	RARA	retinoic acid receptor alpha	8.56565	9.31526	8.90696	8.58855	9.1565	8.94167	8.57577	10.1703	9.50233	9.56247	9.93227	9.59775	8.91105	10.5878	9.04469	9.33601	8.86434	9.62718	0.762847	0.000297555	RARA	retinoic acid receptor alpha
ENSG00000242515	UGT1A10	UDP glucuronosyltransferase family 1 member A10	3.89193	5.36654	0.947361	0.922201	0	0	5.63375	0.945781	1.01543	0	0	1.03561	0.871594	1	0	1.11421	2.39454	0.664736	-1.7298	0.000321814	UGT1A10	UDP glucuronosyltransferase family 1 member A10
ENSG00000092068	SLC7A8	solute carrier family 7 member 8	7.89973	8.28331	9.48159	10.0125	8.18384	8.30828	8.50883	8.08459	7.76526	6.60318	8.44132	7.90927	6.55343	6.49185	7.97119	6.90455	8.6683	7.41385	-1.25445	0.000327294	SLC7A8	solute carrier family 7 member 8
ENSG00000262558	AC129507.3	---	5.46482	0	1.9203	0.922201	0	0	0	3.70498	3.19724	2.37392	2.6735	2.05309	2.9331	2	3.42294	4.01274	1.18676	2.93017	1.74341	0.000329391	AC129507.3	---
ENSG00000112096	SOD2	superoxide dismutase 2	11.6454	11.5795	12.1398	10.7035	13.3994	12.5172	13.1299	14.499	13.8407	13.5878	12.3714	13.9094	14.4954	14.9907	13.2602	11.8791	12.1592	13.6482	1.48893	0.000345369	SOD2	superoxide dismutase 2
ENSG00000174827	PDZK1	PDZ domain containing 1	12.2479	11.86	11.13	9.61988	10.4719	11.1069	11.0171	7.56243	10.1128	9.22698	10.6627	9.67019	9.76983	8.23362	10.3272	10.5763	11.0648	9.57135	-1.49346	0.000351171	PDZK1	PDZ domain containing 1
ENSG00000272279	AL512329.2	---	2.34259	2.75508	3.22575	1.48027	2.10621	3.44802	0	0	0	0	0	0	0	0	1.55829	0	2.19399	0.173143	-2.02085	0.000356066	AL512329.2	---
ENSG00000153234	NR4A2	nuclear receptor subfamily 4 group A member 2	5.9749	5.75243	6.90482	6.8525	6.61418	5.51128	6.81195	9.04446	6.25911	5.31096	6.28269	8.41888	8.26282	9.79442	8.98225	6.04934	6.34601	7.60055	1.25454	0.00038248	NR4A2	nuclear receptor subfamily 4 group A member 2
ENSG00000109758	HGFAC	HGF activator	10.5729	11.2165	9.73677	10.7341	9.71153	9.99903	10.0535	8.99294	9.45271	9.98499	9.37557	8.93441	9.03488	9.68475	9.84402	9.97802	10.2892	9.47581	-0.813371	0.00038581	HGFAC	HGF activator
ENSG00000065534	MYLK	myosin light chain kinase	12.4577	12.3314	11.2721	12.1732	11.4714	12.0898	11.4169	10.9126	11.4496	10.9443	11.8841	10.9174	10.3908	9.97871	10.6792	11.3167	11.8875	10.9415	-0.946026	0.000404742	MYLK	myosin light chain kinase
ENSG00000075240	GRAMD4	GRAM domain containing 4	9.74583	9.83824	9.82062	9.81311	10.2678	9.34501	11.2837	13.9866	9.22293	11.2264	10.1053	13.0195	13.2285	14.5979	9.49513	9.75309	10.0163	11.6262	1.60982	0.000420242	GRAMD4	GRAM domain containing 4
ENSG00000107518	ATRNL1	attractin like 1	6.10008	6.70758	7.66142	7.46288	6.30802	7.04823	5.75424	4.53789	5.23933	6.66396	6.33856	5.6539	4.64736	4.45943	5.48425	5.34347	6.72035	5.37424	-1.34611	0.00043483	ATRNL1	attractin like 1
ENSG00000102575	ACP5	acid phosphatase 5, tartrate resistant	9.09666	9.79594	9.07283	10.7529	9.07337	9.55447	8.75252	7.38992	9.45061	8.18342	9.24095	8.24506	7.82975	7.43463	8.39871	8.1965	9.44268	8.26328	-1.17939	0.000442619	ACP5	acid phosphatase 5, tartrate resistant
ENSG00000136842	TMOD1	tropomodulin 1	10.1114	8.71704	8.3235	10.2335	9.79263	9.24249	10.1852	11.3199	9.63983	10.4719	10.6197	11.2182	12.0602	12.4719	10.0124	9.12047	9.51511	10.7705	1.2554	0.000452039	TMOD1	tropomodulin 1
ENSG00000099860	GADD45B	growth arrest and DNA damage inducible beta	8.6558	9.42554	10.2393	10.7855	9.94877	9.84816	9.62415	11.628	10.3424	10.0675	9.23728	10.9166	11.657	12.2527	10.9191	11.3735	9.78961	10.9327	1.14306	0.000458247	GADD45B	growth arrest and DNA damage inducible beta
ENSG00000135476	ESPL1	extra spindle pole bodies like 1, separase	6.73979	6.22132	5.48001	4.5469	6.76796	6.47542	4.27644	1.91789	3.19724	2.63908	5.92945	0	3.08188	4.45943	3.66337	3.52141	5.78684	3.15664	-2.6302	0.000470405	ESPL1	extra spindle pole bodies like 1, separase
ENSG00000158292	GPR153	G protein-coupled receptor 153	10.6079	8.45863	6.60803	7.01107	5.52909	7.74239	5.72505	7.09967	6.29708	5.4895	7.59346	5.42624	5.92451	6.30378	6.16981	6.42673	7.38317	6.30342	-1.07975	0.000472388	GPR153	G protein-coupled receptor 153
ENSG00000219607	PPP1R3G	protein phosphatase 1 regulatory subunit 3G	3.6325	4.19003	4.80333	4.65335	5.49424	2.57451	5.01582	7.65152	4.11637	4.23111	4.67768	5.85048	6.77727	6.96578	7.10984	5.8598	4.33768	5.91554	1.57786	0.000479762	PPP1R3G	protein phosphatase 1 regulatory subunit 3G
ENSG00000151623	NR3C2	nuclear receptor subfamily 3 group C member 2	8.98051	9.04694	9.19211	8.57507	8.73579	8.5081	8.84361	7.5765	8.1854	8.35452	8.77323	7.65497	7.89657	7.2854	8.22203	8.58574	8.84031	8.05937	-0.780931	0.000495487	NR3C2	nuclear receptor subfamily 3 group C member 2
ENSG00000235363	SNRPGP10	small nuclear ribonucleoprotein polypeptide G pseudogene 10	5.75322	5.89867	5.91681	5.95094	5.56311	5.51128	5.53629	6.69782	6.40537	6.94681	5.32895	6.15682	6.56612	7.07682	6.56014	6.5751	5.7329	6.47933	0.746423	0.000517631	SNRPGP10	small nuclear ribonucleoprotein polypeptide G pseudogene 10
ENSG00000115540	MOB4	MOB family member 4, phocein	9.74034	9.76576	9.67912	10.0641	9.77641	9.64433	9.91656	9.04952	9.03906	9.52405	9.011	8.7567	9.04625	9.40514	9.66721	9.70558	9.79809	9.24494	-0.553145	0.000528889	MOB4	MOB family member 4, phocein
ENSG00000170006	TMEM154	transmembrane protein 154	8.0223	6.52143	9.666	7.4031	6.59786	6.60962	8.23628	7.01955	5.8115	6.5718	6.06811	6.51252	6.91258	6.78136	7.21746	5.21364	7.57951	6.4565	-1.12301	0.000535266	TMEM154	transmembrane protein 154
ENSG00000197785	ATAD3A	ATPase family, AAA domain containing 3A	8.57184	8.41554	7.90439	8.6477	8.70945	8.65725	8.32163	9.37945	9.15992	9.88641	8.43813	9.13363	9.11909	9.42417	8.82717	8.62031	8.46111	9.10981	0.648695	0.000537284	ATAD3A	ATPase family, AAA domain containing 3A
ENSG00000205362	MT1A	metallothionein 1A	8.29342	6.73899	8.77255	9.24536	5.83782	9.93838	8.1943	11.9376	11.471	9.06176	8.28659	10.2907	11.4389	13.6721	9.29526	8.58136	8.14583	10.4484	2.30254	0.000544467	MT1A	metallothionein 1A
ENSG00000108639	SYNGR2	synaptogyrin 2	10.1366	9.84367	10.0311	9.88997	9.87111	9.71197	10.3195	10.2058	10.0051	10.597	10.2111	10.9825	10.9163	10.5536	10.4765	10.4487	9.97199	10.4885	0.516511	0.000545335	SYNGR2	synaptogyrin 2
ENSG00000173926	2020-03-03	membrane associated ring-CH-type finger 3	4.8425	4.89503	5.35469	6.1819	5.83782	5.76246	5.35762	7.51938	6.2201	5.70729	5.91114	6.37328	7.74301	7.7879	5.68849	6.19407	5.46172	6.57163	1.10991	0.000573043	2020-03-03	membrane associated ring-CH-type finger 3
ENSG00000283342	AC241584.2	---	9.65838	9.8255	6.71389	6.03211	5.89237	8.47833	4.27644	3.35928	6.82483	4.76271	6.72138	3.38541	3.34007	3.70044	5.63303	6.70962	7.26815	4.93742	-2.33073	0.000590185	AC241584.2	---
ENSG00000254198	AC113191.1	---	3.72426	3.17812	4.29034	3.43896	4.6577	4.54257	4.63139	2.49343	3.19724	3.76027	3.24091	2.86788	1.80284	2.80735	2.28986	2.77058	4.06619	2.80337	-1.26282	0.000595851	AC113191.1	---
ENSG00000224597	SVIL-AS1	SVIL antisense RNA 1	9.83986	7.64372	9.41644	6.4564	6.69312	7.49729	6.82576	7.5765	6.60023	6.64901	7.26621	6.8511	6.39177	6.70044	6.99354	6.17093	7.76751	6.79997	-0.967542	0.000609205	SVIL-AS1	SVIL antisense RNA 1
ENSG00000137338	PGBD1	piggyBac transposable element derived 1	7.11518	6.91431	6.82438	7.38003	6.73849	6.89143	6.82576	6.49054	6.2002	6.15124	6.4819	6.51252	6.25741	6.47573	6.84279	5.77027	6.95565	6.35362	-0.602031	0.000617823	PGBD1	piggyBac transposable element derived 1
ENSG00000105677	TMEM147	transmembrane protein 147	9.54813	8.99585	9.28306	9.06425	8.93081	9.36955	9.18112	10.1075	9.41219	9.41775	9.19061	9.62102	10.0093	9.86264	9.80063	9.90102	9.19611	9.70252	0.506409	0.000650318	TMEM147	transmembrane protein 147
ENSG00000013016	EHD3	EH domain containing 3	8.96649	10.0995	10.5537	11.4942	9.10258	10.3245	9.30219	7.59735	8.13911	8.1886	10.4628	9.01274	8.53865	7.02237	8.70809	6.98634	9.97759	8.29511	-1.68248	0.000676284	EHD3	EH domain containing 3
ENSG00000272869	AC008575.2	---	2.34259	2.15398	3.98673	0.922201	1.07167	1.16296	1.05737	5.7494	5.15911	2.0488	3.64709	4.38886	1.80284	5.85798	5.17036	2.16809	1.81393	3.99917	2.18524	0.000681944	AC008575.2	---
ENSG00000158156	XKR8	XK related 8	8.2439	8.23456	8.65786	7.77729	8.28414	8.17855	8.02499	8.49707	8.40998	8.49915	9.03445	8.79813	8.7199	10.1357	8.83333	9.48649	8.20018	8.93491	0.734729	0.000686587	XKR8	XK related 8
ENSG00000167632	TRAPPC9	trafficking protein particle complex 9	8.30833	8.36611	8.6038	8.29578	7.73172	8.34723	8.1943	7.49736	7.29728	7.49897	8.13312	8.19424	7.81919	7.60733	7.60386	7.1491	8.26389	7.64449	-0.619399	0.000692991	TRAPPC9	trafficking protein particle complex 9
ENSG00000257065	AL049844.1	---	1.78378	2.98205	1.51434	2.86097	4.59331	3.07639	3.27039	5.67289	3.19724	6.36768	5.64922	5.35401	5.16377	6.32193	1.96996	2.16809	2.86875	4.65164	1.7829	0.000694904	AL049844.1	---
ENSG00000141030	COPS3	COP9 signalosome subunit 3	9.00129	9.08104	9.29591	9.4289	9.55338	9.47881	9.23906	9.73976	9.68708	10.1758	9.4488	9.73384	9.65575	9.91886	9.89795	9.39461	9.29691	9.73916	0.442245	0.000702088	COPS3	COP9 signalosome subunit 3
ENSG00000178537	SLC25A20	solute carrier family 25 member 20	11.8374	12.1844	11.2716	10.0422	10.5931	11.3433	11.1603	10.1315	9.87144	10.2483	10.6316	10.6017	11.0345	10.0182	10.4274	10.7945	11.2046	10.4177	-0.786945	0.000715608	SLC25A20	solute carrier family 25 member 20
ENSG00000167671	UBXN6	UBX domain protein 6	9.9148	10.6037	10.6921	9.71973	10.2755	10.5259	10.132	11.2338	10.1101	11.6669	11.2998	10.9491	10.5597	11.1013	11.735	10.4269	10.2662	11.0092	0.742945	0.000716507	UBXN6	UBX domain protein 6
ENSG00000258813	AL442663.3	---	0	0	0	0	0	0	0	1.91789	2.02308	3.96737	0	0	2.36413	3.32193	2.28986	2.16809	0	2.00582	2.00582	0.000718585	AL442663.3	---
ENSG00000182077	PTCHD3	patched domain containing 3	0	2.75508	3.36225	1.88167	2.10621	2.57451	0	0	0	0	0	0	0	0	0	0	1.81139	0	-1.81139	0.000776501	PTCHD3	patched domain containing 3
ENSG00000268903	AL627309.7	---	2.34259	2.48561	3.36225	3.65936	2.43495	1.7984	3.09895	3.80397	3.93556	3.51837	3.24091	3.87281	5.32175	4.90689	5.13086	3.3671	2.7403	4.12202	1.38172	0.000781124	AL627309.7	---
ENSG00000145555	MYO10	myosin X	9.72376	9.3308	9.77396	10.5612	9.53636	9.97436	8.93568	9.07699	9.19806	9.23201	9.66772	8.89358	8.99321	8.75822	8.73797	8.71132	9.69087	9.0299	-0.660971	0.000799256	MYO10	myosin X
ENSG00000197635	DPP4	dipeptidyl peptidase 4	11.0399	10.9954	10.5872	9.70897	9.42282	9.61271	9.69172	8.99818	8.53045	8.97447	10.1922	9.67946	8.36074	9.24079	9.69117	8.98775	10.1512	9.18391	-0.967324	0.000804071	DPP4	dipeptidyl peptidase 4
ENSG00000225972	MTND1P23	mitochondrially encoded NADH:ubiquinone oxidoreductase core subunit 1 pseudogene 23	8.70731	10.2984	9.55998	15.5619	9.2004	9.20057	9.47213	9.73819	10.6472	10.4462	13.0387	9.62486	14.0865	10.1228	10.3174	11.5351	10.2858	11.0619	0.77609	0.000812526	MTND1P23	mitochondrially encoded NADH:ubiquinone oxidoreductase core subunit 1 pseudogene 23
ENSG00000114315	HES1	hes family bHLH transcription factor 1	7.80834	8.53666	8.92361	9.28315	9.49068	8.33621	9.23129	9.67257	11.1798	9.75637	8.33202	9.92516	9.97167	10.3934	9.58007	9.31242	8.80142	9.7915	0.990075	0.000837965	HES1	hes family bHLH transcription factor 1
ENSG00000145506	NKD2	naked cuticle homolog 2	3.89193	0	2.90658	4.43196	4.6577	4.75609	5.23873	7.63145	4.67333	5.55515	5.5343	6.39144	6.19343	7.65105	4.20987	4.20722	3.69757	5.78303	2.08546	0.000847523	NKD2	naked cuticle homolog 2
ENSG00000198074	AKR1B10	aldo-keto reductase family 1 member B10	9.09666	7.16613	7.97529	7.57547	11.8559	7.26132	10.2723	6.73593	6.56952	9.10624	7.4924	6.6395	3.91692	3.80735	4.7162	5.07096	8.7433	6.00611	-2.73718	0.000855769	AKR1B10	aldo-keto reductase family 1 member B10
ENSG00000132329	RAMP1	receptor activity modifying protein 1	7.21345	7.96254	8.27244	7.02104	7.41521	6.96482	7.4338	7.60424	9.17784	7.05289	7.98782	9.38087	8.22331	9.14466	7.89071	9.57507	7.46904	8.4486	0.979556	0.000866672	RAMP1	receptor activity modifying protein 1
ENSG00000255986	MT1JP	metallothionein 1J, pseudogene	4.96041	4.2782	6.04404	5.6244	3.12318	6.55363	5.19682	7.61109	6.33409	1.62842	5.5343	6.40937	8.808	8.43045	6.76752	8.5901	5.11153	6.67926	1.56773	0.00090871	MT1JP	metallothionein 1J, pseudogene
ENSG00000112984	KIF20A	kinesin family member 20A	3.05829	3.88773	4.35721	4.97408	7.56544	8.0154	3.27039	0	3.02689	2.0488	5.67114	2.37849	2.9331	0	3.13425	2.16809	5.01836	2.37342	-2.64494	0.000909294	KIF20A	kinesin family member 20A
ENSG00000134716	CYP2J2	cytochrome P450 family 2 subfamily J member 2	12.2506	11.3755	11.3253	10.101	11.052	11.2251	10.911	9.53705	10.2267	10.6904	10.662	10.5389	10.1135	10.1898	10.8832	10.7973	11.1772	10.4043	-0.772889	0.000915175	CYP2J2	cytochrome P450 family 2 subfamily J member 2
ENSG00000281655	AP000851.2	---	3.5345	2.15398	5.41871	1.88167	4.5259	4.82078	4.27644	5.17779	4.19893	5.89648	5.12166	7.02401	7.19175	5.24793	4.42109	6.86185	3.80171	5.68239	1.88067	0.000917432	AP000851.2	---
ENSG00000223459	TCAF1P1	TRPM8 channel associated factor 1 pseudogene 1	8.19662	8.41067	8.61751	6.49985	7.96591	8.34173	7.33099	6.61845	7.6599	6.79203	7.90698	6.7562	6.05626	6.59991	7.21746	6.04934	7.90904	6.85072	-1.05832	0.000924372	TCAF1P1	TRPM8 channel associated factor 1 pseudogene 1
ENSG00000164237	CMBL	carboxymethylenebutenolidase homolog	12.7715	12.8509	9.96429	10.7011	10.0024	12.1235	8.74527	8.24735	9.5205	9.61921	10.8772	8.20455	8.43525	7.93074	10.7338	10.2778	11.0227	9.31626	-1.70645	0.00094886	CMBL	carboxymethylenebutenolidase homolog
ENSG00000072694	FCGR2B	Fc fragment of IgG receptor IIb	9.37845	10.1486	10.1977	11.5832	8.8191	9.55684	9.05777	8.89529	9.27143	8.55237	9.50328	9.35566	8.91105	8.86109	8.9933	9.00421	9.82023	9.03863	-0.781603	0.000968123	FCGR2B	Fc fragment of IgG receptor IIb
ENSG00000269001	AC092070.2	---	1.78378	1.72262	2.90658	2.6713	2.10621	1.7984	3.27039	1.51221	3.48736	4.52126	2.02649	5.90205	5.73525	4.16993	1.96996	4.8557	2.32276	3.7978	1.47505	0.000986278	AC092070.2	---
ENSG00000144136	SLC20A1	solute carrier family 20 member 1	8.5343	9.06873	9.84267	9.59505	9.69628	10.1308	9.19981	11.998	9.96288	10.5485	9.56314	10.2663	10.2544	12.6223	9.81783	9.21681	9.43824	10.4722	1.03399	0.00101607	SLC20A1	solute carrier family 20 member 1
ENSG00000089127	OAS1	2-5-oligoadenylate synthetase 1	10.7606	9.87935	9.84413	9.7753	9.99155	10.1435	9.17034	7.29951	9.18546	8.64574	9.85056	9.40342	8.95513	8.78463	9.47556	9.00093	9.93784	8.95566	-0.982176	0.00101843	OAS1	2-5-oligoadenylate synthetase 1
ENSG00000228327	AL669831.1	---	6.35099	6.03144	6.30343	6.4116	6.51338	5.15772	6.39656	6.97775	7.17003	6.63389	6.89911	6.91526	6.99934	8.04985	6.38654	6.757	6.16645	6.97653	0.810083	0.00105295	AL669831.1	---
ENSG00000158716	DUSP23	dual specificity phosphatase 23	9.2259	9.64867	10.4378	9.12101	9.69628	9.14797	9.2697	10.466	9.29743	10.1172	9.62342	10.9275	10.4596	10.3912	10.686	10.8456	9.50676	10.3127	0.805918	0.00108205	DUSP23	dual specificity phosphatase 23
ENSG00000088179	PTPN4	protein tyrosine phosphatase, non-receptor type 4	9.1285	9.17302	9.11692	8.90637	8.67875	8.83218	8.77049	8.18443	8.58903	8.42206	8.86407	8.45387	8.13665	8.0607	8.9024	8.21359	8.94375	8.4252	-0.518548	0.00110063	PTPN4	protein tyrosine phosphatase, non-receptor type 4
ENSG00000124615	MOCS1	molybdenum cofactor synthesis 1	9.67573	9.17302	9.62926	9.70433	9.82278	9.74568	9.75446	10.199	10.1115	10.3593	10.0911	10.1853	10.0862	10.8796	9.37982	10.2297	9.64361	10.1691	0.52545	0.00113428	MOCS1	molybdenum cofactor synthesis 1
ENSG00000109436	TBC1D9	TBC1 domain family member 9	9.7783	9.76956	9.98427	10.3005	9.55972	10.0838	9.72343	9.4112	9.72414	9.37749	9.82022	8.96807	8.96953	9.43254	9.25219	9.47473	9.88567	9.38112	-0.504543	0.00113682	TBC1D9	TBC1 domain family member 9
ENSG00000103066	PLA2G15	phospholipase A2 group XV	7.95286	8.1611	7.66142	8.20242	8.15066	8.16615	7.88023	7.4825	7.68875	7.8126	7.25899	7.72108	7.2868	6.58496	6.53009	7.61114	8.02498	7.33077	-0.694213	0.00116324	PLA2G15	phospholipase A2 group XV
ENSG00000125844	RRBP1	ribosome binding protein 1	13.3537	13.2226	13.147	13.1113	13.2047	13.3653	13.389	13.9211	13.7865	14.1214	13.296	13.7951	13.836	13.8609	13.058	13.7194	13.2562	13.7105	0.454249	0.00116617	RRBP1	ribosome binding protein 1
ENSG00000118939	UCHL3	ubiquitin C-terminal hydrolase L3	8.63231	8.96297	9.23941	9.32402	9.01925	9.05356	9.47652	9.35721	10.0503	10.322	8.87119	9.70146	9.92687	9.86264	9.41519	9.65019	9.10115	9.68412	0.582968	0.00128034	UCHL3	ubiquitin C-terminal hydrolase L3
ENSG00000163092	XIRP2	xin actin binding repeat containing 2	0	2.15398	2.49613	2.19535	2.10621	0	2.67935	0	0	0	0	0	0	0	0	0	1.66158	0	-1.66158	0.00129041	XIRP2	xin actin binding repeat containing 2
ENSG00000166856	GPR182	G protein-coupled receptor 182	5.203	7.48605	7.68765	9.64912	7.62302	8.36361	7.57136	4.06574	6.33409	6.17231	7.64422	6.23934	7.58989	5.97728	6.54519	5.16763	7.65483	6.19285	-1.46197	0.00131111	GPR182	G protein-coupled receptor 182
ENSG00000072422	RHOBTB1	Rho related BTB domain containing 1	8.81036	9.06254	9.4513	9.30577	8.71325	8.73483	8.76691	7.3739	8.91021	8.38192	8.65168	8.02429	7.41156	7.99435	8.78007	8.00701	8.97785	8.17055	-0.807296	0.00133191	RHOBTB1	Rho related BTB domain containing 1
ENSG00000105810	CDK6	cyclin dependent kinase 6	10.2692	10.6196	9.98955	9.19116	9.73223	9.80284	9.67465	9.50246	9.59099	9.34537	9.54841	9.18399	8.83708	9.36851	9.22431	9.55957	9.89703	9.35119	-0.545839	0.00133224	CDK6	cyclin dependent kinase 6
ENSG00000162194	LBHD1	LBH domain containing 1	8.52476	7.87336	7.99117	7.24185	7.26828	10.4601	8.76333	7.54822	7.55409	6.70793	7.92534	7.22976	7.08999	7.05528	6.54519	8.34859	8.30327	7.33382	-0.969449	0.00133946	LBHD1	LBH domain containing 1
ENSG00000138315	OIT3	oncoprotein induced transcript 3	10.7124	11.5511	11.9656	12.7891	11.4731	11.9724	10.7409	8.86981	9.97903	10.8419	11.7024	11.3894	10.046	10.3945	9.82558	10.4463	11.6006	10.3883	-1.21232	0.00134283	OIT3	oncoprotein induced transcript 3
ENSG00000274736	CCL23	C-C motif chemokine ligand 23	6.13394	6.26513	6.49379	8.37181	4.38084	6.53447	7.16702	5.35148	5.02974	5.67812	5.94753	5.95185	5.88455	5.88264	5.13086	5.42396	6.47814	5.58675	-0.891393	0.0013728	CCL23	C-C motif chemokine ligand 23
ENSG00000185634	SHC4	SHC adaptor protein 4	1.78378	2.75508	2.23676	2.6713	2.10621	2.23802	2.67935	4.64858	5.48943	2.63908	4.28131	2.05309	4.06729	2.58496	4.42109	2.16809	2.35293	3.59477	1.24184	0.0013785	SHC4	SHC adaptor protein 4
ENSG00000182944	EWSR1	EWS RNA binding protein 1	11.6972	11.2652	11.367	11.9667	12.0056	11.5631	11.5377	12.3068	12.2948	12.7433	12.0002	12.1058	12.0537	12.5421	11.6336	11.8638	11.6289	12.1716	0.542635	0.00138124	EWSR1	EWS RNA binding protein 1
ENSG00000279035	AC022211.4	---	0	0	0	0	0	0	0	1.91789	2.02308	2.0488	2.6735	0	2.9331	2	0	1.73532	0	1.70352	1.70352	0.00139048	AC022211.4	---
ENSG00000159899	NPR2	natriuretic peptide receptor 2	9.89149	8.60644	9.3767	7.33276	9.13687	8.89361	8.71218	8.27349	7.139	6.93453	8.65168	7.75653	7.99369	7.37504	8.13985	8.69924	8.85001	7.88478	-0.965223	0.00140823	NPR2	natriuretic peptide receptor 2
ENSG00000120942	UBIAD1	UbiA prenyltransferase domain containing 1	8.56254	8.48665	8.25501	8.52337	8.65922	8.58925	8.95466	9.85245	9.09941	9.90226	8.54292	9.34638	9.02343	9.65284	8.87577	8.45298	8.57582	9.19427	0.618455	0.0014173	UBIAD1	UbiA prenyltransferase domain containing 1
ENSG00000173898	SPTBN2	spectrin beta, non-erythrocytic 2	10.4192	9.98136	10.7146	8.25831	9.82629	9.92924	9.77953	7.83828	8.63053	8.99826	10.2054	8.83508	8.21528	8.53916	8.86678	9.18252	9.84406	8.81237	-1.0317	0.00144319	SPTBN2	spectrin beta, non-erythrocytic 2
ENSG00000207425	Y_RNA	Y RNA	5.85822	5.10245	0	0.922201	3.5872	0	1.05737	1.51221	0	0	0	0	1.41108	0	0.980041	0	2.36107	0.433704	-1.92736	0.00144363	Y_RNA	Y RNA
ENSG00000227066	Z98257.1	---	4.75818	5.24053	5.44969	4.75249	6.24654	5.62432	5.35762	8.45199	7.08575	6.92214	2.98492	6.59318	7.96044	8.31288	4.81919	4.79647	5.34705	6.43633	1.08928	0.00145907	Z98257.1	---
ENSG00000262481	TMEM256-PLSCR3	TMEM256-PLSCR3 readthrough (NMD candidate)	1.78378	3.17812	0	4.17033	3.83009	1.7984	3.09895	1.91789	0	1.03271	1.72491	0	0.871594	1.58496	0	0	2.55138	0.792452	-1.75893	0.00146259	TMEM256-PLSCR3	TMEM256-PLSCR3 readthrough (NMD candidate)
ENSG00000151470	C4orf33	chromosome 4 open reading frame 33	8.52795	7.73222	6.80055	8.09791	8.49709	9.06361	7.61975	6.42984	7.37923	7.64934	7.74586	6.81119	7.27911	7.34873	7.36943	7.46662	8.04844	7.27548	-0.772956	0.00147086	C4orf33	chromosome 4 open reading frame 33
ENSG00000187048	CYP4A11	cytochrome P450 family 4 subfamily A member 11	12.2	13.137	11.1759	11.1341	11.3061	12.8768	9.95478	9.54064	10.8202	10.3753	11.745	9.28214	6.27297	10.6644	10.713	10.391	11.6835	9.97831	-1.7052	0.00150121	CYP4A11	cytochrome P450 family 4 subfamily A member 11
ENSG00000115970	THADA	THADA, armadillo repeat containing	9.58379	9.72712	9.36456	9.55441	9.06449	9.48382	9.6593	11.0675	11.0044	10.6477	9.51697	11.044	10.1264	11.0593	8.97111	8.87058	9.49107	10.2565	0.765384	0.00152557	THADA	THADA, armadillo repeat containing
ENSG00000120341	SEC16B	SEC16 homolog B, endoplasmic reticulum export factor	9.96739	10.2474	9.61396	8.93303	9.6094	9.56158	9.73446	8.38162	9.05577	8.97146	9.61496	8.60934	7.7148	9.50779	9.02597	8.71132	9.66675	8.84367	-0.823082	0.00152625	SEC16B	SEC16 homolog B, endoplasmic reticulum export factor
ENSG00000229267	AC016708.1	---	2.34259	0	2.49613	2.6713	3.12318	1.7984	2.08522	0	0	0	1.72491	0	0	0	0	0	2.07383	0.191657	-1.88218	0.00157203	AC016708.1	---
ENSG00000183570	PCBP3	poly(rC) binding protein 3	2.74437	3.50482	4.65174	4.5469	4.71934	4.29186	5.27946	6.02037	6.03022	5.55515	4.84133	4.65247	6.24168	6.88264	5.63303	3.90469	4.24836	5.52906	1.28071	0.00157318	PCBP3	poly(rC) binding protein 3
ENSG00000166922	SCG5	secretogranin V	7.83431	8.74825	5.77726	6.16401	5.80976	5.05391	5.19682	5.14039	4.83696	3.05677	5.46067	3.52354	4.44242	5.45943	5.71544	6.66063	6.36919	4.92181	-1.44738	0.00159247	SCG5	secretogranin V
ENSG00000258498	DIO3OS	DIO3 opposite strand/antisense RNA (head to head)	3.31596	3.17812	2.71591	4.9324	5.80976	4.38036	4.96679	3.70498	7.08575	6.3118	5.8926	7.34605	6.39177	5.9542	4.48514	5.21364	4.18561	5.82066	1.63505	0.00160564	DIO3OS	DIO3 opposite strand/antisense RNA (head to head)
ENSG00000198203	SULT1C2	sulfotransferase family 1C member 2	3.89193	4.19003	3.48694	5.95094	2.92812	5.91839	4.19363	3.48395	3.02689	2.86299	4.28131	3.06176	2.11061	3.58496	3.13425	1.11421	4.36571	2.96233	-1.40339	0.00163626	SULT1C2	sulfotransferase family 1C member 2
ENSG00000119125	GDA	guanine deaminase	9.31345	10.0009	11.1413	7.72333	8.59078	9.22168	9.57796	9.64446	8.40564	8.1886	8.95177	8.60546	7.7148	8.08215	7.16953	7.81143	9.36706	8.28598	-1.08108	0.00163719	GDA	guanine deaminase
ENSG00000158710	TAGLN2	transgelin 2	11.2137	11.0488	11.4011	12.2093	12.3518	11.4033	12.7492	13.2669	12.7324	13.4093	11.6578	13.5212	13.5096	13.4351	12.3529	11.2534	11.7682	12.7932	1.02501	0.00163873	TAGLN2	transgelin 2
ENSG00000233559	LINC00513	long intergenic non-protein coding RNA 513	2.09008	3.50482	2.49613	3.55337	0	3.27414	2.90435	4.53789	4.67333	3.76027	2.2758	2.64384	4.73986	6	4.04966	5.07096	2.54613	4.19462	1.6485	0.00167384	LINC00513	long intergenic non-protein coding RNA 513
ENSG00000225792	AC004540.2	---	5.77484	6.4473	3.89967	4.79961	3.12318	5.38862	4.75207	3.07208	4.27702	2.86299	3.11858	3.23264	3.34007	2.80735	3.42294	5.25823	4.88361	3.48799	-1.39562	0.00170588	AC004540.2	---
ENSG00000069122	ADGRF5	adhesion G protein-coupled receptor F5	10.0056	10.7563	10.7469	12.2777	9.62559	10.3779	10.1812	9.73506	10.3276	9.8061	10.2679	9.98019	8.91105	9.77314	9.75426	9.50279	10.5673	9.78423	-0.783092	0.00172293	ADGRF5	adhesion G protein-coupled receptor F5
ENSG00000244161	FLNB-AS1	FLNB antisense RNA 1	4.17815	4.43984	2.71591	4.37087	5.38436	4.29186	5.35762	8.47471	5.88815	5.84491	4.03304	5.68367	6.3036	6.04439	4.60529	4.67016	4.39123	5.72755	1.33632	0.00172452	FLNB-AS1	FLNB antisense RNA 1
ENSG00000187091	PLCD1	phospholipase C delta 1	8.05359	8.32012	8.15048	8.50216	7.72422	8.0154	7.92585	6.64539	7.85074	7.7855	7.93443	7.5538	6.6638	7.26679	7.56734	7.40846	8.09883	7.40847	-0.690359	0.00172661	PLCD1	phospholipase C delta 1
ENSG00000261618	AC083837.1	---	2.55742	3.99569	3.48694	3.17872	4.13159	4.0967	3.42361	0	3.34958	4.58551	3.73298	5.76949	7.87634	6.84549	5.51526	4.79647	3.55295	4.71901	1.16606	0.00176061	AC083837.1	---
ENSG00000154864	PIEZO2	piezo type mechanosensitive ion channel component 2	9.59142	9.70939	10.1276	9.12564	9.40183	9.47379	9.84713	7.26518	8.38815	8.87192	8.64338	8.87111	9.68513	7.09803	8.85167	9.09304	9.61098	8.52974	-1.08124	0.00178783	PIEZO2	piezo type mechanosensitive ion channel component 2
ENSG00000169239	CA5B	carbonic anhydrase 5B	5.29565	6.1295	6.40175	7.16295	7.88752	5.85802	7.34064	6.46051	7.56969	9.08695	7.37708	8.75319	9.11694	8.86728	6.54519	7.06375	6.58229	7.87118	1.28888	0.00178955	CA5B	carbonic anhydrase 5B
ENSG00000108515	ENO3	enolase 3	11.7582	11.0706	12.2051	9.67935	9.28946	10.0706	10.9247	9.51712	8.66724	8.30767	9.60503	9.5256	9.06425	7.56224	10.8271	10.7385	10.714	9.31276	-1.40123	0.0018126	ENO3	enolase 3
ENSG00000177485	ZBTB33	zinc finger and BTB domain containing 33	10.145	10.0074	10.3086	9.66033	10.1608	9.93107	9.92941	9.32006	9.56203	9.77026	9.79673	9.71233	9.47245	9.90539	9.8022	9.39211	10.0204	9.63706	-0.383298	0.00182298	ZBTB33	zinc finger and BTB domain containing 33
ENSG00000249007	AL691482.3	---	4.24164	6.32845	5.93881	6.55582	5.91888	5.69504	5.31907	7.30797	6.48978	6.34929	5.38309	6.92776	6.98996	8.2854	6.35261	7.35814	5.71396	6.82711	1.11315	0.00182608	AL691482.3	---
ENSG00000164512	ANKRD55	ankyrin repeat domain 55	5.61621	6.87243	6.08408	8.20242	5.49424	6.39273	4.56705	3.5987	5.67394	4.38346	6.4442	5.42624	4.38629	3.70044	4.81919	3.1943	6.1756	4.6252	-1.5504	0.00183762	ANKRD55	ankyrin repeat domain 55
ENSG00000134107	BHLHE40	basic helix-loop-helix family member e40	10.2928	11.8087	11.1931	11.4816	11.7505	12.1323	11.8531	12.1285	13.6618	12.8585	11.4417	12.6206	12.5787	13.0185	11.9552	11.453	11.5017	12.4129	0.911218	0.00185175	BHLHE40	basic helix-loop-helix family member e40
ENSG00000135870	RC3H1	ring finger and CCCH-type domains 1	10.2394	9.65074	9.9235	9.82598	9.25865	9.56866	7.28172	9.79495	6.70282	7.35892	9.26818	7.68473	6.95179	6.67243	8.12485	7.08865	9.39266	7.73859	-1.65407	0.0018692	RC3H1	ring finger and CCCH-type domains 1
ENSG00000153208	MERTK	MER proto-oncogene, tyrosine kinase	10.0147	9.87582	10.2613	10.4839	8.82613	9.52079	9.88886	9.41512	9.42296	7.87178	9.27714	9.62294	9.02573	8.98299	9.25219	9.11745	9.8388	9.10981	-0.728983	0.0018762	MERTK	MER proto-oncogene, tyrosine kinase
ENSG00000104728	ARHGEF10	Rho guanine nucleotide exchange factor 10	4.57313	2.48561	5.38705	5.67582	4.21955	6.05909	5.66483	7.83243	5.23933	6.06371	6.31089	6.40937	7.88649	8.22882	5.63303	3.78789	4.86644	6.37688	1.51044	0.00187655	ARHGEF10	Rho guanine nucleotide exchange factor 10
ENSG00000143994	ABHD1	abhydrolase domain containing 1	6.27717	5.40621	4.06883	4.17033	4.03792	5.05391	5.15366	1.91789	3.72879	3.86753	4.54148	3.76551	4.32788	4.16993	2.55154	3.52141	4.88115	3.59911	-1.28204	0.00188062	ABHD1	abhydrolase domain containing 1
ENSG00000101204	CHRNA4	cholinergic receptor nicotinic alpha 4 subunit	10.7019	10.5032	7.25973	7.01107	5.6917	8.53726	7.0424	5.95725	4.78445	4.70603	7.28766	6.91526	4.94807	7.32193	7.0262	8.43852	8.10675	6.37615	-1.7306	0.00190032	CHRNA4	cholinergic receptor nicotinic alpha 4 subunit
ENSG00000184990	SIVA1	SIVA1 apoptosis inducing factor	8.4925	8.5277	8.48173	9.07147	9.15928	8.52275	9.03119	8.73518	10.4379	9.97453	8.81814	8.92197	9.50411	9.40727	9.43357	9.55063	8.75523	9.42037	0.665139	0.00190357	SIVA1	SIVA1 apoptosis inducing factor
ENSG00000198105	ZNF248	zinc finger protein 248	8.94041	8.99259	8.68088	8.60191	7.56544	8.29696	8.48291	8.31184	7.48995	6.55585	7.48003	7.80475	7.85582	5.90689	7.81796	8.24162	8.50873	7.49608	-1.01265	0.00192601	ZNF248	zinc finger protein 248
ENSG00000183853	KIRREL1	kirre like nephrin family adhesion molecule 1	8.00868	7.20038	8.94822	7.46288	8.13378	7.02096	7.03052	9.06706	6.6886	9.03899	9.34861	8.03588	9.4623	9.47573	9.05263	8.59446	7.68649	8.75159	1.0651	0.001936	KIRREL1	kirre like nephrin family adhesion molecule 1
ENSG00000142875	PRKACB	protein kinase cAMP-activated catalytic subunit beta	10.4217	10.2488	10.3274	10.68	10.0377	10.181	10.0695	9.58829	9.64904	9.99833	10.2544	9.35566	9.87045	9.31967	9.99189	10.0223	10.2809	9.78333	-0.497551	0.00199392	PRKACB	protein kinase cAMP-activated catalytic subunit beta
ENSG00000188613	NANOS1	nanos C2HC-type zinc finger 1	4.11174	3.77104	2.23676	2.6713	2.70251	3.07639	2.41266	4.80016	2.61058	4.58551	4.28131	3.06176	5.54327	4.85798	4.54646	4.29544	2.99748	4.28694	1.28946	0.00199895	NANOS1	nanos C2HC-type zinc finger 1
ENSG00000108448	TRIM16L	tripartite motif containing 16 like	7.37081	7.58443	7.28571	5.88692	8.22692	6.55363	6.93177	5.21424	6.87592	6.42148	6.05149	5.99998	6.99934	6	6.31785	6.21684	7.12003	6.23302	-0.887011	0.00200678	TRIM16L	tripartite motif containing 16 like
ENSG00000242114	MTFP1	mitochondrial fission process 1	7.22135	6.28655	7.16024	7.80643	7.06959	7.44695	7.25133	9.27763	8.50228	8.54431	6.75256	7.66247	7.95563	7.65821	7.78653	7.89146	7.17749	8.00345	0.825963	0.00205143	MTFP1	mitochondrial fission process 1
ENSG00000203907	OOEP	oocyte expressed protein	1.78378	3.17812	1.51434	3.7581	2.10621	2.23802	2.90435	0	0	0	0	0	0	0	2.55154	0	2.49756	0.283505	-2.21406	0.00205486	OOEP	oocyte expressed protein
ENSG00000115155	OTOF	otoferlin	2.34259	0	2.90658	4.17033	0	4.68837	2.67935	0	0	2.0488	0	0	0	0	0	0	2.39818	0.227644	-2.17053	0.00207359	OTOF	otoferlin
ENSG00000165195	PIGA	phosphatidylinositol glycan anchor biosynthesis class A	7.99031	8.05279	8.03778	8.19803	8.13378	7.52667	8.40682	10.2081	9.08592	8.84919	8.08085	8.77411	9.45379	10.3608	8.57462	6.40706	8.04946	8.86605	0.816595	0.00208277	PIGA	phosphatidylinositol glycan anchor biosynthesis class A
ENSG00000155659	VSIG4	V-set and immunoglobulin domain containing 4	10.8827	11.2886	11.5919	11.6466	9.95358	10.7344	11.0754	10.4209	10.7363	9.38653	10.7032	10.9368	9.46569	9.31515	9.63404	8.30143	11.0247	9.87779	-1.14693	0.002087	VSIG4	V-set and immunoglobulin domain containing 4
ENSG00000115758	ODC1	ornithine decarboxylase 1	10.5558	10.7621	10.432	10.6033	11.3223	11.1358	11.1314	13.3715	11.3045	12.766	10.5862	12.2353	11.6191	13.7366	10.4745	9.43401	10.8489	11.7253	0.876363	0.00210971	ODC1	ornithine decarboxylase 1
ENSG00000058673	ZC3H11A	zinc finger CCCH-type containing 11A	8.15188	11.5248	9.35845	7.94387	11.7565	8.90111	8.79176	5.91358	9.01077	8.48658	8.48839	8.5337	8.97667	7.27612	8.89358	8.42391	9.48977	8.22259	-1.26718	0.00212001	ZC3H11A	zinc finger CCCH-type containing 11A
ENSG00000163874	ZC3H12A	zinc finger CCCH-type containing 12A	6.91553	6.78486	7.64144	8.19803	7.94671	7.43666	7.17783	8.05475	9.21055	8.3999	6.84226	8.49223	9.4892	11.1098	7.46782	6.46527	7.44301	8.39242	0.949416	0.00212296	ZC3H12A	zinc finger CCCH-type containing 12A
ENSG00000215483	LINC00598	long intergenic non-protein coding RNA 598	5.10398	4.83816	4.59745	4.75249	3.5872	4.82078	3.68846	7.53387	4.27702	4.64703	5.2727	6.06929	5.491	5.24793	5.04846	6.72558	4.48407	5.59032	1.10625	0.00214251	LINC00598	long intergenic non-protein coding RNA 598
ENSG00000060971	ACAA1	acetyl-CoA acyltransferase 1	13.7431	13.2891	12.1851	11.8112	11.87	12.6759	11.7627	10.8379	11.2162	11.644	12.3257	11.4174	11.0817	11.0485	12.0246	12.4596	12.4767	11.5617	-0.914998	0.00214952	ACAA1	acetyl-CoA acyltransferase 1
ENSG00000054938	CHRDL2	chordin like 2	7.89481	7.95587	8.24622	6.56948	8.42492	8.07628	8.42054	9.29049	8.39254	8.43955	8.07263	8.47956	9.31786	8.91886	8.45577	9.57507	7.94116	8.77137	0.830211	0.0021597	CHRDL2	chordin like 2
ENSG00000249852	AC145676.1	---	4.04213	2.98205	1.51434	3.02857	3.93775	3.27414	2.41266	4.53789	3.19724	4.8698	3.96367	4.97497	5.73525	3.16993	3.66337	5.53685	3.02738	4.40544	1.37806	0.00216188	AC145676.1	---
ENSG00000227719	AC006042.1	---	0	1.72262	0	0	2.10621	1.7984	0	2.23417	2.8337	2.37392	2.6735	2.86788	2.57969	3.16993	2.28986	1.73532	0.80389	2.52866	1.72477	0.00217593	AC006042.1	---
ENSG00000135521	LTV1	LTV1 ribosome biogenesis factor	9.29674	9.71533	9.70021	9.81024	9.83676	10.0336	9.96418	10.6225	10.4548	10.8028	9.67452	10.5988	10.3007	11.06	9.91549	9.62061	9.76529	10.3389	0.573627	0.00218878	LTV1	LTV1 ribosome biogenesis factor
ENSG00000121274	PAPD5	poly(A) RNA polymerase D5, non-canonical	10.3756	10.8302	10.2393	8.44773	8.50587	8.20302	9.28729	9.22724	7.86976	8.56835	8.82304	9.18659	7.08999	8.7039	8.4397	8.45776	9.41272	8.48515	-0.927566	0.00221354	PAPD5	poly(A) RNA polymerase D5, non-canonical
ENSG00000125148	MT2A	metallothionein 2A	12.9717	11.7327	12.74	13.4343	12.6255	14.0458	14.3189	15.6495	14.1771	12.5218	13.6682	13.8535	15.1217	16.3744	13.633	14.3091	13.1241	14.3676	1.24347	0.00222802	MT2A	metallothionein 2A
ENSG00000104369	JPH1	junctophilin 1	3.05829	2.48561	4.75455	0	4.6577	4.0967	3.5621	6.15772	4.48874	6.60318	5.32895	6.94014	4.82678	4.58496	3.54816	4.11325	3.23071	5.17688	1.94617	0.00228511	JPH1	junctophilin 1
ENSG00000136011	STAB2	stabilin 2	8.12267	9.30218	11.3836	11.3359	8.24799	10.5665	8.3976	5.28449	7.97894	7.92862	10.147	8.00672	7.72615	7.31288	7.49918	8.57256	9.62235	7.8285	-1.79385	0.00229023	STAB2	stabilin 2
ENSG00000069399	BCL3	B-cell CLL/lymphoma 3	9.60205	10.2597	9.78766	9.19558	9.56812	9.09337	10.084	11.1309	9.74833	10.2042	9.9117	10.4945	10.5802	10.7665	9.76559	10.386	9.65578	10.332	0.676217	0.00232816	BCL3	B-cell CLL/lymphoma 3
ENSG00000205361	MT1DP	metallothionein 1D, pseudogene	2.90985	2.48561	5.06574	4.75249	2.43495	5.91839	5.53629	8.27349	6.31571	3.22758	5.46067	5.49503	7.96044	11.6569	5.24625	6.69347	4.15762	6.70328	2.54566	0.00234054	MT1DP	metallothionein 1D, pseudogene
ENSG00000131482	G6PC	glucose-6-phosphatase catalytic subunit	11.1038	11.1769	11.3986	10.9725	9.76	10.225	10.0088	12.7108	11.9458	10.8856	9.24278	9.38767	13.0069	13.8092	12.7046	11.2739	10.6636	11.663	0.999392	0.0023422	G6PC	glucose-6-phosphatase catalytic subunit
ENSG00000162068	NTN3	netrin 3	1.78378	0	0	1.88167	2.10621	2.84716	2.08522	0	0	0	0	0	0	0	0	0	1.52915	0	-1.52915	0.00234501	NTN3	netrin 3
ENSG00000101457	DNTTIP1	deoxynucleotidyltransferase terminal interacting protein 1	8.53747	8.84163	8.38889	8.71377	8.34407	8.13469	8.00083	9.03175	8.67447	9.15734	8.51288	8.8417	8.74523	9.21189	9.007	8.82684	8.42305	8.8899	0.466851	0.00235037	DNTTIP1	deoxynucleotidyltransferase terminal interacting protein 1
ENSG00000101294	HM13	histocompatibility minor 13	11.2028	11.4027	11.0721	11.0537	11.3023	11.3113	11.8632	12.1536	11.9625	12.545	10.8065	12.0626	12.097	12.2264	11.3196	12.0505	11.3155	11.9137	0.59829	0.00235848	HM13	histocompatibility minor 13
ENSG00000164182	NDUFAF2	NADH:ubiquinone oxidoreductase complex assembly factor 2	8.48924	8.6484	8.31932	8.38731	8.74323	8.41689	8.7196	9.71294	9.28803	9.72996	8.16824	9.12552	9.02113	9.50581	8.39037	8.9711	8.532	9.10146	0.569458	0.00235972	NDUFAF2	NADH:ubiquinone oxidoreductase complex assembly factor 2
ENSG00000143368	SF3B4	splicing factor 3b subunit 4	8.79985	8.97291	8.89857	9.39861	9.1676	9.06027	9.08675	9.13281	9.61937	9.86876	9.28783	9.46473	9.59514	9.79116	9.27048	9.17382	9.05494	9.46712	0.412183	0.00239973	SF3B4	splicing factor 3b subunit 4
ENSG00000089101	CFAP61	cilia and flagella associated protein 61	1.78378	0	1.9203	1.88167	2.70251	0	2.08522	0	0	0	0	0	0	0	0	0	1.48193	0	-1.48193	0.00240712	CFAP61	cilia and flagella associated protein 61
ENSG00000004799	PDK4	pyruvate dehydrogenase kinase 4	13.092	11.5898	11.8765	13.2354	10.6973	10.4216	11.2039	11.8202	10.4653	8.91944	10.0861	10.004	11.1716	11.4707	10.9414	10.6014	11.7309	10.6089	-1.12203	0.0024096	PDK4	pyruvate dehydrogenase kinase 4
ENSG00000095596	CYP26A1	cytochrome P450 family 26 subfamily A member 1	5.79614	8.28331	5.89447	6.63591	4.5259	6.32745	6.87974	12.5777	9.57175	7.65683	8.18357	7.51292	5.77951	8.78463	7.26384	8.48616	6.3347	8.4241	2.0894	0.00248266	CYP26A1	cytochrome P450 family 26 subfamily A member 1
ENSG00000166272	WBP1L	WW domain binding protein 1 like	11.0626	10.3141	10.7201	10.1921	10.4764	10.7645	11.1946	11.7537	10.9338	11.3067	11.0803	11.7837	11.6248	11.9744	11.3097	10.2099	10.6749	11.3308	0.655836	0.0024878	WBP1L	WW domain binding protein 1 like
ENSG00000261114	AC012181.2	---	4.57313	4.36128	3.48694	4.97408	5.04239	4.0967	5.27946	5.72435	4.98391	5.42071	5.02281	5.74145	6.72165	6.2854	4.96108	5.12011	4.54485	5.55349	1.00864	0.00250322	AC012181.2	---
ENSG00000167470	MIDN	midnolin	9.37491	9.17302	8.74784	10.3158	9.40652	9.03664	9.87231	11.9335	10.2131	9.88162	9.49101	10.0647	10.6027	12.4297	9.13729	9.35153	9.41815	10.345	0.926854	0.00256293	MIDN	midnolin
ENSG00000149809	TM7SF2	transmembrane 7 superfamily member 2	9.30047	8.94288	8.96708	8.06935	8.65922	11.2965	7.27166	8.41332	7.38806	8.60757	8.64061	8.4321	7.48689	8.40088	8.08407	8.00047	8.92959	8.16155	-0.768043	0.00256891	TM7SF2	transmembrane 7 superfamily member 2
ENSG00000163687	DNASE1L3	deoxyribonuclease 1 like 3	10.9714	11.3259	11.8758	13.6018	10.6516	11.9106	9.97662	8.22519	11.6768	11.2333	11.0839	10.1431	8.93326	9.85331	9.84554	10.2953	11.4734	10.1433	-1.33008	0.00258944	DNASE1L3	deoxyribonuclease 1 like 3
ENSG00000138411	HECW2	HECT, C2 and WW domain containing E3 ubiquitin protein ligase 2	7.56945	9.87228	9.28306	10.7774	8.93081	9.39367	9.37211	7.33305	8.11804	8.80939	9.41346	8.83839	8.93815	7.36632	7.96559	7.17258	9.31412	8.21722	-1.0969	0.00259866	HECW2	HECT, C2 and WW domain containing E3 ubiquitin protein ligase 2
ENSG00000167107	ACSF2	acyl-CoA synthetase family member 2	10.2079	10.8803	9.20579	9.06666	8.41098	10.0639	8.47854	7.63145	8.71712	7.92862	9.58062	8.36936	7.41857	8.74819	8.9739	9.05248	9.47345	8.49114	-0.982306	0.002642	ACSF2	acyl-CoA synthetase family member 2
ENSG00000140955	ADAD2	adenosine deaminase domain containing 2	2.74437	4.6527	0	2.6713	0	2.57451	0	0	0	0	0	0	0	0	0	0	1.80613	0	-1.80613	0.00264484	ADAD2	adenosine deaminase domain containing 2
ENSG00000145386	CCNA2	cyclin A2	5.56749	5.51907	5.44969	5.42845	7.7759	7.46729	5.72505	5.02201	4.27702	3.64438	6.54263	4.31468	4.94807	4.32193	4.60529	5.64154	6.13328	4.81306	-1.32022	0.00264657	CCNA2	cyclin A2
ENSG00000136770	DNAJC1	DnaJ heat shock protein family (Hsp40) member C1	10.509	10.8447	10.7952	10.4575	10.5869	10.802	10.9012	11.4973	11.0778	11.9019	10.3017	11.543	11.3809	11.6096	10.8493	10.8967	10.6995	11.2287	0.529194	0.00270676	DNAJC1	DnaJ heat shock protein family (Hsp40) member C1
ENSG00000268738	HSFX2	heat shock transcription factor family, X-linked 2	4.75818	2.48561	1.9203	3.3147	0	1.7984	2.67935	0	1.6055	0	0	1.63225	0	2	0	0	2.42236	0.581972	-1.84039	0.0027165	HSFX2	heat shock transcription factor family, X-linked 2
ENSG00000143761	ARF1	ADP ribosylation factor 1	10.887	12.4976	12.4319	12.7976	11.3117	12.6751	11.5182	13.5139	12.7244	13.1841	12.4696	12.6374	13.0586	13.6725	12.5567	12.8294	12.017	12.9607	0.94373	0.00273577	ARF1	ADP ribosylation factor 1
ENSG00000165105	RASEF	RAS and EF-hand domain containing	8.16831	7.85913	6.80055	7.60893	7.16129	7.79163	5.94354	7.50474	6.55392	5.92159	6.29686	7.05851	6.1435	6.20945	5.60447	6.46527	7.33334	6.41759	-0.915747	0.00274245	RASEF	RAS and EF-hand domain containing
ENSG00000186088	GSAP	gamma-secretase activating protein	9.17802	9.95485	9.28306	9.23039	9.6828	9.60585	9.34599	8.50812	9.32985	8.47815	9.24826	8.845	8.75911	9.02237	9.084	9.3308	9.46871	8.95618	-0.512525	0.00274782	GSAP	gamma-secretase activating protein
ENSG00000183527	PSMG1	proteasome assembly chaperone 1	9.36247	9.38144	9.1503	9.72432	9.90467	9.7928	9.50899	9.95699	10.0927	10.7832	9.25916	10.2314	10.5965	10.6092	9.7214	9.80661	9.54643	10.1175	0.571041	0.00276954	PSMG1	proteasome assembly chaperone 1
ENSG00000261241	LINC02128	long intergenic non-protein coding RNA 2128	5.0694	2.75508	5.10519	4.5469	4.77846	4.99906	6.86643	9.56024	3.61312	5.70729	6.164	7.34605	7.66848	7.76155	3.54816	5.38428	4.87436	6.30591	1.43155	0.00278399	LINC02128	long intergenic non-protein coding RNA 2128
ENSG00000136867	SLC31A2	solute carrier family 31 member 2	9.62007	9.44472	10.4387	8.22418	6.61418	9.2036	7.57954	7.96668	8.0695	7.46521	7.76127	7.58569	7.94595	7.56224	9.01787	7.95379	8.73215	7.92536	-0.806792	0.00280067	SLC31A2	solute carrier family 31 member 2
ENSG00000138029	HADHB	hydroxyacyl-CoA dehydrogenase/3-ketoacyl-CoA thiolase/enoyl-CoA hydratase (trifunctional protein), beta subunit	14.2971	13.6834	13.2474	12.3038	12.809	13.2017	12.6109	11.6414	12.1145	12.7305	12.6436	12.8587	11.8307	12.6974	12.8614	12.4383	13.1648	12.4241	-0.740694	0.00282713	HADHB	hydroxyacyl-CoA dehydrogenase/3-ketoacyl-CoA thiolase/enoyl-CoA hydratase (trifunctional protein), beta subunit
ENSG00000095380	NANS	N-acetylneuraminate synthase	9.83857	10.6886	10.4203	10.5098	10.0911	10.2024	10.7437	11.3126	10.8659	11.7956	9.75371	11.049	11.3934	11.9571	10.4048	10.802	10.3563	11.0371	0.680798	0.00283903	NANS	N-acetylneuraminate synthase
ENSG00000136383	ALPK3	alpha kinase 3	8.77056	8.03392	9.27227	8.16242	8.54043	8.44794	9.75807	11.996	9.75005	8.6495	9.41021	8.72483	10.547	10.2866	8.34363	9.44369	8.71223	9.6835	0.971267	0.00286717	ALPK3	alpha kinase 3
ENSG00000104529	EEF1D	eukaryotic translation elongation factor 1 delta	11.7521	11.8533	11.8542	12.0664	11.9657	11.5737	11.862	12.0962	12.4708	12.5958	11.6901	12.131	12.4947	12.1299	12.1048	12.4554	11.8468	12.241	0.39421	0.00288771	EEF1D	eukaryotic translation elongation factor 1 delta
ENSG00000125354	2020-09-06	septin 6	10.7429	10.5471	9.68727	9.92094	9.798	9.58272	9.68605	9.76608	8.76194	8.92255	9.93567	9.61331	9.08644	9.63481	9.22431	9.33341	9.995	9.36428	-0.630724	0.00289513	2020-09-06	septin 6
ENSG00000253767	PCDHGA8	protocadherin gamma subfamily A, 8	6.33653	5.81272	5.25299	5.09234	6.36699	5.58762	5.94354	5.9786	6.09633	6.61862	6.11685	7.18881	7.22413	6.32193	6.38654	7.41832	5.77039	6.59446	0.82407	0.00293418	PCDHGA8	protocadherin gamma subfamily A, 8
ENSG00000080573	COL5A3	collagen type V alpha 3 chain	9.82827	9.10233	9.45512	9.59338	7.73172	10.499	7.97006	7.96133	8.33438	6.73651	8.34913	9.07305	9.26047	7.36632	8.19834	7.97398	9.16855	8.13928	-1.02927	0.00294757	COL5A3	collagen type V alpha 3 chain
ENSG00000265735	RN7SL5P	RNA, 7SL, cytoplasmic 5, pseudogene	7.96702	8.14946	9.31496	8.57845	5.94492	7.02096	6.50358	7.08006	6.27822	5.79143	5.8926	6.35489	7.2868	7.55459	11.2579	6.87622	7.63991	7.15252	-0.487387	0.00294897	RN7SL5P	RNA, 7SL, cytoplasmic 5, pseudogene
ENSG00000157303	SUSD3	sushi domain containing 3	8.55943	8.0148	4.94049	7.10785	5.34579	7.62956	5.27946	5.56412	7.14942	3.96737	6.11685	4.76816	4.82678	5.16993	5.71544	6.02374	6.69677	5.47798	-1.21879	0.0029503	SUSD3	sushi domain containing 3
ENSG00000241592	AC021074.2	---	2.55742	3.77104	4.14651	1.88167	4.30245	3.27414	2.90435	0	1.6055	2.86299	2.2758	2.64384	0.871594	1.58496	1.96996	2.50056	3.26251	1.8128	-1.44971	0.00297518	AC021074.2	---
ENSG00000135549	PKIB	cAMP-dependent protein kinase inhibitor beta	5.29565	5.78289	5.59531	6.63591	6.47815	6.11175	5.99335	4.21711	4.67333	3.96737	5.83549	5.11268	4.64736	6.12928	4.54646	4.8557	5.98472	4.8872	-1.09752	0.0029951	PKIB	cAMP-dependent protein kinase inhibitor beta
ENSG00000084754	HADHA	hydroxyacyl-CoA dehydrogenase/3-ketoacyl-CoA thiolase/enoyl-CoA hydratase (trifunctional protein), alpha subunit	14.312	13.3821	13.5011	12.2172	12.9706	13.334	13.0422	12.2201	12.6088	12.9229	12.9144	13.0656	12.112	12.4597	12.8063	12.2207	13.2513	12.5923	-0.659037	0.00299873	HADHA	hydroxyacyl-CoA dehydrogenase/3-ketoacyl-CoA thiolase/enoyl-CoA hydratase (trifunctional protein), alpha subunit
ENSG00000276407	AC024559.2	---	3.31596	4.19003	2.71591	0	2.70251	1.7984	2.08522	0.945781	1.6055	0	0	2.05309	1.41108	0	0	0	2.40115	0.668384	-1.73276	0.00300716	AC024559.2	---
ENSG00000260729	AC009690.1	---	6.7831	5.55481	5.25299	5.88692	5.75193	4.94205	4.19363	4.75138	4.27702	3.51837	2.48831	4.52667	3.99406	1	4.7162	5.38428	5.48078	3.8507	-1.63008	0.00301879	AC009690.1	---
ENSG00000085662	AKR1B1	aldo-keto reductase family 1 member B	9.15759	8.55883	8.98305	10.101	8.37791	8.65281	8.50883	8.05977	8.67447	7.90363	8.60688	8.03588	7.98427	8.33092	8.71478	8.21924	8.90572	8.28109	-0.624629	0.00302168	AKR1B1	aldo-keto reductase family 1 member B
ENSG00000280987	MATR3	matrin 3	0.859513	2.15398	1.51434	3.7581	2.43495	1.16296	11.5398	7.72284	0	6.45627	4.8795	2.05309	1.41108	3.80735	4.54646	2.99794	3.34624	3.76384	0.417599	0.00305129	MATR3	matrin 3
ENSG00000141994	DUS3L	dihydrouridine synthase 3 like	7.09813	7.78584	7.28571	7.95952	8.05229	7.20185	7.12294	8.39359	8.42292	8.45253	7.39695	8.27959	7.81919	9.08746	8.05798	7.7581	7.50089	8.18537	0.684473	0.00306589	DUS3L	dihydrouridine synthase 3 like
ENSG00000140382	HMG20A	high mobility group 20A	9.97908	9.86696	9.68239	9.4289	9.63562	9.86551	9.70673	9.13993	9.41219	9.45478	9.70273	9.43221	9.04625	8.87652	9.11469	9.63336	9.73788	9.31252	-0.425367	0.0030661	HMG20A	high mobility group 20A
ENSG00000184378	ACTRT3	actin related protein T3	6.33653	6.00584	6.73919	4.79961	6.20405	6.03203	6.46878	7.26518	6.61534	7.36808	6.84226	7.62459	8.04897	7.97728	6.53009	4.9126	6.08372	7.02049	0.936771	0.00309414	ACTRT3	actin related protein T3
ENSG00000169715	MT1E	metallothionein 1E	11.8789	10.7534	12.2995	11.5585	11.5354	13.1139	13.0447	14.4548	13.1415	10.0994	12.1028	12.2734	14.3289	15.2106	13.1445	13.8103	12.0263	13.174	1.1477	0.00309878	MT1E	metallothionein 1E
ENSG00000139514	SLC7A1	solute carrier family 7 member 1	7.08953	6.1295	6.40175	8.23279	8.87773	6.99317	8.3265	9.80395	8.37045	8.99826	7.35015	9.47753	9.75329	10.4157	7.47573	7.11314	7.43585	8.75091	1.31506	0.00311473	SLC7A1	solute carrier family 7 member 1
ENSG00000117394	SLC2A1	solute carrier family 2 member 1	6.44839	6.34895	6.50857	7.50614	6.09199	5.43068	6.1553	7.98262	7.37923	7.05289	6.93579	6.60879	6.92249	8.23362	7.23619	7.08865	6.35572	7.27114	0.915425	0.00312754	SLC2A1	solute carrier family 2 member 1
ENSG00000176170	SPHK1	sphingosine kinase 1	4.88288	4.09613	5.21744	4.9324	5.59635	4.54257	6.52066	7.77867	6.23974	5.81842	5.12166	5.52824	6.61578	8.33985	5.89121	5.50019	5.11263	6.31486	1.20223	0.00315389	SPHK1	sphingosine kinase 1
ENSG00000115267	IFIH1	interferon induced with helicase C domain 1	10.0506	9.90899	9.49464	9.82598	9.77459	9.99903	9.59218	9.44227	9.20806	9.03899	9.8385	9.45828	9.47749	9.67948	9.15217	9.23923	9.80658	9.39272	-0.413857	0.00316162	IFIH1	interferon induced with helicase C domain 1
ENSG00000129595	EPB41L4A	erythrocyte membrane protein band 4.1 like 4A	8.70168	8.23456	8.23737	9.09291	7.06959	8.91228	6.53755	7.7603	7.39683	5.89648	8.03085	7.90296	6.61578	6.62936	7.15975	6.89046	8.11228	7.14253	-0.969748	0.00318014	EPB41L4A	erythrocyte membrane protein band 4.1 like 4A
ENSG00000162695	SLC30A7	solute carrier family 30 member 7	10.026	9.85088	10.2744	10.0025	10.5332	10.2354	10.7059	10.8517	10.591	11.3894	9.75628	11.1578	11.2548	11.5565	10.6198	10.4183	10.2326	10.844	0.611345	0.00318458	SLC30A7	solute carrier family 30 member 7
ENSG00000276293	PIP4K2B	phosphatidylinositol-5-phosphate 4-kinase type 2 beta	10.3132	10.5326	10.5828	10.2684	10.2431	10.6198	9.76705	9.97834	10.0778	9.8752	10.2679	9.89207	9.75051	9.57554	10.0273	10.0207	10.3324	9.94059	-0.391842	0.00320055	PIP4K2B	phosphatidylinositol-5-phosphate 4-kinase type 2 beta
ENSG00000258429	PDF	peptide deformylase (mitochondrial)	7.98568	8.05903	7.82392	7.27557	7.86042	8.02229	8.73798	8.55861	8.43148	9.46762	7.92077	8.9861	8.61085	9.49386	8.11982	8.46253	7.96641	8.6724	0.705991	0.00321892	PDF	peptide deformylase (mitochondrial)
ENSG00000256612	CYP2B7P	cytochrome P450 family 2 subfamily B member 7, pseudogene	7.51268	9.43276	5.32158	6.54203	5.62884	8.29696	5.10916	6.08084	6.60023	6.80558	6.22457	5.52824	4.26701	5.97728	5.71544	6.44613	6.83486	5.96059	-0.874267	0.00323482	CYP2B7P	cytochrome P450 family 2 subfamily B member 7, pseudogene
ENSG00000115616	SLC9A2	solute carrier family 9 member A2	2.74437	3.99569	3.80702	2.45286	0	3.60318	2.08522	0	0	0	2.02649	0	0	0	0.980041	2.50056	2.66977	0.611899	-2.05787	0.00328722	SLC9A2	solute carrier family 9 member A2
ENSG00000266173	STRADA	STE20-related kinase adaptor alpha	8.35572	8.30446	7.85896	8.21985	8.36351	8.31391	8.3265	7.67787	7.36142	8.1989	7.94796	8.15226	7.7816	7.91289	7.6947	7.29534	8.24899	7.78033	-0.46866	0.00329566	STRADA	STE20-related kinase adaptor alpha
ENSG00000073464	CLCN4	chloride voltage-gated channel 4	9.20615	8.96961	8.96975	7.95952	8.08192	8.05627	8.0779	7.46747	8.22041	8.07008	7.86954	7.29873	7.70336	7.58496	8.30866	8.14401	8.47444	7.85191	-0.622531	0.00332132	CLCN4	chloride voltage-gated channel 4
ENSG00000279186	FP236315.2	---	5.29565	5.00247	3.89967	2.19535	3.44848	4.38036	2.67935	3.48395	1.6055	2.0488	2.48831	3.76551	2.57969	2.32193	1.96996	3.1943	3.84305	2.60644	-1.23661	0.00333051	FP236315.2	---
ENSG00000279967	FP671120.2	---	5.29565	5.00247	3.89967	2.19535	3.44848	4.38036	2.67935	3.48395	1.6055	2.0488	2.48831	3.76551	2.57969	2.32193	1.96996	3.1943	3.84305	2.60644	-1.23661	0.00333051	FP671120.2	---
ENSG00000279303	CU634019.3	---	5.29565	5.00247	3.89967	2.19535	3.44848	4.38036	2.67935	3.48395	1.6055	2.0488	2.48831	3.76551	2.57969	2.32193	1.96996	3.1943	3.84305	2.60644	-1.23661	0.00333051	CU634019.3	---
ENSG00000125459	MSTO1	misato 1, mitochondrial distribution and morphology regulator	7.53185	8.805	7.88185	8.35218	8.95664	8.20302	8.53008	9.12565	9.39697	10.1706	8.13312	9.1119	9.64383	9.85798	8.20786	8.36906	8.32295	9.11299	0.790046	0.00333531	MSTO1	misato 1, mitochondrial distribution and morphology regulator
ENSG00000111665	CDCA3	cell division cycle associated 3	4.92217	5.32575	5.44969	4.84525	5.99563	6.30501	3.27039	4.21711	2.34653	4.14844	4.76183	4.45941	4.78397	3.45943	4.20987	4.37858	5.15913	4.08502	-1.07411	0.00339175	CDCA3	cell division cycle associated 3
ENSG00000105609	LILRB5	leukocyte immunoglobulin like receptor B5	9.10948	9.46834	10.1514	10.5535	9.17036	9.42261	9.74541	7.56948	9.06681	8.61912	9.25191	9.91735	8.26282	7.22882	8.9024	8.51859	9.66015	8.59303	-1.06711	0.0034026	LILRB5	leukocyte immunoglobulin like receptor B5
ENSG00000104938	CLEC4M	C-type lectin domain family 4 member M	9.39948	9.8634	10.5758	11.2673	8.76166	10.1514	8.79528	8.63455	7.88231	9.75288	9.11664	9.57012	8.1868	9.43254	7.82416	9.35153	9.83062	8.86128	-0.969344	0.00344564	CLEC4M	C-type lectin domain family 4 member M
ENSG00000280060	AL512506.2	---	3.81053	4.58518	4.35721	3.65936	5.1803	3.60318	5.53629	4.75138	4.48874	6.19308	5.15316	6.02346	6.83083	4.75489	5.71544	5.97114	4.39029	5.54246	1.15216	0.0034587	AL512506.2	---
ENSG00000137265	IRF4	interferon regulatory factor 4	5.56749	4.2782	5.35469	7.6023	6.53068	6.28222	6.37793	9.05204	7.04168	6.85855	6.96271	6.52902	7.53931	8.59991	6.60407	6.87622	5.99907	7.34039	1.34132	0.00346269	IRF4	interferon regulatory factor 4
ENSG00000143845	ETNK2	ethanolamine kinase 2	13.5752	12.4709	11.3751	9.66511	8.96302	12.1009	9.21826	10.35	9.40786	8.31716	11.5029	9.21745	7.9264	9.59991	10.4547	10.0527	11.0526	9.64768	-1.40496	0.00346675	ETNK2	ethanolamine kinase 2
ENSG00000132768	DPH2	DPH2 homolog	8.20062	8.36611	7.5937	7.87953	8.28923	8.33621	8.47854	9.77526	7.95538	9.69216	8.09713	9.30866	8.93326	9.42206	8.11476	8.33304	8.16342	8.84797	0.684549	0.00348357	DPH2	DPH2 homolog
ENSG00000272509	AC087752.4	---	0	0	0	0	0	0	0	0	3.48736	0	0.822554	2.05309	2.36413	1	1.96996	2.99794	0	1.63278	1.63278	0.00350271	AC087752.4	---
ENSG00000119431	HDHD3	haloacid dehalogenase like hydrolase domain containing 3	9.96974	10.0904	9.82948	9.01768	9.13404	10.0112	9.32425	9.27116	8.76871	8.41324	9.17918	8.81167	8.75911	8.47573	8.86377	9.90978	9.62526	8.93915	-0.686107	0.00358079	HDHD3	haloacid dehalogenase like hydrolase domain containing 3
ENSG00000180817	PPA1	pyrophosphatase (inorganic) 1	11.7646	12.0493	12.141	11.1704	11.9673	12.0579	11.8387	12.8806	11.791	13.0332	11.918	13.2367	12.6104	13.4611	11.9784	11.8031	11.8556	12.5236	0.668017	0.00358318	PPA1	pyrophosphatase (inorganic) 1
ENSG00000155287	SLC25A28	solute carrier family 25 member 28	9.24539	9.59389	9.41644	9.55269	9.45035	9.39897	9.22088	10.0929	9.64168	10.4484	9.3037	9.94681	9.91328	11.0063	9.73793	9.45571	9.41123	9.94963	0.5384	0.00361449	SLC25A28	solute carrier family 25 member 28
ENSG00000133943	C14orf159	chromosome 14 open reading frame 159	9.77428	9.77146	8.73218	9.14401	9.07632	9.51347	8.90672	8.27349	8.269	8.64574	9.54544	8.6701	8.19091	8.76487	8.35653	8.88842	9.27406	8.62272	-0.651341	0.00361516	C14orf159	chromosome 14 open reading frame 159
ENSG00000072315	TRPC5	transient receptor potential cation channel subfamily C member 5	6.64904	7.07061	7.52991	3.93735	5.59635	5.05391	4.56705	2.90374	4.42156	3.22758	5.73499	4.31468	5.32175	2	4.81919	5.46258	5.77203	4.24512	-1.52691	0.00373413	TRPC5	transient receptor potential cation channel subfamily C member 5
ENSG00000147439	BIN3	bridging integrator 3	8.02681	8.28863	8.35657	8.21116	7.89422	8.16615	8.47416	8.87266	8.25459	8.46112	8.31123	9.06459	8.66788	8.88874	8.56353	8.43367	8.20253	8.61311	0.410583	0.00374769	BIN3	bridging integrator 3
ENSG00000052795	FNIP2	folliculin interacting protein 2	10.8901	10.4778	10.9622	10.6674	11.1136	11.3733	11.3705	11.6684	11.7207	11.6341	11.1816	11.5241	12.4209	11.9091	11.011	10.9831	10.9793	11.5615	0.582173	0.00374959	FNIP2	folliculin interacting protein 2
ENSG00000134897	BIVM	basic, immunoglobulin-like variable motif containing	10.0562	9.74657	9.49093	7.05056	9.17312	10.0216	9.32668	8.70027	8.28798	8.42645	8.70844	9.33938	8.73683	7.99435	8.52977	8.5094	9.26651	8.58143	-0.685079	0.00378457	BIVM	basic, immunoglobulin-like variable motif containing
ENSG00000110218	PANX1	pannexin 1	8.90654	8.79008	8.97774	8.17588	8.8811	8.8439	9.54702	10.8567	8.99353	9.18871	8.6978	9.87765	9.8263	11.043	9.31301	8.90954	8.87461	9.63403	0.759424	0.0038378	PANX1	pannexin 1
ENSG00000135437	RDH5	retinol dehydrogenase 5	7.93377	7.88744	7.21535	7.36445	7.3485	8.34723	7.03052	6.3985	6.88841	6.85855	7.57031	6.65461	6.47487	6.58496	6.96012	7.60252	7.58961	6.88809	-0.701514	0.00383963	RDH5	retinol dehydrogenase 5
ENSG00000234292	AC123595.1	---	1.39443	0	1.9203	0.922201	2.10621	0	2.41266	3.35928	0	3.22758	2.6735	4.76816	4.86835	4.52356	2.77297	0	1.25083	2.91038	1.65955	0.00385296	AC123595.1	---
ENSG00000273604	EPOP	elongin BC and polycomb repressive complex 2 associated protein	7.45358	6.91431	6.8936	7.05056	7.03365	7.13982	7.10038	8.22072	7.66716	8.10338	6.05149	8.00082	8.195	8.40088	7.54498	7.26288	7.0837	7.71637	0.63267	0.00385702	EPOP	elongin BC and polycomb repressive complex 2 associated protein
ENSG00000136271	DDX56	DEAD-box helicase 56	9.714	9.64867	9.80573	10.0163	9.87789	9.61271	9.56566	10.4603	10.1981	10.5323	9.70937	10.1683	10.3584	10.6393	9.71641	9.7972	9.74871	10.1755	0.426812	0.00387436	DDX56	DEAD-box helicase 56
ENSG00000253676	TAGLN2P1	transgelin 2 pseudogene 1	3.31596	1.72262	3.22575	3.85051	4.03792	3.98823	4.69299	4.93732	5.3875	5.76393	4.72037	5.19769	4.94807	5.20945	3.77007	2.99794	3.54771	4.77026	1.22255	0.00387565	TAGLN2P1	transgelin 2 pseudogene 1
ENSG00000077152	UBE2T	ubiquitin conjugating enzyme E2 T	6.57703	6.03144	5.91681	6.36537	7.26828	7.03466	5.50228	6.46051	6.07463	5.42071	5.32895	5.19769	5.51737	4.64386	5.63303	5.64154	6.38512	5.54648	-0.838648	0.00388241	UBE2T	ubiquitin conjugating enzyme E2 T
ENSG00000111199	TRPV4	transient receptor potential cation channel subfamily V member 4	8.96649	8.78633	9.74927	7.66726	6.94611	8.00151	7.36923	6.35018	7.60039	7.26395	7.89771	7.41867	6.73295	6.55459	8.32187	7.61971	8.21231	7.30667	-0.905647	0.00389123	TRPV4	transient receptor potential cation channel subfamily V member 4
ENSG00000164308	ERAP2	endoplasmic reticulum aminopeptidase 2	10.9501	6.46619	11.0986	11.7443	10.8956	10.2413	7.24106	9.61068	6.97296	9.36381	6.79312	9.78109	6.60353	9.11634	6.94881	6.3669	9.8053	7.95081	-1.8545	0.00389882	ERAP2	endoplasmic reticulum aminopeptidase 2
ENSG00000249456	AL731577.2	---	7.02784	5.51907	7.04326	4.84525	4.30245	5.88852	4.96679	4.53789	4.42156	4.64703	4.39107	5.31649	3.99406	4.39232	5.38702	0	5.65617	4.12083	-1.53534	0.00391589	AL731577.2	---
ENSG00000071462	BUD23	BUD23, rRNA methyltransferase and ribosome maturation factor	9.43895	9.27297	9.60195	10.0544	9.54276	9.59895	9.8522	10.6377	10.188	10.2207	9.46458	10.0885	10.0058	10.5147	9.82403	9.9306	9.62317	10.0972	0.474017	0.00392067	BUD23	BUD23, rRNA methyltransferase and ribosome maturation factor
ENSG00000138109	CYP2C9	cytochrome P450 family 2 subfamily C member 9	14.3679	15.1449	14.4559	12.0507	13.4311	14.5634	12.3764	11.8877	13.3899	12.3973	14.0424	12.2447	10.2066	11.1072	13.0195	13.0442	13.77	12.371	-1.39899	0.00394502	CYP2C9	cytochrome P450 family 2 subfamily C member 9
ENSG00000143179	UCK2	uridine-cytidine kinase 2	8.01777	7.32979	8.53325	8.27091	8.97571	8.54207	8.49593	9.01118	9.12339	9.56844	8.41232	9.27237	9.40519	10.4788	8.28636	8.25818	8.30935	9.09069	0.781343	0.00398678	UCK2	uridine-cytidine kinase 2
ENSG00000254154	AL359075.2	---	9.91115	10.6744	9.80274	8.27091	9.55761	10.4124	9.63007	7.67787	9.37716	8.38643	9.11464	8.02429	9.9621	7.94251	9.11975	9.17091	9.75133	8.75285	-0.998477	0.00406321	AL359075.2	---
ENSG00000168016	TRANK1	tetratricopeptide repeat and ankyrin repeat containing 1	9.93535	9.69745	10.7154	9.3618	9.70583	9.67964	9.14025	8.08459	8.99353	8.68293	9.93114	8.9375	8.90107	7.98299	9.40694	9.36942	9.74795	8.92112	-0.826829	0.00406975	TRANK1	tetratricopeptide repeat and ankyrin repeat containing 1
ENSG00000174327	SLC16A13	solute carrier family 16 member 13	10.106	8.54557	7.87045	6.34962	9.24037	10.3698	8.47416	6.04081	6.87592	7.90992	8.50984	8.42771	8.0262	5.39232	6.76752	8.71932	8.708	7.40773	-1.30028	0.00413818	SLC16A13	solute carrier family 16 member 13
ENSG00000163435	ELF3	E74 like ETS transcription factor 3	9.37137	10.8063	11.2952	10.3558	10.9064	10.1624	10.449	12.2165	10.8556	10.7344	10.382	11.741	11.5945	13.1567	10.4285	11.1705	10.4781	11.3644	0.886346	0.00417192	ELF3	E74 like ETS transcription factor 3
ENSG00000141298	SSH2	slingshot protein phosphatase 2	9.06191	8.79008	9.76013	9.71513	9.01618	9.36413	9.14025	8.40939	8.22535	8.73697	8.91549	9.05322	9.15942	8.64386	9.04999	8.65824	9.26397	8.76133	-0.502645	0.00427225	SSH2	slingshot protein phosphatase 2
ENSG00000102390	PBDC1	polysaccharide biosynthesis domain containing 1	8.98283	8.72882	8.70676	9.37741	9.23774	9.00567	9.07812	9.72562	9.60619	10.1875	8.83037	9.19695	9.59823	10.4336	9.53917	9.01074	9.01676	9.56981	0.55305	0.00428323	PBDC1	polysaccharide biosynthesis domain containing 1
ENSG00000124222	STX16	syntaxin 16	10.7781	10.5908	10.3347	10.6214	10.3035	10.1083	10.4025	10.6569	9.19051	8.27394	8.98498	9.50281	8.5799	9.45738	8.54487	10.6282	10.4485	9.31327	-1.13521	0.00430085	STX16	syntaxin 16
ENSG00000205364	MT1M	metallothionein 1M	8.98747	7.20038	10.8722	10.2173	7.53147	11.7574	10.0997	12.6686	10.9179	7.35892	10.7361	11.5915	13.2556	15.112	11.4661	11.5323	9.5237	11.6265	2.10284	0.00430651	MT1M	metallothionein 1M
ENSG00000197406	DIO3	iodothyronine deiodinase 3	0	0	0	4.01926	3.44848	3.87094	0	3.22282	6.07463	5.70729	3.81405	7.00054	5.02361	5.32193	2.96489	2.77058	1.61981	4.65559	3.03578	0.00430837	DIO3	iodothyronine deiodinase 3
ENSG00000049323	LTBP1	latent transforming growth factor beta binding protein 1	10.2069	10.5146	9.98691	11.1196	9.89468	10.0822	9.72343	8.81449	9.77381	9.20925	10.1932	8.1362	9.19049	9.67066	9.86071	9.87263	10.2183	9.41349	-0.80485	0.00430959	LTBP1	latent transforming growth factor beta binding protein 1
ENSG00000237892	KLF7-IT1	KLF7 intronic transcript 1	0	0	0	1.88167	0	1.16296	0	2.23417	1.6055	1.62842	1.72491	1.63225	1.41108	3.80735	2.28986	2.77058	0.434947	2.12268	1.68773	0.00431262	KLF7-IT1	KLF7 intronic transcript 1
ENSG00000138760	SCARB2	scavenger receptor class B member 2	13.8603	13.8734	13.8795	12.6022	12.9114	13.4018	13.6856	12.7363	12.8966	11.3303	13.363	13.181	13.0122	12.8929	12.0164	11.9728	13.4592	12.6002	-0.858976	0.00435715	SCARB2	scavenger receptor class B member 2
ENSG00000175538	KCNE3	potassium voltage-gated channel subfamily E regulatory subunit 3	7.86991	8.09588	7.96996	8.69208	7.81878	7.7086	7.99473	7.30797	7.28788	5.73589	8.09713	7.1679	6.8517	5.52356	7.13999	7.7581	8.02142	6.98557	-1.03585	0.00437268	KCNE3	potassium voltage-gated channel subfamily E regulatory subunit 3
ENSG00000144120	TMEM177	transmembrane protein 177	6.84574	7.62703	8.25062	6.79553	8.24799	6.66352	7.65886	7.41363	8.36152	8.61912	7.62188	8.92509	8.17443	8.10329	8.61096	8.98775	7.44133	8.31307	0.871746	0.00438278	TMEM177	transmembrane protein 177
ENSG00000051596	THOC3	THO complex 3	8.82339	8.24006	9.16204	8.51281	8.33917	8.9952	9.22349	9.2093	9.14177	9.58229	9.36216	9.57807	8.79458	9.09803	9.2078	9.51663	8.75659	9.27674	0.520144	0.00439342	THOC3	THO complex 3
ENSG00000171848	RRM2	ribonucleotide reductase regulatory subunit M2	4.47087	4.36128	4.85051	5.4872	9.10835	9.09664	3.80463	4.7009	4.27702	6.17231	6.63477	4.97497	4.86835	4.64386	6.00481	5.5726	5.88278	5.31662	-0.566163	0.00439865	RRM2	ribonucleotide reductase regulatory subunit M2
ENSG00000139239	AC078814.1	---	8.80249	9.3614	8.48921	9.35983	9.26383	8.87849	9.16219	9.20477	10.281	10.2582	8.94729	9.37404	9.57173	9.94691	9.31742	9.57947	9.04535	9.60897	0.563626	0.00443442	AC078814.1	---
ENSG00000185219	ZNF445	zinc finger protein 445	6.85592	7.88744	6.6217	7.27557	6.46021	6.16254	7.93862	6.19468	6.29708	6.12985	6.22457	6.74212	6.65194	6.52356	4.28377	4.67016	7.02886	5.96864	-1.06022	0.00444574	ZNF445	zinc finger protein 445
ENSG00000119922	IFIT2	interferon induced protein with tetratricopeptide repeats 2	9.96033	8.77122	9.22829	9.27275	9.22717	8.94892	8.42054	6.35018	8.27852	7.58006	9.24278	7.48782	7.39031	7.55459	9.16689	8.46253	9.11846	7.94596	-1.1725	0.00446612	IFIT2	interferon induced protein with tetratricopeptide repeats 2
ENSG00000082269	FAM135A	family with sequence similarity 135 member A	7.89481	7.72439	8.34426	8.33629	8.5447	8.09601	8.87385	9.38546	8.51845	8.45253	8.74766	9.21745	9.13621	9.17243	8.57093	8.33824	8.25919	8.83771	0.57852	0.00447348	FAM135A	family with sequence similarity 135 member A
ENSG00000259803	SLC22A31	solute carrier family 22 member 31	0	0	0	0	0	0	1.66096	2.49343	2.61058	2.0488	0	0	2.76719	3.16993	1.55829	3.78789	0.23728	2.04846	1.81118	0.00447786	SLC22A31	solute carrier family 22 member 31
ENSG00000072571	HMMR	hyaluronan mediated motility receptor	3.89193	5.10245	4.48232	5.67582	7.17235	8.22708	4.35477	3.07208	4.3511	3.38029	6.20966	0	3.99406	4.24793	3.96235	0	5.5581	3.24639	-2.31172	0.00447915	HMMR	hyaluronan mediated motility receptor
ENSG00000122642	FKBP9	FK506 binding protein 9	10.1768	10.1025	10.3614	10.2653	10.5149	9.96724	10.2986	9.09665	9.8933	10.128	9.69071	10.0787	9.86661	8.77808	9.78798	9.8234	10.241	9.68261	-0.558352	0.00448406	FKBP9	FK506 binding protein 9
ENSG00000278615	C11orf98	chromosome 11 open reading frame 98	8.43934	8.58067	7.53714	8.29578	8.50587	7.60222	7.4956	9.56024	8.50228	9.19902	7.88369	8.70682	8.98851	9.15987	8.82408	8.07713	8.06523	8.76685	0.701619	0.00452821	C11orf98	chromosome 11 open reading frame 98
ENSG00000055163	CYFIP2	cytoplasmic FMR1 interacting protein 2	12.1902	11.3566	9.70182	10.191	9.74526	10.337	9.32182	9.97966	10.5044	8.94415	9.46143	9.37404	9.35123	10.2336	9.71474	9.22526	10.4063	9.64317	-0.763086	0.00453288	CYFIP2	cytoplasmic FMR1 interacting protein 2
ENSG00000137496	IL18BP	interleukin 18 binding protein	7.52549	6.65915	7.44791	8.75321	9.56182	8.15991	9.05484	7.73543	8.7101	9.95338	8.92008	10.805	10.7413	9.81858	9.11469	8.66239	8.16605	9.38456	1.21851	0.00453346	IL18BP	interleukin 18 binding protein
ENSG00000160818	GPATCH4	G-patch domain containing 4	9.42363	9.56351	9.73205	9.28522	9.69436	10.0336	9.63204	11.2797	9.92851	10.5107	9.45828	10.7223	10.4164	10.9965	9.65508	9.23087	9.62348	10.2443	0.620771	0.00454533	GPATCH4	G-patch domain containing 4
ENSG00000122378	FAM213A	family with sequence similarity 213 member A	12.3273	11.6494	12.1285	10.7906	11.4259	12.4034	10.784	10.4518	10.7881	10.6193	11.5339	11.007	10.6286	10.7013	11.498	11.4838	11.6442	10.968	-0.676184	0.00462379	FAM213A	family with sequence similarity 213 member A
ENSG00000262294	AC129507.2	---	6.83548	4.2782	3.07497	4.75249	4.03792	4.75609	4.0122	2.49343	3.34958	4.454	2.98492	4.15378	3.99406	3.32193	2.28986	4.01274	4.53534	3.45048	-1.08486	0.00469672	AC129507.2	---
ENSG00000100314	CABP7	calcium binding protein 7	1.39443	2.15398	1.9203	1.88167	0	0	2.08522	0	0	0	0	0	0	0	4.66181	0	1.34794	0.517979	-0.829965	0.00471996	CABP7	calcium binding protein 7
ENSG00000280039	RN7SKP23	RNA, 7SK small nuclear pseudogene 23	0	0	0	0	2.10621	0	0	2.49343	2.61058	2.0488	0	2.64384	2.9331	1.58496	1.96996	2.77058	0.300888	2.11725	1.81636	0.00473214	RN7SKP23	RNA, 7SK small nuclear pseudogene 23
ENSG00000115361	ACADL	acyl-CoA dehydrogenase, long chain	10.0606	10.8909	9.67912	8.63151	9.28946	10.1748	8.34581	7.291	7.90708	8.88155	9.58062	8.31807	7.92147	8.82337	9.29078	9.42914	9.58173	8.60479	-0.976947	0.00478263	ACADL	acyl-CoA dehydrogenase, long chain
ENSG00000178104	PDE4DIP	phosphodiesterase 4D interacting protein	12.1401	12.4024	11.308	10.852	10.6377	11.5702	11.0141	10.6936	11.1082	10.7022	11.3388	11.0055	10.1738	10.1137	10.9147	10.9047	11.4178	10.7728	-0.644973	0.00480056	PDE4DIP	phosphodiesterase 4D interacting protein
ENSG00000171681	ATF7IP	activating transcription factor 7 interacting protein	9.29487	10.452	10.1144	10.632	10.3309	9.36142	9.33153	9.51164	9.43579	9.75288	9.65814	9.55005	8.70564	9.04166	9.37771	9.30447	9.93102	9.37089	-0.560136	0.00482549	ATF7IP	activating transcription factor 7 interacting protein
ENSG00000188153	COL4A5	collagen type IV alpha 5 chain	7.34213	6.81464	7.20631	7.49902	6.49587	7.92266	7.30163	3.89661	6.09633	5.31096	7.39695	5.71285	5.491	3.32193	6.98248	6.12352	7.22604	5.59251	-1.63352	0.00486846	COL4A5	collagen type IV alpha 5 chain
ENSG00000173041	ZNF680	zinc finger protein 680	9.24926	9.54142	8.82959	8.35218	8.69802	8.91968	8.5385	7.91225	8.2105	8.42645	8.26151	8.34627	8.15776	7.85175	8.86377	8.84888	8.87552	8.3199	-0.555617	0.00487619	ZNF680	zinc finger protein 680
ENSG00000121691	CAT	catalase	14.3363	14.4872	13.8485	12.5033	13.007	13.9651	12.8385	10.8128	11.9629	12.0728	13.8942	12.3635	11.3496	11.7356	13.4635	12.9187	13.5694	12.286	-1.28346	0.0049319	CAT	catalase
ENSG00000076043	REXO2	RNA exonuclease 2	9.80087	9.35634	9.33376	9.56979	9.70583	9.23361	9.68226	10.4374	9.39259	10.1374	9.71069	10.5672	9.63332	10.115	9.97247	9.84913	9.52607	9.97947	0.453406	0.00498909	REXO2	RNA exonuclease 2
ENSG00000213088	ACKR1	atypical chemokine receptor 1 (Duffy blood group)	1.39443	3.17812	3.36225	6.30132	4.88989	0	6.065	6.4756	8.13387	5.92159	6.10079	7.45366	7.48689	9.18488	6.13029	3.90469	3.59871	6.7547	3.15598	0.00500566	ACKR1	atypical chemokine receptor 1 (Duffy blood group)
ENSG00000101447	FAM83D	family with sequence similarity 83 member D	7.44686	8.94961	8.04287	6.48551	6.3476	5.94765	5.72505	4.64858	6.18001	5.19218	6.58944	4.97497	4.73986	6.42626	6.91433	6.95959	6.99216	5.84725	-1.14492	0.00502171	FAM83D	family with sequence similarity 83 member D
ENSG00000128052	KDR	kinase insert domain receptor	9.29487	11.7868	11.4574	12.8725	11.0897	11.2236	10.4994	9.32006	11.13	11.1213	11.2664	10.0245	9.55592	10.0196	9.81627	9.20547	11.1749	10.1622	-1.01272	0.00503157	KDR	kinase insert domain receptor
ENSG00000213553	RPLP0P6	ribosomal protein lateral stalk subunit P0 pseudogene 6	9.41849	9.81817	9.27011	9.28522	9.89635	9.22467	9.5942	9.81437	10.6978	10.817	9.51999	9.82183	10.0562	10.6751	9.70468	9.44851	9.50103	10.0617	0.560689	0.00503326	RPLP0P6	ribosomal protein lateral stalk subunit P0 pseudogene 6
ENSG00000083814	ZNF671	zinc finger protein 671	6.21526	6.26513	5.80147	7.57547	5.78114	6.74911	6.33992	5.5356	5.86305	5.79143	6.11685	5.27796	6.01983	4.85798	5.93773	5.67482	6.38964	5.67503	-0.714615	0.00503463	ZNF671	zinc finger protein 671
ENSG00000168172	HOOK3	hook microtubule tethering protein 3	10.3587	10.3754	10.2819	10.0075	9.95198	10.4841	10.0178	9.35925	9.49622	9.3661	9.93454	9.69233	10.084	9.5411	10.0042	10.2574	10.2111	9.74835	-0.4627	0.00505088	HOOK3	hook microtubule tethering protein 3
ENSG00000242193	AL359075.1	---	10.1625	8.87735	9.69375	9.34601	9.83153	9.87886	9.85894	7.43695	9.39478	8.79926	9.60929	8.4233	8.58302	7.50779	9.46765	9.1265	9.66413	8.7054	-0.958738	0.00507849	AL359075.1	---
ENSG00000242522	KLHL6-AS1	KLHL6 antisense RNA 1	6.61348	5.19596	4.65174	0	5.94492	5.62432	3.27039	0	4.19893	0	3.11858	2.64384	1.80284	2.32193	3.54816	4.67016	4.47154	2.47827	-1.99327	0.00512335	KLHL6-AS1	KLHL6 antisense RNA 1
ENSG00000186222	BLOC1S4	biogenesis of lysosomal organelles complex 1 subunit 4	7.29053	6.81464	6.88229	7.42581	7.13891	6.92124	7.0424	7.96133	7.58512	7.67171	7.04057	7.32731	7.52638	8.36194	7.10984	7.76584	7.07369	7.59445	0.520761	0.00514671	BLOC1S4	biogenesis of lysosomal organelles complex 1 subunit 4
ENSG00000123739	PLA2G12A	phospholipase A2 group XIIA	11.1619	10.1442	10.4242	10.0213	10.4573	10.6378	10.508	9.42682	9.94205	10.309	10.0942	10.0519	9.85243	10.1636	10.2499	10.1609	10.4792	10.0279	-0.451365	0.00516394	PLA2G12A	phospholipase A2 group XIIA
ENSG00000198901	PRC1	protein regulator of cytokinesis 1	4.75818	5.05333	5.93881	6.58301	8.36832	8.2151	5.96866	5.5065	5.31532	5.76393	6.61228	4.52667	5.35137	6.06609	5.54561	5.67482	6.4122	5.59584	-0.816358	0.00516801	PRC1	protein regulator of cytokinesis 1
ENSG00000128951	DUT	deoxyuridine triphosphatase	9.17599	9.22663	8.55834	8.92774	9.07041	9.02639	8.08366	8.54794	8.05848	8.18342	8.56651	8.31807	8.55147	8.43463	8.63233	8.64989	8.86702	8.43808	-0.428942	0.00520677	DUT	deoxyuridine triphosphatase
ENSG00000064115	TM7SF3	transmembrane 7 superfamily member 3	11.2192	11.5632	10.3766	10.0496	10.3173	10.4765	10.1582	10.2449	9.96877	10.2582	10.56	10.2465	9.26242	9.57932	10.0083	9.32819	10.5944	9.93962	-0.654748	0.00522033	TM7SF3	transmembrane 7 superfamily member 3
ENSG00000103005	USB1	U6 snRNA biogenesis phosphodiesterase 1	9.89643	9.58312	9.37064	9.07147	9.56392	9.62182	9.80765	11.0538	9.81202	10.3933	9.3739	10.4966	10.389	10.5038	9.82713	9.30977	9.55929	10.1288	0.569525	0.00526791	USB1	U6 snRNA biogenesis phosphodiesterase 1
ENSG00000255974	CYP2A6	cytochrome P450 family 2 subfamily A member 6	12.4104	13.2591	9.12653	11.4089	8.07604	11.9975	8.68969	10.3581	9.32756	10.9086	8.22121	10.3522	6.83083	8.39232	10.0657	6.5751	10.7098	9.00353	-1.70623	0.00528135	CYP2A6	cytochrome P450 family 2 subfamily A member 6
ENSG00000102897	LYRM1	LYR motif containing 1	9.72654	10.7697	10.4203	8.40266	9.3246	10.3273	9.42299	8.45199	8.81198	9.47824	9.14433	9.61331	9.50411	8.85487	9.4028	8.8157	9.77058	9.1197	-0.650875	0.00533048	LYRM1	LYR motif containing 1
ENSG00000167232	ZNF91	zinc finger protein 91	9.44739	9.57878	8.88163	8.80897	8.72832	9.17296	9.05777	8.83219	8.34801	8.07569	8.89001	8.62861	8.75634	8.0607	8.68441	9.03336	9.09655	8.58992	-0.506623	0.00535182	ZNF91	zinc finger protein 91
ENSG00000116649	SRM	spermidine synthase	9.28737	9.43756	9.17136	9.31188	9.77822	9.5663	9.46773	10.3074	10.2118	10.7397	8.89001	10.1644	10.1707	10.6511	9.38193	9.36433	9.43149	9.98681	0.555325	0.00536938	SRM	spermidine synthase
ENSG00000225921	NOL7	nucleolar protein 7	9.41849	9.63204	9.46841	10.2346	9.9407	9.74776	10.0505	10.5352	10.2462	10.8053	9.62201	10.2761	10.2136	10.7432	9.84096	10.2491	9.78464	10.2813	0.496653	0.00538314	NOL7	nucleolar protein 7
ENSG00000248590	GLDCP1	glycine decarboxylase pseudogene 1	6.16702	7.50444	6.91595	4.60111	4.45519	6.8141	5.69525	5.31838	5.19977	5.70729	5.87381	5.02235	4.26701	5.70044	4.04966	4.7347	6.02187	5.09705	-0.924821	0.00538569	GLDCP1	glycine decarboxylase pseudogene 1
ENSG00000143570	SLC39A1	solute carrier family 39 member 1	11.2344	11.1733	11.2293	10.282	11.3111	11.1987	9.97352	11.6089	11.4321	11.7643	11.1021	11.8821	11.9386	11.7052	11.2024	11.2643	10.9146	11.5444	0.629838	0.00540014	SLC39A1	solute carrier family 39 member 1
ENSG00000269153	LYPLA2P2	lysophospholipase II pseudogene 2	0	0	1.51434	0	1.07167	0	0	2.23417	1.6055	2.37392	0	1.63225	2.36413	3.32193	1.55829	2.50056	0.36943	1.95453	1.5851	0.00541659	LYPLA2P2	lysophospholipase II pseudogene 2
ENSG00000263740	RN7SL4P	RNA, 7SL, cytoplasmic 4, pseudogene	7.84457	7.5316	9.11692	7.92805	5.22348	6.62781	5.66483	6.77306	5.27782	5.06272	5.05652	5.68367	6.71026	7.2854	10.9704	6.42673	7.1339	6.58295	-0.550947	0.00545932	RN7SL4P	RNA, 7SL, cytoplasmic 4, pseudogene
ENSG00000171503	ETFDH	electron transfer flavoprotein dehydrogenase	13.6612	12.7595	12.7946	10.9453	11.9905	12.8356	12.3458	10.9796	11.0758	11.925	12.504	12.2437	11.3133	11.6036	12.1347	11.6712	12.4761	11.7168	-0.759289	0.00549227	ETFDH	electron transfer flavoprotein dehydrogenase
ENSG00000150656	CNDP1	carnosine dipeptidase 1	10.5074	10.3603	10.004	8.64125	8.32932	8.93802	8.92929	7.91779	9.20806	9.2067	9.28783	8.27471	7.48689	7.9542	8.6464	8.87416	9.38707	8.53964	-0.847435	0.0055091	CNDP1	carnosine dipeptidase 1
ENSG00000166128	RAB8B	RAB8B, member RAS oncogene family	9.38549	9.68541	10.0157	10.4118	9.98373	9.6421	10.1999	9.24497	9.55617	6.84549	7.46128	7.85796	9.74494	8.73132	9.60371	9.27764	9.90345	8.70261	-1.20084	0.00557289	RAB8B	RAB8B, member RAS oncogene family
ENSG00000143977	SNRPG	small nuclear ribonucleoprotein polypeptide G	9.59295	9.95151	9.4703	9.5126	9.70392	9.61271	9.59823	10.2775	10.0655	10.4655	9.12659	10.0519	10.2671	10.3421	9.66721	10.3696	9.6346	10.0703	0.435728	0.00557529	SNRPG	small nuclear ribonucleoprotein polypeptide G
ENSG00000225067	RPL23AP2	ribosomal protein L23a pseudogene 2	6.13394	6.24339	5.89447	6.44162	6.44204	6.39273	6.76969	6.61845	7.69588	7.73682	6.20966	6.95243	6.86203	6.97728	6.54519	6.83266	6.33113	6.93671	0.605585	0.00557755	RPL23AP2	ribosomal protein L23a pseudogene 2
ENSG00000004139	SARM1	sterile alpha and TIR motif containing 1	7.42651	8.38112	7.31123	7.55502	8.50587	7.5837	8.42962	6.38257	6.07463	8.05881	7.51682	7.47084	5.56871	6.55459	7.04757	4.6026	7.88472	6.58635	-1.29837	0.0055794	SARM1	sterile alpha and TIR motif containing 1
ENSG00000270392	PFN1P2	profilin 1 pseudogene 2	7.59398	3.99569	2.23676	0.922201	5.1803	3.44802	4.75207	3.89661	2.34653	2.0488	1.34316	4.59094	3.45368	4.16993	0.980041	2.50056	4.01843	2.81447	-1.20396	0.00559917	PFN1P2	profilin 1 pseudogene 2
ENSG00000170631	ZNF16	zinc finger protein 16	6.88603	6.48484	5.72757	6.38094	6.76796	7.00713	6.55425	7.12861	7.36142	7.44803	6.94482	7.11424	7.01793	7.49185	6.70165	6.80287	6.5441	7.11238	0.568278	0.00560894	ZNF16	zinc finger protein 16
ENSG00000163959	SLC51A	solute carrier family 51 alpha subunit	7.84967	8.35094	9.00667	8.11664	9.91458	8.58925	8.93568	10.0469	9.81529	9.37522	9.50938	9.84837	9.32347	10.4625	7.74135	10.0963	8.68049	9.57987	0.899378	0.00561205	SLC51A	solute carrier family 51 alpha subunit
ENSG00000272689	AC004832.4	---	6.36532	5.51907	2.23676	3.65936	1.67975	3.07639	3.27039	2.90374	2.61058	2.37392	2.6735	2.37849	2.57969	3	1.55829	4.29544	3.68672	2.70818	-0.978536	0.00561601	AC004832.4	---
ENSG00000152254	G6PC2	glucose-6-phosphatase catalytic subunit 2	4.24164	2.15398	0	0	2.70251	1.7984	0	0	0	0	0	0	0	0	0	0	1.55665	0	-1.55665	0.00564944	G6PC2	glucose-6-phosphatase catalytic subunit 2
ENSG00000139626	ITGB7	integrin subunit beta 7	7.2292	8.15529	7.35279	8.27925	6.95895	7.66522	6.24028	5.31838	6.91308	6.33067	7.30879	6.02346	6.42001	5.20945	7.01539	7.2519	7.41157	6.42124	-0.990334	0.0056567	ITGB7	integrin subunit beta 7
ENSG00000185485	SDHAP1	succinate dehydrogenase complex flavoprotein subunit A pseudogene 1	8.00868	8.00191	7.68114	8.80031	8.31441	7.78354	7.74136	8.40939	8.50634	8.3499	8.08494	8.50896	8.68252	8.77479	9.10453	9.04931	8.04733	8.60785	0.560519	0.00569398	SDHAP1	succinate dehydrogenase complex flavoprotein subunit A pseudogene 1
ENSG00000185043	CIB1	calcium and integrin binding 1	11.1731	10.5382	10.559	10.7818	10.781	10.4032	10.7327	11.4498	11.2162	11.0013	10.2064	11.2955	11.5926	12.2592	11.0426	11.2388	10.7099	11.2558	0.545954	0.00569466	CIB1	calcium and integrin binding 1
ENSG00000089022	MAPKAPK5	mitogen-activated protein kinase-activated protein kinase 5	9.21012	9.49847	9.24163	9.30169	9.36614	9.26591	9.33878	10.1434	9.55225	9.86391	9.20946	9.47541	9.65872	10.0265	9.56903	9.50742	9.31753	9.66735	0.349812	0.00574989	MAPKAPK5	mitogen-activated protein kinase-activated protein kinase 5
ENSG00000134324	LPIN1	lipin 1	10.9092	11.5817	11.6609	9.19116	10.251	12.6388	10.3473	10.596	9.68708	10.3161	10.4977	10.1918	10.2456	10.0196	10.8225	10.4318	10.94	10.312	-0.627997	0.00576901	LPIN1	lipin 1
ENSG00000185010	F8	coagulation factor VIII	9.96033	10.8302	11.0451	11.7884	10.2484	10.598	10.9813	8.53359	10.5977	9.37975	10.7367	10.4966	9.40342	10.0634	10.121	9.99129	10.7788	9.92482	-0.853983	0.00577321	F8	coagulation factor VIII
ENSG00000151364	KCTD14	potassium channel tetramerization domain containing 14	8.91386	8.16689	7.25973	7.61553	8.2739	8.04277	8.66301	8.36955	9.22047	9.21941	8.96958	9.67391	9.20881	9.75822	7.61822	8.15584	8.13367	8.91044	0.776774	0.00580671	KCTD14	potassium channel tetramerization domain containing 14
ENSG00000171121	KCNMB3	potassium calcium-activated channel subfamily M regulatory beta subunit 3	5.29565	5.00247	5.06574	5.57108	6.53068	5.51128	5.91797	8.73518	6.11771	4.454	5.83549	6.06929	7.38316	6.35755	5.93773	7.27378	5.55641	6.46266	0.906247	0.00582204	KCNMB3	potassium calcium-activated channel subfamily M regulatory beta subunit 3
ENSG00000165271	NOL6	nucleolar protein 6	9.13687	9.06254	9.18523	9.82455	9.49289	9.71623	9.55534	10.518	10.1008	10.6125	9.44084	10.3265	9.84594	10.7515	9.51253	8.95087	9.42481	10.0066	0.581806	0.00582542	NOL6	nucleolar protein 6
ENSG00000179387	ELMOD2	ELMO domain containing 2	10.1387	9.76194	9.28736	9.24961	9.83676	9.69913	9.77062	9.41316	9.40351	9.5117	9.3435	9.26501	9.15313	9.39017	9.18869	9.40951	9.67773	9.34204	-0.335691	0.00584013	ELMOD2	ELMO domain containing 2
ENSG00000105401	CDC37	cell division cycle 37	10.6399	10.51	10.3827	10.7492	10.6477	10.3576	10.4951	11.3873	11.0398	11.2087	10.427	10.794	10.6682	11.0077	10.6261	11.0184	10.5403	10.9086	0.368261	0.00585281	CDC37	cell division cycle 37
ENSG00000178596	GAPDHP29	glyceraldehyde 3 phosphate dehydrogenase pseudogene 29	0	2.15398	1.9203	0	2.70251	1.16296	1.66096	0	0	0	0	0	0	0	0	0	1.37153	0	-1.37153	0.00587926	GAPDHP29	glyceraldehyde 3 phosphate dehydrogenase pseudogene 29
ENSG00000133321	RARRES3	retinoic acid receptor responder 3	9.87782	9.41829	9.9235	10.1921	10.3949	10.6401	9.06653	10.4717	9.26186	10.4	10.8383	11.7343	11.2044	10.5584	10.6843	10.8719	9.93046	10.6695	0.739019	0.00589623	RARRES3	retinoic acid receptor responder 3
ENSG00000143333	RGS16	regulator of G protein signaling 16	5.10398	6.3891	6.30343	7.74154	7.5904	6.30501	6.83945	6.63198	8.08043	6.55585	6.26838	8.26489	9.89076	8.85487	8.71144	5.73915	6.61042	7.66642	1.056	0.00590967	RGS16	regulator of G protein signaling 16
ENSG00000009765	IYD	iodotyrosine deiodinase	9.1617	10.9782	8.38889	7.77729	8.57002	8.99169	7.52977	7.01955	8.66724	7.9348	9.23176	7.33671	4.69435	6.97728	7.15975	7.87007	8.77108	7.43239	-1.33869	0.00593799	IYD	iodotyrosine deiodinase
ENSG00000249096	LINC02362	long intergenic non-protein coding RNA 2362	11.0817	10.9441	9.5582	8.08845	8.45694	9.60814	8.94203	7.51208	8.16501	8.15193	9.50023	8.28931	9.06425	8.77149	8.42752	9.80473	9.52565	8.63184	-0.893812	0.00593985	LINC02362	long intergenic non-protein coding RNA 2362
ENSG00000125817	CENPB	centromere protein B	9.78631	10.2115	10.192	10.1186	10.0117	10.1963	10.0695	11.0953	10.1599	10.8145	10.3122	10.7392	10.372	11.0327	10.1197	10.0093	10.0837	10.5172	0.433508	0.00596341	CENPB	centromere protein B
ENSG00000237949	LINC00844	long intergenic non-protein coding RNA 844	9.05087	10.1354	5.75263	7.25881	5.38436	8.29126	4.56705	4.28722	7.46515	6.19308	6.77299	5.39058	3.08188	5.85798	7.05813	6.53941	7.20576	5.8496	-1.35616	0.00600558	LINC00844	long intergenic non-protein coding RNA 844
ENSG00000168884	TNIP2	TNFAIP3 interacting protein 2	9.02404	8.97621	9.10724	8.82898	8.78347	8.84	9.34359	9.84666	9.20806	9.04472	9.00238	9.73028	9.43662	9.72451	9.39865	9.11442	8.98622	9.38959	0.40337	0.00605566	TNIP2	TNFAIP3 interacting protein 2
ENSG00000196187	TMEM63A	transmembrane protein 63A	10.9454	11.0386	10.8346	10.1092	10.0467	10.3535	10.9093	9.75839	10.5145	10.4645	10.3927	9.76899	9.56385	8.42626	10.0178	9.76858	10.6053	9.85285	-0.752484	0.00606489	TMEM63A	transmembrane protein 63A
ENSG00000161800	RACGAP1	Rac GTPase activating protein 1	6.84574	7.09509	7.2771	7.26721	7.65492	7.72559	6.853	6.95639	6.48978	6.10814	7.22233	6.83792	6.62794	5.55459	6.92591	5.88845	7.24552	6.51238	-0.733139	0.00607605	RACGAP1	Rac GTPase activating protein 1
ENSG00000151640	DPYSL4	dihydropyrimidinase like 4	0	0	0	1.88167	0	0	0	2.71312	0	1.62842	2.48831	3.38541	2.57969	2.32193	3.66337	0	0.26881	2.08669	1.81788	0.00608511	DPYSL4	dihydropyrimidinase like 4
ENSG00000241923	RPL14P3	ribosomal protein L14 pseudogene 3	3.72426	4.09613	3.07497	3.55337	3.83009	3.87094	3.80463	4.06574	5.11726	5.23287	4.22314	4.59094	3.99406	4.70044	4.04966	4.37858	3.70777	4.48363	0.775861	0.00608887	RPL14P3	ribosomal protein L14 pseudogene 3
ENSG00000123219	CENPK	centromere protein K	2.09008	2.98205	2.90658	6.09012	6.82515	6.53447	3.27039	2.23417	3.83588	3.38029	5.12166	3.23264	3.34007	3	3.86941	3.3671	4.38555	3.4868	-0.898747	0.00608909	CENPK	centromere protein K
ENSG00000113318	MSH3	mutS homolog 3	8.92599	8.91909	8.82074	8.64125	8.86073	9.12253	9.06653	8.14721	8.96727	8.712	8.72426	8.23503	8.55783	7.6865	8.49129	8.12607	8.90812	8.40528	-0.502846	0.00609603	MSH3	mutS homolog 3
ENSG00000166349	RAG1	recombination activating 1	6.04776	6.52143	5.89447	5.79689	5.04239	5.82687	5.86543	4.47919	6.03022	3.38029	5.92945	4.59094	4.44242	4.08746	4.81919	4.29544	5.85646	4.67273	-1.18373	0.00609776	RAG1	recombination activating 1
ENSG00000196090	PTPRT	protein tyrosine phosphatase, receptor type T	5.68634	4.89503	6.4175	5.3672	3.44848	5.47154	5.46746	4.53789	3.02689	2.86299	4.03304	3.06176	3.34007	5.52356	4.54646	4.79647	5.25051	3.9699	-1.2806	0.00611023	PTPRT	protein tyrosine phosphatase, receptor type T
ENSG00000204852	TCTN1	tectonic family member 1	7.9576	8.42039	7.85896	8.30397	8.08778	7.98749	7.53818	7.61791	7.48173	7.26395	7.89305	7.8316	7.49355	7.9542	7.48359	7.29534	8.02205	7.59054	-0.431508	0.00611715	TCTN1	tectonic family member 1
ENSG00000162409	PRKAA2	protein kinase AMP-activated catalytic subunit alpha 2	8.43255	7.29851	8.20142	6.30132	7.26828	7.06168	7.64334	6.44525	5.07417	7.25409	6.81298	6.60879	7.13326	6.14975	7.0262	7.03841	7.45816	6.61588	-0.842281	0.00615738	PRKAA2	protein kinase AMP-activated catalytic subunit alpha 2
ENSG00000163686	ABHD6	abhydrolase domain containing 6	10.4531	10.4293	10.3254	8.92774	9.71531	10.7469	10.0163	10.2327	9.23276	9.59209	9.81038	9.66274	9.07094	9.04985	9.44971	9.3541	10.0877	9.49503	-0.592688	0.00621586	ABHD6	abhydrolase domain containing 6
ENSG00000187514	PTMA	prothymosin, alpha	12.7999	13.7378	13.2323	13.4674	13.4471	13.0377	13.0047	13.765	13.6534	14.0371	13.0569	13.7652	14.1601	14.5933	13.4317	13.7079	13.2467	13.7967	0.550023	0.006219	PTMA	prothymosin, alpha
ENSG00000128228	SDF2L1	stromal cell derived factor 2 like 1	8.63822	9.99118	8.1171	9.22824	8.90119	8.3798	9.27223	9.92984	9.91177	10.7798	8.68977	9.48389	10.0471	10.2408	8.63586	10.0948	8.93257	9.75707	0.824507	0.00621961	SDF2L1	stromal cell derived factor 2 like 1
ENSG00000100344	PNPLA3	patatin like phospholipase domain containing 3	8.96883	8.78633	9.00667	7.49186	8.52757	10.9567	7.8736	7.91779	7.68875	7.70101	8.60118	7.26957	7.41857	9.01402	7.90248	8.62457	8.80165	8.01533	-0.786317	0.00622826	PNPLA3	patatin like phospholipase domain containing 3
ENSG00000119523	ALG2	ALG2, alpha-1,3/1,6-mannosyltransferase	9.85389	10.7735	9.19669	10.641	10.4985	10.6645	10.5811	11.0475	10.7458	11.3197	10.3669	11.1229	11.2602	11.6457	10.5635	10.7678	10.3156	10.9822	0.666615	0.0062518	ALG2	ALG2, alpha-1,3/1,6-mannosyltransferase
ENSG00000111816	FRK	fyn related Src family tyrosine kinase	11.0947	10.7839	10.4339	8.75021	10.1829	10.2705	9.98434	9.62936	9.50638	9.43093	9.92431	10.1578	8.76737	9.53138	9.55977	9.91327	10.2143	9.60228	-0.612061	0.00626638	FRK	fyn related Src family tyrosine kinase
ENSG00000137642	SORL1	sortilin related receptor 1	12.0199	12.4453	11.1336	10.8309	11.6106	11.4112	12.2305	11.0329	10.9555	11.7638	11.6637	10.4113	10.9662	10.8273	10.9278	10.6535	11.6688	11.0224	-0.646413	0.00630337	SORL1	sortilin related receptor 1
ENSG00000177459	ERICH5	glutamate rich 5	9.42534	8.34074	8.13627	8.0837	8.44331	8.77619	8.03096	7.82065	8.316	7.55621	7.62188	6.91526	6.78814	8.01123	8.41113	8.09568	8.46236	7.72624	-0.736118	0.00636016	ERICH5	glutamate rich 5
ENSG00000182566	CLEC4G	C-type lectin domain family 4 member G	9.40642	10.0919	10.6326	11.7499	9.54276	10.1671	9.31693	9.10153	8.84441	9.78573	9.81038	10.001	8.98851	9.83763	8.80851	9.71361	10.1297	9.43237	-0.697284	0.00637463	CLEC4G	C-type lectin domain family 4 member G
ENSG00000107537	PHYH	phytanoyl-CoA 2-hydroxylase	12.4582	12.9319	12.5729	11.9789	11.3518	12.3693	11.41	11.3278	11.0607	11.3037	12.1251	11.8753	10.1285	11.2848	11.3316	12.0576	12.1533	11.3883	-0.764943	0.00640182	PHYH	phytanoyl-CoA 2-hydroxylase
ENSG00000137145	DENND4C	DENN domain containing 4C	9.92693	10.0266	10.4046	10.5396	9.8506	10.1388	10.0666	9.40924	10.0887	9.67565	10.1645	9.69416	9.03944	8.83289	9.82558	9.41936	10.1363	9.57216	-0.56409	0.00641438	DENND4C	DENN domain containing 4C
ENSG00000182326	C1S	complement C1s	16.4061	16.3841	16.9961	14.6048	15.9726	16.1711	16.3993	14.7888	15.0742	15.3961	16.1846	16.092	15.0605	15.4552	15.517	15.0326	16.1335	15.4001	-0.733355	0.00642224	C1S	complement C1s
ENSG00000242125	SNHG3	small nucleolar RNA host gene 3	7.82398	7.54054	7.30277	8.70761	7.91413	8.13469	7.78444	9.66929	8.75854	8.29811	6.87096	8.64383	9.31222	9.53916	8.02065	8.48616	7.88688	8.6221	0.735223	0.00644406	SNHG3	small nucleolar RNA host gene 3
ENSG00000104825	NFKBIB	NFKB inhibitor beta	8.95232	8.84884	9.32334	8.70142	8.82962	8.72641	9.40929	9.57783	9.04186	9.17833	8.62384	9.82851	10.6248	10.0307	8.97111	10.245	8.97018	9.56911	0.59893	0.00644862	NFKBIB	NFKB inhibitor beta
ENSG00000105835	NAMPT	nicotinamide phosphoribosyltransferase	14.0332	13.6619	14.3234	13.7405	13.9578	14.7722	14.5541	15.95	14.3727	14.959	14.3197	15.1768	15.772	16.8796	14.2492	12.763	14.149	14.938	0.788962	0.00645482	NAMPT	nicotinamide phosphoribosyltransferase
ENSG00000136908	DPM2	dolichyl-phosphate mannosyltransferase subunit 2, regulatory	8.57492	8.44441	8.05802	8.63476	8.43873	8.27981	8.65142	10.0855	8.67447	8.72276	8.52798	9.22506	8.89857	9.48784	8.11982	9.13549	8.4403	8.98639	0.546095	0.00647376	DPM2	dolichyl-phosphate mannosyltransferase subunit 2, regulatory
ENSG00000261740	BOLA2-SMG1P6	BOLA2-SMG1P6 readthrough	6.95394	6.50325	6.5377	7.24185	7.66279	7.52667	7.00646	8.25174	7.80534	7.92241	7.22233	7.98895	7.01793	7.83289	7.23619	7.90554	7.06181	7.68704	0.625229	0.00648475	BOLA2-SMG1P6	BOLA2-SMG1P6 readthrough
ENSG00000179846	NKPD1	NTPase KAP family P-loop domain containing 1	1.78378	2.15398	2.23676	1.88167	0	0	2.08522	0.945781	0	0	0	0	0	0	0	0	1.44877	0.105087	-1.34369	0.00652054	NKPD1	NTPase KAP family P-loop domain containing 1
ENSG00000179403	VWA1	von Willebrand factor A domain containing 1	10.3086	9.62575	10.839	10.5492	11.321	11.1516	11.223	11.1679	10.6445	11.5769	11.3029	12.172	11.8092	11.6142	11.0897	11.4756	10.7169	11.4281	0.711238	0.00652265	VWA1	von Willebrand factor A domain containing 1
ENSG00000068438	FTSJ1	FtsJ RNA methyltransferase homolog 1 (E. coli)	7.58177	8.35601	8.07799	8.65412	8.26359	8.22111	8.29705	8.9638	8.77209	9.55847	8.04771	9.28214	8.62607	9.94251	8.17426	8.08953	8.20738	8.82851	0.621131	0.00661783	FTSJ1	FtsJ RNA methyltransferase homolog 1 (E. coli)
ENSG00000197208	SLC22A4	solute carrier family 22 member 4	3.89193	4.09613	4.48232	3.65936	4.5259	3.60318	5.35762	5.77403	5.27782	4.70603	4.03304	6.09168	6.12647	5.9542	4.7162	4.20722	4.23092	5.20963	0.97871	0.00664996	SLC22A4	solute carrier family 22 member 4
ENSG00000154928	EPHB1	EPH receptor B1	8.07988	8.15529	5.93881	6.66164	3.71375	7.55547	4.69299	5.7494	6.29708	3.05677	5.8926	2.05309	2.36413	5.52356	5.91466	5.83057	6.39969	4.74243	-1.65726	0.00665382	EPHB1	EPH receptor B1
ENSG00000115687	PASK	PAS domain containing serine/threonine kinase	7.46026	6.79983	7.17885	7.6221	7.03365	6.21161	5.91797	6.06096	5.73055	6.23375	6.32479	5.6539	6.74415	5	6.76752	6.46527	6.88918	6.10899	-0.78019	0.00669832	PASK	PAS domain containing serine/threonine kinase
ENSG00000163866	SMIM12	small integral membrane protein 12	8.8893	8.84524	8.92085	8.97726	8.89786	10.2265	9.10102	10.9703	10.439	10.2029	8.85931	9.65524	9.90457	10.5897	9.21961	9.03976	9.12257	9.8756	0.753028	0.00670709	SMIM12	small integral membrane protein 12
ENSG00000124831	LRRFIP1	LRR binding FLII interacting protein 1	11.2533	11.0996	12.2068	11.4584	11.6368	11.2473	12.199	12.0405	11.911	12.3892	11.793	12.691	12.1273	12.8305	12.2495	11.7098	11.5859	12.1935	0.607667	0.00672711	LRRFIP1	LRR binding FLII interacting protein 1
ENSG00000114742	WDR48	WD repeat domain 48	10.1262	10.1974	10.4693	9.92891	9.78183	9.7928	9.95635	9.94076	9.34579	9.74586	9.71069	9.71053	9.45037	9.20457	10.0644	9.42181	10.0361	9.62165	-0.414463	0.00673721	WDR48	WD repeat domain 48
ENSG00000184083	FAM120C	family with sequence similarity 120C	8.10571	8.13773	7.50063	7.48467	7.61493	7.7086	7.68941	6.92374	7.11793	7.43936	7.57031	7.39187	7.2161	6.42626	7.66736	7.31658	7.74881	7.22995	-0.518865	0.00673866	FAM120C	family with sequence similarity 120C
ENSG00000215580	BCORP1	BCL6 corepressor pseudogene 1	2.55742	3.3507	1.9203	5.33558	0	2.23802	2.67935	0	0	0	2.2758	2.05309	0	0	1.55829	2.16809	2.58305	0.895031	-1.68802	0.00674361	BCORP1	BCL6 corepressor pseudogene 1
ENSG00000145014	TMEM44	transmembrane protein 44	6.95394	6.59193	6.23395	7.87404	5.80976	7.28444	7.03052	6.04081	6.4566	5.84491	6.20966	6.33626	6.28837	6.26679	6.11012	6.64392	6.82551	6.24416	-0.581349	0.00676908	TMEM44	transmembrane protein 44
ENSG00000267629	AC138430.1	---	6.97277	7.95587	3.98673	7.52027	5.45854	7.23782	5.96866	4.80016	6.63029	5.19218	6.23932	4.59094	5.3804	3.58496	4.86805	6.3256	6.44295	5.29021	-1.15274	0.00677112	AC138430.1	---
ENSG00000079459	FDFT1	farnesyl-diphosphate farnesyltransferase 1	11.5297	10.7065	11.9796	10.0761	11.6019	13.8657	10.0476	11.031	9.9194	10.6571	10.7567	10.4377	10.7427	11.2906	10.4696	11.5289	11.401	10.7593	-0.641721	0.00677605	FDFT1	farnesyl-diphosphate farnesyltransferase 1
ENSG00000200087	SNORA73B	small nucleolar RNA, H/ACA box 73B	2.74437	2.98205	1.9203	4.01926	2.10621	3.27414	1.66096	3.98365	3.93556	3.96737	2.2758	3.64959	4.38629	4.58496	4.81919	3.66079	2.67247	3.91813	1.24566	0.00678037	SNORA73B	small nucleolar RNA, H/ACA box 73B
ENSG00000182810	DDX28	DEAD-box helicase 28	7.64183	7.6684	8.01725	7.56187	7.98486	8.20302	7.82628	8.07471	8.10204	9.32904	8.21749	8.33224	8.31261	9.47776	8.18394	7.70271	7.84336	8.41473	0.57137	0.00682217	DDX28	DEAD-box helicase 28
ENSG00000144649	FAM198A	family with sequence similarity 198 member A	7.98104	7.57576	6.98101	8.25831	8.21092	7.47736	8.84021	8.38162	7.4399	8.86869	8.26872	8.87434	9.87045	9.41785	8.86075	8.35886	7.90352	8.70458	0.801061	0.00691835	FAM198A	family with sequence similarity 198 member A
ENSG00000169612	FAM103A1	family with sequence similarity 103 member A1	8.90898	8.95964	8.92911	8.77989	8.8811	8.71369	8.81965	9.00859	8.98773	9.2886	8.92693	9.11463	8.8885	9.40088	9.18146	9.37955	8.85601	9.13076	0.274752	0.00692613	FAM103A1	family with sequence similarity 103 member A1
ENSG00000122035	RASL11A	RAS like family 11 member A	7.41967	6.9815	7.36909	7.56187	6.83911	7.78354	7.10038	8.16128	7.33428	7.77176	7.26621	9.10366	7.97002	9.60363	7.33509	7.37848	7.29359	7.9916	0.698007	0.00693674	RASL11A	RAS like family 11 member A
ENSG00000160256	FAM207A	family with sequence similarity 207 member A	7.72193	8.04024	7.55861	7.47018	7.80463	7.53633	7.45173	8.76621	7.70297	8.55638	7.61624	8.45387	8.37883	8.62936	7.72817	7.60252	7.65481	8.15939	0.504586	0.00694361	FAM207A	family with sequence similarity 207 member A
ENSG00000136997	MYC	MYC proto-oncogene, bHLH transcription factor	7.44686	7.85197	6.70108	6.81859	9.75265	8.71794	9.12636	9.17503	10.1274	9.97753	8.46033	7.70665	10.6973	10.9285	9.24989	8.15584	8.05935	9.38649	1.32715	0.00697252	MYC	MYC proto-oncogene, bHLH transcription factor
ENSG00000198680	TUSC1	tumor suppressor candidate 1	7.6061	7.92206	7.7134	7.57547	7.22643	7.60222	7.34064	7.67133	7.48995	7.98926	7.02363	8.18386	8.8885	9.22641	8.53734	8.4955	7.56947	8.16731	0.597833	0.00698306	TUSC1	tumor suppressor candidate 1
ENSG00000186198	SLC51B	solute carrier family 51 beta subunit	5.38271	2.98205	2.49613	4.30707	5.38436	0	5.27946	7.11903	4.83696	6.15124	5.15316	5.99998	5.73525	7.5157	3.2858	5.99768	3.69026	5.75498	2.06472	0.00705512	SLC51B	solute carrier family 51 beta subunit
ENSG00000266970	AC061992.1	---	2.90985	1.72262	3.48694	1.88167	3.12318	3.60318	3.42361	3.22282	2.61058	3.22758	4.09923	6.29827	5.46413	3.16993	5.24625	2.50056	2.87872	3.98215	1.10343	0.00705978	AC061992.1	---
ENSG00000187942	LDLRAD2	low density lipoprotein receptor class A domain containing 2	4.88288	0	5.02519	6.64883	2.43495	0	0	2.71312	2.61058	2.0488	1.34316	0	2.57969	1.58496	2.55154	2.77058	2.71312	2.02249	-0.69063	0.00712061	LDLRAD2	low density lipoprotein receptor class A domain containing 2
ENSG00000196743	GM2A	GM2 ganglioside activator	10.7082	10.0518	10.0247	10.3359	10.2896	10.6198	9.87065	8.93132	9.75176	9.06458	10.4729	9.5997	9.16569	10.0647	9.96266	9.69142	10.2715	9.63387	-0.637658	0.00715175	GM2A	GM2 ganglioside activator
ENSG00000154252	GAL3ST2	galactose-3-O-sulfotransferase 2	2.34259	3.64406	0	1.88167	2.10621	0	0	0	0	0	0	0	0	0	0	0	1.42493	0	-1.42493	0.00716289	GAL3ST2	galactose-3-O-sulfotransferase 2
ENSG00000197444	OGDHL	oxoglutarate dehydrogenase like	11.2866	11.1762	10.6292	9.77678	10.872	11.1834	10.8293	9.33462	8.71361	9.60184	10.8594	10.1697	9.59359	9.74315	10.7247	10.7336	10.8219	9.94157	-0.880357	0.00718458	OGDHL	oxoglutarate dehydrogenase like
ENSG00000161649	CD300LG	CD300 molecule like family member g	6.79373	3.3507	4.65174	6.1819	0	4.82078	3.42361	2.90374	4.27702	4.76271	2.02649	0	1.80284	2	1.96996	3.52141	4.17464	2.58491	-1.58973	0.00719443	CD300LG	CD300 molecule like family member g
ENSG00000142273	CBLC	Cbl proto-oncogene C	6.53963	6.0813	7.17885	6.62286	7.57381	5.79502	7.67422	6.51996	8.0362	7.43936	7.39695	8.14157	7.2558	8.37504	7.79287	7.96728	6.78081	7.65834	0.877526	0.00719595	CBLC	Cbl proto-oncogene C
ENSG00000178896	EXOSC4	exosome component 4	7.41967	7.47676	7.04326	7.04079	6.76796	6.69837	7.47821	8.26048	7.48173	7.61896	7.06562	8.14157	7.53286	8.29462	7.34375	7.43783	7.13215	7.68638	0.554234	0.0072014	EXOSC4	exosome component 4
ENSG00000118894	EEF2KMT	eukaryotic elongation factor 2 lysine methyltransferase	8.32308	7.86626	7.68114	8.30805	8.02813	8.06964	8.32163	8.92858	8.66361	9.08972	7.98782	9.06175	8.25891	9.06609	8.02065	8.1965	8.08542	8.58596	0.500542	0.00723576	EEF2KMT	eukaryotic elongation factor 2 lysine methyltransferase
ENSG00000172828	CES3	carboxylesterase 3	10.9322	9.75043	8.84715	8.52688	8.30941	9.82272	7.31148	6.78523	7.94346	7.02998	9.43765	8.73553	4.94807	8.01681	8.60376	8.1965	9.07147	7.74411	-1.32736	0.0072542	CES3	carboxylesterase 3
ENSG00000113790	EHHADH	enoyl-CoA hydratase and 3-hydroxyacyl CoA dehydrogenase	14.0959	14.0951	13.3973	12.2694	12.0206	14.1082	11.8552	10.782	12.1928	11.168	13.044	11.3129	10.8109	11.1491	13.2657	13.129	13.1203	11.8727	-1.24755	0.00726029	EHHADH	enoyl-CoA hydratase and 3-hydroxyacyl CoA dehydrogenase
ENSG00000188060	RAB42	RAB42, member RAS oncogene family	4.62166	4.83816	6.08408	5.57108	6.26733	6.55363	6.065	4.80016	4.48874	4.8698	5.46067	5.15581	3.55899	4.39232	5.7419	2.99794	5.71442	4.60737	-1.10705	0.00727718	RAB42	RAB42, member RAS oncogene family
ENSG00000173120	KDM2A	lysine demethylase 2A	11.0038	11.0721	11.7386	11.26	10.9047	11.1437	11.0103	10.8386	10.4952	10.8872	10.8783	10.9484	10.9805	10.3276	10.7911	10.9504	11.1619	10.7886	-0.373309	0.00728788	KDM2A	lysine demethylase 2A
ENSG00000094916	CBX5	chromobox 5	10.2394	10.7554	10.6326	9.69657	10.4974	10.5076	10.0623	9.95564	9.9041	9.85417	9.90246	10.0099	10.007	9.68124	10.007	10.3543	10.3416	9.96397	-0.377617	0.00730043	CBX5	chromobox 5
ENSG00000100056	ESS2	ess-2 splicing factor homolog	7.33487	7.65199	7.13187	7.80643	7.26828	7.26132	7.14514	8.4558	7.50626	7.92862	7.70924	7.87742	7.92147	8.59619	7.41125	7.48549	7.37141	7.87686	0.505444	0.00732252	ESS2	ess-2 splicing factor homolog
ENSG00000177508	IRX3	iroquois homeobox 3	6.01179	0	5.82529	4.75249	2.70251	3.98823	4.96679	6.41425	4.02879	7.32168	5.96539	6.09168	7.57113	4.32193	6.60407	6.84733	4.0353	6.12958	2.09428	0.00734021	IRX3	iroquois homeobox 3
ENSG00000138135	CH25H	cholesterol 25-hydroxylase	2.55742	2.98205	5.38705	6.19958	7.10467	5.91839	6.19842	7.09967	3.93556	6.40377	7.51076	8.1994	9.85631	7.9542	7.34375	5.60748	5.19251	7.10121	1.9087	0.00735175	CH25H	cholesterol 25-hydroxylase
ENSG00000110243	APOA5	apolipoprotein A5	12.9762	12.717	11.488	11.8435	10.107	11.5952	10.8404	10.7256	10.7398	10.9242	10.8534	10.8517	11.0005	10.5718	11.6389	11.7013	11.6525	11.0008	-0.65173	0.00735335	APOA5	apolipoprotein A5
ENSG00000168140	VASN	vasorin	8.42573	8.63176	8.53686	8.62498	9.01925	8.40639	9.35077	9.50981	8.34801	9.44399	9.0945	9.70691	9.17193	9.92184	8.61454	9.68327	8.71368	9.2772	0.56352	0.00735806	VASN	vasorin
ENSG00000204390	HSPA1L	heat shock protein family A (Hsp70) member 1 like	8.08854	7.95587	6.19792	6.10895	4.6577	5.66012	6.11085	6.28313	4.67333	3.64438	5.3011	5.46105	4.78397	6	4.7162	6.69347	6.39714	5.28407	-1.11307	0.00735941	HSPA1L	heat shock protein family A (Hsp70) member 1 like
ENSG00000279010	AL031587.6	---	6.57703	6.955	6.58031	6.62286	5.72213	9.78674	6.58706	7.64486	7.60039	6.64901	6.72138	10.1944	7.14177	10.0715	7.03692	7.6618	6.97588	7.858	0.882126	0.00740074	AL031587.6	---
ENSG00000111785	RIC8B	RIC8 guanine nucleotide exchange factor B	8.55943	8.23456	8.46288	8.77695	8.19473	7.98749	8.53008	8.62103	7.79874	7.31221	8.00086	7.47084	7.80855	7.73471	8.22672	7.07625	8.3923	7.78332	-0.608979	0.0074158	RIC8B	RIC8 guanine nucleotide exchange factor B
ENSG00000167165	UGT1A6	UDP glucuronosyltransferase family 1 member A6	11.0877	11.8524	10.1828	8.17588	9.24037	10.2604	9.28228	9.93668	9.39259	9.31015	9.55136	10.2175	8.3461	7.72792	8.94002	9.01724	10.0117	9.15995	-0.851737	0.00744469	UGT1A6	UDP glucuronosyltransferase family 1 member A6
ENSG00000164128	NPY1R	neuropeptide Y receptor Y1	7.9576	9.68339	9.55108	10.6082	7.8258	9.14165	8.46977	6.79729	8.14952	7.97133	8.71109	7.69938	8.83708	6.49185	8.76402	8.9711	9.03393	8.04363	-0.990303	0.00745304	NPY1R	neuropeptide Y receptor Y1
ENSG00000139291	TMEM19	transmembrane protein 19	9.87782	9.79594	10.0362	8.37958	9.37574	9.87315	8.73066	7.84991	9.69065	8.8161	8.97179	8.998	8.55465	7.82018	8.97669	8.50015	9.43844	8.68646	-0.751985	0.0074591	TMEM19	transmembrane protein 19
ENSG00000250575	AL732372.3	---	3.42936	2.48561	3.07497	4.09677	3.5872	2.23802	3.09895	4.14341	3.93556	3.76027	3.55575	3.97267	4.59879	5.61471	4.13199	3.90469	3.14441	4.17976	1.03535	0.00746498	AL732372.3	---
ENSG00000140332	TLE3	transducin like enhancer of split 3	7.26784	7.75544	8.56189	8.50216	7.43372	7.60222	8.50024	10.7208	7.69588	8.70479	8.4853	7.92182	8.82657	10.5915	7.6465	8.05835	7.94622	8.73906	0.792845	0.00748186	TLE3	transducin like enhancer of split 3
ENSG00000164035	EMCN	endomucin	8.25932	8.79756	9.22606	10.492	8.57836	9.51835	9.97352	7.12861	9.09673	8.61912	9.20759	8.5048	7.6267	7.3837	9.12729	8.40916	9.2636	8.34485	-0.918743	0.00750469	EMCN	endomucin
ENSG00000162618	ADGRL4	adhesion G protein-coupled receptor L4	9.25119	9.95986	10.2504	11.6894	10.0691	9.73942	10.8598	9.29475	10.1208	10.1836	9.75884	10.0404	9.03488	9.61102	9.33055	8.70731	10.2599	9.56468	-0.6952	0.00756847	ADGRL4	adhesion G protein-coupled receptor L4
ENSG00000196329	GIMAP5	GTPase, IMAP family member 5	8.11845	9.3308	9.4965	10.1104	9.3924	9.02639	9.28729	7.91225	8.08043	7.94708	8.55181	9.20724	8.72274	8.20457	9.53917	8.30675	9.25175	8.49689	-0.754853	0.00758753	GIMAP5	GTPase, IMAP family member 5
ENSG00000275464	FP565260.1	---	7.69383	7.58443	7.51535	7.99031	7.97225	8.26825	8.21018	8.36144	8.269	8.48658	7.90698	8.61708	8.28601	8.81057	7.83649	8.52773	7.89066	8.34465	0.453994	0.0076319	FP565260.1	---
ENSG00000180879	SSR4	signal sequence receptor subunit 4	11.3987	11.4131	11.0413	11.3394	11.3699	11.342	11.7676	11.4111	11.5305	11.7428	11.3307	11.8084	12.2407	12.0921	11.7903	12.728	11.3817	11.8528	0.471048	0.00771215	SSR4	signal sequence receptor subunit 4
ENSG00000100575	TIMM9	translocase of inner mitochondrial membrane 9	7.77117	7.73222	7.77584	8.15338	8.02813	7.89288	8.29208	8.59016	7.97894	8.76152	7.79661	8.54591	8.54186	8.81057	8.11476	8.26365	7.94939	8.37822	0.428834	0.00771901	TIMM9	translocase of inner mitochondrial membrane 9
ENSG00000236698	EIF1AXP1	eukaryotic translation initiation factor 1A, X-linked pseudogene 1	4.62166	5.24053	5.44969	5.23631	4.77846	5.54995	5.19682	5.61953	5.31532	6.3118	5.69274	5.85048	5.84344	6.24793	5.51526	5.34347	5.15335	5.74889	0.595539	0.00773041	EIF1AXP1	eukaryotic translation initiation factor 1A, X-linked pseudogene 1
ENSG00000196482	ESRRG	estrogen related receptor gamma	6.01179	4.6527	3.60171	5.51571	3.83009	6.89143	2.90435	2.90374	3.61312	0	4.49307	0	1.80284	0	4.48514	4.20722	4.77254	2.38946	-2.38308	0.00773937	ESRRG	estrogen related receptor gamma
ENSG00000253626	EIF5AL1	eukaryotic translation initiation factor 5A-like 1	6.72875	6.69161	6.38582	6.69941	7.4245	7.39479	6.96959	7.7165	7.47346	8.56835	6.43141	7.56983	7.59609	8.00562	6.83052	7.73462	6.89921	7.54738	0.648169	0.00776493	EIF5AL1	eukaryotic translation initiation factor 5A-like 1
ENSG00000114767	RRP9	ribosomal RNA processing 9, U3 small nucleolar RNA binding protein	7.44011	7.73222	7.47074	7.74154	7.73172	8.02915	7.57954	8.59362	8.24491	8.66445	7.73028	8.40107	8.05349	8.76487	7.6465	7.38854	7.675	8.1653	0.490302	0.00777337	RRP9	ribosomal RNA processing 9, U3 small nucleolar RNA binding protein
ENSG00000223656	HMGB3P10	high mobility group box 3 pseudogene 10	0	1.72262	3.07497	2.6713	2.70251	2.57451	2.67935	1.91789	0	0	1.34316	1.63225	0	0	0	0	2.20361	0.5437	-1.65991	0.00779517	HMGB3P10	high mobility group box 3 pseudogene 10
ENSG00000106244	PDAP1	PDGFA associated protein 1	10.7271	11.0251	11.0124	10.9629	11.0438	11.0782	11.0164	11.1755	11.4046	11.7577	10.9213	11.3517	11.4027	11.6555	11.0865	11.0473	10.9808	11.3114	0.330599	0.00779893	PDAP1	PDGFA associated protein 1
ENSG00000059588	TARBP1	TAR (HIV-1) RNA binding protein 1	9.07286	9.02799	8.34837	9.23682	9.23774	9.14481	8.36958	7.73543	9.32066	8.58417	8.41558	8.05878	8.21124	7.40939	8.08923	8.14993	8.91974	8.21938	-0.700359	0.00780141	TARBP1	TAR (HIV-1) RNA binding protein 1
ENSG00000149100	EIF3M	eukaryotic translation initiation factor 3 subunit M	10.8576	10.9065	10.5447	11.0646	11.2366	10.9629	10.9374	11.7652	11.3132	11.8312	10.8413	11.1951	11.3845	12.0583	10.8742	11.1646	10.9301	11.3809	0.450795	0.0078513	EIF3M	eukaryotic translation initiation factor 3 subunit M
ENSG00000227117	HORMAD2-AS1	HORMAD2 and MTMR3 antisense RNA 1	9.53869	9.02481	7.36096	7.89588	5.52909	7.03466	5.39517	6.13888	7.38806	5.55515	6.97157	5.68367	6.1435	7.24793	4.76861	7.73462	7.39704	6.40356	-0.993482	0.00792612	HORMAD2-AS1	HORMAD2 and MTMR3 antisense RNA 1
ENSG00000228649	SNHG26	small nucleolar RNA host gene 26	3.42936	4.51433	4.22021	5.05399	5.49424	3.98823	5.01582	4.80016	6.11771	7.1517	4.09923	4.38886	6.37745	5.88264	5.28275	5.67482	4.53089	5.53059	0.999705	0.00796322	SNHG26	small nucleolar RNA host gene 26
ENSG00000273611	ZNHIT3	zinc finger HIT-type containing 3	8.61443	8.85244	8.526	8.50927	8.88447	8.67922	8.51737	9.07947	8.97607	9.12798	8.83037	9.01567	8.75911	8.77149	9.10453	8.73911	8.65474	8.93376	0.279013	0.00803338	ZNHIT3	zinc finger HIT-type containing 3
ENSG00000231181	AL954705.1	---	1.39443	3.17812	0	0	2.10621	1.16296	2.08522	2.71312	4.02879	2.63908	2.98492	3.38541	3.83541	1.58496	2.28986	3.78789	1.41814	3.02772	1.60958	0.00803968	AL954705.1	---
ENSG00000169499	PLEKHA2	pleckstrin homology domain containing A2	8.8643	8.86317	9.48346	10.1462	9.13969	8.91228	9.47871	8.22072	8.8087	8.35452	9.28071	8.36936	7.7816	8.52356	9.39449	8.69924	9.26968	8.60366	-0.666025	0.0080673	PLEKHA2	pleckstrin homology domain containing A2
ENSG00000006327	TNFRSF12A	TNF receptor superfamily member 12A	8.4761	8.27797	7.44022	8.8682	8.98828	6.99317	9.42979	11.536	9.7449	9.87841	6.68951	8.72125	10.2661	11.4404	8.3393	8.55925	8.35339	9.4639	1.11051	0.00808887	TNFRSF12A	TNF receptor superfamily member 12A
ENSG00000172062	SMN1	survival of motor neuron 1, telomeric	9.42363	9.38641	8.83547	9.36767	9.39476	9.00914	9.09818	9.67093	9.13916	10.3114	8.96293	9.68867	10.0266	10.4429	9.21726	9.97469	9.21647	9.71496	0.49849	0.00809925	SMN1	survival of motor neuron 1, telomeric
ENSG00000227615	AP001324.1	---	6.96339	7.42942	6.43308	7.47018	7.46104	7.02096	7.23071	7.70374	8.15471	8.81944	7.04897	7.62459	7.57741	8.07682	7.61106	7.13721	7.14411	7.75044	0.606325	0.0081267	AP001324.1	---
ENSG00000099783	HNRNPM	heterogeneous nuclear ribonucleoprotein M	11.1848	11.1989	11.002	11.5564	11.4471	11.2108	10.9635	11.9914	11.7835	12.1588	11.3073	11.4416	11.7458	11.842	11.2665	11.1756	11.2234	11.6347	0.411345	0.00815014	HNRNPM	heterogeneous nuclear ribonucleoprotein M
ENSG00000149548	CCDC15	coiled-coil domain containing 15	5.10398	5.81272	5.32158	5.81993	6.81107	5.43068	4.86342	4.80016	5.42229	5.31096	5.18399	2.64384	4.78397	4.32193	4.60529	4.37858	5.59477	4.60567	-0.9891	0.00818492	CCDC15	coiled-coil domain containing 15
ENSG00000168904	LRRC28	leucine rich repeat containing 28	9.03975	10.0424	9.02735	8.10261	8.80851	9.30035	8.9765	7.09967	8.55417	8.10886	8.60972	8.33693	7.99369	7.33092	9.34141	8.54132	9.0425	8.21297	-0.829534	0.00823885	LRRC28	leucine rich repeat containing 28
ENSG00000137801	THBS1	thrombospondin 1	10.7579	9.91931	10.1419	11.6859	11.5751	10.3833	12.7876	14.1627	11.6343	11.2662	10.8151	12.1983	14.7107	14.9431	11.2148	10.1697	11.0359	12.3461	1.31024	0.00825141	THBS1	thrombospondin 1
ENSG00000108691	CCL2	C-C motif chemokine ligand 2	7.18951	7.52261	8.91808	9.16216	10.8052	9.01951	10.3616	9.16109	9.73802	9.99685	9.11264	11.9606	13.0824	13.3819	10.0749	8.29609	8.99695	10.5338	1.53689	0.00826966	CCL2	C-C motif chemokine ligand 2
ENSG00000058668	ATP2B4	ATPase plasma membrane Ca2+ transporting 4	11.2537	10.6217	10.5258	10.2216	12.1612	11.7584	12.8517	11.3047	9.75858	11.1561	10.4931	11.4262	9.91576	9.65642	9.54482	10.8235	11.342	10.4533	-0.888779	0.0083378	ATP2B4	ATPase plasma membrane Ca2+ transporting 4
ENSG00000264293	RN7SL657P	RNA, 7SL, cytoplasmic 657, pseudogene	2.09008	3.17812	1.9203	2.45286	1.07167	1.16296	1.05737	4.21711	3.72879	1.62842	2.48831	4.06607	3.21674	3	2.28986	3.52141	1.84762	3.12852	1.2809	0.00834886	RN7SL657P	RNA, 7SL, cytoplasmic 657, pseudogene
ENSG00000254681	PKD1P5	polycystin 1, transient receptor potential channel interacting pseudogene 5	6.9821	7.07061	7.12229	7.25035	6.98428	6.45519	7.64334	7.88425	7.65259	8.54026	7.39036	7.17839	7.63274	7.16993	7.208	8.20222	7.0726	7.65097	0.578375	0.00841043	PKD1P5	polycystin 1, transient receptor potential channel interacting pseudogene 5
ENSG00000105989	WNT2	Wnt family member 2	4.92217	5.87058	6.28637	7.16295	3.29498	5.94765	4.80882	3.98365	5.58464	4.52126	5.83549	2.37849	2.76719	2.80735	4.13199	3.3671	5.4705	3.9308	-1.53971	0.00849711	WNT2	Wnt family member 2
ENSG00000101966	XIAP	X-linked inhibitor of apoptosis	7.29801	8.12589	8.32768	7.61553	8.36351	8.07628	7.86693	7.77257	10.0558	8.60757	7.84081	10.3394	7.4802	6.96578	9.88466	8.86338	7.9534	8.64558	0.692175	0.0085744	XIAP	X-linked inhibitor of apoptosis
ENSG00000196704	AMZ2	archaelysin family metallopeptidase 2	9.63936	9.57878	8.79985	9.55097	9.15371	9.39367	9.3815	8.94494	8.78551	8.80265	9.09044	8.47956	8.81067	8.33985	8.99605	9.59041	9.35683	8.87112	-0.485715	0.00858854	AMZ2	archaelysin family metallopeptidase 2
ENSG00000198168	SVIP	small VCP interacting protein	8.30462	8.43485	8.20142	8.59525	8.26876	8.14104	8.63973	9.42098	8.43148	8.43955	8.84491	9.04177	8.2072	9.15228	8.57462	9.13848	8.36938	8.8057	0.436318	0.00862325	SVIP	small VCP interacting protein
ENSG00000242372	EIF6	eukaryotic translation initiation factor 6	10.7532	10.8742	10.5519	10.3178	10.9097	10.6929	10.7087	11.1795	11.1702	11.8992	10.6545	10.926	11.0448	11.7822	10.7222	10.8674	10.6869	11.1384	0.451527	0.0086276	EIF6	eukaryotic translation initiation factor 6
ENSG00000229644	NAMPTP1	nicotinamide phosphoribosyltransferase pseudogene 1	10.3649	10.1789	10.641	9.81311	10.5386	11.2598	11.0747	12.3481	10.9547	11.4836	10.8795	11.3441	11.8032	13.1699	10.7453	8.95087	10.553	11.2977	0.7447	0.00863416	NAMPTP1	nicotinamide phosphoribosyltransferase pseudogene 1
ENSG00000111110	PPM1H	protein phosphatase, Mg2+/Mn2+ dependent 1H	9.6467	8.94288	8.97774	7.97499	8.73206	8.98465	8.36486	8.50445	8.32522	8.29811	8.44769	8.18906	7.82975	7.65821	8.62879	8.63306	8.80341	8.27937	-0.524043	0.0086483	PPM1H	protein phosphatase, Mg2+/Mn2+ dependent 1H
ENSG00000126391	FRMD8	FERM domain containing 8	5.89818	7.85913	8.38489	9.25807	8.66315	7.26132	6.99427	9.83939	8.98192	8.81944	8.59546	8.74616	9.17814	10.0265	8.73468	7.91949	7.75986	8.98236	1.2225	0.00865731	FRMD8	FERM domain containing 8
ENSG00000159023	EPB41	erythrocyte membrane protein band 4.1	11.2695	11.4895	11.5639	10.5874	11.2698	11.6723	11.3915	10.8069	10.4057	11.2377	10.8498	11.1749	11.2675	10.599	10.9169	10.5884	11.3206	10.8719	-0.448702	0.00867462	EPB41	erythrocyte membrane protein band 4.1
ENSG00000165997	ARL5B	ADP ribosylation factor like GTPase 5B	10.4944	10.3323	11.0072	10.2303	10.4322	10.3576	10.8207	12.5716	10.9156	10.8648	10.0278	11.1762	11.388	12.6573	10.7214	10.174	10.5249	11.1663	0.641368	0.00874752	ARL5B	ADP ribosylation factor like GTPase 5B
ENSG00000105321	CCDC9	coiled-coil domain containing 9	7.67671	8.00837	7.99642	7.95432	7.87403	7.81564	7.75586	8.72575	7.96721	8.69025	7.73028	8.574	8.98142	9.16491	7.61106	7.87007	7.86876	8.36833	0.499562	0.00876116	CCDC9	coiled-coil domain containing 9
ENSG00000169607	CKAP2L	cytoskeleton associated protein 2 like	2.74437	3.64406	5.53881	3.7581	6.83911	6.28222	4.27644	1.91789	3.83588	3.05677	5.5343	2.64384	3.08188	2.58496	3.66337	4.20722	4.72616	3.39179	-1.33437	0.00877059	CKAP2L	cytoskeleton associated protein 2 like
ENSG00000048162	NOP16	NOP16 nucleolar protein	9.4905	9.24862	8.1171	9.01019	8.85731	9.08352	9.06653	10.9676	9.78387	10.1267	8.41232	9.38993	9.81306	10.7912	8.62879	9.00421	8.98197	9.65752	0.675554	0.00878162	NOP16	NOP16 nucleolar protein
ENSG00000183729	NPBWR1	neuropeptides B and W receptor 1	3.5345	5.58968	6.4175	2.19535	2.92812	4.88269	5.8109	4.06574	3.61312	4.58551	2.48831	3.87281	2.36413	1.58496	0	4.01274	4.47982	2.95415	-1.52567	0.00878915	NPBWR1	neuropeptides B and W receptor 1
ENSG00000156298	TSPAN7	tetraspanin 7	9.79295	9.75235	10.5321	11.4409	9.6731	10.3453	9.73629	7.69086	9.97318	9.34073	9.99446	9.65336	9.25067	9.00562	9.81627	9.79152	10.1819	9.39074	-0.791112	0.00879072	TSPAN7	tetraspanin 7
ENSG00000175416	CLTB	clathrin light chain B	9.79427	9.55471	9.45893	9.73799	9.61347	9.03664	9.11796	10.7017	9.60619	9.53629	9.41509	9.94528	10.2515	10.5546	9.54857	10.2114	9.47342	9.9745	0.501076	0.008815	CLTB	clathrin light chain B
ENSG00000169976	SF3B5	splicing factor 3b subunit 5	10.066	10.3335	9.81022	9.94603	9.88126	10.0921	10.1704	11.0373	10.6536	11.4056	10.0478	10.4786	10.2227	11.5531	9.85618	9.87799	10.0428	10.5703	0.527544	0.00884313	SF3B5	splicing factor 3b subunit 5
ENSG00000111845	PAK1IP1	PAK1 interacting protein 1	8.51194	9.14692	8.22399	9.13256	9.02231	9.06027	9.09533	10.199	9.45481	10.1706	8.65993	9.69964	9.61664	10.5718	8.5929	8.55479	8.88476	9.50223	0.617466	0.00885005	PAK1IP1	PAK1 interacting protein 1
ENSG00000242086	LINC00969	long intergenic non-protein coding RNA 969	8.76517	9.05632	8.5114	8.94094	8.75432	9.10965	8.68591	9.42876	9.24496	8.86546	8.54589	9.15505	9.84073	8.86109	9.98913	9.9306	8.83196	9.31796	0.486006	0.00891824	LINC00969	long intergenic non-protein coding RNA 969
ENSG00000089876	DHX32	DEAH-box helicase 32 (putative)	9.53869	9.03116	9.82801	9.36963	9.62156	9.28896	9.76346	10.6977	9.72762	9.92106	9.50176	10.0143	9.99062	10.6064	10.0644	9.28305	9.49164	9.97854	0.486905	0.00896095	DHX32	DEAH-box helicase 32 (putative)
ENSG00000167004	PDIA3	protein disulfide isomerase family A member 3	14.3518	14.8138	14.4413	14.0425	15.0033	14.5659	14.8919	15.0274	14.809	15.2741	14.5136	14.9613	15.5062	15.3459	14.8815	15.2871	14.5872	15.0673	0.480144	0.00897454	PDIA3	protein disulfide isomerase family A member 3
ENSG00000133858	ZFC3H1	zinc finger C3H1-type containing	10.0033	10.017	10.1023	9.74101	9.51261	9.57336	9.54702	8.9148	9.39915	8.71918	9.35709	9.57807	9.65723	8.85175	9.66548	9.6397	9.78523	9.30916	-0.476071	0.00899184	ZFC3H1	zinc finger C3H1-type containing
ENSG00000225580	AL358942.1	---	2.55742	2.48561	2.90658	2.19535	2.70251	3.27414	3.27039	4.84734	3.02689	5.01686	2.48831	4.15378	3.08188	4.32193	3.42294	2.99794	2.77029	3.70643	0.936142	0.00901897	AL358942.1	---
ENSG00000103811	CTSH	cathepsin H	12.1598	12.1905	11.7288	11.1552	10.5931	10.5583	10.5892	11.1944	10.5986	9.91012	10.9817	10.8631	10.4252	10.2021	10.8546	11.0297	11.2821	10.6733	-0.608826	0.00903124	CTSH	cathepsin H
ENSG00000128891	CCDC32	coiled-coil domain containing 32	8.16012	7.88042	8.28538	8.49502	8.31441	8.35817	8.43414	8.85257	8.55809	8.49078	8.58395	8.80152	8.73683	8.78136	8.07369	8.65824	8.27538	8.61523	0.339847	0.0090581	CCDC32	coiled-coil domain containing 32
ENSG00000072736	NFATC3	nuclear factor of activated T-cells 3	9.02404	9.86696	10.1828	9.40815	9.88631	9.5497	9.75987	9.5043	9.43366	8.76152	9.66635	9.47328	8.06247	9.00282	8.57829	8.77791	9.66827	9.02896	-0.639311	0.00907552	NFATC3	nuclear factor of activated T-cells 3
ENSG00000267363	AC092296.3	---	3.31596	0	0	1.88167	0	2.23802	2.08522	0	0	0	0	0	0	0	0	0	1.36012	0	-1.36012	0.00911618	AC092296.3	---
ENSG00000071859	FAM50A	family with sequence similarity 50 member A	10.3434	10.0751	10.1943	10.0701	9.94554	9.85203	10.1167	11.1984	10.2413	10.4634	9.85775	10.4068	10.8767	10.4315	10.1298	11.0029	10.0853	10.5121	0.426753	0.00912755	FAM50A	family with sequence similarity 50 member A
ENSG00000178826	TMEM139	transmembrane protein 139	9.46246	7.68462	6.08408	5.90858	6.28782	6.92124	6.11085	6.31704	6.23974	4.52126	6.98913	5.85048	6.3036	5.61471	5.31835	7.2519	6.92281	6.04513	-0.877672	0.00917879	TMEM139	transmembrane protein 139
ENSG00000133302	SLF1	SMC5-SMC6 complex localization factor 1	7.85983	7.56704	6.46376	7.79484	7.17235	7.10128	6.93177	7.4825	6.7986	6.19308	6.73185	6.46187	6.59117	6.61471	6.91433	6.17093	7.27012	6.66211	-0.608009	0.00920557	SLF1	SMC5-SMC6 complex localization factor 1
ENSG00000149948	HMGA2	high mobility group AT-hook 2	0	0	2.49613	2.86097	2.10621	0	2.08522	0	0	0	0	0	0	0	0	0	1.36408	0	-1.36408	0.00920908	HMGA2	high mobility group AT-hook 2
ENSG00000157765	SLC34A2	solute carrier family 34 member 2	6.7831	4.94975	4.80333	7.04079	6.26733	5.51128	6.1553	6.79729	6.58496	6.0861	6.78309	7.33671	7.86097	8.89178	5.28275	7.07625	5.93013	6.96666	1.03653	0.00921065	SLC34A2	solute carrier family 34 member 2
ENSG00000186654	PRR5	proline rich 5	8.40161	7.6354	7.3852	7.53427	8.04628	7.87014	7.81247	8.61082	8.18033	8.25924	8.03508	8.5048	7.96044	8.82972	7.76089	8.64571	7.8122	8.30967	0.497473	0.00923055	PRR5	proline rich 5
ENSG00000104213	PDGFRL	platelet derived growth factor receptor like	4.17815	3.3507	3.98673	5.45813	5.1803	3.98823	5.66483	3.89661	5.64478	5.61795	6.41851	5.02235	5.9634	6.16993	6.71507	5.38428	4.54387	5.6481	1.10423	0.00924324	PDGFRL	platelet derived growth factor receptor like
ENSG00000146457	WTAP	WT1 associated protein	10.3853	10.2227	10.6385	10.833	10.6654	10.5712	10.6594	10.9098	10.5881	11.1395	10.557	11.1919	11.7734	12.2043	10.8577	10.5202	10.5679	11.0824	0.514516	0.00925345	WTAP	WT1 associated protein
ENSG00000100401	RANGAP1	Ran GTPase activating protein 1	10.925	10.5865	10.2449	10.1473	10.1171	10.5701	10.7849	12.6891	10.2998	11.3541	10.1293	11.8676	11.0402	12.5355	10.2172	10.0825	10.4822	11.135	0.652796	0.00927239	RANGAP1	Ran GTPase activating protein 1
ENSG00000196549	MME	membrane metalloendopeptidase	11.4289	11.5632	9.88436	9.40815	8.5447	11.3092	8.89694	6.13888	9.3705	8.33128	10.2778	7.38282	6.17698	6.83289	10.0981	9.02371	10.1479	8.18144	-1.96648	0.00936723	MME	membrane metalloendopeptidase
ENSG00000135094	SDS	serine dehydratase	12.9441	12.343	10.8871	12.1463	10.3505	8.5846	12.1883	16.2484	10.0832	12.0298	10.2616	13.2708	14.3969	16.5612	10.251	9.27764	11.3491	12.4867	1.13759	0.00939825	SDS	serine dehydratase
ENSG00000184164	CRELD2	cysteine rich with EGF like domains 2	10.2909	11.2516	9.60711	10.544	10.53	10.0556	10.6063	11.8806	10.6034	11.4511	10.6959	10.4691	11.8555	11.6022	9.86974	11.4714	10.4122	11.0999	0.687661	0.00948856	CRELD2	cysteine rich with EGF like domains 2
ENSG00000070423	RNF126	ring finger protein 126	8.01323	7.85913	8.44377	8.83748	8.51459	8.15991	8.59606	8.5692	9.46319	9.05326	8.12917	8.44954	8.5061	9.77808	9.25678	8.90604	8.34631	8.90126	0.554951	0.0095236	RNF126	ring finger protein 126
ENSG00000131876	SNRPA1	small nuclear ribonucleoprotein polypeptide A	9.96504	9.33338	8.95633	9.29142	9.03145	8.98465	9.28978	11.195	9.93002	10.1401	8.82549	9.54398	9.61359	10.7134	9.40488	9.56623	9.26458	9.88141	0.61683	0.00953429	SNRPA1	small nuclear ribonucleoprotein polypeptide A
ENSG00000228606	AL139011.1	---	3.42936	2.75508	4.14651	2.86097	2.92812	2.23802	3.42361	4.28722	3.93556	4.58551	3.11858	4.45941	3.91692	4.58496	3.77007	4.11325	3.11167	4.08572	0.974054	0.00956623	AL139011.1	---
ENSG00000256751	PLBD1-AS1	PLBD1 antisense RNA 1	3.42936	3.50482	4.70406	1.88167	4.5259	3.98823	3.5621	2.71312	2.34653	0	3.45824	3.06176	2.11061	2.58496	2.96489	2.99794	3.65659	2.47089	-1.1857	0.00959207	PLBD1-AS1	PLBD1 antisense RNA 1
ENSG00000092421	SEMA6A	semaphorin 6A	8.00411	9.0749	9.15501	10.5924	8.09942	8.80045	8.63189	7.71013	8.46106	7.8126	9.10057	8.18386	8.55147	7.80735	8.51066	8.1965	8.90832	8.25936	-0.64896	0.00966155	SEMA6A	semaphorin 6A
ENSG00000137101	CD72	CD72 molecule	6.71763	5.14996	6.6217	8.04021	7.49669	7.40537	7.88684	5.5356	5.9844	6.97107	6.99784	6.25925	6.62794	6.22882	6.40321	4.79647	7.04549	6.20051	-0.844976	0.00971591	CD72	CD72 molecule
ENSG00000101417	PXMP4	peroxisomal membrane protein 4	9.75401	8.7636	8.45908	7.6545	7.97857	9.37494	7.89341	8.10415	8.0362	7.55621	8.58972	7.72108	7.31714	7.46761	7.78016	8.55032	8.55402	7.90251	-0.651509	0.00972477	PXMP4	peroxisomal membrane protein 4
ENSG00000176393	RNPEP	arginyl aminopeptidase	10.7173	10.4365	10.3786	10.1541	9.70773	10.4903	10.1541	9.74755	10.0094	9.48035	10.0405	10.2314	9.35489	9.77479	10.2313	9.89398	10.2912	9.86268	-0.428566	0.00974271	RNPEP	arginyl aminopeptidase
ENSG00000241119	UGT1A9	UDP glucuronosyltransferase family 1 member A9	10.8474	13.1884	9.26358	9.09291	9.1141	11.8382	8.11212	9.95429	9.51245	9.86553	10.6892	9.24767	6.52772	8.00562	9.40694	7.54069	10.2081	8.97223	-1.23587	0.00974468	UGT1A9	UDP glucuronosyltransferase family 1 member A9
ENSG00000144134	RABL2A	RAB, member of RAS oncogene family like 2A	7.29801	7.34007	7.16024	7.37226	7.22643	7.27293	7.16702	6.97775	6.8506	7.33108	6.62357	6.46187	7.24795	6.45943	6.56014	6.83266	7.26242	6.81612	-0.446306	0.00978145	RABL2A	RAB, member of RAS oncogene family like 2A
ENSG00000163586	FABP1	fatty acid binding protein 1	15.8927	14.5794	15.0462	14.2664	16.0435	16.7892	14.4393	10.596	13.1142	14.6065	15.3935	14.3872	14.0055	13.7277	14.7777	14.8343	15.2938	13.938	-1.35575	0.0097836	FABP1	fatty acid binding protein 1
ENSG00000070444	MNT	MAX network transcriptional repressor	7.2292	7.39039	7.25973	8.10261	7.95314	7.40537	7.67422	8.62781	8.14952	8.24439	8.03085	8.16287	8.30506	8.53138	7.44385	7.35814	7.57352	8.09487	0.521352	0.00983813	MNT	MAX network transcriptional repressor
ENSG00000170323	FABP4	fatty acid binding protein 4	8.91873	6.73899	6.60803	8.51986	6.82515	7.36256	7.32127	6.2484	7.58512	6.75059	6.72138	5.74145	6.92249	5.88264	7.29097	7.02557	7.47066	6.6854	-0.785256	0.00987242	FABP4	fatty acid binding protein 4
ENSG00000164776	PHKG1	phosphorylase kinase catalytic subunit gamma 1	3.19287	2.75508	2.71591	3.65936	3.29498	2.57451	3.42361	4.21711	2.61058	2.86299	4.09923	4.38886	4.73986	4.39232	3.96235	4.20722	3.08804	3.94228	0.854236	0.00989066	PHKG1	phosphorylase kinase catalytic subunit gamma 1
ENSG00000198951	NAGA	alpha-N-acetylgalactosaminidase	10.6582	9.86696	10.3927	9.60005	9.68667	10.2205	9.45446	9.16343	9.32066	8.75804	9.99989	9.30387	9.3494	9.05528	9.88762	9.92023	9.98278	9.4176	-0.565181	0.0099132	NAGA	alpha-N-acetylgalactosaminidase
ENSG00000100029	PES1	pescadillo ribosomal biogenesis factor 1	9.95087	9.89512	9.67749	10.1174	9.95518	9.86359	9.96418	11.352	10.0682	11.0087	9.81285	10.584	10.6309	11.23	9.82713	9.3971	9.91769	10.4345	0.516855	0.00993894	PES1	pescadillo ribosomal biogenesis factor 1
ENSG00000151490	PTPRO	protein tyrosine phosphatase, receptor type O	5.32526	6.30765	6.78848	7.42581	7.00917	7.03466	6.53755	3.35928	5.55359	6.43898	6.64589	6.19867	5.09539	4.08746	6.00481	4.8557	6.63266	5.35998	-1.27268	0.00994048	PTPRO	protein tyrosine phosphatase, receptor type O
ENSG00000126785	RHOJ	ras homolog family member J	6.70642	7.73222	8.57599	8.50927	8.37791	8.54207	8.96406	8.21623	7.24966	7.75788	7.32962	8.15226	7.51988	7.10852	7.63243	7.50413	8.20113	7.60785	-0.593289	0.00995037	RHOJ	ras homolog family member J
ENSG00000278621	AC037198.3	---	2.34259	2.48561	1.51434	3.43896	4.30245	0	1.66096	5.14039	3.61312	2.0488	3.24091	3.52354	5.86414	4.16993	4.60529	3.3671	2.24927	3.95258	1.70331	0.00995066	AC037198.3	---
ENSG00000241158	ADAMTS9-AS1	ADAMTS9 antisense RNA 1	4.11174	3.50482	2.71591	5.01458	3.71375	2.23802	4.42905	5.72435	3.72879	3.76027	5.18399	3.97267	6.01983	6.80735	4.20987	4.37858	3.67541	4.86508	1.18967	0.00997898	ADAMTS9-AS1	ADAMTS9 antisense RNA 1
ENSG00000147124	ZNF41	zinc finger protein 41	7.95286	8.04024	8.55834	8.48785	8.05826	8.45305	8.24659	8.08951	8.05294	5.76393	6.45688	8.16815	7.66848	5.32193	6.0265	7.40846	8.25674	6.9952	-1.26154	0.00998186	ZNF41	zinc finger protein 41
ENSG00000181649	PHLDA2	pleckstrin homology like domain family A member 2	4.92217	2.75508	2.71591	5.51571	3.83009	5.05391	5.46746	7.3577	6.18001	5.1503	4.6337	5.74145	5.46413	6.84549	5.04846	4.6026	4.3229	5.66932	1.34641	0.0100365	PHLDA2	pleckstrin homology like domain family A member 2
ENSG00000156869	FRRS1	ferric chelate reductase 1	10.0406	9.92955	10.0105	6.07104	8.66315	9.77046	8.79879	8.01398	8.49821	7.97733	9.2132	8.29414	8.08027	7.12928	8.93143	8.74696	9.04058	8.32053	-0.720049	0.0100581	FRRS1	ferric chelate reductase 1
ENSG00000105392	CRX	cone-rod homeobox	2.34259	5.05333	2.71591	0	2.10621	2.23802	0	0	0	0	0	0	0	0	0	0	2.06515	0	-2.06515	0.0100744	CRX	cone-rod homeobox
ENSG00000164120	HPGD	hydroxyprostaglandin dehydrogenase 15-(NAD)	12.5287	11.8587	12.404	10.226	12.1147	13.9579	11.1893	10.7576	11.1887	10.279	12.3257	10.5153	10.5478	11.0112	11.7276	12.2179	12.0399	11.1745	-0.865374	0.0100905	HPGD	hydroxyprostaglandin dehydrogenase 15-(NAD)
ENSG00000196449	YRDC	yrdC N6-threonylcarbamoyltransferase domain containing	8.20859	8.33047	7.84155	8.44403	8.06421	8.28555	7.90648	9.66929	8.23026	9.0702	7.78157	8.76717	8.9503	9.70044	8.26371	7.95379	8.15441	8.70964	0.555229	0.0101134	YRDC	yrdC N6-threonylcarbamoyltransferase domain containing
ENSG00000282851	BISPR	BST2 interferon stimulated positive regulator (non-protein coding)	8.80249	7.97578	7.95384	7.49186	7.41521	7.99452	7.95128	7.0899	6.52221	7.02998	8.14884	7.52941	7.66258	6.14975	7.58937	6.91851	7.94071	7.18228	-0.75843	0.0101277	BISPR	BST2 interferon stimulated positive regulator (non-protein coding)
ENSG00000038945	MSR1	macrophage scavenger receptor 1	9.68289	9.81264	10.9763	11.0513	9.95838	10.0505	11.4645	8.96914	10.3959	10.0304	10.1381	9.9095	9.14681	9.07146	10.2078	7.68649	10.4281	9.50618	-0.921898	0.0101739	MSR1	macrophage scavenger receptor 1
ENSG00000187193	MT1X	metallothionein 1X	12.6008	11.7549	12.2239	12.4707	10.4195	13.4805	13.3454	14.6417	13.6189	10.9389	12.94	12.3339	14.6621	15.0845	12.997	13.3307	12.328	13.3942	1.06622	0.0101893	MT1X	metallothionein 1X
ENSG00000171298	GAA	glucosidase alpha, acid	9.63493	10.1974	10.2426	10.452	10.5322	9.98675	10.2144	9.28836	9.95101	9.86229	10.0224	10.1106	9.5591	9.75489	9.86222	8.91303	10.1801	9.70266	-0.477395	0.0101939	GAA	glucosidase alpha, acid
ENSG00000188906	LRRK2	leucine rich repeat kinase 2	9.15965	10.2731	8.66777	9.15312	8.81205	8.86705	8.88379	7.81473	8.95841	7.8392	8.79586	7.49623	8.33131	7.20945	9.21017	8.87416	9.11665	8.28106	-0.835595	0.0102032	LRRK2	leucine rich repeat kinase 2
ENSG00000269949	AC069307.1	---	1.39443	1.72262	1.51434	1.88167	0	0	1.66096	2.71312	1.6055	2.86299	0	3.06176	3.21674	3.58496	1.55829	3.78789	1.16772	2.48792	1.3202	0.0102301	AC069307.1	---
ENSG00000215154	AC141586.1	---	4.8425	5.68952	4.54103	5.54366	5.45854	4.46374	5.78285	5.82206	5.64478	7.5642	5.40942	6.15682	5.73525	6.74147	5.71544	5.25823	5.18883	6.0053	0.816464	0.0102342	AC141586.1	---
ENSG00000040933	INPP4A	inositol polyphosphate-4-phosphatase type I A	8.55632	7.58443	8.16455	9.37741	7.97225	8.63493	8.87385	7.56243	7.6744	7.42187	8.0266	8.6849	8.17028	7.07682	7.45188	8.10181	8.45196	7.79678	-0.655187	0.0102519	INPP4A	inositol polyphosphate-4-phosphatase type I A
ENSG00000078114	NEBL	nebulette	5.81714	5.10245	6.6217	7.29214	6.61418	6.16254	6.19842	5.7494	5.70252	4.52126	6.17939	6.02346	5.61829	5.35755	5.66103	4.67016	6.25837	5.49812	-0.760252	0.0102761	NEBL	nebulette
ENSG00000104549	SQLE	squalene epoxidase	10.1188	10.0377	11.4579	8.80609	11.5983	14.0974	9.22349	10.3924	8.35703	10.1587	9.69205	9.79138	10.6042	10.2538	9.25449	11.3421	10.7628	9.98291	-0.779884	0.0102858	SQLE	squalene epoxidase
ENSG00000101210	EEF1A2	eukaryotic translation elongation factor 1 alpha 2	9.01952	4.19003	4.59745	4.65335	7.44289	3.87094	4.42905	4.98028	4.61439	0	3.35366	9.86145	2.76719	5.52356	6.46805	2.16809	5.4576	4.41519	-1.04242	0.0102864	EEF1A2	eukaryotic translation elongation factor 1 alpha 2
ENSG00000175283	DOLK	dolichol kinase	8.17646	7.83753	8.33184	7.90669	8.48384	8.14104	8.57985	9.15642	8.50228	9.09801	8.61821	8.87434	8.62	9.01681	8.29085	7.84836	8.20818	8.66948	0.461298	0.0102935	DOLK	dolichol kinase
ENSG00000229119	AC026403.1	---	9.2836	9.30742	8.15988	9.94734	9.59097	8.75151	9.12077	9.6209	10.5833	10.2959	8.78836	9.22506	10.0663	10.5236	9.42543	10.2283	9.16593	9.86189	0.695966	0.0102939	AC026403.1	---
ENSG00000102699	PARP4	poly(ADP-ribose) polymerase family member 4	10.8223	11.1733	11.4198	11.2221	11.0355	11.5028	11.1466	10.7866	10.995	10.0519	11.302	11.1147	10.0707	9.97585	10.7197	10.3923	11.1889	10.601	-0.587924	0.0102982	PARP4	poly(ADP-ribose) polymerase family member 4
ENSG00000259370	AC103740.1	---	8.21651	7.51355	8.46288	7.34869	8.98828	8.82036	9.32911	9.76147	9.5285	10.0745	9.20383	9.63823	9.20273	8.24793	7.97677	9.31769	8.38277	9.21685	0.834078	0.0103041	AC103740.1	---
ENSG00000259137	AL109766.1	---	0	1.10446	0	1.48027	1.67975	0	0	2.71312	2.8337	3.05677	1.72491	1.03561	0	3.16993	1.96996	2.16809	0.609211	2.07468	1.46547	0.0103152	AL109766.1	---
ENSG00000143674	MAP3K21	mitogen-activated protein kinase kinase kinase 21	8.578	8.34585	8.30245	8.27925	8.39218	8.45814	8.58392	8.57622	8.43148	9.18612	7.86954	9.59579	9.27406	9.20945	8.78326	8.90954	8.41997	8.87061	0.45064	0.010351	MAP3K21	mitogen-activated protein kinase kinase kinase 21
ENSG00000235698	PA2G4P2	proliferation-associated 2G4 pseudogene 2	1.39443	3.50482	1.9203	0	2.10621	1.7984	2.08522	3.89661	3.48736	4.454	2.98492	3.97267	2.36413	3.80735	1.55829	2.50056	1.82991	3.2251	1.39519	0.0103595	PA2G4P2	proliferation-associated 2G4 pseudogene 2
ENSG00000167083	GNGT2	G protein subunit gamma transducin 2	5.46482	5.32575	4.54103	6.90732	5.1803	5.20695	5.43177	4.47919	4.72996	3.38029	4.80213	4.52667	4.90876	4.08746	5.51526	4.96734	5.43685	4.59967	-0.837173	0.0103655	GNGT2	G protein subunit gamma transducin 2
ENSG00000254054	AC087273.2	---	0	0	3.22575	1.48027	1.67975	3.27414	3.09895	6.78523	3.34958	3.96737	2.6735	4.23647	1.80284	6.2854	3.54816	2.99794	1.82269	3.96072	2.13803	0.0103715	AC087273.2	---
ENSG00000068078	FGFR3	fibroblast growth factor receptor 3	9.89889	9.53248	10.0489	10.1427	9.97269	10.5511	9.05484	7.74792	9.93605	9.59405	9.61779	8.9498	8.36074	7.76155	9.5764	9.21964	9.88595	8.97377	-0.912184	0.0103857	FGFR3	fibroblast growth factor receptor 3
ENSG00000188000	OR7D2	olfactory receptor family 7 subfamily D member 2	4.41688	1.72262	2.90658	0	0	4.54257	2.08522	0	0	0	0	1.63225	1.80284	2	0	0	2.23913	0.603899	-1.63523	0.0104149	OR7D2	olfactory receptor family 7 subfamily D member 2
ENSG00000175866	BAIAP2	BAI1 associated protein 2	10.5928	10.7389	9.18753	8.94356	9.48182	10.2618	9.32425	9.45945	9.26905	9.47612	9.59072	9.5561	8.94788	8.67596	8.80224	9.41936	9.7901	9.2441	-0.546004	0.0104201	BAIAP2	BAI1 associated protein 2
ENSG00000010292	NCAPD2	non-SMC condensin I complex subunit D2	8.87685	8.78633	8.96975	8.97469	9.27157	9.22168	8.98883	8.18443	8.649	8.70117	9.00454	8.23	8.60778	7.30378	8.86075	8.54583	9.01282	8.45414	-0.558674	0.0104645	NCAPD2	non-SMC condensin I complex subunit D2
ENSG00000116005	PCYOX1	prenylcysteine oxidase 1	12.8768	13.3875	13.0122	11.2329	11.5556	12.7408	11.9975	10.4267	11.4664	11.2959	12.6813	11.8194	10.7223	10.3399	12.3198	11.9329	12.4005	11.4449	-0.955513	0.0105266	PCYOX1	prenylcysteine oxidase 1
ENSG00000168497	CAVIN2	caveolae associated protein 2	9.60808	9.73103	10.2969	11.8201	9.1425	10.0871	8.83339	8.84678	10.0819	8.80602	10.0373	8.15758	7.70909	8.59991	9.45771	9.63125	9.93131	9.03639	-0.894921	0.0105602	CAVIN2	caveolae associated protein 2
ENSG00000198650	TAT	tyrosine aminotransferase	16.9279	16.1177	12.3146	13.8687	14.8588	13.8773	13.6863	15.2478	14.4759	12.2141	13.2207	13.0013	12.7386	14.1684	11.036	13.8413	14.5216	13.3271	-1.1945	0.010578	TAT	tyrosine aminotransferase
ENSG00000187630	DHRS4L2	dehydrogenase/reductase 4 like 2	9.19215	9.37895	8.79684	8.99761	8.82962	9.85782	8.60009	8.6612	8.65632	8.62296	8.87119	8.65139	8.43179	8.16491	9.18869	8.4955	9.0933	8.63822	-0.455083	0.0105974	DHRS4L2	dehydrogenase/reductase 4 like 2
ENSG00000154640	BTG3	BTG anti-proliferation factor 3	7.11518	7.21162	7.33631	8.31618	8.08778	7.90785	8.29208	9.12565	8.29269	8.54834	7.86954	8.58588	8.58614	9.55842	7.86686	7.48549	7.75243	8.43545	0.683018	0.0106287	BTG3	BTG anti-proliferation factor 3
ENSG00000111335	OAS2	2-5-oligoadenylate synthetase 2	10.0181	8.26724	9.68889	10.5577	10.3578	10.6254	9.06943	8.96914	9.3705	8.84592	10.0779	9.20467	9.42969	8.76818	9.22196	8.06464	9.79781	9.10584	-0.691968	0.0106442	OAS2	2-5-oligoadenylate synthetase 2
ENSG00000118596	SLC16A7	solute carrier family 16 member 7	8.83373	6.05659	8.67434	6.71178	8.89453	6.62781	7.54655	6.77306	9.64536	10.6326	9.72386	10.6988	6.8413	10.5333	9.61985	6.44613	7.62076	8.99048	1.36972	0.0106465	SLC16A7	solute carrier family 16 member 7
ENSG00000108107	RPL28	ribosomal protein L28	11.7854	12.0442	11.8935	12.5033	12.3356	11.8504	11.9501	12.487	13.0377	12.8333	11.6413	12.0601	12.7435	12.7698	12.4353	12.5991	12.0518	12.5119	0.46012	0.0106518	RPL28	ribosomal protein L28
ENSG00000277791	PSMB3	proteasome subunit beta 3	11.2992	11.1413	11.0227	10.9295	11.3408	10.9763	11.0919	11.2012	11.8918	11.9416	10.812	11.5471	11.4582	11.2894	11.4512	11.8457	11.1145	11.4931	0.378597	0.0106673	PSMB3	proteasome subunit beta 3
ENSG00000101079	NDRG3	NDRG family member 3	9.71819	9.55692	9.70984	9.6825	8.79425	9.49872	9.12356	8.14721	9.09403	8.20403	9.03233	8.86137	8.8527	7.30378	9.48342	9.26404	9.44057	8.69366	-0.746913	0.0106776	NDRG3	NDRG family member 3
ENSG00000106803	SEC61B	Sec61 translocon beta subunit	11.036	11.3928	10.3837	11.5573	11.5983	11.0346	11.1307	11.2936	11.9647	12.6515	10.7184	11.5195	12.0115	12.0556	11.4017	12.0548	11.1619	11.7413	0.579359	0.0106924	SEC61B	Sec61 translocon beta subunit
ENSG00000162813	BPNT1	3(2), 5-bisphosphate nucleotidase 1	10.0737	9.79594	9.42036	9.1823	9.3829	8.98465	9.37681	7.96668	8.16501	9.24201	8.73471	9.32528	7.78703	8.56224	9.36287	9.39461	9.45952	8.72672	-0.732806	0.0106965	BPNT1	3(2), 5-bisphosphate nucleotidase 1
ENSG00000198858	R3HDM4	R3H domain containing 4	8.71572	8.63594	8.77255	9.28108	9.12268	8.67485	9.19716	9.24717	9.01647	9.1035	8.79835	9.54195	9.82894	10.4062	9.53728	9.19977	8.91428	9.40885	0.494567	0.0107201	R3HDM4	R3H domain containing 4
ENSG00000163069	SGCB	sarcoglycan beta	9.3318	9.02481	9.37871	10.2705	9.28182	9.83059	8.98576	8.90089	9.37272	8.47391	9.30195	8.35092	9.05977	8.38802	9.4295	8.55479	9.44343	8.87027	-0.57316	0.0107651	SGCB	sarcoglycan beta
ENSG00000085511	MAP3K4	mitogen-activated protein kinase kinase kinase 4	9.55127	9.54808	9.60195	9.39094	9.26124	9.61955	9.19716	9.35517	8.94949	8.78565	9.3554	9.41899	8.90357	8.82337	9.10708	9.30447	9.45288	9.11147	-0.341417	0.0107683	MAP3K4	mitogen-activated protein kinase kinase kinase 4
ENSG00000136872	ALDOB	aldolase, fructose-bisphosphate B	17.5689	17.9375	16.0009	16.1226	15.3333	16.9815	16.0129	14.0547	15.4589	15.9989	15.8484	14.6399	14.9517	16.5885	16.4921	16.2087	16.5654	15.5824	-0.982966	0.0107685	ALDOB	aldolase, fructose-bisphosphate B
ENSG00000154582	ELOC	elongin C	9.92572	9.43276	9.64105	9.78704	9.48626	10.0404	10.0432	11.7583	9.68887	10.4233	9.56314	10.3638	10.5526	11.1997	9.51445	9.97134	9.7652	10.3373	0.572073	0.0107803	ELOC	elongin C
ENSG00000250722	SELENOP	selenoprotein P	15.9019	16.4026	16.3233	14.8101	14.917	16.5226	15.0882	13.9555	15.1172	14.9261	15.5232	14.4964	13.8904	14.7688	15.7419	15.537	15.7094	14.8841	-0.825335	0.0107998	SELENOP	selenoprotein P
ENSG00000154016	GRAP	GRB2-related adaptor protein	7.0188	7.48605	7.52265	8.83748	7.70149	7.95904	7.31148	7.38194	7.92538	7.26395	6.88979	5.27796	6.43392	6.24793	6.74153	7.11314	7.691	6.80839	-0.882606	0.0108627	GRAP	GRB2-related adaptor protein
ENSG00000132952	USPL1	ubiquitin specific peptidase like 1	9.58837	9.87051	9.26358	9.39094	9.26124	9.16986	9.28479	9.15876	9.14438	8.96845	9.13055	8.845	9.20069	9.44708	8.72145	8.96775	9.40419	9.0649	-0.339284	0.0108804	USPL1	ubiquitin specific peptidase like 1
ENSG00000005882	PDK2	pyruvate dehydrogenase kinase 2	8.80249	8.83074	8.89576	7.6736	9.09968	8.42731	8.48291	7.88425	8.34348	8.14662	8.78836	8.10353	7.27911	7.3837	8.30866	7.41832	8.60178	7.96178	-0.640004	0.0109114	PDK2	pyruvate dehydrogenase kinase 2
ENSG00000102781	KATNAL1	katanin catalytic subunit A1 like 1	9.69712	9.42313	9.23275	8.83465	8.7208	9.22467	8.44313	7.30797	8.71361	8.99235	8.67899	8.25996	8.22731	8.33092	8.98225	8.75864	9.08232	8.47244	-0.609877	0.0109383	KATNAL1	katanin catalytic subunit A1 like 1
ENSG00000135245	HILPDA	hypoxia inducible lipid droplet associated	6.88603	6.57462	6.82438	5.45813	7.05771	7.37338	7.03052	7.89552	6.97296	7.38624	6.60091	7.90927	8.78647	7.45943	7.35236	6.99954	6.74354	7.48474	0.741206	0.0110341	HILPDA	hypoxia inducible lipid droplet associated
ENSG00000203666	EFCAB2	EF-hand calcium binding domain 2	7.17332	5.97979	7.328	7.08901	7.76132	6.90641	6.66598	9.11364	7.23994	8.32659	7.6275	7.62459	7.55849	7.97154	6.60407	7.39853	6.98626	7.71832	0.732059	0.0110414	EFCAB2	EF-hand calcium binding domain 2
ENSG00000081148	IMPG2	interphotoreceptor matrix proteoglycan 2	2.74437	3.99569	4.22021	3.65936	3.71375	3.60318	4.19363	2.49343	2.02308	2.37392	3.73298	2.64384	1.80284	2	2.96489	3.66079	3.73289	2.63286	-1.10002	0.0110424	IMPG2	interphotoreceptor matrix proteoglycan 2
ENSG00000269019	AC002985.2	---	0	0	1.9203	2.45286	2.70251	0	2.08522	0	0	0	0	0	0	0	0	0	1.3087	0	-1.3087	0.0110965	AC002985.2	---
ENSG00000091622	PITPNM3	PITPNM family member 3	6.5522	6.32845	6.70108	7.86298	5.94492	7.21394	4.69299	4.5943	7.07486	5.45551	6.05149	4.15378	4.54853	4.90689	4.86805	6.02374	6.47094	5.29746	-1.17348	0.0111352	PITPNM3	PITPNM family member 3
ENSG00000107338	SHB	SH2 domain containing adaptor protein B	8.89177	9.43516	9.87868	9.12333	9.81044	9.23658	10.0012	10.5298	9.88553	10.2004	9.65264	10.6085	9.80103	11.1941	9.2078	9.66268	9.48245	10.0825	0.600046	0.01118	SHB	SH2 domain containing adaptor protein B
ENSG00000157315	TMED6	transmembrane p24 trafficking protein 6	7.61211	5.78289	7.12229	5.77348	8.64738	4.99906	6.53755	5.61953	8.99063	7.55621	8.43813	8.09801	9.8355	6.61471	8.36506	8.64571	6.63925	8.01817	1.37891	0.0111896	TMED6	transmembrane p24 trafficking protein 6
ENSG00000198855	FICD	FIC domain containing	7.99492	9.23492	8.43219	8.63801	8.47045	8.54207	9.3885	9.74599	8.8855	9.98945	8.76815	10.3289	10.0197	10.584	8.30422	7.67008	8.67158	9.36623	0.694647	0.0112198	FICD	FIC domain containing
ENSG00000085415	SEH1L	SEH1 like nucleoporin	9.36247	9.23216	9.58809	9.17115	9.77278	9.90706	9.81112	10.1703	9.94505	9.96097	9.59932	10.1485	9.97167	10.4798	9.48146	9.86544	9.54926	9.95805	0.408787	0.0112354	SEH1L	SEH1 like nucleoporin
ENSG00000164398	ACSL6	acyl-CoA synthetase long chain family member 6	7.29801	7.72439	7.50063	6.48551	7.66279	5.47154	6.39656	4.75138	6.42265	6.60318	6.99784	5.79699	5.61829	5.52356	6.72836	6.26133	6.93421	6.07818	-0.85603	0.0112407	ACSL6	acyl-CoA synthetase long chain family member 6
ENSG00000103647	CORO2B	coronin 2B	4.41688	4.89503	4.80333	6.2343	4.5259	5.10675	3.68846	5.93558	6.58496	5.61795	6.58944	3.87281	5.56871	5.9542	6.48381	5.77027	4.81009	5.81975	1.00965	0.0112407	CORO2B	coronin 2B
ENSG00000124006	OBSL1	obscurin like 1	10.3623	9.71533	9.95892	9.88725	10.1228	10.0404	9.7813	9.30324	9.72065	9.35	9.8838	9.85001	9.41048	9.43045	9.92129	9.7972	9.98118	9.62968	-0.351497	0.0112498	OBSL1	obscurin like 1
ENSG00000134686	PHC2	polyhomeotic homolog 2	11.463	11.0628	11.2348	11.4547	10.9846	11.1618	11.7951	13.0405	11.9103	11.7406	10.8133	11.54	12.3175	13.3821	11.4182	11.0638	11.3081	11.914	0.605917	0.0112728	PHC2	polyhomeotic homolog 2
ENSG00000278206	AL031320.2	---	2.09008	1.72262	0	2.19535	2.43495	0	0	0	3.72879	3.22758	3.64709	2.64384	1.80284	3.45943	3.66337	2.77058	1.20614	2.7715	1.56536	0.0112936	AL031320.2	---
ENSG00000197408	CYP2B6	cytochrome P450 family 2 subfamily B member 6	9.39774	10.2529	9.49093	9.91961	9.06152	8.41165	8.23628	9.25812	8.13911	7.6418	9.9013	6.57741	5.77951	7.59246	7.46782	7.21844	9.25294	7.73066	-1.52228	0.0113178	CYP2B6	cytochrome P450 family 2 subfamily B member 6
ENSG00000115350	POLE4	DNA polymerase epsilon 4, accessory subunit	8.42231	8.81976	8.74784	8.59858	8.59078	8.53244	8.90347	8.9638	9.04465	9.15734	8.18357	8.97711	9.30845	9.25267	9.26821	9.02371	8.65931	9.01995	0.360635	0.0113251	POLE4	DNA polymerase epsilon 4, accessory subunit
ENSG00000106034	CPED1	cadherin like and PC-esterase domain containing 1	10.9043	11.1912	11.1077	10.2249	10.2934	11.0036	10.9882	8.69383	9.83962	9.83447	11.0793	9.91892	10.1561	9.95565	10.5937	10.5463	10.8162	10.0686	-0.747522	0.0113373	CPED1	cadherin like and PC-esterase domain containing 1
ENSG00000282508	LINC01002	long intergenic non-protein coding RNA 1002	4.80095	2.75508	5.06574	4.84525	5.08984	4.19758	5.10916	4.84734	6.00749	5.45551	5.3011	5.19769	5.64245	5.12928	5.76789	5.46258	4.55194	5.42348	0.871539	0.0113384	LINC01002	long intergenic non-protein coding RNA 1002
ENSG00000245694	CRNDE	colorectal neoplasia differentially expressed	2.09008	4.36128	4.06883	2.6713	4.38084	2.23802	2.67935	4.80016	4.19893	5.31096	2.98492	5.11268	5.98245	4.24793	3.42294	4.29544	3.21281	4.48405	1.27123	0.0113502	CRNDE	colorectal neoplasia differentially expressed
ENSG00000084623	EIF3I	eukaryotic translation initiation factor 3 subunit I	11.5101	11.3044	11.3685	11.6945	11.9684	11.9045	11.7258	12.4138	12.0331	12.3934	11.4818	12.1759	11.9059	12.85	11.6766	11.8715	11.6395	12.0891	0.449639	0.0113652	EIF3I	eukaryotic translation initiation factor 3 subunit I
ENSG00000115425	PECR	peroxisomal trans-2-enoyl-CoA reductase	11.2441	11.7346	10.4693	9.98605	10.3554	11.3753	9.96105	9.24056	10.1431	9.19645	11.0116	9.90318	8.93571	9.02791	10.2219	10.8049	10.7323	9.8317	-0.900561	0.0113913	PECR	peroxisomal trans-2-enoyl-CoA reductase
ENSG00000109680	TBC1D19	TBC1 domain family member 19	6.64904	6.24339	5.32158	5.95094	6.22545	5.94765	6.68126	5.91358	5.02974	4.8698	6.32479	5.11268	5.46413	5.90689	5.00543	4.79647	6.14562	5.38039	-0.765227	0.0113957	TBC1D19	TBC1 domain family member 19
ENSG00000132432	SEC61G	Sec61 translocon gamma subunit	9.32266	9.82	8.99884	10.0447	10.0255	9.73103	10.0178	10.4441	10.5225	11.2772	8.78333	10.0871	10.5942	11.0914	9.97386	9.98301	9.70865	10.3063	0.597658	0.0114015	SEC61G	Sec61 translocon gamma subunit
ENSG00000124145	SDC4	syndecan 4	11.9128	11.9795	12.3352	11.3384	12.9467	11.7016	12.414	13.4322	12.2649	12.7322	12.0598	12.5527	13.8778	14.3792	11.8344	12.2702	12.0897	12.8226	0.732885	0.011406	SDC4	syndecan 4
ENSG00000163754	GYG1	glycogenin 1	9.17193	8.60644	9.2372	9.89812	9.34429	9.29466	9.40929	10.6436	9.5814	9.99093	9.45828	9.82518	9.77394	10.9901	9.50095	8.97779	9.28028	9.86024	0.579962	0.0114365	GYG1	glycogenin 1
ENSG00000260314	MRC1	mannose receptor C-type 1	11.5747	12.3285	12.8511	13.3465	11.536	12.5402	11.4316	10.2193	12.1287	11.12	12.4185	12.1246	10.4451	11.544	10.8516	9.80097	12.2298	11.1836	-1.04617	0.0114541	MRC1	mannose receptor C-type 1
ENSG00000213065	AL009178.1	---	0	3.17812	1.9203	1.88167	2.10621	0	0	0	0	0	0	0	0	0	0	0	1.29804	0	-1.29804	0.0114647	AL009178.1	---
ENSG00000204371	EHMT2	euchromatic histone lysine methyltransferase 2	9.43556	9.47301	9.21032	9.29964	8.92755	8.96689	8.4476	8.84096	8.79549	8.29811	8.90165	8.65515	8.0714	7.93664	8.89062	9.06194	9.10865	8.60577	-0.50288	0.0114784	EHMT2	euchromatic histone lysine methyltransferase 2
ENSG00000166913	YWHAB	tyrosine 3-monooxygenase/tryptophan 5-monooxygenase activation protein beta	10.2471	10.465	10.6577	10.463	10.8881	10.2487	10.4568	10.7009	12.227	11.276	11.8803	10.4068	10.3855	10.3387	12.0192	10.256	10.4895	11.0545	0.565011	0.0115827	YWHAB	tyrosine 3-monooxygenase/tryptophan 5-monooxygenase activation protein beta
ENSG00000125827	TMX4	thioredoxin related transmembrane protein 4	10.4131	10.5427	11.0393	10.942	11.2845	10.6993	11.4962	11.3928	11.2217	11.6817	11.0159	11.4096	11.6736	11.8971	11.4177	10.9125	10.9168	11.4025	0.485766	0.0115928	TMX4	thioredoxin related transmembrane protein 4
ENSG00000118965	WDR35	WD repeat domain 35	7.09813	6.1295	6.59424	7.31665	7.71668	7.24962	7.68183	8.29492	8.16501	8.61528	8.141	7.67735	7.46673	7.91289	7.22685	6.74138	7.11238	7.8046	0.692223	0.0116169	WDR35	WD repeat domain 35
ENSG00000092148	HECTD1	HECT domain E3 ubiquitin protein ligase 1	12.1427	12.403	12.4805	11.1415	12.0183	11.9208	12.0344	11.6676	11.7514	11.8841	11.8303	11.5516	11.4159	11.5939	11.6428	11.5424	12.0202	11.6533	-0.366849	0.0117087	HECTD1	HECT domain E3 ubiquitin protein ligase 1
ENSG00000178445	GLDC	glycine decarboxylase	12.187	13.1864	12.8393	10.6304	10.4775	12.745	11.7175	11.2001	11.5195	11.599	11.7805	11.1337	10.3953	12.006	10.8006	11.4978	11.969	11.3258	-0.643182	0.0117358	GLDC	glycine decarboxylase
ENSG00000106278	PTPRZ1	protein tyrosine phosphatase, receptor type Z1	2.55742	3.17812	3.48694	5.77348	4.88989	4.75609	5.43177	6.08084	6.86332	5.27245	6.164	4.59094	6.46135	4.90689	6.57493	4.01274	4.29624	5.65861	1.36236	0.0117386	PTPRZ1	protein tyrosine phosphatase, receptor type Z1
ENSG00000130826	DKC1	dyskerin pseudouridine synthase 1	8.98978	9.17302	9.35027	9.38129	9.60124	9.46876	9.58407	10.216	9.78387	10.5107	9.183	10.1918	10.0105	11.0355	9.33924	8.75864	9.36406	9.89214	0.528076	0.0117521	DKC1	dyskerin pseudouridine synthase 1
ENSG00000236603	RANP1	RAN, member RAS oncogene family pseudogene 1	5.93705	6.46619	5.38705	6.36537	6.405	6.8299	6.46878	7.54822	6.73084	7.48219	6.57788	7.08106	6.34836	7.55459	6.2641	6.52123	6.26562	6.90094	0.635319	0.0118024	RANP1	RAN, member RAS oncogene family pseudogene 1
ENSG00000240401	AC012358.3	---	5.56749	4.94975	4.94049	4.09677	4.03792	5.20695	4.0122	4.93732	1.01543	2.63908	3.81405	3.23264	3.74903	4.32193	3.2858	3.66079	4.68737	3.40623	-1.28114	0.0118116	AC012358.3	---
ENSG00000275183	LENG9	leukocyte receptor cluster member 9	5.56749	4.43984	5.84872	5.84261	6.405	6.69837	6.75532	6.68489	6.6886	6.85855	6.33856	7.27936	7.58366	8.2854	6.54519	5.34347	5.93676	6.8453	0.908535	0.0118354	LENG9	leukocyte receptor cluster member 9
ENSG00000166206	GABRB3	gamma-aminobutyric acid type A receptor beta3 subunit	7.51268	4.43984	7.21535	7.58895	5.04239	9.24249	5.89194	5.77403	6.00749	5.70729	6.164	6.6395	6.63999	6.24793	5.63303	6.80287	6.7048	6.17957	-0.525234	0.01184	GABRB3	gamma-aminobutyric acid type A receptor beta3 subunit
ENSG00000258568	RHOQP1	ras homolog family member Q pseudogene 1	3.72426	3.77104	4.22021	4.24032	3.44848	3.27414	3.80463	2.23417	3.34958	2.0488	2.83759	2.05309	3.34007	3.45943	2.28986	3.66079	3.7833	2.80815	-0.975142	0.0119261	RHOQP1	ras homolog family member Q pseudogene 1
ENSG00000271730	AL390208.1	---	3.6325	2.98205	0	3.7581	2.10621	2.23802	3.09895	1.51221	2.61058	0	1.72491	0	1.80284	1.58496	0	0	2.54512	1.02617	-1.51895	0.0119733	AL390208.1	---
ENSG00000188706	ZDHHC9	zinc finger DHHC-type containing 9	11.3532	10.7716	10.8027	9.89269	11.2267	10.994	11.2986	12.4633	11.3424	11.6831	10.7484	11.8793	11.3791	12.4993	10.9096	10.9756	10.9056	11.5422	0.636617	0.0119936	ZDHHC9	zinc finger DHHC-type containing 9
ENSG00000165810	BTNL9	butyrophilin like 9	8.59329	6.91431	7.29427	9.33406	6.09199	8.22708	7.1117	5.21424	7.69588	5.01686	6.03468	4.38886	5.84344	6.78136	7.4914	7.97398	7.65239	6.27119	-1.3812	0.0120926	BTNL9	butyrophilin like 9
ENSG00000134343	ANO3	anoctamin 3	7.91442	4.6527	4.06883	5.33558	5.34579	5.30064	6.13325	5.7494	5.75804	4.06074	4.76183	4.38886	3.34007	5	4.60529	3.3671	5.53589	4.55904	-0.97685	0.0121075	ANO3	anoctamin 3
ENSG00000144476	ACKR3	atypical chemokine receptor 3	7.14869	6.00584	6.17956	8.18478	7.54004	6.8299	8.12335	9.62598	7.20041	7.7855	6.92671	10.8426	7.23211	10.3276	6.92591	6.69347	7.1446	8.17337	1.02877	0.0121156	ACKR3	atypical chemokine receptor 3
ENSG00000242951	AC007182.2	---	5.5425	5.05333	5.21744	6.03211	5.6917	5.05391	4.75207	4.84734	7.1285	7.07544	5.18399	5.92716	6.00126	6.22882	5.96044	6.23926	5.33472	6.0658	0.73108	0.0121339	AC007182.2	---
ENSG00000141076	UTP4	UTP4, small subunit processome component	8.97585	9.41099	9.35437	9.46954	9.63961	9.65988	9.6593	10.1111	9.9194	10.3547	9.3418	10.0968	9.93423	10.5651	9.36713	9.35153	9.45279	9.89354	0.440744	0.0121422	UTP4	UTP4, small subunit processome component
ENSG00000123352	SPATS2	spermatogenesis associated serine rich 2	8.02681	7.6354	8.70355	8.62171	7.73917	8.20302	8.21544	7.12861	8.12334	7.94095	7.21489	7.62459	7.96524	7.02237	8.09437	7.05113	8.16359	7.57394	-0.589642	0.0121857	SPATS2	spermatogenesis associated serine rich 2
ENSG00000273350	AC004832.5	---	7.43333	6.96831	3.70802	2.45286	2.92812	5.3453	2.67935	4.47919	2.8337	2.0488	4.16251	3.76551	2.36413	3.32193	0.980041	5.64154	4.50219	3.2886	-1.21359	0.012214	AC004832.5	---
ENSG00000155868	MED7	mediator complex subunit 7	7.88986	7.34007	7.21535	7.9013	8.11096	7.57435	7.61975	8.85834	8.01926	7.87178	8.08494	7.95272	8.05799	8.56986	7.97677	7.79639	7.66452	8.132	0.467484	0.0122207	MED7	mediator complex subunit 7
ENSG00000175606	TMEM70	transmembrane protein 70	9.92209	9.983	9.71781	9.22392	9.3246	10.2662	9.47213	10.1135	10.3761	10.4709	9.28428	10.4966	10.4408	10.6348	9.99326	9.96967	9.70139	10.1978	0.496367	0.0122371	TMEM70	transmembrane protein 70
ENSG00000198355	PIM3	Pim-3 proto-oncogene, serine/threonine kinase	10.1167	9.6466	10.1886	10.7767	10.1856	10.0284	9.97971	11.2672	10.4506	10.42	10.0107	10.6515	10.8497	11.8914	9.9542	10.7027	10.1318	10.6887	0.556923	0.012247	PIM3	Pim-3 proto-oncogene, serine/threonine kinase
ENSG00000114853	ZBTB47	zinc finger and BTB domain containing 47	6.96339	6.57462	7.7387	8.09791	8.22692	7.72559	8.00083	8.30341	8.19549	8.80602	8.54292	8.97109	8.59855	9.03067	7.6947	6.84733	7.61828	8.33224	0.71396	0.0122764	ZBTB47	zinc finger and BTB domain containing 47
ENSG00000131620	ANO1	anoctamin 1	11.8751	12.3953	10.9005	10.4911	9.32211	12.0248	9.40929	8.88402	10.0887	8.51985	11.3906	9.28457	8.79458	10.9114	10.1862	10.6524	10.9169	9.85692	-1.05998	0.0122782	ANO1	anoctamin 1
ENSG00000165507	C10orf10	chromosome 10 open reading frame 10	10.3747	9.60459	10.1336	11.2747	11.5792	10.1067	10.6043	11.0252	9.85084	11.5525	11.6343	11.2565	13.0227	11.9058	11.4755	10.4354	10.5254	11.351	0.825562	0.0122846	C10orf10	chromosome 10 open reading frame 10
ENSG00000071626	DAZAP1	DAZ associated protein 1	10.6842	10.5382	10.5084	10.3568	10.5503	10.2878	10.5575	11.6581	10.8055	11.0312	10.2525	10.872	10.9787	11.2234	10.3457	10.8629	10.4976	10.8922	0.39462	0.0123103	DAZAP1	DAZ associated protein 1
ENSG00000132507	EIF5A	eukaryotic translation initiation factor 5A	12.0463	11.9061	11.8071	12.2272	12.3445	12.1735	12.1967	12.4688	12.7622	13.4902	11.7272	12.7479	12.4974	13.3108	12.2054	12.0596	12.1002	12.5855	0.485279	0.0123165	EIF5A	eukaryotic translation initiation factor 5A
ENSG00000163938	GNL3	G protein nucleolar 3	10.3325	11.0867	11.0304	11.3439	11.22	11.1238	11.0535	12.0104	11.4891	12.3277	10.3312	11.7227	11.9474	12.9037	10.9563	10.8011	11.0273	11.61	0.582697	0.0124656	GNL3	G protein nucleolar 3
ENSG00000126934	MAP2K2	mitogen-activated protein kinase kinase 2	10.2606	10.1631	10.5732	10.5422	10.1157	10.0129	10.4162	10.8069	10.6555	11.1015	9.85656	10.9422	10.9674	10.7993	10.2556	10.8754	10.2977	10.6956	0.39789	0.0124662	MAP2K2	mitogen-activated protein kinase kinase 2
ENSG00000104472	CHRAC1	chromatin accessibility complex 1	7.03681	7.40025	7.86472	6.91803	8.1052	7.98043	8.29208	6.87903	8.64533	8.48658	7.73028	8.92509	8.23924	8.55459	8.66726	8.73911	7.65679	8.3185	0.661712	0.0124771	CHRAC1	chromatin accessibility complex 1
ENSG00000126749	EMG1	EMG1, N1-specific pseudouridine methyltransferase	9.72515	9.73103	9.22606	9.46589	9.50825	9.4433	9.51753	10.35	9.92699	10.5695	9.10259	9.71233	9.94399	10.676	9.30638	10.1009	9.51675	9.9654	0.448658	0.0125113	EMG1	EMG1, N1-specific pseudouridine methyltransferase
ENSG00000158125	XDH	xanthine dehydrogenase	10.8397	11.9357	10.0514	9.81168	10.5332	10.6972	10.8765	10.0818	10.347	10.6298	10.6316	9.36717	8.73403	10.3934	9.39657	9.88156	10.6779	9.94032	-0.737598	0.0125258	XDH	xanthine dehydrogenase
ENSG00000258749	AL110504.1	---	5.35427	5.19596	4.98346	4.5469	4.6577	4.68837	4.69299	5.86855	5.02974	5.23287	5.35628	5.82398	5.59371	6.65821	5.13086	4.96734	4.87424	5.51795	0.643713	0.0125317	AL110504.1	---
ENSG00000140988	RPS2	ribosomal protein S2	13.3856	13.2637	12.9448	13.7174	13.7181	13.1331	13.5413	13.5383	14.456	14.6816	13.1373	14.0578	13.548	14.2736	13.7437	13.613	13.3863	13.8944	0.50809	0.012567	RPS2	ribosomal protein S2
ENSG00000100902	PSMA6	proteasome subunit alpha 6	11.0157	11.1384	10.8455	11.1546	11.0225	10.5864	11.1376	11.434	11.1425	11.812	11.0013	11.188	11.3773	12.3004	11.3446	11.0646	10.9858	11.4072	0.421347	0.0125696	PSMA6	proteasome subunit alpha 6
ENSG00000165140	FBP1	fructose-bisphosphatase 1	14.8997	12.7543	12.1049	13.037	12.3123	13.0504	11.7478	11.5284	12.2462	13.0489	12.1048	11.4057	10.9999	13.006	12.3639	11.8692	12.8438	12.0637	-0.780111	0.0125713	FBP1	fructose-bisphosphatase 1
ENSG00000228716	DHFR	dihydrofolate reductase	10.1949	10.7016	10.3347	9.17562	10.4055	10.499	9.61622	9.80395	9.63798	9.45907	10.3611	9.3347	8.88344	8.37069	9.6446	9.74528	10.1325	9.4712	-0.661301	0.0125961	DHFR	dihydrofolate reductase
ENSG00000258484	SPESP1	sperm equatorial segment protein 1	6.15057	5.51907	6.927	5.23631	6.49587	2.84716	6.08811	3.98365	5.88815	2.0488	4.76183	4.15378	4.44242	5.49185	5.09025	4.37858	5.60916	4.47103	-1.13812	0.0125966	SPESP1	sperm equatorial segment protein 1
ENSG00000251165	F11-AS1	F11 antisense RNA 1	10.1481	9.93973	9.88719	7.885	8.29935	9.23954	8.48291	7.94516	7.3159	7.87178	9.10057	8.46677	7.86611	8.90989	8.93143	9.03015	9.12597	8.38197	-0.743997	0.0126382	F11-AS1	F11 antisense RNA 1
ENSG00000254473	AL354920.1	---	6.86602	7.09509	5.75263	4.43196	5.34579	5.79502	6.1553	5.7494	3.93556	4.52126	5.60434	4.76816	5.35137	5.20945	5.35309	5.70734	5.92026	5.13333	-0.786929	0.012694	AL354920.1	---
ENSG00000138069	RAB1A	RAB1A, member RAS oncogene family	11.2358	11.586	11.3705	11.2752	11.522	11.7891	11.6317	11.5257	12.2359	12.0434	11.989	12.0249	11.7917	12.0231	12.1871	11.0337	11.4872	11.8727	0.385542	0.0127224	RAB1A	RAB1A, member RAS oncogene family
ENSG00000204501	PRAMEF15	PRAME family member 15	4.04213	2.15398	0	2.6713	0	0	4.91603	1.91789	0	0	0	0	0	0	0	0	1.96906	0.213099	-1.75596	0.012723	PRAMEF15	PRAME family member 15
ENSG00000179431	FJX1	four jointed box 1	5.17074	3.77104	5.89447	5.88692	7.10467	6.34954	8.03096	7.60424	6.92526	6.97107	6.25392	7.63225	9.21889	9.09803	7.18889	6.17093	6.02976	7.4515	1.42173	0.0127284	FJX1	four jointed box 1
ENSG00000115128	SF3B6	splicing factor 3b subunit 6	10.3774	10.3258	10.1096	10.5072	10.704	10.4448	10.4612	10.5088	10.8691	11.1213	10.2804	10.7612	10.7109	11.0126	10.5173	10.8994	10.4186	10.7423	0.323778	0.0127452	SF3B6	splicing factor 3b subunit 6
ENSG00000205730	ITPRIPL2	inositol 1,4,5-trisphosphate receptor interacting protein like 2	9.50026	8.66893	9.76475	9.08342	10.0809	9.63086	9.99355	10.5557	9.66547	9.94728	9.64712	10.0871	10.2136	10.8138	9.96687	9.99129	9.53181	10.0987	0.566895	0.0127677	ITPRIPL2	inositol 1,4,5-trisphosphate receptor interacting protein like 2
ENSG00000134480	CCNH	cyclin H	9.22982	9.24862	9.21032	9.59505	9.6094	9.53049	9.90684	10.8839	10.0668	10.2408	9.12659	9.86795	9.80505	11.2773	9.27502	9.62061	9.47579	10.0182	0.542432	0.0127699	CCNH	cyclin H
ENSG00000224616	RTCA-AS1	RTCA antisense RNA 1	4.11174	3.64406	3.48694	4.30707	1.67975	2.57451	3.5621	0	0	2.63908	3.55575	0	0	1	2.55154	1.73532	3.33803	1.27574	-2.06228	0.0127711	RTCA-AS1	RTCA antisense RNA 1
ENSG00000152795	HNRNPDL	heterogeneous nuclear ribonucleoprotein D like	11.2767	11.048	11.2808	12.7001	11.846	11.4641	11.6193	12.6574	12.5867	12.8087	11.6122	11.9233	12.2479	13.3662	11.7	11.8715	11.605	12.3082	0.703209	0.0127808	HNRNPDL	heterogeneous nuclear ribonucleoprotein D like
ENSG00000107331	ABCA2	ATP binding cassette subfamily A member 2	9.714	9.39383	9.64941	9.24748	9.29959	9.49377	9.64183	8.01398	9.23766	8.31716	9.84455	8.91257	8.31261	7.91886	9.21961	9.00093	9.49142	8.7531	-0.738314	0.0128014	ABCA2	ATP binding cassette subfamily A member 2
ENSG00000138468	SENP7	SUMO1/sentrin specific peptidase 7	8.28591	8.7636	8.43992	9.43264	8.84699	8.63043	9.01319	7.40577	8.32061	7.90363	9.04078	8.25501	8.36437	7.50779	8.58196	7.98064	8.77324	8.15117	-0.622066	0.0128679	SENP7	SUMO1/sentrin specific peptidase 7
ENSG00000081177	EXD2	exonuclease 3-5 domain containing 2	9.57611	9.56351	9.1503	8.86543	8.54895	9.16986	9.23389	8.80257	8.09667	8.32659	8.68977	9.00981	8.69412	7.40939	8.90533	9.11442	9.15829	8.56096	-0.597329	0.0129292	EXD2	exonuclease 3-5 domain containing 2
ENSG00000179044	EXOC3L1	exocyst complex component 3 like 1	5.68634	3.99569	5.67611	7.6023	6.73849	6.34954	5.91797	5.67289	6.05259	5.76393	5.51017	5.02235	4.94807	4.52356	5.28275	4.67016	5.99521	5.27183	-0.723376	0.0129412	EXOC3L1	exocyst complex component 3 like 1
ENSG00000036448	MYOM2	myomesin 2	7.27544	6.52143	6.04404	6.0517	6.20405	6.16254	6.99427	5.79825	5.64478	5.31096	6.25392	6.62423	4.64736	5.08746	5.00543	6.28307	6.46478	5.62839	-0.836397	0.0129838	MYOM2	myomesin 2
ENSG00000143067	ZNF697	zinc finger protein 697	7.94811	7.90831	8.28966	7.41071	8.31441	8.14104	8.42509	9.04952	8.25459	8.32188	8.18738	8.51311	8.44558	8.87652	8.28186	8.57256	8.06248	8.50033	0.437856	0.0129926	ZNF697	zinc finger protein 697
ENSG00000152782	PANK1	pantothenate kinase 1	12.3094	11.6053	11.3085	9.33406	10.9901	11.7208	11.0565	9.7272	10.1918	9.37749	10.6211	10.171	9.80772	7.17991	11.2533	11.4233	11.1892	9.97253	-1.2167	0.0130182	PANK1	pantothenate kinase 1
ENSG00000147533	GOLGA7	golgin A7	9.75129	9.65897	9.85284	9.37547	9.05854	9.81082	9.62613	10.4679	9.64536	9.75986	9.99772	10.7124	9.73514	10.8903	10.4386	9.13549	9.59058	10.087	0.496387	0.0130252	GOLGA7	golgin A7
ENSG00000074054	CLASP1	cytoplasmic linker associated protein 1	10.7278	10.4281	10.3867	10.2378	9.91458	10.1018	9.91333	10.0818	9.79719	9.69033	10.0426	9.99511	9.39633	9.57175	10.2693	9.90278	10.2443	9.8608	-0.383495	0.0130551	CLASP1	cytoplasmic linker associated protein 1
ENSG00000275392	AL445493.3	---	2.55742	2.75508	4.29034	0	4.94253	2.23802	4.19363	1.51221	6.29708	5.10718	3.55575	4.71147	4.26701	7.42626	4.76861	4.37858	2.99672	4.66935	1.67263	0.0130643	AL445493.3	---
ENSG00000185022	MAFF	MAF bZIP transcription factor F	7.98104	6.46619	7.40114	7.91741	7.96591	6.28222	9.13748	10.5207	8.13387	7.46521	6.80308	8.85157	10.0595	11.2906	7.95996	7.53163	7.59306	8.73513	1.14207	0.013073	MAFF	MAF bZIP transcription factor F
ENSG00000003056	M6PR	mannose-6-phosphate receptor, cation dependent	11.2441	11.3051	10.4474	9.62643	10.948	11.1796	11.5611	11.4593	9.62684	10.0174	10.0572	10.587	9.80237	9.49386	9.47556	10.4855	10.9017	10.1117	-0.790005	0.0131123	M6PR	mannose-6-phosphate receptor, cation dependent
ENSG00000184205	TSPYL2	TSPY like 2	8.74887	9.47768	7.57977	10.0569	8.80851	8.26244	8.47854	10.8001	10.0461	10.6058	8.36266	8.83176	9.73795	12.4494	8.54487	8.73123	8.77324	9.78998	1.01675	0.0131545	TSPYL2	TSPY like 2
ENSG00000233013	FAM157B	family with sequence similarity 157 member B (non-protein coding)	3.31596	0	3.60171	0	0	0	3.91215	0	0	0	0	0	0	0	0	0	1.54712	0	-1.54712	0.0131651	FAM157B	family with sequence similarity 157 member B (non-protein coding)
ENSG00000203705	TATDN3	TatD DNase domain containing 3	6.99136	6.9815	7.12229	8.16242	7.76863	7.59299	8.18361	8.47471	8.34801	8.3029	7.85045	7.74246	8.36074	9.33092	7.7544	7.61114	7.54326	8.1973	0.654043	0.0131729	TATDN3	TatD DNase domain containing 3
ENSG00000230844	ZNF674-AS1	ZNF674 antisense RNA 1 (head to head)	5.63997	5.00247	4.8962	5.59798	6.02033	5.69504	5.01582	6.17632	6.29708	6.34929	5.08945	5.62349	5.73525	7.53916	5.9828	6.21684	5.40969	6.11219	0.702499	0.0131755	ZNF674-AS1	ZNF674 antisense RNA 1 (head to head)
ENSG00000185875	THNSL1	threonine synthase like 1	10.0824	10.3387	9.52949	7.64808	9.10547	9.72047	9.42299	8.61082	7.73099	8.36371	9.96148	9.05607	8.3967	7.96	8.51833	8.9269	9.4068	8.61389	-0.792908	0.0131856	THNSL1	threonine synthase like 1
ENSG00000117054	ACADM	acyl-CoA dehydrogenase, C-4 to C-12 straight chain	12.4542	12.3401	12.6117	10.7349	11.8772	12.3068	11.544	9.68236	10.7475	11.6766	12.1854	11.254	10.7724	10.544	11.9042	11.3678	11.9813	11.126	-0.855244	0.0131858	ACADM	acyl-CoA dehydrogenase, C-4 to C-12 straight chain
ENSG00000167536	DHRS13	dehydrogenase/reductase 13	7.53185	8.43485	9.73205	6.96012	7.47898	8.16615	10.1306	9.90636	8.39254	10.1063	6.98913	11.4174	11.508	10.9278	9.39449	9.4267	8.34781	9.78541	1.4376	0.0131955	DHRS13	dehydrogenase/reductase 13
ENSG00000223374	AC005104.1	---	3.72426	4.77895	2.23676	3.3147	3.5872	3.07639	3.5621	2.71312	3.02689	0	2.2758	2.64384	3.45368	1.58496	0	2.16809	3.46862	1.98515	-1.48347	0.0132125	AC005104.1	---
ENSG00000265354	TIMM23	translocase of inner mitochondrial membrane 23	10.5346	10.2678	9.70984	10.2527	10.2947	10.2457	10.1096	11.0071	10.5175	10.8295	10.147	10.4443	10.474	11.2027	10.203	10.5774	10.2021	10.6003	0.398168	0.013227	TIMM23	translocase of inner mitochondrial membrane 23
ENSG00000260534	AC100827.3	---	3.72426	5.95325	3.70802	2.86097	2.10621	3.60318	3.42361	3.5987	2.8337	1.62842	2.6735	2.64384	2.57969	2.32193	3.54816	2.99794	3.62564	2.75843	-0.867213	0.0132369	AC100827.3	---
ENSG00000146070	PLA2G7	phospholipase A2 group VII	7.56945	7.13105	8.52237	7.94387	7.7466	7.70003	8.46977	6.53445	4.98391	5.42071	7.64975	7.64744	6.72165	7.79442	7.65349	5.8598	7.86902	6.69618	-1.17284	0.013276	PLA2G7	phospholipase A2 group VII
ENSG00000278175	GLIDR	glioblastoma down-regulated RNA	4.47087	4.43984	5.06574	4.84525	5.13578	4.68837	5.99335	6.13888	6.52221	5.01686	5.12166	4.92598	5.9634	7.81378	4.60529	5.83057	4.94846	5.77096	0.822502	0.0132961	GLIDR	glioblastoma down-regulated RNA
ENSG00000181031	RPH3AL	rabphilin 3A like (without C2 domains)	9.32449	7.71653	7.96996	7.55502	7.88079	8.30828	8.31675	8.24294	7.80534	7.63423	7.77652	7.72824	7.76519	6.93074	6.879	7.2519	8.15312	7.55712	-0.595996	0.0133838	RPH3AL	rabphilin 3A like (without C2 domains)
ENSG00000266962	AC067852.2	---	7.55077	7.74	7.94843	7.61553	7.92725	7.61139	7.68183	8.75697	7.85074	8.04173	7.56446	8.55399	8.36074	8.8857	7.80547	7.69462	7.72503	8.16827	0.443239	0.0134245	AC067852.2	---
ENSG00000144158	AL078621.1	---	4.99766	4.58518	4.85051	5.01458	4.45519	4.46374	4.42905	6.73593	5.75804	5.84491	4.44297	4.71147	5.12999	6.33985	4.04966	5.42396	4.68513	5.38187	0.696733	0.0134302	AL078621.1	---
ENSG00000141026	MED9	mediator complex subunit 9	8.71572	8.61069	8.92636	8.33629	8.39218	8.19694	9.08961	11.3773	7.97308	9.53426	7.97024	9.24767	9.62121	10.5216	8.17911	8.43367	8.60969	9.20646	0.596777	0.0135776	MED9	mediator complex subunit 9
ENSG00000229108	MEOX2-AS1	MEOX2 antisense RNA 1 (head to head)	1.78378	3.17812	1.9203	2.19535	0	0	3.09895	1.51221	0	0	1.34316	0	0	0	0	0	1.7395	0.317263	-1.42224	0.0135998	MEOX2-AS1	MEOX2 antisense RNA 1 (head to head)
ENSG00000130810	PPAN	peter pan homolog (Drosophila)	8.14774	8.39597	7.86472	8.88468	8.02203	8.66167	8.15653	9.75375	8.96432	9.33373	7.86002	8.96807	8.91849	9.82337	8.02604	8.30143	8.30476	8.88325	0.578485	0.0136114	PPAN	peter pan homolog (Drosophila)
ENSG00000133997	MED6	mediator complex subunit 6	8.26315	8.3253	8.09278	8.21116	8.22161	8.45305	8.00691	8.65458	8.34801	8.56038	8.26512	8.71405	8.5322	8.90388	8.33061	8.33824	8.22485	8.51634	0.291491	0.0136425	MED6	mediator complex subunit 6
ENSG00000167723	TRPV3	transient receptor potential cation channel subfamily V member 3	7.13203	4.94975	5.75263	6.73621	6.0685	6.00445	5.63375	5.99963	3.48736	3.22758	4.09923	0	6.16034	2.32193	4.20987	5.30148	6.03962	3.86749	-2.17212	0.0136502	TRPV3	transient receptor potential cation channel subfamily V member 3
ENSG00000136854	STXBP1	syntaxin binding protein 1	8.35931	8.67706	8.03778	8.70761	7.85356	8.95614	7.71932	8.19359	7.88231	7.72973	8.42528	7.12513	8.03535	7.20945	7.85479	7.45709	8.33011	7.76808	-0.56203	0.0136746	STXBP1	syntaxin binding protein 1
ENSG00000253333	AC146944.3	---	0	0	0	0	0	0	0	0	2.61058	0	3.24091	0	2.9331	3.70044	1.96996	0	0	1.60611	1.60611	0.0136888	AC146944.3	---
ENSG00000106780	MEGF9	multiple EGF like domains 9	12.4015	12.0641	12.0636	10.3259	11.4969	12.0529	11.8988	10.2471	11.158	11.3838	11.4172	11.1236	11.0022	10.1137	11.5814	11.8171	11.7577	11.0938	-0.663878	0.0137126	MEGF9	multiple EGF like domains 9
ENSG00000230673	PABPC1P3	poly(A) binding protein cytoplasmic 1 pseudogene 3	4.41688	4.09613	3.89967	4.30707	4.5259	4.88269	5.06325	5.02201	4.83696	5.34848	4.49307	4.97497	5.19678	6.06609	4.66181	5.67482	4.45594	5.14166	0.685723	0.0137151	PABPC1P3	poly(A) binding protein cytoplasmic 1 pseudogene 3
ENSG00000203747	FCGR3A	Fc fragment of IgG receptor IIIa	11.3159	11.0973	12.6649	13.0944	11.4328	12.3434	12.3884	10.5379	11.361	10.8848	11.885	12.2471	11.0806	11.0084	12.0588	10.4097	12.0482	11.2748	-0.773328	0.01372	FCGR3A	Fc fragment of IgG receptor IIIa
ENSG00000010327	STAB1	stabilin 1	11.936	11.0566	11.0221	13.2108	10.7537	11.1896	10.7716	11.2371	11.0475	10.7076	11.1883	11.0703	11.2375	10.1098	9.7959	10.7735	11.42	10.7964	-0.623647	0.0137399	STAB1	stabilin 1
ENSG00000105185	PDCD5	programmed cell death 5	9.50512	9.45658	9.31706	10.3329	9.96158	9.69266	9.97507	10.4801	9.94205	10.5675	9.14433	10.3967	10.6444	10.9837	10.0111	10.2014	9.74871	10.2635	0.514764	0.0137423	PDCD5	programmed cell death 5
ENSG00000263961	C1orf186	chromosome 1 open reading frame 186	6.53963	4.77895	4.80333	6.62286	3.71375	4.38036	4.56705	3.89661	5.42229	2.63908	5.15316	3.76551	3.65713	3.45943	4.28377	4.01274	5.05799	4.03219	-1.0258	0.013835	C1orf186	chromosome 1 open reading frame 186
ENSG00000134240	HMGCS2	3-hydroxy-3-methylglutaryl-CoA synthase 2	15.4933	14.6734	13.6914	12.739	14.5692	14.925	14.0087	9.02407	11.5582	13.2261	14.3064	13.4231	11.4531	13.83	13.6919	13.7715	14.3	12.6983	-1.60174	0.0138505	HMGCS2	3-hydroxy-3-methylglutaryl-CoA synthase 2
ENSG00000270872	SRGAP2D	SLIT-ROBO Rho GTPase activating protein 2D (pseudogene)	5.23455	5.36654	6.21605	5.84261	5.66061	6.11175	5.83842	5.28449	5.48943	5.19218	4.67768	4.87527	5.35137	3.70044	5.79341	4.6026	5.75293	4.99632	-0.756612	0.013874	SRGAP2D	SLIT-ROBO Rho GTPase activating protein 2D (pseudogene)
ENSG00000244476	ERVFRD-1	endogenous retrovirus group FRD member 1, envelope	4.66862	4.43984	4.8962	3.93735	0	2.23802	2.67935	1.51221	3.02689	2.0488	2.2758	0	0	2.58496	2.96489	3.1943	3.26563	1.95643	-1.3092	0.0139326	ERVFRD-1	endogenous retrovirus group FRD member 1, envelope
ENSG00000104524	PYCR3	pyrroline-5-carboxylate reductase 3	6.16702	6.70758	6.90482	7.23329	7.56544	7.18965	7.14514	7.59735	7.60796	9.02747	7.1694	8.46677	7.67435	8.12412	6.68811	6.44613	6.98756	7.64463	0.657066	0.0139327	PYCR3	pyrroline-5-carboxylate reductase 3
ENSG00000159079	C21orf59	chromosome 21 open reading frame 59	8.74614	9.03116	7.73242	9.23468	8.81205	8.61683	7.99473	9.53705	9.33443	9.63448	8.76815	8.65139	9.25851	9.47371	8.70136	9.29112	8.59543	9.18335	0.587924	0.0139443	C21orf59	chromosome 21 open reading frame 59
ENSG00000247626	MARS2	methionyl-tRNA synthetase 2, mitochondrial	8.27078	8.23456	8.14102	7.54813	7.92725	8.36902	8.2871	8.91757	8.57364	8.74403	8.21749	8.29896	8.49287	9.44501	8.73468	7.7812	8.11112	8.57838	0.46726	0.0139613	MARS2	methionyl-tRNA synthetase 2, mitochondrial
ENSG00000134962	KLB	klotho beta	12.1855	12.0955	11.8279	8.08845	10.8703	12.1708	10.8472	9.49322	9.81202	9.38202	11.4883	9.99807	10.0674	8.80413	10.7338	11.6299	11.1551	10.1565	-0.998551	0.0139659	KLB	klotho beta
ENSG00000126878	AIF1L	allograft inflammatory factor 1 like	6.21526	5.62373	6.82438	8.79741	3.83009	7.42631	5.99335	3.5987	5.02974	4.23111	4.28131	3.87281	6.31868	6.47573	4.96108	7.11314	6.38722	5.09803	-1.28919	0.014008	AIF1L	allograft inflammatory factor 1 like
ENSG00000224238	WARS2-IT1	WARS2 intronic transcript 1	2.74437	2.15398	2.23676	4.09677	2.70251	2.84716	0	2.49343	0	0	2.02649	0	0	0	0	0	2.39737	0.502214	-1.89515	0.0140096	WARS2-IT1	WARS2 intronic transcript 1
ENSG00000213203	GIMAP1	GTPase, IMAP family member 1	8.06241	8.10193	8.50404	9.87767	7.8258	8.10902	7.59576	6.51996	7.68875	7.11951	8.13312	7.45366	8.15776	7.30378	8.27734	7.87007	8.29666	7.61377	-0.682889	0.0140266	GIMAP1	GTPase, IMAP family member 1
ENSG00000164163	ABCE1	ATP binding cassette subfamily E member 1	10.4472	10.3679	10.8302	11.1771	11.482	11.3399	11.325	11.6972	11.6311	12.2074	11.0726	11.6254	11.5801	12.3382	11.0955	10.7954	10.9956	11.5603	0.564734	0.0140936	ABCE1	ATP binding cassette subfamily E member 1
ENSG00000178385	PLEKHM3	pleckstrin homology domain containing M3	8.90654	8.65253	9.1145	8.4661	8.56583	8.20907	8.66685	8.64125	8.26421	8.4352	8.44132	8.27959	7.97954	8.26679	8.38619	8.24716	8.65449	8.3268	-0.327684	0.0141219	PLEKHM3	pleckstrin homology domain containing M3
ENSG00000131095	GFAP	glial fibrillary acidic protein	7.55077	7.40025	8.10742	6.90732	5.83782	5.94765	5.35762	6.83289	4.61439	4.9205	4.95293	4.59094	6.3336	6.84549	10.3692	5.64154	6.72984	6.12239	-0.607446	0.0141387	GFAP	glial fibrillary acidic protein
ENSG00000070081	NUCB2	nucleobindin 2	11.8026	12.2628	11.677	11.367	11.6313	11.8489	12.2853	12.0509	12.089	12.4573	11.6146	12.2862	12.4161	12.584	12.3002	12.674	11.8393	12.2747	0.435439	0.0141655	NUCB2	nucleobindin 2
ENSG00000186732	MPPED1	metallophosphoesterase domain containing 1	7.6995	8.43005	6.70108	8.09791	8.27903	10.4358	8.03096	8.62442	9.03063	9.69943	8.33202	8.60546	7.9264	8.30834	8.2126	8.63306	8.23919	8.59693	0.357738	0.0141669	MPPED1	metallophosphoesterase domain containing 1
ENSG00000263001	GTF2I	general transcription factor IIi	11.2455	11.6896	12.1113	11.0075	11.2438	11.6267	11.0194	10.4996	11.1068	10.9458	11.3212	11.3872	10.6264	9.92333	11.226	10.8039	11.4205	10.8711	-0.549411	0.0142728	GTF2I	general transcription factor IIi
ENSG00000164934	DCAF13	DDB1 and CUL4 associated factor 13	9.49213	9.40121	9.26794	9.78558	9.89134	9.67964	9.82495	10.7049	10.423	10.7229	9.50023	10.0157	10.0116	10.5971	9.38613	9.41444	9.6204	10.0862	0.465831	0.0142965	DCAF13	DDB1 and CUL4 associated factor 13
ENSG00000168894	RNF181	ring finger protein 181	9.82179	9.83461	9.36253	9.29759	9.62961	9.47631	9.87065	9.78135	10.0586	10.5645	9.29667	9.97116	10.1328	10.4147	9.703	10.1842	9.6133	10.0119	0.398581	0.0143113	RNF181	ring finger protein 181
ENSG00000148291	SURF2	surfeit 2	7.47355	7.85913	7.75739	7.89588	7.29889	7.26132	7.41564	8.19359	8.29738	8.05314	7.24444	8.10902	7.74301	8.28077	7.66044	8.37919	7.56597	7.99566	0.429691	0.0143166	SURF2	surfeit 2
ENSG00000115602	IL1RL1	interleukin 1 receptor like 1	9.64083	6.26513	4.54103	8.58855	7.09307	8.2151	8.10081	12.1356	9.13916	5.45551	4.28131	10.8459	11.5296	13.4432	6.31785	5.53685	7.49207	8.74278	1.25071	0.0143329	IL1RL1	interleukin 1 receptor like 1
ENSG00000274308	AC244093.1	---	1.78378	0	1.9203	0	1.67975	0	3.09895	0	0	0	0	0	0	0	0	0	1.21183	0	-1.21183	0.0143526	AC244093.1	---
ENSG00000137168	PPIL1	peptidylprolyl isomerase like 1	9.68717	10.257	9.63769	10.0653	9.79263	9.96724	10.1334	10.5433	10.4046	11.164	9.47084	10.8873	11.1881	10.6671	9.71641	9.78582	9.93435	10.4253	0.490931	0.0143715	PPIL1	peptidylprolyl isomerase like 1
ENSG00000259670	AC012379.1	---	6.82516	6.1295	2.49613	0	0	3.74326	0	3.80397	0	1.62842	2.02649	2.05309	0	0	2.28986	2.50056	2.74201	1.58916	-1.15285	0.014392	AC012379.1	---
ENSG00000272864	AC135803.1	---	5.63997	5.10245	3.70802	4.30707	4.83525	4.19758	4.10576	4.06574	3.48736	4.38346	4.28131	3.87281	3.91692	3.58496	3.2858	3.78789	4.55659	3.85181	-0.70478	0.014434	AC135803.1	---
ENSG00000115641	FHL2	four and a half LIM domains 2	8.20859	7.56704	6.91595	8.53037	7.21578	7.59299	7.80551	9.26248	7.68159	7.05289	8.10521	7.26957	10.0197	10.1536	7.86084	8.16172	7.69089	8.3964	0.70551	0.0144398	FHL2	four and a half LIM domains 2
ENSG00000139154	AEBP2	AE binding protein 2	8.35213	8.2992	8.72586	8.7945	8.76532	8.61227	8.68969	9.03431	8.71361	8.87192	8.64338	8.72125	8.8527	9.20945	9.04999	9.00747	8.60557	8.90045	0.294885	0.0144762	AEBP2	AE binding protein 2
ENSG00000163960	UBXN7	UBX domain protein 7	9.51319	9.70939	10.1047	9.01768	9.3829	9.10965	9.4896	8.99294	8.96137	8.7156	9.20007	9.06741	8.84751	9.18488	9.5106	9.3308	9.4753	9.09013	-0.385171	0.0144926	UBXN7	UBX domain protein 7
ENSG00000181619	GPR135	G protein-coupled receptor 135	4.47087	4.6527	3.60171	4.97408	4.6577	3.07639	4.86342	5.72435	4.48874	4.76271	4.72037	4.52667	5.94408	6.79442	5.35309	4.6026	4.32812	5.213	0.88488	0.0145565	GPR135	G protein-coupled receptor 135
ENSG00000183696	UPP1	uridine phosphorylase 1	7.9576	8.02757	7.10293	8.58183	8.21627	8.00151	8.36958	9.89096	8.979	7.94708	7.93896	8.24005	9.15523	9.75822	7.96559	8.16172	8.03676	8.67076	0.633999	0.014561	UPP1	uridine phosphorylase 1
ENSG00000175768	TOMM5	translocase of outer mitochondrial membrane 5	10.1103	5.95325	9.23941	8.774	8.3194	9.88644	9.3603	10.1481	10.2303	10.3753	9.34691	9.56413	9.94884	10.9016	9.69117	10.2269	8.80616	10.0481	1.24198	0.0145624	TOMM5	translocase of outer mitochondrial membrane 5
ENSG00000273478	AC099676.1	---	5.10398	5.24053	3.98673	4.97408	4.13159	5.3453	4.86342	6.30019	4.78445	4.64703	5.05652	5.59244	7.72615	4.80735	5.09025	6.30449	4.80652	5.58987	0.783356	0.0145984	AC099676.1	---
ENSG00000280537	AC068946.1	---	4.04213	5.24053	0	0	2.10621	2.84716	3.42361	0	0	1.03271	0	0	2.9331	0	0	0	2.52281	0.440646	-2.08216	0.0146131	AC068946.1	---
ENSG00000132661	NXT1	nuclear transport factor 2 like export factor 1	6.67227	7.47676	7.16957	7.66726	7.81878	7.43666	7.65112	7.94516	7.59277	8.35912	6.92671	8.1994	8.60163	8.84235	7.61106	7.67831	7.4132	7.97295	0.559742	0.0146284	NXT1	nuclear transport factor 2 like export factor 1
ENSG00000142856	ITGB3BP	integrin subunit beta 3 binding protein	7.75494	6.9815	6.63524	7.53427	8.69418	7.9662	5.56952	5.95725	7.40555	6.89704	5.91114	5.82398	5.84344	7.76818	6.08967	5.80074	7.30512	6.38855	-0.916567	0.0146561	ITGB3BP	integrin subunit beta 3 binding protein
ENSG00000144445	KANSL1L	KAT8 regulatory NSL complex subunit 1 like	9.68289	10.0345	9.43784	8.88468	8.70184	8.94167	8.74163	8.3244	8.63053	8.03023	8.79586	8.38756	8.5061	7.43463	8.58926	9.69751	9.20358	8.48845	-0.715131	0.014671	KANSL1L	KAT8 regulatory NSL complex subunit 1 like
ENSG00000105193	RPS16	ribosomal protein S16	11.6898	11.9679	11.1782	11.998	11.9854	11.3625	11.8293	12.1665	12.6691	12.7492	11.3294	11.8513	12.2657	12.4719	11.9446	12.1883	11.7159	12.1818	0.465912	0.014684	RPS16	ribosomal protein S16
ENSG00000141096	DPEP3	dipeptidase 3	1.78378	2.15398	2.90658	2.6713	0	0	0	0	0	0	0	0	0	1	0	0	1.35938	0.111111	-1.24827	0.0147252	DPEP3	dipeptidase 3
ENSG00000089351	GRAMD1A	GRAM domain containing 1A	8.79721	8.06523	9.12414	9.1463	9.30714	8.43766	9.69737	10.5708	9.04744	8.66073	9.21133	9.95446	10.3702	10.1886	9.06054	9.32819	8.93929	9.59913	0.659841	0.0147396	GRAMD1A	GRAM domain containing 1A
ENSG00000134809	TIMM10	translocase of inner mitochondrial membrane 10	8.10997	8.77879	7.943	8.01048	8.53187	8.26244	8.36012	8.4822	8.98773	10.4034	7.80159	9.163	8.47616	9.54496	8.55237	8.26911	8.28524	8.85339	0.568152	0.0147442	TIMM10	translocase of inner mitochondrial membrane 10
ENSG00000101421	CHMP4B	charged multivesicular body protein 4B	10.9649	10.4755	10.5906	10.8379	10.6176	10.5487	11.0179	11.7029	11.0236	11.0261	10.5563	10.8656	11.3938	12.4014	10.8607	10.9681	10.7219	11.1998	0.477947	0.0147754	CHMP4B	charged multivesicular body protein 4B
ENSG00000137070	IL11RA	interleukin 11 receptor subunit alpha	9.27034	8.8914	7.93207	8.72907	8.07604	8.39581	7.88684	6.50533	8.09667	7.45664	8.41232	7.18881	7.42555	6.71425	8.1547	8.62882	8.45451	7.62034	-0.834166	0.014798	IL11RA	interleukin 11 receptor subunit alpha
ENSG00000224032	EPB41L4A-AS1	EPB41L4A antisense RNA 1	5.77484	6.3891	7.11264	7.06991	7.63906	5.66012	7.91296	6.67185	9.42296	8.30767	6.41851	6.71354	7.87123	8.633	7.67424	7.91949	6.79409	7.73694	0.942853	0.0148126	EPB41L4A-AS1	EPB41L4A antisense RNA 1
ENSG00000173212	MAB21L3	mab-21 like 3	4.24164	4.09613	4.42112	3.3147	5.59635	2.23802	5.31907	4.64858	5.96093	5.76393	4.09923	6.7279	5.491	7.69349	3.86941	3.90469	4.17529	5.35102	1.17572	0.0148463	MAB21L3	mab-21 like 3
ENSG00000163661	PTX3	pentraxin 3	3.05829	3.88773	4.85051	5.84261	5.72213	4.68837	7.32127	11.2354	5.02974	5.42071	5.38309	4.65247	9.58893	12.2186	5.31835	3.52141	5.05299	6.92986	1.87687	0.0148661	PTX3	pentraxin 3
ENSG00000214736	TOMM6	translocase of outer mitochondrial membrane 6	4.11174	1.72262	4.06883	7.79484	7.48786	4.61731	8.00083	10.742	4.72996	10.7202	6.40549	4.38886	10.0562	10.825	6.6467	6.21684	5.40058	7.85902	2.45845	0.0148835	TOMM6	translocase of outer mitochondrial membrane 6
ENSG00000237510	GPAT2P1	glycerol-3-phosphate acyltransferase 2 pseudogene 1	0	0	2.90658	0	4.30245	0	3.42361	0	0	0	0	0	0	0	0	0	1.51895	0	-1.51895	0.0149096	GPAT2P1	glycerol-3-phosphate acyltransferase 2 pseudogene 1
ENSG00000136048	DRAM1	DNA damage regulated autophagy modulator 1	6.23099	7.09509	8.37686	9.26017	7.72422	7.11424	8.7489	8.78147	9.05854	7.92241	8.39596	10.6421	8.37883	8.66888	9.55605	8.64989	7.79292	8.8949	1.10198	0.0149186	DRAM1	DNA damage regulated autophagy modulator 1
ENSG00000161031	PGLYRP2	peptidoglycan recognition protein 2	9.69144	10.7016	9.56706	7.98522	9.06152	10.896	8.79879	7.91225	8.63424	8.45683	10.0224	8.64762	7.15022	7.74147	9.23599	9.46287	9.5288	8.58488	-0.943922	0.014941	PGLYRP2	peptidoglycan recognition protein 2
ENSG00000260091	AC093752.3	---	1.39443	0	1.51434	1.88167	0	3.44802	0	0	0	0	0	0	0	0	0	0	1.17692	0	-1.17692	0.0149463	AC093752.3	---
ENSG00000173653	RCE1	Ras converting CAAX endopeptidase 1	7.35654	6.30765	6.00287	7.06991	7.19423	6.21161	6.75532	7.79079	6.98464	7.70101	7.65526	7.47084	7.89657	7.57743	6.60407	6.46527	6.69973	7.34954	0.64981	0.0149743	RCE1	Ras converting CAAX endopeptidase 1
ENSG00000010072	SPRTN	SprT-like N-terminal domain	7.07217	7.24482	7.7387	7.48467	7.7466	7.85478	7.7267	7.72284	8.17014	7.8782	7.69326	8.08691	7.84023	8	7.95432	7.84105	7.55263	7.90966	0.357026	0.0149787	SPRTN	SprT-like N-terminal domain
ENSG00000157657	ZNF618	zinc finger protein 618	7.44011	8.38608	6.98101	8.47339	8.47045	8.85552	8.91966	7.50474	7.18023	6.5718	7.48003	7.10327	7.13326	8.37504	7.55993	8.45776	8.21803	7.48512	-0.732914	0.0149804	ZNF618	zinc finger protein 618
ENSG00000156284	CLDN8	claudin 8	1.78378	0	0	2.86097	2.10621	0	1.66096	0	0	0	0	0	0	0	0	0	1.2017	0	-1.2017	0.0149905	CLDN8	claudin 8
ENSG00000184911	DMRTC1B	DMRT like family C1B	1.78378	0	0	2.86097	2.10621	0	1.66096	0	0	0	0	0	0	0	0	0	1.2017	0	-1.2017	0.0149905	DMRTC1B	DMRT like family C1B
ENSG00000132846	ZBED3	zinc finger BED-type containing 3	11.5904	9.45894	9.13609	8.87921	9.10258	10.5642	8.77049	8.17983	9.29977	9.07301	9.18681	8.94366	8.61085	8.48382	9.20304	10.0762	9.64312	9.00634	-0.636788	0.0150536	ZBED3	zinc finger BED-type containing 3
ENSG00000108604	SMARCD2	SWI/SNF related, matrix associated, actin dependent regulator of chromatin, subfamily d, member 2	11.3492	10.8944	10.0105	10.2206	10.1787	10.7312	9.8215	9.98495	10.2316	9.71028	10.5031	10.0703	9.83025	9.7879	10.141	9.92887	10.458	10.0209	-0.437097	0.0150606	SMARCD2	SWI/SNF related, matrix associated, actin dependent regulator of chromatin, subfamily d, member 2
ENSG00000228929	RPS13P2	ribosomal protein S13 pseudogene 2	5.91774	6.03144	5.10519	5.88692	6.11511	5.54995	6.28097	6.11979	6.86332	6.87149	5.75566	5.90205	6.31868	6.67243	6.30016	6.81784	5.84105	6.40238	0.561333	0.0150832	RPS13P2	ribosomal protein S13 pseudogene 2
ENSG00000012817	KDM5D	lysine demethylase 5D	9.68575	9.85805	9.60882	10.0761	9.7508	9.9052	9.59621	9.13281	9.20806	9.48246	9.68533	8.99207	9.56859	8.83289	9.71974	9.78201	9.78299	9.37822	-0.404778	0.0150891	KDM5D	lysine demethylase 5D
ENSG00000029993	HMGB3	high mobility group box 3	10.8236	10.3729	10.619	9.94864	10.4674	9.91264	11.2437	13.3909	11.4246	11.315	10.237	11.1485	10.57	12.242	10.3639	9.44611	10.484	11.1264	0.642462	0.0151539	HMGB3	high mobility group box 3
ENSG00000260404	AC110079.1	---	5.13774	6.76973	5.93881	6.88564	6.09199	5.69504	6.68126	6.95639	7.3159	7.01839	6.71084	6.33626	7.55849	6.78136	6.33533	6.99954	6.17146	6.89028	0.718816	0.0151749	AC110079.1	---
ENSG00000104671	DCTN6	dynactin subunit 6	9.73208	9.40121	9.44747	9.88725	9.75265	9.60355	9.80938	10.3428	9.87458	10.3489	9.55136	9.85329	10.0494	10.8138	9.66029	9.93404	9.66194	10.0476	0.385665	0.0152121	DCTN6	dynactin subunit 6
ENSG00000272129	AL359715.4	---	5.75322	5.87058	5.21744	4.84525	5.89237	5.91839	3.80463	4.80016	4.42156	4.58551	5.38309	4.45941	3.45368	4.32193	4.76861	5.07096	5.32884	4.58499	-0.743849	0.015245	AL359715.4	---
ENSG00000231084	AL136133.1	---	0	2.15398	1.9203	2.45286	2.10621	2.23802	2.90435	2.90374	2.02308	3.86753	3.45824	2.64384	3.45368	3.45943	2.77297	3.1943	1.96796	3.08631	1.11835	0.0152668	AL136133.1	---
ENSG00000169313	P2RY12	purinergic receptor P2Y12	3.19287	6.73899	7.86472	8.44032	5.1803	5.97633	5.56952	3.48395	6.31571	5.10718	6.05149	5.52824	4.26701	3.45943	6.75459	4.11325	6.13758	5.00898	-1.12859	0.015274	P2RY12	purinergic receptor P2Y12
ENSG00000158813	EDA	ectodysplasin A	6.30715	6.78486	7.66802	7.90669	6.56466	6.861	6.32054	5.56412	7.00773	6.23375	6.58944	5.68367	5.43676	6.70044	6.57493	6.14742	6.91613	6.21536	-0.700768	0.0152999	EDA	ectodysplasin A
ENSG00000231767	AL136454.1	---	6.04776	6.52143	6.6751	7.03095	6.54777	6.16254	6.6032	6.68489	7.71002	7.54008	6.62357	7.0356	7.20803	7.12928	6.83052	6.44613	6.51268	7.02313	0.510448	0.015315	AL136454.1	---
ENSG00000125144	MT1G	metallothionein 1G	11.149	10.6996	12.3263	10.9993	10.4113	13.3973	11.9138	13.0288	12.0513	10.6317	12.2911	11.8745	12.7582	15.168	12.0376	13.9731	11.5567	12.646	1.08939	0.0153543	MT1G	metallothionein 1G
ENSG00000104324	CPQ	carboxypeptidase Q	10.7981	10.832	11.409	10.1092	10.2059	10.3521	10.4002	9.96503	9.79884	9.89911	10.6912	10.5521	10.0774	9.79442	10.0994	10.2751	10.5866	10.1281	-0.458579	0.0154068	CPQ	carboxypeptidase Q
ENSG00000106077	ABHD11	abhydrolase domain containing 11	6.40745	6.28655	5.77726	7.10785	6.78247	6.30501	6.43312	7.71013	7.1285	7.0067	6.98038	6.33626	6.77727	7.57743	6.66063	6.90455	6.44282	7.0091	0.56628	0.0154628	ABHD11	abhydrolase domain containing 11
ENSG00000275097	AC024940.5	---	0.859513	1.10446	1.51434	3.85051	2.70251	1.16296	1.05737	1.91789	3.19724	1.62842	1.34316	1.03561	5.54327	5.64386	1.55829	5.70734	1.75024	3.0639	1.31366	0.0154736	AC024940.5	---
ENSG00000074527	NTN4	netrin 4	10.2806	11.0798	10.8829	10.6706	9.73597	10.5088	10.5461	9.37543	10.0805	9.23702	10.673	9.81007	8.71706	10.4767	9.82248	7.21844	10.5292	9.49008	-1.03916	0.0155022	NTN4	netrin 4
ENSG00000160961	ZNF333	zinc finger protein 333	6.80428	6.55711	6.23395	6.3337	7.22643	6.87629	5.99335	8.05475	7.86976	7.04148	6.54263	6.59318	6.92249	7.71425	6.86703	6.99954	6.57502	7.17835	0.603328	0.0155094	ZNF333	zinc finger protein 333
ENSG00000177406	AC021054.1	---	8.94995	7.97578	8.09278	7.78902	7.89422	6.3713	8.26191	7.61109	8.15987	7.33108	6.97157	6.25925	7.36149	6.76818	6.94881	7.63669	7.90499	7.22756	-0.677436	0.0155319	AC021054.1	---
ENSG00000198829	SUCNR1	succinate receptor 1	9.0308	9.62365	9.4301	8.00043	7.90752	9.01951	7.52977	2.49343	7.83146	7.51555	8.50069	8.05309	6.69879	7.9542	8.29978	7.31658	8.64882	7.18484	-1.46399	0.0155452	SUCNR1	succinate receptor 1
ENSG00000061938	TNK2	tyrosine kinase non receptor 2	9.52759	8.44916	9.5741	9.00768	9.30714	10.4032	8.79879	8.03451	8.55417	8.61143	8.86169	8.7567	8.67082	7.79442	9.58007	9.09304	9.29538	8.66187	-0.633506	0.0155726	TNK2	tyrosine kinase non receptor 2
ENSG00000223960	AC009948.1	---	5.87834	6.00584	5.72757	6.47103	6.94611	5.85802	5.50228	5.44648	5.96093	5.61795	5.62695	4.97497	5.66622	5.61471	5.28275	5.60748	6.0556	5.53316	-0.522441	0.0155934	AC009948.1	---
ENSG00000153982	GDPD1	glycerophosphodiester phosphodiesterase domain containing 1	6.21526	4.7172	4.54103	4.37087	5.49424	4.75609	6.24028	5.17779	5.15911	4.06074	4.28131	4.59094	3.83541	4.32193	4.42109	4.45718	5.19071	4.47839	-0.712323	0.0155977	GDPD1	glycerophosphodiester phosphodiesterase domain containing 1
ENSG00000278292	RFPL4AP6	ret finger protein like 4A pseudogene 6	0	0	4.29034	0	2.43495	3.87094	0	0	0	0	0	0	0	0	0	0	1.51375	0	-1.51375	0.0155996	RFPL4AP6	ret finger protein like 4A pseudogene 6
ENSG00000273136	NBPF26	NBPF member 26	9.24346	9.31265	9.12173	9.02017	9.02536	9.36955	9.19183	8.98241	8.75172	8.76846	9.22065	8.998	9.08644	8.98868	8.81476	8.77408	9.18354	8.93169	-0.251846	0.0156034	NBPF26	NBPF member 26
ENSG00000224861	YBX1P1	Y-box binding protein 1 pseudogene 1	8.31572	8.57633	8.58996	8.57507	8.27903	8.6077	8.57577	8.78147	9.24253	9.29582	8.19875	8.70319	8.8885	8.98584	8.75756	8.69924	8.5028	8.83921	0.336414	0.0156342	YBX1P1	Y-box binding protein 1 pseudogene 1
ENSG00000241935	HOGA1	4-hydroxy-2-oxoglutarate aldolase 1	10.5258	9.86518	7.55149	8.35613	8.77986	9.30035	8.16199	6.61845	8.7101	8.09788	9.34521	6.86416	6.65194	8.32643	7.45188	8.90253	8.9344	7.8854	-1.049	0.0156428	HOGA1	4-hydroxy-2-oxoglutarate aldolase 1
ENSG00000152760	TCTEX1D1	Tctex1 domain containing 1	5.77484	5.55481	5.25299	4.17033	5.49424	5.3453	5.60199	6.08084	3.19724	3.96737	6.61228	3.38541	3.55899	3.90689	3.77007	2.99794	5.3135	4.16411	-1.14939	0.0156809	TCTEX1D1	Tctex1 domain containing 1
ENSG00000184344	GDF3	growth differentiation factor 3	0	0	0	0	0	0	0	0	2.61058	0	2.6735	0	2.36413	0	3.54816	2.50056	0	1.52188	1.52188	0.0157044	GDF3	growth differentiation factor 3
ENSG00000075914	EXOSC7	exosome component 7	8.95232	8.90184	9.03503	8.68582	8.97886	9.1161	9.08961	9.30112	9.24496	9.77716	8.86169	9.14438	9.26242	9.97441	9.38822	8.93723	8.96566	9.32129	0.35563	0.0157478	EXOSC7	exosome component 7
ENSG00000138463	DIRC2	disrupted in renal carcinoma 2	8.35931	7.85913	8.44761	8.09319	8.30941	7.9662	8.43414	9.54064	8.40129	8.89111	8.28303	8.49643	8.40025	9.73978	8.72145	7.85563	8.20986	8.70329	0.493434	0.0157717	DIRC2	disrupted in renal carcinoma 2
ENSG00000148225	WDR31	WD repeat domain 31	6.63728	6.96831	5.96048	5.23631	6.59786	6.68105	6.76969	6.64539	4.78445	5.70729	5.40942	6.59318	5.16377	5.55459	5.13086	5.12011	6.40728	5.56767	-0.839609	0.0158081	WDR31	WD repeat domain 31
ENSG00000164220	F2RL2	coagulation factor II thrombin receptor like 2	3.5345	5.51907	8.1315	7.6545	6.85292	7.41588	8.06631	5.64646	4.93657	5.55515	7.03213	6.21915	6.00126	6.78136	6.53009	5.5726	6.73924	6.03053	-0.708711	0.0158389	F2RL2	coagulation factor II thrombin receptor like 2
ENSG00000279970	AC023024.2	---	9.44571	8.54557	8.53686	6.14589	5.66061	7.90785	8.0779	6.38257	7.34338	7.01839	7.66075	7.85141	7.08999	6.88264	6.67444	7.63669	7.76006	7.17114	-0.588913	0.0158409	AC023024.2	---
ENSG00000157992	KRTCAP3	keratinocyte associated protein 3	5.32526	6.05659	5.44969	5.42845	6.24654	6.08566	4.96679	6.35018	6.43973	5.92159	6.01766	6.40937	5.66622	6.02237	6.4994	7.27378	5.65128	6.28892	0.637641	0.0158431	KRTCAP3	keratinocyte associated protein 3
ENSG00000189343	AC004448.1	---	8.61143	8.92592	8.79081	8.95141	9.20848	8.31952	9.27978	9.1423	10.071	9.71388	8.45402	9.78281	9.34756	9.53528	9.19109	8.90954	8.86962	9.34971	0.480094	0.015858	AC004448.1	---
ENSG00000213598	AL049873.1	---	4.80095	5.05333	3.70802	4.5469	4.83525	4.19758	5.31907	4.47919	5.67394	5.58689	5.24373	5.42624	5.46413	5.88264	4.76861	5.50019	4.6373	5.33617	0.698875	0.0158685	AL049873.1	---
ENSG00000166938	DIS3L	DIS3 like exosome 3-5 exoribonuclease	9.93895	10.5393	10.1372	9.41573	9.74155	10.1577	9.84374	9.56906	9.66728	9.81282	10.1509	9.36717	9.28753	9.32643	9.35647	9.54164	9.96774	9.56437	-0.403372	0.0158686	DIS3L	DIS3 like exosome 3-5 exoribonuclease
ENSG00000205822	TPTE2P6	transmembrane phosphoinositide 3-phosphatase and tensin homolog 2 pseudogene 6	1.39443	0	0	2.6713	0	3.44802	2.08522	0	0	0	0	0	0	0	0	1.11421	1.37128	0.123801	-1.24748	0.0158746	TPTE2P6	transmembrane phosphoinositide 3-phosphatase and tensin homolog 2 pseudogene 6
ENSG00000160214	RRP1	ribosomal RNA processing 1	8.28967	8.67706	8.73846	8.8571	9.1425	8.67922	9.03119	8.82926	9.34353	9.70487	8.43813	9.46687	9.58738	9.70736	8.94288	8.89549	8.7736	9.21286	0.439261	0.0158748	RRP1	ribosomal RNA processing 1
ENSG00000170312	CDK1	cyclin dependent kinase 1	2.74437	4.94975	4.48232	6.47103	8.23222	8.34173	3.80463	4.28722	3.83588	3.96737	7.28766	4.15378	4.54853	4.52356	4.28377	4.67016	5.57515	4.61755	-0.957604	0.0159149	CDK1	cyclin dependent kinase 1
ENSG00000154930	ACSS1	acyl-CoA synthetase short chain family member 1	8.98747	7.6354	8.15048	9.56297	7.89422	9.21267	9.42753	9.29049	8.86035	9.10898	10.923	10.4712	9.52213	9.61471	8.90533	8.99435	8.69582	9.52117	0.82535	0.0159503	ACSS1	acyl-CoA synthetase short chain family member 1
ENSG00000138668	HNRNPD	heterogeneous nuclear ribonucleoprotein D	11.0817	10.81	10.8309	11.9913	11.7356	11.204	11.3347	11.967	11.8251	11.964	11.2736	11.8257	11.7513	12.1712	11.497	11.7322	11.284	11.7786	0.494523	0.0159563	HNRNPD	heterogeneous nuclear ribonucleoprotein D
ENSG00000174021	GNG5	G protein subunit gamma 5	10.6891	10.3552	9.78918	10.4511	10.1732	10.126	10.0193	11.0013	10.4674	10.5434	10.1253	10.6335	11.051	11.117	9.97247	11.1033	10.229	10.6683	0.439258	0.0159577	GNG5	G protein subunit gamma 5
ENSG00000144867	SRPRB	SRP receptor beta subunit	10.9555	11.0067	10.588	11.2542	11.0765	10.9147	11.3323	11.9256	11.2486	12.5341	10.2589	11.7953	11.5652	12.5534	10.7728	11.215	11.0183	11.541	0.522728	0.0159715	SRPRB	SRP receptor beta subunit
ENSG00000211790	TRAV8-4	T-cell receptor alpha variable 8-4	0	0	0	3.85051	3.5872	3.07639	0	0	0	0	0	0	0	0	0	0	1.50201	0	-1.50201	0.0159837	TRAV8-4	T-cell receptor alpha variable 8-4
ENSG00000272774	AC112219.2	---	3.81053	2.75508	0	2.86097	1.67975	2.23802	0	0	1.6055	1.03271	1.72491	0	0	0	0	0	1.90634	0.484792	-1.42154	0.0159963	AC112219.2	---
ENSG00000249353	NPM1P27	nucleophosmin 1 pseudogene 27	7.64771	8.18411	7.76972	8.11664	8.58251	8.22708	7.78444	9.03939	8.53443	9.58032	7.80159	8.45387	8.3461	9.07682	8.2314	8.01353	8.0446	8.56416	0.51956	0.0160784	NPM1P27	nucleophosmin 1 pseudogene 27
ENSG00000126860	EVI2A	ecotropic viral integration site 2A	7.89973	7.75544	8.1831	9.80014	6.73849	7.34067	8.27708	7.10938	7.35243	6.72229	7.41655	6.7279	6.971	7.07682	8.48348	7.86287	7.99924	7.30252	-0.696712	0.016093	EVI2A	ecotropic viral integration site 2A
ENSG00000211934	IGHV1-2	immunoglobulin heavy variable 1-2	3.19287	6.30765	4.14651	9.95125	3.12318	5.15772	8.27204	3.35928	5.11726	4.23111	5.8926	3.52354	7.4325	5.32193	5.17036	5.12011	5.73589	5.01874	-0.717145	0.0161432	IGHV1-2	immunoglobulin heavy variable 1-2
ENSG00000177465	ACOT4	acyl-CoA thioesterase 4	8.56254	8.77501	7.55861	7.78317	8.87095	8.55163	9.03119	9.98098	8.91021	9.36152	8.95624	8.75319	9.14892	9.4818	8.49907	8.46729	8.44759	9.06214	0.614551	0.0161871	ACOT4	acyl-CoA thioesterase 4
ENSG00000139547	RDH16	retinol dehydrogenase 16 (all-trans)	13.9009	14.6764	11.7693	11.2989	12.2868	14.2434	12.3443	12.0055	10.3838	12.6063	13.5009	12.3869	11.5063	10.8849	12.7762	12.1156	12.9314	12.0185	-0.912949	0.016231	RDH16	retinol dehydrogenase 16 (all-trans)
ENSG00000213943	KRT18P17	keratin 18 pseudogene 17	0	2.15398	1.51434	0	2.43495	1.7984	2.08522	3.07208	3.34958	3.38029	1.72491	3.23264	2.57969	3.32193	1.55829	2.16809	1.4267	2.70972	1.28302	0.016239	KRT18P17	keratin 18 pseudogene 17
ENSG00000136783	NIPSNAP3A	nipsnap homolog 3A	9.68717	10.593	9.39671	9.30577	9.81044	10.0871	9.20775	8.88119	8.88238	9.23702	9.96037	9.70509	8.65606	9.15987	8.85167	9.31242	9.72685	9.1829	-0.543952	0.0162504	NIPSNAP3A	nipsnap homolog 3A
ENSG00000251322	SHANK3	SH3 and multiple ankyrin repeat domains 3	9.3589	9.43756	8.84132	9.65714	8.49269	9.52079	8.89694	9.02407	9.41219	8.54026	8.6978	8.16287	8.1868	8.74147	8.85773	8.04568	9.17219	8.62988	-0.542314	0.0162707	SHANK3	SH3 and multiple ankyrin repeat domains 3
ENSG00000162840	MT2P1	metallothionein 2 pseudogene 1	2.09008	0	2.71591	2.45286	1.07167	3.07639	2.90435	4.98028	3.02689	2.63908	2.6735	2.64384	2.57969	4.75489	2.77297	3.66079	2.04447	3.30355	1.25908	0.0162991	MT2P1	metallothionein 2 pseudogene 1
ENSG00000151726	ACSL1	acyl-CoA synthetase long chain family member 1	16.1557	15.3729	15.6834	13.729	14.5914	15.8304	14.6849	14.7301	12.6196	13.4034	14.9674	14.5568	14.1676	14.7061	14.5499	15.1164	15.1497	14.313	-0.836632	0.0163589	ACSL1	acyl-CoA synthetase long chain family member 1
ENSG00000243955	GSTA1	glutathione S-transferase alpha 1	11.6402	14.3436	10.4426	11.9394	9.15928	11.9786	7.10038	8.11865	10.2571	11.659	11.4907	7.47935	6.8517	7.19967	10.7526	8.76252	10.9434	9.17458	-1.76885	0.0164172	GSTA1	glutathione S-transferase alpha 1
ENSG00000266028	SRGAP2	SLIT-ROBO Rho GTPase activating protein 2	9.05309	9.05632	9.40661	9.39861	8.65134	9.24249	8.9703	8.55861	9.09941	8.10886	8.99153	8.5337	9.01651	7.82018	8.69122	8.81942	9.11125	8.6266	-0.484646	0.0164317	SRGAP2	SLIT-ROBO Rho GTPase activating protein 2
ENSG00000174469	CNTNAP2	contactin associated protein like 2	7.95286	9.64453	9.09014	7.47018	9.03145	8.57056	8.67068	6.65868	6.9493	7.8126	8.94279	7.68473	7.73179	7.07682	7.88478	8.89549	8.63291	7.73744	-0.895471	0.016447	CNTNAP2	contactin associated protein like 2
ENSG00000099219	ERMP1	endoplasmic reticulum metallopeptidase 1	10.2529	9.59389	9.16903	8.84311	8.57002	9.38032	9.85389	9.56906	8.40998	7.71544	9.45828	8.95897	9.10829	7.86419	7.45188	7.2519	9.38045	8.42089	-0.959563	0.0164589	ERMP1	endoplasmic reticulum metallopeptidase 1
ENSG00000260267	AC026471.1	---	4.99766	5.36654	5.50971	5.4872	6.24654	5.47154	5.60199	6.49054	5.27782	6.98304	6.26838	6.66957	5.75755	7.07682	5.04846	5.91654	5.52588	6.16541	0.63953	0.016481	AC026471.1	---
ENSG00000244021	AC093591.1	---	7.37081	7.55826	7.25973	8.18034	7.5904	7.41588	7.4956	7.9879	8.41862	8.68293	7.41005	7.64744	8.13239	8.55842	7.85479	7.58512	7.553	8.03085	0.477848	0.0164849	AC093591.1	---
ENSG00000169241	SLC50A1	solute carrier family 50 member 1	9.46412	9.91244	9.26794	8.50216	9.58684	9.37225	10.1637	10.614	9.5205	9.83612	9.52602	10.4861	10.2406	9.94691	9.75589	10.4232	9.46706	10.0388	0.571758	0.0164854	SLC50A1	solute carrier family 50 member 1
ENSG00000183520	UTP11	UTP11, small subunit processome component	9.04866	9.25135	9.38273	8.8403	9.54276	9.47881	9.36504	9.65941	9.8038	9.97002	8.88767	9.47541	10.0058	10.5784	9.58191	9.39211	9.27281	9.70606	0.433253	0.0164951	UTP11	UTP11, small subunit processome component
ENSG00000267265	AC011476.3	---	3.19287	1.72262	1.51434	2.45286	2.70251	2.23802	2.67935	5.06256	2.8337	0	3.81405	3.87281	2.9331	4.32193	2.96489	3.66079	2.35751	3.27376	0.916246	0.0165403	AC011476.3	---
ENSG00000218227	AC136632.1	---	6.02989	6.00584	5.89447	6.6097	6.82515	6.25907	6.63493	6.44525	7.25931	7.67909	6.41851	6.35489	6.83083	7.13955	6.80565	6.81784	6.32272	6.86121	0.53849	0.0165418	AC136632.1	---
ENSG00000198053	SIRPA	signal regulatory protein alpha	11.861	11.5004	11.4645	10.9088	11.0875	11.0217	11.4019	13.0035	10.8259	11.1881	11.8397	12.5927	12.2464	12.5555	11.3457	11.3034	11.3208	11.8779	0.557049	0.0165492	SIRPA	signal regulatory protein alpha
ENSG00000174564	IL20RB	interleukin 20 receptor subunit beta	6.93486	4.77895	3.48694	3.93735	5.08984	3.07639	5.83842	8.38562	6.7986	5.34848	5.8926	5.02235	5.491	4.90689	3.66337	8.83422	4.73468	6.03813	1.30345	0.0165836	IL20RB	interleukin 20 receptor subunit beta
ENSG00000167720	SRR	serine racemase	7.46692	7.39039	7.20631	7.42581	8.25321	7.85478	7.30163	7.19395	6.96118	6.94681	7.7198	7.14667	6.74415	7.33092	6.78034	5.91654	7.55701	6.97115	-0.585854	0.0166865	SRR	serine racemase
ENSG00000198774	RASSF9	Ras association domain family member 9	6.27717	7.25572	7.74496	8.29988	7.16129	6.74911	8.01296	5.4768	6.81178	6.63389	7.23711	6.06929	5.80114	4.85798	7.36943	7.306	7.3573	6.39593	-0.961364	0.0166933	RASSF9	Ras association domain family member 9
ENSG00000144848	ATG3	autophagy related 3	10.3685	10.5449	10.3624	10.4875	10.5983	10.4816	10.4378	11.0084	10.6297	11.1361	10.4737	10.9735	10.7109	10.888	10.5344	10.3645	10.4687	10.7466	0.277874	0.0167188	ATG3	autophagy related 3
ENSG00000177337	DLGAP1-AS1	DLGAP1 antisense RNA 1	5.63997	4.58518	5.25299	5.1297	5.26542	4.99906	6.11085	8.66449	4.48874	5.58689	4.95293	5.23838	6.4477	7.53916	5.38702	5.25823	5.28331	5.9515	0.668194	0.016723	DLGAP1-AS1	DLGAP1 antisense RNA 1
ENSG00000144746	ARL6IP5	ADP ribosylation factor like GTPase 6 interacting protein 5	11.6686	11.4057	11.3316	11.4893	10.9064	11.0749	10.6937	10.6369	10.9057	10.2258	11.0503	10.4913	10.2564	11.0821	11.154	11.1238	11.2243	10.7696	-0.45474	0.0167299	ARL6IP5	ADP ribosylation factor like GTPase 6 interacting protein 5
ENSG00000249962	AL157400.5	---	5.66334	1.10446	5.48001	3.17872	1.07167	5.38862	1.05737	0.945781	1.6055	1.03271	4.49307	2.86788	1.41108	3.16993	1.55829	1.73532	3.27774	2.09106	-1.18668	0.0167561	AL157400.5	---
ENSG00000198265	HELZ	helicase with zinc finger	10.5242	10.9516	11.2085	10.3107	10.5246	10.4652	10.3328	8.64793	10.2462	10.0376	10.4414	10.0289	9.391	9.49985	10.4883	10.6762	10.6168	9.93971	-0.677113	0.0167572	HELZ	helicase with zinc finger
ENSG00000213235	EEF1A1P16	eukaryotic translation elongation factor 1 alpha 1 pseudogene 16	3.89193	3.17812	4.98346	3.02857	2.10621	1.16296	2.41266	1.51221	1.01543	1.62842	1.72491	1.03561	3.55899	2.32193	6.70165	1.73532	2.96627	2.35938	-0.606889	0.0167691	EEF1A1P16	eukaryotic translation elongation factor 1 alpha 1 pseudogene 16
ENSG00000246067	RAB30-AS1	RAB30 antisense RNA 1 (head to head)	5.49118	5.48242	5.84872	5.72548	6.22545	5.79502	5.72505	6.97775	5.91282	6.52342	5.69274	5.85048	6.82027	7.06609	5.7419	6.09921	5.75619	6.2983	0.542111	0.0167793	RAB30-AS1	RAB30 antisense RNA 1 (head to head)
ENSG00000120314	WDR55	WD repeat domain 55	9.8205	9.60459	9.73048	9.57657	9.71342	9.68399	10.0491	10.4412	10.174	10.2093	9.57917	10.2737	10.136	10.4263	9.83943	9.57287	9.7398	10.0724	0.332638	0.0167831	WDR55	WD repeat domain 55
ENSG00000140470	ADAMTS17	ADAM metallopeptidase with thrombospondin type 1 motif 17	7.76037	7.35028	7.87616	7.18973	9.90963	7.82355	8.12894	10.3063	8.14952	9.12528	9.08228	9.69781	10.0729	9.25267	6.91433	8.97445	8.00552	9.06396	1.05843	0.0168057	ADAMTS17	ADAM metallopeptidase with thrombospondin type 1 motif 17
ENSG00000112081	SRSF3	serine and arginine rich splicing factor 3	10.7721	10.7331	10.5872	11.5688	11.3837	11.0414	10.9681	12.2983	11.1753	11.672	11.4536	11.3973	11.8082	12.3592	10.6766	10.9299	11.0078	11.5301	0.522291	0.0168318	SRSF3	serine and arginine rich splicing factor 3
ENSG00000162927	PUS10	pseudouridylate synthase 10	9.41505	9.06873	9.14084	8.17141	8.50587	9.16675	8.9765	8.6906	8.61933	7.61896	8.91549	8.04737	8.19908	8.02791	8.61454	8.84523	8.92074	8.39761	-0.523125	0.0168462	PUS10	pseudouridylate synthase 10
ENSG00000213222	AC093724.1	---	2.74437	2.75508	2.49613	2.45286	2.43495	3.27414	2.90435	4.5943	3.48736	2.63908	3.55575	4.15378	2.76719	3.58496	3.13425	3.78789	2.72313	3.52273	0.799602	0.0168751	AC093724.1	---
ENSG00000118922	KLF12	Kruppel like factor 12	10.5162	10.3361	10.1132	9.17562	9.74155	9.52565	9.60825	8.22965	9.26186	8.77536	9.85895	8.89358	8.92835	7.88264	9.38193	10.2339	9.85951	9.04958	-0.809939	0.016893	KLF12	Kruppel like factor 12
ENSG00000231683	AL033397.1	---	7.17332	7.30901	5.84872	4.01926	7.89422	7.22593	6.96959	6.35018	4.61439	6.40377	6.05149	5.23838	0	0	1.96996	5.02008	6.63429	3.96092	-2.67338	0.0169346	AL033397.1	---
ENSG00000108953	YWHAE	tyrosine 3-monooxygenase/tryptophan 5-monooxygenase activation protein epsilon	12.0006	12.1701	11.947	11.7061	12.0828	12.1166	11.9275	12.1383	12.1683	12.9714	12.2496	12.4389	12.1257	12.2871	12.1835	12.1883	11.993	12.3057	0.31271	0.0169522	YWHAE	tyrosine 3-monooxygenase/tryptophan 5-monooxygenase activation protein epsilon
ENSG00000181035	SLC25A42	solute carrier family 25 member 42	12.0479	10.9491	11.1566	9.84716	10.0024	10.6896	10.0997	8.57622	9.79055	9.96248	10.0799	9.77937	9.73655	8.49185	10.5874	11.1499	10.6847	9.79491	-0.889742	0.0169549	SLC25A42	solute carrier family 25 member 42
ENSG00000106591	MRPL32	mitochondrial ribosomal protein L32	10.4345	10.5515	10.8316	10.4232	10.3949	10.6434	10.6632	10.3158	10.6287	10.7599	10.6309	11.2194	11.1063	10.8478	11.3047	11.5436	10.5632	10.9286	0.36538	0.0169805	MRPL32	mitochondrial ribosomal protein L32
ENSG00000143355	LHX9	LIM homeobox 9	4.17815	5.28377	5.32158	3.65936	5.99563	4.68837	5.10916	3.89661	3.48736	4.58551	4.09923	3.06176	4.73986	3.80735	3.66337	5.02008	4.89086	4.04013	-0.850734	0.016989	LHX9	LIM homeobox 9
ENSG00000125651	GTF2F1	general transcription factor IIF subunit 1	9.40122	9.82	9.50758	9.88452	9.79442	9.71197	9.3815	10.4431	9.87928	10.3719	9.79673	10.215	9.88698	10.5048	9.54482	9.51433	9.64303	10.0174	0.374406	0.0170339	GTF2F1	general transcription factor IIF subunit 1
ENSG00000171552	BCL2L1	BCL2 like 1	10.7096	10.8063	10.8382	10.6973	10.6848	10.4576	10.843	11.8813	11.0349	11.1548	10.5445	11.6345	10.7002	11.6662	10.8356	10.6793	10.7195	11.1257	0.406156	0.0170359	BCL2L1	BCL2 like 1
ENSG00000134470	IL15RA	interleukin 15 receptor subunit alpha	7.58177	7.42942	7.74496	8.64448	8.14506	8.16615	8.70472	8.9148	9.26905	8.42206	8.01379	8.85157	9.27985	10.1319	7.83034	7.63669	8.05951	8.70556	0.64605	0.0170396	IL15RA	interleukin 15 receptor subunit alpha
ENSG00000132849	PATJ	PATJ, crumbs cell polarity complex component	10.5266	10.8201	10.8557	9.54753	10.0133	10.1498	10.2482	9.23835	9.41866	9.27892	10.4977	10.0533	9.73092	9.19476	9.96266	10.2711	10.3087	9.73848	-0.570264	0.0171248	PATJ	PATJ, crumbs cell polarity complex component
ENSG00000142089	IFITM3	interferon induced transmembrane protein 3	13.5628	13.3611	14.2359	13.3259	14.303	14.0262	14.3971	14.0348	14.0518	14.792	14.0006	14.8183	14.5499	14.7082	14.1971	14.6062	13.8874	14.4177	0.530247	0.0171427	IFITM3	interferon induced transmembrane protein 3
ENSG00000112699	GMDS	GDP-mannose 4,6-dehydratase	9.6786	8.84884	10.2304	8.54773	10.0133	9.84233	9.72896	10.4499	10.1496	10.4266	9.80791	10.588	10.1613	10.6502	9.6446	9.71561	9.55573	10.1771	0.621334	0.017166	GMDS	GDP-mannose 4,6-dehydratase
ENSG00000112715	VEGFA	vascular endothelial growth factor A	11.9754	12.2259	11.9071	11.2521	12.3029	12.1762	12.1793	12.1542	12.223	12.4176	12.4436	12.7996	13.2897	11.9697	12.0958	12.9107	12.0027	12.4782	0.475502	0.0172274	VEGFA	vascular endothelial growth factor A
ENSG00000250471	GMPSP1	guanine monophosphate synthase pseudogene 1	2.34259	2.75508	2.71591	3.17872	1.67975	2.57451	1.05737	4.14341	3.19724	3.22758	1.72491	3.38541	3.34007	4	4.13199	2.99794	2.32913	3.34984	1.02071	0.0172679	GMPSP1	guanine monophosphate synthase pseudogene 1
ENSG00000136108	CKAP2	cytoskeleton associated protein 2	7.52549	7.70066	8.15988	8.28753	8.18384	8.58925	7.10038	5.99963	8.0362	7.26395	7.59918	7.05851	6.28837	6.70044	8.1547	6.83266	7.93529	7.10374	-0.831551	0.0172885	CKAP2	cytoskeleton associated protein 2
ENSG00000211891	IGHE	immunoglobulin heavy constant epsilon	1.78378	2.15398	3.70802	8.33229	2.10621	2.84716	4.4997	2.23417	3.93556	2.0488	4.91668	6.1779	5.9634	3.70044	3.86941	4.67016	3.63302	4.1685	0.53548	0.0173077	IGHE	immunoglobulin heavy constant epsilon
ENSG00000179104	TMTC2	transmembrane and tetratricopeptide repeat containing 2	6.64904	5.78289	6.38582	6.74827	6.20405	6.32745	7.08897	6.9127	6.97296	6.81901	7.15391	7.47084	7.19991	6.37504	7.01539	6.80287	6.45521	6.96918	0.513969	0.0173243	TMTC2	transmembrane and tetratricopeptide repeat containing 2
ENSG00000163577	EIF5A2	eukaryotic translation initiation factor 5A2	6.60143	6.26513	6.98101	6.6097	8.03421	6.99317	7.73405	8.36144	7.14942	7.32168	7.21489	7.90296	7.90159	8.52748	7.99338	7.44749	7.03124	7.75781	0.72657	0.0173504	EIF5A2	eukaryotic translation initiation factor 5A2
ENSG00000136111	TBC1D4	TBC1 domain family member 4	9.62752	9.97478	10.3796	9.99872	9.6594	9.98851	10.0681	9.6561	9.53845	9.59795	9.65126	8.70682	8.93815	8.72451	9.82867	10.0871	9.95667	9.41433	-0.542333	0.0173524	TBC1D4	TBC1 domain family member 4
ENSG00000137878	GCOM1	GRINL1A complex locus 1	4.8425	6.96831	4.22021	7.34075	3.44848	6.78197	5.43177	4.35409	2.61058	1.62842	3.11858	2.37849	2.76719	6.58496	1.96996	5.5726	5.57628	3.44276	-2.13352	0.0173858	GCOM1	GRINL1A complex locus 1
ENSG00000188833	ENTPD8	ectonucleoside triphosphate diphosphohydrolase 8	7.39195	7.46742	7.25973	5.81993	7.12758	7.30719	6.57075	4.7009	5.64478	4.38346	7.00649	6.46187	5.3804	5.12928	6.20827	7.37848	6.99208	5.81044	-1.18164	0.017487	ENTPD8	ectonucleoside triphosphate diphosphohydrolase 8
ENSG00000142794	NBPF3	NBPF member 3	4.41688	6.69161	5.38705	6.49985	7.49669	6.79813	6.50358	4.53789	6.09633	6.01788	6.14846	4.87527	5.22905	6.2854	4.96108	4.6026	6.25626	5.41711	-0.839151	0.0175278	NBPF3	NBPF member 3
ENSG00000110435	PDHX	pyruvate dehydrogenase complex component X	10.09	10.2185	9.90686	9.67146	10.165	9.97791	9.47652	9.835	9.36156	9.62113	9.69071	9.9422	9.04625	9.66888	9.62696	9.38207	9.92945	9.57497	-0.354477	0.0175544	PDHX	pyruvate dehydrogenase complex component X
ENSG00000244067	GSTA2	glutathione S-transferase alpha 2	7.23701	10.5157	5.64968	9.43451	5.08984	9.20966	4.80882	4.93732	7.44837	7.47372	7.98782	3.52354	4.49645	0	6.06892	4.7347	7.42075	5.18565	-2.2351	0.017612	GSTA2	glutathione S-transferase alpha 2
ENSG00000184557	SOCS3	suppressor of cytokine signaling 3	8.63231	10.2337	10.9165	10.5431	11.6378	10.971	10.5356	10.8276	10.3322	10.9633	10.8145	12.1766	12.7769	13.3415	11.2429	9.69345	10.4957	11.3521	0.856394	0.0176283	SOCS3	suppressor of cytokine signaling 3
ENSG00000139433	GLTP	glycolipid transfer protein	9.13687	9.00233	9.18753	9.6459	9.48182	9.38567	9.75987	10.0929	9.66728	9.39552	9.538	9.93912	9.61512	10.1774	9.5467	9.6439	9.37143	9.73511	0.363677	0.0176384	GLTP	glycolipid transfer protein
ENSG00000203761	MSTO2P	misato family member 2, pseudogene	6.44839	7.07061	6.17956	7.49902	7.29889	6.87629	7.17783	7.54822	8.08586	8.96845	6.72138	7.71388	8.21124	8.61471	6.53009	5.88845	6.9358	7.58692	0.651124	0.0176468	MSTO2P	misato family member 2, pseudogene
ENSG00000247746	USP51	ubiquitin specific peptidase 51	5.43796	5.58968	5.2877	5.4872	5.94492	6.23554	5.19682	4.75138	5.11726	4.14844	5.64922	3.76551	4.26701	5	5.09025	5.53685	5.59712	4.81399	-0.783126	0.0176644	USP51	ubiquitin specific peptidase 51
ENSG00000100558	PLEK2	pleckstrin 2	4.62166	7.99542	3.80702	5.20164	6.9201	5.38862	4.35477	9.49507	4.19893	4.06074	8.57234	3.64959	9.87045	8.75489	4.60529	9.72755	5.46989	6.99276	1.52287	0.0177417	PLEK2	pleckstrin 2
ENSG00000169688	MT1B	metallothionein 1B	0	0	0	0	0	0	0	0	0	0	3.73298	2.86788	0	9.61471	4.60529	5.07096	0	2.87687	2.87687	0.0177462	MT1B	metallothionein 1B
ENSG00000128607	KLHDC10	kelch domain containing 10	11.1102	11.4715	11.1454	9.53714	10.8394	10.5922	10.5533	10.3864	9.96583	10.1131	10.1779	10.3051	9.59359	9.19722	10.2851	11.1246	10.7499	10.1277	-0.622239	0.0177493	KLHDC10	kelch domain containing 10
ENSG00000142065	ZFP14	ZFP14 zinc finger protein	7.67095	7.85913	7.33631	7.23329	7.18333	6.90641	7.40648	6.84457	7.00773	6.40377	7.18472	6.82462	6.37745	6	7.26384	7.42811	7.37084	6.81498	-0.555866	0.0178172	ZFP14	ZFP14 zinc finger protein
ENSG00000100226	GTPBP1	GTP binding protein 1	8.63527	8.5096	9.20579	9.44566	9.36614	8.88984	9.27727	10.6436	9.61937	9.79764	8.63504	9.60943	9.59823	10.5108	9.27502	8.63306	9.04708	9.59135	0.544266	0.0178267	GTPBP1	GTP binding protein 1
ENSG00000189056	RELN	reelin	8.42573	11.9658	12.2716	12.4136	11.2979	11.7449	11.261	9.76455	10.711	11.4277	11.7621	11.0562	9.60286	9.60548	10.6766	10.07	11.3401	10.5196	-0.820471	0.017854	RELN	reelin
ENSG00000160013	PTGIR	prostaglandin I2 (prostacyclin) receptor (IP)	5.85822	6.0813	6.38582	6.93923	7.7466	6.21161	7.89341	6.95639	7.20041	7.84578	7.20741	7.22976	8.8423	9.01681	7.57472	6.89046	6.73089	7.64045	0.909561	0.017856	PTGIR	prostaglandin I2 (prostacyclin) receptor (IP)
ENSG00000279605	AC067930.6	---	7.65355	7.5316	7.52991	7.52729	7.51419	7.21394	7.35976	7.69086	7.96721	7.62661	7.47381	7.61689	8.3967	7.59991	7.83649	8.23605	7.47575	7.82717	0.351422	0.017921	AC067930.6	---
ENSG00000172264	MACROD2	MACRO domain containing 2	6.26194	6.15301	7.54433	6.09012	5.75193	6.25907	6.6032	5.102	4.98391	5.10718	6.26838	4.45941	6.12647	5.04439	6.48381	6.12352	6.38051	5.52212	-0.858396	0.0179501	MACROD2	MACRO domain containing 2
ENSG00000147383	NSDHL	NAD(P) dependent steroid dehydrogenase-like	10.7222	9.99768	10.6452	8.75321	10.1013	13.1003	8.81619	10.416	9.70308	9.71926	9.81285	9.60166	10.022	10.2981	9.57088	10.3734	10.3051	9.94636	-0.358785	0.0179825	NSDHL	NAD(P) dependent steroid dehydrogenase-like
ENSG00000198517	MAFK	MAF bZIP transcription factor K	8.60842	8.10193	8.28108	8.90098	8.30941	6.49538	8.82654	10.6411	8.09667	8.37739	7.47381	8.90627	9.52376	11.1935	8.2126	8.10181	8.21768	8.94743	0.729755	0.0180062	MAFK	MAF bZIP transcription factor K
ENSG00000130150	MOSPD2	motile sperm domain containing 2	8.94519	9.17015	9.46652	9.68093	9.74526	9.91819	9.42979	9.34699	8.40564	8.83935	9.24278	9.29425	9.61817	8.54303	8.72808	8.98444	9.47943	9.0003	-0.47913	0.018025	MOSPD2	motile sperm domain containing 2
ENSG00000108506	INTS2	integrator complex subunit 2	8.58107	8.51868	8.12192	8.3679	8.69034	8.36361	8.40222	8.42503	8.39692	8.19376	8.30774	7.74246	8.21124	7.8392	7.74135	7.77354	8.43511	8.07014	-0.364968	0.0180357	INTS2	integrator complex subunit 2
ENSG00000156239	N6AMT1	N-6 adenine-specific DNA methyltransferase 1 (putative)	7.98104	8.70118	7.62796	7.66726	7.94671	8.11548	8.17823	7.17558	6.9493	7.0067	7.41655	7.52941	7.51988	5.85798	7.99888	8.24162	8.03112	7.29954	-0.731579	0.0180548	N6AMT1	N-6 adenine-specific DNA methyltransferase 1 (putative)
ENSG00000160867	FGFR4	fibroblast growth factor receptor 4	11.1239	10.5768	10.4627	9.15538	9.47737	10.7624	9.18916	8.75388	9.79221	9.70668	10.1703	9.31581	8.81333	8.33985	9.49513	10.2241	10.1068	9.40124	-0.705571	0.0180594	FGFR4	fibroblast growth factor receptor 4
ENSG00000116991	SIPA1L2	signal induced proliferation associated 1 like 2	8.85164	8.92251	8.82369	9.12101	9.67115	9.22766	10.0623	11.7591	9.14958	9.4089	9.13253	9.6191	10.3738	11.0182	9.04203	9.32032	9.23999	9.86928	0.629288	0.0181012	SIPA1L2	signal induced proliferation associated 1 like 2
ENSG00000130584	ZBTB46	zinc finger and BTB domain containing 46	8.88433	8.91909	8.49664	8.42912	7.16129	7.86248	7.33099	7.63817	7.19035	6.76453	8.0266	7.08106	6.71026	6.40939	7.48359	8.68298	8.15485	7.33188	-0.822966	0.0181444	ZBTB46	zinc finger and BTB domain containing 46
ENSG00000242485	MRPL20	mitochondrial ribosomal protein L20	9.61409	9.99931	9.87298	10.4156	10.4299	9.76636	10.0148	10.1208	10.7569	10.9843	9.9163	10.3453	10.3446	10.7228	10.0801	10.6025	10.0161	10.4304	0.414244	0.0181831	MRPL20	mitochondrial ribosomal protein L20
ENSG00000144827	ABHD10	abhydrolase domain containing 10	9.94253	9.57008	8.77255	9.95776	9.98843	10.1963	9.51966	7.95596	9.82019	8.63818	8.43172	9.48389	8.91602	8.19967	7.3176	9.98633	9.70676	8.74995	-0.956805	0.0182115	ABHD10	abhydrolase domain containing 10
ENSG00000184454	NCMAP	non-compact myelin associated protein	7.49975	7.45801	5.64968	5.86494	6.405	5.94765	5.69525	5.59209	6.13878	5.87093	6.85189	5.27796	4.82678	4.64386	5.09025	5.16763	6.36004	5.49557	-0.864465	0.0182269	NCMAP	non-compact myelin associated protein
ENSG00000166897	ELFN2	extracellular leucine rich repeat and fibronectin type III domain containing 2	5.99347	2.98205	2.23676	3.43896	2.10621	4.0967	2.41266	0	0	0	3.55575	0	1.80284	0	3.2858	2.77058	3.32383	1.26833	-2.0555	0.0182617	ELFN2	extracellular leucine rich repeat and fibronectin type III domain containing 2
ENSG00000274818	AC004825.2	---	5.26542	4.43984	4.94049	3.55337	4.21955	4.29186	4.42905	4.06574	4.78445	5.4895	4.91668	4.59094	5.3804	5.45943	5.9828	6.30449	4.44851	5.21938	0.770871	0.018386	AC004825.2	---
ENSG00000266973	AC092296.1	---	4.5229	4.77895	3.07497	0	0	3.27414	3.42361	0	2.34653	0	2.83759	0	0	0	0	0	2.72494	0.576014	-2.14892	0.0184419	AC092296.1	---
ENSG00000176890	TYMS	thymidylate synthetase	7.10668	7.62703	8.14102	7.49902	9.64756	9.46876	5.50228	8.31604	6.83778	7.76484	7.59346	6.81119	6.36298	5.55459	7.84262	5.83057	7.85605	6.99045	-0.865598	0.0184975	TYMS	thymidylate synthetase
ENSG00000270956	AC009948.4	---	2.74437	2.48561	2.49613	3.02857	3.5872	3.44802	2.90435	3.98365	3.83588	3.05677	4.03304	3.76551	3.91692	3.90689	3.96235	2.99794	2.95632	3.71766	0.761337	0.0185799	AC009948.4	---
ENSG00000182795	C1orf116	chromosome 1 open reading frame 116	6.73979	5.51907	4.70406	7.6736	5.59635	8.23897	5.50228	5.102	6.27822	4.64703	5.94753	4.52667	4.78397	5.2854	6.15019	6.62702	6.28202	5.48312	-0.7989	0.0185915	C1orf116	chromosome 1 open reading frame 116
ENSG00000272968	RBAK-RBAKDN	RBAK-RBAKDN readthrough	0	0	1.9203	0	0	0	2.41266	3.5987	2.02308	0	3.45824	2.37849	2.11061	3.80735	0.980041	2.50056	0.618994	2.31745	1.69846	0.0186289	RBAK-RBAKDN	RBAK-RBAKDN readthrough
ENSG00000149923	PPP4C	protein phosphatase 4 catalytic subunit	10.0484	9.71927	9.75858	9.78558	9.6594	9.86934	9.83864	10.1887	9.99645	10.2655	9.67723	10.1471	10.0607	10.3977	9.84402	10.0384	9.81132	10.0684	0.257109	0.0186389	PPP4C	protein phosphatase 4 catalytic subunit
ENSG00000166803	PCLAF	PCNA clamp associated factor	4.71409	4.7172	3.48694	4.9324	7.12758	6.87629	4.10576	0	3.72879	2.86299	5.92945	3.52354	3.08188	3.58496	4.20987	4.96734	5.13718	3.5432	-1.59398	0.0186644	PCLAF	PCNA clamp associated factor
ENSG00000134186	PRPF38B	pre-mRNA processing factor 38B	9.01725	10.6426	10.1108	9.57994	8.95664	10.2705	10.1054	8.97446	9.15476	9.22698	8.91549	9.76377	9.27213	9.49785	8.91408	9.98798	9.81188	9.30084	-0.51104	0.0186809	PRPF38B	pre-mRNA processing factor 38B
ENSG00000205867	KRTAP5-2	keratin associated protein 5-2	1.78378	0	0	0	0	0	0	3.07208	2.02308	2.0488	1.34316	0	0	3.32193	2.55154	1.73532	0.254826	1.78843	1.53361	0.018714	KRTAP5-2	keratin associated protein 5-2
ENSG00000161016	RPL8	ribosomal protein L8	13.5434	13.6937	13.2253	13.5211	13.8258	12.7416	13.1408	13.6507	14.1315	14.1268	13.2832	13.6662	13.8571	14.1407	13.5481	14.0365	13.3845	13.8268	0.442229	0.0188048	RPL8	ribosomal protein L8
ENSG00000125877	ITPA	inosine triphosphatase	8.09715	8.45863	8.39686	8.57845	9.04355	8.45305	8.64753	8.40546	9.06406	9.52609	8.39925	9.02151	9.20273	9.15228	8.78644	8.84888	8.52503	8.93408	0.409045	0.0188479	ITPA	inosine triphosphatase
ENSG00000234814	SVILP1	supervillin pseudogene 1	1.39443	2.48561	0	3.3147	2.10621	0	0	1.51221	1.6055	4.14844	4.09923	4.06607	3.55899	2	3.96235	2.50056	1.32871	3.05037	1.72166	0.0188515	SVILP1	supervillin pseudogene 1
ENSG00000169439	SDC2	syndecan 2	12.4801	13.2992	12.8834	11.0348	12.5073	12.3649	12.0714	10.636	11.0675	11.3055	12.6691	12.3872	10.6073	11.2842	12.3858	11.364	12.3773	11.523	-0.854358	0.0188536	SDC2	syndecan 2
ENSG00000214447	FAM187A	family with sequence similarity 187 member A	0	3.64406	3.07497	0	0	3.27414	0	0	0	0	0	0	0	0	0	0	1.4276	0	-1.4276	0.0188793	FAM187A	family with sequence similarity 187 member A
ENSG00000204528	PSORS1C3	psoriasis susceptibility 1 candidate 3 (non-protein coding)	5.93705	3.17812	4.35721	4.01926	2.43495	0	3.27039	0	3.34958	2.0488	0.822554	2.37849	3.45368	3.45943	1.55829	2.50056	3.31386	2.1746	-1.13926	0.0190068	PSORS1C3	psoriasis susceptibility 1 candidate 3 (non-protein coding)
ENSG00000173894	CBX2	chromobox 2	5.35427	3.77104	5.35469	6.55582	5.91888	6.11175	5.31907	5.102	5.75804	4.23111	4.28131	4.06607	3.34007	4	5.57534	4.45718	5.48365	4.53457	-0.949076	0.0190156	CBX2	chromobox 2
ENSG00000203965	EFCAB7	EF-hand calcium binding domain 7	7.64771	6.928	5.35469	6.9909	7.13891	6.74911	6.2195	6.61845	6.67425	6.21356	6.17939	6.19867	5.86414	6.39232	5.38702	5.30148	6.7184	6.09214	-0.626262	0.0190287	EFCAB7	EF-hand calcium binding domain 7
ENSG00000114956	DGUOK	deoxyguanosine kinase	9.12219	8.56761	8.95093	9.43824	8.66315	9.15112	9.08961	9.13043	9.56787	9.4089	8.67628	9.35335	9.67491	9.56605	9.31301	9.86002	8.99755	9.39454	0.396988	0.019057	DGUOK	deoxyguanosine kinase
ENSG00000260500	AC010336.2	---	4.04213	2.98205	3.48694	2.19535	1.67975	2.84716	3.09895	1.51221	2.02308	0	2.98492	0	1.80284	1.58496	1.55829	2.77058	2.90462	1.58187	-1.32274	0.0191414	AC010336.2	---
ENSG00000236281	NDUFB9P2	NADH:ubiquinone oxidoreductase subunit B9 pseudogene 2	3.72426	2.48561	3.36225	2.6713	3.12318	3.27414	2.08522	3.5987	4.27702	4.23111	2.98492	4.23647	3.21674	4.16993	3.86941	3.90469	2.96085	3.83211	0.871258	0.0191468	NDUFB9P2	NADH:ubiquinone oxidoreductase subunit B9 pseudogene 2
ENSG00000166794	PPIB	peptidylprolyl isomerase B	13.9549	14.0739	13.5993	13.8887	14.336	13.8908	14.2358	14.6771	14.4787	15.0967	13.1816	14.3895	14.7367	14.7194	14.0265	14.8379	13.9971	14.4605	0.463393	0.0191611	PPIB	peptidylprolyl isomerase B
ENSG00000152332	UHMK1	U2AF homology motif kinase 1	9.40296	9.90553	10.2515	10.7394	9.48626	10.0301	11.3048	11.8147	10.7914	10.7866	9.84455	11.8294	11.0185	11.4878	11.8333	8.86338	10.1601	10.9188	0.75876	0.0191618	UHMK1	U2AF homology motif kinase 1
ENSG00000178719	GRINA	glutamate ionotropic receptor NMDA type subunit associated protein 1	10.509	11.7249	11.2443	11.0193	10.6125	10.9276	11.5214	12.0287	10.5513	11.312	10.9173	12.4742	12.2248	12.3115	11.4666	11.601	11.0798	11.6541	0.574295	0.0191726	GRINA	glutamate ionotropic receptor NMDA type subunit associated protein 1
ENSG00000242110	AMACR	alpha-methylacyl-CoA racemase	9.83986	10.2059	9.41252	10.153	9.43665	9.40426	10.0208	8.22965	9.44004	9.61537	9.43124	8.49643	7.76519	7.74147	8.91699	10.1579	9.78186	8.86603	-0.915823	0.0191898	AMACR	alpha-methylacyl-CoA racemase
ENSG00000260027	HOXB7	homeobox B7	5.59206	3.99569	4.06883	4.9324	4.03792	4.68837	4.19363	1.91789	4.42156	2.63908	3.64709	4.23647	3.99406	3	4.28377	3.52141	4.50127	3.51793	-0.983345	0.0191972	HOXB7	homeobox B7
ENSG00000083838	ZNF446	zinc finger protein 446	6.19936	6.24339	6.75167	7.16295	6.78247	6.74911	7.22029	7.27384	6.9008	7.89097	7.04897	8.24506	8.54827	6.9542	7.10984	5.99768	6.72989	7.32996	0.600066	0.0192206	ZNF446	zinc finger protein 446
ENSG00000100665	SERPINA4	serpin family A member 4	13.1622	13.5046	11.9602	10.7796	11.2307	12.1017	10.6757	11.0149	11.515	11.5205	12.0505	11.643	10.2787	10.6284	11.4431	11.7357	11.9164	11.3144	-0.601945	0.0192218	SERPINA4	serpin family A member 4
ENSG00000096006	CRISP3	cysteine rich secretory protein 3	4.11174	4.2782	3.22575	4.70377	0	2.23802	5.43177	2.90374	9.56203	6.19308	7.91619	0	2.57969	4.70044	5.28275	7.37848	3.42704	5.16849	1.74145	0.0192548	CRISP3	cysteine rich secretory protein 3
ENSG00000169891	REPS2	RALBP1 associated Eps domain containing 2	9.48066	9.35381	8.9804	6.49985	8.98201	9.46876	8.0894	7.92331	7.41422	7.69374	7.99218	7.33671	7.86611	6.39232	9.34141	8.5094	8.69356	7.82993	-0.863623	0.0192552	REPS2	RALBP1 associated Eps domain containing 2
ENSG00000259479	SORD2P	sorbitol dehydrogenase 2, pseudogene	11.1726	11.0966	10.4936	10.9999	11.3396	10.9137	10.0564	8.38961	9.36827	10.8411	10.7387	10.54	9.86404	10.5098	10.5096	10.1055	10.8675	10.0963	-0.77121	0.019371	SORD2P	sorbitol dehydrogenase 2, pseudogene
ENSG00000155465	SLC7A7	solute carrier family 7 member 7	8.38062	8.72098	8.96171	9.39286	8.59078	8.35271	8.80228	7.68438	8.84761	7.59574	8.63225	8.63624	8.43179	7.83289	8.31748	7.94017	8.74313	8.21317	-0.529964	0.0194	SLC7A7	solute carrier family 7 member 7
ENSG00000176402	GJC3	gap junction protein gamma 3	3.6325	2.98205	4.59745	3.17872	3.93775	3.74326	4.42905	2.49343	6.81178	5.01686	4.76183	3.76551	3.55899	5.24793	4.7162	5.07096	3.78582	4.60483	0.819007	0.0194155	GJC3	gap junction protein gamma 3
ENSG00000120156	TEK	TEK receptor tyrosine kinase	8.84399	9.70741	9.78615	11.0761	8.81558	9.39101	8.86049	8.76313	9.77549	8.58023	9.47084	9.0389	8.14935	8.94251	8.98779	8.22486	9.49724	8.88146	-0.615782	0.0194506	TEK	TEK receptor tyrosine kinase
ENSG00000162585	FAAP20	Fanconi anemia core complex associated protein 20	7.87992	7.75544	7.39319	7.41071	8.23222	7.66522	8.14004	9.15407	8.23516	8.60757	8.21376	8.50062	8.0714	8.03342	7.77377	7.68649	7.78239	8.25292	0.470525	0.0194566	FAAP20	Fanconi anemia core complex associated protein 20
ENSG00000143627	PKLR	pyruvate kinase, liver and RBC	11.0191	11.592	7.98589	8.52688	8.18384	11.9373	8.96406	4.89303	9.86038	9.42216	9.79922	6.92776	7.19175	6.35755	9.67581	8.55032	9.74415	8.07533	-1.66882	0.0195069	PKLR	pyruvate kinase, liver and RBC
ENSG00000136270	TBRG4	transforming growth factor beta regulator 4	9.68575	9.1759	9.29164	9.00265	9.26383	8.86705	9.46993	10.5015	9.5948	9.94115	9.06582	10.0801	9.56385	10.0498	9.11722	9.30447	9.25096	9.69097	0.440008	0.019513	TBRG4	transforming growth factor beta regulator 4
ENSG00000186111	PIP5K1C	phosphatidylinositol-4-phosphate 5-kinase type 1 gamma	8.50549	7.90831	8.25501	9.11404	7.91413	8.49824	8.51737	8.04467	7.82497	7.53195	8.21002	8.40554	8.14513	7.3837	7.35236	8.21924	8.38751	7.90195	-0.485559	0.0195405	PIP5K1C	phosphatidylinositol-4-phosphate 5-kinase type 1 gamma
ENSG00000196136	SERPINA3	serpin family A member 3	18.0661	17.6796	17.9144	16.8625	17.7642	17.4395	17.8619	17.5517	18.6652	17.8473	17.5224	18.1752	18.3713	19.09	18.2104	18.3436	17.6555	18.1975	0.541989	0.0195717	SERPINA3	serpin family A member 3
ENSG00000283765	AC131160.1	---	6.02989	0	5.56734	5.74967	6.16026	5.47154	6.33992	6.23071	7.35243	6.47335	6.49426	7.09221	5.94408	7.67948	6.94881	5.60748	5.04552	6.64698	1.60146	0.0195895	AC131160.1	---
ENSG00000170959	DCDC1	doublecortin domain containing 1	6.71763	8.62757	6.16096	5.01458	6.24654	7.79968	5.99335	7.12861	4.48874	4.96948	6.75256	6.31739	5.16377	5.16993	2.55154	5.83057	6.65147	5.37473	-1.27674	0.0196114	DCDC1	doublecortin domain containing 1
ENSG00000107643	MAPK8	mitogen-activated protein kinase 8	9.01725	9.49388	9.74616	8.98492	9.42282	9.26301	9.39778	9.27116	9.6709	9.95642	9.27893	9.78625	9.73233	10.7465	10.0111	9.4267	9.33226	9.76447	0.432213	0.0196132	MAPK8	mitogen-activated protein kinase 8
ENSG00000235576	LINC01871	long intergenic non-protein coding RNA 1871	0	0	2.49613	3.3147	3.12318	0	1.66096	2.23417	3.72879	2.86299	3.55575	1.63225	4.13699	4.24793	3.66337	3.78789	1.51357	3.31668	1.80311	0.0196316	LINC01871	long intergenic non-protein coding RNA 1871
ENSG00000147854	UHRF2	ubiquitin like with PHD and ring finger domains 2	9.67716	9.59604	10.0925	9.52492	9.30211	9.77454	9.39778	9.36736	9.29977	8.66817	9.15215	9.45397	9.10177	9.34207	9.52971	9.56623	9.62358	9.27569	-0.347888	0.0196437	UHRF2	ubiquitin like with PHD and ring finger domains 2
ENSG00000185201	IFITM2	interferon induced transmembrane protein 2	12.2433	11.679	12.0937	11.78	12.5646	12.1017	12.9531	12.3391	11.86	12.9217	12.225	13.1745	13.1951	13.4243	12.4479	13.2622	12.2022	12.7611	0.558894	0.0197136	IFITM2	interferon induced transmembrane protein 2
ENSG00000254521	SIGLEC12	sialic acid binding Ig like lectin 12 (gene/pseudogene)	6.36532	6.28655	5.64968	8.00546	4.30245	5.76246	7.94496	3.80397	4.83696	0	4.33724	0	5.05995	7.05528	5.79341	2.77058	6.33098	3.73971	-2.59127	0.0197269	SIGLEC12	sialic acid binding Ig like lectin 12 (gene/pseudogene)
ENSG00000206190	ATP10A	ATPase phospholipid transporting 10A (putative)	5.03398	4.09613	5.25299	7.74154	4.30245	4.94205	5.56952	4.84734	5.8115	4.8698	7.06562	4.92598	5.61829	5.52356	6.83052	5.53685	5.27695	5.66994	0.392988	0.0197441	ATP10A	ATPase phospholipid transporting 10A (putative)
ENSG00000053372	MRTO4	MRT4 homolog, ribosome maturation factor	8.77593	8.77122	8.64118	9.84996	10.1027	9.30883	9.55741	10.0456	9.9614	10.7193	9.10662	10.2086	10.2436	10.8329	9.03936	9.27764	9.28675	9.93722	0.650474	0.0197621	MRTO4	MRT4 homolog, ribosome maturation factor
ENSG00000221916	C19orf73	chromosome 19 open reading frame 73	5.38271	5.32575	3.89967	2.86097	3.71375	4.75609	4.27644	4.14341	3.83588	2.37392	1.72491	1.63225	3.34007	3.70044	3.2858	4.45718	4.31648	3.16598	-1.1505	0.0197704	C19orf73	chromosome 19 open reading frame 73
ENSG00000166130	IKBIP	IKBKB interacting protein	8.46616	8.54557	9.5313	9.50017	9.04054	9.26881	9.18381	9.07452	9.75176	9.76333	8.64338	9.44095	9.8263	9.84549	9.74285	10.0368	9.07662	9.56949	0.492861	0.0198314	IKBIP	IKBKB interacting protein
ENSG00000109929	SC5D	sterol-C5-desaturase	12.0496	12.6035	12.8668	10.84	12.081	14.5398	11.4843	11.7907	11.3436	10.4266	11.8788	11.5501	10.959	11.6826	12.4686	12.8153	12.3521	11.6572	-0.694899	0.0198413	SC5D	sterol-C5-desaturase
ENSG00000235472	EIF4A1P7	eukaryotic translation initiation factor 4A1 pseudogene 7	2.34259	1.72262	2.23676	2.19535	2.43495	3.27414	2.67935	3.80397	3.93556	3.86753	2.83759	3.76551	2.57969	4.24793	3.13425	1.11421	2.41225	3.25403	0.841775	0.0198624	EIF4A1P7	eukaryotic translation initiation factor 4A1 pseudogene 7
ENSG00000175003	SLC22A1	solute carrier family 22 member 1	14.2323	14.7127	11.8942	12.1503	10.6437	13.9072	11.6994	11.6535	12.3353	12.3111	12.4286	12.4958	9.364	13.0324	12.6077	11.3512	12.7485	11.9533	-0.795239	0.0198719	SLC22A1	solute carrier family 22 member 1
ENSG00000173402	DAG1	dystroglycan 1	8.50872	10.6714	8.92911	10.4992	8.92755	9.03323	8.79879	9.28193	8.30672	8.80602	9.12063	7.58569	5.29151	5.88264	8.25914	4.29544	9.33828	7.42553	-1.91275	0.0198813	DAG1	dystroglycan 1
ENSG00000103037	SETD6	SET domain containing 6	7.40587	7.6684	7.50801	7.17193	7.59862	7.28444	6.83945	7.42145	8.1074	8.49497	8.28303	7.59356	7.49355	7.93664	7.30878	7.51335	7.35382	7.79475	0.44093	0.0200228	SETD6	SET domain containing 6
ENSG00000170921	TANC2	tetratricopeptide repeat, ankyrin repeat and coiled-coil containing 2	7.59398	7.00753	8.7227	7.69245	7.41521	7.70003	7.33099	7.84991	6.86332	6.88432	7.47381	6.46187	6.83083	7.31288	7.2999	6.59261	7.63756	7.06327	-0.574284	0.02005	TANC2	tetratricopeptide repeat, ankyrin repeat and coiled-coil containing 2
ENSG00000130052	STARD8	StAR related lipid transfer domain containing 8	9.19616	8.94288	8.74159	9.72432	8.65528	8.93072	8.59606	8.48593	9.00505	8.23441	8.9132	8.7913	8.11522	8.77479	7.70819	8.02648	8.96957	8.45051	-0.519068	0.0200862	STARD8	StAR related lipid transfer domain containing 8
ENSG00000138615	CILP	cartilage intermediate layer protein	8.00868	7.30901	6.10369	7.52729	6.09199	6.76564	6.28097	6.13888	5.83751	6.83231	7.1461	4.65247	6.1435	5.24793	6.24573	6.14742	6.86961	6.04354	-0.826071	0.0200915	CILP	cartilage intermediate layer protein
ENSG00000205269	TMEM170B	transmembrane protein 170B	9.53869	9.35127	9.7446	8.18921	9.37813	9.74776	9.06653	8.39755	8.30206	8.76499	8.83766	8.8184	8.77559	8.39232	9.3349	9.45092	9.28803	8.78604	-0.501985	0.0201159	TMEM170B	transmembrane protein 170B
ENSG00000179743	FLJ37453	uncharacterized LOC729614	6.5522	5.36654	6.0642	5.57108	5.66061	4.75609	4.96679	4.7009	5.48943	4.8698	5.35628	3.97267	4.49645	4	3.96235	5.73915	5.5625	4.73189	-0.830609	0.0201163	FLJ37453	uncharacterized LOC729614
ENSG00000198963	RORB	RAR related orphan receptor B	4.5229	3.77104	3.22575	6.3176	5.49424	4.75609	3.42361	1.91789	4.83696	3.86753	3.45824	3.23264	3.91692	3	2.96489	4.53172	4.5016	3.5252	-0.976405	0.0201517	RORB	RAR related orphan receptor B
ENSG00000171222	SCAND1	SCAN domain containing 1	8.86933	8.83801	8.47422	8.9488	8.8811	8.29696	8.19961	8.9718	8.84441	9.18871	8.59832	8.74262	9.03488	9.7211	9.05263	9.25582	8.64401	9.04559	0.401584	0.0201528	SCAND1	SCAN domain containing 1
ENSG00000158483	FAM86C1	family with sequence similarity 86 member C1	6.13394	6.3891	5.98183	6.4564	6.16026	6.861	6.50358	7.22107	7.24966	7.68643	6.98913	7.77048	6.12647	7.24793	6.04786	5.80074	6.35516	6.90442	0.549263	0.0201948	FAM86C1	family with sequence similarity 86 member C1
ENSG00000166927	MS4A7	membrane spanning 4-domains A7	9.61109	10.0782	10.5984	11.181	10.5556	10.4345	10.2404	8.81746	9.95844	8.83605	9.97586	10.8008	9.81969	8.54303	10.1826	9.36433	10.3856	9.5887	-0.796909	0.0202013	MS4A7	membrane spanning 4-domains A7
ENSG00000129195	PIMREG	PICALM interacting mitotic regulator	2.34259	0	3.22575	3.02857	5.66061	5.88852	0	0	0	0	3.64709	0	1.80284	0	0	2.16809	2.87801	0.846446	-2.03156	0.0202122	PIMREG	PICALM interacting mitotic regulator
ENSG00000223956	LINC01767	long intergenic non-protein coding RNA 1767	5.85822	5.19596	3.48694	5.20164	5.9705	5.3453	5.39517	4.89303	6.7853	6.0861	5.73499	5.35401	5.77951	8.16993	5.17036	6.48417	5.20768	6.05082	0.843144	0.0202146	LINC01767	long intergenic non-protein coding RNA 1767
ENSG00000181704	YIPF6	Yip1 domain family member 6	9.03975	9.39136	9.42036	8.16692	8.89453	9.15426	9.74177	9.09176	9.89948	9.18612	8.73731	11.0661	8.86815	9.44915	10.2772	10.979	9.11556	9.72826	0.612692	0.0202236	YIPF6	Yip1 domain family member 6
ENSG00000138413	IDH1	isocitrate dehydrogenase (NADP(+)) 1, cytosolic	13.8142	13.8491	13.1835	11.808	12.9833	14.0822	12.4114	12.8141	12.9112	10.5605	13.1614	11.61	12.3322	11.9823	12.3411	13.189	13.1617	12.3224	-0.839227	0.0202371	IDH1	isocitrate dehydrogenase (NADP(+)) 1, cytosolic
ENSG00000170917	NUDT6	nudix hydrolase 6	7.89973	7.64372	7.7134	7.13566	7.81878	7.95904	8.18896	5.64646	7.53832	7.61896	7.41655	7.22976	6.50153	6.94251	7.36092	7.65348	7.76561	7.10094	-0.664669	0.0202433	NUDT6	nudix hydrolase 6
ENSG00000139209	SLC38A4	solute carrier family 38 member 4	15.3067	15.3851	14.8496	12.7755	13.9869	13.5332	13.8074	10.8761	12.6898	13.3199	14.1237	13.7491	13.113	12.3644	14.2259	14.2977	14.2349	13.1955	-1.03943	0.0202672	SLC38A4	solute carrier family 38 member 4
ENSG00000274026	FAM27E3	family with sequence similarity 27 member E3	3.72426	2.15398	3.80702	3.3147	0	1.16296	1.05737	4.84734	3.83588	4.14844	2.83759	4.23647	3.08188	2.32193	4.42109	4.9126	2.17433	3.84925	1.67492	0.0202731	FAM27E3	family with sequence similarity 27 member E3
ENSG00000161682	FAM171A2	family with sequence similarity 171 member A2	3.42936	2.98205	2.71591	1.88167	4.30245	3.27414	3.42361	0	0	0	3.24091	0	2.36413	0	1.96996	2.77058	3.14417	1.14951	-1.99466	0.0202997	FAM171A2	family with sequence similarity 171 member A2
ENSG00000178573	MAF	MAF bZIP transcription factor	11.2653	11.3786	11.2926	11.8386	10.5651	11.0036	10.3639	10.2349	10.2643	9.29101	10.8789	10.3359	9.8355	10.0661	10.9598	11.5254	11.1011	10.3769	-0.724199	0.020327	MAF	MAF bZIP transcription factor
ENSG00000243650	RN7SL834P	RNA, 7SL, cytoplasmic 834, pseudogene	0	1.10446	0	0.922201	1.67975	1.7984	3.09895	1.91789	3.48736	3.05677	2.48831	1.03561	2.9331	3.32193	2.77297	3.1943	1.22911	2.6898	1.4607	0.0203637	RN7SL834P	RNA, 7SL, cytoplasmic 834, pseudogene
ENSG00000124383	MPHOSPH10	M-phase phosphoprotein 10	10.0856	9.9431	9.86151	9.60005	9.92116	9.91078	9.7919	10.5406	9.80874	10.4	9.58207	9.97116	10.3547	10.8541	10.1298	10.353	9.87345	10.2216	0.348121	0.0203892	MPHOSPH10	M-phase phosphoprotein 10
ENSG00000283498	MIR1244-2	microRNA 1244-2	7.41279	7.85197	7.22434	8.58519	8.04628	7.55547	7.80551	8.47471	8.08043	8.5362	7.28766	8.09801	8.808	9.00282	8.00981	8.76252	7.78308	8.34001	0.556936	0.0204112	MIR1244-2	microRNA 1244-2
ENSG00000136897	MRPL50	mitochondrial ribosomal protein L50	9.96151	9.55912	9.90964	9.89812	9.80867	9.76636	9.9342	10.5839	9.79719	9.94728	9.64158	10.2737	10.3345	10.5038	10.0801	10.1177	9.83395	10.1422	0.308231	0.0204222	MRPL50	mitochondrial ribosomal protein L50
ENSG00000184897	H1FX	H1 histone family member X	9.4691	8.56761	9.54212	10.0987	9.8069	8.74736	9.51327	10.2438	10.4046	10.0476	10.1712	9.49023	9.69383	9.63662	9.99739	9.76858	9.39215	9.93932	0.547176	0.0204589	H1FX	H1 histone family member X
ENSG00000158023	WDR66	WD repeat domain 66	6.32192	5.84194	6.17956	7.26721	5.56311	6.25907	6.2195	5.9786	4.02879	4.8698	6.13274	4.97497	5.88455	5.12928	5.79341	6.12352	6.23604	5.43507	-0.800972	0.0204809	WDR66	WD repeat domain 66
ENSG00000181163	NPM1	nucleophosmin	12.4873	12.7352	12.5888	13.3206	13.3709	12.9795	12.7366	13.7874	13.4974	14.1183	12.5454	13.1717	13.3673	13.922	12.8541	13.1709	12.8884	13.3816	0.493181	0.0204969	NPM1	nucleophosmin
ENSG00000240224	UGT1A5	UDP glucuronosyltransferase family 1 member A5	9.14934	13.0625	9.25922	8.29988	9.1141	10.67	9.79716	7.83243	10.2727	10.6144	10.6169	9.75152	10.5341	9.34651	11.3376	13.035	9.90746	10.3712	0.463771	0.020498	UGT1A5	UDP glucuronosyltransferase family 1 member A5
ENSG00000232827	LINC01189	long intergenic non-protein coding RNA 1189	0	1.72262	2.23676	0	2.43495	0	1.66096	0	0	0	0	0	0	0	0	0	1.15076	0	-1.15076	0.0205458	LINC01189	long intergenic non-protein coding RNA 1189
ENSG00000245958	AC093752.1	---	7.23701	7.83753	7.40114	7.31665	7.55702	7.22593	7.42475	6.89034	7.51434	6.84549	7.17708	6.74212	6.68722	6.9542	7.18889	7.37848	7.42858	7.04202	-0.38656	0.0205607	AC093752.1	---
ENSG00000143110	C1orf162	chromosome 1 open reading frame 162	9.5164	9.14399	8.98305	10.8742	8.44787	9.64879	8.87385	8.67434	9.17275	7.26395	8.75024	8.53778	9.69671	8.09276	9.07362	8.53681	9.35544	8.64433	-0.711115	0.0205709	C1orf162	chromosome 1 open reading frame 162
ENSG00000260565	ERVK13-1	endogenous retrovirus group K13 member 1	7.02784	7.11916	7.48576	7.32473	8.19473	7.40537	7.74863	7.45229	8.14433	8.3499	8.11324	7.56983	8.49619	7.19967	8.09437	8.42391	7.47232	7.98264	0.510321	0.0205879	ERVK13-1	endogenous retrovirus group K13 member 1
ENSG00000274849	AC023043.4	---	2.74437	0	2.90658	2.19535	2.70251	1.16296	2.67935	3.70498	4.61439	3.05677	0	4.23647	3.08188	3.80735	3.54816	3.1943	2.05588	3.24937	1.19349	0.0206266	AC023043.4	---
ENSG00000111554	MDM1	Mdm1 nuclear protein	7.64183	7.54054	7.18806	7.71105	7.46104	7.83142	7.17783	7.19395	7.35243	7.07544	7.09835	7.09221	7.18354	7.25739	7.33509	7.37848	7.5074	7.21854	-0.288856	0.0206408	MDM1	Mdm1 nuclear protein
ENSG00000131871	SELENOS	selenoprotein S	10.4689	10.6976	10.3461	10.6377	10.2984	10.622	10.4545	11.4674	10.7154	11.5374	9.72124	10.8881	11.1188	11.6733	10.5391	10.7067	10.5036	10.9297	0.426103	0.0206462	SELENOS	selenoprotein S
ENSG00000258102	MAP1LC3B2	microtubule associated protein 1 light chain 3 beta 2	5.5425	4.94975	4.65174	3.65936	5.52909	5.15772	5.99335	7.86145	4.93657	5.45551	5.2727	6.15682	6.46135	6.79442	5.2088	5.02008	5.06907	5.90752	0.838449	0.0206569	MAP1LC3B2	microtubule associated protein 1 light chain 3 beta 2
ENSG00000229019	AL161457.1	---	0	0	1.51434	2.19535	2.10621	0	2.08522	0	0	0	0	0	0	0	0	0	1.12873	0	-1.12873	0.020666	AL161457.1	---
ENSG00000179271	GADD45GIP1	GADD45G interacting protein 1	9.51319	9.03116	8.95093	8.99508	9.09388	8.70943	8.88709	9.54243	9.20307	9.69398	8.80828	9.40118	9.38385	9.47168	9.09687	9.94431	9.02582	9.39396	0.368137	0.0207111	GADD45GIP1	GADD45G interacting protein 1
ENSG00000273306	AC018690.1	---	2.55742	2.75508	4.06883	2.19535	1.67975	1.7984	3.09895	3.89661	4.72996	4.76271	2.02649	3.23264	3.21674	3.58496	2.77297	5.07096	2.5934	3.69934	1.10594	0.0207116	AC018690.1	---
ENSG00000115365	LANCL1	LanC like 1	10.0113	9.89686	10.1794	10.0544	10.3456	10.3161	9.99048	9.75375	9.7449	9.76333	10.3535	9.49023	9.42969	9.52356	10.1184	9.19691	10.1135	9.70825	-0.405206	0.0207257	LANCL1	LanC like 1
ENSG00000179941	BBS10	Bardet-Biedl syndrome 10	9.51479	9.18162	8.32768	8.21116	8.85388	9.03664	8.88048	8.99294	8.15987	8.01281	8.90628	8.64004	7.89657	8.18982	8.08407	8.38423	8.85804	8.36296	-0.495076	0.0207413	BBS10	Bardet-Biedl syndrome 10
ENSG00000235151	AC131097.4	---	1.78378	0	1.51434	1.88167	0	2.57451	0	0	0	0	0	0	0	0	0	0	1.10776	0	-1.10776	0.020746	AC131097.4	---
ENSG00000264443	AL445686.2	---	1.78378	2.98205	2.49613	2.45286	0	0	2.08522	1.91789	0	0	0	0	0	0	0	0	1.68572	0.213099	-1.47262	0.0207675	AL445686.2	---
ENSG00000270681	AC095055.1	---	0	0	2.23676	3.02857	4.03792	3.27414	2.41266	2.49343	5.23933	3.96737	2.6735	2.37849	2.76719	6.20945	4.7162	3.1943	2.14144	3.73769	1.59626	0.0208151	AC095055.1	---
ENSG00000215712	TMEM242	transmembrane protein 242	9.35352	9.43995	8.81182	8.75918	9.08219	8.88607	8.75613	8.57622	8.67808	8.87192	8.85452	8.44954	8.15356	8.49586	8.76402	9.05879	9.0127	8.65583	-0.356861	0.0208383	TMEM242	transmembrane protein 242
ENSG00000276547	PCDHGB5	protocadherin gamma subfamily B, 5	7.25251	7.23384	5.72757	6.98072	8.19473	7.68273	7.68183	8.04972	7.85711	8.54834	8.51288	8.18906	7.98899	7.19967	7.46782	8.14401	7.25056	7.99529	0.744727	0.0208401	PCDHGB5	protocadherin gamma subfamily B, 5
ENSG00000166004	CEP295	centrosomal protein 295	7.9576	8.05903	8.35248	8.36006	8.12811	8.09601	7.86024	7.55535	7.70297	8.04745	7.96581	7.22976	7.74859	7.40939	7.96559	8.11399	8.11622	7.74877	-0.367452	0.0209351	CEP295	centrosomal protein 295
ENSG00000146147	MLIP	muscular LMNA interacting protein	10.1039	9.29162	9.80124	6.03211	9.24037	9.06027	9.00714	4.7009	7.45678	5.70729	6.37909	8.05878	6.47487	3.58496	9.42747	8.76252	8.93381	6.72807	-2.20574	0.0209652	MLIP	muscular LMNA interacting protein
ENSG00000183682	BMP8A	bone morphogenetic protein 8a	2.09008	1.72262	0.947361	1.88167	0	2.23802	0	3.5987	2.02308	2.0488	2.02649	2.86788	3.91692	2	1.96996	2.16809	1.26854	2.51332	1.24479	0.0209767	BMP8A	bone morphogenetic protein 8a
ENSG00000125703	ATG4C	autophagy related 4C cysteine peptidase	9.42876	9.53024	8.98833	9.05214	8.67097	8.8164	8.98576	8.61423	8.76871	8.59201	9.11863	8.7567	8.56417	7.97154	8.49907	9.06194	9.06751	8.66078	-0.406735	0.0210278	ATG4C	autophagy related 4C cysteine peptidase
ENSG00000213977	TAX1BP3	Tax1 binding protein 3	9.2259	7.93568	8.87879	9.69346	9.66333	9.09664	9.22609	10.2569	9.94803	9.58622	9.06582	10.1283	9.67345	10.2021	9.20304	9.19691	9.10284	9.69565	0.592805	0.0210554	TAX1BP3	Tax1 binding protein 3
ENSG00000112294	ALDH5A1	aldehyde dehydrogenase 5 family member A1	11.9548	12.227	12.4882	10.9007	11.282	12.1442	11.4401	10.4499	10.8055	10.9618	11.7486	11.2786	10.3261	10.599	11.7412	11.9811	11.7767	11.0991	-0.677643	0.0210872	ALDH5A1	aldehyde dehydrogenase 5 family member A1
ENSG00000214264	KCTD9P4	potassium channel tetramerization domain containing 9 pseudogene 4	5.203	3.88773	3.22575	2.19535	3.83009	0	3.42361	0	1.6055	2.37392	4.03304	1.63225	1.41108	1.58496	1.55829	0	3.10936	1.57767	-1.53169	0.0210945	KCTD9P4	potassium channel tetramerization domain containing 9 pseudogene 4
ENSG00000110079	MS4A4A	membrane spanning 4-domains A4A	8.69885	9.3614	9.4184	10.4493	8.76532	9.26881	9.10102	8.25174	9.53249	6.76453	9.63183	8.66638	7.79244	8.27146	8.58561	7.29534	9.29472	8.3102	-0.98452	0.0211607	MS4A4A	membrane spanning 4-domains A4A
ENSG00000228661	AC090587.1	---	0	0	0	0	0	0	0	4.21711	2.02308	2.0488	2.6735	0	0	0	1.96996	0	0	1.43694	1.43694	0.0212698	AC090587.1	---
ENSG00000228903	RASA4CP	RAS p21 protein activator 4C, pseudogene	3.89193	5.05333	4.42112	6.09012	4.83525	6.861	4.63139	4.7009	4.19893	4.3093	5.35628	4.76816	4.44242	3.32193	4.48514	2.99794	5.11202	4.28678	-0.825244	0.021295	RASA4CP	RAS p21 protein activator 4C, pseudogene
ENSG00000005810	MYCBP2	MYC binding protein 2, E3 ubiquitin protein ligase	10.8262	10.8891	11.3532	10.8926	10.6839	11.0036	11.0126	10.1505	10.9547	10.9618	10.8015	10.8084	10.2603	10	10.5874	10.4134	10.9516	10.5487	-0.402937	0.0213241	MYCBP2	MYC binding protein 2, E3 ubiquitin protein ligase
ENSG00000182752	PAPPA	pappalysin 1	3.19287	2.98205	5.48001	7.30853	8.22692	5.69504	7.1117	8.86695	6.18001	7.08658	8.04771	8.78445	9.174	10.5651	6.54519	4.20722	5.71387	7.71747	2.0036	0.0213304	PAPPA	pappalysin 1
ENSG00000186642	PDE2A	phosphodiesterase 2A	9.50674	9.16437	9.45893	10.9609	9.30211	9.67964	8.73066	9.10638	9.99789	9.01002	9.52752	8.40107	8.23528	8.25267	8.06847	8.8157	9.54334	8.82389	-0.719451	0.0213317	PDE2A	phosphodiesterase 2A
ENSG00000136689	IL1RN	interleukin 1 receptor antagonist	9.42192	8.61069	9.9454	7.31665	8.83311	8.38516	10.2736	13.8165	8.55025	9.44615	8.59259	10.5195	11.146	13.371	9.69794	8.24162	8.9695	10.3757	1.40621	0.0213579	IL1RN	interleukin 1 receptor antagonist
ENSG00000123689	G0S2	G0/G1 switch 2	9.39774	10.6734	8.72586	10.9583	10.7647	11.476	12.2315	12.1507	12.0083	12.9031	9.96924	12.1398	12.7482	12.973	9.89206	10.5156	10.6039	11.7	1.09607	0.0213675	G0S2	G0/G1 switch 2
ENSG00000174032	SLC25A30	solute carrier family 25 member 30	12.188	11.1647	11.5144	10.0398	10.226	11.2612	10.6833	10.8589	9.89639	9.07581	10.6462	9.95599	10.8301	9.30378	10.8584	11.02	11.011	10.2717	-0.739301	0.0213851	SLC25A30	solute carrier family 25 member 30
ENSG00000109205	ODAM	odontogenic, ameloblast asssociated	0	0	0	5.23631	0	0	0	2.49343	0	0	3.11858	2.05309	2.11061	0	0	4.96734	0.748044	1.63812	0.890074	0.0214538	ODAM	odontogenic, ameloblast asssociated
ENSG00000166391	MOGAT2	monoacylglycerol O-acyltransferase 2	12.7558	12.5839	10.7185	9.84996	8.91772	11.3841	9.46111	7.06017	11.0461	9.48246	10.7413	9.00981	6.62794	7.37504	9.2078	11.0273	10.8102	9.0642	-1.74595	0.0214591	MOGAT2	monoacylglycerol O-acyltransferase 2
ENSG00000215595	C20orf202	chromosome 20 open reading frame 202	1.78378	3.17812	0	0	0	0	0	3.70498	2.02308	3.51837	3.24091	3.38541	2.36413	3.32193	0	2.77058	0.708843	2.70327	1.99442	0.0214682	C20orf202	chromosome 20 open reading frame 202
ENSG00000148719	DNAJB12	DnaJ heat shock protein family (Hsp40) member B12	10.0639	9.5503	9.68889	9.40052	9.8069	10.0129	9.63792	10.1819	10.0475	10.066	9.99446	10.0099	10.327	9.65642	9.87423	10.1357	9.73733	10.0326	0.295233	0.0214924	DNAJB12	DnaJ heat shock protein family (Hsp40) member B12
ENSG00000090339	ICAM1	intercellular adhesion molecule 1	9.47076	10.7829	11.8896	10.7219	11.4385	11.5801	12.189	11.8621	11.4559	12.2327	11.3877	13.4239	12.8699	13.4407	11.325	10.0416	11.1533	12.0044	0.851128	0.0214985	ICAM1	intercellular adhesion molecule 1
ENSG00000008282	SYPL1	synaptophysin like 1	10.821	10.3977	10.3264	10.7529	10.7729	10.4032	10.6203	11.5238	10.5444	11.1015	10.6791	10.926	10.7711	11.346	10.5373	10.9647	10.5849	10.9326	0.347742	0.0215494	SYPL1	synaptophysin like 1
ENSG00000243243	AC073130.2	---	2.90985	3.64406	2.49613	1.48027	2.70251	0	2.67935	0	1.01543	0	2.83759	0	0.871594	0	0	0	2.27317	0.524957	-1.74821	0.0216032	AC073130.2	---
ENSG00000124784	RIOK1	RIO kinase 1	8.55632	8.2235	8.40479	8.81758	8.64341	8.90857	8.75252	9.7553	8.81198	9.28377	8.48839	9.10366	9.54954	9.57175	8.62879	8.23047	8.61524	9.04707	0.431833	0.0216386	RIOK1	RIO kinase 1
ENSG00000154889	MPPE1	metallophosphoesterase 1	9.24152	9.3048	9.1503	8.82329	9.09968	8.90111	8.58392	8.42891	8.7101	8.56835	9.14237	9.03313	8.57363	8.51964	8.53734	8.61603	9.01495	8.68106	-0.33389	0.0216471	MPPE1	metallophosphoesterase 1
ENSG00000119943	PYROXD2	pyridine nucleotide-disulphide oxidoreductase domain 2	9.68717	8.99909	7.90997	8.61514	6.51338	8.46321	7.69695	8.14249	7.99636	6.10814	7.03213	6.13543	7.93621	5.64386	8.50681	7.85563	8.26927	7.26189	-1.00738	0.0216484	PYROXD2	pyridine nucleotide-disulphide oxidoreductase domain 2
ENSG00000128918	ALDH1A2	aldehyde dehydrogenase 1 family member A2	7.10668	7.25572	7.50063	8.20242	7.25793	7.00713	8.24144	8.71625	8.24491	7.94095	7.99218	8.15226	7.88142	8.10852	7.96559	7.59384	7.51028	8.06621	0.555934	0.0216674	ALDH1A2	aldehyde dehydrogenase 1 family member A2
ENSG00000080031	PTPRH	protein tyrosine phosphatase, receptor type H	8.34853	7.70862	7.85896	8.94094	9.29959	7.74239	9.45668	10.8589	8.08043	8.85572	8.64892	9.30147	9.9645	10.8234	8.31307	8.34342	8.47939	9.24331	0.763925	0.0216682	PTPRH	protein tyrosine phosphatase, receptor type H
ENSG00000162551	ALPL	alkaline phosphatase, liver/bone/kidney	10.3352	10.0202	10.8658	10.213	11.7291	11.5411	11.8506	11.8965	11.2583	11.9219	12.0712	12.4964	11.7377	11.9189	10.7502	11.3492	10.9364	11.7111	0.774715	0.0216996	ALPL	alkaline phosphatase, liver/bone/kidney
ENSG00000133275	CSNK1G2	casein kinase 1 gamma 2	8.84909	8.71704	9.4513	9.53191	9.35889	9.09337	9.18381	9.5244	9.48803	9.65146	9.3554	9.58597	9.50081	9.6865	9.48929	9.17382	9.16935	9.49508	0.325729	0.0218467	CSNK1G2	casein kinase 1 gamma 2
ENSG00000111206	FOXM1	forkhead box M1	3.72426	3.88773	5.18098	5.67582	7.51419	8.12191	3.80463	3.48395	5.11726	3.86753	6.4442	4.45941	5.22905	4	5.2088	4.79647	5.41565	4.73408	-0.681572	0.0218562	FOXM1	forkhead box M1
ENSG00000171443	ZNF524	zinc finger protein 524	6.82516	6.26513	6.927	6.25135	6.61418	5.76246	7.36923	6.44525	7.19035	6.73651	7.32962	7.74951	7.6802	6.62936	7.13001	7.81143	6.5735	7.18914	0.615637	0.0218836	ZNF524	zinc finger protein 524
ENSG00000131725	WDR44	WD repeat domain 44	9.73346	9.41343	9.1944	9.26857	9.49068	9.30318	9.0282	9.05455	9.10478	9.15734	9.17151	9.1417	8.6139	9.32418	9.08658	8.55032	9.34742	9.02276	-0.324655	0.0219223	WDR44	WD repeat domain 44
ENSG00000180263	FGD6	FYVE, RhoGEF and PH domain containing 6	8.72963	8.33561	8.77561	8.4986	8.73206	8.76391	8.62795	7.68438	8.63795	8.20914	8.33889	7.63986	7.6802	8.00562	8.407	8.8379	8.63762	8.1601	-0.477519	0.0219471	FGD6	FYVE, RhoGEF and PH domain containing 6
ENSG00000102763	VWA8	von Willebrand factor A domain containing 8	11.0817	10.7253	10.8864	9.84996	10.545	10.9834	10.4162	10.4306	10.2143	9.96097	10.8292	10.4157	9.71107	9.93369	10.1766	10.2993	10.6411	10.2191	-0.422094	0.0219601	VWA8	von Willebrand factor A domain containing 8
ENSG00000142684	ZNF593	zinc finger protein 593	7.95286	8.13773	7.23327	8.20242	7.68613	7.18965	7.86024	9.11364	7.77202	8.37739	7.1694	8.50896	8.63212	9.13699	7.4914	8.48146	7.75176	8.29815	0.546396	0.0219666	ZNF593	zinc finger protein 593
ENSG00000112773	FAM46A	family with sequence similarity 46 member A	10.3151	9.45658	9.59849	8.04021	9.46617	9.85396	10.0253	10.5743	10.8227	9.53018	9.00454	9.35566	11.4359	11.0063	10.0955	10.3923	9.53655	10.2464	0.709827	0.0219765	FAM46A	family with sequence similarity 46 member A
ENSG00000198765	SYCP1	synaptonemal complex protein 1	0	0	0	2.6713	4.30245	0	2.08522	0	0	0	0	0	0	0	0	0	1.29414	0	-1.29414	0.0220266	SYCP1	synaptonemal complex protein 1
ENSG00000130948	HSD17B3	hydroxysteroid 17-beta dehydrogenase 3	4.62166	6.19891	4.65174	6.74827	5.66061	4.88269	5.15366	4.35409	5.45625	3.51837	4.33724	4.38886	4.69435	5.2854	5.38702	4.37858	5.41679	4.64446	-0.772328	0.0220327	HSD17B3	hydroxysteroid 17-beta dehydrogenase 3
ENSG00000157557	ETS2	ETS proto-oncogene 2, transcription factor	12.2585	12.9519	13.2992	12.8755	12.9414	12.6995	12.4211	13.3164	13.1929	13.4604	12.4579	13.7385	13.0754	15.0438	12.9754	12.7441	12.7782	13.3338	0.555676	0.0220337	ETS2	ETS proto-oncogene 2, transcription factor
ENSG00000119509	INVS	inversin	9.33726	9.93973	9.86438	8.46245	8.6031	9.41215	8.97959	9.17503	8.11804	8.42206	8.77576	9.19178	8.90357	8.14466	8.94002	8.91303	9.22838	8.73155	-0.49683	0.022071	INVS	inversin
ENSG00000261934	PCDHGA9	protocadherin gamma subfamily A, 9	5.17074	4.2782	4.85051	5.74967	4.71934	3.07639	5.35762	4.47919	5.70252	6.99492	6.1946	6.31739	5.86414	6.02237	5.71544	3.52141	4.74321	5.64578	0.902565	0.0221024	PCDHGA9	protocadherin gamma subfamily A, 9
ENSG00000177675	CD163L1	CD163 molecule like 1	5.26542	5.19596	9.10966	7.93862	7.97225	8.03598	7.48693	6.33371	6.43973	5.5227	8.28659	6.95243	6.60353	6.32193	5.48425	5.25823	7.2864	6.3559	-0.930505	0.022169	CD163L1	CD163 molecule like 1
ENSG00000158089	GALNT14	polypeptide N-acetylgalactosaminyltransferase 14	4.62166	4.19003	5.50971	7.24185	6.83911	6.99317	5.31907	4.47919	4.93657	5.67812	5.98302	5.6539	5.35137	4.75489	5.17036	4.20722	5.81637	5.13496	-0.681411	0.0222207	GALNT14	polypeptide N-acetylgalactosaminyltransferase 14
ENSG00000241224	C3orf85	chromosome 3 open reading frame 85	8.8893	8.95964	6.0236	5.59798	5.59635	8.53726	5.35762	3.48395	7.20041	5.84491	6.10079	2.64384	4.59879	5.64386	7.37789	7.50413	6.99454	5.59984	-1.3947	0.022223	C3orf85	chromosome 3 open reading frame 85
ENSG00000164294	GPX8	glutathione peroxidase 8 (putative)	6.10008	5.84194	6.40175	7.4031	7.54856	7.39479	6.853	5.82206	6.48978	5.94627	7.24444	5.06822	5.40885	5.83289	5.86737	6.52123	6.79189	6.02235	-0.769541	0.0222875	GPX8	glutathione peroxidase 8 (putative)
ENSG00000226124	FTCDNL1	formiminotransferase cyclodeaminase N-terminal like	7.283	7.39039	6.63524	5.57108	6.97167	6.71548	6.1553	5.82206	4.48874	5.45551	6.4442	6.39144	5.86414	6.93074	5.89121	5.97114	6.67459	5.91769	-0.756907	0.0223573	FTCDNL1	formiminotransferase cyclodeaminase N-terminal like
ENSG00000105355	PLIN3	perilipin 3	8.7213	8.74825	9.2766	9.41004	9.71342	9.3312	9.8905	10.9021	9.84764	9.55847	9.5864	10.2452	9.33834	10.5784	9.38613	9.13549	9.29876	9.84202	0.543263	0.0223702	PLIN3	perilipin 3
ENSG00000124788	ATXN1	ataxin 1	10.0539	9.88813	9.37871	9.39861	9.39712	9.20057	9.34599	8.66449	8.8855	8.82611	9.3037	8.64383	9.17193	9.62388	9.21961	9.5326	9.5233	9.09685	-0.426445	0.0223713	ATXN1	ataxin 1
ENSG00000222009	BTBD19	BTB domain containing 19	3.96898	4.7172	5.06574	5.20164	4.71934	2.84716	4.69299	5.61953	5.11726	5.64835	6.81298	4.45941	5.26062	6.50779	4.42109	4.01274	4.45901	5.31775	0.858742	0.0223779	BTBD19	BTB domain containing 19
ENSG00000197362	ZNF786	zinc finger protein 786	6.71763	7.59305	7.28571	7.14482	6.81107	7.39479	6.89292	6.49054	6.63029	6.52342	6.76281	7.19916	6.3036	6.35755	6.63263	7.18418	7.12	6.67602	-0.443977	0.0223974	ZNF786	zinc finger protein 786
ENSG00000141522	ARHGDIA	Rho GDP dissociation inhibitor alpha	10.6064	10.3245	10.911	11.4137	11.0172	10.7228	10.7928	11.4412	11.088	11.8567	10.9669	11.2201	11.2489	12.2589	10.703	10.8888	10.8269	11.2969	0.470015	0.0224223	ARHGDIA	Rho GDP dissociation inhibitor alpha
ENSG00000250295	RDH10-AS1	RDH10 antisense RNA 1	2.34259	2.48561	2.71591	0	0	0	3.42361	3.07208	3.02689	1.62842	2.2758	2.64384	4.49645	4.45943	3.54816	4.29544	1.56682	3.27183	1.70502	0.0224643	RDH10-AS1	RDH10 antisense RNA 1
ENSG00000089157	RPLP0	ribosomal protein lateral stalk subunit P0	13.4766	13.8838	13.2248	13.1793	13.8446	13.5412	13.3078	13.4491	14.7259	14.4865	13.375	13.5673	14.1002	14.236	13.8169	13.7305	13.494	13.9431	0.449048	0.0225117	RPLP0	ribosomal protein lateral stalk subunit P0
ENSG00000089041	P2RX7	purinergic receptor P2X 7	7.84457	6.84383	6.98101	7.90669	7.02146	6.66352	8.53008	6.63198	7.21039	7.0067	6.88041	6.7279	6.01983	6.55459	7.44385	7.17258	7.39874	6.8498	-0.548934	0.0225454	P2RX7	purinergic receptor P2X 7
ENSG00000198270	TMEM116	transmembrane protein 116	8.76246	8.68515	7.62117	7.04079	7.5904	7.81564	8.02499	8.20269	6.98464	6.99492	7.60489	7.41867	6.55343	6.44294	7.57472	7.7581	7.93437	7.28167	-0.652703	0.0225591	TMEM116	transmembrane protein 116
ENSG00000163993	S100P	S100 calcium binding protein P	6.13394	0	4.59745	4.5469	8.30941	4.54257	6.28097	9.6158	5.42229	7.97133	5.12166	5.52824	10.4373	10.4115	5.71544	7.01261	4.91589	7.47069	2.5548	0.0225857	S100P	S100 calcium binding protein P
ENSG00000125520	SLC2A4RG	SLC2A4 regulator	10.0428	10.5757	9.29803	8.17141	8.99764	9.42781	8.0779	7.38992	8.86035	8.64197	9.49716	8.12539	7.00867	6.82018	8.70473	9.37955	9.22733	8.26977	-0.957561	0.0226115	SLC2A4RG	SLC2A4 regulator
ENSG00000160201	U2AF1	U2 small nuclear RNA auxiliary factor 1	9.58685	9.49847	9.49093	10.0125	9.83676	9.76636	9.49393	9.61239	10.1353	10.5575	9.54396	9.8168	10.1974	10.5382	9.93426	9.87083	9.6694	10.023	0.353555	0.0226317	U2AF1	U2 small nuclear RNA auxiliary factor 1
ENSG00000183604	SMG1P5	SMG1P5, nonsense mediated mRNA decay associated PI3K related kinase pseudogene 5	7.39893	7.62703	7.57275	8.42161	7.78314	8.02229	7.57136	8.49337	8.14952	8.07569	7.70393	8.09801	8.21528	8.73132	8.18876	8.08334	7.77102	8.19325	0.422231	0.0227241	SMG1P5	SMG1P5, nonsense mediated mRNA decay associated PI3K related kinase pseudogene 5
ENSG00000226479	TMEM185B	transmembrane protein 185B	6.19936	6.62593	7.19721	7.81218	8.24275	7.47736	8.37429	9.05455	8.07497	8.6495	7.82622	8.5255	8.31261	9.21189	7.41947	6.97303	7.41844	8.22753	0.809086	0.0227352	TMEM185B	transmembrane protein 185B
ENSG00000069424	KCNAB2	potassium voltage-gated channel subfamily A regulatory beta subunit 2	9.49376	6.84383	7.92658	9.55956	8.40161	8.50318	7.94496	6.82112	7.83146	6.12985	7.67167	9.18138	6.98051	6.67243	8.2126	6.77245	8.38192	7.36372	-1.01821	0.0227406	KCNAB2	potassium voltage-gated channel subfamily A regulatory beta subunit 2
ENSG00000271643	AC112220.4	---	3.72426	3.50482	4.29034	4.43196	4.5259	4.68837	4.80882	5.28449	4.67333	5.55515	4.54148	4.82271	5.26062	4.85798	4.60529	4.67016	4.28207	4.91902	0.636957	0.0227427	AC112220.4	---
ENSG00000196290	NIF3L1	NGG1 interacting factor 3 like 1	8.59025	8.60218	8.37686	8.8032	8.79783	8.73483	8.98576	9.03685	9.03906	9.04186	9.11863	9.07586	9.05977	8.82972	8.60376	8.82684	8.6987	8.95915	0.260451	0.0227462	NIF3L1	NGG1 interacting factor 3 like 1
ENSG00000280444	AC073592.10	---	0	0	0	0	0	0	0	0	3.34958	3.64438	1.72491	2.37849	0	0	1.55829	0	0	1.40618	1.40618	0.0227976	AC073592.10	---
ENSG00000231721	LINC-PINT	long intergenic non-protein coding RNA, p53 induced transcript	6.63728	5.62373	5.25299	6.3337	5.56311	5.25456	6.82576	7.58349	5.96093	5.31096	6.41851	5.85048	7.14177	7.60733	7.0262	7.33751	5.92731	6.69302	0.765713	0.0228122	LINC-PINT	long intergenic non-protein coding RNA, p53 induced transcript
ENSG00000256039	LINC02446	long intergenic non-protein coding RNA 2446	1.78378	2.48561	2.49613	5.88692	3.44848	0	4.63139	2.71312	2.61058	0	2.83759	2.86788	0	2.32193	2.77297	0	2.96176	1.79156	-1.1702	0.0228264	LINC02446	long intergenic non-protein coding RNA 2446
ENSG00000270165	AC010530.1	---	0.859513	0	0	1.48027	1.07167	1.7984	1.05737	2.23417	2.02308	0	2.6735	1.03561	2.9331	2.32193	2.28986	2.50056	0.895317	2.00131	1.10599	0.0229474	AC010530.1	---
ENSG00000134882	UBAC2	UBA domain containing 2	10.8926	9.6466	9.75394	10.1382	9.08805	9.66209	9.47213	9.33462	9.08592	9.55246	9.25735	10.0885	9.09303	9.21189	9.50482	8.47203	9.80765	9.28896	-0.518693	0.0229723	UBAC2	UBA domain containing 2
ENSG00000259905	PWRN1	Prader-Willi region non-protein coding RNA 1	0	2.15398	0	0	0	0	2.08522	1.51221	3.02689	2.37392	1.34316	2.64384	1.41108	2	1.96996	2.99794	0.6056	2.14211	1.53651	0.0229879	PWRN1	Prader-Willi region non-protein coding RNA 1
ENSG00000134779	TPGS2	tubulin polyglutamylase complex subunit 2	9.51479	9.16148	9.03248	9.48403	9.32707	9.38567	8.98268	8.62442	9.13916	9.26672	8.63225	9.1417	9.19662	8.3443	9.03936	8.27455	9.26974	8.85101	-0.418735	0.0230201	TPGS2	tubulin polyglutamylase complex subunit 2
ENSG00000070669	ASNS	asparagine synthetase (glutamine-hydrolyzing)	7.66518	6.76973	7.17885	7.86852	8.84007	7.04823	8.5385	9.70975	6.6886	7.43936	7.24444	10.2638	9.28178	9.40727	6.74153	9.25582	7.7013	8.44804	0.746747	0.023025	ASNS	asparagine synthetase (glutamine-hydrolyzing)
ENSG00000205683	DPF3	double PHD fingers 3	6.67227	7.09509	6.21605	6.01224	6.44204	6.45519	5.96866	5.5356	6.55392	5.76393	6.25392	5.19769	5.6896	5.75489	5.81849	6.21684	6.40879	5.86499	-0.543806	0.0230753	DPF3	double PHD fingers 3
ENSG00000159479	MED8	mediator complex subunit 8	10.09	10.125	9.666	9.95256	9.96953	9.88265	10.1195	10.5024	10.1261	10.832	9.62903	10.3889	10.4112	10.5962	10.0015	10.2	9.97217	10.2986	0.326412	0.0231405	MED8	mediator complex subunit 8
ENSG00000172716	SLFN11	schlafen family member 11	8.07554	8.50504	8.583	9.8625	9.09096	8.56585	8.79176	7.59735	8.56977	7.52378	8.81075	8.25004	8.81599	8.18982	8.44776	7.71075	8.78209	8.21289	-0.569203	0.0231458	SLFN11	schlafen family member 11
ENSG00000231167	YBX1P2	Y-box binding protein 1 pseudogene 2	4.80095	5.44482	4.80333	5.20164	4.30245	5.05391	5.23873	5.38385	6.09633	6.06371	5.15316	5.11268	5.40885	5.88264	5.57534	5.07096	4.97798	5.5275	0.549528	0.02315	YBX1P2	Y-box binding protein 1 pseudogene 2
ENSG00000082641	NFE2L1	nuclear factor, erythroid 2 like 1	13.1861	12.6829	12.6072	12.1529	12.3846	12.6547	12.2654	11.3783	11.3975	12.0101	12.5395	12.2792	12.3958	12.2333	12.1344	12.4203	12.562	12.0876	-0.474356	0.0231649	NFE2L1	nuclear factor, erythroid 2 like 1
ENSG00000153443	UBALD1	UBA like domain containing 1	7.95286	7.98236	7.02281	7.93334	7.7091	6.28222	7.47821	8.67434	7.97308	8.14662	7.37039	7.90927	8.30506	8.54689	7.87286	8.00047	7.48013	8.08878	0.608646	0.0231716	UBALD1	UBA like domain containing 1
ENSG00000244349	AL662791.4	---	0	0	0	0	0	0	0	2.71312	0	1.03271	1.34316	1.63225	1.41108	2	0	0	0	1.12581	1.12581	0.0231894	AL662791.4	---
ENSG00000123999	INHA	inhibin alpha subunit	0	0	0	0	1.67975	0	0	1.51221	2.02308	0	2.02649	2.37849	1.80284	2.58496	0	1.73532	0.239965	1.5626	1.32263	0.0232674	INHA	inhibin alpha subunit
ENSG00000213533	TMEM110	transmembrane protein 110	10.5988	9.61732	10.0502	9.04238	9.7341	9.98675	9.88556	9.87398	9.30444	9.29582	9.48483	9.41899	9.4572	9.02791	9.00973	9.92023	9.84502	9.42146	-0.423561	0.0232806	TMEM110	transmembrane protein 110
ENSG00000168040	FADD	Fas associated via death domain	8.55943	8.7521	8.33599	8.64448	8.48827	8.72641	8.49593	9.62598	9.10478	9.02458	8.68439	8.87111	8.87071	9.31288	8.5929	8.23605	8.5718	8.92482	0.353019	0.0232824	FADD	Fas associated via death domain
ENSG00000122778	KIAA1549	KIAA1549	6.85592	6.81464	7.06343	6.30132	6.88017	6.62781	7.51279	6.92374	6.47329	5.55515	5.83549	6.52902	5.56871	6.97728	6.36967	5.77027	6.86515	6.22251	-0.642639	0.0233089	KIAA1549	KIAA1549
ENSG00000196678	ERI2	ERI1 exoribonuclease family member 2	8.39814	9.0438	8.51506	8.1073	8.8191	8.67922	8.65529	8.4558	8.14952	7.9348	8.72688	8.21478	8.13239	7.84549	8.11476	8.50015	8.60256	8.23051	-0.37205	0.023335	ERI2	ERI1 exoribonuclease family member 2
ENSG00000158186	MRAS	muscle RAS oncogene homolog	7.76578	7.88744	6.0642	7.59564	8.00356	5.82687	6.57075	5.9786	5.67394	6.47335	6.49426	5.19769	5.56871	7.56224	7.28199	4.8557	7.10203	6.12072	-0.981315	0.0233479	MRAS	muscle RAS oncogene homolog
ENSG00000223842	AL360093.1	---	0	0	0	0	0	0	0	0	0	0	1.34316	3.23264	2.57969	2	2.77297	0	0	1.32538	1.32538	0.0233577	AL360093.1	---
ENSG00000103876	FAH	fumarylacetoacetate hydrolase	12.6222	12.0806	11.372	10.6377	11.5519	12.0583	11.4372	10.3602	11.2118	11.6604	11.7707	11.0332	10.4647	10.6909	11.374	11.4135	11.68	11.1088	-0.571204	0.0233757	FAH	fumarylacetoacetate hydrolase
ENSG00000236499	LINC00896	long intergenic non-protein coding RNA 896	4.24164	2.15398	0.947361	4.43196	3.29498	3.07639	4.91603	2.90374	2.02308	3.38029	2.02649	2.05309	1.41108	1.58496	2.28986	3.66079	3.29462	2.37038	-0.924243	0.023488	LINC00896	long intergenic non-protein coding RNA 896
ENSG00000105136	ZNF419	zinc finger protein 419	5.49118	6.70758	6.04404	6.52811	6.0685	6.05909	6.76969	9.30324	6.8506	6.45627	7.69326	7.74246	5.16377	7.49985	4.60529	5.88845	6.23831	6.80035	0.56204	0.023501	ZNF419	zinc finger protein 419
ENSG00000272338	AC067838.1	---	5.23455	4.36128	2.71591	4.24032	3.29498	4.46374	3.5621	2.23417	2.8337	0	2.48831	2.64384	3.21674	4.08746	3.13425	4.11325	3.98184	2.75019	-1.23165	0.0235149	AC067838.1	---
ENSG00000175193	PARL	presenilin associated rhomboid like	8.50226	8.5277	8.85874	9.38322	9.09096	9.07028	8.72698	9.07452	9.47152	9.93808	8.71901	9.09814	9.01651	9.9901	9.31742	9.17963	8.88002	9.31166	0.431637	0.0235295	PARL	presenilin associated rhomboid like
ENSG00000173545	ZNF622	zinc finger protein 622	9.27414	9.78281	9.20124	9.1599	9.11983	9.29181	9.2287	9.74599	9.48392	9.90541	9.35878	9.96814	9.55114	10.7582	9.32181	9.25307	9.29406	9.70517	0.411103	0.0235373	ZNF622	zinc finger protein 622
ENSG00000187479	C11orf96	chromosome 11 open reading frame 96	7.86991	8.41067	10.998	9.30373	8.57419	9.39101	10.4321	10.4092	9.01363	8.7156	9.3418	11.1697	12.7763	12.6089	10.1571	9.85821	9.28281	10.45	1.16723	0.0235464	C11orf96	chromosome 11 open reading frame 96
ENSG00000265205	AC010761.3	---	2.09008	0	0	1.48027	0	0	2.67935	3.22282	4.02879	3.22758	0	3.64959	3.45368	3.58496	1.96996	0	0.892814	2.57082	1.67801	0.0235475	AC010761.3	---
ENSG00000272745	AC004948.1	---	2.74437	0	0	2.86097	0	1.7984	2.08522	0	0	0	0	1.03561	0.871594	0	0	0	1.35557	0.211912	-1.14365	0.023561	AC004948.1	---
ENSG00000254093	PINX1	PIN2/TERF1 interacting telomerase inhibitor 1	7.89481	7.89443	7.818	7.92805	7.83975	8.04954	7.6038	8.93406	8.0695	8.4654	7.34334	8.38756	8.40378	9.45738	7.98233	7.69462	7.8612	8.30422	0.443022	0.0236117	PINX1	PIN2/TERF1 interacting telomerase inhibitor 1
ENSG00000130713	EXOSC2	exosome component 2	8.5343	9.04694	8.31932	8.67639	8.9662	8.88984	8.88709	9.15407	9.03626	9.33139	8.93601	9.46687	8.94059	9.73809	8.58561	8.94407	8.76001	9.12588	0.365873	0.0236502	EXOSC2	exosome component 2
ENSG00000133703	KRAS	KRAS proto-oncogene, GTPase	10.0272	9.99768	10.2504	10.1811	10.4125	10.1228	10.4983	11.0569	9.73802	10.8053	10.462	10.972	11.1607	11.3745	10.41	9.7176	10.2128	10.633	0.420147	0.0236647	KRAS	KRAS proto-oncogene, GTPase
ENSG00000064989	CALCRL	calcitonin receptor like receptor	8.40855	9.43995	9.35437	10.881	9.69052	9.92373	9.65737	8.4558	9.20056	9.18353	9.66908	9.00981	8.76462	9.01681	9.82867	8.47203	9.62221	9.06677	-0.555446	0.0236979	CALCRL	calcitonin receptor like receptor
ENSG00000172985	SH3RF3	SH3 domain containing ring finger 3	5.87834	5.28377	6.35343	7.63514	6.88017	6.21161	7.01854	8.12823	6.7986	6.81901	7.30178	7.01232	7.63876	9.09011	6.6467	6.14742	6.46586	7.28699	0.821135	0.0237345	SH3RF3	SH3 domain containing ring finger 3
ENSG00000213443	AC007068.1	---	4.80095	5.62373	1.9203	2.6713	5.66061	5.51128	2.67935	5.89124	6.47329	6.75059	5.48563	5.76949	5.75755	6.02237	3.2858	6.28307	4.12393	5.74656	1.62263	0.0237417	AC007068.1	---
ENSG00000107798	LIPA	lipase A, lysosomal acid type	12.0954	12.3811	13.3396	12.7755	12.4678	12.8759	12.3834	10.7498	12.4682	11.9223	12.5848	12.689	11.4806	11.4615	12.4679	11.2947	12.6169	11.9021	-0.714873	0.0238048	LIPA	lipase A, lysosomal acid type
ENSG00000258033	AC063947.2	---	0	0	0	0	0	0	0	2.71312	0	0	2.02649	2.05309	0	2.32193	0	2.77058	0	1.32058	1.32058	0.0238242	AC063947.2	---
ENSG00000064655	EYA2	EYA transcriptional coactivator and phosphatase 2	6.29224	6.22132	3.89967	6.0517	2.70251	6.55363	4.19363	5.31838	4.42156	4.06074	5.21417	3.76551	5.26062	4.16993	3.54816	3.78789	5.13067	4.39411	-0.736566	0.0238628	EYA2	EYA transcriptional coactivator and phosphatase 2
ENSG00000122507	BBS9	Bardet-Biedl syndrome 9	7.73853	7.74774	7.86472	7.58222	7.53147	7.65639	7.34064	6.71064	7.1285	6.63389	7.74068	6.90265	7.39031	6.33985	7.66736	7.41832	7.63739	7.10358	-0.53381	0.0238825	BBS9	Bardet-Biedl syndrome 9
ENSG00000125166	GOT2	glutamic-oxaloacetic transaminase 2	14.0817	13.9259	12.9286	12.124	12.1819	13.49	12.4887	12.8764	11.8292	12.0703	12.6238	12.3903	11.8785	12.6411	12.7881	13.1649	13.0315	12.4736	-0.55791	0.0238897	GOT2	glutamic-oxaloacetic transaminase 2
ENSG00000276409	CCL14	C-C motif chemokine ligand 14	9.52599	9.76766	10.3594	11.9152	8.8191	10.521	8.36958	8.08951	9.39915	9.30777	10.1362	9.38087	8.91849	9.72622	8.13985	10.0669	9.89684	9.24055	-0.656298	0.0239214	CCL14	C-C motif chemokine ligand 14
ENSG00000105875	WDR91	WD repeat domain 91	8.7045	9.38889	9.31706	8.50572	8.38744	8.5081	8.96094	8.26917	8.42721	7.9348	8.52196	8.91884	8.37883	8.22882	8.70473	8.51859	8.82466	8.43366	-0.391001	0.0239457	WDR91	WD repeat domain 91
ENSG00000121064	SCPEP1	serine carboxypeptidase 1	10.0682	9.17876	9.70182	10.2442	9.55338	9.98675	9.35792	9.04699	9.11279	8.86222	10.1722	9.22253	9.05302	9.11114	9.49902	9.21115	9.72729	9.25456	-0.472732	0.0239461	SCPEP1	serine carboxypeptidase 1
ENSG00000135828	RNASEL	ribonuclease L	8.16422	7.25572	7.53714	8.19803	8.02203	8.23304	8.17284	7.46747	7.94943	6.40377	8.32167	7.5538	6.68722	6.74147	7.07904	6.94603	7.94043	7.23888	-0.701555	0.0239484	RNASEL	ribonuclease L
ENSG00000095970	TREM2	triggering receptor expressed on myeloid cells 2	3.19287	5.36654	4.85051	6.2682	6.46021	5.25456	3.42361	4.06574	5.31532	3.86753	4.84133	3.87281	3.74903	3.32193	5.00543	2.77058	4.97378	4.08997	-0.883819	0.0240058	TREM2	triggering receptor expressed on myeloid cells 2
ENSG00000116106	EPHA4	EPH receptor A4	7.21345	6.50325	6.4485	8.12591	5.91888	7.42631	6.69638	6.04081	6.82483	5.61795	6.63477	5.56069	6.25741	6.37504	7.00451	6.3464	6.90467	6.29582	-0.608847	0.0240073	EPHA4	EPH receptor A4
ENSG00000110107	PRPF19	pre-mRNA processing factor 19	10.4976	10.8715	10.8571	10.6181	11.1511	10.8819	10.7858	11.4027	11.0356	11.8676	11.0084	11.4648	10.9602	11.865	10.6402	10.5862	10.809	11.2034	0.394371	0.0240342	PRPF19	pre-mRNA processing factor 19
ENSG00000197905	TEAD4	TEA domain transcription factor 4	5.61621	5.95325	5.96048	7.47744	7.45199	6.87629	7.00646	8.25174	6.93733	6.84549	7.02363	8.36936	8.27059	8.53528	6.45211	6.04934	6.6203	7.41498	0.79468	0.0241648	TEAD4	TEA domain transcription factor 4
ENSG00000105223	PLD3	phospholipase D family member 3	10.4944	10.9774	11.0311	11.2652	10.4775	10.5283	10.8025	10.2238	10.6417	10.4255	10.8492	10.5328	10.4156	10.2264	10.7172	10.1025	10.7966	10.4594	-0.337207	0.0241653	PLD3	phospholipase D family member 3
ENSG00000175164	ABO	ABO, alpha 1-3-N-acetylgalactosaminyltransferase and alpha 1-3-galactosyltransferase	2.09008	0	3.36225	6.30132	2.92812	0	1.66096	2.90374	3.83588	4.52126	2.98492	3.64959	3.34007	2	3.96235	2.99794	2.33468	3.35508	1.02041	0.0241678	ABO	ABO, alpha 1-3-N-acetylgalactosaminyltransferase and alpha 1-3-galactosyltransferase
ENSG00000183323	CCDC125	coiled-coil domain containing 125	9.53552	9.47535	8.42051	8.29988	9.33694	9.40953	8.86718	8.63455	8.1854	8.80602	9.34691	9.0186	8.06694	8	7.96559	8.34859	9.04927	8.48584	-0.563429	0.0241822	CCDC125	coiled-coil domain containing 125
ENSG00000255445	AP003072.2	---	0	0	1.51434	0	0	0	0	1.51221	0	0	0	2.64384	3.08188	2	2.28986	3.3671	0.216335	1.65499	1.43865	0.0241828	AP003072.2	---
ENSG00000052749	RRP12	ribosomal RNA processing 12 homolog	8.36288	8.77879	8.16455	8.74721	8.50587	8.53726	8.6745	10.7706	8.67086	9.2295	7.92989	9.36488	9.28562	9.76487	8.27281	8.01353	8.53872	9.03362	0.494896	0.0241847	RRP12	ribosomal RNA processing 12 homolog
ENSG00000164626	KCNK5	potassium two pore domain channel subfamily K member 5	11.2992	9.92785	8.16921	8.95921	7.66279	8.62138	8.2311	8.42114	9.60241	8.56835	8.82793	7.9649	7.95563	8.64386	7.60386	8.40916	8.98154	8.44414	-0.537401	0.0241888	KCNK5	potassium two pore domain channel subfamily K member 5
ENSG00000133424	LARGE1	LARGE xylosyl- and glucuronyltransferase 1	9.3925	9.24316	9.31916	8.17141	8.41564	8.89361	8.58392	9.06207	8.38815	8.52396	8.87119	8.08133	7.97954	7.88264	8.38199	8.21924	8.85991	8.37668	-0.483236	0.024189	LARGE1	LARGE xylosyl- and glucuronyltransferase 1
ENSG00000140945	CDH13	cadherin 13	7.07217	6.0813	7.30277	9.8274	8.03421	8.51788	7.22029	5.89124	7.63787	7.72973	7.65526	5.8765	7.34685	5.80735	7.88478	6.67714	7.72229	6.94519	-0.777097	0.0241904	CDH13	cadherin 13
ENSG00000196660	SLC30A10	solute carrier family 30 member 10	9.65547	10.6714	10.2482	8.06935	9.83502	9.85009	9.15947	5.77403	8.48182	9.57043	9.30896	8.06445	8.25891	7.14975	9.44368	9.82895	9.64128	8.43122	-1.21006	0.0242362	SLC30A10	solute carrier family 30 member 10
ENSG00000119414	PPP6C	protein phosphatase 6 catalytic subunit	9.82568	10.6467	10.6173	9.84295	9.90467	9.90893	9.63204	10.0781	9.79884	10.8237	10.4931	10.7577	10.8894	10.23	10.7935	10.8086	10.054	10.5192	0.465179	0.0242846	PPP6C	protein phosphatase 6 catalytic subunit
ENSG00000204387	C6orf48	chromosome 6 open reading frame 48	8.89177	9.45185	8.74784	9.40052	9.16483	9.02639	8.45206	9.36534	9.67811	9.51994	9.19629	8.8417	9.20273	10.2527	9.70468	9.33341	9.01932	9.45498	0.435662	0.0242896	C6orf48	chromosome 6 open reading frame 48
ENSG00000118308	LRMP	lymphoid restricted membrane protein	6.57703	6.87243	7.93755	8.59858	7.4245	7.46729	6.853	5.4155	7.41422	6.88432	7.04897	7.05851	7.08999	5.80735	7.13999	6.23926	7.39005	6.67757	-0.712486	0.0243879	LRMP	lymphoid restricted membrane protein
ENSG00000234118	RPL13AP6	ribosomal protein L13a pseudogene 6	2.09008	2.15398	1.51434	1.88167	0	0	1.66096	0	1.01543	1.03271	0	0	0	0	0	0	1.32872	0.227571	-1.10115	0.0244111	RPL13AP6	ribosomal protein L13a pseudogene 6
ENSG00000105088	OLFM2	olfactomedin 2	10.2787	9.10233	9.15265	9.05214	9.51913	11.918	8.6041	9.07699	6.58496	8.73343	6.78309	9.93603	9.24477	7.3837	9.63757	8.89196	9.661	8.47472	-1.18628	0.0244336	OLFM2	olfactomedin 2
ENSG00000180998	GPR137C	G protein-coupled receptor 137C	4.66862	5.36654	6.08408	5.65034	5.72213	6.41385	4.69299	4.35409	5.15911	3.64438	4.49307	4.52667	2.76719	4.45943	5.45256	5.80074	5.51408	4.51747	-0.996608	0.0244548	GPR137C	G protein-coupled receptor 137C
ENSG00000100207	TCF20	transcription factor 20	8.73791	8.78256	10.7209	8.55118	8.51459	8.88229	8.63582	8.9148	8.6995	9.33139	8.32858	9.09814	9.19458	9.28309	9.36074	9.17382	8.97504	9.04274	0.0677004	0.0244757	TCF20	transcription factor 20
ENSG00000230356	NCAPD2P1	non-SMC condensin I complex subunit D2 pseudogene 1	1.78378	0	0	1.48027	0	2.57451	1.66096	0	0	0	0	0	0	0	0	0	1.07136	0	-1.07136	0.0244888	NCAPD2P1	non-SMC condensin I complex subunit D2 pseudogene 1
ENSG00000232702	AL158050.1	---	4.88288	5.05333	4.8962	5.16612	4.99332	4.88269	4.75207	5.35148	5.23933	5.67812	5.18399	5.76949	5.61829	6.50779	5.00543	4.7347	4.94666	5.45429	0.507632	0.0246387	AL158050.1	---
ENSG00000187097	ENTPD5	ectonucleoside triphosphate diphosphohydrolase 5	13.419	12.9285	12.4875	10.8015	12.6919	12.7282	11.7208	9.76455	11.6969	11.503	12.9201	11.2321	10.8805	10.2046	11.8972	12.4144	12.3968	11.3904	-1.00639	0.0246411	ENTPD5	ectonucleoside triphosphate diphosphohydrolase 5
ENSG00000105697	HAMP	hepcidin antimicrobial peptide	13.3532	11.7385	12.7113	11.8449	11.7277	12.3571	12.4518	13.6054	11.8409	13.175	12.9128	13.559	13.2389	14.1796	12.7057	11.7248	12.3121	12.9936	0.681474	0.0246972	HAMP	hepcidin antimicrobial peptide
ENSG00000136003	ISCU	iron-sulfur cluster assembly enzyme	10.6538	10.4673	10.7034	10.1855	10.2444	10.216	10.5229	11.2737	10.6185	10.3673	10.4815	10.5184	10.6937	10.9823	10.7583	11.0576	10.4276	10.7501	0.322514	0.024735	ISCU	iron-sulfur cluster assembly enzyme
ENSG00000055044	NOP58	NOP58 ribonucleoprotein	10.3206	10.4184	9.96564	10.8906	10.6247	10.3077	10.3687	11.1737	10.4829	11.0333	10.3157	10.8369	11.3251	12.0151	10.2818	10.3835	10.4138	10.872	0.458232	0.0247861	NOP58	NOP58 ribonucleoprotein
ENSG00000025708	TYMP	thymidine phosphorylase	9.39774	9.27565	9.48159	10.4483	11.1229	9.7643	10.9255	11.8657	10.6889	11.162	10.1567	11.0077	11.3385	11.567	9.98637	9.78582	10.0594	10.8399	0.780439	0.0248106	TYMP	thymidine phosphorylase
ENSG00000139187	KLRG1	killer cell lectin like receptor G1	4.24164	6.19891	6.8936	8.21552	5.83782	7.22593	4.42905	3.35928	5.64478	4.58551	5.64922	5.79699	5.88455	3.45943	6.35261	6.19407	6.14892	5.21405	-0.934875	0.0248363	KLRG1	killer cell lectin like receptor G1
ENSG00000267834	AL592211.1	---	0	0	0	0	0	0	0	0	2.02308	0	1.72491	0	2.57969	0	3.13425	2.16809	0	1.29222	1.29222	0.0248458	AL592211.1	---
ENSG00000261026	AC105046.1	---	0	0	0	0	0	0	0	2.49343	2.02308	2.0488	0	0	2.11061	3	0	0	0	1.29732	1.29732	0.0248603	AC105046.1	---
ENSG00000003436	TFPI	tissue factor pathway inhibitor	12.112	11.6653	12.6955	12.0326	12.6195	12.729	12.8832	12.3803	13.043	12.947	12.4264	12.6913	12.5184	13.7906	13.1069	13.2471	12.391	12.9056	0.514631	0.0248672	TFPI	tissue factor pathway inhibitor
ENSG00000168314	MOBP	myelin-associated oligodendrocyte basic protein	2.90985	3.77104	5.10519	4.09677	2.10621	3.44802	0	3.5987	0	0	1.72491	0	0	2.32193	7.01539	0	3.06244	1.62899	-1.43345	0.0249449	MOBP	myelin-associated oligodendrocyte basic protein
ENSG00000162543	UBXN10	UBX domain protein 10	7.65355	6.0813	7.58675	6.98072	7.8258	7.36256	8.0779	9.35109	7.64525	8.75804	6.54263	9.97267	8.78918	9.59246	6.38654	4.11325	7.36694	7.90568	0.538738	0.0249479	UBXN10	UBX domain protein 10
ENSG00000189306	RRP7A	ribosomal RNA processing 7 homolog A	9.41505	8.67706	8.87594	9.43451	9.5385	9.1853	9.78837	11.1737	9.23031	10.0759	9.26638	9.73917	9.65427	10.3117	9.04999	9.61634	9.27353	9.79087	0.517335	0.0249538	RRP7A	ribosomal RNA processing 7 homolog A
ENSG00000146109	ABT1	activator of basal transcription 1	8.89917	8.75594	8.92361	8.99761	9.21384	9.15426	8.76333	9.22054	9.36827	9.60958	8.86169	9.63252	9.28562	9.84862	8.82717	8.98444	8.95825	9.29316	0.334908	0.0249696	ABT1	activator of basal transcription 1
ENSG00000171295	ZNF440	zinc finger protein 440	4.3608	7.54054	4.42112	6.36537	6.56466	2.57451	5.01582	7.34953	6.93733	7.05289	7.22233	7.80475	6.36298	7.76818	3.96235	7.91253	5.26326	6.93032	1.66706	0.0249939	ZNF440	zinc finger protein 440
ENSG00000138685	FGF2	fibroblast growth factor 2	3.6325	4.89503	8.31512	8.36006	7.19423	6.99317	8.25171	7.59044	8.01926	8.54834	8.61821	6.98866	9.27985	8.67596	9.24296	8.99765	6.80597	8.44015	1.63417	0.025049	FGF2	fibroblast growth factor 2
ENSG00000174109	C16orf91	chromosome 16 open reading frame 91	7.58177	7.03309	6.46376	6.59642	7.05771	7.49729	7.23071	8.52636	7.139	8.03023	7.24444	7.63225	7.65072	8.45121	7.0262	6.81784	7.06582	7.61314	0.547317	0.0250749	C16orf91	chromosome 16 open reading frame 91
ENSG00000186204	CYP4F12	cytochrome P450 family 4 subfamily F member 12	10.1241	10.4001	9.42815	9.01269	9.64756	9.57805	8.90997	8.74767	8.75513	8.22939	9.1849	9.26501	9.08644	7.60733	8.02604	10.1638	9.5858	8.78508	-0.800721	0.0251434	CYP4F12	cytochrome P450 family 4 subfamily F member 12
ENSG00000119471	HSDL2	hydroxysteroid dehydrogenase like 2	13.2611	12.5124	12.4003	11.6389	12.3051	12.6315	12.4946	11.3194	11.4983	11.6149	12.637	12.3738	11.4246	11.9304	12.3283	12.1753	12.4634	11.9225	-0.540969	0.0251458	HSDL2	hydroxysteroid dehydrogenase like 2
ENSG00000150625	GPM6A	glycoprotein M6A	8.26315	8.11396	9.11692	9.53714	7.95314	8.23304	7.39726	6.26587	8.09127	7.97133	8.22121	7.11424	7.13326	7.42626	8.46374	8.23605	8.37351	7.65814	-0.715375	0.0251503	GPM6A	glycoprotein M6A
ENSG00000100632	ERH	ERH, mRNA splicing and mitosis factor	10.9226	11.0737	10.757	11.3294	11.2953	10.9576	10.8267	11.4551	11.3849	11.9746	10.799	11.1723	11.3898	11.7065	10.9794	11.4943	11.0232	11.3729	0.349717	0.0251591	ERH	ERH, mRNA splicing and mitosis factor
ENSG00000173890	GPR160	G protein-coupled receptor 160	5.43796	6.05659	6.95965	8.04511	7.26828	6.90641	7.25133	5.5356	7.15976	6.49023	6.74225	5.8765	6.10924	6.02237	5.66103	6.28307	6.84648	6.20889	-0.637584	0.0251631	GPR160	G protein-coupled receptor 160
ENSG00000274993	AC254629.1	---	5.43796	1.72262	0	0	0	0	0	2.90374	2.61058	0	1.72491	2.64384	0	3.70044	0	3.78789	1.02294	1.93016	0.907215	0.0252526	AC254629.1	---
ENSG00000037474	NSUN2	NOP2/Sun RNA methyltransferase family member 2	10.105	10.5032	10.9669	10.2674	10.5745	10.9656	10.911	11.4655	11.1021	11.1901	10.4768	10.9001	11.2135	11.3399	10.9442	10.5202	10.6134	11.0169	0.403575	0.0252528	NSUN2	NOP2/Sun RNA methyltransferase family member 2
ENSG00000172380	GNG12	G protein subunit gamma 12	11.5685	11.593	11.809	11.3414	11.4925	11.5138	11.4129	10.5628	11.518	11.4266	11.4232	11.1229	10.7476	11.3021	11.3793	11.1425	11.533	11.1806	-0.352457	0.0252612	GNG12	G protein subunit gamma 12
ENSG00000182118	FAM89A	family with sequence similarity 89 member A	8.16422	8.04653	8.48547	7.74154	8.35867	8.17236	8.57985	8.70988	8.24004	8.58417	7.58193	8.59374	9.28753	9.35755	8.92855	8.6415	8.22123	8.65832	0.437087	0.025308	FAM89A	family with sequence similarity 89 member A
ENSG00000163638	ADAMTS9	ADAM metallopeptidase with thrombospondin type 1 motif 9	8.48268	7.13105	7.88185	8.97982	9.27157	8.35271	9.49825	10.7744	8.5852	8.67557	8.49762	8.93441	10.663	11.7448	8.54111	7.90554	8.51399	9.36908	0.855091	0.0253308	ADAMTS9	ADAM metallopeptidase with thrombospondin type 1 motif 9
ENSG00000273444	AC006023.2	---	2.09008	2.98205	0	1.48027	1.67975	1.7984	2.41266	0	0	1.62842	0	0	0	0	0.980041	1.73532	1.7776	0.482642	-1.29496	0.0253347	AC006023.2	---
ENSG00000240972	MIF	macrophage migration inhibitory factor (glycosylation-inhibiting factor)	11.2983	11.0465	9.65607	10.6107	10.0209	10.5511	10.8979	10.6758	11.4942	11.3425	10.3594	11.0675	11.4768	11.1874	11.0205	11.8208	10.5831	11.1605	0.57747	0.0253579	MIF	macrophage migration inhibitory factor (glycosylation-inhibiting factor)
ENSG00000106560	GIMAP2	GTPase, IMAP family member 2	8.01777	8.70516	8.86449	9.42703	8.36351	8.53244	8.22068	7.93973	7.52238	7.30269	8.79835	7.74951	7.9508	6.98868	8.39871	8.71532	8.59015	7.92957	-0.66058	0.0254021	GIMAP2	GTPase, IMAP family member 2
ENSG00000138074	SLC5A6	solute carrier family 5 member 6	10.0495	10.7886	10.5941	8.81472	10.5983	10.5511	12.0295	11.3998	9.99356	12.2717	11.5972	12.9765	11.6867	12.7597	10.3671	9.21964	10.4894	11.3635	0.874139	0.0254023	SLC5A6	solute carrier family 5 member 6
ENSG00000149782	PLCB3	phospholipase C beta 3	8.23222	8.5277	8.87023	8.9618	8.08192	8.8164	8.65915	8.50812	8.15471	7.92241	8.62103	8.27959	8.35344	8.0607	8.28636	8.185	8.59278	8.26348	-0.329292	0.0254238	PLCB3	phospholipase C beta 3
ENSG00000241081	AF111169.1	---	1.78378	1.10446	1.9203	2.6713	3.12318	1.16296	2.67935	3.70498	3.83588	3.05677	2.02649	2.05309	2.57969	3.16993	3.77007	3.78789	2.06362	3.10942	1.0458	0.0254609	AF111169.1	---
ENSG00000198734	F5	coagulation factor V	13.5965	13.6721	14.1061	11.7371	12.8352	13.7927	13.4405	12.0048	12.9428	12.5371	13.2518	13.1646	12.1095	12.6782	13.0973	13.1201	13.3114	12.7674	-0.544076	0.0254631	F5	coagulation factor V
ENSG00000232699	BDH2P1	3-hydroxybutyrate dehydrogenase 2, pseudogene 1	4.80095	6.59193	3.60171	3.3147	3.5872	3.60318	3.5621	2.71312	3.93556	0	3.73298	3.38541	3.08188	0	3.96235	4.01274	4.15168	2.75823	-1.39346	0.025492	BDH2P1	3-hydroxybutyrate dehydrogenase 2, pseudogene 1
ENSG00000107833	NPM3	nucleophosmin/nucleoplasmin 3	6.68374	6.81464	6.23395	7.6023	7.78314	7.43666	7.63552	8.69383	8.064	8.38192	7.21489	7.9949	7.70909	7.7879	7.19848	7.10095	7.16999	7.79399	0.624	0.0255358	NPM3	nucleophosmin/nucleoplasmin 3
ENSG00000183793	NPIPA5	nuclear pore complex interacting protein family member A5	7.22135	6.928	7.11264	8.55118	7.09307	6.84553	7.44279	8.4558	7.46515	7.61896	7.50466	7.59356	8.7085	7.66534	7.87883	9.07134	7.31351	7.99579	0.682283	0.0255619	NPIPA5	nuclear pore complex interacting protein family member A5
ENSG00000156873	PHKG2	phosphorylase kinase catalytic subunit gamma 2	9.10735	8.68111	8.74472	9.15312	8.8191	8.5985	8.9703	9.29475	9.32066	8.64574	8.68439	9.34172	9.42969	10.3465	8.9024	9.56179	8.86774	9.28085	0.41311	0.0255718	PHKG2	phosphorylase kinase catalytic subunit gamma 2
ENSG00000276566	IGKV1D-13	immunoglobulin kappa variable 1D-13	3.81053	3.77104	3.80702	7.34869	5.38436	5.97633	3.27039	4.53789	4.98391	3.22758	1.72491	4.15378	5.46413	3.32193	3.54816	3.3671	4.76691	3.81438	-0.952531	0.0255803	IGKV1D-13	immunoglobulin kappa variable 1D-13
ENSG00000113369	ARRDC3	arrestin domain containing 3	10.0102	9.98464	9.86007	10.0435	10.4786	10.2472	9.71418	10.6063	9.27857	10.3173	11.2727	9.82518	10.3317	10.5098	11.6924	10.7935	10.0483	10.5142	0.465838	0.0256032	ARRDC3	arrestin domain containing 3
ENSG00000138002	IFT172	intraflagellar transport 172	7.85476	8.04024	7.18806	8.04021	7.48786	7.22593	7.74863	6.96711	7.65259	6.90964	7.70924	7.05851	7.22413	7.11894	7.09964	7.50413	7.6551	7.24933	-0.405772	0.0256183	IFT172	intraflagellar transport 172
ENSG00000137491	SLCO2B1	solute carrier organic anion transporter family member 2B1	12.8773	12.1132	10.9228	10.6271	10.5094	11.5848	10.4689	9.71612	10.911	11.0877	11.9255	11.2688	9.67491	9.79766	9.53728	9.59911	11.3005	10.3909	-0.909604	0.0256473	SLCO2B1	solute carrier organic anion transporter family member 2B1
ENSG00000162971	TYW5	tRNA-yW synthesizing protein 5	8.58719	8.1898	8.33599	7.66726	8.08778	8.31391	8.52586	8.04972	7.39683	7.8846	8.16438	7.86447	7.60841	8.09276	7.49918	8.23605	8.24397	7.86627	-0.377703	0.0257687	TYW5	tRNA-yW synthesizing protein 5
ENSG00000166401	SERPINB8	serpin family B member 8	8.22831	6.62593	6.81251	7.41828	8.21627	7.57435	8.21018	9.83208	8.50634	8.98939	6.85189	8.10353	8.05799	9.55075	8.11982	6.40706	7.58369	8.26876	0.685068	0.0258196	SERPINB8	serpin family B member 8
ENSG00000165502	RPL36AL	ribosomal protein L36a like	11.6844	11.8389	11.641	12.1687	11.7674	11.7491	11.755	11.8696	12.0579	12.6637	11.3042	12.0307	12.3091	12.8576	12.0732	12.398	11.8006	12.1738	0.373135	0.025911	RPL36AL	ribosomal protein L36a like
ENSG00000135905	DOCK10	dedicator of cytokinesis 10	8.72408	8.81609	9.58111	10.387	9.40418	9.17296	9.21301	7.4825	9.11012	8.90062	9.27893	9.23767	8.94302	7.9542	9.04734	8.37919	9.32834	8.70373	-0.624612	0.0259171	DOCK10	dedicator of cytokinesis 10
ENSG00000141551	CSNK1D	casein kinase 1 delta	10.2749	10.3167	10.5643	10.4821	10.3123	10.3617	10.4082	11.2564	10.4622	10.6336	10.2751	10.6496	11.2489	11.3652	10.3403	10.3822	10.3886	10.7348	0.346226	0.0259439	CSNK1D	casein kinase 1 delta
ENSG00000223768	LINC00205	long intergenic non-protein coding RNA 205	5.56749	3.99569	4.35721	4.70377	4.13159	4.54257	3.91215	6.3985	3.61312	3.05677	4.03304	4.31468	3.55899	3.70044	2.77297	4.45718	4.45864	3.98952	-0.469118	0.0259714	LINC00205	long intergenic non-protein coding RNA 205
ENSG00000053501	USE1	unconventional SNARE in the ER 1	7.58789	8.25099	8.12192	7.92805	7.87403	8.02229	7.98245	8.28639	7.98477	8.63059	8.08901	8.11996	8.16194	8.37938	8.25455	8.35373	7.9668	8.25115	0.284344	0.0259819	USE1	unconventional SNARE in the ER 1
ENSG00000175756	AURKAIP1	aurora kinase A interacting protein 1	10.38	9.90033	9.32125	10.094	9.85232	9.62635	9.61424	10.4248	10.4046	10.2838	9.57917	9.86471	10.5613	10.207	9.99602	10.9521	9.82692	10.2526	0.425694	0.0259898	AURKAIP1	aurora kinase A interacting protein 1
ENSG00000254837	AP001372.2	---	7.20552	6.99457	6.25164	6.4564	5.6917	6.41385	5.39517	5.06256	6.00749	5.45551	6.54263	5.15581	5.05995	3.70044	5.28275	6.52123	6.34412	5.42093	-0.923193	0.02601	AP001372.2	---
ENSG00000148926	ADM	adrenomedullin	8.97118	8.23456	8.25501	9.69346	8.49269	9.25132	8.0894	10.6904	9.60619	8.78565	8.44451	8.03009	9.88571	10.5401	8.681	9.69751	8.71252	9.37347	0.66095	0.0261407	ADM	adrenomedullin
ENSG00000161999	JMJD8	jumonji domain containing 8	8.86682	8.78633	8.73218	8.76216	8.7208	8.89361	9.24935	8.49337	10.0586	9.08417	8.89001	9.88407	9.18227	8.55459	9.30638	10.0994	8.85875	9.28365	0.424899	0.0261668	JMJD8	jumonji domain containing 8
ENSG00000197136	PCNX3	pecanex homolog 3	8.48596	8.47271	8.97508	8.82614	8.70184	8.43249	8.83339	9.70335	9.18039	9.69762	9.04288	9.36947	8.92097	9.10852	8.6638	7.99389	8.67537	9.07565	0.40028	0.0261816	PCNX3	pecanex homolog 3
ENSG00000264546	AC008026.3	---	0	2.48561	1.9203	0.922201	0	0	2.08522	0	0	0	0	0	0	0	0	0	1.05905	0	-1.05905	0.0262144	AC008026.3	---
ENSG00000214889	RPS9P1	ribosomal protein S9 pseudogene 1	0	2.48561	0	3.02857	3.29498	0	0	0	0	0	0	0	0	0	0	0	1.25845	0	-1.25845	0.0262811	RPS9P1	ribosomal protein S9 pseudogene 1
ENSG00000118193	KIF14	kinesin family member 14	3.89193	4.83816	3.22575	4.5469	5.86535	5.66012	3.68846	2.90374	2.02308	2.63908	5.15316	3.06176	3.65713	4.70044	1.96996	2.50056	4.53095	3.17877	-1.35219	0.0263084	KIF14	kinesin family member 14
ENSG00000013275	PSMC4	proteasome 26S subunit, ATPase 4	10.7748	10.7477	10.684	10.8022	10.9122	10.9816	10.7409	11.0638	11.0179	11.7442	10.528	11.2252	11.2675	11.5527	10.6118	11.1536	10.8062	11.1294	0.323207	0.0263416	PSMC4	proteasome 26S subunit, ATPase 4
ENSG00000128595	CALU	calumenin	10.8223	10.9954	11.1288	10.5239	11.7431	11.445	11.5346	12.6091	11.423	11.166	11.1638	11.9595	11.7451	12.5404	11.5244	11.0763	11.1704	11.6897	0.519309	0.0263778	CALU	calumenin
ENSG00000280193	AC132219.2	---	3.6325	4.36128	5.18098	4.01926	3.29498	3.74326	3.80463	3.70498	3.34958	2.0488	3.24091	2.05309	2.9331	3.45943	4.04966	3.52141	4.00527	3.15122	-0.854054	0.0263786	AC132219.2	---
ENSG00000095539	SEMA4G	semaphorin 4G	10.5178	10.1746	10.0937	7.28388	8.81205	9.95468	8.78824	8.19815	9.24009	7.90363	10.1779	8.99207	8.09348	7.82655	8.18876	8.61174	9.37501	8.58138	-0.793628	0.0263795	SEMA4G	semaphorin 4G
ENSG00000148229	POLE3	DNA polymerase epsilon 3, accessory subunit	9.60657	10.0009	9.79823	9.71666	9.98058	10.0008	9.97816	10.9776	10.223	11.1554	9.93793	10.3063	10.0595	10.5048	9.79432	9.43401	9.86885	10.2659	0.39704	0.0263857	POLE3	DNA polymerase epsilon 3, accessory subunit
ENSG00000091127	PUS7	pseudouridylate synthase 7 (putative)	7.97638	8.61069	8.48921	8.88195	9.31215	8.82431	8.58798	9.15173	9.18292	10.0333	8.24699	9.2149	9.35489	9.61102	8.92855	8.69113	8.66895	9.15727	0.488321	0.0264503	PUS7	pseudouridylate synthase 7 (putative)
ENSG00000138688	KIAA1109	KIAA1109	11.2256	10.8653	11.741	10.8051	11.3705	11.3787	11.4679	9.84521	10.9993	10.6279	11.5694	10.8016	10.6755	10.332	10.8524	11.0763	11.2649	10.7533	-0.511563	0.0264948	KIAA1109	KIAA1109
ENSG00000137767	SQOR	sulfide quinone oxidoreductase	10.8745	10.6805	10.6418	10.2206	10.7314	10.8609	10.9759	11.9502	11.2969	11.315	10.7477	11.1638	10.7772	12.3278	10.5096	10.386	10.7122	11.1638	0.451569	0.0265026	SQOR	sulfide quinone oxidoreductase
ENSG00000025434	NR1H3	nuclear receptor subfamily 1 group H member 3	9.97558	10.3245	9.62926	9.7182	9.24562	9.91078	9.48525	8.53359	9.40569	8.74754	9.74856	9.77246	8.99321	8.73809	9.24758	9.85277	9.7556	9.22661	-0.528991	0.026582	NR1H3	nuclear receptor subfamily 1 group H member 3
ENSG00000186814	ZSCAN30	zinc finger and SCAN domain containing 30	7.37789	7.71653	7.31964	8.00546	7.78314	7.51694	8.29705	6.19468	6.8506	6.60318	8.09308	6.57741	7.52638	6	6.46805	7.82632	7.71666	6.90441	-0.812254	0.0265921	ZSCAN30	zinc finger and SCAN domain containing 30
ENSG00000166166	TRMT61A	tRNA methyltransferase 61A	7.80309	7.90139	7.05338	7.6221	7.72422	7.31844	7.58767	8.67106	7.79874	8.60757	6.98038	8.12539	8.32012	8.21432	7.36943	8.12005	7.5729	8.02301	0.450109	0.0266058	TRMT61A	tRNA methyltransferase 61A
ENSG00000185885	IFITM1	interferon induced transmembrane protein 1	10.0606	9.96485	11.118	11.1277	11.1788	10.986	11.395	9.85823	11.525	11.8032	11.6944	11.1951	11.7367	12.0515	12.0601	10.9177	10.833	11.4269	0.593902	0.0266292	IFITM1	interferon induced transmembrane protein 1
ENSG00000154620	TMSB4Y	thymosin beta 4, Y-linked	3.05829	2.15398	1.9203	4.49058	4.59331	0	3.27039	4.28722	5.93708	5.1503	4.80213	2.05309	3.34007	4.64386	4.28377	4.8557	2.78383	4.37258	1.58875	0.0266431	TMSB4Y	thymosin beta 4, Y-linked
ENSG00000090686	USP48	ubiquitin specific peptidase 48	10.1788	10.3361	10.2937	10.0987	9.93259	10.3698	10.2673	10.3743	9.77044	9.79085	9.97476	10.1364	9.9379	9.72281	10.0393	9.70155	10.211	9.93871	-0.272285	0.0266491	USP48	ubiquitin specific peptidase 48
ENSG00000221500	SNORD100	small nucleolar RNA, C/D box 100	0	2.48561	0.947361	1.88167	1.67975	2.23802	1.66096	2.71312	3.19724	2.37392	2.2758	1.63225	3.45368	3	1.96996	2.99794	1.5562	2.62377	1.06757	0.0267573	SNORD100	small nucleolar RNA, C/D box 100
ENSG00000257557	PPP1R12A-AS1	PPP1R12A antisense RNA 1	4.5229	4.77895	2.49613	3.55337	3.93775	3.27414	3.09895	0	2.61058	2.37392	3.35366	2.37849	3.08188	2.58496	3.86941	2.77058	3.66603	2.55817	-1.10786	0.0267621	PPP1R12A-AS1	PPP1R12A antisense RNA 1
ENSG00000135482	ZC3H10	zinc finger CCCH-type containing 10	5.13774	4.43984	7.24214	3.7581	6.59786	3.07639	4.10576	5.06256	7.6155	7.70101	7.06562	7.78429	7.73741	3	7.44385	4.20722	4.90826	6.40194	1.49368	0.0268033	ZC3H10	zinc finger CCCH-type containing 10
ENSG00000139675	HNRNPA1L2	heterogeneous nuclear ribonucleoprotein A1-like 2	5.0694	6.62593	6.4485	5.59798	7.20504	6.28222	4.91603	5.86855	8.28326	9.20158	6.5065	5.31649	6.89257	7.34873	6.22712	5.53685	6.02073	6.79796	0.77723	0.0268346	HNRNPA1L2	heterogeneous nuclear ribonucleoprotein A1-like 2
ENSG00000171634	BPTF	bromodomain PHD finger transcription factor	10.4337	10.2758	10.6568	10.516	10.2947	10.3617	10.3109	9.91053	10.1842	10.2042	10.3678	9.94374	9.94156	8.67948	10.3019	9.89927	10.4071	9.93697	-0.470118	0.0268412	BPTF	bromodomain PHD finger transcription factor
ENSG00000127329	PTPRB	protein tyrosine phosphatase, receptor type B	10.3649	11.2557	11.0253	12.878	10.0117	11.0312	10.4071	9.90915	11.4411	10.3933	10.8854	9.70146	9.49419	9.31515	10.8448	10.7117	10.9963	10.2996	-0.696686	0.0268626	PTPRB	protein tyrosine phosphatase, receptor type B
ENSG00000158985	CDC42SE2	CDC42 small effector 2	7.99031	10.1101	8.52237	8.75021	8.38268	9.72047	10.0057	9.83354	10.3424	9.22698	8.2972	10.2188	10.4493	10.4105	10.2383	10.1025	9.06883	9.90216	0.833329	0.0268821	CDC42SE2	CDC42 small effector 2
ENSG00000198796	ALPK2	alpha kinase 2	9.28925	8.66075	8.6038	8.06935	9.18955	6.21161	9.51113	7.0899	7.09656	4.38346	5.85478	7.81151	8.7508	6.83289	9.11975	7.35814	8.50506	7.1442	-1.36087	0.0269252	ALPK2	alpha kinase 2
ENSG00000180658	OR2A4	olfactory receptor family 2 subfamily A member 4	4.71409	4.43984	3.89967	4.97408	4.77846	4.38036	5.19682	6.9127	5.58464	5.23287	6.1946	3.64959	4.06729	7.25739	4.13199	4.11325	4.62619	5.23826	0.61207	0.0269408	OR2A4	olfactory receptor family 2 subfamily A member 4
ENSG00000133731	IMPA1	inositol monophosphatase 1	9.60958	9.57226	9.60367	9.32804	9.26383	9.16986	9.56977	10.0657	9.50029	10.1008	9.2336	9.41899	9.56543	10.0553	9.93282	9.97134	9.44529	9.76048	0.315189	0.0269475	IMPA1	inositol monophosphatase 1
ENSG00000160255	ITGB2	integrin subunit beta 2	9.76486	9.8634	10.4095	11.7645	10.5503	10.2009	10.4185	8.91757	10.5034	9.37749	10.3952	9.81344	10.155	9.6987	10.3787	9.08068	10.4246	9.81336	-0.611199	0.0269503	ITGB2	integrin subunit beta 2
ENSG00000120860	WASHC3	WASH complex subunit 3	9.79162	9.43036	9.23498	9.16216	9.17862	9.17914	9.12077	8.80257	8.80541	8.41324	8.73471	9.17877	9.48085	8.84862	9.04203	9.14145	9.29966	8.93863	-0.361035	0.0270335	WASHC3	WASH complex subunit 3
ENSG00000156886	ITGAD	integrin subunit alpha D	5.56749	7.17764	8.05802	7.07949	3.44848	6.39273	4.35477	1.91789	5.35186	6.10814	5.64922	4.76816	3.55899	3.58496	6.60407	5.60748	6.01123	4.79453	-1.2167	0.0270377	ITGAD	integrin subunit alpha D
ENSG00000184840	TMED9	transmembrane p24 trafficking protein 9	11.8036	11.9692	11.4862	11.7548	11.8915	11.9822	12.3476	12.3355	11.9244	13.3073	11.7849	12.5364	12.256	12.6976	11.8768	12.0822	11.8907	12.3112	0.420525	0.0270424	TMED9	transmembrane p24 trafficking protein 9
ENSG00000264743	DPRXP4	divergent-paired related homeobox pseudogene 4	0	0	1.51434	0	0	0	1.05737	2.23417	2.02308	2.63908	0	2.05309	1.80284	2.32193	0	1.73532	0.367388	1.6455	1.27811	0.0271405	DPRXP4	divergent-paired related homeobox pseudogene 4
ENSG00000137509	PRCP	prolylcarboxypeptidase	11.7487	11.4738	11.9078	11.9208	12.1226	11.8848	11.6652	10.9243	11.3021	11.561	11.6143	11.8373	11.4428	11.2461	11.9184	11.3722	11.8177	11.4687	-0.348936	0.0271515	PRCP	prolylcarboxypeptidase
ENSG00000197563	PIGN	phosphatidylinositol glycan anchor biosynthesis class N	9.0663	9.30218	9.30652	8.55461	8.19473	8.86705	8.87717	8.73518	8.14952	7.80587	9.1849	8.89358	7.80855	8.18488	8.33061	7.70271	8.88122	8.31065	-0.570577	0.0271613	PIGN	phosphatidylinositol glycan anchor biosynthesis class N
ENSG00000170161	AL512625.1	---	4.62166	4.51433	4.14651	4.5469	4.5259	5.25456	5.23873	5.59209	5.73055	5.45551	3.81405	5.27796	6.37745	6.96578	3.86941	4.96734	4.69266	5.33891	0.646249	0.0271633	AL512625.1	---
ENSG00000273155	AC092587.1	---	0	3.17812	0.947361	0	0	0	0	2.23417	3.72879	2.0488	2.02649	0	0.871594	4.24793	3.66337	4.01274	0.589354	2.5371	1.94775	0.0271789	AC092587.1	---
ENSG00000283845	MIR4721	microRNA 4721	3.31596	2.75508	0.947361	0.922201	1.67975	2.84716	2.08522	0.945781	1.01543	1.03271	0.822554	1.03561	0.871594	1	2.28986	1.11421	2.07896	1.12531	-0.953656	0.0271926	MIR4721	microRNA 4721
ENSG00000106853	PTGR1	prostaglandin reductase 1	13.2359	13.6064	12.7714	11.5598	12.6578	13.2009	12.8588	11.2198	11.7194	12.1395	13.1084	11.7751	11.4864	10.9564	12.8425	12.9507	12.8416	12.022	-0.819566	0.0272971	PTGR1	prostaglandin reductase 1
ENSG00000177119	ANO6	anoctamin 6	11.9905	12.3611	12.515	11.3869	11.6892	11.9341	11.7115	10.9875	11.6236	11.4559	12.1472	11.7029	11.1695	11.1892	11.8953	11.288	11.9412	11.4955	-0.4457	0.027324	ANO6	anoctamin 6
ENSG00000173928	SWSAP1	SWIM-type zinc finger 7 associated protein 1	5.99347	5.87058	5.84872	5.42845	6.0685	6.57254	5.94354	6.04081	6.38787	6.19308	6.41851	6.68438	6.17698	6.26679	6.58957	6.78774	5.96083	6.39397	0.433142	0.0273826	SWSAP1	SWIM-type zinc finger 7 associated protein 1
ENSG00000263276	AC020978.8	---	7.76037	8.00191	7.37717	6.3176	6.22545	7.6205	7.45173	6.90156	6.47329	6.04098	6.70021	5.49503	7.2161	6.71425	6.4994	7.44749	7.25068	6.60981	-0.640863	0.0274217	AC020978.8	---
ENSG00000136536	2020-03-07	membrane associated ring-CH-type finger 7	10.0125	10.6259	10.5029	11.4137	9.8762	10.3356	10.6536	11.1995	10.8722	11.518	10.3551	10.6449	10.7518	11.4757	10.8832	11.5486	10.4886	11.0277	0.539058	0.0274639	2020-03-07	membrane associated ring-CH-type finger 7
ENSG00000168003	SLC3A2	solute carrier family 3 member 2	10.001	10.7506	10.2102	10.0459	10.737	10.0454	10.5356	12.6692	10.7075	11.83	9.87084	10.6114	11.1533	10.8963	9.81783	10.0368	10.3322	10.8437	0.511441	0.0274659	SLC3A2	solute carrier family 3 member 2
ENSG00000132535	DLG4	discs large MAGUK scaffold protein 4	8.25548	7.94244	7.46317	7.7714	6.99678	7.56494	7.7119	7.1848	6.7169	6.61862	7.61624	6.8511	7.30205	7.12928	7.4914	7.81143	7.6723	7.19131	-0.480988	0.0275148	DLG4	discs large MAGUK scaffold protein 4
ENSG00000275549	STPG3-AS1	STPG3 antisense RNA 1	5.29565	0	1.9203	4.43196	3.44848	1.7984	3.42361	1.91789	2.61058	0	2.98492	0	2.36413	0	0	2.99794	2.90263	1.43061	-1.47202	0.0275164	STPG3-AS1	STPG3 antisense RNA 1
ENSG00000173674	EIF1AX	eukaryotic translation initiation factor 1A, X-linked	11.0366	11.1989	11.1083	11.1726	11.2147	11.014	11.1026	11.6339	11.245	11.9172	10.991	11.2214	11.9368	11.9697	11.0904	11.0369	11.1211	11.4491	0.328044	0.0275172	EIF1AX	eukaryotic translation initiation factor 1A, X-linked
ENSG00000224631	RPS27AP16	ribosomal protein S27a pseudogene 16	7.61211	8.0212	7.44022	8.23279	7.76132	7.70003	8.0894	8.10415	8.87925	9.23702	7.6771	8.21478	8.13665	8.50779	8.21732	7.55862	7.83672	8.28141	0.444685	0.0275338	RPS27AP16	ribosomal protein S27a pseudogene 16
ENSG00000233593	AL590094.1	---	8.13526	8.0212	7.03307	6.39635	7.29889	6.861	6.30089	6.95639	6.83778	6.49023	7.06562	5.79699	6.40596	6.61471	6.61842	6.95959	7.14952	6.63841	-0.511113	0.0275436	AL590094.1	---
ENSG00000072121	ZFYVE26	zinc finger FYVE-type containing 26	9.16785	9.17876	9.88719	8.54081	9.31963	8.78026	9.12077	9.00079	8.50634	8.82278	9.22251	8.99504	8.68543	8.8009	8.26371	8.08953	9.14218	8.70967	-0.432512	0.0275656	ZFYVE26	zinc finger FYVE-type containing 26
ENSG00000237406	NDUFA9P1	NADH:ubiquinone oxidoreductase subunit A9 pseudogene 1	0	0	1.51434	0	2.10621	1.7984	2.08522	0	0	0	0	0	0	0	0	0	1.07203	0	-1.07203	0.0275662	NDUFA9P1	NADH:ubiquinone oxidoreductase subunit A9 pseudogene 1
ENSG00000152315	KCNK13	potassium two pore domain channel subfamily K member 13	2.55742	5.62373	6.00287	5.88692	5.78114	5.3453	5.72505	0	4.27702	3.86753	4.80213	5.56069	3.65713	2.32193	4.91531	4.53172	5.27463	3.77039	-1.50425	0.0275914	KCNK13	potassium two pore domain channel subfamily K member 13
ENSG00000225339	AL354740.1	---	9.95797	2.98205	4.94049	4.5469	2.10621	3.07639	0	4.21711	6.15954	0	6.31089	7.63986	2.11061	5.61471	8.83025	10.8067	3.94429	5.7433	1.79901	0.0276317	AL354740.1	---
ENSG00000197744	PTMAP2	prothymosin, alpha pseudogene 2	5.91774	7.43901	6.77632	6.66164	6.64628	6.49538	6.6032	7.3739	7.139	7.92862	6.70021	6.91526	7.33207	7.64386	6.61842	6.94603	6.64851	7.17748	0.528975	0.0276511	PTMAP2	prothymosin, alpha pseudogene 2
ENSG00000080608	PUM3	pumilio RNA binding family member 3	9.16785	9.11136	9.05027	9.55613	9.84542	9.67089	9.63988	10.602	9.66547	10.2582	9.14629	10.468	10.2106	10.6202	9.17904	8.96102	9.43454	9.90121	0.466665	0.02773	PUM3	pumilio RNA binding family member 3
ENSG00000105398	SULT2A1	sulfotransferase family 2A member 1	16.1522	14.61	14.6468	13.4656	13.7933	15.5734	13.0745	9.80395	13.6879	12.3168	14.2865	12.9928	11.6526	11.6078	13.9871	15.2886	14.4737	12.8471	-1.62659	0.0277509	SULT2A1	sulfotransferase family 2A member 1
ENSG00000119669	IRF2BPL	interferon regulatory factor 2 binding protein like	9.47902	9.88813	10.1584	9.40815	9.48182	9.55209	9.85557	9.87398	9.42296	9.64205	9.87675	10.2415	10.7793	10.4696	10.3008	10.1267	9.68903	10.0815	0.392486	0.0277718	IRF2BPL	interferon regulatory factor 2 binding protein like
ENSG00000196132	MYT1	myelin transcription factor 1	0	0	3.89967	1.88167	4.13159	3.27414	4.0122	4.14341	2.34653	4.76271	4.80213	5.85048	5.16377	4.75489	1.96996	4.45718	2.45704	4.25012	1.79308	0.0277918	MYT1	myelin transcription factor 1
ENSG00000175727	MLXIP	MLX interacting protein	10.0033	9.32822	11.1472	10.8548	10.9504	10.3105	11.4208	11.6593	10.7696	11.0548	10.5378	11.6924	12.2829	12.0795	10.8772	10.5202	10.5736	11.2749	0.701233	0.0277997	MLXIP	MLX interacting protein
ENSG00000229994	RPL5P4	ribosomal protein L5 pseudogene 4	5.43796	5.78289	4.75455	6.10895	6.22545	5.54995	5.50228	4.41799	7.06388	7.66429	5.60434	5.74145	6.19343	6.30378	6.46805	6.89046	5.62315	6.26085	0.637704	0.0278277	RPL5P4	ribosomal protein L5 pseudogene 4
ENSG00000106771	TMEM245	transmembrane protein 245	12.1191	11.3496	11.5298	10.3995	11.0355	11.0582	11.0862	10.969	10.4411	10.5159	10.6912	10.8913	10.439	11.1886	11.2556	10.9073	11.2254	10.811	-0.414424	0.0278444	TMEM245	transmembrane protein 245
ENSG00000112306	RPS12	ribosomal protein S12	12.7483	12.6934	12.2861	13.4473	13.1661	12.5819	12.8699	13.1138	13.8614	13.9638	12.6733	13.0064	13.3035	13.6347	13.1915	12.9117	12.8276	13.2956	0.467974	0.0278463	RPS12	ribosomal protein S12
ENSG00000172432	GTPBP2	GTP binding protein 2	9.25696	9.03433	9.04013	9.21743	10.1042	9.16986	10.1445	10.7506	9.44639	10.5685	9.19061	10.1683	11.0594	10.2992	9.32181	9.1592	9.42391	9.99601	0.572097	0.0278491	GTPBP2	GTP binding protein 2
ENSG00000237437	ASS1P12	argininosuccinate synthetase 1 pseudogene 12	0	0	1.9203	0	0	2.23802	0	3.07208	2.02308	3.22758	2.02649	2.05309	2.36413	1.58496	2.28986	0	0.594047	2.07125	1.47721	0.0278595	ASS1P12	argininosuccinate synthetase 1 pseudogene 12
ENSG00000196730	DAPK1	death associated protein kinase 1	10.4097	11.1675	11.8822	10.8624	10.7088	10.3792	10.848	10.3459	10.1599	9.92727	10.4165	10.543	10.4425	9.76818	11.0598	10.9622	10.894	10.4028	-0.491167	0.0278615	DAPK1	death associated protein kinase 1
ENSG00000279302	AC013643.3	---	0	0	0	0	0	0	0	2.90374	0	0	2.2758	0	2.11061	0	1.55829	2.16809	0	1.22406	1.22406	0.0278686	AC013643.3	---
ENSG00000136059	VILL	villin like	4.47087	3.64406	4.94049	7.21602	5.04239	4.0967	5.23873	5.56412	5.61502	5.5227	6.20966	4.92598	5.82245	5.16993	5.54561	3.90469	4.9499	5.36446	0.414566	0.0280211	VILL	villin like
ENSG00000234498	RPL13AP20	ribosomal protein L13a pseudogene 20	5.32526	5.87058	5.02519	6.09012	5.38436	5.15772	5.99335	5.99963	6.70282	6.84549	5.46067	5.85048	5.77951	6.45943	5.68849	6.23926	5.54951	6.11398	0.564463	0.0280598	RPL13AP20	ribosomal protein L13a pseudogene 20
ENSG00000091262	ABCC6	ATP binding cassette subfamily C member 6	11.0332	11.309	11.4227	10.1162	10.829	10.8278	11.2424	9.62598	9.96877	10.4815	10.9861	10.6345	10.084	9.67066	11.1228	10.8736	10.9686	10.3831	-0.585519	0.0280667	ABCC6	ATP binding cassette subfamily C member 6
ENSG00000105202	FBL	fibrillarin	9.77964	10.1918	10.074	10.6263	10.6437	10.0556	10.221	10.6977	10.8941	11.2989	9.97696	10.3359	10.6718	11.204	10.3174	10.3594	10.2274	10.6396	0.412149	0.028079	FBL	fibrillarin
ENSG00000102265	TIMP1	TIMP metallopeptidase inhibitor 1	11.7291	11.3259	11.4621	12.8122	12.6487	12.3268	13.5645	13.0223	13.2	11.942	11.7541	12.1371	14.1062	15.0552	13.113	13.2363	12.2671	13.0629	0.795851	0.0281329	TIMP1	TIMP metallopeptidase inhibitor 1
ENSG00000260372	AQP4-AS1	AQP4 antisense RNA 1	2.34259	2.15398	0	2.19535	1.67975	0	0	0.945781	0	0	0	0	0	0	0	0	1.19595	0.105087	-1.09087	0.0281572	AQP4-AS1	AQP4 antisense RNA 1
ENSG00000119328	FAM206A	family with sequence similarity 206 member A	9.0575	9.18733	8.85006	8.6952	9.17862	9.05692	9.36504	9.53884	9.15217	9.65895	8.89468	9.38087	9.59823	9.55651	8.95988	9.57947	9.05581	9.36884	0.313037	0.0281839	FAM206A	family with sequence similarity 206 member A
ENSG00000133112	TPT1	tumor protein, translationally-controlled 1	14.3782	14.9844	14.7037	14.5521	14.6263	14.1848	14.9962	15.5601	14.4276	14.7795	15.21	14.3284	15.3154	15.8495	14.6526	15.7772	14.6322	15.1	0.467785	0.028185	TPT1	tumor protein, translationally-controlled 1
ENSG00000102893	PHKB	phosphorylase kinase regulatory subunit beta	11.2098	11.1102	10.8012	10.4474	10.6136	10.994	10.7805	10.3551	10.0887	10.6288	11.0424	10.8168	10.5486	9.87191	10.4426	10.2751	10.8509	10.4522	-0.398701	0.0282216	PHKB	phosphorylase kinase regulatory subunit beta
ENSG00000228570	NUTM2E	NUT family member 2E	0	0	0	0	0	0	2.41266	3.89661	0	0	4.28131	3.38541	2.57969	3.32193	0	2.50056	0.344665	2.21839	1.87372	0.0282221	NUTM2E	NUT family member 2E
ENSG00000055332	EIF2AK2	eukaryotic translation initiation factor 2 alpha kinase 2	10.6662	10.2171	10.6326	10.1209	10.6457	10.5222	10.0883	9.99284	10.0819	9.85417	10.4494	9.82518	9.97643	10.4818	10.1899	10.1222	10.4133	10.1082	-0.305089	0.0282392	EIF2AK2	eukaryotic translation initiation factor 2 alpha kinase 2
ENSG00000100362	PVALB	parvalbumin	4.62166	4.83816	4.8962	7.03095	2.70251	2.57451	0	0	3.19724	0	3.96367	2.37849	3.99406	3.45943	3.77007	3.90469	3.80914	2.74085	-1.06829	0.0282409	PVALB	parvalbumin
ENSG00000149573	MPZL2	myelin protein zero like 2	9.7112	9.48696	8.79081	9.28108	9.60737	8.83609	9.923	7.84991	9.46736	9.30539	9.1541	8.57797	8.77559	9.14211	8.77367	8.84888	9.37664	8.87722	-0.499424	0.0282624	MPZL2	myelin protein zero like 2
ENSG00000177669	MBOAT4	membrane bound O-acyltransferase domain containing 4	3.31596	2.75508	3.48694	3.43896	3.12318	2.84716	2.41266	4.75138	2.02308	3.38029	3.64709	3.06176	3.74903	6.18982	2.77297	4.11325	3.05428	3.74319	0.688908	0.0283034	MBOAT4	membrane bound O-acyltransferase domain containing 4
ENSG00000278023	RDM1	RAD52 motif containing 1	2.09008	3.17812	0	0	0	3.27414	0	0	0	0	0	0	0	0	0	0	1.22033	0	-1.22033	0.0283241	RDM1	RAD52 motif containing 1
ENSG00000127954	STEAP4	STEAP4 metalloreductase	10.9478	11.6011	12.2724	11.7326	11.9093	12.5075	12.5591	12.6473	10.0122	11.2004	12.4149	13.3227	13.5476	15.3972	11.6234	11.4104	11.9328	12.3973	0.464534	0.0283382	STEAP4	STEAP4 metalloreductase
ENSG00000076555	ACACB	acetyl-CoA carboxylase beta	12.4462	12.2414	12.1793	10.9538	11.7486	13.3566	11.7369	9.90775	11.3543	11.9806	12.276	11.4771	11.6696	9.40301	11.325	11.7327	12.0947	11.2362	-0.858466	0.0283651	ACACB	acetyl-CoA carboxylase beta
ENSG00000280156	AC006548.3	---	2.09008	1.10446	1.51434	1.48027	1.07167	2.57451	2.67935	1.51221	0	1.03271	0	0	0	0	0.980041	1.73532	1.78781	0.584475	-1.20333	0.0283964	AC006548.3	---
ENSG00000091428	RAPGEF4	Rap guanine nucleotide exchange factor 4	8.98747	8.87735	8.45527	8.4661	9.51696	9.16364	9.33395	7.26518	8.43148	9.23702	8.86169	8.40107	7.31714	7.94837	8.56353	8.70328	8.97153	8.3032	-0.66834	0.0284629	RAPGEF4	Rap guanine nucleotide exchange factor 4
ENSG00000233381	AK4P3	adenylate kinase 4 pseudogene 3	5.51707	6.24339	6.0236	3.65936	4.83525	6.41385	4.86342	3.35928	5.23933	5.5227	5.08945	4.59094	4.38629	4.52356	4.86805	4.20722	5.36514	4.64298	-0.722155	0.0284753	AK4P3	adenylate kinase 4 pseudogene 3
ENSG00000226647	AL365356.1	---	1.39443	1.72262	0	0	2.10621	0	2.08522	0	0	0	0	0	0	0	0	0	1.04407	0	-1.04407	0.0285375	AL365356.1	---
ENSG00000260806	AL163051.1	---	3.19287	2.98205	2.23676	1.88167	3.5872	3.07639	3.27039	5.02201	3.19724	2.37392	3.11858	3.52354	4.49645	3.90689	2.96489	4.7347	2.88962	3.70425	0.814628	0.0285769	AL163051.1	---
ENSG00000113805	CNTN3	contactin 3	8.61443	8.1898	7.7134	6.78386	8.05229	8.5846	7.36923	6.53445	8.17014	7.08658	7.41005	7.91556	6.03816	6.88264	6.51483	7.80393	7.90109	7.1507	-0.750381	0.0285929	CNTN3	contactin 3
ENSG00000131187	F12	coagulation factor XII	11.4014	11.9009	11.1857	10.0038	11.6014	10.91	10.3781	8.62781	11.0558	11.1247	10.9702	10.3615	10.2988	10.4157	10.4335	9.63125	11.0545	10.3244	-0.730094	0.0286574	F12	coagulation factor XII
ENSG00000163660	CCNL1	cyclin L1	9.62604	10.104	9.77396	10.9302	10.1815	10.4765	10.5345	10.5778	10.9406	9.83282	10.2535	10.4861	11.2266	11.4979	10.6296	11.2284	10.2324	10.7415	0.509059	0.0287338	CCNL1	cyclin L1
ENSG00000279133	AC018628.1	---	3.42936	0	2.49613	4.79961	3.93775	0	3.27039	3.89661	5.42229	5.01686	3.64709	2.05309	4.98633	6.35755	3.96235	4.01274	2.56189	4.37277	1.81087	0.0287918	AC018628.1	---
ENSG00000253661	ZFHX4-AS1	ZFHX4 antisense RNA 1	3.31596	2.15398	2.49613	3.3147	3.44848	0	1.66096	0	0	0	1.72491	0	0	0	2.28986	2.50056	2.34146	0.723926	-1.61753	0.0287961	ZFHX4-AS1	ZFHX4 antisense RNA 1
ENSG00000213433	AC091982.1	---	3.89193	2.75508	4.06883	3.43896	3.12318	1.16296	3.42361	3.07208	1.01543	1.62842	1.34316	1.03561	2.11061	1.58496	2.77297	3.52141	3.12351	2.00941	-1.1141	0.0287969	AC091982.1	---
ENSG00000204152	TIMM23B	translocase of inner mitochondrial membrane 23 homolog B	6.50123	6.55711	6.52321	7.56868	7.4245	6.90641	7.38797	7.59735	7.95538	7.92241	7.59918	7.38282	6.99934	8.8392	7.36092	6.3464	6.9813	7.55589	0.574588	0.0288289	TIMM23B	translocase of inner mitochondrial membrane 23 homolog B
ENSG00000172354	GNB2	G protein subunit beta 2	10.5721	10.6322	10.7632	10.501	10.9286	10.9799	10.7849	11.0713	10.6518	11.3215	10.8801	11.4551	11.1897	11.1793	11.04	10.5202	10.7374	11.0343	0.296936	0.0288419	GNB2	G protein subunit beta 2
ENSG00000106344	RBM28	RNA binding motif protein 28	8.91386	9.27028	9.38273	9.26438	9.34674	9.00914	9.10102	9.92847	9.59861	9.97153	9.04288	9.48389	9.59359	9.62388	9.32837	8.94747	9.18402	9.50208	0.318055	0.0288748	RBM28	RNA binding motif protein 28
ENSG00000120129	DUSP1	dual specificity phosphatase 1	12.0852	11.1968	11.192	12.6508	11.1972	10.3105	12.0089	13.4199	12.2435	10.2947	10.2982	12.1495	12.9222	13.0634	13.2417	12.7913	11.5202	12.2694	0.749177	0.0289005	DUSP1	dual specificity phosphatase 1
ENSG00000251177	AC093829.1	---	0	2.75508	1.9203	0	3.71375	0	0	0	0	0	0	0	0	0	0	0	1.19845	0	-1.19845	0.0289037	AC093829.1	---
ENSG00000171408	PDE7B	phosphodiesterase 7B	7.73853	7.40025	6.97037	8.62825	7.6068	7.37338	6.63493	7.27384	7.63045	7.36808	6.65692	6.98866	6.50153	7.15987	6.51483	6.3464	7.47893	6.93784	-0.541089	0.0289231	PDE7B	phosphodiesterase 7B
ENSG00000164142	FAM160A1	family with sequence similarity 160 member A1	5.51707	4.51433	4.70406	4.75249	5.04239	3.87094	4.10576	5.21424	5.48943	4.454	5.18399	5.79699	5.09539	7.06609	5.17036	4.79647	4.64386	5.363	0.719133	0.0289294	FAM160A1	family with sequence similarity 160 member A1
ENSG00000262049	AC139530.1	---	6.71763	5.89867	6.00287	7.52027	4.59331	6.11175	4.96679	7.5765	7.50626	7.7509	6.00045	6.35489	7.31714	5.93074	7.46782	6.89046	5.97304	6.97724	1.0042	0.028985	AC139530.1	---
ENSG00000172728	FUT10	fucosyltransferase 10	8.02681	7.56704	6.75167	6.48551	6.82515	6.87629	7.1117	6.94559	6.7986	6.84549	7.25899	6.25925	5.77951	6.12928	6.28224	6.52123	7.09203	6.53557	-0.556451	0.0289955	FUT10	fucosyltransferase 10
ENSG00000132603	NIP7	NIP7, nucleolar pre-rRNA processing protein	8.40161	9.19017	9.18753	9.30169	9.18955	9.53049	9.35316	9.77374	9.4798	10.0842	8.92237	9.80161	9.6661	10.584	9.39657	8.83422	9.16489	9.61585	0.450966	0.0290359	NIP7	NIP7, nucleolar pre-rRNA processing protein
ENSG00000166881	NEMP1	nuclear envelope integral membrane protein 1	8.14359	9.08715	8.96171	8.48425	9.15928	8.95614	8.39297	7.67133	8.25459	8.57232	8.56358	8.35555	8.40025	6.79442	8.5145	8.5094	8.74073	8.18177	-0.558958	0.0290576	NEMP1	nuclear envelope integral membrane protein 1
ENSG00000270132	WISP1-OT1	WISP1 overlapping transcript 1	1.39443	1.10446	1.51434	0.922201	3.12318	2.23802	3.42361	5.35148	2.34653	1.62842	1.34316	4.31468	2.76719	2.58496	2.55154	4.67016	1.96003	3.06201	1.10198	0.0290603	WISP1-OT1	WISP1 overlapping transcript 1
ENSG00000099769	IGFALS	insulin like growth factor binding protein acid labile subunit	8.81559	9.73493	8.57248	7.59564	9.53421	8.19694	8.84021	7.95596	9.0832	10.4101	10.237	9.77937	9.15103	7.86419	9.60911	11.0591	8.75571	9.46101	0.705291	0.0291046	IGFALS	insulin like growth factor binding protein acid labile subunit
ENSG00000280255	AC004947.2	---	1.78378	0	2.49613	3.43896	0	0	1.66096	0	0	0	1.34316	0	0	0	0	0	1.33998	0.14924	-1.19074	0.0291441	AC004947.2	---
ENSG00000163121	NEURL3	neuralized E3 ubiquitin protein ligase 3	5.0694	3.88773	5.53881	4.65335	5.56311	4.99906	4.0122	4.21711	4.93657	4.64703	5.62695	5.11268	6.98996	6.12928	6.08967	6.44613	4.81767	5.57726	0.759596	0.029147	NEURL3	neuralized E3 ubiquitin protein ligase 3
ENSG00000197008	ZNF138	zinc finger protein 138	7.45358	5.78289	5.84872	7.49902	7.90089	7.075	6.93177	6.04081	6.09633	7.33108	6.90837	5.95185	5.56871	5.93074	6.15019	6.5751	6.92741	6.28368	-0.643724	0.0292733	ZNF138	zinc finger protein 138
ENSG00000140650	PMM2	phosphomannomutase 2	9.91115	9.61097	10.3326	10.3666	10.5073	10.8454	10.6594	11.3622	10.9885	11.5754	10.356	11.2816	10.9181	11.7711	10.4346	8.91303	10.3191	10.8445	0.525443	0.0293024	PMM2	phosphomannomutase 2
ENSG00000120907	ADRA1A	adrenoceptor alpha 1A	10.6906	11.2193	10.4232	8.11198	9.62358	10.6038	9.86731	7.36582	9.52651	8.76152	10.3518	9.19953	9.44695	7.34873	10.2078	9.75892	10.0771	9.1075	-0.969599	0.0293639	ADRA1A	adrenoceptor alpha 1A
ENSG00000128463	EMC4	ER membrane protein complex subunit 4	10.4506	10.4014	9.84121	10.1822	10.176	9.87696	10.2811	10.6352	10.4111	10.6562	10.0192	10.4486	10.3139	10.6321	10.3735	10.6047	10.1728	10.4549	0.282172	0.0294079	EMC4	ER membrane protein complex subunit 4
ENSG00000141664	ZCCHC2	zinc finger CCHC-type containing 2	10.3188	10.738	10.0665	9.72737	9.21919	9.64656	10.1153	10.1256	9.99789	9.46762	9.01957	9.81512	8.90607	9.28771	9.68436	8.9269	9.97595	9.47009	-0.505857	0.029434	ZCCHC2	zinc finger CCHC-type containing 2
ENSG00000125931	CITED1	Cbp/p300 interacting transactivator with Glu/Asp rich carboxy-terminal domain 1	0	2.15398	0	1.88167	0	0	2.08522	1.91789	2.34653	3.05677	2.6735	3.87281	2.11061	2.58496	0	2.16809	0.87441	2.30346	1.42905	0.0294349	CITED1	Cbp/p300 interacting transactivator with Glu/Asp rich carboxy-terminal domain 1
ENSG00000146733	PSPH	phosphoserine phosphatase	9.4905	8.79008	8.86737	6.39635	8.3969	8.9987	7.64334	8.36955	7.25931	7.40416	8.21376	8.47531	7.52638	6.89482	8.02065	8.03931	8.36903	7.80036	-0.568673	0.0295223	PSPH	phosphoserine phosphatase
ENSG00000183298	RPSAP19	ribosomal protein SA pseudogene 19	6.18328	6.22132	5.32158	6.68693	6.56466	5.25456	6.19842	6.13888	7.58512	7.51555	5.83549	6.37328	6.67555	6.87036	6.22712	7.01261	6.06154	6.69266	0.631129	0.0295556	RPSAP19	ribosomal protein SA pseudogene 19
ENSG00000132341	RAN	RAN, member RAS oncogene family	11.6523	11.509	11.4626	11.7272	12.1186	12.0115	11.8984	12.8417	12.0384	12.7839	11.5362	12.4021	12.4933	12.2354	11.5611	11.6686	11.7685	12.1734	0.404887	0.0296064	RAN	RAN, member RAS oncogene family
ENSG00000149182	ARFGAP2	ADP ribosylation factor GTPase activating protein 2	10.4539	10.055	9.92901	10.3695	10.4775	10.3899	10.1486	11.1703	10.2462	10.9039	10.725	10.7088	10.5333	10.7879	10.1083	10.1638	10.2605	10.5942	0.333669	0.0296167	ARFGAP2	ADP ribosylation factor GTPase activating protein 2
ENSG00000111215	PRR4	proline rich 4 (lacrimal)	3.6325	5.05333	4.48232	4.01926	4.99332	5.20695	3.80463	4.7009	6.18001	5.81842	5.21417	5.95185	5.12999	5.08746	4.48514	4.20722	4.45605	5.19724	0.741193	0.0296644	PRR4	proline rich 4 (lacrimal)
ENSG00000112992	NNT	nicotinamide nucleotide transhydrogenase	13.0623	13.1942	13.134	11.2799	12.6375	13.1233	12.6726	11.7455	11.3711	11.5475	13.091	12.7095	11.3344	11.8769	12.4424	12.4476	12.7291	12.0629	-0.666249	0.0297217	NNT	nicotinamide nucleotide transhydrogenase
ENSG00000181192	DHTKD1	dehydrogenase E1 and transketolase domain containing 1	12.5427	12.801	12.357	11.1899	11.7887	12.0729	11.8016	10.3784	11.431	11.3037	12.6569	11.6061	10.0562	11.4041	11.5467	11.5151	12.0791	11.322	-0.757116	0.0297432	DHTKD1	dehydrogenase E1 and transketolase domain containing 1
ENSG00000146425	DYNLT1	dynein light chain Tctex-type 1	10.3914	10.0965	10.1467	10.0569	10.1524	10.2339	10.0753	10.7366	10.2291	10.5823	10.1712	10.7999	10.4416	10.6909	10.1298	10.0933	10.1647	10.4305	0.265791	0.02975	DYNLT1	dynein light chain Tctex-type 1
ENSG00000121390	PSPC1	paraspeckle component 1	8.77593	8.85602	8.95633	9.67146	9.40652	9.10316	8.9765	9.17965	9.51245	10.0027	9.25009	9.51528	9.53025	9.50779	9.43964	9.24755	9.10656	9.46505	0.358489	0.0297591	PSPC1	paraspeckle component 1
ENSG00000270035	AL359881.2	---	1.78378	1.10446	0	2.45286	0	1.7984	0	0	0	0	0	0	0	0	0	0	1.01993	0	-1.01993	0.0297728	AL359881.2	---
ENSG00000268043	NBPF12	NBPF member 12	10.496	10.1588	9.11933	9.93684	9.22451	9.8996	9.08388	8.74144	9.5424	9.303	9.71334	9.07586	9.70964	8.36194	9.29749	9.18829	9.7027	9.21482	-0.487882	0.0297769	NBPF12	NBPF member 12
ENSG00000162385	MAGOH	mago homolog, exon junction complex core component	9.54184	9.87405	9.36659	9.44195	9.62559	9.36142	9.30712	9.95295	9.71189	10.4666	9.31593	9.79309	9.7794	10.0224	9.41313	9.98633	9.50265	9.82686	0.324203	0.0297825	MAGOH	mago homolog, exon junction complex core component
ENSG00000175305	CCNE2	cyclin E2	4.24164	5.05333	5.44969	4.5469	7.3485	6.68105	4.63139	4.89303	4.88763	5.06272	5.55802	3.76551	5.61829	4.58496	4.28377	2.77058	5.42179	4.60272	-0.819062	0.029813	CCNE2	cyclin E2
ENSG00000133863	TEX15	testis expressed 15, meiosis and synapsis associated	1.78378	4.51433	3.89967	4.30707	5.1803	4.54257	0	3.22282	0	2.63908	4.03304	0	0	0	1.96996	2.16809	3.4611	1.55922	-1.90188	0.0298274	TEX15	testis expressed 15, meiosis and synapsis associated
ENSG00000165092	ALDH1A1	aldehyde dehydrogenase 1 family member A1	13.9945	14.7129	12.9436	13.2484	13.5712	13.7818	12.7478	11.9177	13.2256	13.1437	13.6839	12.3847	11.7856	13.1035	13.2168	13.5279	13.5715	12.8877	-0.683758	0.029836	ALDH1A1	aldehyde dehydrogenase 1 family member A1
ENSG00000180867	PDIA3P1	protein disulfide isomerase family A member 3 pseudogene 1	9.37668	9.96651	9.24605	8.65733	9.89301	9.62635	9.77775	10.0532	9.75858	10.3547	9.50023	9.87765	10.3684	10.3287	9.71807	9.646	9.50624	9.95616	0.449918	0.0298429	PDIA3P1	protein disulfide isomerase family A member 3 pseudogene 1
ENSG00000119684	MLH3	mutL homolog 3	9.30419	9.02162	9.84121	9.01019	9.69244	9.5663	9.94532	9.04446	8.92847	8.8161	9.33494	9.7948	9.09959	8.47978	8.37355	9.21964	9.48304	9.01015	-0.47289	0.0298571	MLH3	mutL homolog 3
ENSG00000178662	CSRNP3	cysteine and serine rich nuclear protein 3	7.14869	6.4473	5.62275	6.30132	4.71934	6.30501	4.27644	4.41799	5.07417	4.38346	6.03468	0	3.21674	4.16993	5.60447	5.67482	5.83155	4.28625	-1.5453	0.0298697	CSRNP3	cysteine and serine rich nuclear protein 3
ENSG00000181381	DDX60L	DEAD-box helicase 60 like	8.86178	9.25135	8.86737	9.52492	9.84369	9.21568	9.53656	8.84678	8.81198	8.13593	9.48329	8.69224	9.0776	9.05528	9.02057	8.89196	9.30019	8.89063	-0.409565	0.0299495	DDX60L	DEAD-box helicase 60 like
ENSG00000070010	UFD1	ubiquitin recognition factor in ER associated degradation 1	10.6611	10.6079	9.98029	10.1598	10.3098	10.4268	10.0535	10.7529	11.0558	11.1823	9.67044	10.0731	10.8568	10.9944	10.7583	11.0353	10.3142	10.7088	0.394661	0.0299511	UFD1	ubiquitin recognition factor in ER associated degradation 1
ENSG00000145723	GIN1	gypsy retrotransposon integrase 1	7.76578	7.85197	7.63472	7.63514	7.33871	8.00151	7.83996	7.3739	7.15976	7.3497	7.76127	7.37371	7.65666	6.75489	7.2999	7.58512	7.72397	7.36832	-0.355646	0.0300108	GIN1	gypsy retrotransposon integrase 1
ENSG00000268388	FENDRR	FOXF1 adjacent non-coding developmental regulatory RNA	3.89193	5.40621	4.65174	5.27016	5.66061	4.46374	4.69299	4.14341	6.43973	6.01788	5.8926	5.79699	5.35137	5.16993	5.35309	5.9441	4.86248	5.56768	0.705194	0.0300406	FENDRR	FOXF1 adjacent non-coding developmental regulatory RNA
ENSG00000119650	IFT43	intraflagellar transport 43	8.66162	8.61493	8.54764	8.64125	9.38528	8.37442	9.68983	9.90218	8.649	9.66267	8.50069	10.215	9.92687	10.1396	8.69461	8.99106	8.845	9.40907	0.56407	0.0300643	IFT43	intraflagellar transport 43
ENSG00000139832	RAB20	RAB20, member RAS oncogene family	9.66129	9.45421	9.74927	9.95125	9.2351	9.71197	9.44553	10.554	9.72936	10.0391	9.20195	10.0829	10.4865	11.421	9.59285	9.32295	9.60123	10.0478	0.446609	0.0300717	RAB20	RAB20, member RAS oncogene family
ENSG00000114013	CD86	CD86 molecule	7.65355	8.09588	8.65786	8.55804	8.2739	8.24487	8.56757	6.57706	8.05294	6.87149	8.09308	7.70665	7.77615	8.44708	8.19356	7.20711	8.2931	7.65835	-0.634749	0.030093	CD86	CD86 molecule
ENSG00000270149	AL591806.3	---	0.859513	0	1.9203	1.48027	2.10621	1.7984	1.66096	4.28722	1.01543	2.37392	3.11858	1.63225	0.871594	4.90689	0.980041	1.11421	1.40367	2.25557	0.851906	0.030184	AL591806.3	---
ENSG00000135404	CD63	CD63 molecule	12.2585	12.5124	12.8285	12.9258	13.2416	12.862	13.1535	12.8052	13.1462	13.133	12.9338	13.2277	14.0685	13.4176	12.9972	13.4651	12.826	13.2438	0.417766	0.0302274	CD63	CD63 molecule
ENSG00000197746	PSAP	prosaposin	14.3813	14.3914	14.8084	14.5305	14.3135	14.4137	14.5644	14.0335	14.0321	14.0034	14.5775	14.4328	13.9787	14.2547	14.3165	13.4221	14.4862	14.1168	-0.369366	0.0302343	PSAP	prosaposin
ENSG00000144115	THNSL2	threonine synthase like 2	11.1838	10.6825	10.3347	8.70761	9.798	10.2676	10.0417	9.83061	8.70304	8.35452	7.19988	9.37404	10.179	9.65105	9.8802	10.2028	10.1451	9.2639	-0.881228	0.0302435	THNSL2	threonine synthase like 2
ENSG00000007312	CD79B	CD79b molecule	5.10398	6.22132	6.58031	8.64448	6.93316	7.02096	6.74081	5.69885	6.25911	6.2733	6.55448	5.92716	6.19343	6.06609	7.13999	5.80074	6.74929	6.21257	-0.536718	0.0302636	CD79B	CD79b molecule
ENSG00000163762	TM4SF18	transmembrane 4 L six family member 18	7.53819	9.39383	8.83254	10.6626	9.24823	9.96902	8.33135	6.89034	9.23031	9.65708	8.68708	8.89039	7.97002	6.78136	8.22203	7.94017	9.1394	8.25209	-0.887311	0.0303586	TM4SF18	transmembrane 4 L six family member 18
ENSG00000070018	LRP6	LDL receptor related protein 6	11.6744	11.41	11.8094	10.1855	11.6252	10.3833	11.9557	10.1516	10.409	11.0174	10.9155	11.0077	10.8767	10.722	11.3892	11.0631	11.2919	10.8391	-0.452786	0.030386	LRP6	LDL receptor related protein 6
ENSG00000196110	ZNF699	zinc finger protein 699	4.99766	4.89503	5.18098	6.58301	5.56311	5.85802	5.31907	4.5943	4.93657	4.81725	5.55802	5.35401	4.26701	5.2854	4.35406	2.99794	5.48527	4.68495	-0.80032	0.0304302	ZNF699	zinc finger protein 699
ENSG00000214860	EVPLL	envoplakin like	5.87834	5.58968	4.59745	0	2.92812	3.44802	5.15366	3.35928	2.02308	1.03271	2.2758	3.87281	3.21674	0	0	4.7347	3.94218	2.27946	-1.66272	0.0304427	EVPLL	envoplakin like
ENSG00000013523	ANGEL1	angel homolog 1	9.20813	8.91221	9.68727	9.2196	9.04957	9.46876	9.28729	8.93132	9.03626	8.69025	9.31245	8.90311	8.69412	8.31741	9.27728	9.02371	9.26183	8.90955	-0.352286	0.0304581	ANGEL1	angel homolog 1
ENSG00000261158	AC109597.2	---	0	0	0	0	0	0	0	2.49343	0	0	0	2.37849	1.80284	0	1.55829	2.77058	0	1.22262	1.22262	0.0304794	AC109597.2	---
ENSG00000134153	EMC7	ER membrane protein complex subunit 7	11.2083	10.8874	10.9262	10.6466	10.8412	10.8376	11.0156	11.2354	11.1168	11.1267	10.6295	11.188	11.3269	11.4126	11.0625	11.482	10.909	11.1756	0.266621	0.0305703	EMC7	ER membrane protein complex subunit 7
ENSG00000177192	PUS1	pseudouridylate synthase 1	8.41545	8.70516	7.85896	8.97212	8.64738	8.99169	7.68941	9.17503	8.95544	9.59014	8.05189	9.38314	9.01651	9.59059	8.61454	8.5988	8.4686	8.99734	0.528747	0.0305715	PUS1	pseudouridylate synthase 1
ENSG00000049860	HEXB	hexosaminidase subunit beta	11.8306	11.5747	11.726	11.4579	11.6237	11.68	11.5134	10.2678	11.2798	11.4211	11.4341	11.5169	11.1897	11.4435	11.3986	11.3992	11.6295	11.2612	-0.368287	0.0306292	HEXB	hexosaminidase subunit beta
ENSG00000164758	MED30	mediator complex subunit 30	7.32024	7.32979	7.46317	7.80643	7.10467	7.10128	7.39726	7.34131	7.57742	7.53195	7.17708	7.69207	8.21528	8.04985	7.89661	8.11399	7.3604	7.73284	0.372436	0.0306389	MED30	mediator complex subunit 30
ENSG00000120137	PANK3	pantothenate kinase 3	12.4076	11.9441	12.4358	10.5815	11.8784	13.4289	11.8877	11.4655	11.0384	11.4337	11.0617	11.763	11.895	11.6755	12.0319	12.0907	12.0806	11.6062	-0.474418	0.030663	PANK3	pantothenate kinase 3
ENSG00000118515	SGK1	serum/glucocorticoid regulated kinase 1	8.59633	10.6395	11.5465	10.6941	11.3129	10.9211	11.1886	11.9014	9.99645	12.42	10.915	12.6	12.2238	11.5901	11.4631	10.4257	10.6999	11.504	0.804072	0.0307368	SGK1	serum/glucocorticoid regulated kinase 1
ENSG00000007047	MARK4	microtubule affinity regulating kinase 4	8.72963	9.2649	9.43784	8.84592	9.3394	8.58925	9.34359	10.3794	9.08048	8.96544	9.48174	9.46687	9.33834	9.81057	9.51445	9.41444	9.07865	9.49463	0.415988	0.0307587	MARK4	microtubule affinity regulating kinase 4
ENSG00000173597	SULT1B1	sulfotransferase family 1B member 1	12.9106	11.7298	10.5176	9.81168	10.2832	12.4619	11.4157	10.8239	11.1804	9.20925	10.5084	11.0871	11.001	11.0231	10.7428	11.3245	11.3044	10.7667	-0.537618	0.0307666	SULT1B1	sulfotransferase family 1B member 1
ENSG00000173482	PTPRM	protein tyrosine phosphatase, receptor type M	10.7862	10.2785	10.5696	10.8831	10.2536	10.419	10.8181	10.3252	10.8316	9.93346	10.3894	9.86957	9.91452	10.1898	10.4426	9.9545	10.5726	10.2056	-0.366934	0.0308432	PTPRM	protein tyrosine phosphatase, receptor type M
ENSG00000275895	U2AF1L5	U2 small nuclear RNA auxiliary factor 1 like 5	9.46745	9.43036	9.35845	9.86527	9.72849	9.68833	9.42753	9.50981	10.0165	10.4783	9.40203	9.6905	10.095	10.4919	9.72969	9.74332	9.56655	9.90633	0.339778	0.030861	U2AF1L5	U2 small nuclear RNA auxiliary factor 1 like 5
ENSG00000263809	AC135178.2	---	0	0	3.60171	4.97408	4.99332	0	2.67935	1.51221	0	1.62842	2.6735	0	0	0	0	2.50056	2.32121	0.923854	-1.39736	0.0308664	AC135178.2	---
ENSG00000204569	PPP1R10	protein phosphatase 1 regulatory subunit 10	10.5106	10.6896	10.4806	9.74553	10.107	10.2978	10.6183	9.88674	9.55225	9.80272	10.5991	10.0661	10.3418	8.82972	9.76881	9.77435	10.3499	9.84685	-0.503064	0.0309628	PPP1R10	protein phosphatase 1 regulatory subunit 10
ENSG00000133935	ERG28	ergosterol biosynthesis 28 homolog	11.1968	10.2254	10.5222	9.21091	10.5807	12.886	9.34838	9.6158	9.47566	9.68301	10.7256	9.99065	10.2045	10.3242	9.90967	11.0345	10.5672	10.1071	-0.460137	0.0310093	ERG28	ergosterol biosynthesis 28 homolog
ENSG00000052802	MSMO1	methylsterol monooxygenase 1	13.7753	12.6957	13.5832	11.0391	13.1894	15.9787	10.8319	12.7731	11.5454	11.6972	12.2271	11.3724	12.4139	14.0965	11.8839	13.6347	13.0133	12.4049	-0.608422	0.0310369	MSMO1	methylsterol monooxygenase 1
ENSG00000283914	AC087645.4	---	0	0	0	0	0	0	0	1.91789	0	0	3.24091	2.05309	1.80284	1.58496	0	0	0	1.17774	1.17774	0.0310711	AC087645.4	---
ENSG00000068615	REEP1	receptor accessory protein 1	4.30245	5.40621	7.17885	7.44816	5.59635	6.13737	5.35762	3.80397	5.35186	5.06272	6.65692	3.97267	4.69435	3	5.86737	4.8557	5.91814	4.80729	-1.11086	0.0310999	REEP1	receptor accessory protein 1
ENSG00000088926	F11	coagulation factor XI	13.1858	13.2736	13.6599	10.818	11.4073	12.9051	12.3168	11.3417	11.0029	11.6101	12.8412	12.4069	11.2286	12.27	11.9998	12.3282	12.5095	11.8922	-0.617342	0.0311368	F11	coagulation factor XI
ENSG00000075711	DLG1	discs large MAGUK scaffold protein 1	11.1726	11.0574	10.9696	10.2913	10.3529	10.9647	10.6937	10.5795	10.5365	10.5014	10.5489	10.5359	10.2307	9.96	10.8006	10.5053	10.786	10.4665	-0.319508	0.031155	DLG1	discs large MAGUK scaffold protein 1
ENSG00000233966	UBE2SP1	ubiquitin conjugating enzyme E2 S pseudogene 1	3.05829	3.64406	2.71591	3.02857	2.92812	3.87094	3.27039	5.5065	3.61312	3.76027	2.2758	4.31468	3.65713	4.32193	4.20987	3.66079	3.21661	3.92445	0.707843	0.0312655	UBE2SP1	ubiquitin conjugating enzyme E2 S pseudogene 1
ENSG00000266651	AC093484.5	---	2.55742	2.15398	0	0	1.67975	2.57451	0	1.91789	3.19724	2.86299	1.34316	3.06176	3.21674	3.45943	2.28986	2.99794	1.28081	2.70522	1.42441	0.0312875	AC093484.5	---
ENSG00000274272	AC069281.2	---	7.68815	7.0829	6.23395	7.94387	6.95895	6.43467	6.28097	7.475	5.58464	5.70729	6.06811	5.15581	6.72165	6.44294	6.54519	6.04934	6.94621	6.19444	-0.751767	0.0313191	AC069281.2	---
ENSG00000106263	EIF3B	eukaryotic translation initiation factor 3 subunit B	11.3351	11.3867	11.7677	11.2425	11.5354	11.5483	11.3816	12.4123	11.9492	12.46	11.2235	12.1374	11.6721	12.4049	11.4157	10.9384	11.4568	11.8459	0.389175	0.0313284	EIF3B	eukaryotic translation initiation factor 3 subunit B
ENSG00000258136	AC007622.2	---	2.09008	0	0	1.48027	0	0	0	2.71312	2.02308	2.0488	0	2.86788	3.08188	2.32193	2.77297	0	0.510049	1.98107	1.47102	0.0314368	AC007622.2	---
ENSG00000133316	WDR74	WD repeat domain 74	8.71851	8.83801	8.71634	8.69831	8.65528	8.78432	8.57167	9.24717	8.84441	9.11171	8.18738	8.95286	9.07316	9.73132	8.96551	9.13848	8.71178	9.028	0.316221	0.03145	WDR74	WD repeat domain 74
ENSG00000160856	FCRL3	Fc receptor like 3	3.5345	2.98205	4.59745	8.02542	3.44848	3.87094	4.27644	3.48395	5.15911	3.86753	4.84133	3.64959	4.98633	5	6.30016	4.20722	4.39075	4.61058	0.219826	0.0314671	FCRL3	Fc receptor like 3
ENSG00000128534	LSM8	LSM8 homolog, U6 small nuclear RNA associated	8.28967	8.23456	7.99117	9.4768	9.13404	8.5985	8.71218	9.04193	9.33671	9.27649	8.4791	8.91257	9.63783	9.57365	9.00154	9.17673	8.63385	9.15961	0.525768	0.0314751	LSM8	LSM8 homolog, U6 small nuclear RNA associated
ENSG00000086848	ALG9	ALG9, alpha-1,2-mannosyltransferase	9.20017	8.72882	9.04013	8.83465	9.39948	9.02295	9.35077	9.64613	9.50436	9.74586	9.16186	9.36028	9.35123	9.50184	9.19109	9.00093	9.08242	9.38484	0.302418	0.0315659	ALG9	ALG9, alpha-1,2-mannosyltransferase
ENSG00000261375	AC135983.4	---	0	0	0	0	0	0	0	0	4.3511	1.62842	0	2.05309	0	2	1.55829	0	0	1.28788	1.28788	0.0316052	AC135983.4	---
ENSG00000220793	AC087190.1	---	8.18859	8.4539	8.26375	9.04727	8.57419	8.36902	8.37898	8.80854	9.31605	9.5444	8.17593	8.5296	8.99556	9.52552	8.77688	8.29609	8.46796	8.8854	0.417437	0.0316088	AC087190.1	---
ENSG00000141580	WDR45B	WD repeat domain 45B	10.6139	10.8137	11.0508	10.7559	11.0126	10.896	10.972	10.9849	11.2474	11.6019	10.614	11.2706	11.2301	11.3264	11.1247	10.9238	10.8736	11.1471	0.273547	0.0316128	WDR45B	WD repeat domain 45B
ENSG00000218510	LINC00339	long intergenic non-protein coding RNA 339	7.34935	7.55826	6.19792	7.07949	7.13891	6.25907	7.39726	6.41425	6.87592	7.0067	6.54263	6.49583	6.1435	4.90689	6.84279	6.07449	6.99718	6.367	-0.630177	0.0316555	LINC00339	long intergenic non-protein coding RNA 339
ENSG00000178381	ZFAND2A	zinc finger AN1-type containing 2A	9.61109	9.90207	8.61067	8.79741	9.41586	9.24838	8.69723	9.37744	9.89948	9.60572	9.23176	9.30147	9.51233	11.5736	9.01245	10.1798	9.18324	9.74379	0.560549	0.0317595	ZFAND2A	zinc finger AN1-type containing 2A
ENSG00000178175	ZNF366	zinc finger protein 366	5.46482	6.34895	5.59531	7.21602	6.59786	5.82687	6.065	4.41799	6.47329	6.01788	4.16251	6.31739	3.74903	4.45943	5.45256	4.20722	6.15926	5.02859	-1.13067	0.0318276	ZNF366	zinc finger protein 366
ENSG00000110324	IL10RA	interleukin 10 receptor subunit alpha	6.90576	9.23216	9.90267	10.9068	8.46596	8.78837	9.42753	7.15698	9.23276	8.01281	9.26278	8.83176	8.50939	7.97154	9.15463	6.04934	9.08989	8.24244	-0.847451	0.0318475	IL10RA	interleukin 10 receptor subunit alpha
ENSG00000128283	CDC42EP1	CDC42 effector protein 1	9.86275	10.3641	10.6937	9.54925	9.93584	9.45099	10.6083	11.1398	10.2845	10.6571	9.83608	11.2816	10.5645	11.0661	10.1862	10.2546	10.0664	10.5856	0.519201	0.031848	CDC42EP1	CDC42 effector protein 1
ENSG00000100206	DMC1	DNA meiotic recombinase 1	1.78378	2.15398	1.9203	3.3147	4.21955	3.60318	0	0	0	2.0488	2.02649	0	2.76719	0	0	0	2.42793	0.760275	-1.66765	0.0318704	DMC1	DNA meiotic recombinase 1
ENSG00000258643	BCL2L2-PABPN1	BCL2L2-PABPN1 readthrough	4.92217	4.09613	3.98673	0.922201	2.10621	1.7984	4.19363	2.90374	6.56952	6.75059	0	4.06607	6.63999	4.64386	4.28377	3.3671	3.1465	4.35829	1.2118	0.0318712	BCL2L2-PABPN1	BCL2L2-PABPN1 readthrough
ENSG00000144362	PHOSPHO2	phosphatase, orphan 2	6.3795	6.03144	5.93881	5.77348	5.30616	5.69504	6.30089	5.31838	5.52187	5.61795	5.46067	5.71285	5.51737	4.70044	5.96044	5.21364	5.9179	5.44707	-0.470835	0.0319641	PHOSPHO2	phosphatase, orphan 2
ENSG00000271889	AC016747.2	---	2.55742	1.72262	2.23676	2.86097	1.07167	1.7984	3.09895	0	0	0	0	1.63225	0	0	2.55154	1.73532	2.1924	0.657679	-1.53472	0.0319979	AC016747.2	---
ENSG00000162981	FAM84A	family with sequence similarity 84 member A	4.80095	7.64372	8.73532	8.88741	6.83911	6.23554	6.74081	6.02037	7.23994	6.29268	6.17939	7.45366	5.9634	4.90689	7.58937	6.04934	7.12612	6.41056	-0.715564	0.0320277	FAM84A	family with sequence similarity 84 member A
ENSG00000271781	AC026740.1	---	1.39443	2.15398	2.49613	2.86097	2.10621	0	1.66096	3.80397	2.34653	2.37392	3.24091	2.37849	3.08188	3.45943	2.28986	2.99794	1.81038	2.88588	1.0755	0.0321217	AC026740.1	---
ENSG00000107951	MTPAP	mitochondrial poly(A) polymerase	8.72408	8.89837	8.69064	8.85988	8.86415	9.01606	8.78824	9.19112	8.9315	9.07301	8.81814	9.0926	9.10177	9.79116	9.01787	8.94065	8.83449	9.10642	0.271935	0.0321365	MTPAP	mitochondrial poly(A) polymerase
ENSG00000114737	CISH	cytokine inducible SH2 containing protein	8.88682	9.81448	9.7289	8.95401	8.64738	10.6535	8.88048	8.95035	10.1702	9.60184	9.52903	10.2601	10.6973	10.6312	10.071	10.9436	9.3665	10.095	0.728449	0.0321407	CISH	cytokine inducible SH2 containing protein
ENSG00000269815	AC010463.3	---	1.78378	2.75508	0	1.48027	0	0	2.08522	3.07208	3.02689	2.37392	1.72491	3.64959	2.36413	2.80735	2.55154	1.11421	1.15776	2.52052	1.36275	0.0321478	AC010463.3	---
ENSG00000087191	PSMC5	proteasome 26S subunit, ATPase 5	11.0643	10.9583	10.777	11.0519	11.021	10.9983	10.8404	10.9332	11.5655	11.555	10.9406	11.2016	11.07	11.1997	10.9364	11.5548	10.9587	11.2174	0.258674	0.0321616	PSMC5	proteasome 26S subunit, ATPase 5
ENSG00000146386	ABRACL	ABRA C-terminal like	11.5697	9.77904	9.61396	9.585	9.49068	10.4728	8.47416	9.02151	9.32527	8.06446	9.09855	8.83176	9.33093	9.59059	8.63938	10.6186	9.85504	9.16901	-0.686036	0.032186	ABRACL	ABRA C-terminal like
ENSG00000137193	PIM1	Pim-1 proto-oncogene, serine/threonine kinase	9.01725	10.0377	10.8857	9.70897	10.4963	10.4791	9.70299	10.3541	9.32756	10.4857	10.0686	11.1945	12.1022	12.1494	10.7321	9.59259	10.0469	10.6674	0.620557	0.0321864	PIM1	Pim-1 proto-oncogene, serine/threonine kinase
ENSG00000144834	TAGLN3	transgelin 3	2.09008	0	3.48694	2.19535	0	0	0	0	0	0	0	0	0	0	4.66181	0	1.11034	0.517979	-0.59236	0.0322054	TAGLN3	transgelin 3
ENSG00000143947	RPS27A	ribosomal protein S27a	12.7636	12.9105	12.6128	13.5687	13.2064	12.7006	12.9921	13.0948	13.923	13.9691	12.659	13.2219	13.6132	13.7347	13.3252	13.0093	12.9649	13.3945	0.429514	0.0322714	RPS27A	ribosomal protein S27a
ENSG00000229065	AL354893.2	---	0	0	1.9203	2.6713	0	3.44802	0	0	0	0	0	0	0	0	0	0	1.14852	0	-1.14852	0.0322758	AL354893.2	---
ENSG00000130725	UBE2M	ubiquitin conjugating enzyme E2 M	9.46079	9.27297	9.10237	9.11404	9.1141	9.29181	8.95466	10.199	9.26666	9.51582	8.81568	9.43659	9.69527	9.97154	9.28405	9.49815	9.18725	9.52031	0.333059	0.0322831	UBE2M	ubiquitin conjugating enzyme E2 M
ENSG00000156931	VPS8	VPS8, CORVET complex subunit	9.2259	9.28632	9.78463	8.86266	9.40418	9.05692	9.45668	8.87551	8.77546	8.42206	9.39546	9.51321	8.80532	8.43045	8.9627	8.78555	9.29675	8.88508	-0.411673	0.0322958	VPS8	VPS8, CORVET complex subunit
ENSG00000104361	NIPAL2	NIPA like domain containing 2	8.31572	8.65665	8.77255	8.72907	8.94055	9.12253	9.07812	8.67761	9.25464	9.01002	9.32978	9.35797	9.34204	8.69349	9.05527	9.48414	8.80217	9.13389	0.331716	0.0323423	NIPAL2	NIPA like domain containing 2
ENSG00000267560	AC027514.2	---	0	0	0	0	0	0	0	1.91789	1.6055	0	0	2.37849	2.36413	0	0	2.50056	0	1.19629	1.19629	0.0324039	AC027514.2	---
ENSG00000182700	IGIP	IgA inducing protein	9.52759	9.2294	9.00146	7.4031	8.50149	8.34173	8.60009	8.18902	7.03046	7.3497	7.88838	7.92182	8.40025	6.64386	8.47561	9.14443	8.65784	7.89372	-0.764112	0.0324208	IGIP	IgA inducing protein
ENSG00000160199	PKNOX1	PBX/knotted 1 homeobox 1	8.23222	9.0438	8.62091	8.27508	8.70565	8.72641	8.53008	8.30763	6.7169	8.29331	8.24699	8.73198	8.28601	7.91289	8.22203	7.05113	8.59059	7.97432	-0.616275	0.0324462	PKNOX1	PBX/knotted 1 homeobox 1
ENSG00000205571	SMN2	survival of motor neuron 2, centromeric	9.12219	9.19867	8.41659	9.59838	8.76166	8.37442	9.16491	9.47079	8.80541	10.1706	8.4853	9.66274	10.0685	10.2467	8.60015	9.66268	8.94812	9.46365	0.515532	0.0324716	SMN2	survival of motor neuron 2, centromeric
ENSG00000125871	MGME1	mitochondrial genome maintenance exonuclease 1	8.74614	8.46803	8.78171	8.74119	8.90119	8.89736	7.57954	7.45229	8.28326	8.57232	8.25063	8.44954	8.43179	8.03892	7.55993	8.33304	8.58788	8.15241	-0.435467	0.0324855	MGME1	mitochondrial genome maintenance exonuclease 1
ENSG00000219133	AL592114.1	---	4.41688	5.14996	3.89967	5.20164	4.99332	4.61731	4.80882	5.38385	5.64478	6.2733	4.91668	5.31649	5.09539	5.64386	5.13086	4.45718	4.7268	5.31804	0.591242	0.0325052	AL592114.1	---
ENSG00000215859	PDZK1P1	PDZ domain containing 1 pseudogene 1	0	6.1056	1.9203	2.45286	4.03792	4.99906	2.90435	3.48395	2.34653	2.86299	0	2.86788	3.45368	2.32193	0	2.77058	3.20287	2.23417	-0.968702	0.0325619	PDZK1P1	PDZ domain containing 1 pseudogene 1
ENSG00000163755	HPS3	HPS3, biogenesis of lysosomal organelles complex 2 subunit 1	10.3587	9.72712	10.0814	11.2892	10.4356	10.2633	9.75085	9.55136	8.60047	8.38643	9.71202	8.47956	10.1081	9.70217	9.92274	10.7793	10.2723	9.47134	-0.800964	0.0325725	HPS3	HPS3, biogenesis of lysosomal organelles complex 2 subunit 1
ENSG00000225973	PIGBOS1	PIGB opposite strand 1	7.21345	5.55481	6.99157	7.38777	7.71668	6.66352	6.74081	7.10938	7.89475	7.76484	6.75256	7.35533	7.72615	8.13443	7.59663	7.51335	6.89552	7.5386	0.643086	0.0325982	PIGBOS1	PIGB opposite strand 1
ENSG00000158402	CDC25C	cell division cycle 25C	0	2.15398	1.9203	2.45286	5.62884	4.61731	0	0	0	0	3.24091	0	1.80284	2	0	0	2.39618	0.782638	-1.61355	0.0326277	CDC25C	cell division cycle 25C
ENSG00000155438	NIFK	nucleolar protein interacting with the FHA domain of MKI67	8.71292	9.27832	9.32334	9.5354	9.82103	9.77862	9.60425	10.446	9.81366	10.1784	9.16573	9.85165	10.3656	11.0147	9.30638	9.04613	9.43627	9.90981	0.473543	0.0326481	NIFK	nucleolar protein interacting with the FHA domain of MKI67
ENSG00000152133	GPATCH11	G-patch domain containing 11	9.03975	9.5657	9.19897	9.0858	9.01311	8.85938	8.9132	8.51909	8.83476	9.00415	8.84491	9.14972	8.17028	9.13699	8.33496	8.26365	9.09656	8.69539	-0.401167	0.032719	GPATCH11	G-patch domain containing 11
ENSG00000198077	CYP2A7	cytochrome P450 family 2 subfamily A member 7	8.08422	10.2254	5.2877	8.34028	4.99332	8.45814	5.10916	7.26518	8.25941	7.17277	5.51017	6.65461	4.13699	4.39232	6.84279	4.01274	7.21404	6.02744	-1.18659	0.0327255	CYP2A7	cytochrome P450 family 2 subfamily A member 7
ENSG00000141179	PCTP	phosphatidylcholine transfer protein	12.3001	11.3024	10.5047	9.87493	10.7692	11.1294	10.9182	10.349	10.718	10.7934	10.8606	10.5349	9.92318	10.5565	10.5192	10.784	10.9713	10.5599	-0.411426	0.0327417	PCTP	phosphatidylcholine transfer protein
ENSG00000197782	ZNF780A	zinc finger protein 780A	8.72963	8.81976	8.49664	8.49144	9.05555	8.54207	8.79528	8.52273	8.40564	8.24936	8.57525	8.33224	8.33131	7.93074	8.54111	8.79693	8.70434	8.40948	-0.294859	0.0327491	ZNF780A	zinc finger protein 780A
ENSG00000282246	AL157392.5	---	1.39443	0	0.947361	0	0	0	0	3.80397	0	2.86299	1.72491	0	1.41108	0	3.13425	1.11421	0.334542	1.56127	1.22673	0.0328006	AL157392.5	---
ENSG00000198478	SH3BGRL2	SH3 domain binding glutamate rich protein like 2	12.0871	11.5817	11.5722	10.6895	11.0706	10.5174	11.1535	9.45945	10.5737	10.807	10.7972	10.2465	11.0938	10.3826	11.4223	11.1698	11.2389	10.6614	-0.577488	0.0328165	SH3BGRL2	SH3 domain binding glutamate rich protein like 2
ENSG00000255571	MIR9-3HG	MIR9-3 host gene	0	1.72262	2.49613	5.86494	2.10621	2.23802	2.08522	3.70498	3.48736	3.05677	2.98492	3.06176	2.36413	3	3.96235	0	2.35902	2.84692	0.487897	0.0328204	MIR9-3HG	MIR9-3 host gene
ENSG00000128928	IVD	isovaleryl-CoA dehydrogenase	12.7289	12.442	12.437	11.3374	11.7375	12.6483	11.7203	11.5769	11.3694	12.0405	12.2639	12.0544	10.9828	11.9076	11.4401	11.5408	12.1502	11.6863	-0.463926	0.032838	IVD	isovaleryl-CoA dehydrogenase
ENSG00000081386	ZNF510	zinc finger protein 510	8.56565	8.73662	8.99359	8.31212	8.28414	8.33067	8.05462	8.21623	7.81191	7.92862	8.4853	8.48802	7.72048	7.74819	8.46374	7.85563	8.4682	8.07979	-0.388409	0.0328694	ZNF510	zinc finger protein 510
ENSG00000197771	MCMBP	minichromosome maintenance complex binding protein	10.1398	10.5449	10.7593	10.7227	10.6935	10.6243	10.7849	11.4641	10.9428	11.4343	10.8647	11.1578	10.663	11.6234	10.7371	9.97301	10.6099	10.9845	0.37456	0.032932	MCMBP	minichromosome maintenance complex binding protein
ENSG00000157613	CREB3L1	cAMP responsive element binding protein 3 like 1	5.203	3.99569	5.10519	6.12754	5.62884	5.43068	4.69299	5.2498	5.31532	5.31096	6.55448	3.76551	7.26362	7.78136	5.51526	6.07449	5.16913	5.87009	0.700957	0.0329527	CREB3L1	cAMP responsive element binding protein 3 like 1
ENSG00000101096	NFATC2	nuclear factor of activated T-cells 2	8.35572	8.26724	9.08274	9.46954	8.50587	8.75566	8.27708	7.42922	8.30206	7.6418	8.32167	8.48379	8.12383	6.62936	8.83333	8.50015	8.67341	8.02947	-0.643939	0.033017	NFATC2	nuclear factor of activated T-cells 2
ENSG00000130204	TOMM40	translocase of outer mitochondrial membrane 40	9.72098	9.7922	9.46463	9.2411	9.51913	9.79481	9.5047	11.541	9.77212	10.3707	9.37724	10.0055	9.85373	10.633	9.01516	9.55063	9.57679	10.0132	0.436434	0.0330232	TOMM40	translocase of outer mitochondrial membrane 40
ENSG00000163811	WDR43	WD repeat domain 43	9.47076	9.82	9.80424	9.95516	10.0955	10.2676	10.052	10.5352	10.4962	10.9465	9.71729	10.5919	10.295	11.2438	10.0246	9.20547	9.92361	10.3396	0.415941	0.0330415	WDR43	WD repeat domain 43
ENSG00000251409	AC008592.4	---	3.42936	2.98205	0	0.922201	0	0	0	3.80397	4.42156	2.37392	2.02649	2.05309	2.57969	4.08746	3.2858	2.99794	1.04766	3.06999	2.02233	0.0330432	AC008592.4	---
ENSG00000229005	HNF4A-AS1	HNF4A antisense RNA 1	9.06849	8.13773	6.32029	4.09677	4.71934	6.861	3.09895	2.49343	5.52187	3.51837	7.10642	3.97267	0	2.58496	5.24625	6.19407	6.04322	4.07089	-1.97233	0.033062	HNF4A-AS1	HNF4A antisense RNA 1
ENSG00000183020	AP2A2	adaptor related protein complex 2 alpha 2 subunit	10.7264	10.91	10.9494	10.7715	10.4368	11.0388	10.806	10.7911	10.0968	10.4941	10.579	10.9415	10.5684	10.3432	10.2066	10.5225	10.8056	10.5048	-0.300766	0.0331489	AP2A2	adaptor related protein complex 2 alpha 2 subunit
ENSG00000253919	THAP12P7	THAP domain containing 12 pseudogene 7	2.74437	3.64406	4.42112	3.7581	3.5872	4.82078	4.0122	4.28722	4.61439	5.27245	4.6337	4.71147	4.20346	5.16993	4.13199	4.37858	3.85541	4.60035	0.744949	0.0331549	THAP12P7	THAP domain containing 12 pseudogene 7
ENSG00000229036	VDAC1P8	voltage dependent anion channel 1 pseudogene 8	4.47087	5.14996	4.8962	4.9324	5.04239	5.10675	5.56952	5.31838	6.64509	5.58689	5.38309	4.65247	5.51737	5.58496	5.51526	5.73915	5.02401	5.54918	0.525172	0.0331674	VDAC1P8	voltage dependent anion channel 1 pseudogene 8
ENSG00000258924	AC002094.1	---	0	0	2.90658	3.3147	1.67975	0	0	0	0	0	0	0	0	0	0	0	1.12872	0	-1.12872	0.0331768	AC002094.1	---
ENSG00000270983	AL589674.2	---	3.05829	2.98205	3.07497	2.6713	3.12318	3.60318	2.90435	4.93732	3.83588	4.14844	3.11858	2.64384	3.74903	4.58496	3.13425	3.3671	3.05962	3.72438	0.66476	0.0331792	AL589674.2	---
ENSG00000108176	DNAJC12	DnaJ heat shock protein family (Hsp40) member C12	9.79029	9.50077	10.1035	8.97982	10.6829	10.1841	10.0954	8.16128	10.4176	10.599	9.31419	11.2986	11.9801	10.2384	10.6163	11.5917	9.90525	10.4686	0.563316	0.0331808	DNAJC12	DnaJ heat shock protein family (Hsp40) member C12
ENSG00000108829	LRRC59	leucine rich repeat containing 59	11.4442	11.677	11.4904	11.796	12.0389	11.9764	11.9311	12.3015	12.0321	13.1294	10.9878	12.6359	12.321	12.9633	11.6145	11.7774	11.7648	12.1959	0.43103	0.0332334	LRRC59	leucine rich repeat containing 59
ENSG00000158104	HPD	4-hydroxyphenylpyruvate dioxygenase	15.342	16.0829	14.1852	13.5848	13.2683	14.1182	15.028	12.4252	13.463	14.0489	14.3864	14.2495	13.5776	15.0214	12.9925	13.9366	14.5156	13.789	-0.72661	0.0332624	HPD	4-hydroxyphenylpyruvate dioxygenase
ENSG00000179833	SERTAD2	SERTA domain containing 2	10.7166	10.6026	9.86438	9.28936	8.93407	9.3505	8.77406	8.7845	9.13916	8.3499	9.08228	7.79796	8.386	8.90087	9.06579	10.4678	9.64737	8.88603	-0.761343	0.0332648	SERTAD2	SERTA domain containing 2
ENSG00000126001	CEP250	centrosomal protein 250	8.45281	8.54557	8.84715	9.09999	8.57419	8.52761	8.46094	8.3244	8.43148	8.1989	8.79336	8.61321	7.98899	8.12928	8.20311	8.28536	8.64404	8.32979	-0.314247	0.0333427	CEP250	centrosomal protein 250
ENSG00000107897	ACBD5	acyl-CoA binding domain containing 5	11.2899	11.4294	11.5954	10.2684	10.9537	11.2407	10.4667	9.99546	10.2535	10.807	10.931	10.3798	10.0163	9.93074	11.2207	11.0599	11.0349	10.5105	-0.5244	0.033359	ACBD5	acyl-CoA binding domain containing 5
ENSG00000280184	AL023806.3	---	2.34259	2.15398	7.43249	2.6713	0	0	2.67935	2.49343	2.61058	3.64438	2.6735	2.05309	3.55899	3.32193	3.96235	2.99794	2.46853	3.03513	0.566603	0.0333883	AL023806.3	---
ENSG00000279861	AC073548.1	---	4.92217	5.00247	3.22575	3.43896	4.03792	4.68837	5.43177	6.08084	5.35186	4.58551	4.76183	4.97497	5.75755	5.42626	4.66181	5.60748	4.39249	5.24535	0.85286	0.0334033	AC073548.1	---
ENSG00000231234	SKP1P1	S-phase kinase associated protein 1 pseudogene 1	4.04213	4.58518	3.07497	3.55337	5.52909	3.74326	3.5621	4.5943	4.11637	5.34848	5.77604	5.82398	5.35137	4.90689	4.86805	3.66079	4.01287	4.93847	0.925604	0.0334232	SKP1P1	S-phase kinase associated protein 1 pseudogene 1
ENSG00000145920	CPLX2	complexin 2	4.04213	4.51433	3.80702	4.01926	4.6577	0	2.41266	3.22282	0	0	0	2.05309	2.11061	3.16993	6.94881	3.1943	3.35044	2.29995	-1.05049	0.0334296	CPLX2	complexin 2
ENSG00000186594	MIR22HG	MIR22 host gene	8.31572	7.94244	9.38273	9.81741	8.23222	8.30263	6.75532	9.27978	9.27143	9.77026	8.60118	9.13093	9.8576	9.9629	8.49129	9.4935	8.39264	9.31765	0.925014	0.0334612	MIR22HG	MIR22 host gene
ENSG00000272555	AC009974.1	---	4.62166	5.48242	5.35469	5.01458	5.52909	4.99906	6.39656	2.49343	5.15911	3.76027	4.67768	3.97267	4.90876	2	4.91531	5.50019	5.34258	4.15416	-1.18842	0.0335118	AC009974.1	---
ENSG00000100650	SRSF5	serine and arginine rich splicing factor 5	10.2276	10.7272	11.0201	11.6111	11.075	10.3521	10.5943	10.4383	11.4543	11.4645	11.138	10.8599	11.3204	11.9516	11.343	11.7362	10.8011	11.3007	0.499607	0.0335125	SRSF5	serine and arginine rich splicing factor 5
ENSG00000184216	IRAK1	interleukin 1 receptor associated kinase 1	10.8416	10.4743	10.6317	10.3985	10.9039	10.4639	10.9438	11.7548	11.8956	11.8036	10.5526	11.1518	10.915	11.4099	10.4223	9.90102	10.6654	11.0896	0.424239	0.033541	IRAK1	interleukin 1 receptor associated kinase 1
ENSG00000178821	TMEM52	transmembrane protein 52	7.72749	6.53938	6.46376	4.60111	5.13578	5.76246	3.91215	5.2498	5.23933	4.454	5.32895	5.52824	4.78397	3.16993	5.17036	6.23926	5.73459	5.0182	-0.716384	0.0335924	TMEM52	transmembrane protein 52
ENSG00000185518	SV2B	synaptic vesicle glycoprotein 2B	6.01179	4.94975	2.49613	5.23631	5.66061	7.99452	4.19363	4.5943	5.3875	3.38029	5.15316	5.39058	4.69435	3.80735	5.60447	2.16809	5.22039	4.46446	-0.755936	0.0336416	SV2B	synaptic vesicle glycoprotein 2B
ENSG00000239884	RN7SL608P	RNA, 7SL, cytoplasmic 608, pseudogene	4.24164	1.72262	1.51434	0.922201	1.07167	2.84716	1.66096	1.51221	1.01543	0	1.72491	1.03561	1.41108	2	0.980041	1.11421	1.99723	1.19928	-0.797951	0.0336505	RN7SL608P	RNA, 7SL, cytoplasmic 608, pseudogene
ENSG00000077420	APBB1IP	amyloid beta precursor protein binding family B member 1 interacting protein	10.4903	11.0958	11.3781	10.5958	10.0838	11.7501	10.6795	10.5795	9.90718	9.48878	11.0628	10.5018	10.6593	9.51373	10.5429	10.6025	10.8676	10.3176	-0.550022	0.0336722	APBB1IP	amyloid beta precursor protein binding family B member 1 interacting protein
ENSG00000164039	BDH2	3-hydroxybutyrate dehydrogenase 2	11.9928	10.9186	11.2164	9.84295	9.56182	10.9082	9.88391	8.88119	10.4569	8.712	10.0758	8.73198	8.31637	8.73471	10.9198	11.1477	10.6178	9.55295	-1.06485	0.0336754	BDH2	3-hydroxybutyrate dehydrogenase 2
ENSG00000111186	WNT5B	Wnt family member 5B	5.66334	5.28377	3.70802	5.45813	3.12318	3.98823	4.42905	0	3.72879	3.51837	4.03304	3.06176	1.41108	3	4.66181	4.6026	4.52196	3.11305	-1.40891	0.0336947	WNT5B	Wnt family member 5B
ENSG00000261461	UBE2MP1	ubiquitin conjugating enzyme E2 M pseudogene 1	2.34259	0	0	0	1.67975	2.57451	2.67935	2.90374	3.02689	3.51837	3.35366	2.05309	2.36413	3	2.28986	2.16809	1.32517	2.74198	1.41681	0.0337352	UBE2MP1	ubiquitin conjugating enzyme E2 M pseudogene 1
ENSG00000100987	VSX1	visual system homeobox 1	0	0	0	2.45286	2.10621	0	3.09895	3.07208	3.61312	0	3.64709	3.52354	4.20346	4.70044	2.96489	0	1.094	2.85829	1.76429	0.0337624	VSX1	visual system homeobox 1
ENSG00000168806	LCMT2	leucine carboxyl methyltransferase 2	7.61211	7.96918	7.90439	7.49186	7.72422	8.28555	7.90648	8.48965	8.01357	7.95318	7.86479	8.51311	8.5322	8.75822	7.58937	8.16757	7.84197	8.20907	0.367105	0.0337814	LCMT2	leucine carboxyl methyltransferase 2
ENSG00000156531	PHF6	PHD finger protein 6	9.19014	8.94625	8.64787	8.50927	8.97571	8.96332	9.07812	9.09909	8.67808	8.23941	8.83766	8.60156	8.41084	7.91289	8.44776	8.55032	8.90152	8.53084	-0.370681	0.0337856	PHF6	PHD finger protein 6
ENSG00000198625	MDM4	MDM4, p53 regulator	8.21255	6.24339	7.4169	6.39635	8.40161	6.39273	9.33637	7.88425	9.29039	7.64934	8.76306	8.574	8.82921	8.17991	9.10708	9.71561	7.4857	8.66587	1.18017	0.0338119	MDM4	MDM4, p53 regulator
ENSG00000233376	AL117382.2	---	4.11174	3.50482	2.49613	1.48027	0	2.57451	1.66096	0	2.02308	1.03271	2.02649	1.03561	0	0	1.55829	2.50056	2.26121	1.13075	-1.13046	0.0338767	AL117382.2	---
ENSG00000162512	SDC3	syndecan 3	9.48723	9.75427	11.405	11.3542	10.2405	10.6095	10.8548	9.36938	10.1457	9.93808	10.9389	10.5521	9.80639	9.53138	10.0749	9.26677	10.5294	9.95818	-0.571185	0.0338898	SDC3	syndecan 3
ENSG00000136950	ARPC5L	actin related protein 2/3 complex subunit 5 like	9.98373	9.94142	9.67258	9.98477	9.91787	9.93655	10.1959	10.6725	9.96877	10.365	9.67858	10.2626	10.5942	11.014	10.1159	9.85277	9.94755	10.2805	0.332937	0.0339046	ARPC5L	actin related protein 2/3 complex subunit 5 like
ENSG00000162298	SYVN1	synoviolin 1	11.4191	11.0813	11.2136	10.9142	11.1692	10.0505	10.2911	11.3324	11.3866	11.9565	10.7688	11.326	10.9267	12.059	11.0158	11.6415	10.877	11.3793	0.502264	0.0339457	SYVN1	synoviolin 1
ENSG00000163354	DCST2	DC-STAMP domain containing 2	4.3608	4.36128	4.35721	3.7581	3.93775	3.98823	3.80463	3.98365	2.02308	0	3.45824	2.64384	3.99406	2	3.54816	3.66079	4.08114	2.81243	-1.26872	0.0340176	DCST2	DC-STAMP domain containing 2
ENSG00000242265	PEG10	paternally expressed 10	4.99766	7.67653	6.81251	6.21704	5.08984	8.74319	4.42905	6.30019	5.70252	5.67812	6.33856	2.05309	5.16377	4.58496	6.71507	6.02374	6.28083	5.39556	-0.885275	0.0340674	PEG10	paternally expressed 10
ENSG00000213777	AC011487.1	---	2.90985	3.77104	0	1.88167	2.10621	1.16296	1.66096	0	1.6055	1.03271	0.822554	0	1.41108	0	0.980041	2.16809	1.92753	0.891109	-1.03642	0.034089	AC011487.1	---
ENSG00000099869	IGF2-AS	IGF2 antisense RNA	3.31596	3.77104	3.07497	4.01926	2.43495	3.27414	3.68846	4.21711	4.42156	3.51837	4.03304	3.76551	4.90876	3.32193	3.2858	5.38428	3.3684	4.09515	0.726755	0.0341388	IGF2-AS	IGF2 antisense RNA
ENSG00000154240	CEP112	centrosomal protein 112	7.92896	7.31944	8.95363	7.98012	7.70149	7.79968	7.65112	7.04	7.42283	7.0067	7.86002	7.63225	7.34685	7.14975	7.91997	7.78882	7.90492	7.46302	-0.441899	0.0342392	CEP112	centrosomal protein 112
ENSG00000080986	NDC80	NDC80, kinetochore complex component	2.55742	3.17812	3.36225	5.79689	7.28876	6.92124	0	2.71312	3.48736	0	5.55802	0	4.26701	3.58496	3.2858	4.11325	4.15781	3.00106	-1.15675	0.0342621	NDC80	NDC80, kinetochore complex component
ENSG00000174276	ZNHIT2	zinc finger HIT-type containing 2	6.39354	6.32845	6.23395	6.49985	6.32795	6.861	5.89194	7.04	6.7853	7.05289	6.23932	6.52902	6.3336	7.74147	6.89087	6.64392	6.36238	6.80627	0.443883	0.0342803	ZNHIT2	zinc finger HIT-type containing 2
ENSG00000123607	TTC21B	tetratricopeptide repeat domain 21B	8.8893	8.4539	8.72586	8.67006	8.29935	8.39049	8.54269	8.55151	8.39254	7.69374	8.6654	8.00082	8.08027	7.89482	8.27281	8.39924	8.56738	8.21679	-0.350585	0.0342861	TTC21B	tetratricopeptide repeat domain 21B
ENSG00000135587	SMPD2	sphingomyelin phosphodiesterase 2	6.50123	6.22132	6.73919	6.76023	6.88017	6.28222	7.18856	7.45229	7.20041	7.71544	6.53069	7.21963	7.58989	7.82018	6.46805	6.19407	6.65327	7.13229	0.479019	0.0343294	SMPD2	sphingomyelin phosphodiesterase 2
ENSG00000114784	EIF1B	eukaryotic translation initiation factor 1B	9.64817	9.87405	9.55108	9.80736	9.36855	9.56866	9.9246	10.9529	10.0222	9.84599	10.0224	9.33	9.95247	10.1396	10.2042	9.78391	9.6775	10.0282	0.350688	0.0343308	EIF1B	eukaryotic translation initiation factor 1B
ENSG00000231006	RPL7P32	ribosomal protein L7 pseudogene 32	6.26194	6.46619	5.82529	6.9909	6.44204	6.16254	6.30089	6.41425	7.25931	7.20381	6.11685	6.1779	7.08118	7.21917	6.60407	7.41832	6.34997	6.83276	0.48279	0.0343326	RPL7P32	ribosomal protein L7 pseudogene 32
ENSG00000198242	RPL23A	ribosomal protein L23a	12.4074	12.8405	12.6109	13.3144	13.0777	12.7494	12.8506	12.8787	13.7725	13.8943	12.4869	13.0887	13.4416	13.416	13.1664	12.9962	12.8358	13.2379	0.402085	0.0343786	RPL23A	ribosomal protein L23a
ENSG00000145708	CRHBP	corticotropin releasing hormone binding protein	10.3641	10.2502	11.9865	13.7735	11.037	12.0102	11.0572	6.54879	10.9263	10.6785	12.0505	11.3459	9.94277	8.17991	10.8279	8.83054	11.4969	9.92566	-1.57128	0.0344001	CRHBP	corticotropin releasing hormone binding protein
ENSG00000108679	LGALS3BP	galectin 3 binding protein	11.8732	10.6227	10.8736	11.6458	10.761	11.4729	10.4208	10.352	10.7889	10.0174	10.9845	10.5998	10.4798	11.1904	10.7338	10.902	11.0957	10.6721	-0.423652	0.034414	LGALS3BP	galectin 3 binding protein
ENSG00000126787	DLGAP5	DLG associated protein 5	2.74437	3.17812	3.22575	2.86097	7.24751	7.18965	3.09895	0	4.3511	3.38029	5.83549	0	2.36413	2	3.66337	2.77058	4.22076	2.70722	-1.51354	0.0344897	DLGAP5	DLG associated protein 5
ENSG00000203896	LIME1	Lck interacting transmembrane adaptor 1	8.07117	7.9152	5.50971	6.14589	6.46021	7.13982	5.53629	4.64858	5.15911	6.81901	6.76281	4.82271	5.09539	3.80735	5.31835	7.29534	6.68261	5.5254	-1.15721	0.0344995	LIME1	Lck interacting transmembrane adaptor 1
ENSG00000183578	TNFAIP8L3	TNF alpha induced protein 8 like 3	6.7831	6.34895	7.02281	7.34869	6.16026	6.90641	7.20979	8.86981	6.15954	6.23375	7.66622	7.66993	7.68602	8.41785	7.23619	6.40706	6.82572	7.37182	0.546103	0.0345009	TNFAIP8L3	TNF alpha induced protein 8 like 3
ENSG00000134852	CLOCK	clock circadian regulator	10.4071	10.5919	10.5084	9.35787	9.86089	10.1308	9.7919	10.1481	9.44639	9.48246	9.87557	9.6036	9.86147	9.55267	9.97943	9.80661	10.0927	9.7507	-0.341999	0.0345346	CLOCK	clock circadian regulator
ENSG00000170653	ATF7	activating transcription factor 7	9.63641	10.0106	9.76013	9.44936	9.3394	9.93655	9.11234	8.87835	9.67631	9.31015	9.57482	9.10641	9.10395	8.43879	9.32619	9.44611	9.6064	9.20679	-0.399612	0.034569	ATF7	activating transcription factor 7
ENSG00000116117	PARD3B	par-3 family cell polarity regulator beta	8.50226	8.87735	9.31496	8.64448	8.25841	7.97334	8.63582	7.78474	7.97894	8.05881	8.53994	7.95882	7.94109	6.98868	8.51066	8.82684	8.60094	8.06539	-0.535551	0.0346236	PARD3B	par-3 family cell polarity regulator beta
ENSG00000196998	WDR45	WD repeat domain 45	9.53394	9.63413	9.86295	9.45121	9.84887	9.39367	10.2314	10.32	9.88553	10.7985	9.2336	10.2724	9.81704	10.6839	10.0219	9.91327	9.70802	10.1051	0.397106	0.0346776	WDR45	WD repeat domain 45
ENSG00000206341	HLA-H	major histocompatibility complex, class I, H (pseudogene)	8.53747	8.33047	8.63108	9.02513	9.20848	9.16364	8.69347	8.32023	9.09133	8.69754	9.53949	10.0187	9.10395	10.585	9.27954	8.75086	8.79853	9.26517	0.466641	0.0346964	HLA-H	major histocompatibility complex, class I, H (pseudogene)
ENSG00000197182	MIRLET7BHG	MIRLET7B host gene	2.74437	3.77104	2.90658	5.05399	3.12318	2.84716	4.0122	4.89303	4.61439	5.10718	2.83759	5.6539	4.44242	4.58496	4.35406	3.90469	3.49407	4.48802	0.99395	0.0347432	MIRLET7BHG	MIRLET7B host gene
ENSG00000136938	ANP32B	acidic nuclear phosphoprotein 32 family member B	10.9189	10.5515	10.8441	11.3409	11.3346	11.0303	10.9477	11.6288	11.2468	11.5389	10.9552	10.8377	11.7194	12.0624	11.3069	10.9914	10.9954	11.3653	0.369832	0.0347732	ANP32B	acidic nuclear phosphoprotein 32 family member B
ENSG00000145020	AMT	aminomethyltransferase	8.4925	8.48202	8.35248	7.07949	7.72422	8.70086	7.83996	6.68489	6.96118	7.18319	8.38273	7.94659	6.27297	8.07146	7.7544	7.37848	8.09593	7.40399	-0.691943	0.0347803	AMT	aminomethyltransferase
ENSG00000243498	AC068228.1	---	1.39443	0	0	0	0	0	0	1.51221	0	2.0488	1.72491	1.63225	0	1	2.28986	2.50056	0.199205	1.41207	1.21286	0.0347986	AC068228.1	---
ENSG00000243156	MICAL3	microtubule associated monooxygenase, calponin and LIM domain containing 3	10.5338	9.96153	10.236	9.585	9.34674	10.0147	9.3885	9.6209	9.74146	9.3661	10.1625	9.19953	9.5827	9.10066	9.03402	9.16506	9.8666	9.44144	-0.425157	0.0348294	MICAL3	microtubule associated monooxygenase, calponin and LIM domain containing 3
ENSG00000251728	Y_RNA	Y RNA	0	0	0	0	1.67975	0	0	0.945781	2.02308	1.62842	0.822554	1.03561	1.41108	1	1.55829	2.50056	0.239965	1.43615	1.19619	0.0348464	Y_RNA	Y RNA
ENSG00000259770	AC015871.1	---	3.89193	4.09613	0	0	0	3.07639	0	0	0	1.62842	0	0	0	0	0	0	1.58064	0.180935	-1.3997	0.0348765	AC015871.1	---
ENSG00000055483	USP36	ubiquitin specific peptidase 36	8.40855	8.90531	9.05531	8.99761	8.92755	9.10641	8.66685	10.226	9.25705	9.41996	8.90628	8.99207	9.29708	10.1898	8.49129	8.73518	8.8668	9.27942	0.412621	0.034932	USP36	ubiquitin specific peptidase 36
ENSG00000254876	AL590705.5	---	5.4106	3.64406	3.70802	5.77348	4.88989	5.25456	3.27039	3.5987	3.19724	3.51837	4.22314	3.87281	3.08188	3.80735	4.66181	4.79647	4.56443	3.86197	-0.702454	0.0349395	AL590705.5	---
ENSG00000131747	TOP2A	topoisomerase (DNA) II alpha	3.89193	5.81272	6.55204	7.37226	9.51913	9.63312	4.10576	3.5987	5.61502	5.76393	8.53098	5.68367	4.94807	4.45943	6.4197	5.07096	6.69814	5.56561	-1.13253	0.0349568	TOP2A	topoisomerase (DNA) II alpha
ENSG00000171858	RPS21	ribosomal protein S21	10.6763	10.8492	9.99349	11.1737	10.7145	10.0387	10.6193	11.0065	11.7058	11.6487	10.1223	10.725	11.1711	11.1855	10.7591	11.0465	10.5807	11.0412	0.460424	0.0349579	RPS21	ribosomal protein S21
ENSG00000275491	LINC01730	long intergenic non-protein coding RNA 1730	2.74437	0	1.51434	1.48027	2.10621	1.16296	0	1.51221	2.02308	2.86299	3.11858	3.06176	4.06729	0	2.55154	3.3671	1.28688	2.50717	1.22029	0.0349836	LINC01730	long intergenic non-protein coding RNA 1730
ENSG00000100354	TNRC6B	trinucleotide repeat containing 6B	9.76486	9.80338	10.2114	9.42703	9.56182	9.2861	9.61821	9.24497	9.30444	9.34537	9.49563	9.42561	9.31786	9.20457	9.60731	9.66889	9.66754	9.40163	-0.265909	0.0349857	TNRC6B	trinucleotide repeat containing 6B
ENSG00000113460	BRIX1	BRX1, biogenesis of ribosomes	8.79457	8.91909	8.64453	8.81758	9.46842	9.17914	9.10102	9.64112	9.66183	9.48246	8.82059	9.32764	9.52376	10.5469	8.65339	9.01399	8.98919	9.40796	0.418772	0.035014	BRIX1	BRX1, biogenesis of ribosomes
ENSG00000189308	LIN54	lin-54 DREAM MuvB core complex component	7.65355	8.28863	7.66802	8.54081	8.89786	8.63942	8.25171	8.59016	8.74487	9.13873	8.26872	8.74262	8.77012	8.7211	8.55237	8.9711	8.27715	8.7222	0.445053	0.0350563	LIN54	lin-54 DREAM MuvB core complex component
ENSG00000261505	AL031714.1	---	3.72426	4.19003	3.70802	5.01458	4.03792	3.74326	5.06325	5.9786	5.02974	4.76271	3.73298	4.52667	5.16377	4.80735	5.24625	5.21364	4.21162	4.94019	0.728573	0.0351094	AL031714.1	---
ENSG00000131459	GFPT2	glutamine-fructose-6-phosphate transaminase 2	5.10398	4.89503	5.72757	6.81859	6.36699	5.38862	6.6032	7.10938	6.98464	4.52126	7.11445	6.25925	7.63876	8.47978	6.38654	4.53172	5.84343	6.55842	0.714995	0.0351367	GFPT2	glutamine-fructose-6-phosphate transaminase 2
ENSG00000188958	UTS2B	urotensin 2B	0	2.15398	0	3.3147	2.10621	3.60318	0	0	0	0	0	0	1.80284	0	0	0	1.59687	0.200315	-1.39655	0.0351649	UTS2B	urotensin 2B
ENSG00000021826	CPS1	carbamoyl-phosphate synthase 1	17.1687	16.7283	15.3676	14.5019	14.3213	15.6674	15.2416	16.3255	14.2911	13.6969	15.2422	14.4892	13.8625	15.6018	13.2935	14.948	15.571	14.639	-0.932	0.0351704	CPS1	carbamoyl-phosphate synthase 1
ENSG00000173083	HPSE	heparanase	6.3795	7.22277	7.61436	8.13053	7.33871	7.3296	7.91296	6.26587	7.4399	6.43898	7.5527	7.1679	6.5787	6.16993	7.39467	6.02374	7.41835	6.78138	-0.636972	0.035201	HPSE	heparanase
ENSG00000106066	CPVL	carboxypeptidase, vitellogenic like	8.19662	9.16726	10.661	11.1637	9.44123	9.92924	10.3084	7.00921	9.34353	9.3384	9.82878	9.98019	8.79458	8.91886	9.96406	8.14993	9.8382	9.03639	-0.801809	0.0352123	CPVL	carboxypeptidase, vitellogenic like
ENSG00000077150	NFKB2	nuclear factor kappa B subunit 2	9.01499	8.99585	9.60539	9.23468	9.72286	9.58969	10.4219	11.6076	9.29274	9.55446	8.95624	10.5722	11.2216	10.8611	9.52401	8.95426	9.5122	10.0605	0.54826	0.0352243	NFKB2	nuclear factor kappa B subunit 2
ENSG00000155329	ZCCHC10	zinc finger CCHC-type containing 10	8.50549	8.27262	8.50772	8.19363	8.19473	7.97334	8.15105	8.2821	7.76526	7.85883	7.97466	8.03588	7.97002	8.16993	7.86084	8.16757	8.25694	8.00945	-0.247486	0.0353322	ZCCHC10	zinc finger CCHC-type containing 10
ENSG00000111452	ADGRD1	adhesion G protein-coupled receptor D1	7.18143	5.68952	6.4485	7.70488	8.68262	7.97334	7.08897	5.5065	7.37036	6.85855	5.51017	6.54533	5.92451	7.63662	6.92591	6.44613	7.25275	6.5249	-0.727854	0.0353526	ADGRD1	adhesion G protein-coupled receptor D1
ENSG00000278527	SNORD22	Small nucleolar RNA SNORD22	0.859513	3.17812	0.947361	3.3147	3.93775	2.57451	1.66096	3.5987	4.93657	3.51837	2.02649	4.06607	4.20346	4.39232	2.55154	3.3671	2.35327	3.62896	1.27569	0.0353774	SNORD22	Small nucleolar RNA SNORD22
ENSG00000106236	NPTX2	neuronal pentraxin 2	5.66334	2.15398	5.50971	4.5469	3.29498	5.38862	6.78391	10.3784	6.63029	5.38505	3.24091	3.06176	6.92249	8.8392	5.89121	7.24083	4.76306	6.3989	1.63584	0.0353921	NPTX2	neuronal pentraxin 2
ENSG00000280138	AC027290.2	---	4.47087	5.51907	4.48232	4.97408	4.13159	3.87094	4.27644	5.28449	5.83751	4.52126	4.09923	4.38886	5.22905	5.42626	6.18916	6.04934	4.53219	5.22502	0.692831	0.0354035	AC027290.2	---
ENSG00000239797	RPL21P39	ribosomal protein L21 pseudogene 39	4.57313	4.7172	4.48232	5.39815	4.83525	4.61731	4.75207	5.38385	5.78502	6.19308	4.6337	5.19769	5.02361	5.75489	5.09025	4.67016	4.76792	5.30358	0.535663	0.0354143	RPL21P39	ribosomal protein L21 pseudogene 39
ENSG00000119927	GPAM	glycerol-3-phosphate acyltransferase, mitochondrial	12.9162	13.5209	11.5639	9.91426	13.4411	13.5729	12.9596	11.3657	11.838	12.1985	11.9607	12.3704	12.6977	10.6944	11.0962	12.9585	12.5556	11.9089	-0.646665	0.0354714	GPAM	glycerol-3-phosphate acyltransferase, mitochondrial
ENSG00000183036	PCP4	Purkinje cell protein 4	0	2.48561	0	2.45286	0	3.07639	0	0	0	0	0	0	0	0	0	0	1.14498	0	-1.14498	0.0354978	PCP4	Purkinje cell protein 4
ENSG00000143450	OAZ3	ornithine decarboxylase antizyme 3	4.99766	5.75243	5.25299	5.65034	5.59635	5.85802	4.63139	6.59099	5.78502	5.4895	7.31577	7.13594	5.3804	6.22882	4.66181	5.21364	5.39131	5.97799	0.586674	0.0355234	OAZ3	ornithine decarboxylase antizyme 3
ENSG00000178852	EFCAB13	EF-hand calcium binding domain 13	7.10668	7.10718	5.56734	5.57108	4.6577	4.38036	6.065	6.30019	4.93657	2.63908	5.55802	4.38886	4.73986	5.90689	3.77007	4.11325	5.77933	4.70587	-1.07347	0.0355627	EFCAB13	EF-hand calcium binding domain 13
ENSG00000109536	FRG1	FSHD region gene 1	9.34451	9.45894	8.84132	9.62479	9.42282	9.19753	9.05484	9.79345	9.51043	9.74411	9.31419	9.44964	9.60593	10.2131	9.365	9.3971	9.27782	9.59922	0.321395	0.0356282	FRG1	FSHD region gene 1
ENSG00000165152	TMEM246	transmembrane protein 246	8.82598	7.74774	8.02755	8.07893	7.64701	7.67401	8.25682	7.66476	7.77874	5.38505	7.05732	8.32281	6.34836	8.08215	7.04757	5.99768	8.03686	7.07605	-0.960816	0.0356347	TMEM246	transmembrane protein 246
ENSG00000185527	PDE6G	phosphodiesterase 6G	3.72426	4.43984	5.14358	5.90858	3.93775	3.44802	4.10576	3.35928	3.48736	4.06074	3.96367	3.64959	3.83541	4.16993	3.42294	4.37858	4.38683	3.81417	-0.572659	0.035647	PDE6G	phosphodiesterase 6G
ENSG00000108179	PPIF	peptidylprolyl isomerase F	11.951	12.206	11.3901	10.9629	11.5241	12.1489	11.6752	12.2167	11.7902	12.9757	11.3393	12.7086	12.3709	12.4333	12.1322	11.6288	11.694	12.1773	0.48327	0.0356727	PPIF	peptidylprolyl isomerase F
ENSG00000213996	TM6SF2	transmembrane 6 superfamily member 2	8.32674	8.05903	6.08408	7.35659	7.33871	8.26825	7.31148	4.35409	7.24966	7.34042	7.19232	7.12513	6.28837	5.93074	7.61106	6.90455	7.53498	6.66626	-0.868724	0.0356837	TM6SF2	transmembrane 6 superfamily member 2
ENSG00000130255	RPL36	ribosomal protein L36	11.0538	11.1102	10.8169	11.7722	11.3481	10.9119	10.8068	11.3205	11.875	12.0305	10.9948	11.3517	11.35	11.7879	11.2107	11.6551	11.1171	11.5085	0.391339	0.0357375	RPL36	ribosomal protein L36
ENSG00000159377	PSMB4	proteasome subunit beta 4	11.9195	11.4609	11.3038	11.6259	11.6517	11.7298	11.515	11.7575	12.0696	12.265	11.1648	11.759	11.9248	12.2	11.8061	12.2616	11.6009	11.9121	0.311138	0.0357443	PSMB4	proteasome subunit beta 4
ENSG00000260941	LINC00622	long intergenic non-protein coding RNA 622	5.03398	4.2782	4.14651	4.17033	3.5872	3.27414	3.27039	3.48395	2.34653	2.0488	3.64709	2.86788	3.91692	3	0	3.90469	3.96582	2.80176	-1.16406	0.0358082	LINC00622	long intergenic non-protein coding RNA 622
ENSG00000076248	UNG	uracil DNA glycosylase	10.0125	10.098	10.208	9.67146	9.86089	10.0639	9.67082	9.19796	9.00505	9.70668	9.85536	9.88887	9.52701	9.38586	9.92129	9.86183	9.94079	9.59443	-0.346354	0.0358172	UNG	uracil DNA glycosylase
ENSG00000074319	TSG101	tumor susceptibility 101	9.96269	10.1131	10.064	9.99113	9.8745	10.1717	10.1704	10.3844	10.0433	10.6748	10.0922	10.5781	10.494	10.3332	9.96406	10.0731	10.0496	10.293	0.243361	0.0358258	TSG101	tumor susceptibility 101
ENSG00000233927	RPS28	ribosomal protein S28	11.295	11.189	10.6585	11.6119	11.037	10.7788	11.0224	11.0775	11.7918	11.9098	10.9366	11.2137	11.4445	11.5265	11.4907	11.6389	11.0847	11.4478	0.363121	0.0358459	RPS28	ribosomal protein S28
ENSG00000270269	IMMP1LP1	inner mitochondrial membrane peptidase subunit 1 pseudogene 1	0	0	0	0	0	0	0	0	2.02308	0	1.34316	3.06176	1.41108	0	2.28986	0	0	1.12544	1.12544	0.0358813	IMMP1LP1	inner mitochondrial membrane peptidase subunit 1 pseudogene 1
ENSG00000035687	ADSS	adenylosuccinate synthase	9.47902	9.19301	9.61396	9.82598	9.94393	9.82666	9.90359	10.8276	10.2168	10.2778	9.68533	10.1775	9.70103	10.9204	9.76881	9.20262	9.68373	10.0864	0.40269	0.0358893	ADSS	adenylosuccinate synthase
ENSG00000273156	AC124016.2	---	1.78378	2.15398	0	2.19535	1.07167	0	0	0	3.02689	2.0488	1.72491	2.37849	2.11061	2.80735	2.96489	3.78789	1.02925	2.31665	1.28739	0.0359007	AC124016.2	---
ENSG00000141380	SS18	SS18, nBAF chromatin remodeling complex subunit	10.6597	10.6175	10.7601	10.7469	11.0423	11.0456	11.1118	11.3453	10.9331	11.2613	10.9468	11.3377	11.2684	11.2644	10.8705	10.8152	10.8548	11.1159	0.261022	0.0359202	SS18	SS18, nBAF chromatin remodeling complex subunit
ENSG00000143256	PFDN2	prefoldin subunit 2	10.1198	10.1761	9.83975	10.1116	9.73223	9.41739	9.9966	10.9569	9.73974	10.3138	9.04288	10.6997	10.5621	11.137	9.75264	10.8207	9.91335	10.3362	0.422812	0.0359405	PFDN2	prefoldin subunit 2
ENSG00000092871	RFFL	ring finger and FYVE like domain containing E3 ubiquitin protein ligase	10.3497	10.9228	11.1204	10.5891	10.9696	10.6579	11.4529	11.07	11.2371	11.4408	10.8701	11.0383	11.24	11.7899	11.247	11.2444	10.8661	11.242	0.375886	0.0359586	RFFL	ring finger and FYVE like domain containing E3 ubiquitin protein ligase
ENSG00000100442	FKBP3	FK506 binding protein 3	11.2729	10.9616	10.5185	10.6934	10.5007	10.8847	10.4479	9.86541	10.0278	10.5804	10.0468	10.5461	10.5097	10.6724	10.3756	10.8638	10.7542	10.3875	-0.366694	0.0359769	FKBP3	FK506 binding protein 3
ENSG00000244693	CTAGE8	CTAGE family member 8	7.54449	6.88653	7.84155	6.48551	6.86661	6.76564	7.57954	9.75685	7.08575	7.43936	7.00649	7.01232	8.08909	8.21432	7.10984	7.67008	7.13855	7.70934	0.57079	0.0360301	CTAGE8	CTAGE family member 8
ENSG00000186648	CARMIL3	capping protein regulator and myosin 1 linker 3	5.85822	5.75243	3.60171	3.17872	2.10621	3.07639	0	2.90374	3.61312	0	2.83759	2.05309	3.45368	0	3.66337	0	3.36767	2.05829	-1.30938	0.0360592	CARMIL3	capping protein regulator and myosin 1 linker 3
ENSG00000181104	F2R	coagulation factor II thrombin receptor	8.29342	9.59174	10.2602	11.303	9.84715	9.95828	10.1879	8.40546	9.94505	9.70487	9.99772	9.44747	8.9259	9.37287	9.79115	8.96775	9.92026	9.39536	-0.524897	0.0360637	F2R	coagulation factor II thrombin receptor
ENSG00000143195	ILDR2	immunoglobulin like domain containing receptor 2	6.62543	7.66022	7.84155	5.20164	5.45854	6.00445	6.11085	4.84734	6.38787	5.06272	6.03468	4.06607	6.37745	4.32193	6.35261	6.42673	6.41467	5.54193	-0.872736	0.0360955	ILDR2	immunoglobulin like domain containing receptor 2
ENSG00000226525	RPS7P10	ribosomal protein S7 pseudogene 10	5.38271	5.32575	4.42112	5.65034	5.94492	5.25456	5.01582	5.56412	6.13878	6.33067	5.08945	5.6539	5.94408	5.9542	5.48425	6.44613	5.28503	5.84506	0.560032	0.0361019	RPS7P10	ribosomal protein S7 pseudogene 10
ENSG00000139445	FOXN4	forkhead box N4	3.42936	2.98205	0.947361	1.48027	0	3.87094	0	0	0	0	2.02649	0	1.80284	0	0	0	1.81571	0.425481	-1.39023	0.0361051	FOXN4	forkhead box N4
ENSG00000114446	IFT57	intraflagellar transport 57	7.75494	7.62703	7.78194	9.22824	8.84699	7.98043	8.19961	9.08193	8.56589	8.80265	8.58106	8.57002	8.98851	9.66711	8.54487	8.44817	8.20274	8.80558	0.602838	0.0361092	IFT57	intraflagellar transport 57
ENSG00000122787	AKR1D1	aldo-keto reductase family 1 member D1	10.9055	12.2486	8.4283	9.29964	9.73969	9.50365	7.44279	7.25646	9.91483	8.40436	10.7125	6.59318	6.17698	8.65821	8.82098	7.18418	9.6526	8.1913	-1.4613	0.0361116	AKR1D1	aldo-keto reductase family 1 member D1
ENSG00000197555	SIPA1L1	signal induced proliferation associated 1 like 1	10.4002	10.1602	10.3043	9.9421	10.191	10.2279	10.2609	10.2103	10.0968	10.1049	10.1013	9.98916	9.90955	9.96145	9.94995	10.04	10.2124	10.0404	-0.172008	0.0361877	SIPA1L1	signal induced proliferation associated 1 like 1
ENSG00000163029	SMC6	structural maintenance of chromosomes 6	9.66563	10.3102	10.299	9.53714	10.2704	10.0318	9.8905	9.58133	10.0682	9.88322	9.78295	9.55005	9.36582	9.10066	9.77042	9.85821	10.0007	9.66232	-0.33836	0.0362018	SMC6	structural maintenance of chromosomes 6
ENSG00000171606	ZNF274	zinc finger protein 274	9.17396	9.67733	9.15735	9.27275	8.99453	8.82431	9.96574	10.3794	9.69777	9.97002	9.65126	10.2452	9.74633	10.1396	9.10453	8.8007	9.29514	9.74831	0.45317	0.0362217	ZNF274	zinc finger protein 274
ENSG00000226413	OR8T1P	olfactory receptor family 8 subfamily T member 1 pseudogene	0	0	0	0	0	0	0	1.91789	1.6055	1.62842	0	0	1.80284	3.32193	0	0	0	1.14184	1.14184	0.0362262	OR8T1P	olfactory receptor family 8 subfamily T member 1 pseudogene
ENSG00000197353	LYPD2	LY6/PLAUR domain containing 2	3.89193	2.48561	2.90658	5.67582	2.10621	4.38036	3.27039	2.49343	4.02879	3.64438	2.02649	0	0	0	0	0	3.53099	1.35479	-2.1762	0.0362426	LYPD2	LY6/PLAUR domain containing 2
ENSG00000163611	SPICE1	spindle and centriole associated protein 1	8.10571	7.80822	8.20596	8.18921	8.21092	7.78354	7.98245	8.57972	8.81526	8.14128	8.07675	8.5048	8.52896	7.70736	8.39871	8.37919	8.04086	8.348	0.307145	0.0363084	SPICE1	spindle and centriole associated protein 1
ENSG00000259051	HNRNPUP1	heterogeneous nuclear ribonucleoprotein U pseudogene 1	5.17074	4.6527	3.60171	4.88948	5.13578	3.74326	5.01582	5.95725	4.3511	4.96948	5.43527	4.92598	5.22905	6.40939	5.38702	5.07096	4.60136	5.30394	0.702589	0.036341	HNRNPUP1	heterogeneous nuclear ribonucleoprotein U pseudogene 1
ENSG00000136250	AOAH	acyloxyacyl hydrolase	6.16702	7.98236	9.19211	9.68093	8.12242	7.6205	8.45651	5.38385	7.82497	6.58758	8.63225	7.81824	7.91653	6.98868	8.16939	6.67714	8.17455	7.33318	-0.841368	0.0363449	AOAH	acyloxyacyl hydrolase
ENSG00000275131	AC241952.1	---	10.1563	10.4952	8.98305	8.71684	8.49269	9.51591	8.76691	8.51179	9.25223	8.52396	9.33494	8.72841	8.22331	7.46761	8.82717	9.50973	9.30385	8.70879	-0.595052	0.0363813	AC241952.1	---
ENSG00000182544	MFSD5	major facilitator superfamily domain containing 5	7.53819	8.17265	8.55478	8.21985	7.97857	8.04277	7.93225	9.23835	8.2105	8.25431	8.06851	8.69224	8.43525	8.6865	8.1547	8.27997	8.06272	8.4467	0.383979	0.0363911	MFSD5	major facilitator superfamily domain containing 5
ENSG00000169679	BUB1	BUB1 mitotic checkpoint serine/threonine kinase	2.34259	2.75508	4.14651	5.90858	7.30895	7.26132	2.67935	2.49343	2.8337	2.63908	6.28269	4.45941	3.99406	4.32193	4.42109	2.77058	4.62891	3.80177	-0.827136	0.0363982	BUB1	BUB1 mitotic checkpoint serine/threonine kinase
ENSG00000237372	UNQ6494	uncharacterized LOC100129066	0	0	0	2.45286	3.12318	2.84716	3.09895	4.84734	4.55293	3.86753	2.48831	0	4.20346	5.32193	3.86941	0	1.64602	3.23899	1.59297	0.0364146	UNQ6494	uncharacterized LOC100129066
ENSG00000002822	MAD1L1	MAD1 mitotic arrest deficient like 1	7.55077	7.66022	7.15084	7.98522	7.25793	7.29586	7.35976	6.9127	6.83778	7.61126	7.36368	7.47084	6.65194	6.22882	6.97135	6.98634	7.4658	7.00386	-0.461946	0.0364543	MAD1L1	MAD1 mitotic arrest deficient like 1
ENSG00000224373	IGHV4-59	immunoglobulin heavy variable 4-59	7.48014	7.43901	8.88447	11.4775	7.11617	9.15739	7.95128	6.69782	7.98477	6.94681	8.53397	8.0701	9.10612	8.56986	8.26371	6.77245	8.50086	7.88285	-0.618014	0.0364726	IGHV4-59	immunoglobulin heavy variable 4-59
ENSG00000141543	EIF4A3	eukaryotic translation initiation factor 4A3	9.77294	10.2157	9.93586	10.1987	10.4264	10.3913	10.2609	11.3089	10.4079	10.6692	10.1932	10.5702	10.4068	11.2952	10.3976	9.69345	10.1717	10.5492	0.377459	0.0364795	EIF4A3	eukaryotic translation initiation factor 4A3
ENSG00000214756	METTL12	methyltransferase like 12	4.99766	4.19003	4.42112	4.65335	4.71934	6.93591	4.96679	5.14039	5.35186	4.96948	5.2727	5.31649	5.54327	5.24793	4.76861	5.02008	4.98346	5.1812	0.197741	0.0365041	METTL12	methyltransferase like 12
ENSG00000283189	AC104452.1	---	7.89481	8.8914	6.87089	7.29214	7.17235	7.53633	5.15366	5.44648	7.84434	5.5227	7.58193	6.33626	6.25741	5.88264	6.71507	6.60992	7.2588	6.4663	-0.792493	0.0365089	AC104452.1	---
ENSG00000110077	MS4A6A	membrane spanning 4-domains A6A	10.077	11.1273	11.3871	12.396	10.2601	10.9781	9.76884	8.96112	11.2297	9.73528	10.848	10.7106	10.3186	9.52356	10.6019	9.87083	10.8563	10.2	-0.656394	0.0365123	MS4A6A	membrane spanning 4-domains A6A
ENSG00000101323	HAO1	hydroxyacid oxidase 1	13.6949	13.8569	12.8334	11.8137	12.2582	13.3981	12.4827	10.4383	12.8157	12.3177	12.851	12.1621	11.3628	11.6511	13.1741	12.4046	12.9054	12.1308	-0.774598	0.0365167	HAO1	hydroxyacid oxidase 1
ENSG00000273108	AL121929.2	---	1.39443	0	0	0	0	2.23802	0	1.91789	3.19724	0	2.2758	2.05309	2.57969	2	0	3.1943	0.518922	1.91311	1.39419	0.0365214	AL121929.2	---
ENSG00000214485	RPL7P1	ribosomal protein L7 pseudogene 1	9.01271	9.12628	8.86162	9.39861	9.41586	8.99169	9.22609	9.1704	9.80545	10.2106	8.76815	9.20467	9.56068	10	9.42543	9.35666	9.14755	9.50022	0.352672	0.0365392	RPL7P1	ribosomal protein L7 pseudogene 1
ENSG00000184979	USP18	ubiquitin specific peptidase 18	7.89481	6.62593	6.78848	7.90669	7.79034	8.5985	6.798	6.78523	7.71002	7.02998	7.56446	5.92716	5.02361	6.67243	7.22685	6.44613	7.48611	6.70954	-0.776564	0.0365775	USP18	ubiquitin specific peptidase 18
ENSG00000109756	RAPGEF2	Rap guanine nucleotide exchange factor 2	10.6784	11.1258	11.3227	10.4465	10.4886	11.0044	10.4231	9.49507	10.8388	10.7415	10.5235	10.5164	9.83681	9.55651	10.7728	10.1192	10.7842	10.2667	-0.517483	0.0365799	RAPGEF2	Rap guanine nucleotide exchange factor 2
ENSG00000188976	NOC2L	NOC2 like nucleolar associated transcriptional repressor	10.2208	10.0689	9.85284	10.1313	10.1398	9.99553	9.88391	11.0468	10.1405	10.6821	9.84092	10.3741	10.4208	10.8106	9.77042	10.1971	10.0419	10.3648	0.322954	0.0365891	NOC2L	NOC2 like nucleolar associated transcriptional repressor
ENSG00000119402	FBXW2	F-box and WD repeat domain containing 2	11.3237	11.2496	11.3941	10.3209	10.9846	11.2161	11.0557	10.9842	10.5958	10.8237	11.0234	10.9415	10.5438	10.3565	10.7982	10.8879	11.0778	10.7728	-0.305047	0.0365973	FBXW2	F-box and WD repeat domain containing 2
ENSG00000100139	MICALL1	MICAL like 1	8.17646	7.17764	8.57599	7.66726	8.42029	8.33621	7.65886	8.60396	8.13911	8.47391	8.30423	8.24506	8.92835	9.3015	8.57093	7.95379	8.00182	8.50231	0.500498	0.0366323	MICALL1	MICAL like 1
ENSG00000275700	AATF	apoptosis antagonizing transcription factor	9.9148	9.84187	9.64941	9.71359	9.83328	9.63537	9.70299	10.8371	9.75176	9.97002	9.83608	10.5541	10.1156	10.5831	9.45171	9.70155	9.7559	10.089	0.333111	0.0367332	AATF	apoptosis antagonizing transcription factor
ENSG00000207357	RNU6-2	RNA, U6 small nuclear 2	3.72426	3.3507	2.90658	3.02857	1.07167	3.60318	2.90435	3.5987	1.6055	1.62842	2.02649	2.37849	1.41108	1.58496	0	1.73532	2.94133	1.77433	-1.167	0.0367695	RNU6-2	RNA, U6 small nuclear 2
ENSG00000105640	RPL18A	ribosomal protein L18a	11.7311	11.6165	11.2432	12.4462	11.6747	11.234	11.6463	11.8671	12.4395	12.5851	11.3739	11.8921	12.185	12.4168	12.0559	12.0124	11.656	12.092	0.435976	0.0367737	RPL18A	ribosomal protein L18a
ENSG00000118046	STK11	serine/threonine kinase 11	9.37491	9.43756	9.74147	9.06184	9.30462	9.30318	8.9919	9.85678	9.47359	9.76853	9.43445	9.75152	9.38026	9.53138	9.66376	9.43401	9.3165	9.58825	0.271755	0.0367856	STK11	serine/threonine kinase 11
ENSG00000087299	L2HGDH	L-2-hydroxyglutarate dehydrogenase	9.46246	9.37646	9.22382	7.07949	8.70184	9.44843	8.85713	8.5692	8.57364	8.51573	9.11464	8.7913	7.24005	7.87036	8.37355	7.13721	8.87852	8.24286	-0.635661	0.0367857	L2HGDH	L-2-hydroxyglutarate dehydrogenase
ENSG00000172578	KLHL6	kelch like family member 6	6.39354	7.31944	7.44022	8.95141	7.30895	7.00713	7.77022	6.2484	6.61534	6.0861	7.25899	6.78396	7.81919	7.35755	7.10984	5.34347	7.45584	6.73587	-0.719975	0.0367902	KLHL6	kelch like family member 6
ENSG00000244682	FCGR2C	Fc fragment of IgG receptor IIc (gene/pseudogene)	6.29224	7.8008	8.06804	9.73345	7.48786	7.51694	8.27708	6.3985	7.86345	6.5718	8.2759	7.47084	7.77068	7.26679	6.84279	7.27378	7.88234	7.30384	-0.578507	0.0368657	FCGR2C	Fc fragment of IgG receptor IIc (gene/pseudogene)
ENSG00000116748	AMPD1	adenosine monophosphate deaminase 1	3.31596	0	3.36225	6.94972	2.70251	4.94205	4.63139	2.49343	0	2.63908	4.72037	2.37849	4.59879	2	1.96996	0	3.70055	2.31112	-1.38943	0.0368696	AMPD1	adenosine monophosphate deaminase 1
ENSG00000114209	PDCD10	programmed cell death 10	9.65109	9.4471	9.48346	9.16441	9.31963	9.29181	9.30958	10.2786	9.53646	9.78573	9.55726	9.86957	9.80639	9.20701	9.61628	9.34637	9.38101	9.66708	0.286065	0.0368709	PDCD10	programmed cell death 10
ENSG00000163541	SUCLG1	succinate-CoA ligase alpha subunit	12.7041	12.193	11.6092	10.8195	11.2839	12.0067	11.6947	11.5014	11.3436	11.3832	11.2963	11.4169	11.1364	11.6961	11.6287	11.28	11.7587	11.4092	-0.349537	0.0368751	SUCLG1	succinate-CoA ligase alpha subunit
ENSG00000102287	GABRE	gamma-aminobutyric acid type A receptor epsilon subunit	8.09715	8.11396	8.38088	7.10785	7.16129	7.85478	8.68591	6.3985	7.03046	5.5227	6.33856	8.08691	7.92147	6.55459	6.84279	8.26365	7.91455	6.99551	-0.919032	0.0369042	GABRE	gamma-aminobutyric acid type A receptor epsilon subunit
ENSG00000103479	RBL2	RB transcriptional corepressor like 2	11.4672	11.9318	11.9272	11.63	11.5128	11.2937	11.4389	11.1255	11.2432	10.6646	11.8138	11.3389	11.0271	10.6129	11.3944	11.5553	11.6002	11.1973	-0.402919	0.0369043	RBL2	RB transcriptional corepressor like 2
ENSG00000081479	LRP2	LDL receptor related protein 2	7.10668	6.75444	8.39288	3.93735	4.88989	7.38412	4.56705	3.70498	4.48874	2.0488	6.41851	4.31468	6.28837	6.59991	6.11012	5.38428	6.14749	5.03982	-1.10767	0.036905	LRP2	LDL receptor related protein 2
ENSG00000145912	NHP2	NHP2 ribonucleoprotein	9.44907	9.65486	9.08768	9.60171	9.92607	9.31726	9.64962	10.099	10.6062	10.7389	9.25916	10.0647	9.64383	10.3174	9.31961	9.32032	9.52661	9.9299	0.403286	0.0369354	NHP2	NHP2 ribonucleoprotein
ENSG00000160233	LRRC3	leucine rich repeat containing 3	10.5805	9.37145	9.78615	7.92274	9.06449	9.83843	8.78824	9.18883	8.269	9.13336	9.29491	8.94366	7.33948	8.64386	8.86978	9.25856	9.33601	8.77127	-0.564734	0.0369438	LRRC3	leucine rich repeat containing 3
ENSG00000133800	LYVE1	lymphatic vessel endothelial hyaluronan receptor 1	11.1898	12.4648	12.0003	13.2681	10.2858	12.3499	11.2622	11.5092	11.7612	11.1548	12.0061	12.131	10.1285	10.9196	10.5211	10.1784	11.8316	11.1456	-0.686006	0.037044	LYVE1	lymphatic vessel endothelial hyaluronan receptor 1
ENSG00000114491	UMPS	uridine monophosphate synthetase	9.56994	9.75811	10.1736	9.33606	9.78904	9.84622	9.79013	9.90078	9.78721	10.0967	9.78923	10.4146	10.5958	10.9454	10.1323	9.45571	9.75187	10.1242	0.372319	0.0370455	UMPS	uridine monophosphate synthetase
ENSG00000141027	NCOR1	nuclear receptor corepressor 1	11.3465	11.4674	11.8146	10.7492	11.4026	11.5308	11.5309	10.7828	10.8517	10.8145	11.5983	11.3546	10.7545	10.7532	11.4897	10.6556	11.406	11.0061	-0.399894	0.037061	NCOR1	nuclear receptor corepressor 1
ENSG00000179943	FIZ1	FLT3 interacting zinc finger 1	7.52549	7.70862	7.25096	7.73549	7.36788	7.30719	7.35023	8.39755	8.00785	7.79912	7.80159	7.27936	8.14935	7.42626	7.35236	8.05835	7.4637	7.80798	0.344282	0.0371593	FIZ1	FLT3 interacting zinc finger 1
ENSG00000272102	AL133406.3	---	0	1.72262	0	1.48027	2.10621	0	2.08522	2.23417	3.19724	2.63908	2.02649	0	1.80284	2	2.96489	3.52141	1.05633	2.26512	1.20879	0.037169	AL133406.3	---
ENSG00000125538	IL1B	interleukin 1 beta	4.75818	6.15301	6.52321	6.87468	6.66206	5.47154	7.82628	5.69885	4.78445	6.23375	6.37909	8.86137	8.89102	10.8439	7.73478	2.16809	6.32414	6.84393	0.519788	0.0371787	IL1B	interleukin 1 beta
ENSG00000198692	EIF1AY	eukaryotic translation initiation factor 1A, Y-linked	9.67573	9.5657	9.91243	9.78558	9.55972	9.65324	9.7813	10.2193	9.75687	10.409	9.33494	9.93448	9.83157	10.7903	10.0111	9.90978	9.70481	10.0219	0.317112	0.0371934	EIF1AY	eukaryotic translation initiation factor 1A, Y-linked
ENSG00000153989	NUS1	NUS1 dehydrodolichyl diphosphate synthase subunit	10.9992	11.6921	11.4716	11.492	11.4725	11.2922	11.6833	11.7236	11.5375	12.3247	11.0576	11.7855	12.0196	12.5649	11.7756	11.4762	11.4433	11.8072	0.363942	0.0372057	NUS1	NUS1 dehydrodolichyl diphosphate synthase subunit
ENSG00000119718	EIF2B2	eukaryotic translation initiation factor 2B subunit beta	9.26462	8.96629	8.96975	8.77695	9.2004	9.00567	9.16491	9.835	9.31836	9.74058	9.29137	9.84013	9.41574	9.66178	8.92278	8.43852	9.0498	9.38492	0.335119	0.037208	EIF2B2	eukaryotic translation initiation factor 2B subunit beta
ENSG00000048462	TNFRSF17	TNF receptor superfamily member 17	3.89193	4.2782	3.89967	6.91803	2.92812	4.19758	3.27039	2.49343	5.23933	4.38346	5.05652	4.38886	5.29151	4.58496	5.00543	4.20722	4.1977	4.51675	0.319043	0.0372263	TNFRSF17	TNF receptor superfamily member 17
ENSG00000225159	NPM1P39	nucleophosmin 1 pseudogene 39	3.42936	3.99569	3.07497	4.01926	3.71375	3.74326	3.68846	4.21711	4.19893	5.23287	3.73298	4.23647	4.20346	4.32193	4.28377	3.90469	3.6664	4.25913	0.592738	0.037255	NPM1P39	nucleophosmin 1 pseudogene 39
ENSG00000270240	AC015849.1	---	2.55742	2.75508	1.51434	2.45286	0	0	0	0	0	0	0	0	1.41108	0	0	0	1.32567	0.156787	-1.16889	0.0373122	AC015849.1	---
ENSG00000117133	RPF1	ribosome production factor 1 homolog	9.93775	10.0596	9.91659	9.60834	9.51044	9.87315	9.76884	10.5549	10.0335	10.1666	9.59789	10.0996	9.99532	10.7474	10.121	9.77627	9.81068	10.1214	0.310694	0.0373156	RPF1	ribosome production factor 1 homolog
ENSG00000089195	TRMT6	tRNA methyltransferase 6	7.95286	8.02757	8.2418	7.77729	8.42954	8.36902	8.70098	8.73832	8.82504	9.01294	8.32167	8.46248	8.83446	8.96578	8.57462	7.64511	8.21415	8.59782	0.38367	0.0373434	TRMT6	tRNA methyltransferase 6
ENSG00000157502	MUM1L1	MUM1 like 1	7.66518	7.07061	6.82438	7.44075	5.6917	6.30501	4.63139	6.60478	6.77188	5.34848	6.75256	4.87527	4.98633	5.80735	5.35309	5.42396	6.51843	5.7693	-0.74913	0.0373642	MUM1L1	MUM1 like 1
ENSG00000134901	KDELC1	KDEL motif containing 1	8.98051	8.68515	8.25062	7.86852	8.28414	8.67047	8.7489	8.30341	7.6599	8.37739	8.15663	8.82175	7.79783	7.60733	7.97119	7.87723	8.49833	8.06363	-0.434701	0.0373766	KDELC1	KDEL motif containing 1
ENSG00000137216	TMEM63B	transmembrane protein 63B	10.6784	10.5135	10.317	8.98492	9.88966	10.5771	10.4082	10.1363	9.99356	9.43747	9.95814	10.0216	9.4975	9.21675	10.1273	9.78582	10.1955	9.79715	-0.39839	0.0373851	TMEM63B	transmembrane protein 63B
ENSG00000107186	MPDZ	multiple PDZ domain crumbs cell polarity complex component	11.2686	11.6936	10.8836	10.568	10.5962	11.4615	10.4036	9.44034	11.0307	10.4516	11.2892	9.66833	9.57645	9.55651	10.7736	10.7561	10.9822	10.2825	-0.699631	0.0375033	MPDZ	multiple PDZ domain crumbs cell polarity complex component
ENSG00000165630	PRPF18	pre-mRNA processing factor 18	9.293	9.05943	9.25265	8.97982	9.11983	9.15426	9.04896	9.47268	9.25464	9.48035	9.14237	9.48178	9.3494	9.53528	9.35003	8.9711	9.12971	9.33751	0.207809	0.0375197	PRPF18	pre-mRNA processing factor 18
ENSG00000153187	HNRNPU	heterogeneous nuclear ribonucleoprotein U	12.5388	12.5866	12.6743	12.322	12.7183	12.4392	12.8067	13.7129	12.5749	12.8306	12.6248	12.7953	12.9512	13.166	12.5903	12.874	12.5837	12.9022	0.31852	0.0375408	HNRNPU	heterogeneous nuclear ribonucleoprotein U
ENSG00000188917	TRMT2B	tRNA methyltransferase 2 homolog B	8.93322	8.23456	8.5114	7.86298	7.41521	8.55638	7.88684	8.09929	7.86976	7.13032	8.13707	7.87742	7.53286	7.41785	7.86084	8.13208	8.20009	7.78416	-0.415921	0.0376849	TRMT2B	tRNA methyltransferase 2 homolog B
ENSG00000147570	DNAJC5B	DnaJ heat shock protein family (Hsp40) member C5 beta	3.05829	2.75508	3.98673	5.6244	3.83009	3.07639	3.42361	0	2.8337	0	3.24091	2.05309	0	3.58496	3.86941	0	3.67923	1.73134	-1.94788	0.0376978	DNAJC5B	DnaJ heat shock protein family (Hsp40) member C5 beta
ENSG00000162522	KIAA1522	KIAA1522	9.46079	9.19584	9.22382	9.04727	9.09096	9.36142	9.25956	9.37342	9.04186	8.39094	9.03021	8.7602	8.78918	8.90087	8.78961	9.26131	9.23424	8.9264	-0.307837	0.0377062	KIAA1522	KIAA1522
ENSG00000172403	SYNPO2	synaptopodin 2	9.66853	8.82709	8.74784	10.6157	9.02231	8.70086	10.0073	8.94223	8.51442	9.1414	9.60787	7.94659	6.56612	8.40088	9.25678	9.04931	9.36994	8.60285	-0.76709	0.0377389	SYNPO2	synaptopodin 2
ENSG00000170791	CHCHD7	coiled-coil-helix-coiled-coil-helix domain containing 7	8.24002	7.39039	8.23737	9.03747	8.92428	7.9662	8.69723	9.10396	9.20056	9.00709	8.72688	8.8184	8.68833	9.66711	8.2407	8.62031	8.35614	8.89704	0.540901	0.0377474	CHCHD7	coiled-coil-helix-coiled-coil-helix domain containing 7
ENSG00000279122	AC020763.2	---	0	0	0	0	0	0	0	1.51221	2.02308	2.63908	0	2.05309	0	0	0	2.16809	0	1.15506	1.15506	0.0377983	AC020763.2	---
ENSG00000130338	TULP4	tubby like protein 4	8.72963	8.74438	8.93186	8.44032	8.90783	8.9987	8.75974	8.65458	8.24491	8.84919	8.41558	8.34627	8.68833	7.90087	8.04742	8.80446	8.78749	8.43907	-0.348424	0.0378066	TULP4	tubby like protein 4
ENSG00000183617	MRPL54	mitochondrial ribosomal protein L54	9.21012	9.42071	9.18753	9.7753	9.78544	9.24249	9.71046	9.54064	9.87458	10.5251	9.32806	9.93757	9.68658	9.77808	9.59285	10.1417	9.47601	9.82279	0.346786	0.0378089	MRPL54	mitochondrial ribosomal protein L54
ENSG00000168229	PTGDR	prostaglandin D2 receptor	2.34259	3.17812	2.71591	6.66164	4.59331	4.94205	3.68846	0	4.19893	2.0488	3.35366	2.64384	4.49645	0	3.77007	3.3671	4.01744	2.65321	-1.36423	0.0378261	PTGDR	prostaglandin D2 receptor
ENSG00000186104	CYP2R1	cytochrome P450 family 2 subfamily R member 1	7.37789	7.43901	7.67459	7.885	8.17286	7.93001	8.16199	7.58349	7.83146	7.7509	7.44228	7.45366	7.37597	7.36632	7.42764	7.34786	7.80591	7.50884	-0.297068	0.0378776	CYP2R1	cytochrome P450 family 2 subfamily R member 1
ENSG00000278259	MYO19	myosin XIX	9.00358	8.92592	8.93186	8.67323	9.23774	8.97402	9.32425	9.61239	9.89639	10.2983	8.77323	9.85819	9.26242	9.09803	8.97111	8.75864	9.01009	9.39207	0.381988	0.0379074	MYO19	myosin XIX
ENSG00000173465	SSSCA1	Sjogren syndrome/scleroderma autoantigen 1	7.52549	6.78486	6.94885	7.17193	7.90089	6.60962	7.13408	7.79079	7.60796	8.37739	7.09024	7.89661	7.39743	8.57365	7.06862	7.18418	7.15367	7.66521	0.511535	0.0379143	SSSCA1	Sjogren syndrome/scleroderma autoantigen 1
ENSG00000141469	SLC14A1	solute carrier family 14 member 1 (Kidd blood group)	3.05829	3.50482	5.44969	6.79553	4.38084	4.75609	3.80463	3.5987	4.3511	3.86753	4.09923	4.97497	3.91692	3.45943	4.28377	3.52141	4.5357	4.00812	-0.527582	0.0379243	SLC14A1	solute carrier family 14 member 1 (Kidd blood group)
ENSG00000107651	SEC23IP	SEC23 interacting protein	9.92693	9.9038	10.2602	10.2872	10.3711	10.4576	10.2288	10.8283	10.4643	11.0341	10.1654	10.7999	10.4382	11.128	10.2137	9.83448	10.2051	10.5452	0.34007	0.0379428	SEC23IP	SEC23 interacting protein
ENSG00000177614	PGBD5	piggyBac transposable element derived 5	9.24926	9.10534	8.31091	6.78386	6.49587	8.02229	7.57136	8.96112	6.88841	6.77835	7.15391	6.62423	7.07231	6.84549	7.3176	7.16089	7.93413	7.20026	-0.733872	0.0379498	PGBD5	piggyBac transposable element derived 5
ENSG00000072849	DERL2	derlin 2	9.98141	10.5973	9.91382	10.1888	10.3675	9.84233	10.6222	10.8789	10.2786	10.3809	9.99989	10.3289	10.8944	11.0458	10.6154	10.803	10.2162	10.5806	0.364444	0.0379814	DERL2	derlin 2
[truncated: 34,815 more rows]
