# Supplementary material for: Combined Analysis of Expression Profiles in a Mouse Model and Patients Identified BHMT2 as a New Regulator of Lipid Metabolism in Metabolic-Associated Fatty Liver Disease
Source: Front Cell Dev Biol. 2021 Nov 11;9:741710. doi: 10.3389/fcell.2021.741710 (PMC8636031; doi:10.3389/fcell.2021.741710)
Supplement: Supplementary file 2 [file Table3.XLSX]

## Sheet: Sheet1
Table S3.Overlapping genes (log2foldchange≥0.5 or ≤-0.5)
Gene_ID	Gene Symbol（human）	description	Average of Patients(G1)	Average of Controls (G2)	G2_vs_G1_log2FoldChange	G2_vs_G1_Pvalue
ENSG00000095596	CYP26A1	cytochrome P450 family 26 subfamily A member 1	6.3347	8.4241	2.0894	0.00248266
ENSG00000104369	JPH1	junctophilin 1	3.23071	5.17688	1.94617	0.00228511
ENSG00000219607	PPP1R3G	protein phosphatase 1 regulatory subunit 3G	4.33768	5.91554	1.57786	0.000479762
ENSG00000130222	GADD45G	growth arrest and DNA damage inducible gamma	7.5758	9.14951	1.57372	0.000129198
ENSG00000136689	IL1RN	interleukin 1 receptor antagonist	8.9695	10.3757	1.40621	0.0213579
ENSG00000139514	SLC7A1	solute carrier family 7 member 1	7.43585	8.75091	1.31506	0.00311473
ENSG00000183570	PCBP3	poly(rC) binding protein 3	4.24836	5.52906	1.28071	0.00157318
ENSG00000137496	IL18BP	interleukin 18 binding protein	8.16605	9.38456	1.21851	0.00453346
ENSG00000115457	IGFBP2	insulin like growth factor binding protein 2	10.951	12.1276	1.17661	0.000177163
ENSG00000173156	RHOD	ras homolog family member D	9.58537	10.7388	1.15339	2.11e-06
ENSG00000135094	SDS	serine dehydratase	11.3491	12.4867	1.13759	0.00939825
ENSG00000006327	TNFRSF12A	TNF receptor superfamily member 12A	8.35339	9.4639	1.11051	0.00808887
ENSG00000104213	PDGFRL	platelet derived growth factor receptor like	4.54387	5.6481	1.10423	0.00924324
ENSG00000123689	G0S2	G0/G1 switch 2	10.6039	11.7	1.09607	0.0213675
ENSG00000183853	KIRREL1	kirre like nephrin family adhesion molecule 1	7.68649	8.75159	1.0651	0.001936
ENSG00000143333	RGS16	regulator of G protein signaling 16	6.61042	7.66642	1.056	0.00590967
ENSG00000157765	SLC34A2	solute carrier family 34 member 2	5.93013	6.96666	1.03653	0.00921065
ENSG00000144136	SLC20A1	solute carrier family 20 member 1	9.43824	10.4722	1.03399	0.00101607
ENSG00000132329	RAMP1	receptor activity modifying protein 1	7.46904	8.4486	0.979556	0.000866672
ENSG00000197208	SLC22A4	solute carrier family 22 member 4	4.23092	5.20963	0.97871	0.00664996
ENSG00000153823	PID1	phosphotyrosine interaction domain containing 1	9.27604	10.2304	0.954309	0.0438218
ENSG00000275183	LENG9	leukocyte receptor cluster member 9	5.93676	6.8453	0.908535	0.0118354
ENSG00000138074	SLC5A6	solute carrier family 5 member 6	10.4894	11.3635	0.874139	0.0254023
ENSG00000184557	SOCS3	suppressor of cytokine signaling 3	10.4957	11.3521	0.856394	0.0176283
ENSG00000090339	ICAM1	intercellular adhesion molecule 1	11.1533	12.0044	0.851128	0.0214985
ENSG00000176402	GJC3	gap junction protein gamma 3	3.78582	4.60483	0.819007	0.0194155
ENSG00000158716	DUSP23	dual specificity phosphatase 23	9.50676	10.3127	0.805918	0.00108205
ENSG00000140332	TLE3	transducin like enhancer of split 3	7.94622	8.73906	0.792845	0.00748186
ENSG00000120129	DUSP1	dual specificity phosphatase 1	11.5202	12.2694	0.749177	0.0289005
ENSG00000276547	PCDHGB5	protocadherin gamma subfamily B, 5	7.25056	7.99529	0.744727	0.0208401
ENSG00000135245	HILPDA	hypoxia inducible lipid droplet associated	6.74354	7.48474	0.741206	0.0110341
ENSG00000180875	GREM2	gremlin 2, DAN family BMP antagonist	9.40621	10.1308	0.724599	0.0446069
ENSG00000158882	TOMM40L	translocase of outer mitochondrial membrane 40 like	8.07257	8.79626	0.723684	0.0469549
ENSG00000278615	C11orf98	chromosome 11 open reading frame 98	8.06523	8.76685	0.701619	0.00452821
ENSG00000069399	BCL3	B-cell CLL/lymphoma 3	9.65578	10.332	0.676217	0.00232816
ENSG00000089351	GRAMD1A	GRAM domain containing 1A	8.93929	9.59913	0.659841	0.0147396
ENSG00000107968	MAP3K8	mitogen-activated protein kinase kinase kinase 8	8.47292	9.13139	0.658464	0.0496972
ENSG00000160326	SLC2A6	solute carrier family 2 member 6	6.12436	6.76921	0.64485	0.0459389
ENSG00000183696	UPP1	uridine phosphorylase 1	8.03676	8.67076	0.633999	0.014561
ENSG00000140287	HDC	histidine decarboxylase	5.02609	5.64733	0.621238	0.0419549
ENSG00000137193	PIM1	Pim-1 proto-oncogene, serine/threonine kinase	10.0469	10.6674	0.620557	0.0321864
ENSG00000172432	GTPBP2	GTP binding protein 2	9.42391	9.99601	0.572097	0.0278491
ENSG00000144655	CSRNP1	cysteine and serine rich nuclear protein 1	9.6795	10.2464	0.566923	0.0464235
ENSG00000198355	PIM3	Pim-3 proto-oncogene, serine/threonine kinase	10.1318	10.6887	0.556923	0.012247
ENSG00000136908	DPM2	dolichyl-phosphate mannosyltransferase subunit 2, regulatory	8.4403	8.98639	0.546095	0.00647376
ENSG00000196136	SERPINA3	serpin family A member 3	17.6555	18.1975	0.541989	0.0195717
ENSG00000136770	DNAJC1	DnaJ heat shock protein family (Hsp40) member C1	10.6995	11.2287	0.529194	0.00270676
ENSG00000108639	SYNGR2	synaptogyrin 2	9.97199	10.4885	0.516511	0.000545335
ENSG00000148339	SLC25A25	solute carrier family 25 member 25	10.4819	10.9975	0.515591	0.0402482
ENSG00000179104	TMTC2	transmembrane and tetratricopeptide repeat containing 2	6.45521	6.96918	0.513969	0.0173243
ENSG00000141298	SSH2	slingshot protein phosphatase 2	9.26397	8.76133	-0.502645	0.00427225
ENSG00000120896	SORBS3	sorbin and SH3 domain containing 3	9.96946	9.46132	-0.508139	0.0388693
ENSG00000111110	PPM1H	protein phosphatase, Mg2+/Mn2+ dependent 1H	8.80341	8.27937	-0.524043	0.0086483
ENSG00000166206	GABRB3	gamma-aminobutyric acid type A receptor beta3 subunit	6.7048	6.17957	-0.525234	0.01184
ENSG00000141469	SLC14A1	solute carrier family 14 member 1 (Kidd blood group)	4.5357	4.00812	-0.527582	0.0379243
ENSG00000122507	BBS9	Bardet-Biedl syndrome 9	7.63739	7.10358	-0.53381	0.0238825
ENSG00000164626	KCNK5	potassium two pore domain channel subfamily K member 5	8.98154	8.44414	-0.537401	0.0241888
ENSG00000173597	SULT1B1	sulfotransferase family 1B member 1	11.3044	10.7667	-0.537618	0.0307666
ENSG00000205683	DPF3	double PHD fingers 3	6.40879	5.86499	-0.543806	0.0230753
ENSG00000089041	P2RX7	purinergic receptor P2X 7	7.39874	6.8498	-0.548934	0.0225454
ENSG00000077420	APBB1IP	amyloid beta precursor protein binding family B member 1 interacting protein	10.8676	10.3176	-0.550022	0.0336722
ENSG00000115540	MOB4	MOB family member 4, phocein	9.79809	9.24494	-0.553145	0.000528889
ENSG00000172728	FUT10	fucosyltransferase 10	7.09203	6.53557	-0.556451	0.0289955
ENSG00000183323	CCDC125	coiled-coil domain containing 125	9.04927	8.48584	-0.563429	0.0241822
ENSG00000132840	BHMT2	betaine--homocysteine S-methyltransferase 2	12.81	12.244	-0.565994	0.0471044
ENSG00000117643	MAN1C1	mannosidase alpha class 1C member 1	9.70903	9.14258	-0.566445	0.0448922
ENSG00000162512	SDC3	syndecan 3	10.5294	9.95818	-0.571185	0.0338898
ENSG00000196562	SULF2	sulfatase 2	10.8328	10.2453	-0.587566	0.0429238
ENSG00000133302	SLF1	SMC5-SMC6 complex localization factor 1	7.27012	6.66211	-0.608009	0.00920557
ENSG00000052802	MSMO1	methylsterol monooxygenase 1	13.0133	12.4049	-0.608422	0.0310369
ENSG00000111785	RIC8B	RIC8 guanine nucleotide exchange factor B	8.3923	7.78332	-0.608979	0.0074158
ENSG00000160255	ITGB2	integrin subunit beta 2	10.4246	9.81336	-0.611199	0.0269503
ENSG00000135905	DOCK10	dedicator of cytokinesis 10	9.32834	8.70373	-0.624612	0.0259171
ENSG00000092421	SEMA6A	semaphorin 6A	8.90832	8.25936	-0.64896	0.00966155
ENSG00000110077	MS4A6A	membrane spanning 4-domains A6A	10.8563	10.2	-0.656394	0.0365123
ENSG00000169499	PLEKHA2	pleckstrin homology domain containing A2	9.26968	8.60366	-0.666025	0.0080673
ENSG00000091428	RAPGEF4	Rap guanine nucleotide exchange factor 4	8.97153	8.3032	-0.66834	0.0284629
ENSG00000165092	ALDH1A1	aldehyde dehydrogenase 1 family member A1	13.5715	12.8877	-0.683758	0.029836
ENSG00000119431	HDHD3	haloacid dehalogenase like hydrolase domain containing 3	9.62526	8.93915	-0.686107	0.00358079
ENSG00000145020	AMT	aminomethyltransferase	8.09593	7.40399	-0.691943	0.0347803
ENSG00000103066	PLA2G15	phospholipase A2 group XV	8.02498	7.33077	-0.694213	0.00116324
ENSG00000168792	ABHD15	abhydrolase domain containing 15	9.08859	8.36375	-0.724842	0.0416909
ENSG00000107331	ABCA2	ATP binding cassette subfamily A member 2	9.49142	8.7531	-0.738314	0.0128014
ENSG00000049769	PPP1R3F	protein phosphatase 1 regulatory subunit 3F	6.53902	5.7938	-0.745219	0.0452952
ENSG00000108984	MAP2K6	mitogen-activated protein kinase kinase 6	6.89535	6.13174	-0.763614	0.0431364
ENSG00000151470	C4orf33	chromosome 4 open reading frame 33	8.04844	7.27548	-0.772956	0.00147086
ENSG00000203747	FCGR3A	Fc fragment of IgG receptor IIIa	12.0482	11.2748	-0.773328	0.01372
ENSG00000184979	USP18	ubiquitin specific peptidase 18	7.48611	6.70954	-0.776564	0.0365775
ENSG00000100344	PNPLA3	patatin like phospholipase domain containing 3	8.80165	8.01533	-0.786317	0.00622826
ENSG00000198901	PRC1	protein regulator of cytokinesis 1	6.4122	5.59584	-0.816358	0.00516801
ENSG00000146233	CYP39A1	cytochrome P450 family 39 subfamily A member 1	9.39231	8.56695	-0.825361	0.049324
ENSG00000136108	CKAP2	cytoskeleton associated protein 2	7.93529	7.10374	-0.831551	0.0172885
ENSG00000172264	MACROD2	MACRO domain containing 2	6.38051	5.52212	-0.858396	0.0179501
ENSG00000143195	ILDR2	immunoglobulin like domain containing receptor 2	6.41467	5.54193	-0.872736	0.0360955
ENSG00000144115	THNSL2	threonine synthase like 2	10.1451	9.2639	-0.881228	0.0302435
ENSG00000242265	PEG10	paternally expressed 10	6.28083	5.39556	-0.885275	0.0340674
ENSG00000111199	TRPV4	transient receptor potential cation channel subfamily V member 4	8.21231	7.30667	-0.905647	0.00389123
ENSG00000132837	DMGDH	dimethylglycine dehydrogenase	11.5688	10.6568	-0.911947	0.0479375
ENSG00000139547	RDH16	retinol dehydrogenase 16 (all-trans)	12.9314	12.0185	-0.912949	0.016231
ENSG00000036530	CYP46A1	cytochrome P450 family 46 subfamily A member 1	5.10428	4.16681	-0.937472	0.0494486
ENSG00000170312	CDK1	cyclin dependent kinase 1	5.57515	4.61755	-0.957604	0.0159149
ENSG00000089127	OAS1	2-5-oligoadenylate synthetase 1	9.93784	8.95566	-0.982176	0.00101843
ENSG00000180998	GPR137C	G protein-coupled receptor 137C	5.51408	4.51747	-0.996608	0.0244548
ENSG00000069424	KCNAB2	potassium voltage-gated channel subfamily A regulatory beta subunit 2	8.38192	7.36372	-1.01821	0.0227406
ENSG00000187017	ESPN	espin	9.2157	8.18656	-1.02914	0.000158799
ENSG00000080573	COL5A3	collagen type V alpha 3 chain	9.16855	8.13928	-1.02927	0.00294757
ENSG00000119125	GDA	guanine deaminase	9.36706	8.28598	-1.08108	0.00163719
ENSG00000154864	PIEZO2	piezo type mechanosensitive ion channel component 2	9.61098	8.52974	-1.08124	0.00178783
ENSG00000004799	PDK4	pyruvate dehydrogenase kinase 4	11.7309	10.6089	-1.12203	0.0024096
ENSG00000101447	FAM83D	family with sequence similarity 83 member D	6.99216	5.84725	-1.14492	0.00502171
ENSG00000155659	VSIG4	V-set and immunoglobulin domain containing 4	11.0247	9.87779	-1.14693	0.002087
ENSG00000146070	PLA2G7	phospholipase A2 group VII	7.86902	6.69618	-1.17284	0.013276
ENSG00000198650	TAT	tyrosine aminotransferase	14.5216	13.3271	-1.1945	0.010578
ENSG00000241119	UGT1A9	UDP glucuronosyltransferase family 1 member A9	10.2081	8.97223	-1.23587	0.00974468
ENSG00000113790	EHHADH	enoyl-CoA hydratase and 3-hydroxyacyl CoA dehydrogenase	13.1203	11.8727	-1.24755	0.00726029
ENSG00000171747	LGALS4	galectin 4	10.1592	8.83907	-1.32015	0.000109752
ENSG00000165810	BTNL9	butyrophilin like 9	7.65239	6.27119	-1.3812	0.0120926
ENSG00000198203	SULT1C2	sulfotransferase family 1C member 2	4.36571	2.96233	-1.40339	0.00163626
ENSG00000143845	ETNK2	ethanolamine kinase 2	11.0526	9.64768	-1.40496	0.00346675
ENSG00000111186	WNT5B	Wnt family member 5B	4.52196	3.11305	-1.40891	0.0336947
ENSG00000198829	SUCNR1	succinate receptor 1	8.64882	7.18484	-1.46399	0.0155452
ENSG00000197408	CYP2B6	cytochrome P450 family 2 subfamily B member 6	9.25294	7.73066	-1.52228	0.0113178
ENSG00000105989	WNT2	Wnt family member 2	5.4705	3.9308	-1.53971	0.00849711
ENSG00000166803	PCLAF	PCNA clamp associated factor	5.13718	3.5432	-1.59398	0.0186644
ENSG00000143627	PKLR	pyruvate kinase, liver and RBC	9.74415	8.07533	-1.66882	0.0195069
ENSG00000187048	CYP4A11	cytochrome P450 family 4 subfamily A member 11	11.6835	9.97831	-1.7052	0.00150121
ENSG00000255974	CYP2A6	cytochrome P450 family 2 subfamily A member 6	10.7098	9.00353	-1.70623	0.00528135
ENSG00000164237	CMBL	carboxymethylenebutenolidase homolog	11.0227	9.31626	-1.70645	0.00094886
ENSG00000165682	CLEC1B	C-type lectin domain family 1 member B	10.1701	8.41239	-1.75767	2.04e-06
ENSG00000135218	CD36	CD36 molecule	11.5563	9.61901	-1.9373	5.6e-05
ENSG00000196549	MME	membrane metalloendopeptidase	10.1479	8.18144	-1.96648	0.00936723
ENSG00000152779	SLC16A12	solute carrier family 16 member 12	4.48954	2.50043	-1.98911	3.24e-05
ENSG00000161682	FAM171A2	family with sequence similarity 171 member A2	3.14417	1.14951	-1.99466	0.0202997
ENSG00000196482	ESRRG	estrogen related receptor gamma	4.77254	2.38946	-2.38308	0.00773937
