# Supplementary material for: Combined Analysis of Expression Profiles in a Mouse Model and Patients Identified BHMT2 as a New Regulator of Lipid Metabolism in Metabolic-Associated Fatty Liver Disease
Source: Front Cell Dev Biol. 2021 Nov 11;9:741710. doi: 10.3389/fcell.2021.741710 (PMC8636031; doi:10.3389/fcell.2021.741710)
Supplement: Supplementary file 3 [file Table9.XLSX]

## Sheet: Sheet1
Table S9.RNAseq data of liver tissues of MAFLD patients and controls in GSE63067(p<0.05).
ID	adj.P.Val	P.Value	t	B	logFC	Gene.symbol	Gene.title
225338_at	0.505	0.00657009	3.09932	-2.2485	0.435156	ZYG11B	zyg-11 family member B, cell cycle regulator
228330_at	0.596	0.0350119	2.29284	-3.5292	0.426568	ZUFSP	zinc finger with UFM1 specific peptidase domain
214867_at	0.578	0.0240608	2.4791	-3.2441	0.231604	ZSWIM8-AS1///NDST2	ZSWIM8 antisense RNA 1///N-deacetylase and N-sulfotransferase 2
218937_at	0.623	0.049184	2.11983	-3.7851	0.258634	ZSCAN32	zinc finger and SCAN domain containing 32
228125_at	0.5	0.0040693	-3.32272	-1.8809	-0.214156	ZSCAN30	zinc finger and SCAN domain containing 30
213218_at	0.556	0.0141339	-2.73692	-2.837	-0.274392	ZSCAN26	zinc finger and SCAN domain containing 26
242621_at	0.507	0.00677116	3.0852	-2.2716	0.324023	ZSCAN25	zinc finger and SCAN domain containing 25
234530_s_at	0.572	0.021509	-2.53399	-3.1586	-0.180787	ZNRD1	zinc ribbon domain containing 1
213444_at	0.428	0.00164794	-3.74137	-1.1915	-0.42209	ZNF862	zinc finger protein 862
226323_at	0.602	0.0370417	2.26446	-3.5718	0.171649	ZNF830	zinc finger protein 830
238436_s_at	0.5	0.00590895	3.14894	-2.167	0.533631	ZNF805	zinc finger protein 805
214901_at	0.496	0.00354779	3.3864	-1.7759	0.260282	ZNF8	zinc finger protein 8
228364_at	0.557	0.0159196	-2.6798	-2.9282	-0.260249	ZNF784	zinc finger protein 784
239441_at	0.581	0.0263137	-2.43504	-3.3124	-0.194526	ZNF780A	zinc finger protein 780A
228652_at	0.602	0.036793	2.26786	-3.5667	0.333633	ZNF776	zinc finger protein 776
213542_at	0.576	0.0225699	2.51046	-3.1953	0.23761	ZNF710	zinc finger protein 710
227132_at	0.504	0.00642904	3.10948	-2.2318	0.299817	ZNF706	zinc finger protein 706
223366_at	0.604	0.0373712	-2.25999	-3.5785	-0.218194	ZNF704	zinc finger protein 704
243816_at	0.577	0.022695	-2.50775	-3.1995	-0.170166	ZNF70	zinc finger protein 70
234914_at	0.5	0.0045688	-3.26888	-1.9696	-0.169817	ZNF7	zinc finger protein 7
1553702_at	0.613	0.0407254	-2.21645	-3.6433	-0.182468	ZNF697	zinc finger protein 697
220661_s_at	0.591	0.0328842	-2.32428	-3.4817	-0.351462	ZNF692	zinc finger protein 692
238962_at	0.619	0.0474972	-2.13781	-3.759	-0.122484	ZNF681	zinc finger protein 681
241972_at	0.591	0.0332298	2.31905	-3.4896	0.25825	ZNF674-AS1	ZNF674 antisense RNA 1 (head to head)
1554726_at	0.476	0.00301022	3.46258	-1.6502	0.422878	ZNF655	zinc finger protein 655
241348_at	0.61	0.0402356	2.2226	-3.6342	0.418469	ZNF654	zinc finger protein 654
1554958_at	0.552	0.0126402	-2.79031	-2.7512	-0.222371	ZNF641	zinc finger protein 641
227822_at	0.567	0.0199986	-2.56946	-3.1029	-0.348413	ZNF605	zinc finger protein 605
232641_at	0.578	0.0233254	-2.49433	-3.2205	-0.273067	ZNF596	zinc finger protein 596
210062_s_at	0.616	0.0443491	-2.17299	-3.7075	-0.158045	ZNF589	zinc finger protein 589
229328_at	0.623	0.0495747	-2.11575	-3.791	-0.168102	ZNF571-AS1	ZNF571 antisense RNA 1
1552770_s_at	0.556	0.0135176	-2.75826	-2.8028	-0.187928	ZNF563	zinc finger protein 563
1553286_at	0.582	0.0291256	-2.38478	-3.3896	-0.189869	ZNF555	zinc finger protein 555
1553718_at	0.617	0.0447184	-2.16875	-3.7137	-0.351459	ZNF548	zinc finger protein 548
244466_at	0.617	0.0447248	-2.16867	-3.7138	-0.150636	ZNF544	zinc finger protein 544
226327_at	0.551	0.0122873	-2.80381	-2.7295	-0.303776	ZNF507	zinc finger protein 507
235928_at	0.609	0.0395159	-2.23175	-3.6206	-0.132922	ZNF503-AS2	ZNF503 antisense RNA 2
232393_at	0.582	0.0271622	2.41937	-3.3365	0.174582	ZNF462	zinc finger protein 462
207304_at	0.556	0.0136263	2.75443	-2.8089	0.25106	ZNF45	zinc finger protein 45
228968_at	0.611	0.0403748	-2.22084	-3.6368	-0.307165	ZNF449	zinc finger protein 449
223968_at	0.614	0.0419347	-2.20156	-3.6654	-0.18341	ZNF44	zinc finger protein 44
229133_s_at	0.613	0.0410164	-2.21283	-3.6487	-0.164829	ZNF397	zinc finger protein 397
214714_at	0.556	0.0135921	2.75563	-2.807	0.372816	ZNF394	zinc finger protein 394
234409_at	0.469	0.00246876	-3.5544	-1.4989	-0.179364	ZNF354C	zinc finger protein 354C
237061_at	0.606	0.0380327	-2.25112	-3.5917	-0.149298	ZNF347	zinc finger protein 347
236267_at	0.507	0.00689116	-3.07697	-2.2851	-0.238588	ZNF346	zinc finger protein 346
219801_at	0.609	0.0389735	2.23876	-3.6102	0.205448	ZNF34	zinc finger protein 34
1552375_at	0.607	0.0382648	-2.24805	-3.5963	-0.138267	ZNF333	zinc finger protein 333
209814_at	0.557	0.0147455	2.71661	-2.8695	0.257705	ZNF330	zinc finger protein 330
227980_at	0.579	0.02467	-2.46682	-3.2632	-0.315548	ZNF322	zinc finger protein 322
236551_at	0.286	5.403e-05	-5.35649	1.3087	-0.294066	ZNF311	zinc finger protein 311
232014_at	0.58	0.025537	-2.44982	-3.2895	-0.2651	ZNF30	zinc finger protein 30
219605_at	0.59	0.0315833	-2.34446	-3.4511	-0.148812	ZNF3	zinc finger protein 3
227077_at	0.617	0.0449346	-2.16628	-3.7173	-0.253456	ZNF286B///ZNF286A	zinc finger protein 286B///zinc finger protein 286A
239462_at	0.5	0.00626836	-3.12133	-2.2124	-0.233562	ZNF284	zinc finger protein 284
238030_at	0.591	0.0332239	-2.31914	-3.4895	-0.381828	ZNF268	zinc finger protein 268
214686_at	0.581	0.0264618	2.43227	-3.3166	0.473412	ZNF266	zinc finger protein 266
226754_at	0.389	0.00051627	-4.27994	-0.3201	-0.284158	ZNF251	zinc finger protein 251
219123_at	0.582	0.0276414	-2.41071	-3.3498	-0.368588	ZNF232	zinc finger protein 232
205791_x_at	0.591	0.0338203	2.31022	-3.503	0.236608	ZNF230	zinc finger protein 230
207125_at	0.613	0.0407363	2.21632	-3.6435	0.144586	ZNF225	zinc finger protein 225
207338_s_at	0.582	0.0281159	2.40229	-3.3628	0.436226	ZNF200	zinc finger protein 200
205855_at	0.556	0.0133761	-2.76328	-2.7947	-0.224705	ZNF197	zinc finger protein 197
213452_at	0.332	0.00023813	-4.64321	0.2493	-0.32171	ZNF184	zinc finger protein 184
207402_at	0.614	0.041892	-2.20208	-3.6646	-0.134115	ZNF132	zinc finger protein 132
1553979_at	0.617	0.0444132	2.17225	-3.7086	0.418568	ZNF121	zinc finger protein 121
1559881_s_at	0.617	0.0451743	2.16355	-3.7213	0.27201	ZNF12	zinc finger protein 12
207559_s_at	0.557	0.0155652	-2.69063	-2.911	-0.401245	ZMYM3	zinc finger MYM-type containing 3
212124_at	0.6	0.0361786	2.27635	-3.554	0.340785	ZMIZ1	zinc finger MIZ-type containing 1
211773_s_at	0.5	0.00442752	-3.2835	-1.9455	-0.266341	ZKSCAN3	zinc finger with KRAB and SCAN domains 3
207197_at	0.618	0.0456916	-2.15772	-3.7299	-0.131825	ZIC3	Zic family member 3
225218_at	0.557	0.0163507	2.66693	-2.9487	0.436739	ZFYVE27	zinc finger FYVE-type containing 27
213073_at	0.585	0.0295012	-2.37842	-3.3993	-0.349304	ZFYVE26	zinc finger FYVE-type containing 26
224445_s_at	0.5	0.00578968	-3.15847	-2.1514	-0.479451	ZFYVE21	zinc finger FYVE-type containing 21
225843_at	0.5	0.00534701	-3.1956	-2.0903	-0.400657	ZFYVE19	zinc finger FYVE-type containing 19
203651_at	0.5	0.0056948	3.16619	-2.1387	0.421825	ZFYVE16	zinc finger FYVE-type containing 16
224636_at	0.578	0.0239711	2.48094	-3.2413	0.337048	ZFP91	ZFP91 zinc finger protein
1555793_a_at	0.556	0.0143373	-2.73007	-2.8479	-0.241424	ZFP82	ZFP82 zinc finger protein
1569107_s_at	0.581	0.0264241	-2.43298	-3.3155	-0.17928	ZFP69	ZFP69 zinc finger protein
218968_s_at	0.378	0.00049036	-4.30397	-0.2819	-0.512132	ZFP64	ZFP64 zinc finger protein
201368_at	0.173	6.31e-06	6.44608	2.7535	1.02599	ZFP36L2	ZFP36 ring finger protein like 2
234300_s_at	0.556	0.01424	-2.73334	-2.8427	-0.146877	ZFP28	ZFP28 zinc finger protein
226807_at	0.579	0.0248085	-2.46406	-3.2675	-0.677426	ZFP1	ZFP1 zinc finger protein
229899_s_at	0.619	0.0473307	2.13962	-3.7563	0.3492	ZFAS1	ZNFX1 antisense RNA 1
221613_s_at	0.53	0.0100545	2.89905	-2.5754	0.460098	ZFAND6	zinc finger AN1-type containing 6
212764_at	0.578	0.0239694	2.48097	-3.2412	0.301216	ZEB1	zinc finger E-box binding homeobox 1
225744_at	0.557	0.0160948	-2.67453	-2.9366	-0.306328	ZDHHC8	zinc finger DHHC-type containing 8
222731_at	0.552	0.0127266	2.78706	-2.7565	0.679211	ZDHHC2	zinc finger DHHC-type containing 2
220618_s_at	0.5	0.00432398	-3.2945	-1.9274	-0.301707	ZCWPW1	zinc finger CW-type and PWWP domain containing 1
212423_at	0.579	0.0250882	2.45855	-3.276	0.530545	ZCCHC24	zinc finger CCHC-type containing 24
223163_s_at	0.507	0.00682744	-3.08132	-2.278	-0.339364	ZC3HC1	zinc finger C3HC-type containing 1
225634_at	0.599	0.0354763	-2.28621	-3.5392	-0.26847	ZC3HAV1	zinc finger CCCH-type containing, antiviral 1
206169_x_at	0.6	0.0360507	-2.27813	-3.5513	-0.26218	ZC3H7B	zinc finger CCCH-type containing 7B
226897_s_at	0.533	0.010324	2.88652	-2.5958	0.499636	ZC3H7A	zinc finger CCCH-type containing 7A
201595_s_at	0.533	0.0103467	2.88548	-2.5975	0.396926	ZC3H15	zinc finger CCCH-type containing 15
226163_at	0.578	0.0230135	-2.50093	-3.2102	-0.212633	ZBTB9	zinc finger and BTB domain containing 9
228970_at	0.59	0.0318669	2.33999	-3.4579	0.19509	ZBTB8OS	zinc finger and BTB domain containing 8 opposite strand
235142_at	0.556	0.0132409	2.76814	-2.7869	0.567683	ZBTB8A	zinc finger and BTB domain containing 8A
227358_at	0.528	0.0099831	-2.90242	-2.57	-0.205357	ZBTB46	zinc finger and BTB domain containing 46
204182_s_at	0.582	0.0276423	2.4107	-3.3498	0.374717	ZBTB43	zinc finger and BTB domain containing 43
226255_at	0.389	0.00060519	4.20586	-0.4383	0.674325	ZBTB33	zinc finger and BTB domain containing 33
220391_at	0.5	0.00469905	-3.2558	-1.9912	-0.219712	ZBTB3	zinc finger and BTB domain containing 3
233952_s_at	0.556	0.0136115	2.75494	-2.8081	1.02611	ZBTB21	zinc finger and BTB domain containing 21
226284_at	0.582	0.0276446	2.41066	-3.3499	0.31635	ZBTB2	zinc finger and BTB domain containing 2
213376_at	0.488	0.00335729	3.412	-1.7337	0.601117	ZBTB1	zinc finger and BTB domain containing 1
244758_at	0.556	0.0136769	-2.75265	-2.8118	-0.450323	ZBED9	zinc finger BED-type containing 9
220770_s_at	0.582	0.0288169	-2.39007	-3.3815	-0.248834	ZBED8	zinc finger BED-type containing 8
235010_at	0.556	0.0138929	-2.74516	-2.8238	-0.44091	ZBED5-AS1	ZBED5 antisense RNA 1
241423_at	0.599	0.0356283	-2.28406	-3.5424	-0.205315	ZBED3-AS1	ZBED3 antisense RNA 1
224268_x_at	0.588	0.03102	-2.35343	-3.4374	-0.203371	ZAN	zonadhesin (gene/pseudogene)
217836_s_at	0.476	0.00306415	3.45435	-1.6638	0.33157	YY1AP1	YY1 associated protein 1
212426_s_at	0.582	0.0285642	2.39444	-3.3748	0.241367	YWHAQ	tyrosine 3-monooxygenase/tryptophan 5-monooxygenase activation protein theta
222985_at	0.557	0.0145557	2.72283	-2.8595	0.304258	YWHAG	tyrosine 3-monooxygenase/tryptophan 5-monooxygenase activation protein gamma
222430_s_at	0.61	0.0400402	2.22507	-3.6306	0.510025	YTHDF2	YTH N6-methyladenosine RNA binding protein 2
227020_at	0.591	0.0329205	2.32373	-3.4825	1.03131	YPEL2	yippee like 2
202932_at	0.475	0.00294363	3.47295	-1.6331	0.547033	YES1	YES proto-oncogene 1, Src family tyrosine kinase
239208_s_at	0.508	0.00770846	-3.02436	-2.3712	-0.391915	YBEY	ybeY metallopeptidase (putative)
206238_s_at	0.496	0.00360324	3.3792	-1.7877	0.5633	YAF2	YY1 associated factor 2
232574_at	0.397	0.00083962	-4.05367	-0.683	-0.311172	XYLT1	xylosyltransferase 1
233878_s_at	0.614	0.0436867	2.18068	-3.6962	0.669215	XRN2	5'-3' exoribonuclease 2
223057_s_at	0.582	0.0289703	2.38744	-3.3855	0.173258	XPO5	exportin 5
220020_at	0.572	0.0212795	-2.53922	-3.1504	-0.254616	XPNPEP3	X-prolyl aminopeptidase 3
209375_at	0.389	0.00074997	-4.1061	-0.5984	-0.370844	XPC	XPC complex subunit, DNA damage recognition and repair factor
206366_x_at	0.59	0.0320241	2.33754	-3.4616	0.374799	XCL1	X-C motif chemokine ligand 1
242234_at	0.618	0.0460331	2.1539	-3.7355	0.296328	XAF1	XIAP associated factor 1
1554762_a_at	0.58	0.0258742	-2.44335	-3.2995	-0.205662	WWC2///CLDN22	WW and C2 domain containing 2///claudin 22
216074_x_at	0.592	0.0339398	2.30845	-3.5056	0.723448	WWC1	WW and C2 domain containing 1
201048_x_at	0.505	0.00658656	3.09815	-2.2504	0.403218	WTH3DI///RAB6A	RAB6C-like///RAB6A, member RAS oncogene family
229630_s_at	0.535	0.0106325	2.87256	-2.6184	0.783801	WTAP	Wilms tumor 1 associated protein
206067_s_at	0.562	0.0187642	-2.60039	-3.0542	-0.229018	WT1	Wilms tumor 1
210248_at	0.558	0.0175402	-2.63305	-3.0025	-0.257199	WNT7A	Wnt family member 7A
221029_s_at	0.551	0.0122427	-2.80554	-2.7267	-0.2138	WNT5B	Wnt family member 5B
232282_at	0.389	0.00071989	-4.12512	-0.5678	-1.37829	WNK3	WNK lysine deficient protein kinase 3
212051_at	0.61	0.0402027	2.22301	-3.6336	0.340943	WIPF2	WAS/WASL interacting protein family member 2
221248_s_at	0.602	0.0369096	-2.26626	-3.5691	-0.194139	WHSC1L1	Wolf-Hirschhorn syndrome candidate 1-like 1
228953_at	0.578	0.0230408	2.50035	-3.2111	0.563296	WHAMM	WAS protein homolog associated with actin, golgi membranes and microtubules
202908_at	0.578	0.0233242	-2.49436	-3.2204	-0.487308	WFS1	wolframin ER transmembrane glycoprotein
242204_at	0.582	0.0276634	2.41032	-3.3504	0.144172	WFDC5	WAP four-disulfide core domain 5
203892_at	0.58	0.0258214	-2.44436	-3.298	-0.250659	WFDC2	WAP four-disulfide core domain 2
219478_at	0.533	0.0102907	-2.88805	-2.5933	-0.372609	WFDC1	WAP four-disulfide core domain 1
227894_at	0.614	0.0429116	-2.18982	-3.6827	-0.172321	WDR90	WD repeat domain 90
229816_at	0.59	0.0316573	-2.34329	-3.4529	-0.188009	WDR78	WD repeat domain 78
227174_at	0.595	0.0348675	-2.29492	-3.5261	-0.538644	WDR72	WD repeat domain 72
214662_at	0.618	0.0459959	2.15431	-3.7349	0.564646	WDR43	WD repeat domain 43
226180_at	0.507	0.00762244	3.02963	-2.3626	0.61609	WDR36	WD repeat domain 36
238239_at	0.599	0.0354123	-2.28712	-3.5378	-0.150624	WDR27	WD repeat domain 27
224898_at	0.522	0.0096141	2.92023	-2.541	0.483569	WDR26	WD repeat domain 26
207628_s_at	0.599	0.0357538	-2.28229	-3.5451	-0.238794	WBSCR22	Williams-Beuren syndrome chromosome region 22
218766_s_at	0.579	0.0245565	2.46908	-3.2597	0.201205	WARS2	tryptophanyl tRNA synthetase 2, mitochondrial
212267_at	0.525	0.009825	2.90997	-2.5577	0.406311	WAPL	WAPL cohesin release factor
242957_at	0.451	0.00189056	-3.67785	-1.2958	-0.838463	VWCE	von Willebrand factor C and EGF domains
232642_at	0.427	0.00156643	-3.76484	-1.1531	-0.265225	VWA5B2	von Willebrand factor A domain containing 5B2
223021_x_at	0.576	0.0225491	2.51091	-3.1946	0.39584	VTA1	vesicle trafficking 1
244057_s_at	0.614	0.0416033	-2.2056	-3.6594	-0.176081	VSTM4	V-set and transmembrane domain containing 4
1559108_at	0.617	0.0455101	-2.15976	-3.7269	-0.122623	VPS53	VPS53, GARP complex subunit
218171_at	0.5	0.00492818	3.23362	-2.0277	0.41442	VPS4B	vacuolar protein sorting 4 homolog B
201807_at	0.579	0.024634	2.46753	-3.2621	0.255891	VPS26A	VPS26, retromer complex component A
213686_at	0.572	0.0210644	2.54417	-3.1426	0.235036	VPS13A	vacuolar protein sorting 13 homolog A
208091_s_at	0.539	0.0111771	2.84886	-2.6568	0.435432	VOPP1	vesicular, overexpressed in cancer, prosurvival protein 1
1553514_a_at	0.522	0.00946505	2.92762	-2.529	0.874945	VNN3	vanin 3
205922_at	0.578	0.022839	2.50465	-3.2044	0.958995	VNN2	vanin 2
1558549_s_at	0.532	0.0102214	2.89125	-2.5881	0.901942	VNN1	vanin 1
224881_at	0.562	0.0188104	2.5992	-3.056	0.43812	VKORC1L1	vitamin K epoxide reductase complex subunit 1 like 1
223209_s_at	0.591	0.0333475	2.31728	-3.4923	0.206512	VIMP	VCP interacting membrane selenoprotein
223090_x_at	0.576	0.0224317	2.51346	-3.1906	0.306325	VEZT	vezatin, adherens junctions transmembrane protein
202171_at	0.485	0.00325438	3.42644	-1.7098	0.663505	VEZF1	vascular endothelial zinc finger 1
210512_s_at	0.591	0.0327173	2.32683	-3.4779	0.471049	VEGFA	vascular endothelial growth factor A
204254_s_at	0.557	0.0154018	2.6957	-2.9029	0.475829	VDR	vitamin D (1,25- dihydroxyvitamin D3) receptor
234988_at	0.607	0.0382936	2.24767	-3.5969	0.28945	VCPIP1	valosin containing protein interacting protein 1
225198_at	0.504	0.00642357	3.10988	-2.2311	0.700388	VAPA	VAMP associated protein A
226029_at	0.615	0.0440535	-2.17641	-3.7025	-0.146462	VANGL2	VANGL planar cell polarity protein 2
202829_s_at	0.614	0.0430575	2.18809	-3.6853	0.200049	VAMP7	vesicle associated membrane protein 7
201557_at	0.592	0.0339525	-2.30827	-3.5059	-0.308624	VAMP2	vesicle associated membrane protein 2
218715_at	0.621	0.0482989	-2.12919	-3.7715	-0.200407	UTP6	UTP6, small subunit processome component
209486_at	0.52	0.00920537	2.94076	-2.5076	0.717841	UTP3	UTP3, small subunit processome component homolog (S. cerevisiae)
228050_at	0.617	0.0444915	2.17135	-3.7099	0.369819	UTP15	UTP15, small subunit processome component
204190_at	0.617	0.0453616	-2.16143	-3.7244	-0.395967	USPL1	ubiquitin specific peptidase like 1
201099_at	0.5	0.00400167	3.33051	-1.8681	0.589088	USP9X	ubiquitin specific peptidase 9, X-linked
223701_s_at	0.522	0.00963266	2.91932	-2.5425	0.580306	USP47	ubiquitin specific peptidase 47
225085_at	0.614	0.0417522	-2.20378	-3.6621	-0.298754	USP40	ubiquitin specific peptidase 40
223289_s_at	0.332	0.00028937	4.55126	0.1068	0.9371	USP38	ubiquitin specific peptidase 38
221654_s_at	0.579	0.024963	2.46101	-3.2722	0.429183	USP3	ubiquitin specific peptidase 3
216957_at	0.614	0.0427948	-2.19122	-3.6807	-0.188418	USP22	ubiquitin specific peptidase 22
234735_s_at	0.507	0.00767208	-3.02658	-2.3676	-0.430393	USP21	ubiquitin specific peptidase 21
226357_at	0.599	0.035697	-2.28309	-3.5439	-0.159947	USP19	ubiquitin specific peptidase 19
225413_at	0.582	0.0289861	2.38717	-3.3859	0.168611	USMG5	up-regulated during skeletal muscle growth 5 homolog (mouse)
211184_s_at	0.5	0.00585105	-3.15354	-2.1595	-0.217432	USH1C	USH1 protein network component harmonin
227433_at	0.556	0.013087	-2.77373	-2.7779	-0.377847	USF3	upstream transcription factor family member 3
227424_x_at	0.582	0.0282435	-2.40004	-3.3662	-0.346311	URB1-AS1	URB1 antisense RNA 1 (head to head)
200883_at	0.621	0.0482003	2.13025	-3.77	0.339201	UQCRC2	ubiquinol-cytochrome c reductase core protein II
244293_at	0.579	0.0249821	2.46063	-3.2728	0.168736	UQCRB	ubiquinol-cytochrome c reductase binding protein
228142_at	0.519	0.00866334	2.96939	-2.461	0.227135	UQCR10	ubiquinol-cytochrome c reductase, complex III subunit X
217935_s_at	0.578	0.0228996	-2.50336	-3.2064	-0.194276	UQCC1	ubiquinol-cytochrome c reductase complex assembly factor 1
216586_at	0.622	0.0488586	-2.12325	-3.7801	-0.235397	UNGP2	uracil-DNA glycosylase pseudogene 2
214382_at	0.52	0.00906792	2.94786	-2.4961	1.1681	UNC93A	unc-93 homolog A (C. elegans)
206189_at	0.567	0.0201812	-2.56504	-3.1099	-0.183665	UNC5C	unc-5 netrin receptor C
239136_at	0.593	0.0344476	-2.301	-3.5169	-0.188043	UNC5B-AS1	UNC5B antisense RNA 1
236272_at	0.543	0.0114657	-2.83674	-2.6763	-0.240687	UNC119B	unc-119 lipid binding chaperone B
244168_s_at	0.588	0.0308088	-2.35684	-3.4323	-0.141167	ULK4	unc-51 like kinase 4
225610_at	0.614	0.0426674	-2.19274	-3.6784	-0.310588	UHRF2	ubiquitin like with PHD and ring finger domains 2
213120_at	0.558	0.0180241	-2.61988	-3.0234	-0.208217	UHRF1BP1L	UHRF1 binding protein 1 like
1568789_at	0.61	0.0401532	-2.22364	-3.6327	-0.142498	UHRF1BP1	UHRF1 binding protein 1
219948_x_at	0.389	0.00072381	4.1226	-0.5719	1.26469	UGT2A3	UDP glucuronosyltransferase family 2 member A3
207958_at	0.558	0.0171978	2.64257	-2.9874	0.561658	UGT2A2///UGT2A1	UDP glucuronosyltransferase family 2 member A2///UDP glucuronosyltransferase family 2 member A1 complex locus
221305_s_at	0.558	0.017945	2.62201	-3.02	1.22262	UGT1A3///UGT1A1///UGT1A9///UGT1A5///UGT1A8	UDP glucuronosyltransferase family 1 member A3///UDP glucuronosyltransferase family 1 member A1///UDP glucuronosyltransferase family 1 member A9///UDP glucuronosyltransferase family 1 member A5///UDP glucuronosyltransferase family 1 member A8
218257_s_at	0.556	0.0136133	-2.75488	-2.8082	-0.278306	UGGT1	UDP-glucose glycoprotein glucosyltransferase 1
1562741_at	0.591	0.0329047	-2.32397	-3.4822	-0.181268	UBXN4	UBX domain protein 4
208883_at	0.556	0.0135544	2.75695	-2.8048	0.380933	UBR5	ubiquitin protein ligase E3 component n-recognin 5
234982_at	0.588	0.0309276	2.35492	-3.4352	0.316119	UBR3	ubiquitin protein ligase E3 component n-recognin 3 (putative)
201535_at	0.582	0.027772	2.40838	-3.3534	0.293936	UBL3	ubiquitin like 3
205687_at	0.623	0.0495826	-2.11566	-3.7912	-0.318323	UBFD1	ubiquitin family domain containing 1
202317_s_at	0.519	0.00886571	-2.9585	-2.4787	-0.357254	UBE4B	ubiquitination factor E4B
228860_at	0.557	0.0156241	-2.68881	-2.9139	-0.264464	UBE3B	ubiquitin protein ligase E3B
222395_s_at	0.576	0.0223296	2.51569	-3.1872	0.258836	UBE2Z	ubiquitin conjugating enzyme E2 Z
230411_at	0.577	0.0226629	2.50844	-3.1985	0.242901	UBE2V2	ubiquitin conjugating enzyme E2 V2
226612_at	0.573	0.0216286	2.53128	-3.1628	0.993924	UBE2QL1	ubiquitin conjugating enzyme E2 Q family like 1
201523_x_at	0.592	0.0340504	2.30682	-3.5081	0.448871	UBE2N	ubiquitin conjugating enzyme E2 N
200682_s_at	0.619	0.0472893	2.14007	-3.7557	0.211464	UBE2L3	ubiquitin conjugating enzyme E2 L3
217824_at	0.582	0.0289089	2.38849	-3.3839	0.337393	UBE2J1	ubiquitin conjugating enzyme E2 J1
211008_s_at	0.614	0.0428549	-2.1905	-3.6817	-0.188768	UBE2I	ubiquitin conjugating enzyme E2 I
227950_at	0.5	0.00505994	-3.22133	-2.0479	-0.288772	UBE2H	ubiquitin conjugating enzyme E2 H
226005_at	0.614	0.0415278	2.20653	-3.658	0.322433	UBE2G1	ubiquitin conjugating enzyme E2 G1
200667_at	0.416	0.00110338	3.92701	-0.8883	0.36742	UBE2D3	ubiquitin conjugating enzyme E2 D3
201343_at	0.552	0.0126018	2.79176	-2.7489	0.305245	UBE2D2	ubiquitin conjugating enzyme E2 D2
214590_s_at	0.551	0.0123921	2.79976	-2.736	0.528252	UBE2D1	ubiquitin conjugating enzyme E2 D1
211763_s_at	0.489	0.003371	3.41011	-1.7368	0.593975	UBE2B	ubiquitin conjugating enzyme E2 B
238587_at	0.5	0.00580402	3.15731	-2.1533	0.320964	UBASH3B	ubiquitin associated and SH3 domain containing B
46270_at	0.623	0.0493782	2.1178	-3.7881	0.301943	UBAP1	ubiquitin associated protein 1
224298_s_at	0.58	0.0259767	-2.4414	-3.3025	-0.294189	UBAC2	UBA domain containing 2
218340_s_at	0.609	0.0395538	2.23127	-3.6213	0.711564	UBA6	ubiquitin like modifier activating enzyme 6
209115_at	0.582	0.0275043	2.41318	-3.346	0.238887	UBA3	ubiquitin like modifier activating enzyme 3
201177_s_at	0.578	0.022827	2.50491	-3.204	0.453258	UBA2	ubiquitin like modifier activating enzyme 2
209340_at	0.389	0.00058928	4.21827	-0.4185	0.781544	UAP1	UDP-N-acetylglucosamine pyrophosphorylase 1
238802_at	0.582	0.0270957	-2.42058	-3.3346	-0.201193	TYSND1	trypsin domain containing 1
211432_s_at	0.591	0.0335572	-2.31414	-3.4971	-0.216579	TYRO3	TYRO3 protein tyrosine kinase
218794_s_at	0.562	0.018813	2.59913	-3.0561	0.413284	TXNL4B	thioredoxin like 4B
227873_at	0.606	0.0376326	-2.25647	-3.5838	-0.352867	TXNDC15	thioredoxin domain containing 15
223017_at	0.614	0.0437423	-2.18003	-3.6971	-0.165513	TXNDC12	thioredoxin domain containing 12
232618_at	0.59	0.032149	-2.33559	-3.4646	-0.466384	TXLNGY	taxilin gamma pseudogene, Y-linked
213943_at	0.614	0.0428315	-2.19078	-3.6813	-0.146255	TWIST1	twist family bHLH transcription factor 1
224170_s_at	0.614	0.0418104	-2.20308	-3.6631	-0.162373	TULP4	tubby like protein 4
205807_s_at	0.563	0.0190327	-2.5935	-3.065	-0.275247	TUFT1	tuftelin 1
212242_at	0.562	0.0188115	-2.59917	-3.0561	-0.587579	TUBA4A	tubulin alpha 4a
1556043_a_at	0.571	0.0207622	-2.55122	-3.1315	-0.230228	TTN-AS1	TTN antisense RNA 1
1566102_at	0.613	0.0407999	2.21552	-3.6447	0.215798	TTLL5	tubulin tyrosine ligase like 5
1552257_a_at	0.558	0.0176154	-2.63098	-3.0058	-0.381124	TTLL12	tubulin tyrosine ligase like 12
231157_at	0.5	0.00540535	3.19054	-2.0986	0.430182	TTLL11	tubulin tyrosine ligase like 11
204407_at	0.601	0.0366737	-2.2695	-3.5643	-0.18026	TTF2	transcription termination factor 2
226557_at	0.591	0.0330297	-2.32207	-3.4851	-0.25586	TTC5	tetratricopeptide repeat domain 5
1552307_a_at	0.482	0.00321614	3.43192	-1.7008	0.668607	TTC39C	tetratricopeptide repeat domain 39C
236826_at	0.623	0.0496084	2.1154	-3.7915	0.217037	TTC39B	tetratricopeptide repeat domain 39B
218838_s_at	0.507	0.00732258	-3.04848	-2.3318	-0.538764	TTC31	tetratricopeptide repeat domain 31
213679_at	0.557	0.0155462	2.69122	-2.91	0.200738	TTC30A	tetratricopeptide repeat domain 30A
217964_at	0.557	0.0163835	2.66597	-2.9502	0.275354	TTC19	tetratricopeptide repeat domain 19
218972_at	0.591	0.0336845	-2.31224	-3.4999	-0.292882	TTC17	tetratricopeptide repeat domain 17
230191_at	0.416	0.00136098	-3.82988	-1.0467	-0.342458	TTBK1	tau tubulin kinase 1
213161_at	0.62	0.0477913	2.13463	-3.7636	0.269372	TSTD2///TMOD1	thiosulfate sulfurtransferase like domain containing 2///tropomodulin 1
213079_at	0.61	0.0400568	-2.22486	-3.6309	-0.200479	TSR2	TSR2, ribosome maturation factor
203824_at	0.497	0.00368313	-3.36903	-1.8045	-1.62682	TSPAN8	tetraspanin 8
209108_at	0.497	0.00372162	3.3642	-1.8125	0.411424	TSPAN6	tetraspanin 6
200972_at	0.507	0.00677557	3.0849	-2.2721	0.72003	TSPAN3	tetraspanin 3
217979_at	0.403	0.00096034	-3.99135	-0.7838	-1.24836	TSPAN13	tetraspanin 13
201504_s_at	0.514	0.00797742	3.00823	-2.3976	0.420811	TSN	translin
235737_at	0.522	0.00958804	2.92152	-2.5389	1.38004	TSLP	thymic stromal lymphopoietin
218245_at	0.591	0.0332366	-2.31895	-3.4898	-0.714424	TSKU	tsukushi, small leucine rich proteoglycan
238577_s_at	0.5	0.00505781	3.22153	-2.0476	0.650315	TSHZ2	teashirt zinc finger homeobox 2
201758_at	0.551	0.0121145	2.81055	-2.7186	0.184438	TSG101	tumor susceptibility 101
214331_at	0.6	0.0363225	2.27435	-3.557	0.259741	TSFM	Ts translation elongation factor, mitochondrial
204094_s_at	0.617	0.0454413	2.16053	-3.7258	0.826873	TSC22D2	TSC22 domain family member 2
237745_at	0.583	0.0292311	-2.38299	-3.3923	-0.14077	TSC22D1-AS1	TSC22D1 antisense RNA 1
215111_s_at	0.614	0.0415743	2.20596	-3.6589	0.744756	TSC22D1	TSC22 domain family member 1
215624_at	0.579	0.0243879	-2.47247	-3.2544	-0.253955	TSC2	tuberous sclerosis 2
222651_s_at	0.5	0.00553655	-3.17934	-2.117	-0.274359	TRPS1	transcriptional repressor GATA binding 1
243483_at	0.372	0.00040106	4.39798	-0.1332	1.32292	TRPM8	transient receptor potential cation channel subfamily M member 8
205238_at	0.617	0.0448071	-2.16773	-3.7152	-0.262013	TRMT2B	tRNA methyltransferase 2 homolog B
223404_s_at	0.588	0.0310052	-2.35367	-3.4371	-0.317196	TRMT1L	tRNA methyltransferase 1 like
218877_s_at	0.551	0.0122241	2.80626	-2.7255	0.71451	TRMT11	tRNA methyltransferase 11 homolog
222195_s_at	0.59	0.0320927	-2.33647	-3.4632	-0.262409	TRMO	tRNA methyltransferase O
225600_at	0.572	0.020949	-2.54685	-3.1384	-0.317321	TRIQK	triple QxxK/R motif containing
203732_at	0.5	0.00615026	3.13023	-2.1978	0.302059	TRIP4	thyroid hormone receptor interactor 4
204033_at	0.557	0.0162203	-2.67079	-2.9426	-0.246124	TRIP13	thyroid hormone receptor interactor 13
244659_at	0.578	0.0235026	2.49062	-3.2262	0.366819	TRIP12	thyroid hormone receptor interactor 12
236160_at	0.586	0.0301806	-2.3671	-3.4166	-0.370665	TRIP11	thyroid hormone receptor interactor 11
209013_x_at	0.609	0.0397317	2.22899	-3.6247	0.187997	TRIO	trio Rho guanine nucleotide exchange factor
1554182_at	0.57	0.0205905	-2.55526	-3.1252	-0.167546	TRIM74///TRIM73	tripartite motif containing 74///tripartite motif containing 73
233357_at	0.582	0.0283866	-2.39754	-3.3701	-0.198872	TRIM67	tripartite motif containing 67
1557507_at	0.622	0.0489446	2.12235	-3.7815	0.154003	TRIM52-AS1	TRIM52 antisense RNA 1 (head to head)
1556319_at	0.625	0.0498856	2.11252	-3.7957	0.177071	TRIM44	tripartite motif containing 44
1566851_at	0.558	0.0181005	2.61784	-3.0266	0.243511	TRIM42	tripartite motif containing 42
203610_s_at	0.609	0.0393293	2.23415	-3.617	0.5072	TRIM38	tripartite motif containing 38
202702_at	0.548	0.0118445	-2.82128	-2.7013	-0.499277	TRIM26	tripartite motif containing 26
213301_x_at	0.519	0.0086043	-2.97261	-2.4557	-0.546152	TRIM24	tripartite motif containing 24
1559682_at	0.581	0.0262296	-2.43662	-3.3099	-0.236194	TRIM16L	tripartite motif containing 16-like
36742_at	0.591	0.0330521	2.32173	-3.4856	0.918875	TRIM15	tripartite motif containing 15
229943_at	0.612	0.0406059	-2.21794	-3.6411	-0.422152	TRIM13	tripartite motif containing 13
219937_at	0.507	0.00716885	3.05844	-2.3155	0.452204	TRHDE	thyrotropin releasing hormone degrading enzyme
219434_at	0.581	0.026599	2.42972	-3.3206	1.06471	TREM1	triggering receptor expressed on myeloid cells 1
1562349_at	0.5	0.00462229	-3.26346	-1.9786	-0.168304	TRAPPC2	trafficking protein particle complex 2
236526_x_at	0.556	0.0140074	2.74123	-2.8301	0.249336	TRAPPC13	trafficking protein particle complex 13
202125_s_at	0.558	0.017334	-2.63876	-2.9935	-0.252104	TRAK2	trafficking kinesin protein 2
202079_s_at	0.485	0.00324386	3.42794	-1.7074	0.434591	TRAK1	trafficking kinesin protein 1
223031_s_at	0.579	0.0249102	-2.46205	-3.2706	-0.247382	TRAF7	TNF receptor associated factor 7
205558_at	0.577	0.0227052	2.50753	-3.1999	0.259427	TRAF6	TNF receptor associated factor 6
235688_s_at	0.53	0.010098	2.897	-2.5788	0.412107	TRAF4	TNF receptor associated factor 4
205804_s_at	0.582	0.027496	2.41333	-3.3458	0.255215	TRAF3IP3	TRAF3 interacting protein 3
200892_s_at	0.556	0.0130532	2.77496	-2.7759	0.463609	TRA2B	transformer 2 beta homolog (Drosophila)
216474_x_at	0.579	0.0247122	2.46598	-3.2645	0.437127	TPSB2///TPSAB1	tryptase beta 2 (gene/pseudogene)///tryptase alpha/beta 1
218855_at	0.558	0.0168292	-2.65303	-2.9708	-0.326518	TPRA1	transmembrane protein adipocyte associated 1
230104_s_at	0.617	0.0451716	2.16358	-3.7213	0.538387	TPPP	tubulin polymerization promoting protein
210342_s_at	0.559	0.0182447	-2.61399	-3.0327	-0.276379	TPO	thyroid peroxidase
203671_at	0.556	0.0137904	2.7487	-2.8181	0.199853	TPMT	thiopurine S-methyltransferase
209344_at	0.576	0.0225362	2.51119	-3.1942	0.348635	TPM4	tropomyosin 4
238079_at	0.614	0.0422131	-2.19819	-3.6704	-0.144498	TPM3	tropomyosin 3
204083_s_at	0.469	0.00257685	-3.53457	-1.5316	-0.647751	TPM2	tropomyosin 2 (beta)
210986_s_at	0.617	0.0453553	-2.1615	-3.7243	-0.603095	TPM1	tropomyosin 1 (alpha)
210050_at	0.599	0.0354894	-2.28603	-3.5394	-0.139037	TPI1	triosephosphate isomerase 1
235194_at	0.59	0.0321082	-2.33622	-3.4636	-0.155653	TPCN2	two pore segment channel 2
217914_at	0.588	0.0309381	-2.35475	-3.4354	-0.278356	TPCN1	two pore segment channel 1
203476_at	0.576	0.0221035	-2.52067	-3.1794	-0.320042	TPBG	trophoblast glycoprotein
224836_at	0.621	0.048401	2.1281	-3.7731	0.443765	TP53INP2	tumor protein p53 inducible nuclear protein 2
201685_s_at	0.469	0.00232966	3.58124	-1.4547	0.275256	TOX4	TOX high mobility group box family member 4
228737_at	0.564	0.0192044	2.58914	-3.0719	0.332148	TOX2	TOX high mobility group box family member 2
235453_at	0.579	0.0247447	2.46533	-3.2655	0.128839	TOR1AIP2	torsin 1A interacting protein 2
221979_at	0.617	0.0453367	2.16171	-3.724	0.243576	TOPORS-AS1	TOPORS antisense RNA 1
201519_at	0.591	0.0328542	2.32474	-3.481	0.175394	TOMM70	translocase of outer mitochondrial membrane 70
234720_s_at	0.582	0.0277722	-2.40838	-3.3534	-0.14587	TOB2	transducer of ERBB2, 2
206093_x_at	0.543	0.0114555	-2.83717	-2.6757	-0.251593	TNXB///TNXA	tenascin XB///tenascin XA (pseudogene)
239062_at	0.558	0.0175555	-2.63262	-3.0032	-0.226301	TNRC6C-AS1	TNRC6C antisense RNA 1
222562_s_at	0.557	0.0166602	2.65789	-2.9631	0.723432	TNKS2	tankyrase 2
217149_x_at	0.552	0.0125342	-2.79432	-2.7448	-0.215662	TNK1	tyrosine kinase non receptor 1
207196_s_at	0.618	0.0463632	2.15023	-3.7408	0.260205	TNIP1	TNFAIP3 interacting protein 1
223502_s_at	0.551	0.0122264	2.80617	-2.7257	0.673017	TNFSF13B	tumor necrosis factor superfamily member 13b
216042_at	0.557	0.0161685	-2.67233	-2.9401	-0.208249	TNFRSF25	TNF receptor superfamily member 25
218856_at	0.557	0.0151332	2.70416	-2.8894	0.522594	TNFRSF21	TNF receptor superfamily member 21
211163_s_at	0.599	0.0354086	2.28717	-3.5377	0.450357	TNFRSF10C	TNF receptor superfamily member 10c
210405_x_at	0.535	0.010615	2.87334	-2.6171	0.551764	TNFRSF10B	TNF receptor superfamily member 10b
210260_s_at	0.519	0.00882061	2.96091	-2.4748	0.934852	TNFAIP8	TNF alpha induced protein 8
208862_s_at	0.621	0.0487086	-2.12484	-3.7778	-0.267376	TMX2-CTNND1///CTNND1	TMX2-CTNND1 readthrough (NMD candidate)///catenin delta 1
216438_s_at	0.578	0.023191	2.49716	-3.216	0.212886	TMSB4X	thymosin beta 4, X-linked
211689_s_at	0.36	0.0003624	4.44549	-0.0585	1.41437	TMPRSS2	transmembrane protease, serine 2
217269_s_at	0.578	0.0237316	-2.48586	-3.2336	-0.20936	TMPRSS15	transmembrane protease, serine 15
203662_s_at	0.531	0.0101473	2.8947	-2.5825	0.742269	TMOD1	tropomodulin 1
226565_at	0.5	0.00391054	-3.34121	-1.8504	-0.46301	TMEM99	transmembrane protein 99
214283_at	0.395	0.00079937	-4.07647	-0.6462	-0.423983	TMEM97	transmembrane protein 97
222718_at	0.609	0.039538	-2.23147	-3.621	-0.186565	TMEM8A	transmembrane protein 8A
65630_at	0.535	0.010613	-2.87343	-2.617	-0.284226	TMEM80	transmembrane protein 80
219449_s_at	0.591	0.0331297	2.32056	-3.4873	0.51276	TMEM70	transmembrane protein 70
1552765_x_at	0.58	0.0255661	-2.44926	-3.2904	-0.11707	TMEM67	transmembrane protein 67
241018_at	0.579	0.0248192	2.46385	-3.2678	0.145528	TMEM59	transmembrane protein 59
230467_at	0.496	0.00352759	3.38905	-1.7715	0.374653	TMEM52	transmembrane protein 52
228001_at	0.565	0.0197294	-2.57605	-3.0925	-0.372897	TMEM50B	transmembrane protein 50B
217766_s_at	0.507	0.00718888	3.05713	-2.3176	0.427743	TMEM50A	transmembrane protein 50A
230323_s_at	0.591	0.0324584	2.3308	-3.4718	1.2973	TMEM45B	transmembrane protein 45B
223784_at	0.576	0.022383	2.51452	-3.189	0.559053	TMEM27	transmembrane protein 27
224759_s_at	0.556	0.0130422	2.77536	-2.7753	0.418327	TMEM263	transmembrane protein 263
1553956_at	0.558	0.0174577	-2.63532	-2.9989	-0.217837	TMEM237	transmembrane protein 237
223656_s_at	0.609	0.039626	-2.23034	-3.6227	-0.165737	TMEM234	transmembrane protein 234
227544_at	0.463	0.00214052	-3.62041	-1.3902	-0.2439	TMEM229B	transmembrane protein 229B
226073_at	0.621	0.0480443	-2.13192	-3.7675	-0.260152	TMEM218	transmembrane protein 218
217899_at	0.58	0.0258958	-2.44294	-3.3002	-0.380313	TMEM214	transmembrane protein 214
226589_at	0.515	0.00835385	-2.98653	-2.433	-0.328117	TMEM192	transmembrane protein 192
226860_at	0.558	0.0167157	2.65629	-2.9656	0.497038	TMEM19	transmembrane protein 19
204340_at	0.614	0.0423116	-2.197	-3.6721	-0.415051	TMEM187	transmembrane protein 187
1553301_a_at	0.56	0.0184736	2.60796	-3.0422	0.18987	TMEM182	transmembrane protein 182
225487_at	0.579	0.0245764	-2.46868	-3.2603	-0.20497	TMEM18	transmembrane protein 18
235798_at	0.614	0.0414732	2.2072	-3.6571	0.412402	TMEM170B	transmembrane protein 170B
222495_at	0.5	0.00614633	3.13053	-2.1973	0.375767	TMEM167B	transmembrane protein 167B
218095_s_at	0.587	0.0305253	2.36144	-3.4252	0.305446	TMEM165	transmembrane protein 165
227861_at	0.618	0.0462526	2.15146	-3.739	0.188559	TMEM161B	transmembrane protein 161B
43977_at	0.6	0.0362963	-2.27471	-3.5564	-0.209391	TMEM161A	transmembrane protein 161A
213338_at	0.586	0.0300202	2.36975	-3.4126	0.278	TMEM158	transmembrane protein 158 (gene/pseudogene)
238063_at	0.332	9.726e-05	5.07061	0.8942	1.32547	TMEM154	transmembrane protein 154
226239_at	0.558	0.0177494	-2.62731	-3.0116	-0.291677	TMEM150A	transmembrane protein 150A
222905_s_at	0.557	0.016235	-2.67035	-2.9433	-0.35608	TMEM143	transmembrane protein 143
208810_at	0.557	0.014605	2.7212	-2.8621	0.537797	TMEM135///DNAJB6	transmembrane protein 135///DnaJ heat shock protein family (Hsp40) member B6
222209_s_at	0.215	2.298e-05	5.78093	1.8974	0.48875	TMEM135	transmembrane protein 135
223595_at	0.614	0.0412592	2.20983	-3.6532	0.363083	TMEM133	transmembrane protein 133
212507_at	0.618	0.0456911	2.15772	-3.7299	0.286385	TMEM131	transmembrane protein 131
225588_s_at	0.591	0.0337915	-2.31065	-3.5023	-0.236868	TMEM129	transmembrane protein 129
221622_s_at	0.617	0.0455414	2.1594	-3.7274	0.263792	TMEM126B	transmembrane protein 126B
227300_at	0.578	0.0235074	-2.49052	-3.2264	-0.178943	TMEM119	transmembrane protein 119
223594_at	0.619	0.0470073	-2.14314	-3.7512	-0.368563	TMEM117	transmembrane protein 117
226856_at	0.591	0.0328427	-2.32492	-3.4808	-0.329772	TMEM110-MUSTN1///MUSTN1///TMEM110	TMEM110-MUSTN1 readthrough///musculoskeletal, embryonic nuclear protein 1///transmembrane protein 110
227078_at	0.581	0.0266381	-2.42899	-3.3217	-0.271361	TMEM110	transmembrane protein 110
234818_at	0.515	0.00827597	-2.99094	-2.4258	-0.246764	TMEM108	transmembrane protein 108
225004_at	0.618	0.0463264	-2.15064	-3.7402	-0.300105	TMEM101	transmembrane protein 101
221096_s_at	0.5	0.00594924	-3.14576	-2.1722	-0.41451	TMCO6	transmembrane and coiled-coil domains 6
227007_at	0.519	0.00889785	-2.9568	-2.4815	-0.280585	TMCO4	transmembrane and coiled-coil domains 4
226489_at	0.61	0.0398138	2.22794	-3.6263	0.495106	TMCC3	transmembrane and coiled-coil domain family 3
220021_at	0.389	0.00073525	-4.11531	-0.5836	-0.212814	TMC7	transmembrane channel like 7
1563222_at	0.625	0.0499146	-2.11222	-3.7961	-0.176747	TMBIM4	transmembrane BAX inhibitor motif containing 4
224755_at	0.514	0.0078743	3.01435	-2.3876	0.418633	TM9SF3	transmembrane 9 superfamily member 3
209387_s_at	0.586	0.0297445	2.37434	-3.4056	1.82568	TM4SF1	transmembrane 4 L six family member 1
224341_x_at	0.523	0.00971449	2.91532	-2.549	0.805032	TLR4	toll like receptor 4
204924_at	0.582	0.0270841	2.42079	-3.3343	0.667538	TLR2	toll like receptor 2
212770_at	0.5	0.00403267	3.32692	-1.874	0.930088	TLE3	transducin like enhancer of split 3
232017_at	0.507	0.00766846	3.0268	-2.3672	1.23047	TJP2	tight junction protein 2
212665_at	0.514	0.00806089	3.00334	-2.4056	1.08468	TIPARP	TCDD inducible poly(ADP-ribose) polymerase
217612_at	0.557	0.0156017	-2.6895	-2.9128	-0.249824	TIMM50	translocase of inner mitochondrial membrane 50
203092_at	0.591	0.0331713	-2.31993	-3.4883	-0.185947	TIMM44	translocase of inner mitochondrial membrane 44
229428_at	0.575	0.0219261	2.52461	-3.1732	0.540485	TIMM23B	translocase of inner mitochondrial membrane 23 homolog B
222481_at	0.558	0.0174731	2.6349	-2.9996	0.240106	TIMM10B	translocase of inner mitochondrial membrane 10 homolog B (yeast)
203046_s_at	0.571	0.0206867	-2.55299	-3.1288	-0.420123	TIMELESS	timeless circadian clock
229983_at	0.537	0.0108578	-2.86262	-2.6345	-0.912143	TIGD2	tigger transposable element derived 2
219099_at	0.604	0.0373041	2.2609	-3.5771	0.593657	TIGAR	TP53 induced glycolysis regulatory phosphatase
226117_at	0.582	0.0270878	2.42072	-3.3344	1.02094	TIFA	TRAF interacting protein with forkhead associated domain
202405_at	0.58	0.0260453	2.4401	-3.3045	0.222018	TIAL1	TIA1 cytotoxic granule-associated RNA binding protein-like 1
218491_s_at	0.563	0.0191267	-2.59111	-3.0688	-0.401246	THYN1	thymocyte nuclear protein 1
208851_s_at	0.618	0.0464874	-2.14886	-3.7428	-0.229184	THY1	Thy-1 cell surface antigen
222835_at	0.62	0.047691	2.13571	-3.762	0.417053	THSD4	thrombospondin type 1 domain containing 4
228716_at	0.581	0.026586	2.42996	-3.3202	0.377972	THRB	thyroid hormone receptor beta
204100_at	0.591	0.0331984	-2.31952	-3.4889	-0.172439	THRA	thyroid hormone receptor, alpha
207571_x_at	0.588	0.0312484	2.34978	-3.443	0.534266	THEMIS2	thymocyte selection associated family member 2
215775_at	0.621	0.0478816	-2.13366	-3.765	-0.137025	THBS1	thrombospondin 1
203887_s_at	0.617	0.0446551	2.16947	-3.7127	0.741096	THBD	thrombomodulin
215009_s_at	0.514	0.00801697	3.00591	-2.4014	0.394395	THAP9-AS1	THAP9 antisense RNA 1
227813_at	0.585	0.0294244	-2.37972	-3.3973	-0.244747	THAP6	THAP domain containing 6
219596_at	0.286	5.169e-05	-5.3782	1.3396	-0.541725	THAP10	THAP domain containing 10
212040_at	0.581	0.0263723	-2.43395	-3.314	-0.306977	TGOLN2	trans-golgi network protein 2
237288_at	0.623	0.0494591	-2.11695	-3.7893	-0.156724	TGM7	transglutaminase 7
205210_at	0.556	0.0141167	2.7375	-2.836	0.209065	TGFBRAP1	transforming growth factor beta receptor associated protein 1
209651_at	0.5	0.00613567	-3.13134	-2.1959	-0.512911	TGFB1I1	transforming growth factor beta 1 induced transcript 1
214476_at	0.584	0.0292739	-2.38226	-3.3934	-0.696568	TFF2	trefoil factor 2
205009_at	0.582	0.0272419	-2.41792	-3.3387	-0.437182	TFF1	trefoil factor 1
206715_at	0.588	0.0310982	2.35218	-3.4394	0.419408	TFEC	transcription factor EC
50221_at	0.556	0.0144347	2.72683	-2.8531	0.238278	TFEB	transcription factor EB
205688_at	0.614	0.0425706	-2.19389	-3.6767	-0.153308	TFAP4	transcription factor AP-4
237428_at	0.617	0.0449674	-2.1659	-3.7179	-0.111039	TEX43	testis expressed 43
219786_at	0.579	0.0245933	-2.46835	-3.2608	-0.14494	TESMIN	testis expressed metallothionein like protein
34260_at	0.624	0.0498182	-2.11322	-3.7947	-0.182183	TELO2	telomere maintenance 2
217711_at	0.621	0.0480671	-2.13167	-3.7679	-0.20433	TEK	TEK receptor tyrosine kinase
224955_at	0.469	0.00270819	3.51155	-1.5695	0.522725	TEAD1	TEA domain transcription factor 1
223530_at	0.617	0.0451815	-2.16347	-3.7215	-0.215146	TDRKH	tudor and KH domain containing
228285_at	0.609	0.0388104	-2.24088	-3.607	-0.179115	TDRD9	tudor domain containing 9
221018_s_at	0.614	0.0412665	-2.20974	-3.6533	-0.129269	TDRD1	tudor domain containing 1
231702_at	0.427	0.00162482	3.74791	-1.1808	1.17465	TDO2	tryptophan 2,3-dioxygenase
203054_s_at	0.575	0.0219391	-2.52432	-3.1737	-0.232515	TCTA	T-cell leukemia translocation altered
220826_at	0.582	0.0282593	-2.39976	-3.3666	-0.17353	TCP10L	t-complex 10-like
202384_s_at	0.614	0.0430721	-2.18792	-3.6855	-0.21697	TCOF1	treacle ribosome biogenesis factor 1
207894_s_at	0.615	0.0438868	-2.17835	-3.6996	-0.180677	TCL6	T-cell leukemia/lymphoma 6 (non-protein coding)
223455_at	0.591	0.0330419	-2.32189	-3.4853	-0.230268	TCHP	trichoplein keratin filament binding
216511_s_at	0.588	0.0314442	2.34666	-3.4478	0.519653	TCF7L2	transcription factor 7 like 2
221016_s_at	0.427	0.00151483	-3.78033	-1.1277	-0.431303	TCF7L1	transcription factor 7 like 1
215260_s_at	0.563	0.0189834	-2.59476	-3.063	-0.195874	TCF3	transcription factor 3
223274_at	0.614	0.0424917	-2.19484	-3.6753	-0.275101	TCF19	transcription factor 19
213685_at	0.497	0.00376201	-3.35919	-1.8208	-0.784294	TCEB3-AS1	TCEB3 antisense RNA 1
1570625_at	0.621	0.0485203	-2.12684	-3.7749	-0.134444	TCEB3	transcription elongation factor B subunit 3
202823_at	0.557	0.0161564	2.67269	-2.9395	0.554968	TCEB1	transcription elongation factor B subunit 1
1563863_x_at	0.604	0.0374004	-2.25959	-3.5791	-0.166351	TCEANC	transcription elongation factor A N-terminal and central domain containing
226688_at	0.623	0.0492003	-2.11966	-3.7854	-0.271848	TCAIM	T-cell activation inhibitor, mitochondrial
233947_s_at	0.582	0.0270573	-2.42128	-3.3336	-0.150498	TBX5-AS1	TBX5 antisense RNA 1
219682_s_at	0.332	0.00020802	-4.7072	0.3476	-1.10695	TBX3	T-box 3
236926_at	0.5	0.00418722	-3.30944	-1.9028	-0.309912	TBX1	T-box 1
235890_at	0.572	0.0213362	2.53792	-3.1524	0.306338	TBL1XR1	transducin (beta)-like 1 X-linked receptor 1
218520_at	0.606	0.0379113	2.25274	-3.5893	0.289627	TBK1	TANK binding kinase 1
227395_at	0.557	0.0146008	-2.72134	-2.8619	-0.361548	TBCEL	tubulin folding cofactor E like
203715_at	0.578	0.0234081	2.4926	-3.2232	0.257521	TBCE	tubulin folding cofactor E
204526_s_at	0.372	0.00039104	4.40984	-0.1145	0.754678	TBC1D8	TBC1 domain family member 8
212796_s_at	0.558	0.0179287	2.62245	-3.0193	0.429173	TBC1D2B	TBC1 domain family member 2B
222173_s_at	0.586	0.0299048	-2.37167	-3.4096	-0.321398	TBC1D2	TBC1 domain family member 2
222116_s_at	0.579	0.0245095	-2.47003	-3.2582	-0.412443	TBC1D16	TBC1 domain family member 16
218268_at	0.565	0.0197596	2.5753	-3.0937	0.480753	TBC1D15	TBC1 domain family member 15
44696_at	0.587	0.0304888	-2.36204	-3.4243	-0.328369	TBC1D13	TBC1 domain family member 13
1553145_at	0.606	0.0382096	-2.24878	-3.5952	-0.24109	TAPT1-AS1	TAPT1 antisense RNA 1 (head to head)
202307_s_at	0.565	0.0198567	2.57292	-3.0975	0.506516	TAP1	transporter 1, ATP binding cassette subfamily B member
210458_s_at	0.614	0.0427601	2.19163	-3.6801	0.600547	TANK	TRAF family member associated NFKB activator
226467_at	0.623	0.0495894	-2.11559	-3.7913	-0.27235	TANGO6	transport and golgi organization 6 homolog
210978_s_at	0.5	0.00543593	3.1879	-2.103	0.502986	TAGLN2	transgelin 2
228483_s_at	0.536	0.0107869	2.86572	-2.6295	0.595269	TAF9B	TATA-box binding protein associated factor 9b
235119_at	0.533	0.0104041	-2.88286	-2.6017	-0.253014	TAF3	TATA-box binding protein associated factor 3
206613_s_at	0.579	0.0249737	-2.4608	-3.2725	-0.201781	TAF1A	TATA-box binding protein associated factor, RNA polymerase I subunit A
234168_at	0.578	0.0230828	2.49945	-3.2125	0.192597	TAF15	TATA-box binding protein associated factor 15
227278_at	0.522	0.00964409	2.91876	-2.5434	0.535114	TAF13	TATA-box binding protein associated factor 13
227128_s_at	0.588	0.0308298	-2.3565	-3.4328	-0.166301	TACSTD2	tumor-associated calcium signal transducer 2
200911_s_at	0.617	0.0447924	2.1679	-3.715	0.26941	TACC1	transforming acidic coiled-coil containing protein 1
227357_at	0.416	0.0013714	3.82635	-1.0524	0.371148	TAB3	TGF-beta activated kinase 1/MAP3K7 binding protein 3
238423_at	0.535	0.0106915	2.86994	-2.6226	0.284826	SYTL3	synaptotagmin like 3
223529_at	0.469	0.00236447	-3.57438	-1.466	-0.199586	SYT4	synaptotagmin 4
229053_at	0.538	0.010997	-2.85657	-2.6443	-0.705559	SYT17	synaptotagmin 17
228072_at	0.557	0.0164601	2.66372	-2.9538	0.651875	SYT12	synaptotagmin 12
230611_at	0.556	0.0132969	2.76612	-2.7901	0.329953	SYPL2	synaptophysin like 2
213200_at	0.482	0.00320959	-3.43286	-1.6992	-0.302985	SYP	synaptophysin
219804_at	0.581	0.0267379	-2.42715	-3.3245	-0.128997	SYNPO2L	synaptopodin 2 like
227662_at	0.617	0.0449939	-2.1656	-3.7183	-0.435809	SYNPO2	synaptopodin 2
230297_x_at	0.578	0.0239946	-2.48046	-3.242	-0.251379	SYNGAP1	synaptic Ras GTPase activating protein 1
219563_at	0.619	0.0472747	-2.14022	-3.7554	-0.487348	SYNE3///LINC00341	spectrin repeat containing nuclear envelope family member 3///long intergenic non-protein coding RNA 341
1555427_s_at	0.591	0.0327593	2.32619	-3.4788	0.446187	SYNCRIP	synaptotagmin binding cytoplasmic RNA interacting protein
226068_at	0.614	0.0431991	2.18642	-3.6877	0.315457	SYK	spleen associated tyrosine kinase
227352_at	0.557	0.0151654	-2.70313	-2.891	-0.235307	SWSAP1	SWIM-type zinc finger 7 associated protein 1
226027_at	0.519	0.00860555	-2.97255	-2.4558	-0.467231	SWI5	SWI5 homologous recombination repair protein
230285_at	0.581	0.0264719	2.43208	-3.3169	0.306814	SVIP	small VCP interacting protein
213247_at	0.5	0.00575679	-3.16113	-2.147	-0.373172	SVEP1	sushi, von Willebrand factor type A, EGF and pentraxin domain containing 1
219389_at	0.6	0.0363485	-2.27398	-3.5575	-0.459822	SUSD4	sushi domain containing 4
227480_at	0.582	0.0275022	-2.41321	-3.346	-0.140589	SUSD2	sushi domain containing 2
204067_at	0.585	0.0294851	-2.37869	-3.3989	-0.485467	SUOX	sulfite oxidase
231618_s_at	0.618	0.0463186	2.15072	-3.7401	0.119561	SUN3	Sad1 and UNC84 domain containing 3
206292_s_at	0.6	0.036198	-2.27608	-3.5544	-0.49674	SULT2A1	sulfotransferase family 2A member 1
203615_x_at	0.58	0.0260288	-2.44041	-3.3041	-0.626973	SULT1A1	sulfotransferase family 1A member 1
230560_at	0.5	0.00608047	-3.13556	-2.189	-0.285831	STXBP6	syntaxin binding protein 6
209238_at	0.614	0.0424419	2.19544	-3.6744	0.654361	STX3	syntaxin 3
207346_at	0.615	0.0440121	-2.17689	-3.7018	-0.200021	STX2	syntaxin 2
212112_s_at	0.58	0.0261872	2.43742	-3.3087	0.377084	STX12	syntaxin 12
202223_at	0.609	0.0394319	-2.23283	-3.619	-0.400988	STT3A	STT3A, catalytic subunit of the oligosaccharyltransferase complex
1569813_at	0.617	0.0450507	-2.16496	-3.7193	-0.172613	STRN	striatin
223245_at	0.557	0.0147298	-2.71712	-2.8687	-0.311057	STRBP	spermatid perinuclear RNA binding protein
234317_s_at	0.5	0.00540472	-3.19059	-2.0985	-0.28737	STOX2	storkhead box 2
205411_at	0.5	0.00602944	-3.1395	-2.1825	-0.207617	STK4	serine/threonine kinase 4
1553117_a_at	0.614	0.0412301	-2.21019	-3.6526	-0.295742	STK38	serine/threonine kinase 38
231806_s_at	0.584	0.029339	-2.38116	-3.3951	-0.284081	STK36	serine/threonine kinase 36
205214_at	0.582	0.0272731	2.41735	-3.3396	0.57122	STK17B	serine/threonine kinase 17b
202693_s_at	0.556	0.0133603	2.76385	-2.7938	1.06546	STK17A	serine/threonine kinase 17a
204292_x_at	0.582	0.0283251	-2.39861	-3.3684	-0.274927	STK11	serine/threonine kinase 11
228394_at	0.552	0.0126414	2.79026	-2.7513	0.271826	STK10	serine/threonine kinase 10
218424_s_at	0.591	0.0330039	-2.32246	-3.4845	-0.580033	STEAP3	STEAP3 metalloreductase
211505_s_at	0.615	0.0439754	2.17732	-3.7011	0.298232	STAU1	staufen double-stranded RNA binding protein 1
201331_s_at	0.609	0.0392652	-2.23498	-3.6158	-0.292529	STAT6	signal transducer and activator of transcription 6
206118_at	0.581	0.0266821	2.42818	-3.3229	0.728233	STAT4	signal transducer and activator of transcription 4
AFFX-HUMISGF3A/M97935_MB_at	0.578	0.0228883	2.5036	-3.206	0.668006	STAT1	signal transducer and activator of transcription 1
227108_at	0.579	0.0247275	-2.46567	-3.265	-0.154543	STARD9	StAR related lipid transfer domain containing 9
227606_s_at	0.6	0.0362327	-2.27559	-3.5551	-0.212592	STAMBPL1	STAM binding protein like 1
221191_at	0.5	0.00425542	-3.30193	-1.9152	-0.326712	STAG3L3	stromal antigen 3-like 3 (pseudogene)
236110_at	0.582	0.0272132	-2.41844	-3.3379	-0.163063	ST8SIA5	ST8 alpha-N-acetyl-neuraminide alpha-2,8-sialyltransferase 5
1555912_at	0.558	0.0178701	2.62404	-3.0168	0.16351	ST7-AS1	ST7 antisense RNA 1
230482_at	0.556	0.0141347	-2.73689	-2.837	-0.172894	ST6GALNAC5	ST6 N-acetylgalactosaminide alpha-2,6-sialyltransferase 5
235334_at	0.578	0.0240221	-2.47989	-3.2429	-0.281376	ST6GALNAC3	ST6 N-acetylgalactosaminide alpha-2,6-sialyltransferase 3
202440_s_at	0.576	0.0222481	-2.51748	-3.1844	-0.408913	ST5	suppression of tumorigenicity 5
213355_at	0.582	0.0278916	2.40625	-3.3567	0.379808	ST3GAL6	ST3 beta-galactoside alpha-2,3-sialyltransferase 6
215710_at	0.614	0.0419894	-2.2009	-3.6664	-0.155994	ST3GAL4	ST3 beta-galactoside alpha-2,3-sialyltransferase 4
217650_x_at	0.556	0.0133707	-2.76348	-2.7944	-0.221958	ST3GAL2	ST3 beta-galactoside alpha-2,3-sialyltransferase 2
1556588_at	0.601	0.0365634	2.27101	-3.562	0.397793	ST20-AS1	ST20 antisense RNA 1
208666_s_at	0.606	0.0376236	2.25659	-3.5836	0.460081	ST13	suppression of tumorigenicity 13 (colon carcinoma) (Hsp70 interacting protein)
211731_x_at	0.58	0.0252544	2.4553	-3.281	0.145302	SSX3	SSX family member 3
235591_at	0.606	0.0381029	2.25019	-3.5931	0.343429	SSTR1	somatostatin receptor 1
222411_s_at	0.619	0.0471205	-2.1419	-3.753	-0.371397	SSR3	signal sequence receptor subunit 3
51192_at	0.565	0.0197132	-2.57645	-3.0919	-0.158918	SSH3	slingshot protein phosphatase 3
229744_at	0.332	0.00012451	4.95182	0.7179	0.570851	SSFA2	sperm specific antigen 2
229269_x_at	0.551	0.0123735	-2.80047	-2.7349	-0.203804	SSBP4	single stranded DNA binding protein 4
202817_s_at	0.619	0.0469286	2.144	-3.7499	0.833249	SS18	SS18, nBAF chromatin remodeling complex subunit
200685_at	0.618	0.0458971	2.15541	-3.7333	0.414603	SRSF11	serine and arginine rich splicing factor 11
204955_at	0.588	0.0309963	-2.35381	-3.4369	-0.561068	SRPX	sushi repeat containing protein, X-linked
201858_s_at	0.565	0.0195771	2.57981	-3.0866	1.56358	SRGN	serglycin
209794_at	0.557	0.0158312	-2.68248	-2.924	-0.205367	SRGAP3	SLIT-ROBO Rho GTPase activating protein 3
206938_at	0.389	0.00073652	4.1145	-0.5849	1.093	SRD5A2	steroid 5 alpha-reductase 2
232547_at	0.604	0.0371988	-2.26232	-3.575	-0.141389	SRCIN1	SRC kinase signaling inhibitor 1
1565082_x_at	0.614	0.0426191	-2.19331	-3.6776	-0.121415	SRC	SRC proto-oncogene, non-receptor tyrosine kinase
217995_at	0.558	0.0169717	2.64896	-2.9773	0.480783	SQRDL	sulfide quinone reductase-like (yeast)
216202_s_at	0.556	0.0129491	2.77878	-2.7698	0.444228	SPTLC2	serine palmitoyltransferase long chain base subunit 2
224145_s_at	0.595	0.0348753	-2.2948	-3.5262	-0.199489	SPTBN4	spectrin beta, non-erythrocytic 4
215918_s_at	0.507	0.0068818	3.0776	-2.2841	0.582931	SPTBN1	spectrin beta, non-erythrocytic 1
226075_at	0.538	0.0111192	2.85132	-2.6528	1.21316	SPSB1	splA/ryanodine receptor domain and SOCS box containing 1
204011_at	0.618	0.0463967	2.14986	-3.7414	0.544027	SPRY2	sprouty RTK signaling antagonist 2
230212_at	0.579	0.0247331	-2.46556	-3.2652	-0.221956	SPRY1	sprouty RTK signaling antagonist 1
214478_at	0.624	0.0497551	2.11387	-3.7938	0.321103	SPP2	secreted phosphoprotein 2
218565_at	0.609	0.0388156	-2.24081	-3.6071	-0.470999	SPOUT1	SPOUT domain containing methyltransferase 1
208927_at	0.552	0.0126392	-2.79034	-2.7512	-0.400341	SPOP	speckle type BTB/POZ protein
209436_at	0.606	0.0381785	-2.24919	-3.5946	-0.534563	SPON1	spondin 1
228325_at	0.507	0.00732849	3.0481	-2.3324	1.09737	SPIDR	scaffolding protein involved in DNA repair
205312_at	0.456	0.00204903	3.64062	-1.357	0.261664	SPI1	Spi-1 proto-oncogene
40273_at	0.575	0.0219483	-2.52411	-3.174	-0.399324	SPHK2	sphingosine kinase 2
219257_s_at	0.601	0.0366211	2.27022	-3.5632	0.345307	SPHK1	sphingosine kinase 1
220218_at	0.623	0.0495065	-2.11646	-3.79	-0.210424	SPATA6L	spermatogenesis associated 6 like
220299_at	0.591	0.0328331	-2.32506	-3.4805	-0.25941	SPATA6	spermatogenesis associated 6
218933_at	0.557	0.0147405	2.71677	-2.8692	0.183098	SPATA5L1	spermatogenesis associated 5 like 1
229075_at	0.578	0.0235216	-2.49022	-3.2268	-0.152272	SPATA5	spermatogenesis associated 5
1570242_x_at	0.506	0.0066777	-3.09171	-2.261	-0.228375	SPATA21	spermatogenesis associated 21
1553582_a_at	0.602	0.0368935	-2.26648	-3.5688	-0.218127	SPAG11A///SPAG11B	sperm associated antigen 11A///sperm associated antigen 11B
220982_s_at	0.58	0.0257393	-2.44593	-3.2955	-0.150989	SPACA1	sperm acrosome associated 1
238035_at	0.563	0.0190193	2.59384	-3.0645	0.366552	SP3	Sp3 transcription factor
1565588_at	0.609	0.039403	-2.2332	-3.6185	-0.161982	SP140L	SP140 nuclear body protein like
209761_s_at	0.5	0.00434733	3.292	-1.9315	0.699851	SP110	SP110 nuclear body protein
1553685_s_at	0.614	0.0426713	2.19269	-3.6785	0.378533	SP1	Sp1 transcription factor
228358_at	0.582	0.0281215	-2.40219	-3.3629	-0.153338	SOX12	SRY-box 12
230982_at	0.572	0.0212247	-2.54048	-3.1484	-0.309229	SOX1	SRY-box 1
219496_at	0.556	0.01441	2.72765	-2.8518	0.939886	SOWAHC	sosondowah ankyrin repeat domain family member C
212870_at	0.563	0.0191245	2.59117	-3.0687	0.271919	SOS2	SOS Ras/Rho guanine nucleotide exchange factor 2
209253_at	0.5	0.00456751	-3.26901	-1.9694	-0.270034	SORBS3	sorbin and SH3 domain containing 3
205236_x_at	0.557	0.0165249	-2.66182	-2.9568	-0.219594	SOD3	superoxide dismutase 3, extracellular
206359_at	0.504	0.00646934	3.10656	-2.2366	0.813424	SOCS3	suppressor of cytokine signaling 3
210001_s_at	0.588	0.0309761	2.35414	-3.4364	0.580558	SOCS1	suppressor of cytokine signaling 1
228479_at	0.571	0.0206514	2.55382	-3.1275	0.575185	SOAT1	sterol O-acyltransferase 1
223028_s_at	0.556	0.0138257	2.74747	-2.8201	0.418283	SNX9	sorting nexin 9
214712_at	0.621	0.0485016	2.12703	-3.7746	0.310628	SNX29P2	sorting nexin 29 pseudogene 2
221006_s_at	0.609	0.0395692	-2.23107	-3.6216	-0.237583	SNX27	sorting nexin family member 27
202358_s_at	0.599	0.0356368	-2.28394	-3.5426	-0.280199	SNX19	sorting nexin 19
205482_x_at	0.389	0.00071063	-4.13114	-0.5581	-0.267519	SNX15	sorting nexin 15
213364_s_at	0.509	0.00775078	3.02179	-2.3755	0.385499	SNX1	sorting nexin 1
207438_s_at	0.476	0.00309728	-3.44937	-1.672	-0.278734	SNUPN	snurportin 1
226685_at	0.515	0.00842812	2.98236	-2.4398	0.403063	SNTB2	syntrophin beta 2
202690_s_at	0.578	0.0228417	2.5046	-3.2045	0.365366	SNRPD1	small nuclear ribonucleoprotein D1 polypeptide
201770_at	0.62	0.0477407	-2.13518	-3.7628	-0.332078	SNRPA	small nuclear ribonucleoprotein polypeptide A
212438_at	0.507	0.00767062	3.02667	-2.3675	0.363846	SNRNP27	small nuclear ribonucleoprotein U4/U6.U5 subunit 27
235536_at	0.448	0.00182614	3.69388	-1.2695	0.67452	SNORD89	small nucleolar RNA, C/D box 89
214744_s_at	0.578	0.0239938	2.48047	-3.242	0.345248	SNORA21///RPL23	small nucleolar RNA, H/ACA box 21///ribosomal protein L23
235837_at	0.557	0.0146782	2.71881	-2.866	0.425412	SNIP1	Smad nuclear interacting protein 1
1564906_at	0.616	0.0442935	-2.17363	-3.7065	-0.100957	SNHG4///MATR3	small nucleolar RNA host gene 4///matrin 3
1568249_at	0.469	0.00271159	-3.51097	-1.5705	-0.564929	SNHG17///SNORA71B	small nucleolar RNA host gene 17///small nucleolar RNA, H/ACA box 71B
225857_s_at	0.496	0.00348349	3.39489	-1.7619	0.773083	SNHG17	small nucleolar RNA host gene 17
218391_at	0.606	0.0377658	-2.25468	-3.5864	-0.324095	SNF8	SNF8, ESCRT-II complex subunit
1556154_a_at	0.565	0.0192423	-2.58819	-3.0734	-0.210619	SNAI3-AS1	SNAI3 antisense RNA 1
205596_s_at	0.582	0.0288497	2.38951	-3.3824	0.658135	SMURF2	SMAD specific E3 ubiquitin protein ligase 2
1556030_at	0.579	0.0251287	-2.45775	-3.2772	-0.186238	SMTN	smoothelin
200071_at	0.614	0.0416403	2.20515	-3.6601	0.411802	SMNDC1	survival motor neuron domain containing 1
230716_at	0.5	0.00512508	-3.21537	-2.0578	-0.634439	SMLR1	small leucine rich protein 1
213312_at	0.606	0.0376567	-2.25614	-3.5842	-0.26367	SMIM8	small integral membrane protein 8
238207_at	0.602	0.0370227	-2.26472	-3.5714	-0.172169	SMIM4	small integral membrane protein 4
225014_at	0.588	0.0306075	-2.36011	-3.4273	-0.314525	SMIM20	small integral membrane protein 20
224740_at	0.582	0.0289533	2.38773	-3.3851	0.268077	SMIM15	small integral membrane protein 15
227909_at	0.591	0.0334499	-2.31574	-3.4946	-0.288962	SMIM10L2B///SMIM10L2A	small integral membrane protein 10 like 2B///small integral membrane protein 10 like 2A
223188_at	0.5	0.00591088	-3.14879	-2.1673	-0.249224	SMG9	SMG9, nonsense mediated mRNA decay factor
238449_at	0.614	0.0435802	-2.18193	-3.6943	-0.207002	SMG1P5	SMG1P5, nonsense mediated mRNA decay associated PI3K related kinase pseudogene 5
212569_at	0.618	0.0462098	2.15193	-3.7384	0.441975	SMCHD1	structural maintenance of chromosomes flexible hinge domain containing 1
236016_at	0.611	0.0403232	2.22149	-3.6359	0.306391	SMARCE1	SWI/SNF related, matrix associated, actin dependent regulator of chromatin, subfamily e, member 1
204099_at	0.593	0.0345773	-2.29911	-3.5197	-0.158391	SMARCD3	SWI/SNF related, matrix associated, actin dependent regulator of chromatin, subfamily d, member 3
212258_s_at	0.582	0.0273	-2.41686	-3.3404	-0.185255	SMARCA2	SWI/SNF related, matrix associated, actin dependent regulator of chromatin, subfamily a, member 2
215294_s_at	0.556	0.0132232	2.76878	-2.7859	0.574458	SMARCA1	SWI/SNF related, matrix associated, actin dependent regulator of chromatin, subfamily a, member 1
209679_s_at	0.621	0.0479521	2.1329	-3.7661	0.434413	SMAGP	small cell adhesion glycoprotein
220263_at	0.332	0.00012601	4.9461	0.7094	0.408317	SMAD5-AS1	SMAD5 antisense RNA 1
235451_at	0.519	0.00889746	2.95682	-2.4815	0.735089	SMAD5	SMAD family member 5
202526_at	0.5	0.0040778	3.32175	-1.8825	0.313072	SMAD4	SMAD family member 4
218284_at	0.507	0.00710737	3.06248	-2.3089	0.682044	SMAD3	SMAD family member 3
210993_s_at	0.613	0.0409228	2.21399	-3.647	0.513335	SMAD1	SMAD family member 1
232147_at	0.497	0.00368181	-3.36919	-1.8043	-0.245033	SLX4	SLX4 structure-specific endonuclease subunit
209607_x_at	0.591	0.032586	-2.32884	-3.4748	-0.566195	SLX1B-SULT1A4///SLX1A-SULT1A3///SULT1A4///SULT1A3	SLX1B-SULT1A4 readthrough (NMD candidate)///SLX1A-SULT1A3 readthrough (NMD candidate)///sulfotransferase family 1A member 4///sulfotransferase family 1A member 3
227990_at	0.618	0.0465455	2.14821	-3.7438	0.227378	SLU7	SLU7 homolog, splicing factor
203021_at	0.593	0.0343868	-2.30189	-3.5156	-0.577562	SLPI	secretory leukocyte peptidase inhibitor
225243_s_at	0.614	0.0414337	2.20768	-3.6563	0.283676	SLMAP	sarcolemma associated protein
236734_at	0.558	0.0170078	-2.64793	-2.9789	-0.207076	SLITRK1	SLIT and NTRK like family member 1
228850_s_at	0.593	0.0345939	-2.29887	-3.5201	-0.166701	SLIT2	slit guidance ligand 2
230383_x_at	0.558	0.0181354	-2.6169	-3.0281	-0.260676	SLFN5	schlafen family member 5
219885_at	0.587	0.0304799	-2.36218	-3.4241	-0.132239	SLFN12	schlafen family member 12
219911_s_at	0.515	0.00841709	2.98298	-2.4388	0.480411	SLCO4A1	solute carrier organic anion transporter family member 4A1
204368_at	0.558	0.0173988	-2.63695	-2.9963	-0.274169	SLCO2A1	solute carrier organic anion transporter family member 2A1
210366_at	0.458	0.00210173	3.62887	-1.3763	0.85366	SLCO1B1	solute carrier organic anion transporter family member 1B1
1559092_at	0.469	0.00244154	-3.55953	-1.4904	-0.224324	SLC9A5	solute carrier family 9 member A5
215979_s_at	0.625	0.0499867	-2.11147	-3.7972	-0.185415	SLC7A1	solute carrier family 7 member 1
233287_at	0.581	0.0264501	-2.43249	-3.3163	-0.203391	SLC6A17	solute carrier family 6 member 17
206376_at	0.617	0.0444525	-2.1718	-3.7092	-0.133352	SLC6A15	solute carrier family 6 member 15
213164_at	0.593	0.0344083	-2.30158	-3.516	-0.622063	SLC5A3	solute carrier family 5 member 3
229230_at	0.469	0.00235908	-3.57543	-1.4643	-0.926292	SLC51A	solute carrier family 51 alpha subunit
203908_at	0.571	0.0207586	2.5513	-3.1314	0.339344	SLC4A4	solute carrier family 4 member 4
228486_at	0.579	0.0246186	-2.46784	-3.2616	-0.352401	SLC44A1	solute carrier family 44 member 1
223798_at	0.378	0.00047184	4.32195	-0.2534	0.726088	SLC41A2	solute carrier family 41 member 2
205799_s_at	0.507	0.0073052	3.0496	-2.33	1.76524	SLC3A1	solute carrier family 3 member 1
56821_at	0.504	0.00638641	-3.1126	-2.2267	-0.334908	SLC38A7	solute carrier family 38 member 7
202830_s_at	0.619	0.0471043	2.14208	-3.7527	0.284094	SLC37A4	solute carrier family 37 member 4
223304_at	0.618	0.0465444	2.14823	-3.7438	0.341231	SLC37A3	solute carrier family 37 member 3
209713_s_at	0.609	0.0396478	2.23006	-3.6231	0.336442	SLC35D1	solute carrier family 35 member D1
219447_s_at	0.61	0.0401037	-2.22426	-3.6318	-0.196112	SLC35C2	solute carrier family 35 member C2
225882_at	0.599	0.0353903	-2.28743	-3.5373	-0.299278	SLC35B4	solute carrier family 35 member B4
235013_at	0.552	0.0126857	2.78859	-2.754	0.332307	SLC31A1	solute carrier family 31 member 1
202614_at	0.416	0.0011572	3.90496	-0.9242	0.349332	SLC30A9	solute carrier family 30 member 9
228181_at	0.5	0.00404384	3.32564	-1.8761	0.97604	SLC30A1	solute carrier family 30 member 1
202497_x_at	0.58	0.0260052	2.44086	-3.3034	0.62002	SLC2A3	solute carrier family 2 member 3
216236_s_at	0.621	0.0483322	2.12884	-3.772	0.566931	SLC2A14///SLC2A3	solute carrier family 2 member 14///solute carrier family 2 member 3
227176_at	0.407	0.00102853	3.95956	-0.8354	0.650607	SLC2A13	solute carrier family 2 member 13
219344_at	0.606	0.0380696	-2.25063	-3.5925	-0.271672	SLC29A3	solute carrier family 29 member 3
205768_s_at	0.538	0.0110335	2.855	-2.6468	0.413767	SLC27A2	solute carrier family 27 member 2
232092_at	0.507	0.00679257	3.08372	-2.2741	0.183659	SLC25A51	solute carrier family 25 member 51
205716_at	0.565	0.0198702	2.57259	-3.098	0.190232	SLC25A40	solute carrier family 25 member 40
223698_at	0.596	0.0350039	2.29295	-3.529	0.136757	SLC25A36	solute carrier family 25 member 36
1559977_a_at	0.578	0.0235016	-2.49064	-3.2262	-0.330074	SLC25A34	solute carrier family 25 member 34
221432_s_at	0.558	0.0174475	2.63561	-2.9985	0.558174	SLC25A28	solute carrier family 25 member 28
225212_at	0.548	0.0118163	-2.82242	-2.6995	-0.642799	SLC25A25	solute carrier family 25 member 25
214210_at	0.5	0.00551572	3.1811	-2.1141	0.256347	SLC25A17	solute carrier family 25 member 17
57588_at	0.614	0.0434553	-2.1834	-3.6922	-0.109626	SLC24A3	solute carrier family 24 member 3
219418_at	0.497	0.00372527	-3.36374	-1.8132	-0.454932	SLC23A3///NHEJ1	solute carrier family 23 member 3///non-homologous end joining factor 1
231625_at	0.599	0.0358012	2.28163	-3.5461	0.538804	SLC22A9	solute carrier family 22 member 9
218675_at	0.617	0.0447472	-2.16842	-3.7142	-0.202312	SLC22A17	solute carrier family 22 member 17
232233_at	0.5	0.00439501	-3.28692	-1.9399	-0.159594	SLC22A16	solute carrier family 22 member 16
207201_s_at	0.556	0.0142775	2.73208	-2.8447	0.423821	SLC22A1	solute carrier family 22 member 1
201920_at	0.593	0.0342827	2.30341	-3.5133	0.730647	SLC20A1	solute carrier family 20 member 1
206396_at	0.5	0.00503345	3.22378	-2.0439	0.915208	SLC1A1	solute carrier family 1 member 1
211576_s_at	0.62	0.0478207	2.13432	-3.7641	0.409123	SLC19A1	solute carrier family 19 member 1
204229_at	0.623	0.0492684	-2.11895	-3.7864	-0.169748	SLC17A7	solute carrier family 17 member 7
1565925_at	0.579	0.0244784	-2.47065	-3.2573	-0.128045	SLC17A4	solute carrier family 17 member 4
241866_at	0.607	0.0382965	-2.24763	-3.597	-0.222295	SLC16A7	solute carrier family 16 member 7
230748_at	0.582	0.0291354	2.38462	-3.3898	0.582077	SLC16A6	solute carrier family 16 member 6
236220_at	0.614	0.0423375	-2.19669	-3.6726	-0.420877	SLC16A10	solute carrier family 16 member 10
205244_s_at	0.588	0.0308633	-2.35596	-3.4336	-0.322902	SLC13A3	solute carrier family 13 member 3
209402_s_at	0.588	0.0313833	-2.34763	-3.4463	-0.180384	SLC12A4	solute carrier family 12 member 4
203124_s_at	0.59	0.0321244	-2.33597	-3.464	-0.437646	SLC11A2	solute carrier family 11 member 2
219159_s_at	0.607	0.0384578	2.2455	-3.6001	0.18368	SLAMF7	SLAM family member 7
225619_at	0.614	0.042161	2.19882	-3.6694	0.314204	SLAIN1	SLAIN motif family member 1
203761_at	0.591	0.0330141	2.32231	-3.4847	0.734513	SLA	Src-like-adaptor
203625_x_at	0.538	0.0111082	-2.85179	-2.652	-0.562226	SKP2	S-phase kinase-associated protein 2, E3 ubiquitin protein ligase
1559266_s_at	0.557	0.0161571	-2.67267	-2.9396	-0.30544	SKIDA1	SKI/DACH domain containing 1
205790_at	0.476	0.00307245	-3.4531	-1.6659	-0.609765	SKAP1	src kinase associated phosphoprotein 1
1554624_a_at	0.601	0.0365734	2.27088	-3.5622	0.266683	SIRPB1	signal regulatory protein beta 1
1559469_s_at	0.586	0.0297721	2.37388	-3.4063	0.148579	SIPA1L2	signal induced proliferation associated 1 like 2
225135_at	0.578	0.023824	2.48396	-3.2366	0.48771	SIN3A	SIN3 transcription regulator family member A
209339_at	0.557	0.0161887	-2.67173	-2.9411	-0.524693	SIAH2	siah E3 ubiquitin protein ligase 2
204967_at	0.621	0.0484864	-2.1272	-3.7744	-0.345355	SHROOM2	shroom family member 2
229485_x_at	0.557	0.016145	-2.67303	-2.939	-0.180106	SHISA3	shisa family member 3
238036_at	0.485	0.00326191	-3.42536	-1.7116	-0.320375	SHE	Src homology 2 domain containing E
215689_s_at	0.609	0.0396449	-2.2301	-3.6231	-0.805427	SHBG	sex hormone binding globulin
229698_at	0.556	0.0142293	-2.7337	-2.8421	-0.222893	SHANK3	SH3 and multiple ankyrin repeat domains 3
229832_x_at	0.558	0.0177899	-2.62621	-3.0133	-0.250699	SH3TC1	SH3 domain and tetratricopeptide repeats 1
243582_at	0.578	0.0228207	-2.50505	-3.2038	-0.343674	SH3RF2	SH3 domain containing ring finger 2
209090_s_at	0.591	0.0327075	2.32698	-3.4776	0.262006	SH3GLB1	SH3 domain containing GRB2 like endophilin B1
201811_x_at	0.565	0.0196987	2.5768	-3.0913	0.440753	SH3BP5	SH3 domain binding protein 5
219749_at	0.403	0.00099079	-3.97688	-0.8073	-0.468197	SH2D4A	SH2 domain containing 4A
203320_at	0.5	0.00458691	3.26704	-1.9727	0.706942	SH2B3	SH2B adaptor protein 3
230165_at	0.557	0.0150066	-2.70819	-2.8829	-0.18144	SGO2	shugoshin 2
227038_at	0.557	0.0159205	2.67977	-2.9283	1.82772	SGMS2	sphingomyelin synthase 2
201739_at	0.496	0.00346899	3.39682	-1.7587	1.61205	SGK1	serum/glucocorticoid regulated kinase 1
204688_at	0.389	0.00061114	4.2013	-0.4456	1.22976	SGCE	sarcoglycan epsilon
214492_at	0.451	0.00194569	-3.66455	-1.3176	-0.215443	SGCD	sarcoglycan delta
205120_s_at	0.576	0.0222115	2.51828	-3.1831	0.646407	SGCB	sarcoglycan beta
218835_at	0.582	0.0281803	-2.40115	-3.3645	-0.187286	SFTPA2///SFTPA1	surfactant protein A2///surfactant protein A1
236027_at	0.618	0.0463231	-2.15067	-3.7402	-0.262049	SFR1	SWI5 dependent homologous recombination repair protein 1
201965_s_at	0.552	0.0127456	2.78634	-2.7576	0.35086	SETX	senataxin
235339_at	0.557	0.0154285	-2.69487	-2.9042	-0.506653	SETDB2	SET domain bifurcated 2
222575_at	0.621	0.0486614	-2.12534	-3.7771	-0.189655	SETD5	SET domain containing 5
212465_at	0.44	0.00176859	3.70869	-1.2452	0.282346	SETD3	SET domain containing 3
227478_at	0.522	0.00932102	2.93486	-2.5172	0.723098	SETBP1	SET binding protein 1
1553869_at	0.619	0.0471569	-2.14151	-3.7536	-0.130962	SESN3	sestrin 3
207714_s_at	0.416	0.00124889	-3.86966	-0.9817	-0.624775	SERPINH1	serpin family H member 1
202283_at	0.523	0.00969891	2.91608	-2.5478	0.324925	SERPINF1	serpin family F member 1
239186_at	0.403	0.00099594	3.97448	-0.8112	0.317088	SERPINB9P1	serpin family B member 9 pseudogene 1
209723_at	0.557	0.016471	2.6634	-2.9543	1.5351	SERPINB9	serpin family B member 9
206034_at	0.586	0.029998	2.37012	-3.412	0.806432	SERPINB8	serpin family B member 8
214243_s_at	0.618	0.0463707	2.15015	-3.741	0.202003	SERHL2///SERHL	serine hydrolase-like 2///serine hydrolase-like (pseudogene)
228129_at	0.572	0.0211876	2.54133	-3.147	0.285004	SERBP1	SERPINE1 mRNA binding protein 1
228398_at	0.556	0.0135238	-2.75804	-2.8031	-0.271802	SENP8	SUMO/sentrin peptidase family member, NEDD8 specific
203528_at	0.618	0.0458992	2.15539	-3.7333	0.357416	SEMA4D	semaphorin 4D
46665_at	0.558	0.0178172	2.62547	-3.0145	0.430943	SEMA4C	semaphorin 4C
234725_s_at	0.556	0.0130846	2.77381	-2.7778	0.766012	SEMA4B	semaphorin 4B
225561_at	0.332	0.0002313	4.65697	0.2705	0.41143	SELT	selenoprotein T
204563_at	0.528	0.00994074	2.90443	-2.5667	1.47079	SELL	selectin L
234018_s_at	0.403	0.00087426	-4.03491	-0.7133	-0.279142	SEL1L2	SEL1L2 ERAD E3 ligase adaptor subunit
223225_s_at	0.576	0.0223412	2.51544	-3.1876	0.482387	SEH1L	SEH1 like nucleoporin
1552789_at	0.609	0.0391951	2.23589	-3.6145	0.295355	SEC62	SEC62 homolog, preprotein translocation factor
217716_s_at	0.619	0.0466822	-2.14671	-3.746	-0.355027	SEC61A1	Sec61 translocon alpha 1 subunit
202361_at	0.618	0.0462174	-2.15185	-3.7385	-0.350173	SEC24C	SEC24 homolog C, COPII coat complex component
202798_at	0.618	0.0459004	2.15538	-3.7333	0.46018	SEC24B	SEC24 homolog B, COPII coat complex component
212902_at	0.476	0.00299416	3.46506	-1.6461	0.641781	SEC24A	SEC24 homolog A, COPII coat complex component
233020_at	0.6	0.0359173	2.28	-3.5485	0.157819	SEC22B	SEC22 homolog B, vesicle trafficking protein (gene/pseudogene)
218703_at	0.531	0.0101706	-2.89361	-2.5843	-0.269407	SEC22A	SEC22 homolog A, vesicle trafficking protein
202083_s_at	0.556	0.0129534	2.77862	-2.77	0.877573	SEC14L1	SEC14 like lipid binding 1
216591_s_at	0.59	0.0318854	2.3397	-3.4583	0.568357	SDHC	succinate dehydrogenase complex subunit C
217855_x_at	0.593	0.0343678	-2.30217	-3.5151	-0.247257	SDF4	stromal cell derived factor 4
1553338_at	0.579	0.0245965	2.46828	-3.2609	0.463777	SDE2	SDE2 telomere maintenance homolog
227785_at	0.611	0.040291	-2.2219	-3.6353	-0.297055	SDCCAG8	serologically defined colon cancer antigen 8
200958_s_at	0.58	0.0257712	2.44532	-3.2965	0.442323	SDCBP	syndecan binding protein
202071_at	0.5	0.00497389	3.22932	-2.0348	1.18415	SDC4	syndecan 4
212157_at	0.614	0.0436728	2.18085	-3.6959	0.226925	SDC2	syndecan 2
201287_s_at	0.578	0.0235679	-2.48926	-3.2283	-0.283562	SDC1	syndecan 1
212556_at	0.606	0.0382012	-2.24889	-3.5951	-0.267487	SCRIB	scribbled planar cell polarity protein
201339_s_at	0.541	0.0113033	2.84352	-2.6654	0.229658	SCP2	sterol carrier protein 2
224786_at	0.591	0.0327306	2.32663	-3.4782	0.327984	SCOC	short coiled-coil protein
223221_at	0.58	0.0259006	2.44285	-3.3003	0.248438	SCO1	SCO1 cytochrome c oxidase assembly protein
228504_at	0.556	0.0145047	-2.72451	-2.8568	-0.324481	SCN7A	sodium voltage-gated channel alpha subunit 7
218793_s_at	0.469	0.00245601	3.5568	-1.4949	0.321387	SCML1	sex comb on midleg-like 1 (Drosophila)
221575_at	0.205	1.498e-05	-5.99781	2.1855	-0.964201	SCLY	selenocysteine lyase
237748_at	0.557	0.0146414	-2.72001	-2.864	-0.194095	SCGB2B2	secretoglobin family 2B member 2
200832_s_at	0.507	0.00752178	3.03588	-2.3524	1.25498	SCD	stearoyl-CoA desaturase
223842_s_at	0.56	0.0184049	-2.60976	-3.0394	-0.245847	SCARA3	scavenger receptor class A member 3
230612_at	0.609	0.0387834	-2.24123	-3.6065	-0.160403	SCAND2P	SCAN domain containing 2 pseudogene
218143_s_at	0.579	0.0246105	-2.468	-3.2614	-0.302188	SCAMP2	secretory carrier membrane protein 2
243759_at	0.609	0.0395326	2.23154	-3.6209	0.341763	SCAF4	SR-related CTD associated factor 4
206989_s_at	0.582	0.0290219	2.38656	-3.3869	0.346568	SCAF11	SR-related CTD associated factor 11
225500_x_at	0.556	0.0142533	-2.73289	-2.8434	-0.216559	SCAF1	SR-related CTD associated factor 1
235209_at	0.52	0.00920048	-2.94101	-2.5072	-0.233192	SBSPON	somatomedin B and thrombospondin type 1 domain containing
222741_s_at	0.623	0.0492311	-2.11934	-3.7858	-0.26397	SAYSD1	SAYSVFN motif domain containing 1
213988_s_at	0.378	0.00043048	4.36484	-0.1855	0.828541	SAT1	spermidine/spermine N1-acetyltransferase 1
1554482_a_at	0.613	0.0409696	2.21341	-3.6478	0.311142	SAR1B	secretion associated Ras related GTPase 1B
217965_s_at	0.557	0.0146303	2.72038	-2.8635	0.280393	SAP30BP	SAP30 binding protein
220330_s_at	0.591	0.0335201	2.31469	-3.4962	1.38162	SAMSN1	SAM domain, SH3 domain and nuclear localization signals 1
228653_at	0.469	0.00244795	-3.55832	-1.4924	-0.66677	SAMD5	sterile alpha motif domain containing 5
212845_at	0.519	0.00872449	2.96608	-2.4664	0.541777	SAMD4A	sterile alpha motif domain containing 4A
227773_at	0.617	0.0452844	-2.16231	-3.7232	-0.184899	SAMD10	sterile alpha motif domain containing 10
213283_s_at	0.592	0.0340793	-2.3064	-3.5088	-0.197368	SALL2	spalt like transcription factor 2
206893_at	0.427	0.00148386	3.78988	-1.1121	0.82976	SALL1	spalt like transcription factor 1
205449_at	0.578	0.0232383	-2.49616	-3.2176	-0.462001	SAC3D1	SAC3 domain containing 1
227684_at	0.582	0.0287263	2.39164	-3.3791	0.260761	S1PR2	sphingosine-1-phosphate receptor 2
204642_at	0.6	0.0360951	2.27751	-3.5522	0.302512	S1PR1	sphingosine-1-phosphate receptor 1
1554876_a_at	0.606	0.0382246	-2.24858	-3.5955	-0.145909	S100Z	S100 calcium binding protein Z
203535_at	0.572	0.0211641	2.54187	-3.1462	1.37399	S100A9	S100 calcium binding protein A9
202917_s_at	0.572	0.0210738	2.54396	-3.1429	1.74054	S100A8	S100 calcium binding protein A8
205863_at	0.558	0.017797	2.62602	-3.0136	1.91161	S100A12	S100 calcium binding protein A12
214044_at	0.59	0.0317768	-2.34141	-3.4557	-0.150948	RYR2	ryanodine receptor 2
238206_at	0.614	0.0419601	-2.20126	-3.6658	-0.142064	RXFP1	relaxin/insulin like family peptide receptor 1
229786_at	0.556	0.014167	-2.7358	-2.8388	-0.300095	RWDD2A	RWD domain containing 2A
228827_at	0.593	0.0342624	-2.30371	-3.5128	-0.399137	RUNX1T1	RUNX1 translocation partner 1
235040_at	0.507	0.00761292	-3.03022	-2.3617	-0.211915	RUNDC1	RUN domain containing 1
1552569_a_at	0.507	0.00724564	-3.05344	-2.3237	-1.35529	RTP3	receptor transporter protein 3
210968_s_at	0.5	0.00461436	3.26426	-1.9772	0.473978	RTN4	reticulon 4
212301_at	0.619	0.0471785	2.14127	-3.7539	0.208791	RTF1	RTF1 homolog, Paf1/RNA polymerase II complex component
229810_at	0.572	0.0209496	-2.54684	-3.1384	-0.281035	RSPH3	radial spoke 3 homolog
217915_s_at	0.575	0.0218953	2.52529	-3.1722	0.529379	RSL24D1	ribosomal L24 domain containing 1
232221_x_at	0.515	0.00821289	-2.99454	-2.42	-0.256146	RSBN1L	round spermatid basic protein 1 like
218307_at	0.621	0.0481301	-2.131	-3.7689	-0.369665	RSAD1	radical S-adenosyl methionine domain containing 1
214764_at	0.57	0.0206159	2.55466	-3.1261	0.340476	RRP15	ribosomal RNA processing 15 homolog
208456_s_at	0.558	0.0174288	2.63612	-2.9976	0.492804	RRAS2	related RAS viral (r-ras) oncogene homolog 2
1555916_at	0.556	0.0141083	-2.73779	-2.8356	-0.332402	RPUSD3	RNA pseudouridylate synthase domain containing 3
226660_at	0.538	0.0110025	2.85633	-2.6447	0.374235	RPS6KB1	ribosomal protein S6 kinase B1
204633_s_at	0.456	0.00204405	3.64175	-1.3551	1.27205	RPS6KA5	ribosomal protein S6 kinase A5
204906_at	0.557	0.016592	-2.65987	-2.9599	-0.286129	RPS6KA2	ribosomal protein S6 kinase A2
1566720_at	0.59	0.0317437	-2.34193	-3.4549	-0.190114	RPS10P7	ribosomal protein S10 pseudogene 7
225403_at	0.427	0.00161712	-3.75011	-1.1772	-0.457859	RPP25L	ribonuclease P/MRP subunit p25 like
213491_x_at	0.614	0.0433285	-2.18489	-3.69	-0.30047	RPN2	ribophorin II
213459_at	0.591	0.0336988	2.31203	-3.5002	0.578798	RPL37A	ribosomal protein L37a
243201_at	0.582	0.0284529	2.39638	-3.3718	0.159123	RPL36A	ribosomal protein L36a
238026_at	0.591	0.033285	-2.31822	-3.4909	-0.23827	RPL35A	ribosomal protein L35a
224957_at	0.389	0.00056533	4.23761	-0.3876	0.300605	RPL17-C18orf32///C18orf32///RPL17	RPL17-C18orf32 readthrough///chromosome 18 open reading frame 32///ribosomal protein L17
217559_at	0.582	0.0278664	2.4067	-3.356	0.154024	RPL10L	ribosomal protein L10 like
213959_s_at	0.558	0.0169277	-2.65021	-2.9753	-0.138151	RPGRIP1L	RPGRIP1 like
207624_s_at	0.5	0.00568178	3.16725	-2.1369	0.474705	RPGR	retinitis pigmentosa GTPase regulator
218441_s_at	0.537	0.010842	-2.86331	-2.6334	-0.393452	RPAP1	RNA polymerase II associated protein 1
228288_at	0.588	0.0309517	-2.35453	-3.4358	-0.169167	RPAIN	RPA interacting protein
205191_at	0.556	0.0132075	2.76935	-2.7849	0.596362	RP2	retinitis pigmentosa 2 (X-linked recessive)
223824_at	0.5	0.00582905	3.1553	-2.1566	0.289256	RNLS	renalase, FAD dependent amine oxidase
212696_s_at	0.476	0.00298886	3.46588	-1.6448	0.35154	RNF4	ring finger protein 4
222683_at	0.579	0.0248632	-2.46298	-3.2692	-0.489804	RNF20	ring finger protein 20
205215_at	0.591	0.0333508	2.31723	-3.4924	0.190295	RNF2	ring finger protein 2
230662_at	0.621	0.048626	-2.12571	-3.7766	-0.149012	RNF187	ring finger protein 187
230720_at	0.614	0.0416611	2.2049	-3.6605	0.12264	RNF182	ring finger protein 182
1569775_at	0.619	0.0476043	-2.13665	-3.7607	-0.215407	RNF157	ring finger protein 157
225414_at	0.557	0.0147966	2.71495	-2.8721	0.62169	RNF149	ring finger protein 149
235549_at	0.623	0.0495037	2.11649	-3.79	0.338376	RNF144B	ring finger protein 144B
218738_s_at	0.507	0.00702306	3.06808	-2.2997	0.422372	RNF138	ring finger protein 138
223592_s_at	0.613	0.0408781	-2.21455	-3.6462	-0.268219	RNF135	ring finger protein 135
1559537_at	0.572	0.0213585	-2.53741	-3.1532	-0.162945	RNF130	ring finger protein 130
235199_at	0.557	0.0165475	2.66117	-2.9579	1.08385	RNF125	ring finger protein 125
206111_at	0.558	0.0171463	2.64402	-2.9851	0.364392	RNASE2	ribonuclease A family member 2
1562633_at	0.582	0.0288551	-2.38942	-3.3825	-0.12813	RMST	rhabdomyosarcoma 2 associated transcript (non-protein coding)
212482_at	0.607	0.0383505	2.24691	-3.598	0.229506	RMND5A	required for meiotic nuclear division 5 homolog A
235349_at	0.505	0.00657091	3.09926	-2.2486	0.256984	RMDN2	regulator of microtubule dynamics 2
1560291_at	0.564	0.0192053	-2.58912	-3.0719	-0.205458	RIPPLY1	ripply transcriptional repressor 1
234730_s_at	0.421	0.00143865	3.8042	-1.0887	1.145	RIPK4	receptor interacting serine/threonine kinase 4
209545_s_at	0.395	0.00081191	4.06924	-0.6578	0.760505	RIPK2	receptor interacting serine/threonine kinase 2
209941_at	0.558	0.018047	2.61927	-3.0243	0.538479	RIPK1	receptor interacting serine/threonine kinase 1
209684_at	0.599	0.0356331	2.28399	-3.5425	0.57118	RIN2	Ras and Rab interactor 2
231705_at	0.558	0.0180056	2.62038	-3.0226	0.451418	RIDA	reactive intermediate imine deaminase A homolog
226221_at	0.507	0.00672656	3.0883	-2.2666	0.290838	RIC1	RIC1 homolog, RAB6A GEF complex partner 1
227196_at	0.581	0.0265451	2.43072	-3.319	0.508423	RHPN2	rhophilin Rho GTPase binding protein 2
1559582_at	0.547	0.0117885	-2.82354	-2.6977	-0.207517	RHOQ	ras homolog family member Q
243481_at	0.556	0.0132106	-2.76924	-2.7851	-0.197413	RHOJ	ras homolog family member J
1553713_a_at	0.609	0.0395798	-2.23093	-3.6218	-0.183743	RHEBL1	Ras homolog enriched in brain like 1
233232_at	0.6	0.0359433	-2.27963	-3.5491	-0.184126	RHBDL3	rhomboid like 3
204402_at	0.507	0.00764658	-3.02815	-2.3651	-0.323111	RHBDD3	rhomboid domain containing 3
204337_at	0.588	0.031433	-2.34684	-3.4475	-0.572108	RGS4	regulator of G-protein signaling 4
220300_at	0.614	0.0419049	-2.20193	-3.6648	-0.272104	RGS3	regulator of G-protein signaling 3
1558623_at	0.599	0.0358362	-2.28113	-3.5468	-0.17192	RGPD4-AS1	RGPD4 antisense RNA 1 (head to head)
227340_s_at	0.619	0.0474028	-2.13883	-3.7575	-0.386092	RGMB	repulsive guidance molecule family member b
209568_s_at	0.617	0.0444736	2.17156	-3.7096	0.206381	RGL1	ral guanine nucleotide dissociation stimulator like 1
218723_s_at	0.557	0.01462	2.72071	-2.8629	1.69931	RGCC	regulator of cell cycle
226872_at	0.576	0.0220741	2.52132	-3.1784	0.684824	RFX2	regulatory factor X2
212646_at	0.562	0.0187639	2.6004	-3.0541	0.534689	RFTN1	raftlin, lipid raft linker 1
226060_at	0.623	0.0494234	-2.11732	-3.7887	-0.266783	RFT1	RFT1 homolog
212920_at	0.571	0.0208182	2.5499	-3.1336	0.354078	REST	RE1 silencing transcription factor
221643_s_at	0.593	0.0344919	2.30036	-3.5179	0.19017	RERE	arginine-glutamic acid dipeptide repeats
242571_at	0.515	0.00840679	2.98356	-2.4379	0.29493	REPS2	RALBP1 associated Eps domain containing 2
210300_at	0.576	0.0221794	-2.51899	-3.182	-0.252272	REM1	RRAD and GEM like GTPase 1
205205_at	0.579	0.0250835	2.45864	-3.2759	0.498001	RELB	RELB proto-oncogene, NF-kB subunit
205886_at	0.609	0.0390704	-2.2375	-3.6121	-0.166931	REG1B	regenerating family member 1 beta
209752_at	0.591	0.0323153	-2.33301	-3.4685	-0.181532	REG1A	regenerating family member 1 alpha
204365_s_at	0.416	0.00127347	-3.86064	-0.9965	-0.412567	REEP1	receptor accessory protein 1
236291_at	0.469	0.00263004	-3.52511	-1.5472	-0.239136	RDH5	retinol dehydrogenase 5
225449_at	0.579	0.0250931	-2.45845	-3.2762	-0.159217	RDH13	retinol dehydrogenase 13
242998_at	0.5	0.00555193	-3.17805	-2.1192	-0.715691	RDH12	retinol dehydrogenase 12 (all-trans/9-cis/11-cis)
212612_at	0.5	0.00529839	3.19986	-2.0833	0.595803	RCOR1	REST corepressor 1
222666_s_at	0.389	0.00072176	4.12392	-0.5698	0.988181	RCL1	RNA terminal phosphate cyclase like 1
226488_at	0.614	0.0436526	-2.18108	-3.6956	-0.188043	RCCD1	RCC1 domain containing 1
224578_at	0.619	0.0469078	2.14423	-3.7496	0.339273	RCC2	regulator of chromosome condensation 2
206499_s_at	0.591	0.0335701	-2.31394	-3.4974	-0.286422	RCC1	regulator of chromosome condensation 1
225893_at	0.565	0.019831	2.57355	-3.0965	0.321257	RC3H1	ring finger and CCCH-type domains 1
203423_at	0.591	0.0327109	-2.32693	-3.4777	-0.476202	RBP1	retinol binding protein 1
207208_at	0.617	0.0448071	-2.16773	-3.7152	-0.165408	RBMXL2	RNA binding motif protein, X-linked like 2
222443_s_at	0.557	0.0147354	2.71694	-2.8689	0.367091	RBM8A	RNA binding motif protein 8A
218379_at	0.519	0.00888538	2.95746	-2.4804	0.574683	RBM7	RNA binding motif protein 7
209497_s_at	0.618	0.0463866	-2.14997	-3.7412	-0.315849	RBM4B	RNA binding motif protein 4B
229439_s_at	0.614	0.0436214	2.18145	-3.6951	0.280205	RBM47	RNA binding motif protein 47
208319_s_at	0.578	0.0233	2.49486	-3.2196	1.0098	RBM3	RNA binding motif (RNP1, RRM) protein 3
212031_at	0.562	0.0187529	2.60068	-3.0537	0.342444	RBM25	RNA binding motif protein 25
235004_at	0.526	0.0098956	-2.90658	-2.5632	-0.227052	RBM24	RNA binding motif protein 24
225236_at	0.556	0.0143272	2.73041	-2.8474	0.327555	RBM18	RNA binding motif protein 18
224780_at	0.586	0.0298101	2.37324	-3.4072	0.357256	RBM17	RNA binding motif protein 17
1555760_a_at	0.507	0.00749733	3.03741	-2.3499	0.610518	RBM15	RNA binding motif protein 15
204178_s_at	0.602	0.036963	-2.26553	-3.5702	-0.313894	RBM14	RNA binding motif protein 14
215089_s_at	0.623	0.0496018	-2.11546	-3.7914	-0.359082	RBM10	RNA binding motif protein 10
226696_at	0.562	0.0187447	2.6009	-3.0534	0.31068	RBBP9	RB binding protein 9, serine hydrolase
203344_s_at	0.623	0.0495412	2.1161	-3.7905	0.546769	RBBP8	RB binding protein 8, endonuclease
230439_at	0.614	0.0423304	-2.19678	-3.6725	-0.161699	RBAKDN	RBAK downstream neighbor (non-protein coding)
228571_at	0.614	0.0436206	2.18146	-3.695	0.342528	RBAK	RB associated KRAB zinc finger
223425_at	0.609	0.039323	-2.23423	-3.6169	-0.184684	RAVER1	ribonucleoprotein, PTB binding 1
1554834_a_at	0.551	0.0120844	2.81174	-2.7167	0.561567	RASSF5	Ras association domain family member 5
227167_s_at	0.61	0.039921	2.22658	-3.6283	0.741561	RASSF3	Ras association domain family member 3
225562_at	0.619	0.0474413	-2.13842	-3.7581	-0.189556	RASA3	RAS p21 protein activator 3
204680_s_at	0.557	0.0165907	-2.65991	-2.9599	-0.186084	RAPGEF5	Rap guanine nucleotide exchange factor 5
1563528_at	0.622	0.0489831	-2.12194	-3.782	-0.137425	RAPGEF4-AS1	RAPGEF4 antisense RNA 1
203097_s_at	0.581	0.0266075	2.42956	-3.3208	0.366821	RAPGEF2	Rap guanine nucleotide exchange factor 2
218669_at	0.451	0.00194853	3.66388	-1.3187	0.419319	RAP2C	RAP2C, member of RAS oncogene family
209444_at	0.507	0.00747662	-3.03871	-2.3478	-0.428345	RAP1GDS1	Rap1 GTPase-GDP dissociation stimulator 1
200833_s_at	0.451	0.00192618	3.66922	-1.31	0.552984	RAP1B	RAP1B, member of RAS oncogene family
226922_at	0.558	0.0177335	2.62775	-3.0109	0.646891	RANBP2	RAN binding protein 2
204916_at	0.5	0.00399658	-3.3311	-1.8671	-0.753369	RAMP1	receptor activity modifying protein 1
230294_at	0.601	0.0366863	-2.26932	-3.5645	-0.171575	RALY-AS1	RALY antisense RNA 1
227224_at	0.557	0.0153196	2.69827	-2.8988	0.39452	RALGPS2	Ral GEF with PH domain and SH3 binding motif 2
209050_s_at	0.556	0.0135863	2.75583	-2.8066	1.48317	RALGDS	ral guanine nucleotide dissociation stimulator
214855_s_at	0.592	0.0342032	2.30458	-3.5115	0.202522	RALGAPA1///RALGAPA1P1	Ral GTPase activating protein catalytic alpha subunit 1///Ral GTPase activating protein catalytic alpha subunit 1 pseudogene 1
202052_s_at	0.605	0.0375653	-2.25737	-3.5824	-0.453514	RAI14	retinoic acid induced 14
219494_at	0.619	0.047364	-2.13925	-3.7569	-0.285359	RAD54B	RAD54 homolog B (S. cerevisiae)
223598_at	0.332	0.00027051	4.58302	0.1562	0.548317	RAD23B	RAD23 homolog B, nucleotide excision repair protein
207419_s_at	0.58	0.0256782	2.4471	-3.2937	0.532303	RAC2	ras-related C3 botulinum toxin substrate 2 (rho family, small GTP binding protein Rac2)
1567458_s_at	0.581	0.026407	2.4333	-3.315	0.463864	RAC1	ras-related C3 botulinum toxin substrate 1 (rho family, small GTP binding protein Rac1)
226090_x_at	0.567	0.0201814	2.56503	-3.1099	0.203972	RABL3	RAB, member of RAS oncogene family like 3
203150_at	0.579	0.0247686	2.46485	-3.2662	0.464405	RABEPK	Rab9 effector protein with kelch motifs
230266_at	0.582	0.0287969	2.39042	-3.381	0.298228	RAB7B	RAB7B, member RAS oncogene family
206113_s_at	0.5	0.00527792	3.20166	-2.0803	0.92557	RAB5A	RAB5A, member RAS oncogene family
241977_s_at	0.614	0.0419451	2.20144	-3.6656	0.139811	RAB3C	RAB3C, member RAS oncogene family
228161_at	0.601	0.0367176	2.26889	-3.5652	0.19315	RAB32	RAB32, member RAS oncogene family
217764_s_at	0.58	0.0253691	2.45307	-3.2845	0.532788	RAB31	RAB31, member RAS oncogene family
208732_at	0.52	0.00902649	2.95002	-2.4925	0.290651	RAB2A	RAB2A, member RAS oncogene family
219562_at	0.556	0.0136841	2.7524	-2.8122	0.68018	RAB26	RAB26, member RAS oncogene family
218360_at	0.557	0.0149102	2.71128	-2.878	0.454793	RAB22A	RAB22A, member RAS oncogene family
203885_at	0.416	0.00135047	3.83347	-1.0408	0.442947	RAB21	RAB21, member RAS oncogene family
219622_at	0.389	0.00066129	4.1646	-0.5044	0.81256	RAB20	RAB20, member RAS oncogene family
207791_s_at	0.558	0.0172729	2.64046	-2.9907	0.843204	RAB1A	RAB1A, member RAS oncogene family
224787_s_at	0.577	0.022688	2.5079	-3.1993	0.484387	RAB18	RAB18, member RAS oncogene family
200928_s_at	0.579	0.0242327	2.47561	-3.2496	0.294129	RAB14	RAB14, member RAS oncogene family
202252_at	0.5	0.00598512	-3.14295	-2.1768	-0.327918	RAB13	RAB13, member RAS oncogene family
236019_at	0.617	0.0448699	2.16702	-3.7163	0.215973	RAB12	RAB12, member RAS oncogene family
214999_s_at	0.579	0.0250176	-2.45993	-3.2739	-0.213175	RAB11FIP3	RAB11 family interacting protein 3
234998_at	0.558	0.017896	2.62334	-3.0179	0.419876	RAB11A	RAB11A, member RAS oncogene family
202754_at	0.488	0.00331533	-3.41783	-1.724	-0.341831	R3HDM1	R3H domain containing 1
210455_at	0.427	0.00147499	3.79266	-1.1075	0.202113	R3HCC1L	R3H domain and coiled-coil containing 1 like
1560696_x_at	0.547	0.0117637	-2.82454	-2.6961	-0.222762	QTRT2	queuine tRNA-ribosyltransferase accessory subunit 2
205174_s_at	0.591	0.0327749	2.32595	-3.4792	0.775257	QPCT	glutaminyl-peptide cyclotransferase
228540_at	0.558	0.0172475	2.64118	-2.9896	0.474297	QKI	QKI, KH domain containing RNA binding
220209_at	0.592	0.0340573	-2.30672	-3.5083	-0.186065	PYY2	peptide YY, 2 (pseudogene)
211253_x_at	0.551	0.0124207	-2.79866	-2.7378	-0.294169	PYY	peptide YY
224660_at	0.617	0.0449672	2.16591	-3.7179	0.212699	PYURF///PIGY	PIGY upstream reading frame///phosphatidylinositol glycan anchor biosynthesis class Y
212923_s_at	0.599	0.0353026	2.28868	-3.5354	0.412974	PXDC1	PX domain containing 1
209694_at	0.588	0.0311451	2.35143	-3.4405	0.347924	PTS	6-pyruvoyltetrahydropterin synthase
208300_at	0.557	0.0165992	-2.65966	-2.9603	-0.51002	PTPRH	protein tyrosine phosphatase, receptor type H
227126_at	0.515	0.0081298	-2.99933	-2.4121	-0.329985	PTPRG	protein tyrosine phosphatase, receptor type G
204960_at	0.62	0.0477927	-2.13462	-3.7636	-0.192445	PTPRCAP	protein tyrosine phosphatase, receptor type C associated protein
207238_s_at	0.582	0.0289962	2.387	-3.3862	0.883599	PTPRC	protein tyrosine phosphatase, receptor type C
226380_at	0.5	0.00571425	-3.16459	-2.1413	-0.359149	PTPN21	protein tyrosine phosphatase, non-receptor type 21
243410_at	0.557	0.0150734	2.70606	-2.8863	0.791363	PTPN2	protein tyrosine phosphatase, non-receptor type 2
202006_at	0.591	0.0331338	2.3205	-3.4874	0.543538	PTPN12	protein tyrosine phosphatase, non-receptor type 12
223808_s_at	0.5	0.00604455	3.13833	-2.1844	0.320771	PTPMT1///NDUFS3	protein tyrosine phosphatase, mitochondrial 1///NADH:ubiquinone oxidoreductase core subunit S3
216988_s_at	0.613	0.0409864	2.2132	-3.6482	0.309512	PTP4A2	protein tyrosine phosphatase type IVA, member 2
200731_s_at	0.451	0.00194175	3.66549	-1.3161	0.627791	PTP4A1	protein tyrosine phosphatase type IVA, member 1
209944_at	0.585	0.0294564	2.37918	-3.3982	0.470497	PTGR2///ZNF410	prostaglandin reductase 2///zinc finger protein 410
208131_s_at	0.533	0.0105154	-2.87781	-2.6099	-0.453955	PTGIS	prostaglandin I2 (prostacyclin) synthase
211909_x_at	0.556	0.0139337	-2.74375	-2.826	-0.391869	PTGER3	prostaglandin E receptor 3
207650_x_at	0.575	0.0218301	-2.52675	-3.1699	-0.190292	PTGER1	prostaglandin E receptor 1
215492_x_at	0.427	0.00158124	-3.76048	-1.1602	-0.261637	PTCRA	pre T-cell antigen receptor alpha
230129_at	0.582	0.0279518	-2.40518	-3.3583	-0.323787	PSTK	phosphoseryl-tRNA kinase
220635_at	0.614	0.0432177	-2.1862	-3.6881	-0.168828	PSORS1C2	psoriasis susceptibility 1 candidate 2
228217_s_at	0.572	0.0210185	-2.54524	-3.1409	-0.28251	PSMG4	proteasome assembly chaperone 4
1561666_a_at	0.556	0.0142092	-2.73437	-2.8411	-0.282342	PSMG3-AS1	PSMG3 antisense RNA 1 (head to head)
200988_s_at	0.604	0.0374516	-2.2589	-3.5801	-0.178259	PSME3	proteasome activator subunit 3
202753_at	0.609	0.0391128	2.23695	-3.6129	0.336025	PSMD6	proteasome 26S subunit, non-ATPase 6
231828_at	0.476	0.00305956	-3.45505	-1.6627	-1.0481	PSMD5-AS1	PSMD5 antisense RNA 1 (head to head)
202352_s_at	0.576	0.0225041	2.51188	-3.1931	0.477569	PSMD12	proteasome 26S subunit, non-ATPase 12
204279_at	0.591	0.0326785	2.32742	-3.477	0.463853	PSMB9	proteasome subunit beta 9
1555852_at	0.552	0.0126697	2.78919	-2.753	0.543305	PSMB8-AS1	PSMB8 antisense RNA 1 (head to head)
230300_at	0.516	0.00846336	2.9804	-2.443	0.618796	PSMA5	proteasome subunit alpha 5
201316_at	0.427	0.00160535	3.75349	-1.1717	0.454696	PSMA2	proteasome subunit alpha 2
210126_at	0.582	0.0282917	-2.3992	-3.3675	-0.195737	PSG9	pregnancy specific beta-1-glycoprotein 9
238816_at	0.58	0.0253971	2.45252	-3.2853	0.290255	PSEN1	presenilin 1
209586_s_at	0.578	0.0235075	-2.49052	-3.2264	-0.557578	PRUNE1	prune exopolyphosphatase
1555162_at	0.61	0.0401743	-2.22337	-3.6331	-0.142851	PRR5-ARHGAP8///ARHGAP8	PRR5-ARHGAP8 readthrough///Rho GTPase activating protein 8
232972_at	0.5	0.00404321	-3.32571	-1.876	-0.258308	PRR29	proline rich 29
218714_at	0.506	0.0066434	-3.09413	-2.257	-0.384779	PRR14	proline rich 14
203537_at	0.578	0.0239515	-2.48134	-3.2407	-0.42168	PRPSAP2	phosphoribosyl pyrophosphate synthetase associated protein 2
208447_s_at	0.618	0.046027	2.15396	-3.7354	0.518492	PRPS1	phosphoribosyl pyrophosphate synthetase 1
229376_at	0.579	0.0245909	2.46839	-3.2608	0.476331	PROX1	prospero homeobox 1
227315_x_at	0.618	0.0456223	-2.15849	-3.7287	-0.183225	PROSC	proline synthetase cotranscribed homolog (bacterial)
1562378_s_at	0.5	0.00615462	-3.1299	-2.1983	-0.257464	PROM2	prominin 2
234450_at	0.572	0.0213161	2.53838	-3.1517	0.163392	PROKR2	prokineticin receptor 2
232629_at	0.614	0.042638	2.19309	-3.6779	1.10017	PROK2	prokineticin 2
203650_at	0.614	0.0433944	-2.18411	-3.6911	-0.216349	PROCR	protein C receptor
1564520_s_at	0.456	0.00200753	-3.65008	-1.3414	-0.43496	PRMT5	protein arginine methyltransferase 5
216069_at	0.613	0.0408526	-2.21487	-3.6457	-0.134192	PRMT2	protein arginine methyltransferase 2
231981_at	0.507	0.00702039	-3.06826	-2.2994	-0.280331	PRLR	prolactin receptor
209139_s_at	0.507	0.00717557	3.058	-2.3162	0.454223	PRKRA	protein activator of interferon induced protein kinase EIF2AK2
241669_x_at	0.536	0.0107897	-2.8656	-2.6297	-0.396407	PRKD2	protein kinase D2
202178_at	0.5	0.00542849	-3.18854	-2.1019	-0.496323	PRKCZ	protein kinase C zeta
226101_at	0.618	0.046435	2.14943	-3.742	1.03105	PRKCE	protein kinase C epsilon
213010_at	0.469	0.00241737	-3.56414	-1.4829	-0.405178	PRKCDBP	protein kinase C delta binding protein
200605_s_at	0.604	0.0372848	2.26116	-3.5767	0.366787	PRKAR1A	protein kinase cAMP-dependent type I regulatory subunit alpha
201835_s_at	0.619	0.0472167	2.14086	-3.7545	0.351505	PRKAB1	protein kinase AMP-activated non-catalytic subunit beta 1
238489_at	0.496	0.00363096	-3.37565	-1.7936	-0.173869	PRKAA2	protein kinase AMP-activated catalytic subunit alpha 2
230087_at	0.547	0.0116685	-2.8284	-2.6898	-0.295208	PRIMA1	proline rich membrane anchor 1
226065_at	0.585	0.029454	-2.37922	-3.3981	-0.191543	PRICKLE1	prickle planar cell polarity protein 1
206007_at	0.557	0.0161061	2.67419	-2.9372	0.810622	PRG4	proteoglycan 4
224925_at	0.557	0.0151348	2.7041	-2.8895	0.415097	PREX1	phosphatidylinositol-3,4,5-trisphosphate dependent Rac exchange factor 1
212215_at	0.5	0.00384197	-3.34942	-1.8369	-0.287585	PREPL	prolyl endopeptidase-like
217851_s_at	0.567	0.0200757	2.56759	-3.1058	0.566228	PRELID3B	PRELI domain containing 3B
201619_at	0.557	0.0148932	2.71183	-2.8771	0.345963	PRDX3	peroxiredoxin 3
230311_s_at	0.617	0.0449128	-2.16653	-3.717	-0.188684	PRDM6	PR/SET domain 6
236061_at	0.558	0.0168473	-2.65251	-2.9716	-0.267937	PRDM15	PR/SET domain 15
219515_at	0.602	0.0368379	-2.26724	-3.5676	-0.244567	PRDM10	PR/SET domain 10
217273_at	0.59	0.0322243	2.33442	-3.4663	0.670673	PRAMEF10	PRAME family member 10
204086_at	0.6	0.0359954	2.2789	-3.5501	0.154393	PRAME	preferentially expressed antigen in melanoma
210670_at	0.619	0.0473239	-2.13969	-3.7562	-0.131574	PPY	pancreatic polypeptide
225213_at	0.5	0.00428757	3.29843	-1.9209	0.529992	PPTC7	PTC7 protein phosphatase homolog
203737_s_at	0.606	0.0377666	2.25467	-3.5864	0.68572	PPRC1	peroxisome proliferator-activated receptor gamma, coactivator-related 1
222467_s_at	0.389	0.00073324	4.11658	-0.5816	0.483417	PPP6R3	protein phosphatase 6 regulatory subunit 3
202791_s_at	0.578	0.0237997	-2.48446	-3.2358	-0.305802	PPP6R2	protein phosphatase 6 regulatory subunit 2
225429_at	0.566	0.0199058	2.57172	-3.0993	0.514287	PPP6C	protein phosphatase 6 catalytic subunit
222270_at	0.395	0.00078587	4.08438	-0.6334	0.41346	PPP4R3B	protein phosphatase 4 regulatory subunit 3B
225519_at	0.581	0.0268224	2.42559	-3.3269	0.421148	PPP4R2	protein phosphatase 4 regulatory subunit 2
32541_at	0.578	0.0235598	2.48943	-3.2281	0.164141	PPP3CC	protein phosphatase 3 catalytic subunit gamma
235772_at	0.5	0.0062325	-3.12401	-2.208	-0.261971	PPP3CB-AS1	PPP3CB antisense RNA 1 (head to head)
202429_s_at	0.205	1.179e-05	6.12089	2.3451	0.888074	PPP3CA	protein phosphatase 3 catalytic subunit alpha
231101_at	0.569	0.0205377	2.55651	-3.1232	0.80864	PPP2R5E	protein phosphatase 2 regulatory subunit B'epsilon
204611_s_at	0.578	0.0232019	-2.49693	-3.2164	-0.195467	PPP2R5B	protein phosphatase 2 regulatory subunit B'beta
218852_at	0.519	0.00881128	2.96141	-2.474	0.520284	PPP2R3C	protein phosphatase 2 regulatory subunit B''gamma
201375_s_at	0.5	0.00617086	3.12866	-2.2003	0.464577	PPP2CB	protein phosphatase 2 catalytic subunit beta
238719_at	0.581	0.026904	2.42409	-3.3292	0.426752	PPP2CA	protein phosphatase 2 catalytic subunit alpha
227412_at	0.614	0.0413013	-2.20931	-3.6539	-0.447891	PPP1R3E	protein phosphatase 1 regulatory subunit 3E
202165_at	0.469	0.00222928	3.60162	-1.4211	0.533251	PPP1R2	protein phosphatase 1 regulatory inhibitor subunit 2
1555462_at	0.557	0.0161385	2.67323	-2.9387	0.214321	PPP1R1C	protein phosphatase 1 regulatory inhibitor subunit 1C
224927_at	0.529	0.0100195	2.90069	-2.5728	0.93435	PPP1R18	protein phosphatase 1 regulatory subunit 18
225203_at	0.504	0.00645602	-3.10752	-2.235	-0.623774	PPP1R16A	protein phosphatase 1 regulatory subunit 16A
224692_at	0.58	0.0258939	2.44298	-3.3001	0.516119	PPP1R15B	protein phosphatase 1 regulatory subunit 15B
226907_at	0.558	0.0177884	-2.62625	-3.0133	-0.175536	PPP1R14C	protein phosphatase 1 regulatory inhibitor subunit 14C
212680_x_at	0.556	0.0136661	-2.75303	-2.8111	-0.300788	PPP1R14B	protein phosphatase 1 regulatory inhibitor subunit 14B
227006_at	0.578	0.0238167	-2.48411	-3.2364	-0.225577	PPP1R14A	protein phosphatase 1 regulatory inhibitor subunit 14A
201408_at	0.551	0.011983	2.81575	-2.7102	0.381488	PPP1CB	protein phosphatase 1 catalytic subunit beta
228108_at	0.618	0.046367	2.15019	-3.7409	0.441025	PPM1L	protein phosphatase, Mg2+/Mn2+ dependent 1L
235061_at	0.563	0.0191073	-2.5916	-3.068	-0.493404	PPM1K	protein phosphatase, Mg2+/Mn2+ dependent 1K
213225_at	0.565	0.0193487	2.58551	-3.0776	0.528011	PPM1B	protein phosphatase, Mg2+/Mn2+ dependent 1B
235344_at	0.515	0.00832045	2.98842	-2.43	0.479896	PPM1A	protein phosphatase, Mg2+/Mn2+ dependent 1A
203407_at	0.599	0.0353261	2.28835	-3.5359	0.47373	PPL	periplakin
226472_at	0.524	0.00973709	2.91422	-2.5508	0.424199	PPIL4	peptidylprolyl isomerase like 4
201490_s_at	0.615	0.0441408	2.1754	-3.704	0.580182	PPIF	peptidylprolyl isomerase F
203736_s_at	0.551	0.012503	2.79551	-2.7429	0.351307	PPFIBP1	PPFIA binding protein 1
210235_s_at	0.609	0.0397031	2.22936	-3.6242	0.333737	PPFIA1	PTPRF interacting protein alpha 1
235833_at	0.581	0.0266161	-2.4294	-3.3211	-0.2257	PPAT	phosphoribosyl pyrophosphate amidotransferase
208510_s_at	0.557	0.0157886	2.68378	-2.9219	0.579424	PPARG	peroxisome proliferator activated receptor gamma
37152_at	0.567	0.0202671	2.56297	-3.1131	0.688613	PPARD	peroxisome proliferator activated receptor delta
244689_at	0.475	0.00293154	-3.47485	-1.63	-0.511334	PPARA	peroxisome proliferator activated receptor alpha
208554_at	0.572	0.0212447	-2.54002	-3.1491	-0.161533	POU4F3	POU class 4 homeobox 3
235661_at	0.552	0.0125574	-2.79344	-2.7462	-0.18433	POU2F2	POU class 2 homeobox 2
205267_at	0.609	0.0395745	2.231	-3.6217	0.359339	POU2AF1	POU class 2 associating factor 1
1553246_a_at	0.575	0.0218263	-2.52683	-3.1697	-0.194646	POMK	protein-O-mannose kinase
1557633_at	0.6	0.036253	-2.27531	-3.5555	-0.133687	POM121L8P	POM121 transmembrane nucleoporin like 8, pseudogene
212178_s_at	0.608	0.0386642	2.24279	-3.6042	0.251113	POM121C	POM121 transmembrane nucleoporin C
1555837_s_at	0.614	0.0430534	2.18814	-3.6852	0.353161	POLR2B	RNA polymerase II subunit B
224874_at	0.535	0.0106529	2.87165	-2.6199	0.223016	POLR1D	RNA polymerase I subunit D
219510_at	0.614	0.0433957	-2.1841	-3.6912	-0.20337	POLQ	DNA polymerase theta
233852_at	0.613	0.0409146	-2.21409	-3.6468	-0.147215	POLH	DNA polymerase eta
225844_at	0.58	0.0254874	-2.45077	-3.288	-0.276165	POLE4	DNA polymerase epsilon 4, accessory subunit
204441_s_at	0.557	0.015804	-2.68331	-2.9226	-0.264047	POLA2	DNA polymerase alpha 2, accessory subunit
1555383_a_at	0.615	0.0439881	-2.17717	-3.7013	-0.139258	POF1B	premature ovarian failure, 1B
226283_at	0.619	0.0467189	2.1463	-3.7466	0.267151	POC1B	POC1 centriolar protein B
209034_at	0.416	0.00113463	3.91408	-0.9094	0.772938	PNRC1	proline rich nuclear receptor coactivator 1
223309_x_at	0.5	0.00598455	3.143	-2.1768	0.814811	PNPLA8	patatin like phospholipase domain containing 8
209740_s_at	0.582	0.0285676	2.39439	-3.3749	0.500199	PNPLA4	patatin like phospholipase domain containing 4
213677_s_at	0.476	0.00306484	-3.45425	-1.664	-0.552529	PMS1	PMS1 homolog 1, mismatch repair system component
203467_at	0.557	0.014741	-2.71676	-2.8692	-0.522309	PMM1	phosphomannomutase 1
209640_at	0.582	0.028346	-2.39825	-3.369	-0.153964	PML	promyelocytic leukemia
38671_at	0.507	0.00741619	-3.04252	-2.3415	-0.248293	PLXND1	plexin D1
213241_at	0.624	0.0497031	2.11441	-3.793	0.78803	PLXNC1	plexin C1
226865_at	0.579	0.0248664	2.46292	-3.2692	0.367706	PLXDC2	plexin domain containing 2
202446_s_at	0.551	0.0121186	2.81039	-2.7189	0.910676	PLSCR1	phospholipid scramblase 1
205190_at	0.606	0.0379795	2.25183	-3.5907	0.362054	PLS1	plastin 1
218509_at	0.6	0.0362917	-2.27477	-3.5563	-0.232198	PLPPR2	phospholipid phosphatase related 2
219732_at	0.5	0.00625165	-3.12258	-2.2103	-0.65214	PLPPR1	phospholipid phosphatase related 1
212230_at	0.372	0.0003968	4.40298	-0.1253	0.952924	PLPP3	phospholipid phosphatase 3
202185_at	0.533	0.0104431	-2.88108	-2.6046	-0.344033	PLOD3	procollagen-lysine,2-oxoglutarate 5-dioxygenase 3
202619_s_at	0.59	0.0318904	2.33963	-3.4584	0.692952	PLOD2	procollagen-lysine,2-oxoglutarate 5-dioxygenase 2
204939_s_at	0.551	0.0123908	-2.79981	-2.7359	-0.242707	PLN	phospholamban
204519_s_at	0.599	0.035493	-2.28598	-3.5395	-0.400936	PLLP	plasmolipin
229825_at	0.578	0.0239106	2.48218	-3.2394	0.157628	PLK3	polo like kinase 3
201939_at	0.614	0.0412986	2.20934	-3.6539	0.874709	PLK2	polo like kinase 2
1568666_at	0.587	0.0304569	2.36256	-3.4235	0.262783	PLIN5	perilipin 5
209122_at	0.557	0.0164793	2.66316	-2.9547	0.524988	PLIN2	perilipin 2
205913_at	0.332	0.00028937	4.55126	0.1068	1.40999	PLIN1	perilipin 1
214415_at	0.601	0.0367074	2.26903	-3.565	0.427709	PLGLB1///PLGLB2	plasminogen-like B1///plasminogen-like B2
235360_at	0.378	0.00047328	-4.32053	-0.2557	-0.370925	PLEKHM3	pleckstrin homology domain containing M3
225727_at	0.576	0.0220679	-2.52146	-3.1781	-0.140335	PLEKHH1	pleckstrin homology, MyTH4 and FERM domain containing H1
222699_s_at	0.546	0.0116001	2.8312	-2.6853	0.627861	PLEKHF2	pleckstrin homology and FYVE domain containing 2
201410_at	0.576	0.0223324	2.51563	-3.1872	0.553596	PLEKHB2	pleckstrin homology domain containing B2
220157_x_at	0.332	0.00021388	-4.69404	0.3275	-0.326538	PLEKHA8P1	pleckstrin homology domain containing A8 pseudogene 1
228450_at	0.397	0.00083165	4.05809	-0.6758	1.02254	PLEKHA7	pleckstrin homology domain containing A7
223370_at	0.622	0.0487726	2.12416	-3.7788	0.310587	PLEKHA3	pleckstrin homology domain containing A3
203471_s_at	0.546	0.0115933	2.83148	-2.6848	0.965392	PLEK	pleckstrin
239270_at	0.581	0.026895	-2.42425	-3.329	-0.280548	PLCXD3	phosphatidylinositol specific phospholipase C X domain containing 3
216217_at	0.479	0.00315949	-3.44015	-1.6872	-0.227393	PLCL2	phospholipase C like 2
216633_s_at	0.562	0.0187535	-2.60067	-3.0537	-0.169093	PLCH1	phospholipase C eta 1
204046_at	0.565	0.0196614	-2.57772	-3.0899	-0.175674	PLCB2	phospholipase C beta 2
211925_s_at	0.591	0.0334119	-2.31631	-3.4938	-0.142249	PLCB1	phospholipase C beta 1
211924_s_at	0.582	0.0272424	2.41791	-3.3388	0.768597	PLAUR	plasminogen activator, urokinase receptor
211668_s_at	0.588	0.0309551	2.35448	-3.4359	0.197123	PLAU	plasminogen activator, urokinase
235394_at	0.618	0.0465663	2.14798	-3.7441	0.486162	PLAA	phospholipase A2 activating protein
210194_at	0.617	0.0446371	2.16968	-3.7124	0.155501	PLA2R1	phospholipase A2 receptor 1
207717_s_at	0.475	0.0029463	3.47253	-1.6338	0.587738	PKP2	plakophilin 2
221883_at	0.557	0.0151842	-2.70254	-2.892	-0.206317	PKNOX1	PBX/knotted 1 homeobox 1
226299_at	0.618	0.0463502	-2.15037	-3.7406	-0.218108	PKN3	protein kinase N3
210451_at	0.416	0.00119537	3.88993	-0.9487	0.797613	PKLR	pyruvate kinase, liver and RBC
1569218_at	0.519	0.00883963	-2.95989	-2.4765	-0.138704	PKIA-AS1	PKIA antisense RNA 1
230673_at	0.416	0.00114972	-3.90796	-0.9193	-0.320131	PKHD1L1	polycystic kidney and hepatic disease 1 (autosomal recessive)-like 1
203688_at	0.618	0.0457701	-2.15684	-3.7312	-0.468075	PKD2	polycystin 2, transient receptor potential cation channel
1557610_at	0.582	0.0282816	-2.39937	-3.3672	-0.162991	PITRM1-AS1	PITRM1 antisense RNA 1
1568949_at	0.5	0.005859	3.15291	-2.1605	0.329921	PITPNC1	phosphatidylinositol transfer protein, cytoplasmic 1
202522_at	0.58	0.0256162	2.44829	-3.2919	0.212355	PITPNB	phosphatidylinositol transfer protein beta
228972_at	0.551	0.012317	-2.80266	-2.7313	-0.362221	PITPNA-AS1	PITPNA antisense RNA 1
211205_x_at	0.514	0.00800099	3.00685	-2.3999	0.293254	PIP5K1A	phosphatidylinositol-4-phosphate 5-kinase type 1 alpha
212829_at	0.579	0.0245587	2.46904	-3.2598	0.474658	PIP4K2A	phosphatidylinositol-5-phosphate 4-kinase type 2 alpha
204572_s_at	0.507	0.00675635	-3.08623	-2.2699	-0.317756	PIN4	peptidylprolyl cis/trans isomerase, NIMA-interacting 4
209193_at	0.581	0.0265366	2.43088	-3.3188	0.8331	PIM1	Pim-1 proto-oncogene, serine/threonine kinase
222218_s_at	0.607	0.0385438	2.24437	-3.6018	0.547602	PILRA	paired immunoglobin like type 2 receptor alpha
227645_at	0.588	0.0310998	2.35215	-3.4394	0.482666	PIK3R5	phosphoinositide-3-kinase regulatory subunit 5
1568629_s_at	0.614	0.0412273	-2.21022	-3.6526	-0.348021	PIK3R2	phosphoinositide-3-kinase regulatory subunit 2
204369_at	0.541	0.0112763	2.84466	-2.6635	0.386776	PIK3CA	phosphatidylinositol-4,5-bisphosphate 3-kinase catalytic subunit alpha
215394_at	0.578	0.0235423	-2.48979	-3.2275	-0.171924	PIK3C3	phosphatidylinositol 3-kinase catalytic subunit type 3
215129_at	0.599	0.0355412	-2.28529	-3.5405	-0.23717	PIK3C2G	phosphatidylinositol-4-phosphate 3-kinase catalytic subunit type 2 gamma
204484_at	0.582	0.0281443	-2.40179	-3.3635	-0.333786	PIK3C2B	phosphatidylinositol-4-phosphate 3-kinase catalytic subunit type 2 beta
234426_x_at	0.599	0.03549	2.28602	-3.5395	0.11149	PIH2	pregnancy-induced hypertension syndrome-related protein
220041_at	0.565	0.019722	2.57623	-3.0922	0.193799	PIGZ	phosphatidylinositol glycan anchor biosynthesis class Z
51146_at	0.578	0.023851	-2.4834	-3.2375	-0.358716	PIGV	phosphatidylinositol glycan anchor biosynthesis class V
214990_at	0.604	0.0372095	-2.26218	-3.5752	-0.230027	PIGO	phosphatidylinositol glycan anchor biosynthesis class O
218652_s_at	0.59	0.0317973	-2.34108	-3.4562	-0.253365	PIGG	phosphatidylinositol glycan anchor biosynthesis class G
205077_s_at	0.614	0.043715	-2.18035	-3.6967	-0.22325	PIGF	phosphatidylinositol glycan anchor biosynthesis class F
205452_at	0.58	0.0257699	2.44534	-3.2964	0.254476	PIGB	phosphatidylinositol glycan anchor biosynthesis class B
1563584_at	0.579	0.0250747	-2.45881	-3.2756	-0.12461	PIEZO2	piezo type mechanosensitive ion channel component 2
215236_s_at	0.557	0.0147237	2.71732	-2.8683	0.960767	PICALM	phosphatidylinositol binding clathrin assembly protein
213239_at	0.591	0.0323334	-2.33273	-3.4689	-0.390973	PIBF1	progesterone immunomodulatory binding factor 1
203035_s_at	0.579	0.025042	-2.45946	-3.2746	-0.210181	PIAS3	protein inhibitor of activated STAT 3
210417_s_at	0.6	0.0363857	2.27347	-3.5583	0.28369	PI4KB	phosphatidylinositol 4-kinase beta
207938_at	0.617	0.0452369	2.16284	-3.7224	0.135287	PI15	peptidase inhibitor 15
203335_at	0.398	0.00085218	4.04677	-0.6941	0.482328	PHYH	phytanoyl-CoA 2-hydroxylase
230434_at	0.5	0.00536921	-3.19367	-2.0935	-0.458043	PHOSPHO2	phosphatase, orphan 2
213407_at	0.582	0.0276917	2.40981	-3.3512	0.382226	PHLPP2	PH domain and leucine rich repeat protein phosphatase 2
217997_at	0.514	0.00792062	3.01159	-2.3921	1.4456	PHLDA1	pleckstrin homology like domain family A member 1
229876_at	0.565	0.0196676	2.57757	-3.0901	0.288009	PHKA1	phosphorylase kinase regulatory subunit alpha 1
212916_at	0.52	0.00913367	-2.94445	-2.5016	-0.422396	PHF8	PHD finger protein 8
225309_at	0.557	0.0153765	2.69649	-2.9016	0.364128	PHF5A	PHD finger protein 5A
37566_at	0.618	0.0457014	-2.15761	-3.73	-0.130348	PHF24	PHD finger protein 24
212726_at	0.618	0.0457467	2.1571	-3.7308	0.224544	PHF2	PHD finger protein 2
200919_at	0.5	0.00568458	3.16702	-2.1373	0.551274	PHC2	polyhomeotic homolog 2
226823_at	0.58	0.0254066	2.45234	-3.2856	0.238479	PHACTR4	phosphatase and actin regulator 4
244774_at	0.489	0.00338151	-3.40867	-1.7392	-0.995812	PHACTR2	phosphatase and actin regulator 2
219394_at	0.567	0.0200631	2.56789	-3.1054	0.366228	PGS1	phosphatidylglycerophosphate synthase 1
213227_at	0.599	0.0352866	2.28891	-3.5351	0.254824	PGRMC2	progesterone receptor membrane component 2
201120_s_at	0.59	0.0320164	2.33765	-3.4614	0.587353	PGRMC1	progesterone receptor membrane component 1
225366_at	0.614	0.0431382	2.18714	-3.6867	0.809276	PGM2	phosphoglucomutase 2
218388_at	0.606	0.0377511	-2.25488	-3.5861	-0.460948	PGLS	6-phosphogluconolactonase
240202_x_at	0.579	0.0246822	-2.46657	-3.2636	-0.156162	PFKP	phosphofructokinase, platelet
202464_s_at	0.574	0.0217043	2.52957	-3.1655	0.987098	PFKFB3	6-phosphofructo-2-kinase/fructose-2,6-biphosphatase 3
205360_at	0.565	0.0193873	-2.58454	-3.0792	-0.258237	PFDN4	prefoldin subunit 4
213302_at	0.617	0.0452938	-2.1622	-3.7233	-0.255035	PFAS	phosphoribosylformylglycinamidine synthase
203972_s_at	0.603	0.0370812	2.26392	-3.5726	0.321046	PEX3	peroxisomal biogenesis factor 3
205246_at	0.56	0.0184414	2.6088	-3.0409	0.567304	PEX13	peroxisomal biogenesis factor 13
233396_s_at	0.558	0.0172409	-2.64136	-2.9893	-0.277478	PET117///KAT14	PET117 homolog///lysine acetyltransferase 14
221045_s_at	0.614	0.0434142	-2.18388	-3.6915	-0.617191	PER3	period circadian clock 3
202108_at	0.591	0.0323754	2.33208	-3.4699	0.362608	PEPD	peptidase D
218472_s_at	0.578	0.0237578	2.48532	-3.2345	0.455734	PELO	pelota homolog (Drosophila)
218319_at	0.563	0.0190048	2.59421	-3.0639	1.28659	PELI1	pellino E3 ubiquitin protein ligase 1
212094_at	0.5	0.00488481	3.23774	-2.0209	1.21842	PEG10	paternally expressed 10
208983_s_at	0.591	0.0337905	2.31066	-3.5023	0.682054	PECAM1	platelet and endothelial cell adhesion molecule 1
212915_at	0.565	0.0197475	-2.5756	-3.0932	-0.20594	PDZRN3	PDZ domain containing ring finger 3
213549_at	0.606	0.0379377	2.25239	-3.5899	0.560642	PDZD8	PDZ domain containing 8
1555347_at	0.578	0.0229327	-2.50265	-3.2075	-0.119681	PDXDC1	pyridoxal dependent decarboxylase domain containing 1
220865_s_at	0.617	0.0452228	2.163	-3.7221	0.489191	PDSS1	prenyl (decaprenyl) diphosphate synthase, subunit 1
221898_at	0.557	0.0165761	-2.66033	-2.9592	-0.209608	PDPN	podoplanin
221994_at	0.609	0.0390896	2.23725	-3.6124	0.19904	PDLIM5	PDZ and LIM domain 5
210170_at	0.586	0.0301993	-2.36679	-3.4171	-0.280958	PDLIM3	PDZ and LIM domain 3
203067_at	0.54	0.0111909	2.84827	-2.6577	0.263602	PDHX	pyruvate dehydrogenase complex component X
200979_at	0.564	0.0192138	2.58891	-3.0723	0.36739	PDHA1	pyruvate dehydrogenase (lipoamide) alpha 1
205226_at	0.522	0.00945098	-2.92832	-2.5279	-0.220097	PDGFRL	platelet derived growth factor receptor like
219304_s_at	0.576	0.0223544	-2.51515	-3.188	-0.397325	PDGFD	platelet derived growth factor D
240088_at	0.604	0.0372172	2.26207	-3.5754	0.162256	PDE5A	phosphodiesterase 5A
211302_s_at	0.607	0.0385219	2.24466	-3.6014	0.734101	PDE4B	phosphodiesterase 4B
208591_s_at	0.496	0.0034978	3.39298	-1.765	0.676056	PDE3B	phosphodiesterase 3B
1554915_a_at	0.623	0.0492554	2.11908	-3.7862	0.446188	PDE12	phosphodiesterase 12
237248_at	0.465	0.00216075	3.61606	-1.3974	1.17041	PDE11A	phosphodiesterase 11A
227968_at	0.587	0.0304789	-2.3622	-3.4241	-0.2859	PDDC1	Parkinson disease 7 domain containing 1
212424_at	0.576	0.0223233	-2.51583	-3.1869	-0.216769	PDCD11	programmed cell death 11
225274_at	0.59	0.0317	2.34262	-3.4539	0.402938	PCYOX1	prenylcysteine oxidase 1
211262_at	0.607	0.0385336	2.24451	-3.6016	0.213935	PCSK6	proprotein convertase subtilisin/kexin type 6
219295_s_at	0.584	0.0294026	2.38008	-3.3968	0.645886	PCOLCE2	procollagen C-endopeptidase enhancer 2
1568971_at	0.58	0.025274	-2.45491	-3.2816	-0.12961	PCNX4	pecanex homolog 4 (Drosophila)
229287_at	0.5	0.00423612	3.30405	-1.9117	0.466655	PCNX1	pecanex homolog 1 (Drosophila)
208857_s_at	0.5	0.00556606	3.17686	-2.1211	0.344715	PCMT1	protein-L-isoaspartate (D-aspartate) O-methyltransferase
224326_s_at	0.578	0.0234661	2.49138	-3.225	0.232115	PCGF6	polycomb group ring finger 6
231754_at	0.418	0.00139785	-3.81751	-1.0669	-0.26307	PCDHGC4	protocadherin gamma subfamily C, 4
211066_x_at	0.572	0.0212789	-2.53923	-3.1503	-0.379232	PCDHGA1///PCDHGA2///PCDHGA3///PCDHGA4///PCDHGA5///PCDHGA6///PCDHGA7///PCDHGA9///PCDHGA10///PCDHGA11///PCDHGB1///PCDHGB2///PCDHGB3///PCDHGB5///PCDHGB6///PCDHGB7///PCDHGC4///PCDHGC5///PCDHGA12///PCDHGA8///PCDHGB4///PCDHGC3	protocadherin gamma subfamily A, 1///protocadherin gamma subfamily A, 2///protocadherin gamma subfamily A, 3///protocadherin gamma subfamily A, 4///protocadherin gamma subfamily A, 5///protocadherin gamma subfamily A, 6///protocadherin gamma subfamily A, 7///protocadherin gamma subfamily A, 9///protocadherin gamma subfamily A, 10///protocadherin gamma subfamily A, 11///protocadherin gamma subfami…
221410_x_at	0.582	0.0289877	-2.38714	-3.386	-0.14988	PCDHB3	protocadherin beta 3
225975_at	0.476	0.00307843	-3.4522	-1.6674	-0.502751	PCDH18	protocadherin 18
203918_at	0.557	0.0158853	-2.68084	-2.9266	-0.2666	PCDH1	protocadherin 1
213264_at	0.623	0.049616	2.11532	-3.7917	0.256801	PCBP2	poly(rC) binding protein 2
204082_at	0.557	0.0150026	-2.70832	-2.8827	-0.343324	PBX3	PBX homeobox 3
218515_at	0.591	0.0326353	2.32808	-3.4759	0.389853	PAXBP1	PAX3 and PAX7 binding protein 1
209494_s_at	0.606	0.0376118	-2.25675	-3.5833	-0.349652	PATZ1	POZ/BTB and AT hook containing zinc finger 1
235235_s_at	0.582	0.0270943	2.4206	-3.3346	0.399061	PATL1	PAT1 homolog 1, processing body mRNA decay factor
204629_at	0.579	0.0250443	-2.45941	-3.2747	-0.254499	PARVB	parvin beta
215972_at	0.557	0.0148854	-2.71208	-2.8767	-0.234827	PART1	prostate androgen-regulated transcript 1 (non-protein coding)
225809_at	0.617	0.0447811	-2.16803	-3.7148	-0.194851	PARM1	prostate androgen-regulated mucin-like protein 1
242871_at	0.556	0.0133817	2.76309	-2.795	0.223046	PAQR5	progestin and adipoQ receptor family member 5
212858_at	0.578	0.0237955	-2.48454	-3.2357	-0.178139	PAQR4	progestin and adipoQ receptor family member 4
1557576_at	0.591	0.0333249	2.31762	-3.4918	0.174601	PAQR3	progestin and adipoQ receptor family member 3
214689_at	0.522	0.00940126	-2.93081	-2.5238	-0.183704	PAPPA2	pappalysin 2
201981_at	0.403	0.00098565	-3.97929	-0.8034	-0.232217	PAPPA	pappalysin 1
233896_s_at	0.5	0.0047906	-3.24681	-2.006	-0.374626	PAPLN	papilin, proteoglycan like sulfated glycoprotein
229043_at	0.576	0.0222945	-2.51646	-3.186	-0.491317	PAPD5	poly(A) RNA polymerase D5, non-canonical
204715_at	0.614	0.04126	2.20982	-3.6532	0.552355	PANX1	pannexin 1
218433_at	0.582	0.0283074	2.39892	-3.3679	0.311501	PANK3	pantothenate kinase 3
235130_at	0.614	0.0434459	2.18351	-3.692	0.245637	PANK2	pantothenate kinase 2
203117_s_at	0.601	0.0366319	-2.27007	-3.5634	-0.362899	PAN2	PAN2 poly(A) specific ribonuclease subunit
218736_s_at	0.552	0.0126158	-2.79123	-2.7498	-0.84188	PALMD	palmdelphin
1554640_at	0.614	0.0431704	2.18676	-3.6872	0.551266	PALM2	paralemmin 2
219461_at	0.567	0.0200498	-2.56821	-3.1049	-0.169612	PAK6	p21 (RAC1) activated kinase 6
203154_s_at	0.617	0.0450504	-2.16496	-3.7193	-0.176353	PAK4	p21 (RAC1) activated kinase 4
208878_s_at	0.513	0.00784177	3.0163	-2.3844	0.441605	PAK2	p21 (RAC1) activated kinase 2
209615_s_at	0.576	0.0221146	2.52042	-3.1798	0.304163	PAK1	p21 (RAC1) activated kinase 1
221868_at	0.332	0.00014864	-4.86708	0.5907	-0.697785	PAIP2B	poly(A) binding protein interacting protein 2B
208051_s_at	0.551	0.0121838	2.80784	-2.723	0.559729	PAIP1	poly(A) binding protein interacting protein 1
211547_s_at	0.586	0.0299744	2.37051	-3.4114	0.507162	PAFAH1B1	platelet activating factor acetylhydrolase 1b regulatory subunit 1
211413_s_at	0.578	0.0239733	2.48089	-3.2414	0.198402	PADI4	peptidyl arginine deiminase 4
218744_s_at	0.582	0.0287866	-2.3906	-3.3807	-0.42175	PACSIN3	protein kinase C and casein kinase substrate in neurons 3
214204_at	0.617	0.0453146	2.16196	-3.7237	0.192622	PACRG	PARK2 coregulated
218957_s_at	0.591	0.0338607	-2.30962	-3.5039	-0.309528	PAAF1	proteasomal ATPase associated factor 1
228703_at	0.614	0.0426423	-2.19304	-3.678	-0.167397	P4HA3	prolyl 4-hydroxylase subunit alpha 3
204078_at	0.576	0.0220601	-2.52163	-3.1779	-0.230037	P3H4	prolyl 3-hydroxylase family member 4 (non-enzymatic)
206637_at	0.591	0.0327828	2.32583	-3.4794	0.227517	P2RY14	purinergic receptor P2Y14
202696_at	0.593	0.034289	2.30332	-3.5134	0.199581	OXSR1	oxidative stress responsive 1
1553222_at	0.579	0.0243825	-2.47258	-3.2543	-0.235848	OXER1	oxoeicosanoid receptor 1
233301_at	0.614	0.0422831	-2.19735	-3.6716	-0.165983	OXCT2	3-oxoacid CoA-transferase 2
230617_at	0.572	0.020871	-2.54867	-3.1355	-0.160241	OVOL1-AS1	OVOL1 antisense RNA 1
205432_at	0.59	0.0320665	2.33687	-3.4626	0.289742	OVGP1	oviductal glycoprotein 1
229488_at	0.623	0.0496263	-2.11521	-3.7918	-0.177576	OTUD7B	OTU deubiquitinase 7B
227765_at	0.504	0.00643428	-3.1091	-2.2324	-0.372755	OTUD6B-AS1	OTUD6B antisense RNA 1 (head to head)
222878_s_at	0.578	0.0237693	-2.48509	-3.2348	-0.191304	OTUB2	OTU deubiquitinase, ubiquitin aldehyde binding 2
1554414_a_at	0.389	0.00065032	4.17238	-0.4919	1.09463	OSGIN2	oxidative stress induced growth inhibitor family member 2
230032_at	0.614	0.0428351	-2.19074	-3.6814	-0.401491	OSGEPL1	O-sialoglycoprotein endopeptidase-like 1
218047_at	0.416	0.00122073	3.88021	-0.9645	0.371939	OSBPL9	oxysterol binding protein like 9
212585_at	0.586	0.0297581	2.37411	-3.4059	0.358476	OSBPL8	oxysterol binding protein like 8
209222_s_at	0.522	0.00928263	2.93681	-2.5141	0.300845	OSBPL2	oxysterol binding protein like 2
210028_s_at	0.572	0.0212727	-2.53938	-3.1501	-0.339891	ORC3	origin recognition complex subunit 3
221864_at	0.52	0.00902823	-2.94993	-2.4927	-0.645684	ORAI3	ORAI calcium release-activated calcium modulator 3
1555661_at	0.469	0.0024446	-3.55895	-1.4914	-0.237975	OR8D1	olfactory receptor family 8 subfamily D member 1
217551_at	0.533	0.0104471	2.8809	-2.6049	0.523694	OR7E14P	olfactory receptor family 7 subfamily E member 14 pseudogene
1566956_at	0.618	0.0463801	-2.15004	-3.7411	-0.268303	OR7E104P	olfactory receptor family 7 subfamily E member 104 pseudogene
1552991_at	0.556	0.0141882	-2.73508	-2.8399	-0.191721	OR5P2	olfactory receptor family 5 subfamily P member 2
229768_at	0.594	0.0346736	-2.29772	-3.5218	-0.184517	OR51E1	olfactory receptor family 51 subfamily E member 1
234770_at	0.591	0.0330344	-2.322	-3.4852	-0.205435	OR51A1P	olfactory receptor family 51 subfamily A member 1 pseudogene
208508_s_at	0.567	0.0202971	-2.56225	-3.1142	-0.160478	OR2J2	olfactory receptor family 2 subfamily J member 2
1567055_at	0.618	0.0459091	-2.15528	-3.7335	-0.159876	OR1C1	olfactory receptor family 1 subfamily C member 1
202073_at	0.533	0.0104521	2.88068	-2.6052	0.590268	OPTN	optineurin
219032_x_at	0.551	0.01247	-2.79677	-2.7408	-0.330755	OPN3	opsin 3
221327_s_at	0.56	0.0183755	-2.61054	-3.0381	-0.181357	OPN1MW3///OPN1MW2///OPN1LW///OPN1MW	opsin 1 (cone pigments), medium-wave-sensitive 3///opsin 1 (cone pigments), medium-wave-sensitive 2///opsin 1 (cone pigments), long-wave-sensitive///opsin 1 (cone pigments), medium-wave-sensitive
214306_at	0.504	0.0064283	3.10954	-2.2317	0.423989	OPA1	OPA1, mitochondrial dynamin like GTPase
230271_at	0.497	0.00373804	-3.36216	-1.8159	-0.624132	ONECUT2	one cut homeobox 2
218162_at	0.614	0.0426655	-2.19276	-3.6784	-0.358729	OLFML3	olfactomedin like 3
205591_at	0.614	0.04188	-2.20223	-3.6644	-0.317014	OLFM1	olfactomedin 1
225332_at	0.557	0.016394	-2.66566	-2.9507	-0.632385	OIP5-AS1	OIP5 antisense RNA 1
219246_s_at	0.558	0.0179122	-2.6229	-3.0186	-0.247845	OGFOD2	2-oxoglutarate and iron dependent oxygenase domain containing 2
225110_at	0.607	0.0385849	2.24383	-3.6026	0.37418	OGFOD1	2-oxoglutarate and iron dependent oxygenase domain containing 1
243934_at	0.5	0.00619517	-3.12682	-2.2033	-0.20487	ODF3B	outer dense fiber of sperm tails 3B
200790_at	0.563	0.0189272	2.5962	-3.0608	0.947122	ODC1	ornithine decarboxylase 1
201365_at	0.59	0.0317584	-2.3417	-3.4553	-0.343779	OAZ2	ornithine decarboxylase antizyme 2
220645_at	0.5	0.00592282	-3.14784	-2.1688	-0.266953	NXPE4	neurexophilin and PC-esterase domain family member 4
223984_s_at	0.614	0.0416827	2.20463	-3.6608	0.177003	NUP58	nucleoporin 58
219007_at	0.58	0.025505	-2.45043	-3.2886	-0.347472	NUP43	nucleoporin 43
238637_at	0.614	0.0417085	-2.20432	-3.6613	-0.16402	NUP37	nucleoporin 37
220035_at	0.588	0.0314421	-2.34669	-3.4477	-0.468819	NUP210	nucleoporin 210
200747_s_at	0.62	0.0476871	-2.13576	-3.762	-0.234436	NUMA1	nuclear mitotic apparatus protein 1
224956_at	0.5	0.00550072	3.18237	-2.1121	0.874977	NUFIP2	NUFIP2, FMR1 interacting protein 2
1552564_at	0.589	0.0315341	-2.34523	-3.4499	-0.139183	NUDT9P1	nudix hydrolase 9 pseudogene 1
224830_at	0.617	0.0450843	2.16457	-3.7198	0.337113	NUDT21	nudix hydrolase 21
1568593_a_at	0.332	0.00027193	-4.58056	0.1524	-0.717467	NUDT16P1	nudix hydrolase 16 pseudogene 1
214136_at	0.469	0.00239286	-3.56885	-1.4751	-1.22042	NUDT13	nudix hydrolase 13
201173_x_at	0.572	0.0214312	-2.53575	-3.1558	-0.33657	NUDC	nuclear distribution C, dynein complex regulator
204589_at	0.622	0.0488782	2.12305	-3.7804	0.359842	NUAK1	NUAK family kinase 1
223369_at	0.618	0.0463396	2.15049	-3.7405	0.22785	NTMT1	N-terminal Xaa-Pro-Lys N-methyltransferase 1
203939_at	0.415	0.00107108	-3.94078	-0.8659	-0.742482	NT5E	5'-nucleotidase ecto
242239_at	0.618	0.0463807	-2.15004	-3.7411	-0.493626	NSUN6	NOP2/Sun RNA methyltransferase family member 6
213460_x_at	0.507	0.00725863	-3.0526	-2.325	-0.417308	NSUN5P2///NSUN5P1	NOP2/Sun RNA methyltransferase family member 5 pseudogene 2///NOP2/Sun RNA methyltransferase family member 5 pseudogene 1
223076_s_at	0.598	0.035187	2.29033	-3.533	0.243504	NSUN2	NOP2/Sun RNA methyltransferase family member 2
219067_s_at	0.551	0.0123693	-2.80063	-2.7346	-0.312819	NSMCE4A	NSE4 homolog A, SMC5-SMC6 complex component
224666_at	0.557	0.0153776	-2.69646	-2.9017	-0.28549	NSMCE1	NSE1 homolog, SMC5-SMC6 complex component
205795_at	0.563	0.0190403	-2.59331	-3.0653	-0.146556	NRXN3	neurexin 3
209915_s_at	0.558	0.0168526	-2.65236	-2.9719	-0.121428	NRXN1	neurexin 1
210842_at	0.578	0.0240034	-2.48027	-3.2423	-0.134258	NRP2	neuropilin 2
212298_at	0.581	0.0263059	2.43519	-3.3121	0.866553	NRP1	neuropilin 1
227971_at	0.591	0.032407	-2.3316	-3.4706	-0.156258	NRK	Nik related kinase
202600_s_at	0.595	0.0348661	2.29494	-3.526	0.885993	NRIP1	nuclear receptor interacting protein 1
206343_s_at	0.551	0.0125103	2.79523	-2.7433	1.60022	NRG1	neuregulin 1
204105_s_at	0.519	0.00887357	2.95809	-2.4794	0.244243	NRCAM	neuronal cell adhesion molecule
221803_s_at	0.576	0.0223829	2.51453	-3.189	0.866842	NRBF2	nuclear receptor binding factor 2
208343_s_at	0.557	0.0153539	2.6972	-2.9005	0.921594	NR5A2	nuclear receptor subfamily 5 group A member 2
216979_at	0.557	0.0159271	-2.67957	-2.9286	-0.176748	NR4A3	nuclear receptor subfamily 4 group A member 3
216248_s_at	0.551	0.0124633	-2.79703	-2.7404	-1.36511	NR4A2	nuclear receptor subfamily 4 group A member 2
202340_x_at	0.591	0.0326882	-2.32727	-3.4772	-0.49866	NR4A1	nuclear receptor subfamily 4 group A member 1
209121_x_at	0.587	0.0305171	-2.36158	-3.425	-0.440289	NR2F2	nuclear receptor subfamily 2 group F member 2
206038_s_at	0.613	0.0407214	-2.2165	-3.6433	-0.156789	NR2C2	nuclear receptor subfamily 2 group C member 2
207007_at	0.55	0.0119227	-2.81815	-2.7064	-0.321112	NR1I3	nuclear receptor subfamily 1 group I member 3
201468_s_at	0.575	0.0219764	-2.52349	-3.175	-0.351241	NQO1	NAD(P)H quinone dehydrogenase 1
214066_x_at	0.621	0.0481359	-2.13093	-3.769	-0.204809	NPR2	natriuretic peptide receptor 2
218086_at	0.578	0.0231771	-2.49746	-3.2156	-0.288178	NPDC1	neural proliferation, differentiation and control 1
231566_at	0.582	0.0285294	-2.39505	-3.3739	-0.14628	NOXRED1	NADP dependent oxidoreductase domain containing 1
207217_s_at	0.427	0.00150728	-3.78264	-1.1239	-0.329058	NOX1	NADPH oxidase 1
235560_at	0.557	0.0159579	-2.67864	-2.9301	-0.241031	NOVA2	NOVA alternative splicing regulator 2
203238_s_at	0.624	0.0498242	-2.11315	-3.7948	-0.18846	NOTCH3	notch 3
202445_s_at	0.572	0.0211474	2.54226	-3.1456	0.31734	NOTCH2	notch 2
1555390_at	0.474	0.00276707	-3.50159	-1.5859	-0.214079	NOP9	NOP9 nucleolar protein
211951_at	0.606	0.0381262	2.24988	-3.5936	0.487242	NOLC1	nucleolar and coiled-body phosphoprotein 1
232566_at	0.592	0.0339471	-2.30835	-3.5058	-0.145623	NOL6	nucleolar protein 6
220066_at	0.523	0.00968827	2.9166	-2.5469	0.29183	NOD2	nucleotide binding oligomerization domain containing 2
218036_x_at	0.557	0.0148267	2.71398	-2.8737	0.617948	NMD3	NMD3 ribosome export adaptor
237489_at	0.614	0.0413072	-2.20924	-3.654	-0.0979547	NLRP2	NLR family pyrin domain containing 2
225942_at	0.558	0.0174842	-2.63459	-3.0001	-0.222038	NLN	neurolysin
207451_at	0.573	0.0215403	-2.53327	-3.1597	-0.184387	NKX2-8	NK2 homeobox 8
229340_at	0.536	0.0107899	-2.86559	-2.6297	-0.281005	NKAPL	NFKB activating protein like
218557_at	0.389	0.00056483	4.23801	-0.3869	0.331982	NIT2	nitrilase family member 2
224436_s_at	0.584	0.0293889	2.38032	-3.3964	0.479445	NIPSNAP3A	nipsnap homolog 3A
227001_at	0.416	0.00132194	-3.84335	-1.0247	-0.648649	NIPAL2	NIPA like domain containing 2
207705_s_at	0.558	0.0177311	-2.62781	-3.0108	-0.625703	NINL	ninein like
204114_at	0.506	0.00667659	-3.09179	-2.2608	-0.743732	NID2	nidogen 2
226490_at	0.614	0.043664	-2.18095	-3.6958	-0.442213	NHSL1	NHS like 1
218129_s_at	0.578	0.0238108	-2.48423	-3.2362	-0.402534	NFYB	nuclear transcription factor Y subunit beta
203927_at	0.586	0.0299984	2.37011	-3.412	0.481091	NFKBIE	NFKB inhibitor epsilon
207535_s_at	0.416	0.00122831	3.87735	-0.9692	0.335109	NFKB2	nuclear factor kappa B subunit 2
209239_at	0.621	0.0484508	2.12757	-3.7739	0.365859	NFKB1	nuclear factor kappa B subunit 1
203574_at	0.538	0.011101	2.8521	-2.6515	0.802888	NFIL3	nuclear factor, interleukin 3 regulated
213298_at	0.581	0.0262319	-2.43658	-3.31	-0.291037	NFIC	nuclear factor I C
213033_s_at	0.59	0.0316111	2.34402	-3.4518	0.288123	NFIB	nuclear factor I B
213345_at	0.5	0.00521046	-3.20766	-2.0704	-0.285624	NFATC4	nuclear factor of activated T-cells 4
212809_at	0.614	0.0429063	-2.18989	-3.6826	-0.31451	NFATC2IP	nuclear factor of activated T-cells 2 interacting protein
226991_at	0.52	0.00917489	2.94233	-2.5051	1.02782	NFATC2	nuclear factor of activated T-cells 2
212678_at	0.614	0.0432056	2.18634	-3.6878	0.242326	NF1P9///NF1	neurofibromin 1 pseudogene 9///neurofibromin 1
225355_at	0.615	0.0438111	-2.17923	-3.6983	-0.571213	NEURL1B	neuralized E3 ubiquitin protein ligase 1B
236440_at	0.617	0.0452159	-2.16308	-3.722	-0.174553	NETO1	neuropilin and tolloid like 1
225279_s_at	0.515	0.00826426	2.99161	-2.4247	0.350799	NEPRO	nucleolus and neural progenitor protein
225865_x_at	0.617	0.0452896	-2.16225	-3.7233	-0.262182	NELFCD	negative elongation factor complex member C/D
237168_at	0.613	0.0407433	-2.21623	-3.6437	-0.120634	NEK5	NIMA related kinase 5
213116_at	0.538	0.0109385	-2.8591	-2.6402	-0.568189	NEK3	NIMA related kinase 3
212445_s_at	0.578	0.0228592	-2.50422	-3.205	-0.487856	NEDD4L	neural precursor cell expressed, developmentally down-regulated 4-like, E3 ubiquitin protein ligase
213012_at	0.619	0.0469278	-2.14401	-3.7499	-0.246717	NEDD4	neural precursor cell expressed, developmentally down-regulated 4, E3 ubiquitin protein ligase
203961_at	0.389	0.00065746	4.1673	-0.5001	0.967886	NEBL	nebulette
215368_at	0.557	0.0152537	-2.70035	-2.8955	-0.161859	NEB	nebulin
202941_at	0.557	0.0151903	2.70235	-2.8923	0.286514	NDUFV2	NADH:ubiquinone oxidoreductase core subunit V2
229647_at	0.61	0.0398444	2.22756	-3.6269	0.363178	NDUFS1	NADH:ubiquinone oxidoreductase core subunit S1
203371_s_at	0.498	0.00379544	3.35508	-1.8275	0.233968	NDUFB3	NADH:ubiquinone oxidoreductase subunit B3
219006_at	0.599	0.0358122	2.28147	-3.5463	0.489579	NDUFAF4	NADH:ubiquinone oxidoreductase complex assembly factor 4
217286_s_at	0.567	0.0201307	-2.56625	-3.1079	-0.329919	NDRG3	NDRG family member 3
214278_s_at	0.591	0.0330114	2.32235	-3.4846	0.295133	NDRG2	NDRG family member 2
224801_at	0.571	0.0207318	2.55193	-3.1304	0.668059	NDFIP2	Nedd4 family interacting protein 2
222423_at	0.623	0.0492681	2.11895	-3.7864	0.28222	NDFIP1	Nedd4 family interacting protein 1
200855_at	0.558	0.0175046	-2.63403	-3.001	-0.578446	NCOR1	nuclear receptor corepressor 1
225344_at	0.61	0.0400142	2.2254	-3.6301	1.09232	NCOA7	nuclear receptor coactivator 7
210774_s_at	0.58	0.0259268	2.44235	-3.3011	0.286178	NCOA4	nuclear receptor coactivator 4
205732_s_at	0.602	0.0369994	2.26504	-3.5709	0.422161	NCOA2	nuclear receptor coactivator 2
209106_at	0.602	0.036923	2.26608	-3.5694	0.311701	NCOA1	nuclear receptor coactivator 1
209556_at	0.579	0.0245991	-2.46823	-3.261	-0.263692	NCDN	neurochondrin
201774_s_at	0.615	0.044021	-2.17679	-3.7019	-0.193405	NCAPD2	non-SMC condensin I complex subunit D2
1553992_s_at	0.576	0.0224646	-2.51274	-3.1918	-0.365452	NBR2	neighbor of BRCA1 gene 2 (non-protein coding)
201104_x_at	0.565	0.0197555	2.5754	-3.0935	0.434692	NBPF25P///NBPF26///NBPF19///NBPF20///NBPF10///NBPF8///NBPF9///NBPF15///NBPF11///NBPF14	neuroblastoma breakpoint family member 25, pseudogene///neuroblastoma breakpoint family member 26///neuroblastoma breakpoint family member 19///neuroblastoma breakpoint family member 20///neuroblastoma breakpoint family member 10///neuroblastoma breakpoint family member 8///neuroblastoma breakpoint family member 9///neuroblastoma breakpoint family member 15///neuroblastoma breakpoint family membe…
201103_x_at	0.58	0.0261862	2.43744	-3.3087	0.315035	NBPF20///NBPF10///NBPF8///NBPF9///NBPF15///NBPF11///NBPF12///NBPF14	neuroblastoma breakpoint family member 20///neuroblastoma breakpoint family member 10///neuroblastoma breakpoint family member 8///neuroblastoma breakpoint family member 9///neuroblastoma breakpoint family member 15///neuroblastoma breakpoint family member 11///neuroblastoma breakpoint family member 12///neuroblastoma breakpoint family member 14
227926_s_at	0.588	0.0311224	2.35179	-3.4399	0.611286	NBPF20	neuroblastoma breakpoint family member 20
212854_x_at	0.621	0.0480794	2.13154	-3.7681	0.202747	NBPF1	neuroblastoma breakpoint family member 1
202906_s_at	0.578	0.0228495	2.50443	-3.2047	0.382036	NBN	nibrin
218330_s_at	0.614	0.0423277	2.19681	-3.6724	0.431387	NAV2	neuron navigator 2
224772_at	0.5	0.00454735	-3.27107	-1.966	-0.234703	NAV1	neuron navigator 1
206797_at	0.5	0.00617279	-3.12852	-2.2006	-0.552426	NAT2	N-acetyltransferase 2
225448_at	0.52	0.00909181	2.94662	-2.4981	0.478658	NAPG	NSF attachment protein gamma
226041_at	0.428	0.00165173	-3.74031	-1.1933	-0.818131	NAPEPLD	N-acyl phosphatidylethanolamine phospholipase D
201414_s_at	0.5	0.00528843	-3.20074	-2.0818	-0.272272	NAP1L4	nucleosome assembly protein 1 like 4
228073_at	0.6	0.0363983	2.2733	-3.5586	0.376898	NANP	N-acetylneuraminic acid phosphatase
1555167_s_at	0.507	0.00710708	3.0625	-2.3088	1.78979	NAMPT	nicotinamide phosphoribosyltransferase
204861_s_at	0.609	0.039027	2.23806	-3.6112	0.23889	NAIP	NLR family apoptosis inhibitory protein
1565908_at	0.611	0.0403092	-2.22167	-3.6356	-0.20404	NADSYN1	NAD synthetase 1
229299_at	0.614	0.0423533	2.1965	-3.6729	0.520295	NADK2	NAD kinase 2, mitochondrial
222018_at	0.58	0.025936	2.44218	-3.3013	0.385659	NACA	nascent polypeptide-associated complex alpha subunit
222872_x_at	0.497	0.00377132	3.35804	-1.8226	0.984062	NABP1	nucleic acid binding protein 1
222393_s_at	0.622	0.0489503	2.12229	-3.7815	0.640346	NAA50	N(alpha)-acetyltransferase 50, NatE catalytic subunit
225679_at	0.519	0.00876444	2.96392	-2.4699	0.352853	NAA30	N(alpha)-acetyltransferase 30, NatC catalytic subunit
225888_at	0.611	0.0403575	2.22106	-3.6365	0.394927	NAA25	N(alpha)-acetyltransferase 25, NatB auxiliary subunit
210603_at	0.623	0.0494144	-2.11742	-3.7886	-0.133148	NAA11	N(alpha)-acetyltransferase 11, NatA catalytic subunit
243843_at	0.427	0.00162174	3.74879	-1.1794	0.719855	N4BP2L1	NEDD4 binding protein 2 like 1
32069_at	0.556	0.013942	2.74347	-2.8265	0.450645	N4BP1	NEDD4 binding protein 1
212995_x_at	0.578	0.0234591	-2.49153	-3.2248	-0.177869	MZT2A///MZT2B///PHGDH	mitotic spindle organizing protein 2A///mitotic spindle organizing protein 2B///phosphoglycerate dehydrogenase
210336_x_at	0.619	0.0469117	-2.14419	-3.7497	-0.272374	MZF1	myeloid zinc finger 1
212241_at	0.58	0.025272	2.45495	-3.2816	0.271707	MYZAP///GCOM1///POLR2M	myocardial zonula adherens protein///GRINL1A complex locus 1///RNA polymerase II subunit M
1556267_at	0.62	0.0477318	-2.13528	-3.7627	-0.159885	MYRFL	myelin regulatory factor-like
217463_s_at	0.591	0.0331858	-2.31971	-3.4886	-0.155481	MYRF	myelin regulatory factor
227937_at	0.582	0.0281417	-2.40183	-3.3635	-0.21059	MYPOP	Myb related transcription factor, partner of profilin
211476_at	0.579	0.0243991	-2.47224	-3.2548	-0.183577	MYOZ2	myozenin 2
229339_at	0.507	0.00767356	-3.02649	-2.3678	-0.202779	MYOCD	myocardin
211103_at	0.586	0.0302107	-2.3666	-3.4174	-0.259485	MYO7A	myosin VIIA
218966_at	0.556	0.014144	-2.73658	-2.8375	-0.435474	MYO5C	myosin VC
203072_at	0.592	0.0340249	2.3072	-3.5075	0.349085	MYO1E	myosin IE
212365_at	0.609	0.0393704	2.23362	-3.6178	0.263141	MYO1B	myosin IB
230460_at	0.568	0.0203976	-2.55984	-3.118	-0.222731	MYLK-AS1	MYLK antisense RNA 1
202555_s_at	0.565	0.0194683	-2.58252	-3.0823	-0.47382	MYLK	myosin light chain kinase
223129_x_at	0.5	0.00573965	-3.16252	-2.1447	-0.234124	MYLIP	myosin regulatory light chain interacting protein
215795_at	0.59	0.0321996	2.3348	-3.4658	0.145808	MYH7B	myosin heavy chain 7B
219946_x_at	0.582	0.028707	-2.39197	-3.3786	-0.242033	MYH14	myosin, heavy chain 14, non-muscle
201497_x_at	0.507	0.00722443	-3.05482	-2.3214	-0.454592	MYH11	myosin heavy chain 11
212372_at	0.413	0.00105658	-3.94709	-0.8557	-0.38066	MYH10	myosin, heavy chain 10, non-muscle
222772_at	0.575	0.0219709	-2.52361	-3.1748	-0.170606	MYEF2	myelin expression factor 2
1562791_at	0.528	0.00997923	-2.9026	-2.5697	-0.196316	MYCBPAP	MYCBP associated protein
228846_at	0.557	0.0158946	2.68056	-2.927	1.2149	MXD1	MAX dimerization protein 1
204994_at	0.507	0.00745337	3.04017	-2.3454	0.904156	MX2	MX dynamin like GTPase 2
202086_at	0.621	0.048636	2.12561	-3.7767	0.489642	MX1	MX dynamin like GTPase 1
36907_at	0.557	0.0147947	-2.71502	-2.872	-0.203045	MVK	mevalonate kinase
52975_at	0.532	0.0102357	-2.89059	-2.5892	-0.250174	MVB12B	multivesicular body subunit 12B
223348_x_at	0.427	0.00158171	-3.76035	-1.1605	-0.540895	MUM1	melanoma associated antigen (mutated) 1
231814_at	0.557	0.0156664	-2.68751	-2.9159	-0.181697	MUC12	mucin 12, cell surface associated
226018_at	0.606	0.0380071	-2.25146	-3.5912	-0.246363	MTURN	maturin, neural progenitor differentiation regulator homolog (Xenopus)
203199_s_at	0.538	0.0110846	2.8528	-2.6504	0.489551	MTRR	5-methyltetrahydrofolate-homocysteine methyltransferase reductase
218947_s_at	0.6	0.0360942	2.27752	-3.5522	0.418015	MTPAP	mitochondrial poly(A) polymerase
221369_at	0.606	0.037945	-2.25229	-3.59	-0.115631	MTNR1A	melatonin receptor 1A
212277_at	0.535	0.0105942	-2.87428	-2.6156	-0.946368	MTMR4	myotubularin related protein 4
225232_at	0.591	0.0330927	2.32112	-3.4865	0.357195	MTMR12	myotubularin related protein 12
218879_s_at	0.556	0.013216	-2.76904	-2.7854	-0.222836	MTHFSD	methenyltetrahydrofolate synthetase domain containing
239035_at	0.614	0.0432685	-2.1856	-3.6889	-0.257414	MTHFR	methylenetetrahydrofolate reductase (NAD(P)H)
239846_at	0.614	0.0415077	2.20678	-3.6577	0.148889	MTHFD1	methylenetetrahydrofolate dehydrogenase, cyclohydrolase and formyltetrahydrofolate synthetase 1
217546_at	0.623	0.0494938	2.11659	-3.7898	1.21051	MT1M	metallothionein 1M
216320_x_at	0.614	0.0427085	-2.19225	-3.6791	-0.305425	MST1	macrophage stimulating 1
219281_at	0.622	0.0489343	2.12246	-3.7813	0.222801	MSRA	methionine sulfoxide reductase A
214770_at	0.558	0.0177615	2.62698	-3.0121	0.611193	MSR1	macrophage scavenger receptor 1
204885_s_at	0.607	0.0384956	-2.245	-3.6009	-0.136362	MSLN	mesothelin
225233_at	0.6	0.0361179	2.27719	-3.5527	0.141227	MSI2	musashi RNA binding protein 2
223799_at	0.545	0.0115429	2.83355	-2.6815	0.242454	MSANTD4	Myb/SANT DNA binding domain containing 4 with coiled-coils
218538_s_at	0.5	0.00456152	3.26962	-1.9684	0.335421	MRS2	MRS2, magnesium transporter
226749_at	0.537	0.0108147	-2.8645	-2.6314	-0.383365	MRPS9	mitochondrial ribosomal protein S9
224919_at	0.582	0.0282463	-2.39999	-3.3663	-0.324409	MRPS6	mitochondrial ribosomal protein S6
219819_s_at	0.614	0.0437289	2.18019	-3.6969	0.243565	MRPS28	mitochondrial ribosomal protein S28
224869_s_at	0.614	0.0416367	-2.2052	-3.66	-0.281096	MRPS25	mitochondrial ribosomal protein S25
228019_s_at	0.618	0.0462388	2.15161	-3.7388	0.235299	MRPS18C	mitochondrial ribosomal protein S18C
213840_s_at	0.58	0.0261571	-2.43799	-3.3078	-0.166425	MRPS12	mitochondrial ribosomal protein S12
224247_s_at	0.614	0.041543	2.20634	-3.6583	0.401512	MRPS10	mitochondrial ribosomal protein S10
222993_at	0.591	0.0337827	-2.31078	-3.5021	-0.276747	MRPL37	mitochondrial ribosomal protein L37
217907_at	0.578	0.0235921	-2.48876	-3.2291	-0.299578	MRPL18	mitochondrial ribosomal protein L18
1556168_s_at	0.565	0.0194804	2.58221	-3.0828	0.829814	MROH2A	maestro heat like repeat family member 2A
231358_at	0.557	0.0161451	2.67303	-2.939	0.581141	MRO	maestro
219648_at	0.614	0.0435365	-2.18244	-3.6936	-0.612286	MREG	melanoregulin
231621_at	0.558	0.0171939	-2.64268	-2.9872	-0.151335	MPZL1	myelin protein zero like 1
203524_s_at	0.591	0.033559	-2.31411	-3.4971	-0.423648	MPST	mercaptopyruvate sulfurtransferase
206436_at	0.582	0.0287074	-2.39196	-3.3786	-0.354436	MPPED1	metallophosphoesterase domain containing 1
206764_x_at	0.578	0.0235061	-2.49055	-3.2263	-0.191469	MPPE1	metallophosphoesterase 1
212885_at	0.562	0.0188365	2.59853	-3.0571	0.368679	MPHOSPH10	M-phase phosphoprotein 10
226818_at	0.556	0.0144316	2.72693	-2.853	0.807865	MPEG1	macrophage expressed 1
227669_at	0.558	0.0168333	2.65291	-2.971	0.238745	MPC2	mitochondrial pyruvate carrier 2
240362_at	0.557	0.0155774	-2.69025	-2.9116	-0.168532	MPC1	mitochondrial pyruvate carrier 1
209708_at	0.556	0.0138933	-2.74514	-2.8238	-0.190943	MOXD1	monooxygenase DBH like 1
218853_s_at	0.622	0.0489936	-2.12183	-3.7822	-0.277792	MOSPD1	motile sperm domain containing 1
221381_s_at	0.591	0.0328935	2.32414	-3.4819	0.502763	MORF4L1	mortality factor 4 like 1
203956_at	0.535	0.0106912	-2.86995	-2.6226	-0.428203	MORC2	MORC family CW-type zinc finger 2
210627_s_at	0.5	0.00610446	-3.13372	-2.192	-0.322837	MOGS	mannosyl-oligosaccharide glucosidase
1555807_a_at	0.615	0.0440198	-2.1768	-3.7019	-0.203814	MOG	myelin oligodendrocyte glycoprotein
242765_at	0.575	0.0218611	-2.52606	-3.171	-0.173378	MOBP	myelin-associated oligodendrocyte basic protein
227066_at	0.504	0.00635562	3.11486	-2.223	0.526565	MOB3C	MOB kinase activator 3C
225997_at	0.556	0.0133901	2.76279	-2.7955	0.242441	MOB1B	MOB kinase activator 1B
212508_at	0.5	0.00544096	3.18747	-2.1037	0.302673	MOAP1	modulator of apoptosis 1
204959_at	0.515	0.00818814	2.99596	-2.4176	1.63782	MNDA	myeloid cell nuclear differentiation antigen
223700_at	0.614	0.0433907	-2.18416	-3.6911	-0.180316	MND1	meiotic nuclear divisions 1
203936_s_at	0.591	0.0332489	2.31876	-3.4901	0.780062	MMP9	matrix metallopeptidase 9
207890_s_at	0.58	0.0257933	2.44489	-3.2971	0.25754	MMP25	matrix metallopeptidase 25
203434_s_at	0.416	0.00133785	3.83781	-1.0337	1.30226	MME	membrane metallo-endopeptidase
217883_at	0.568	0.0203771	2.56033	-3.1172	0.270165	MMADHC	methylmalonic aciduria and homocystinuria, cblD type
218869_at	0.551	0.0122196	-2.80644	-2.7253	-0.323928	MLYCD	malonyl-CoA decarboxylase
204918_s_at	0.614	0.0435705	-2.18205	-3.6942	-0.133644	MLLT3	MLLT3, super elongation complex subunit
238025_at	0.537	0.0108764	2.8618	-2.6358	0.749163	MLKL	mixed lineage kinase domain like
235377_at	0.604	0.0374471	2.25896	-3.58	1.42155	MLIP	muscular LMNA-interacting protein
217216_x_at	0.556	0.0131248	2.77235	-2.7801	0.30951	MLH3	mutL homolog 3
200617_at	0.5	0.00540077	-3.19093	-2.098	-0.661804	MLEC	malectin
218630_at	0.551	0.0123636	-2.80086	-2.7342	-0.253952	MKS1	Meckel syndrome, type 1
222510_s_at	0.59	0.0317456	2.3419	-3.455	0.342434	MKRN2	makorin ring finger protein 2
204908_s_at	0.582	0.0285318	2.39501	-3.3739	0.705385	MIR8085///BCL3	microRNA 8085///B-cell CLL/lymphoma 3
213043_s_at	0.582	0.0273833	-2.41536	-3.3427	-0.335869	MIR6884///MED24	microRNA 6884///mediator complex subunit 24
36829_at	0.582	0.0273254	-2.4164	-3.3411	-0.549273	MIR6883///PER1	microRNA 6883///period circadian clock 1
233588_x_at	0.556	0.0143923	-2.72824	-2.8509	-0.38871	MIR6834///PFDN6	microRNA 6834///prefoldin subunit 6
204650_s_at	0.587	0.0302806	-2.36545	-3.4191	-0.554761	MIR6831///APBB3	microRNA 6831///amyloid beta precursor protein binding family B member 3
209980_s_at	0.558	0.0176751	2.62934	-3.0084	0.340652	MIR6778///SHMT1	microRNA 6778///serine hydroxymethyltransferase 1
211042_x_at	0.507	0.00692248	-3.07484	-2.2886	-0.375435	MIR6756///MCAM	microRNA 6756///melanoma cell adhesion molecule
224855_at	0.582	0.0286167	-2.39353	-3.3762	-0.262916	MIR6741///PYCR2	microRNA 6741///pyrroline-5-carboxylate reductase family member 2
217994_x_at	0.607	0.0383053	-2.24751	-3.5971	-0.232145	MIR6727///CPSF3L	microRNA 6727///cleavage and polyadenylation specific factor 3-like
207524_at	0.565	0.019758	-2.57534	-3.0936	-0.245793	MIR6132///ST7-OT3///ST7	microRNA 6132///ST7 overlapping transcript 3///suppression of tumorigenicity 7
231990_at	0.559	0.0182016	2.61514	-3.0309	0.434642	MIR6125///USP15	microRNA 6125///ubiquitin specific peptidase 15
211999_at	0.496	0.00349925	3.39279	-1.7653	0.671313	MIR4738///H3F3B///H3F3A	microRNA 4738///H3 histone, family 3B///H3 histone, family 3A
227405_s_at	0.572	0.0209931	-2.54583	-3.14	-0.276482	MIR4683///FZD8	microRNA 4683///frizzled class receptor 8
225120_at	0.614	0.0424097	2.19582	-3.6739	0.206231	MIR4657///PURB	microRNA 4657///purine rich element binding protein B
1561963_at	0.579	0.0243095	2.47405	-3.252	0.18746	MIR4296	microRNA 4296
214839_at	0.552	0.0125669	-2.79308	-2.7468	-0.279469	MIR124-1///LINC00599	microRNA 124-1///long intergenic non-protein coding RNA 599
231975_s_at	0.403	0.00092063	4.01093	-0.7521	0.384823	MIER3	MIER family member 3
225475_at	0.556	0.0137475	2.75019	-2.8157	0.519107	MIER1	MIER1 transcriptional regulator
204593_s_at	0.609	0.038973	2.23876	-3.6102	0.577417	MIEF1	mitochondrial elongation factor 1
206522_at	0.602	0.0369966	2.26507	-3.5709	0.795669	MGAM	maltase-glucoamylase
213393_at	0.416	0.00129965	3.85122	-1.0118	0.527808	MFSD9	major facilitator superfamily domain containing 9
225316_at	0.579	0.0251503	-2.45733	-3.2779	-0.533744	MFSD2A	major facilitator superfamily domain containing 2A
225222_at	0.59	0.0317646	2.3416	-3.4554	0.491556	MFSD14A	major facilitator superfamily domain containing 14A
211801_x_at	0.618	0.0458606	2.15582	-3.7327	0.315764	MFN1	mitofusin 1
203406_at	0.59	0.0317007	2.3426	-3.4539	0.362488	MFAP1	microfibrillar associated protein 1
1553688_at	0.591	0.0337957	-2.31059	-3.5024	-0.211143	METTL6	methyltransferase like 6
227993_at	0.451	0.00187239	3.68232	-1.2885	0.960643	METAP2	methionyl aminopeptidase 2
227805_at	0.514	0.00804445	-3.0043	-2.404	-0.173301	METAP1D	methionyl aminopeptidase type 1D (mitochondrial)
239746_at	0.618	0.0462363	-2.15164	-3.7388	-0.138036	MESDC2	mesoderm development candidate 2
207251_at	0.5	0.00549874	3.18254	-2.1118	0.912829	MEP1B	meprin A subunit beta
202645_s_at	0.557	0.0164184	-2.66494	-2.9519	-0.340294	MEN1	menin 1
207480_s_at	0.506	0.00662446	-3.09546	-2.2548	-0.644133	MEIS2	Meis homeobox 2
237265_at	0.618	0.0460107	-2.15415	-3.7351	-0.190749	MEIOB///LINC00254	meiosis specific with OB domains///long intergenic non-protein coding RNA 254
230011_at	0.611	0.0405042	-2.21922	-3.6392	-0.16136	MEI1	meiotic double-stranded break formation protein 1
222438_at	0.592	0.034056	2.30674	-3.5082	0.288298	MED4	mediator complex subunit 4
227787_s_at	0.602	0.0369458	2.26577	-3.5698	0.466451	MED30	mediator complex subunit 30
218438_s_at	0.5	0.00603066	3.13941	-2.1827	0.71732	MED28	mediator complex subunit 28
215337_at	0.557	0.0166392	2.6585	-2.9621	0.160724	MED24	mediator complex subunit 24
244611_at	0.56	0.0183809	2.61039	-3.0384	0.143132	MED13	mediator complex subunit 13
211342_x_at	0.578	0.0231291	-2.49847	-3.214	-0.2037	MED12	mediator complex subunit 12
223247_at	0.504	0.00638697	3.11256	-2.2268	0.278054	MED10	mediator complex subunit 10
218165_at	0.581	0.0267222	2.42744	-3.3241	0.518983	MEAF6	MYST/Esa1 associated factor 6
210154_at	0.58	0.0254794	2.45093	-3.2878	0.594493	ME2	malic enzyme 2
204059_s_at	0.556	0.0131495	2.77145	-2.7816	0.698691	ME1	malic enzyme 1
218802_at	0.621	0.0480464	2.13189	-3.7676	0.370296	MCUB	mitochondrial calcium uniporter dominant negative beta subunit
1569677_a_at	0.557	0.0162191	-2.67083	-2.9425	-0.169231	MCMDC2	minichromosome maintenance domain containing 2
217905_at	0.582	0.0289316	2.3881	-3.3845	0.474416	MCMBP	minichromosome maintenance complex binding protein
219673_at	0.623	0.0494139	2.11742	-3.7886	0.186839	MCM9	minichromosome maintenance 9 homologous recombination repair factor
223570_at	0.625	0.0498935	-2.11244	-3.7958	-0.179823	MCM10	minichromosome maintenance 10 replication initiation factor
200796_s_at	0.591	0.033725	2.31164	-3.5008	1.20986	MCL1	BCL2 family apoptosis regulator
230498_at	0.6	0.0360668	-2.2779	-3.5516	-0.262433	MCHR1	melanin concentrating hormone receptor 1
35147_at	0.617	0.0447762	-2.16808	-3.7147	-0.244146	MCF2L	MCF.2 cell line derived transforming sequence like
235568_at	0.567	0.0200938	2.56715	-3.1065	0.419363	MCEMP1	mast cell expressed membrane protein 1
207323_s_at	0.541	0.011249	-2.84581	-2.6617	-0.200657	MBP	myelin basic protein
205018_s_at	0.519	0.00894091	2.95452	-2.4852	1.56551	MBNL2	muscleblind like splicing regulator 2
220195_at	0.575	0.0217975	-2.52748	-3.1687	-0.25792	MBD5	methyl-CpG binding domain protein 5
220305_at	0.579	0.025077	-2.45877	-3.2757	-0.329517	MAVS	mitochondrial antiviral signaling protein
235141_at	0.533	0.0103024	-2.88751	-2.5942	-0.405935	MARVELD2	MARVEL domain containing 2
200712_s_at	0.614	0.0414056	2.20803	-3.6558	0.612247	MAPRE1	microtubule associated protein RP/EB family member 1
201461_s_at	0.557	0.0147314	2.71707	-2.8687	0.517984	MAPKAPK2	mitogen-activated protein kinase-activated protein kinase 2
229845_at	0.557	0.016123	-2.67369	-2.938	-0.322175	MAPKAP1	mitogen-activated protein kinase associated protein 1
213014_at	0.572	0.0208864	-2.54831	-3.1361	-0.1772	MAPK8IP1	mitogen-activated protein kinase 8 interacting protein 1
226046_at	0.507	0.00675674	3.0862	-2.27	0.71216	MAPK8	mitogen-activated protein kinase 8
225643_at	0.585	0.0294514	2.37926	-3.398	0.438878	MAPK1IP1L	mitogen-activated protein kinase 1 interacting protein 1 like
241528_at	0.619	0.0468808	-2.14453	-3.7492	-0.170838	MAPK15	mitogen-activated protein kinase 15
210449_x_at	0.522	0.00930357	2.93575	-2.5158	0.600408	MAPK14	mitogen-activated protein kinase 14
208351_s_at	0.59	0.0315814	2.34449	-3.4511	0.403642	MAPK1	mitogen-activated protein kinase 1
242838_at	0.475	0.00293891	3.47369	-1.6319	0.264484	MAP6D1	MAP6 domain containing 1
203553_s_at	0.614	0.0430755	2.18788	-3.6856	0.40289	MAP4K5	mitogen-activated protein kinase kinase kinase kinase 5
213927_at	0.619	0.0471849	-2.1412	-3.754	-0.194682	MAP3K9	mitogen-activated protein kinase kinase kinase 9
205027_s_at	0.588	0.0306844	2.35885	-3.4292	0.861752	MAP3K8	mitogen-activated protein kinase kinase kinase 8
221211_s_at	0.624	0.0498454	2.11293	-3.7951	0.140716	MAP3K7CL	MAP3K7 C-terminal like
203837_at	0.533	0.0102968	2.88777	-2.5937	0.497351	MAP3K5	mitogen-activated protein kinase kinase kinase 5
204089_x_at	0.576	0.0221746	-2.5191	-3.1818	-0.384579	MAP3K4	mitogen-activated protein kinase kinase kinase 4
1565131_x_at	0.617	0.0455171	2.15968	-3.727	0.119976	MAP3K2	mitogen-activated protein kinase kinase kinase 2
1557783_at	0.576	0.0223681	2.51485	-3.1885	0.185754	MAP3K14-AS1	MAP3K14 antisense RNA 1
206249_at	0.526	0.00987085	-2.90777	-2.5613	-0.575631	MAP3K13	mitogen-activated protein kinase kinase kinase 13
205448_s_at	0.614	0.0424894	2.19487	-3.6753	0.267795	MAP3K12	mitogen-activated protein kinase kinase kinase 12
211370_s_at	0.507	0.00721514	-3.05542	-2.3204	-0.373014	MAP2K5	mitogen-activated protein kinase kinase 5
203265_s_at	0.5	0.00406234	3.32352	-1.8796	0.677391	MAP2K4	mitogen-activated protein kinase kinase 4
208786_s_at	0.451	0.00185779	3.68594	-1.2825	0.923147	MAP1LC3B	microtubule associated protein 1 light chain 3 beta
238089_at	0.579	0.0250582	-2.45914	-3.2751	-0.268147	MAN2C1	mannosidase alpha class 2C member 1
65884_at	0.582	0.0283145	-2.3988	-3.3681	-0.221325	MAN1B1	mannosidase alpha class 1B member 1
235457_at	0.607	0.0383991	2.24627	-3.599	0.259362	MAML2	mastermind like transcriptional coactivator 2
229473_at	0.469	0.00240823	3.56589	-1.48	0.791759	MAMDC4	MAM domain containing 4
208309_s_at	0.582	0.0282913	2.3992	-3.3675	0.388844	MALT1	MALT1 paracaspase
226385_s_at	0.5	0.00406027	3.32375	-1.8792	0.243623	MALSU1	mitochondrial assembly of ribosomal large subunit 1
220302_at	0.61	0.0401242	2.224	-3.6321	0.228645	MAK	male germ cell associated kinase
210092_at	0.619	0.0471426	2.14166	-3.7533	0.346506	MAGOHB///MAGOH	mago homolog B, exon junction complex core component///mago homolog, exon junction complex core component
1563318_s_at	0.573	0.0216297	-2.53125	-3.1628	-0.236199	MAGIX	MAGI family member, X-linked
226770_at	0.497	0.00372209	-3.36414	-1.8126	-0.389958	MAGI3	membrane associated guanylate kinase, WW and PDZ domain containing 3
225465_at	0.557	0.0166015	-2.65959	-2.9604	-0.214009	MAGI1	membrane associated guanylate kinase, WW and PDZ domain containing 1
208682_s_at	0.593	0.0346025	2.29875	-3.5203	0.23753	MAGED2	MAGE family member D2
216592_at	0.571	0.0207783	-2.55084	-3.1321	-0.155768	MAGEC3	MAGE family member C3
206363_at	0.558	0.0172669	-2.64063	-2.9905	-0.45186	MAF	MAF bZIP transcription factor
1561429_a_at	0.617	0.0449436	-2.16617	-3.7175	-0.129937	MAATS1	MYCBP associated and testis expressed 1
222107_x_at	0.57	0.0206113	-2.55477	-3.126	-0.20206	LZTS1	leucine zipper tumor suppressor 1
230514_s_at	0.557	0.0157288	-2.6856	-2.919	-0.264679	LYZL2///LYZL1	lysozyme like 2///lysozyme like 1
226748_at	0.58	0.0255519	2.44953	-3.29	0.583881	LYSMD2	LysM domain containing 2
230174_at	0.604	0.0373744	2.25995	-3.5786	0.361175	LYPLAL1	lysophospholipase like 1
216606_x_at	0.515	0.00815367	-2.99795	-2.4144	-0.235732	LYPLA2	lysophospholipase II
210754_s_at	0.572	0.0213052	2.53863	-3.1513	0.628745	LYN	LYN proto-oncogene, Src family tyrosine kinase
206584_at	0.593	0.0345386	2.29968	-3.5189	0.57937	LY96	lymphocyte antigen 96
205859_at	0.59	0.032286	2.33347	-3.4678	0.365452	LY86	lymphocyte antigen 86
224656_s_at	0.556	0.0144244	2.72717	-2.8526	0.248136	LUZP6///MTPN	leucine zipper protein 6///myotrophin
236172_at	0.52	0.009055	2.94854	-2.495	0.348872	LTB4R	leukotriene B4 receptor
239203_at	0.582	0.0282036	2.40074	-3.3651	0.225333	LSMEM1	leucine rich single-pass membrane protein 1
221612_at	0.614	0.0430005	-2.18877	-3.6843	-0.166522	LRTM1	leucine rich repeats and transmembrane domains 1
229584_at	0.5	0.0055654	3.17692	-2.121	0.877778	LRRK2	leucine rich repeat kinase 2
218364_at	0.614	0.0437329	2.18014	-3.697	0.342424	LRRFIP2	LRR binding FLII interacting protein 2
216607_s_at	0.606	0.0379768	2.25187	-3.5906	0.866736	LRRD1///CYP51A1	leucine rich repeats and death domain containing 1///cytochrome P450 family 51 subfamily A member 1
239433_at	0.533	0.0103531	2.88518	-2.5979	0.338281	LRRC8E	leucine rich repeat containing 8 family member E
218684_at	0.562	0.0188215	-2.59891	-3.0565	-0.335884	LRRC8D	leucine rich repeat containing 8 family member D
212978_at	0.557	0.0164158	2.66502	-2.9518	0.655535	LRRC8B	leucine rich repeat containing 8 family member B
1552666_a_at	0.609	0.0396762	-2.2297	-3.6237	-0.166053	LRRC7	leucine rich repeat containing 7
206483_at	0.567	0.0202292	-2.56388	-3.1117	-0.19412	LRRC6	leucine rich repeat containing 6
226253_at	0.565	0.0197019	-2.57672	-3.0915	-0.298036	LRRC45	leucine rich repeat containing 45
218577_at	0.52	0.00920193	2.94094	-2.5073	0.348439	LRRC40	leucine rich repeat containing 40
244478_at	0.567	0.0200837	-2.56739	-3.1061	-0.239142	LRRC37A3	leucine rich repeat containing 37 member A3
224686_x_at	0.601	0.0366723	-2.26952	-3.5642	-0.389377	LRRC37A2	leucine rich repeat containing 37 member A2
218550_s_at	0.5	0.00506447	-3.22091	-2.0486	-0.568218	LRRC20	leucine rich repeat containing 20
220376_at	0.558	0.0168822	2.65151	-2.9732	0.688655	LRRC19	leucine rich repeat containing 19
242705_x_at	0.617	0.0449189	2.16646	-3.7171	0.28341	LRPAP1	LDL receptor related protein associated protein 1
244710_at	0.579	0.0241845	-2.47658	-3.248	-0.1603	LRGUK	leucine rich repeats and guanylate kinase domain containing
216250_s_at	0.593	0.0346055	2.2987	-3.5204	0.325509	LPXN	leupaxin
241879_at	0.515	0.00823804	-2.9931	-2.4223	-0.78261	LPP	LIM domain containing preferred translocation partner in lipoma
227476_at	0.557	0.014843	2.71345	-2.8745	0.787855	LPGAT1	lysophosphatidylglycerol acyltransferase 1
213078_x_at	0.5	0.00486719	-3.23943	-2.0182	-0.220083	LPCAT4	lysophosphatidylcholine acyltransferase 4
203570_at	0.622	0.0487498	-2.1244	-3.7785	-0.22473	LOXL1	lysyl oxidase like 1
225996_at	0.5	0.00432824	3.29404	-1.9282	0.453889	LONRF2	LON peptidase N-terminal domain and ring finger 2
243688_at	0.614	0.0430479	-2.18821	-3.6851	-0.139512	LOC90768	uncharacterized LOC90768
213248_at	0.619	0.0469338	-2.14395	-3.75	-0.403175	LOC730101	uncharacterized LOC730101
206791_s_at	0.519	0.00894028	-2.95455	-2.4852	-0.191766	LOC729966///PDE4C	uncharacterized LOC729966///phosphodiesterase 4C
230591_at	0.588	0.030825	2.35658	-3.4327	0.201879	LOC729887	uncharacterized LOC729887
236614_at	0.563	0.0189107	-2.59662	-3.0601	-0.137255	LOC729683	uncharacterized LOC729683
1562051_at	0.507	0.00729484	-3.05026	-2.3289	-0.186091	LOC729296///MIR646HG	uncharacterized LOC729296///MIR646 host gene
240518_at	0.614	0.0428493	-2.19057	-3.6816	-0.131602	LOC729291	translation initiation factor IF-2
229283_at	0.428	0.00166194	-3.73746	-1.198	-0.414558	LOC728613	programmed cell death 6 pseudogene
233599_at	0.588	0.0308689	2.35587	-3.4337	0.772182	LOC728061	hCG2003663
240380_at	0.533	0.0103443	-2.88559	-2.5973	-0.396421	LOC728040	hCG1813624
1553130_at	0.59	0.0316823	-2.34289	-3.4535	-0.197478	LOC652276	potassium channel tetramerization domain containing 5 pseudogene
230889_at	0.557	0.0165421	-2.66132	-2.9576	-0.217093	LOC645321	uncharacterized LOC645321
213013_at	0.58	0.0258387	-2.44403	-3.2985	-0.244841	LOC644172///MAPK8IP1	mitogen-activated protein kinase 8 interacting protein 1 pseudogene///mitogen-activated protein kinase 8 interacting protein 1
222044_at	0.593	0.0343387	2.30259	-3.5145	0.252719	LOC643549///PCIF1	uncharacterized LOC643549///PDX1 C-terminal inhibiting factor 1
232443_at	0.582	0.0278032	-2.40782	-3.3543	-0.157334	LOC441052	uncharacterized LOC441052
1560108_at	0.614	0.0432087	-2.1863	-3.6879	-0.19963	LOC401433///NUB1	uncharacterized LOC401433///negative regulator of ubiquitin like proteins 1
1564401_at	0.552	0.0125927	-2.7921	-2.7483	-0.292239	LOC400748	uncharacterized LOC400748
1562000_at	0.618	0.0456758	-2.15789	-3.7296	-0.13627	LOC400620	uncharacterized LOC400620
226582_at	0.57	0.0206022	-2.55499	-3.1256	-0.260282	LOC400043	uncharacterized LOC400043
227941_at	0.522	0.00962692	-2.9196	-2.542	-0.302894	LOC339803	uncharacterized LOC339803
239762_at	0.591	0.0327901	-2.32572	-3.4795	-0.379093	LOC286437	uncharacterized LOC286437
230661_at	0.58	0.0252364	-2.45565	-3.2805	-0.123018	LOC286191	uncharacterized LOC286191
1568739_at	0.556	0.0135496	-2.75713	-2.8046	-0.17133	LOC285692	uncharacterized LOC285692
1563691_at	0.558	0.0177474	-2.62737	-3.0115	-0.235762	LOC285300	uncharacterized LOC285300
240754_at	0.556	0.0141758	-2.7355	-2.8392	-0.331897	LOC284933	uncharacterized LOC284933
233769_at	0.578	0.0238705	-2.483	-3.2381	-0.141279	LOC284561	uncharacterized LOC284561
1569006_at	0.475	0.00284629	-3.48852	-1.6075	-0.272394	LOC284379	solute carrier family 7 member 3 pseudogene
1561442_at	0.542	0.0113562	-2.8413	-2.669	-0.179535	LOC283585	uncharacterized LOC283585
232645_at	0.545	0.0115567	-2.83298	-2.6824	-0.21701	LOC153684	uncharacterized LOC153684
236124_at	0.599	0.0356116	2.2843	-3.542	0.272752	LOC153546	uncharacterized LOC153546
1556078_at	0.625	0.0499869	-2.11147	-3.7972	-0.537995	LOC143286	uncharacterized LOC143286
1557816_a_at	0.416	0.00120219	-3.8873	-0.953	-0.272487	LOC105379186	uncharacterized LOC105379186
239982_at	0.547	0.0116777	-2.82803	-2.6904	-0.212984	LOC105378828	uncharacterized LOC105378828
234139_s_at	0.572	0.0210497	-2.54451	-3.1421	-0.32583	LOC105378749	uncharacterized LOC105378749
1556486_at	0.621	0.0487028	-2.1249	-3.7777	-0.140655	LOC105378577	basic proline-rich protein-like
234677_at	0.5	0.00536954	-3.19364	-2.0935	-0.188295	LOC105376689	uncharacterized LOC105376689
1561078_at	0.604	0.0374332	-2.25915	-3.5797	-0.171822	LOC105376100	uncharacterized LOC105376100
1561368_at	0.567	0.0199741	-2.57005	-3.102	-0.181989	LOC105376081	uncharacterized LOC105376081
241476_at	0.574	0.0217208	-2.5292	-3.166	-0.206199	LOC105375115	uncharacterized LOC105375115
233038_at	0.531	0.0101609	-2.89406	-2.5835	-0.138163	LOC105373942	uncharacterized LOC105373942
1561076_at	0.581	0.0264067	-2.4333	-3.315	-0.132568	LOC105372969	uncharacterized LOC105372969
244843_x_at	0.614	0.0418069	-2.20312	-3.6631	-0.219452	LOC105371226	uncharacterized LOC105371226
237494_at	0.615	0.0440225	-2.17677	-3.7019	-0.184527	LOC105370829	uncharacterized LOC105370829
1565741_at	0.601	0.0365426	-2.2713	-3.5616	-0.158159	LOC105369974	uncharacterized LOC105369974
213739_at	0.606	0.0381065	-2.25014	-3.5932	-0.148476	LOC103344931	uncharacterized LOC103344931
1568609_s_at	0.558	0.0178641	2.6242	-3.0165	0.613075	LOC103091866///LINC00623///LINC01138///LINC00869	uncharacterized LOC103091866///long intergenic non-protein coding RNA 623///long intergenic non-protein coding RNA 1138///long intergenic non-protein coding RNA 869
231521_at	0.615	0.0441819	2.17492	-3.7047	0.174826	LOC102725436///PMS2P4	putative postmeiotic segregation increased 2-like protein 1-like///PMS1 homolog 2, mismatch repair system component pseudogene 4
209412_at	0.5	0.00398996	3.33187	-1.8658	0.335876	LOC102724200///TRAPPC10	trafficking protein particle complex subunit 10-like///trafficking protein particle complex 10
216499_at	0.609	0.0388994	-2.23972	-3.6088	-0.207653	LOC102723620	uncharacterized LOC102723620
238273_at	0.572	0.0212788	-2.53923	-3.1503	-0.222736	LOC101930655///C7orf73///SLC13A4	uncharacterized LOC101930655///chromosome 7 open reading frame 73///solute carrier family 13 member 4
212929_s_at	0.588	0.0307275	-2.35815	-3.4303	-0.335738	LOC101930591///FAM21A///FAM21C	uncharacterized LOC101930591///family with sequence similarity 21 member A///family with sequence similarity 21 member C
204145_at	0.5	0.00598042	3.14332	-2.1762	0.257837	LOC101930531///LOC101930278///FRG1CP///FRG1	uncharacterized LOC101930531///uncharacterized LOC101930278///FSHD region gene 1 family member C, pseudogene///FSHD region gene 1
1559526_at	0.591	0.0336871	-2.3122	-3.5	-0.159423	LOC101930421	uncharacterized LOC101930421
213447_at	0.565	0.0197851	-2.57467	-3.0947	-0.308723	LOC101930404///SNORD116-28///SNORD115-26///SNORD115-13///SNORD115-7///SNORD116-22///SNORD116-4///PWARSN///SNORD107///SNRPN///IPW	uncharacterized LOC101930404///small nucleolar RNA, C/D box 116-28///small nucleolar RNA, C/D box 115-26///small nucleolar RNA, C/D box 115-13///small nucleolar RNA, C/D box 115-7///small nucleolar RNA, C/D box 116-22///small nucleolar RNA, C/D box 116-4///Prader Willi/Angelman region RNA, SNRPN neighbor///small nucleolar RNA, C/D box 107///small nuclear ribonucleoprotein polypeptide N///imprinte…
232984_at	0.557	0.0149725	2.70928	-2.8812	0.41449	LOC101930373///HYDIN2///HYDIN	hydrocephalus-inducing protein homolog///HYDIN2, axonemal central pair apparatus protein (pseudogene)///HYDIN, axonemal central pair apparatus protein
225817_at	0.604	0.0373157	-2.26074	-3.5774	-0.409414	LOC101930349///LOC101930344///CGNL1	uncharacterized LOC101930349///uncharacterized LOC101930344///cingulin like 1
205109_s_at	0.5	0.00386551	-3.34659	-1.8415	-0.273873	LOC101930241///ARHGEF4	rho guanine nucleotide exchange factor 4-like///Rho guanine nucleotide exchange factor 4
225546_at	0.496	0.0034554	-3.39864	-1.7557	-0.291526	LOC101930123///EEF2K	eukaryotic elongation factor 2 kinase///eukaryotic elongation factor 2 kinase
231973_s_at	0.588	0.0314224	2.347	-3.4472	0.467402	LOC101930107///LOC730268///LOC285074///ANAPC1	uncharacterized LOC101930107///anaphase-promoting complex subunit 1-like///anaphase promoting complex subunit 1 pseudogene///anaphase promoting complex subunit 1
227067_x_at	0.591	0.0332148	2.31928	-3.4893	0.560601	LOC101929796///LOC100996763///LOC100996717///NOTCH2NL///NOTCH2	notch homolog 2 N-terminal-like protein///notch homolog 2 N-terminal-like protein///notch homolog 2 N-terminal-like protein///notch 2 N-terminal like///notch 2
1563913_at	0.556	0.0141588	-2.73608	-2.8383	-0.215631	LOC101929717	uncharacterized LOC101929717
234345_at	0.469	0.00237106	-3.57309	-1.4681	-0.224368	LOC101929683	uncharacterized LOC101929683
235445_at	0.556	0.013454	-2.76051	-2.7991	-0.151786	LOC101929572///POTEH-AS1///LOC100508046	uncharacterized LOC101929572///POTEH antisense RNA 1///uncharacterized LOC100508046
1561607_at	0.618	0.0460158	-2.15409	-3.7352	-0.164663	LOC101929384	uncharacterized LOC101929384
1562690_at	0.619	0.0471256	-2.14185	-3.7531	-0.178191	LOC101929319	uncharacterized LOC101929319
222334_at	0.5	0.00600493	-3.14141	-2.1794	-0.19533	LOC101929219///LOC100505650///C1orf186	uncharacterized LOC101929219///uncharacterized LOC100505650///chromosome 1 open reading frame 186
1559252_a_at	0.579	0.0242436	-2.47538	-3.2499	-0.158464	LOC101929125	uncharacterized LOC101929125
210921_at	0.619	0.0468614	-2.14474	-3.7489	-0.164162	LOC101929078	myb-related transcription factor, partner of profilin-like
244742_at	0.593	0.0345845	-2.29901	-3.5199	-0.939786	LOC101929036///PAH	uncharacterized LOC101929036///phenylalanine hydroxylase
240817_at	0.624	0.0496764	-2.11469	-3.7926	-0.143098	LOC101929034	uncharacterized LOC101929034
1561469_at	0.578	0.0235025	-2.49062	-3.2262	-0.174493	LOC101928865	uncharacterized LOC101928865
1559321_at	0.588	0.0314159	-2.34711	-3.4471	-0.336522	LOC101928858	uncharacterized LOC101928858
1557147_a_at	0.614	0.0433977	-2.18407	-3.6912	-0.264114	LOC101928837	uncharacterized LOC101928837
240435_at	0.612	0.0406118	2.21787	-3.6412	0.999438	LOC101928635	uncharacterized LOC101928635
1563781_at	0.497	0.00376391	-3.35896	-1.8211	-0.366925	LOC101928623///LOC401320	uncharacterized LOC101928623///uncharacterized LOC401320
232473_at	0.588	0.0309256	-2.35495	-3.4351	-0.345779	LOC101928524	uncharacterized LOC101928524
236785_at	0.617	0.044788	-2.16795	-3.7149	-0.15084	LOC101928461	uncharacterized LOC101928461
1561481_at	0.617	0.0451965	-2.1633	-3.7217	-0.147177	LOC101928435	uncharacterized LOC101928435
1564027_a_at	0.609	0.0394112	2.2331	-3.6186	0.283268	LOC101928422///TCAF2P1///TCAF2	TRPM8 channel-associated factor 2-like///TRPM8 channel associated factor 2 pseudogene 1///TRPM8 channel associated factor 2
240456_at	0.619	0.0467165	-2.14633	-3.7465	-0.293724	LOC101928419	uncharacterized LOC101928419
236990_at	0.619	0.0466682	-2.14686	-3.7458	-0.14716	LOC101928403	uncharacterized LOC101928403
1556903_at	0.591	0.0338045	-2.31046	-3.5026	-0.190778	LOC101928335	uncharacterized LOC101928335
237982_at	0.609	0.0393202	-2.23427	-3.6169	-0.168599	LOC101928327	uncharacterized LOC101928327
237697_at	0.469	0.0022986	-3.58745	-1.4445	-0.262773	LOC101928269///LOC100506403///RUNX1	uncharacterized LOC101928269///uncharacterized LOC100506403///runt related transcription factor 1
1557287_at	0.5	0.00422637	-3.30512	-1.9099	-0.168124	LOC101928231	uncharacterized LOC101928231
1570372_at	0.606	0.0377528	-2.25486	-3.5862	-0.19585	LOC101928207	uncharacterized LOC101928207
1569828_at	0.579	0.0246164	-2.46789	-3.2615	-0.186082	LOC101928107	uncharacterized LOC101928107
240012_at	0.563	0.0190079	-2.59413	-3.064	-0.217438	LOC101928014	uncharacterized LOC101928014
1558517_s_at	0.6	0.0359072	2.28014	-3.5483	0.229037	LOC101927933///LRRC8C	uncharacterized LOC101927933///leucine rich repeat containing 8 family member C
202733_at	0.62	0.0477681	-2.13488	-3.7632	-0.351104	LOC101927705///P4HA2	uncharacterized LOC101927705///prolyl 4-hydroxylase subunit alpha 2
1562934_at	0.614	0.0435204	-2.18263	-3.6933	-0.145376	LOC101927460	uncharacterized LOC101927460
1562655_at	0.562	0.0186146	-2.60427	-3.048	-0.213079	LOC101927447	uncharacterized LOC101927447
244524_at	0.617	0.0449787	2.16577	-3.7181	0.179824	LOC101927382///PAX8-AS1	uncharacterized LOC101927382///PAX8 antisense RNA 1
220744_s_at	0.588	0.0311005	-2.35214	-3.4394	-0.311299	LOC101927266///IFT122	intraflagellar transport protein 122 homolog///intraflagellar transport 122
1559948_at	0.588	0.0312142	-2.35032	-3.4422	-0.283017	LOC101927253	uncharacterized LOC101927253
240880_at	0.618	0.0457267	-2.15732	-3.7305	-0.172311	LOC101927089	uncharacterized LOC101927089
232054_at	0.556	0.0138667	-2.74606	-2.8223	-0.339427	LOC101926951///PCDH20	uncharacterized LOC101926951///protocadherin 20
236156_at	0.582	0.0287099	-2.39192	-3.3787	-0.144302	LOC101926887///LIPA	uncharacterized LOC101926887///lipase A, lysosomal acid type
209312_x_at	0.593	0.0345384	2.29968	-3.5189	0.569623	LOC101060835///LOC100996809///HLA-DRB5///HLA-DRB4///HLA-DRB1///HLA-DQB1	HLA class II histocompatibility antigen, DQ beta 1 chain-like///HLA class II histocompatibility antigen, DRB1-10 beta chain-like///major histocompatibility complex, class II, DR beta 5///major histocompatibility complex, class II, DR beta 4///major histocompatibility complex, class II, DR beta 1///major histocompatibility complex, class II, DQ beta 1
244629_s_at	0.607	0.0383195	-2.24732	-3.5974	-0.358445	LOC101060747///PDPK1	3-phosphoinositide-dependent protein kinase 1-like///3-phosphoinositide dependent protein kinase 1
217225_x_at	0.5	0.00617813	-3.12811	-2.2012	-0.333421	LOC101060373///NOMO3///NOMO2///NOMO1	uncharacterized LOC101060373///NODAL modulator 3///NODAL modulator 2///NODAL modulator 1
242954_at	0.576	0.0223587	-2.51506	-3.1881	-0.157879	LOC101059948	uncharacterized LOC101059948
207979_s_at	0.571	0.020785	-2.55068	-3.1324	-0.252511	LOC100996919///CD8B	putative T-cell surface glycoprotein CD8 beta-2 chain-like///CD8b molecule
215499_at	0.572	0.0214565	2.53518	-3.1567	0.456252	LOC100996792///MAP2K3	dual specificity mitogen-activated protein kinase kinase 3///mitogen-activated protein kinase kinase 3
1569515_a_at	0.557	0.0158236	-2.68271	-2.9236	-0.246262	LOC100996681	uncharacterized LOC100996681
244600_at	0.6	0.0361906	2.27618	-3.5542	0.13583	LOC100996583	uncharacterized LOC100996583
241049_at	0.596	0.0350439	-2.29238	-3.5299	-0.160386	LOC100996542	uncharacterized LOC100996542
1566472_s_at	0.582	0.0286181	2.39351	-3.3762	0.540352	LOC100996506///RETSAT	uncharacterized LOC100996506///retinol saturase
230292_at	0.621	0.0480976	-2.13134	-3.7684	-0.349227	LOC100996412	uncharacterized LOC100996412
231811_at	0.587	0.030441	-2.36282	-3.4231	-0.140842	LOC100653296///LOC100288778///WASH1///LOC100134445///WASH7P///WASH5P///WASH2P///WASH3P	uncharacterized LOC100653296///WAS protein family homolog 1 pseudogene///WAS protein family homolog 1///uncharacterized LOC100134445///WAS protein family homolog 7 pseudogene///WAS protein family homolog 5 pseudogene///WAS protein family homolog 2 pseudogene///WAS protein family homolog 3 pseudogene
232846_s_at	0.533	0.0105171	-2.87773	-2.61	-0.38235	LOC100653137///CDH23	cadherin-23-like///cadherin-related 23
231672_at	0.416	0.00119559	3.88985	-0.9488	0.337959	LOC100653086	uncharacterized LOC100653086
209616_s_at	0.522	0.00955769	2.92302	-2.5365	0.379382	LOC100653057///CES1	liver carboxylesterase 1-like///carboxylesterase 1
221833_at	0.332	0.00028191	4.56356	0.126	0.978919	LOC100507577///LONP2///SIAH1	uncharacterized LOC100507577///lon peptidase 2, peroxisomal///siah E3 ubiquitin protein ligase 1
221834_at	0.286	5.035e-05	5.39105	1.3579	0.961127	LOC100507577///LONP2	uncharacterized LOC100507577///lon peptidase 2, peroxisomal
214148_at	0.617	0.0452262	-2.16296	-3.7222	-0.199161	LOC100507424///ITFG2	uncharacterized LOC100507424///integrin alpha FG-GAP repeat containing 2
229095_s_at	0.403	0.00097422	-3.9847	-0.7946	-0.838704	LOC100507334///LOC100288570///LIMS3-LOC440895///LOC440895	two pore channel 3 pseudogene///glycosylphosphatidylinositol anchor attachment protein 1 homolog (yeast) pseudogene///LIMS3-LOC440895 readthrough///two pore channel 3 pseudogene
231270_at	0.552	0.0125568	2.79346	-2.7462	0.779233	LOC100507258///CA13	uncharacterized LOC100507258///carbonic anhydrase 13
1569372_at	0.6	0.0362193	-2.27578	-3.5548	-0.162286	LOC100507194	uncharacterized LOC100507194
1559240_at	0.514	0.00792313	-3.01144	-2.3924	-0.239647	LOC100507053	uncharacterized LOC100507053
204359_at	0.332	0.00011338	-4.99678	0.7849	-0.821276	LOC100506718///FLRT2	uncharacterized LOC100506718///fibronectin leucine rich transmembrane protein 2
235509_at	0.475	0.0029241	3.47603	-1.6281	0.770656	LOC100506538///NDUFAF6	uncharacterized LOC100506538///NADH:ubiquinone oxidoreductase complex assembly factor 6
243680_at	0.588	0.0313988	-2.34738	-3.4467	-0.166249	LOC100506476	uncharacterized LOC100506476
1556516_at	0.558	0.0175858	-2.63179	-3.0045	-0.15678	LOC100506331	uncharacterized LOC100506331
243151_at	0.617	0.0446628	2.16938	-3.7128	0.127642	LOC100506282	uncharacterized LOC100506282
240096_at	0.618	0.0461216	-2.15291	-3.7369	-0.120147	LOC100506236	uncharacterized LOC100506236
226535_at	0.507	0.00750475	-3.03694	-2.3507	-0.199668	LOC100505984///ITGB6	uncharacterized LOC100505984///integrin subunit beta 6
1559522_at	0.522	0.00937281	-2.93225	-2.5215	-0.336155	LOC100505918	uncharacterized LOC100505918
231203_at	0.586	0.0301308	-2.36792	-3.4154	-0.231051	LOC100505478	uncharacterized LOC100505478
222947_at	0.583	0.0292166	-2.38324	-3.392	-0.142539	LOC100379224	uncharacterized LOC100379224
1556839_s_at	0.614	0.0436946	-2.18059	-3.6963	-0.194551	LOC100289090	uncharacterized LOC100289090
233491_at	0.608	0.0386891	-2.24247	-3.6047	-0.133893	LOC100268168	uncharacterized LOC100268168
229685_at	0.614	0.0424766	-2.19502	-3.675	-0.196642	LOC100134937	uncharacterized LOC100134937
230325_at	0.5	0.00622687	-3.12444	-2.2073	-0.24487	LOC100133985	uncharacterized LOC100133985
1570411_at	0.519	0.00858979	-2.97341	-2.4544	-0.180595	LOC100133131	uncharacterized LOC100133131
1562799_at	0.623	0.049377	-2.11781	-3.788	-0.259614	LOC100130285	uncharacterized LOC100130285
236042_at	0.602	0.0370316	-2.2646	-3.5716	-0.146821	LOC100130219	uncharacterized LOC100130219
229699_at	0.565	0.0193158	2.58634	-3.0763	0.371631	LOC100129550	uncharacterized LOC100129550
215078_at	0.617	0.0447981	2.16783	-3.7151	0.601263	LOC100129518///SOD2	uncharacterized LOC100129518///superoxide dismutase 2, mitochondrial
1559618_at	0.572	0.0212448	2.54002	-3.1491	0.684861	LOC100129447	uncharacterized LOC100129447
1561940_at	0.614	0.041898	-2.20201	-3.6647	-0.173753	LOC100128843///CHFR	uncharacterized LOC100128843///checkpoint with forkhead and ring finger domains, E3 ubiquitin protein ligase
243171_at	0.522	0.00945256	-2.92824	-2.528	-0.290687	LOC100128325	uncharacterized LOC100128325
224294_at	0.427	0.00154073	-3.77249	-1.1406	-0.237544	LOC100128185	PNAS-19
227569_at	0.614	0.0411813	2.21079	-3.6517	0.460253	LNX2	ligand of numb-protein X 2
225176_at	0.572	0.0210858	-2.54368	-3.1434	-0.464235	LNPEP	leucyl and cystinyl aminopeptidase
202674_s_at	0.559	0.0182767	2.61315	-3.034	0.241691	LMO7	LIM domain 7
203276_at	0.519	0.0089395	2.95459	-2.4851	0.56399	LMNB1	lamin B1
218191_s_at	0.579	0.0242125	2.47602	-3.2489	0.248185	LMBRD1	LMBR1 domain containing 1
224410_s_at	0.507	0.00736766	3.0456	-2.3365	0.774061	LMBR1	limb development membrane protein 1
221274_s_at	0.558	0.0169714	-2.64897	-2.9773	-0.307617	LMAN2L	lectin, mannose binding 2 like
203713_s_at	0.514	0.00799284	-3.00732	-2.3991	-0.539203	LLGL2	LLGL2, scribble cell polarity complex component
225793_at	0.332	0.00026575	-4.5914	0.1692	-0.435286	LIX1L	limb and CNS expressed 1 like
1554891_at	0.581	0.0268965	-2.42422	-3.329	-0.151754	LINC01580	long intergenic non-protein coding RNA 1580
226830_x_at	0.579	0.0241591	2.4771	-3.2472	0.221786	LINC01578	long intergenic non-protein coding RNA 1578
1561795_at	0.515	0.00842796	-2.98237	-2.4398	-0.150912	LINC01393	long intergenic non-protein coding RNA 1393
1564413_at	0.619	0.0474733	-2.13807	-3.7586	-0.210887	LINC01356	long intergenic non-protein coding RNA 1356
241327_at	0.619	0.0476015	-2.13668	-3.7606	-0.16553	LINC01339	long intergenic non-protein coding RNA 1339
227061_at	0.543	0.0114553	-2.83718	-2.6756	-0.611077	LINC01279	long intergenic non-protein coding RNA 1279
1561411_at	0.557	0.0152869	-2.6993	-2.8971	-0.232136	LINC01222	long intergenic non-protein coding RNA 1222
1561492_at	0.615	0.0441549	-2.17524	-3.7042	-0.165806	LINC01192	long intergenic non-protein coding RNA 1192
239370_at	0.615	0.0439494	-2.17762	-3.7007	-0.16183	LINC01133	long intergenic non-protein coding RNA 1133
1562683_a_at	0.609	0.039589	-2.23082	-3.622	-0.13728	LINC01097	long intergenic non-protein coding RNA 1097
226369_at	0.519	0.00870323	-2.96723	-2.4645	-0.297408	LINC01089	long intergenic non-protein coding RNA 1089
240167_at	0.558	0.017346	-2.63842	-2.994	-0.149459	LINC01085	long intergenic non-protein coding RNA 1085
233135_at	0.519	0.00888036	-2.95772	-2.48	-0.239676	LINC01007	long intergenic non-protein coding RNA 1007
215185_at	0.578	0.0239574	2.48122	-3.2409	0.337801	LINC00963	long intergenic non-protein coding RNA 963
1559826_a_at	0.571	0.0206863	-2.553	-3.1287	-0.247516	LINC00960	long intergenic non-protein coding RNA 960
1558123_at	0.52	0.00912838	-2.94473	-2.5012	-0.218971	LINC00957	long intergenic non-protein coding RNA 957
216209_at	0.586	0.0299541	-2.37085	-3.4109	-0.2346	LINC00939	long intergenic non-protein coding RNA 939
1556452_a_at	0.572	0.0214928	-2.53435	-3.158	-0.243559	LINC00928	long intergenic non-protein coding RNA 928
243547_at	0.618	0.046515	2.14855	-3.7433	0.155184	LINC00921///ZNF263	long intergenic non-protein coding RNA 921///zinc finger protein 263
1566760_at	0.514	0.00787382	-3.01438	-2.3876	-0.191574	LINC00884	long intergenic non-protein coding RNA 884
1563483_at	0.607	0.0385324	2.24452	-3.6016	0.1782	LINC00869	long intergenic non-protein coding RNA 869
237385_at	0.427	0.0015024	-3.78414	-1.1215	-0.206321	LINC00867	long intergenic non-protein coding RNA 867
235747_at	0.591	0.0334898	2.31515	-3.4955	0.39319	LINC00849///SLC25A16	long intergenic non-protein coding RNA 849///solute carrier family 25 member 16
1555363_s_at	0.403	0.00088583	-4.02881	-0.7232	-0.437589	LINC00663	long intergenic non-protein coding RNA 663
232281_at	0.51	0.00777182	-3.02051	-2.3775	-0.175281	LINC00662	long intergenic non-protein coding RNA 662
1560514_at	0.621	0.0484395	2.1277	-3.7737	0.135913	LINC00636	long intergenic non-protein coding RNA 636
1563260_at	0.579	0.0249303	-2.46165	-3.2712	-0.141138	LINC00587	long intergenic non-protein coding RNA 587
215738_at	0.588	0.031069	-2.35265	-3.4386	-0.197878	LINC00563	long intergenic non-protein coding RNA 563
1566927_at	0.557	0.0163266	-2.66764	-2.9476	-0.191356	LINC00527	long intergenic non-protein coding RNA 527
1564122_at	0.558	0.0180676	-2.61872	-3.0252	-0.184106	LINC00514	long intergenic non-protein coding RNA 514
1564281_at	0.573	0.0215905	-2.53214	-3.1614	-0.326739	LINC00491	long intergenic non-protein coding RNA 491
1558930_at	0.578	0.0235631	-2.48936	-3.2282	-0.189206	LINC00460	long intergenic non-protein coding RNA 460
1570447_at	0.59	0.0319855	-2.33814	-3.4607	-0.160791	LINC00452	long intergenic non-protein coding RNA 452
230012_at	0.504	0.0064632	-3.107	-2.2359	-0.37467	LINC00324	long intergenic non-protein coding RNA 324
239968_at	0.557	0.0164927	2.66276	-2.9553	0.256922	LINC00313	long intergenic non-protein coding RNA 313
1557465_at	0.581	0.0265693	-2.43027	-3.3197	-0.133453	LINC00282	long intergenic non-protein coding RNA 282
1559645_at	0.559	0.0182824	-2.613	-3.0342	-0.192477	LINC00184	long intergenic non-protein coding RNA 184
1554976_a_at	0.556	0.0139889	-2.74186	-2.8291	-0.179994	LINC00051	long intergenic non-protein coding RNA 51
227929_at	0.591	0.0335348	2.31447	-3.4966	0.273624	LIN7A	lin-7 homolog A, crumbs cell polarity complex component
228583_at	0.469	0.00263373	-3.52446	-1.5482	-0.547238	LIN52	lin-52 DREAM MuvB core complex component
212687_at	0.551	0.0123357	2.80193	-2.7325	0.472696	LIMS4///LIMS3///LIMS1	LIM zinc finger domain containing 4///LIM zinc finger domain containing 3///LIM zinc finger domain containing 1
233541_at	0.496	0.00344955	-3.39943	-1.7544	-0.181687	LIMD1-AS1	LIMD1 antisense RNA 1
207104_x_at	0.582	0.0271052	2.4204	-3.3349	0.263966	LILRB1	leukocyte immunoglobulin like receptor B1
211101_x_at	0.557	0.0165073	2.66234	-2.956	0.363089	LILRA2	leukocyte immunoglobulin like receptor A2
218523_at	0.588	0.0307636	2.35757	-3.4311	0.249043	LHPP	phospholysine phosphohistidine inorganic pyrophosphate phosphatase
203236_s_at	0.621	0.0487096	2.12483	-3.7779	0.186054	LGALS9	galectin 9
210732_s_at	0.378	0.00045958	4.33426	-0.2339	1.76252	LGALS8	galectin 8
1556919_at	0.586	0.0300484	-2.36928	-3.4133	-1.06866	LEPR	leptin receptor
218604_at	0.591	0.0330404	2.32191	-3.4853	0.308021	LEMD3	LEM domain containing 3
207409_at	0.427	0.00162163	3.74882	-1.1793	1.16649	LECT2	leukocyte cell derived chemotaxin 2
1552362_a_at	0.58	0.0255908	2.44878	-3.2911	0.359368	LEAP2	liver enriched antimicrobial peptide 2
57082_at	0.604	0.0372544	-2.26157	-3.5761	-0.250226	LDLRAP1	low density lipoprotein receptor adaptor protein 1
209574_s_at	0.389	0.00062622	4.18996	-0.4638	0.670647	LDLRAD4	low density lipoprotein receptor class A domain containing 4
216887_s_at	0.547	0.0117179	-2.8264	-2.6931	-0.182843	LDB3	LIM domain binding 3
219008_at	0.582	0.0286203	-2.39347	-3.3763	-0.373432	LDAH	lipid droplet associated hydrolase
205270_s_at	0.601	0.0367324	2.26869	-3.5655	0.580137	LCP2	lymphocyte cytosolic protein 2
208885_at	0.614	0.0411523	2.21115	-3.6512	0.545139	LCP1	lymphocyte cytosolic protein 1
240592_at	0.588	0.0311565	-2.35124	-3.4408	-0.359619	LCORL	ligand dependent nuclear receptor corepressor like
1569614_s_at	0.611	0.04035	-2.22116	-3.6364	-0.164662	LCN8	lipocalin 8
1553413_at	0.569	0.0205034	-2.55733	-3.122	-0.157164	LCAL1	lung cancer associated lncRNA 1
238422_at	0.592	0.0340693	-2.30654	-3.5085	-0.356621	LBX2-AS1	LBX2 antisense RNA 1
1556886_a_at	0.507	0.00766689	-3.0269	-2.3671	-0.160177	LAYN	layilin
1554038_at	0.5	0.00474975	-3.2508	-1.9994	-0.25278	LARP1B	La ribonucleoprotein domain family member 1B
215543_s_at	0.624	0.0496532	-2.11493	-3.7922	-0.199722	LARGE1	LARGE xylosyl- and glucuronyltransferase 1
219463_at	0.558	0.0177329	-2.62776	-3.0109	-0.186734	LAMP5	lysosomal associated membrane protein family member 5
226671_at	0.558	0.0171783	2.64312	-2.9865	0.393838	LAMP2	lysosomal associated membrane protein 2
210150_s_at	0.533	0.0104854	2.87917	-2.6077	0.392483	LAMA5	laminin subunit alpha 5
234608_at	0.609	0.0395718	-2.23104	-3.6217	-0.153772	LAMA3	laminin subunit alpha 3
228557_at	0.569	0.0204885	2.55768	-3.1214	0.298484	L3MBTL4	l(3)mbt-like 4 (Drosophila)
229393_at	0.586	0.0296479	-2.37596	-3.4031	-0.260882	L3MBTL3	l(3)mbt-like 3 (Drosophila)
210663_s_at	0.602	0.0368819	2.26664	-3.5685	0.431765	KYNU	kynureninase
200076_s_at	0.614	0.0420765	-2.19984	-3.6679	-0.222265	KXD1	KxDL motif containing 1
1566219_at	0.596	0.0349936	-2.2931	-3.5288	-0.143654	KRTAP5-AS1	KRTAP5-1/KRTAP5-2 antisense RNA 1
234684_s_at	0.586	0.0300576	-2.36913	-3.4135	-0.128749	KRTAP4-4	keratin associated protein 4-4
234633_at	0.582	0.0280238	2.40391	-3.3603	0.110614	KRTAP4-11	keratin associated protein 4-11
1553213_a_at	0.588	0.0314018	-2.34733	-3.4467	-0.119574	KRT78	keratin 78
209126_x_at	0.559	0.0183102	2.61226	-3.0354	0.240895	KRT6B	keratin 6B
201820_at	0.576	0.0224294	-2.51351	-3.1906	-0.15742	KRT5	keratin 5
216921_s_at	0.621	0.0483219	-2.12895	-3.7719	-0.168868	KRT35	keratin 35
217325_at	0.59	0.0317911	-2.34118	-3.4561	-0.221702	KRT3	keratin 3
217338_at	0.558	0.0167023	2.65668	-2.965	0.156609	KRT19P2	keratin 19 pseudogene 2
228491_at	0.558	0.0167232	-2.65607	-2.966	-0.196193	KRT19	keratin 19
203203_s_at	0.582	0.0279917	2.40448	-3.3594	0.465289	KRR1	KRR1, small subunit processome component homolog
235370_at	0.556	0.0142282	-2.73373	-2.8421	-0.247051	KREMEN1	kringle containing transmembrane protein 1
213574_s_at	0.588	0.0310631	-2.35274	-3.4385	-0.384069	KPNB1	karyopherin subunit beta 1
225267_at	0.558	0.0168252	2.65314	-2.9706	0.403768	KPNA4	karyopherin subunit alpha 4
202058_s_at	0.507	0.00717421	3.05809	-2.3161	0.53988	KPNA1	karyopherin subunit alpha 1
222759_at	0.5	0.00384076	3.34957	-1.8366	0.476911	KMT5B	lysine methyltransferase 5B
1555737_a_at	0.517	0.00847438	-2.97978	-2.444	-0.181176	KLK4	kallikrein related peptidase 4
221462_x_at	0.591	0.0332938	-2.31809	-3.4911	-0.226984	KLK15	kallikrein related peptidase 15
1560396_at	0.591	0.0333985	2.31651	-3.4935	0.185189	KLHL6	kelch like family member 6
226001_at	0.592	0.0341284	2.30567	-3.5098	0.289816	KLHL5	kelch like family member 5
225732_at	0.556	0.0129522	-2.77867	-2.77	-0.450118	KLHL42	kelch like family member 42
219106_s_at	0.58	0.0254224	2.45203	-3.2861	0.116323	KLHL41	kelch like family member 41
229310_at	0.451	0.00193789	3.66641	-1.3146	1.85873	KLHL29	kelch like family member 29
221838_at	0.572	0.0212984	-2.53879	-3.151	-0.232759	KLHL22	kelch like family member 22
222871_at	0.5	0.00407729	-3.32181	-1.8824	-0.246877	KLHDC8A	kelch domain containing 8A
1552639_at	0.565	0.0197934	2.57447	-3.095	0.193065	KLHDC7B	kelch domain containing 7B
208784_s_at	0.613	0.0409154	-2.21409	-3.6468	-0.228844	KLHDC3	kelch domain containing 3
1564463_at	0.582	0.0275285	-2.41274	-3.3467	-0.179304	KLF13	Kruppel like factor 13
228291_s_at	0.617	0.0453217	-2.16188	-3.7238	-0.247741	KIZ	kizuna centrosomal protein
225303_at	0.588	0.0309957	-2.35382	-3.4369	-0.194125	KIRREL	kin of IRRE like (Drosophila)
208203_x_at	0.427	0.00152714	-3.77659	-1.1339	-0.218684	KIR2DS5	killer cell immunoglobulin like receptor, two Ig domains and short cytoplasmic tail 5
211410_x_at	0.619	0.0470594	-2.14257	-3.752	-0.236483	KIR2DL5A	killer cell immunoglobulin like receptor, two Ig domains and long cytoplasmic tail 5A
202183_s_at	0.519	0.0086612	-2.96951	-2.4608	-0.568974	KIF22	kinesin family member 22
209244_s_at	0.601	0.0365026	-2.27185	-3.5607	-0.269871	KIF1C	kinesin family member 1C
204444_at	0.599	0.035327	-2.28834	-3.536	-0.143479	KIF11	kinesin family member 11
225525_at	0.615	0.0440519	2.17643	-3.7024	0.2394	KIAA1671	KIAA1671
231869_at	0.558	0.0176569	2.62984	-3.0076	0.255787	KIAA1586	KIAA1586
235301_at	0.614	0.0416657	-2.20484	-3.6605	-0.187895	KIAA1324L	KIAA1324 like
226248_s_at	0.5	0.00455885	3.2699	-1.968	0.289177	KIAA1324	KIAA1324
227502_at	0.558	0.0178109	-2.62564	-3.0142	-0.5429	KIAA1147	KIAA1147
1558293_at	0.557	0.0156905	-2.68677	-2.9171	-0.176269	KIAA1107	KIAA1107
222468_at	0.553	0.0128157	-2.78373	-2.7618	-0.358792	KIAA0319L	KIAA0319 like
201977_s_at	0.5	0.00452112	-3.27376	-1.9616	-0.417506	KIAA0141	KIAA0141
203143_s_at	0.58	0.0256296	2.44803	-3.2923	1.16864	KIAA0040	KIAA0040
229850_at	0.582	0.0277955	2.40796	-3.354	0.552031	KDSR	3-ketodihydrosphingosine reductase
225142_at	0.586	0.0297756	2.37382	-3.4064	0.480318	KDM7A	lysine demethylase 7A
201548_s_at	0.579	0.0250178	2.45993	-3.2739	0.290667	KDM5B	lysine demethylase 5B
242788_at	0.591	0.0324979	2.33019	-3.4728	0.196728	KDM4D	lysine demethylase 4D
1555575_a_at	0.587	0.0302975	-2.36517	-3.4196	-0.384829	KDELR1	KDEL endoplasmic reticulum protein retention receptor 1
233234_at	0.5	0.00561502	-3.17277	-2.1278	-0.209653	KCTD16	potassium channel tetramerization domain containing 16
222668_at	0.599	0.0355912	2.28459	-3.5416	0.422111	KCTD15	potassium channel tetramerization domain containing 15
1554212_s_at	0.586	0.030187	-2.36699	-3.4168	-0.275039	KCNS2	potassium voltage-gated channel modifier subfamily S member 2
220540_at	0.575	0.0218185	-2.52701	-3.1695	-0.151242	KCNK15	potassium two pore domain channel subfamily K member 15
237186_at	0.58	0.0261839	-2.43748	-3.3086	-0.154892	KCNJ5	potassium voltage-gated channel subfamily J member 5
206765_at	0.621	0.0485124	2.12692	-3.7748	0.424787	KCNJ2	potassium voltage-gated channel subfamily J member 2
237266_at	0.59	0.0320708	-2.33681	-3.4627	-0.212073	KCNIP2-AS1	KCNIP2 antisense RNA 1
220802_at	0.599	0.0356059	-2.28438	-3.5419	-0.159402	KCNH4	potassium voltage-gated channel subfamily H member 4
214595_at	0.539	0.0111723	-2.84906	-2.6564	-0.161387	KCNG1	potassium voltage-gated channel modifier subfamily G member 1
222471_s_at	0.556	0.0136854	2.75236	-2.8122	0.293161	KCMF1	potassium channel modulatory factor 1
229970_at	0.579	0.0241648	-2.47698	-3.2474	-0.256248	KBTBD7	kelch repeat and BTB domain containing 7
226479_at	0.557	0.0160935	-2.67457	-2.9366	-0.532073	KBTBD6	kelch repeat and BTB domain containing 6
223790_at	0.585	0.0294907	-2.3786	-3.3991	-0.163275	KATNAL1	katanin catalytic subunit A1 like 1
226547_at	0.582	0.026981	2.42267	-3.3314	0.326914	KAT6A	lysine acetyltransferase 6A
202182_at	0.587	0.0303346	-2.36456	-3.4205	-0.28668	KAT2A	lysine acetyltransferase 2A
230388_s_at	0.507	0.00694315	-3.07344	-2.2909	-1.0334	KANSL1-AS1	KANSL1 antisense RNA 1
206078_at	0.6	0.0363679	-2.27372	-3.5579	-0.435759	KALRN	kalirin, RhoGEF kinase
201015_s_at	0.568	0.0203448	-2.56111	-3.116	-0.43095	JUP	junction plakoglobin
37872_at	0.623	0.0494491	-2.11706	-3.7891	-0.127165	JRK	Jrk helix-turn-helix protein
227096_at	0.558	0.0175213	-2.63356	-3.0017	-0.238619	JOSD2	Josephin domain containing 2
223547_at	0.609	0.0392559	2.2351	-3.6156	0.24684	JKAMP	JNK1/MAPK8-associated membrane protein
203298_s_at	0.604	0.037333	2.2605	-3.5777	0.452482	JARID2	jumonji and AT-rich interaction domain containing 2
205888_s_at	0.5	0.00589435	-3.1501	-2.1651	-0.268334	JAKMIP2	janus kinase and microtubule interacting protein 2
205842_s_at	0.581	0.0268227	2.42558	-3.3269	0.409605	JAK2	Janus kinase 2
240613_at	0.614	0.0437639	-2.17978	-3.6975	-0.146282	JAK1	Janus kinase 1
225820_at	0.609	0.0396408	2.23015	-3.623	0.402964	JADE1	jade family PHD finger 1
206245_s_at	0.515	0.0080922	3.00151	-2.4086	0.589024	IVNS1ABP	influenza virus NS1A binding protein
1557279_at	0.542	0.0113789	-2.84035	-2.6705	-0.274857	ITSN1	intersectin 1
211323_s_at	0.528	0.00998	2.90257	-2.5697	0.723395	ITPR1	inositol 1,4,5-trisphosphate receptor type 1
213076_at	0.469	0.0026571	3.52037	-1.555	0.857754	ITPKC	inositol-trisphosphate 3-kinase C
209171_at	0.617	0.0448493	-2.16725	-3.7159	-0.25833	ITPA	inosine triphosphatase
37201_at	0.427	0.00162877	-3.74678	-1.1827	-0.871549	ITIH4	inter-alpha-trypsin inhibitor heavy chain family member 4
205755_at	0.578	0.023754	-2.4854	-3.2343	-0.612452	ITIH3	inter-alpha-trypsin inhibitor heavy chain 3
1557079_at	0.588	0.0311187	-2.35185	-3.4399	-0.178667	ITGBL1	integrin subunit beta like 1
203336_s_at	0.623	0.0495258	-2.11626	-3.7903	-0.354273	ITGB1BP1	integrin subunit beta 1 binding protein 1
1553678_a_at	0.624	0.0497432	2.11399	-3.7936	0.441909	ITGB1	integrin subunit beta 1
210184_at	0.568	0.0203363	2.56131	-3.1157	0.386876	ITGAX	integrin subunit alpha X
202351_at	0.58	0.025688	2.44691	-3.294	0.502104	ITGAV	integrin subunit alpha V
235666_at	0.52	0.00907307	-2.94759	-2.4965	-0.225803	ITGA8	integrin subunit alpha 8
216331_at	0.565	0.0193453	-2.58559	-3.0775	-0.373691	ITGA7	integrin subunit alpha 7
1560359_at	0.612	0.040595	2.21808	-3.6409	0.292221	ITGA1	integrin subunit alpha 1
238775_at	0.595	0.0348674	2.29492	-3.5261	0.286333	ITFG1	integrin alpha FG-GAP repeat containing 1
239101_at	0.611	0.0404131	2.22036	-3.6375	0.270561	ITCH	itchy E3 ubiquitin protein ligase
200851_s_at	0.565	0.0196948	2.5769	-3.0912	0.231664	IST1	IST1, ESCRT-III associated factor
228212_at	0.581	0.0266944	-2.42795	-3.3233	-0.247055	ISM2	isthmin 2
204698_at	0.551	0.0120291	2.81392	-2.7132	0.56867	ISG20	interferon stimulated exonuclease gene 20
221425_s_at	0.557	0.0156688	2.68744	-2.916	0.345364	ISCA1	iron-sulfur cluster assembly 1
229638_at	0.582	0.0275763	-2.41188	-3.348	-0.167067	IRX3	iroquois homeobox 3
238933_at	0.507	0.00728007	-3.05121	-2.3273	-0.52013	IRS1	insulin receptor substrate 1
204057_at	0.61	0.040092	2.22441	-3.6315	0.593537	IRF8	interferon regulatory factor 8
205469_s_at	0.579	0.0245908	-2.4684	-3.2608	-0.198471	IRF5	interferon regulatory factor 5
223474_at	0.5	0.00555454	3.17783	-2.1195	1.02101	IRF2BPL	interferon regulatory factor 2 binding protein like
224569_s_at	0.572	0.0213334	2.53799	-3.1523	0.519489	IRF2BP2	interferon regulatory factor 2 binding protein 2
203275_at	0.5	0.00414274	-3.31441	-1.8946	-0.348422	IRF2	interferon regulatory factor 2
238725_at	0.519	0.00876991	2.96363	-2.4704	1.53935	IRF1	interferon regulatory factor 1
225892_at	0.58	0.0254403	2.45168	-3.2866	0.359002	IREB2	iron responsive element binding protein 2
210840_s_at	0.558	0.0179994	2.62055	-3.0223	0.460148	IQGAP1	IQ motif containing GTPase activating protein 1
204030_s_at	0.58	0.025526	2.45003	-3.2892	0.340526	IQCJ-SCHIP1///SCHIP1	IQCJ-SCHIP1 readthrough///schwannomin interacting protein 1
1552997_a_at	0.579	0.024763	-2.46497	-3.2661	-0.133076	IQCF1	IQ motif containing F1
227234_at	0.504	0.00635697	-3.11476	-2.2231	-0.57332	IPO5P1	importin 5 pseudogene 1
218305_at	0.618	0.0464897	-2.14883	-3.7429	-0.279078	IPO4	importin 4
231179_at	0.469	0.0023389	3.57941	-1.4577	1.32229	IP6K3	inositol hexakisphosphate kinase 3
203941_at	0.58	0.0261087	-2.4389	-3.3064	-0.286433	INTS9	integrator complex subunit 9
218905_at	0.609	0.038918	-2.23948	-3.6091	-0.254242	INTS8	integrator complex subunit 8
1570173_at	0.624	0.0498389	2.113	-3.795	0.112934	INTS7	integrator complex subunit 7
202809_s_at	0.579	0.0251626	-2.45709	-3.2783	-0.424296	INTS3	integrator complex subunit 3
218616_at	0.601	0.0367545	2.26838	-3.5659	0.249525	INTS12	integrator complex subunit 12
237504_at	0.547	0.0116886	2.82759	-2.6911	0.319371	INTS10	integrator complex subunit 10
226212_s_at	0.558	0.0181021	2.61779	-3.0267	0.46948	INSR	insulin receptor
240841_at	0.578	0.0229225	-2.50287	-3.2072	-0.218419	INSM2	INSM transcriptional repressor 2
201627_s_at	0.515	0.00834948	2.98678	-2.4326	0.702048	INSIG1	insulin induced gene 1
204552_at	0.558	0.017397	2.63701	-2.9962	0.289849	INPP4A	inositol polyphosphate-4-phosphatase type I A
224061_at	0.519	0.00868344	-2.9683	-2.4628	-0.645669	INMT	indolethylamine N-methyltransferase
231863_at	0.586	0.029945	2.371	-3.4107	0.319816	ING3	inhibitor of growth family member 3
218516_s_at	0.557	0.0148477	2.7133	-2.8748	0.323736	IMPAD1	inositol monophosphatase domain containing 1
229025_s_at	0.567	0.0201747	-2.56519	-3.1096	-0.33729	IMMP1L	inner mitochondrial membrane peptidase subunit 1
220322_at	0.557	0.0153625	-2.69693	-2.9009	-0.145947	IL36G	interleukin 36, gamma
206341_at	0.588	0.0313093	2.3488	-3.4445	0.222046	IL2RA	interleukin 2 receptor subunit alpha
216243_s_at	0.469	0.00225074	3.59718	-1.4284	1.38098	IL1RN	interleukin 1 receptor antagonist
215561_s_at	0.582	0.0270896	2.42069	-3.3345	0.612399	IL1R1	interleukin 1 receptor type 1
207072_at	0.519	0.008617	2.97192	-2.4569	0.808196	IL18RAP	interleukin 18 receptor accessory protein
227997_at	0.59	0.0322057	-2.33471	-3.4659	-0.195894	IL17RD	interleukin 17 receptor D
224156_x_at	0.58	0.0256436	-2.44776	-3.2927	-0.508031	IL17RB	interleukin 17 receptor B
207375_s_at	0.622	0.0488114	2.12375	-3.7794	0.523508	IL15RA	interleukin 15 receptor subunit alpha
205992_s_at	0.544	0.0114948	2.83554	-2.6783	0.433772	IL15	interleukin 15
211612_s_at	0.591	0.03303	2.32207	-3.4851	0.336848	IL13RA1	interleukin 13 receptor subunit alpha 1
1552646_at	0.614	0.0420687	-2.19994	-3.6678	-0.223027	IL11RA	interleukin 11 receptor subunit alpha
226761_at	0.522	0.00964322	-2.9188	-2.5433	-0.245902	IKZF4	IKAROS family zinc finger 4
202491_s_at	0.576	0.0225282	2.51136	-3.1939	0.644362	IKBKAP	inhibitor of kappa light polypeptide gene enhancer in B-cells, kinase complex-associated protein
227295_at	0.582	0.0273498	2.41596	-3.3417	0.359115	IKBIP	IKBKB interacting protein
223807_at	0.526	0.00984992	-2.90877	-2.5596	-0.218407	IGSF1	immunoglobulin superfamily member 1
216829_at	0.578	0.0231085	2.49891	-3.2133	0.122627	IGK///IGKC	immunoglobulin kappa locus///immunoglobulin kappa constant
231148_at	0.591	0.032462	-2.33075	-3.4719	-0.219925	IGFL2	IGF like family member 2
211959_at	0.389	0.00060968	-4.20242	-0.4438	-0.857927	IGFBP5	insulin like growth factor binding protein 5
202718_at	0.519	0.00874013	-2.96523	-2.4678	-1.56634	IGFBP2	insulin like growth factor binding protein 2
209540_at	0.5	0.00535525	-3.19488	-2.0915	-0.884762	IGF1	insulin like growth factor 1
240251_at	0.557	0.0158115	-2.68308	-2.923	-0.209082	IFT80	intraflagellar transport 80
218785_s_at	0.582	0.029034	-2.38635	-3.3872	-0.185789	IFT22	intraflagellar transport 22
226324_s_at	0.622	0.0489334	-2.12247	-3.7813	-0.190681	IFT172	intraflagellar transport 172
204792_s_at	0.59	0.0320165	-2.33765	-3.4614	-0.231087	IFT140	intraflagellar transport 140
201642_at	0.558	0.0174668	2.63507	-2.9993	0.550554	IFNGR2	interferon gamma receptor 2 (interferon gamma transducer 1)
211676_s_at	0.496	0.00349866	3.39287	-1.7652	1.25632	IFNGR1	interferon gamma receptor 1
227125_at	0.591	0.0326939	2.32719	-3.4773	0.542851	IFNAR2	interferon alpha and beta receptor subunit 2
214569_at	0.562	0.0187301	-2.60127	-3.0528	-0.139483	IFNA5	interferon alpha 5
214022_s_at	0.614	0.0427528	2.19172	-3.6799	0.505365	IFITM1	interferon induced transmembrane protein 1
204415_at	0.59	0.032023	2.33755	-3.4616	0.519559	IFI6	interferon alpha inducible protein 6
204439_at	0.575	0.0219936	2.5231	-3.1756	0.717085	IFI44L	interferon induced protein 44 like
202411_at	0.505	0.00660656	3.09673	-2.2527	0.639922	IFI27	interferon alpha inducible protein 27
208966_x_at	0.604	0.0375026	2.25822	-3.5811	0.791321	IFI16	interferon gamma inducible protein 16
225615_at	0.586	0.0298032	2.37336	-3.4071	0.535217	IFFO2	intermediate filament family orphan 2
226552_at	0.556	0.0136649	2.75307	-2.8111	0.644714	IER5L	immediate early response 5 like
218611_at	0.603	0.0371317	2.26323	-3.5736	0.777373	IER5	immediate early response 5
201631_s_at	0.618	0.0460158	2.15409	-3.7352	0.997738	IER3	immediate early response 3
239086_at	0.395	0.00080864	-4.07112	-0.6548	-0.791047	IDNK	IDNK, gluconokinase
209291_at	0.519	0.00892828	-2.95519	-2.4841	-0.759385	ID4	inhibitor of DNA binding 4, HLH protein
209654_at	0.609	0.0389338	2.23927	-3.6094	0.364482	ICE1	interactor of little elongation complex ELL subunit 1
202638_s_at	0.515	0.00836176	2.98609	-2.4338	1.67918	ICAM1	intercellular adhesion molecule 1
200825_s_at	0.526	0.00987225	-2.9077	-2.5614	-0.724029	HYOU1	hypoxia up-regulated 1
1553706_at	0.5	0.00453323	3.27252	-1.9636	0.181753	HTRA4	HtrA serine peptidase 4
226944_at	0.514	0.00791011	-3.01222	-2.3911	-0.219333	HTRA3	HtrA serine peptidase 3
221362_at	0.579	0.0248577	-2.46309	-3.269	-0.17702	HTR5A	5-hydroxytryptamine receptor 5A
207368_at	0.606	0.0381186	-2.24998	-3.5934	-0.154963	HTR1D	5-hydroxytryptamine receptor 1D
209448_at	0.553	0.0128071	-2.78405	-2.7613	-0.542202	HTATIP2	HIV-1 Tat interactive protein 2
201655_s_at	0.567	0.0200346	-2.56858	-3.1043	-0.21719	HSPG2	heparan sulfate proteoglycan 2
202918_s_at	0.587	0.0304063	2.36339	-3.4223	0.65693	HSPE1-MOB4///MOB4	HSPE1-MOB4 readthrough///MOB family member 4, phocein
201841_s_at	0.456	0.00205367	-3.63957	-1.3587	-0.674202	HSPB1	heat shock protein family B (small) member 1
200690_at	0.578	0.0236909	2.48671	-3.2323	0.263776	HSPA9	heat shock protein family A (Hsp70) member 9
[truncated: 1,153 more rows]
