# Supplementary material for: Combined Analysis of Expression Profiles in a Mouse Model and Patients Identified BHMT2 as a New Regulator of Lipid Metabolism in Metabolic-Associated Fatty Liver Disease
Source: Front Cell Dev Biol. 2021 Nov 11;9:741710. doi: 10.3389/fcell.2021.741710 (PMC8636031; doi:10.3389/fcell.2021.741710)
Supplement: Supplementary file 4 [file Table6.XLSX]

## Sheet: Enrichment
Table S6.Enrichment analysis of differential genes that removed overlapping genes in liver tissues of MAFLD patients
GroupID	Category	Term	Description	LogP	Log(q-value)	InTerm_InList	Genes	Symbols
1_Summary	GO Biological Processes	GO:0032787	monocarboxylic acid metabolic process	-13.4348	-9.08855	69/664	30,32,33,34,229,313,440,570,957,1549,1555,1559,1573,2027,2110,2168,2180,2184,2203,2264,2806,2938,3030,3032,3248,3417,3553,4199,4282,5164,5264,5563,5565,6652,6718,6720,6822,7915,8854,9023,9536,10062,22949,23175,23305,23498,23600,29104,54363,54575,54578,54659,55347,55526,55753,55825,56898,57678,63826,66002,79799,80221,84532,84696,91452,112817,116519,122970,221937,493,586,2247,2731,3161,3242,10840,1…	ACAA1,ACACB,ACADL,ACADM,ALDOB,AOAH,ASNS,BAAT,ENTPD5,CYP2A7,CYP2B6,CYP2C9,CYP2J2,ENO3,ETFDH,FABP1,ACSL1,FAH,FBP1,FGFR4,GOT2,GSTA1,HADHA,HADHB,HPGD,IDH1,IL1B,ME1,MIF,PDK2,PHYH,PRKAA2,PRKAB2,SORD,AKR1D1,SREBF1,SULT2A1,ALDH5A1,ALDH1A2,CH25H,PTGES,NR1H3,PTGR1,LPIN1,ACSL6,HAAO,AMACR,N6AMT1,HAO1,UGT1A10,UGT1A6,UGT1A3,ABHD10,DHTKD1,OGDHL,PECR,BDH2,GPAM,SRR,CYP4F12,UGT2A3,ACSF2,ACSS1,ABHD1,ACBD5,HOGA1,APO…
1_Member	GO Biological Processes	GO:0032787	monocarboxylic acid metabolic process	-13.4348	-9.08855	69/664	30,32,33,34,229,313,440,570,957,1549,1555,1559,1573,2027,2110,2168,2180,2184,2203,2264,2806,2938,3030,3032,3248,3417,3553,4199,4282,5164,5264,5563,5565,6652,6718,6720,6822,7915,8854,9023,9536,10062,22949,23175,23305,23498,23600,29104,54363,54575,54578,54659,55347,55526,55753,55825,56898,57678,63826,66002,79799,80221,84532,84696,91452,112817,116519,122970,221937	ACAA1,ACACB,ACADL,ACADM,ALDOB,AOAH,ASNS,BAAT,ENTPD5,CYP2A7,CYP2B6,CYP2C9,CYP2J2,ENO3,ETFDH,FABP1,ACSL1,FAH,FBP1,FGFR4,GOT2,GSTA1,HADHA,HADHB,HPGD,IDH1,IL1B,ME1,MIF,PDK2,PHYH,PRKAA2,PRKAB2,SORD,AKR1D1,SREBF1,SULT2A1,ALDH5A1,ALDH1A2,CH25H,PTGES,NR1H3,PTGR1,LPIN1,ACSL6,HAAO,AMACR,N6AMT1,HAO1,UGT1A10,UGT1A6,UGT1A3,ABHD10,DHTKD1,OGDHL,PECR,BDH2,GPAM,SRR,CYP4F12,UGT2A3,ACSF2,ACSS1,ABHD1,ACBD5,HOGA1,APO…
1_Member	GO Biological Processes	GO:0016054	organic acid catabolic process	-11.4854	-7.61623	39/283	30,32,33,34,493,586,2110,2168,2184,2247,2731,2806,3030,3032,3161,3242,3248,5264,6652,6718,6822,7915,10840,10894,23175,23498,23600,51449,54363,55347,55576,55825,56898,66002,80896,84696,91452,112817,122970	ACAA1,ACACB,ACADL,ACADM,ATP2B4,BCAT1,ETFDH,FABP1,FAH,FGF2,GLDC,GOT2,HADHA,HADHB,HMMR,HPD,HPGD,PHYH,SORD,AKR1D1,SULT2A1,ALDH5A1,ALDH1L1,LYVE1,LPIN1,HAAO,AMACR,PCYOX1,HAO1,ABHD10,STAB2,PECR,BDH2,CYP4F12,NPL,ABHD1,ACBD5,HOGA1,ACOT4
1_Member	GO Biological Processes	GO:0046395	carboxylic acid catabolic process	-11.4854	-7.61623	39/283	30,32,33,34,493,586,2110,2168,2184,2247,2731,2806,3030,3032,3161,3242,3248,5264,6652,6718,6822,7915,10840,10894,23175,23498,23600,51449,54363,55347,55576,55825,56898,66002,80896,84696,91452,112817,122970	ACAA1,ACACB,ACADL,ACADM,ATP2B4,BCAT1,ETFDH,FABP1,FAH,FGF2,GLDC,GOT2,HADHA,HADHB,HMMR,HPD,HPGD,PHYH,SORD,AKR1D1,SULT2A1,ALDH5A1,ALDH1L1,LYVE1,LPIN1,HAAO,AMACR,PCYOX1,HAO1,ABHD10,STAB2,PECR,BDH2,CYP4F12,NPL,ABHD1,ACBD5,HOGA1,ACOT4
1_Member	GO Biological Processes	GO:0044282	small molecule catabolic process	-10.7587	-7.01447	50/455	30,32,33,34,229,493,586,957,1890,2027,2110,2168,2184,2247,2592,2731,2806,3030,3032,3161,3242,3248,5264,6652,6718,6783,6822,7915,10380,10840,10894,23175,23498,23600,51449,51816,54363,55347,55576,55825,56898,57016,66002,80896,84696,91452,112817,122970,221937,377841	ACAA1,ACACB,ACADL,ACADM,ALDOB,ATP2B4,BCAT1,ENTPD5,TYMP,ENO3,ETFDH,FABP1,FAH,FGF2,GALT,GLDC,GOT2,HADHA,HADHB,HMMR,HPD,HPGD,PHYH,SORD,AKR1D1,SULT1E1,SULT2A1,ALDH5A1,BPNT1,ALDH1L1,LYVE1,LPIN1,HAAO,AMACR,PCYOX1,ADA2,HAO1,ABHD10,STAB2,PECR,BDH2,AKR1B10,CYP4F12,NPL,ABHD1,ACBD5,HOGA1,ACOT4,FOXK1,ENTPD8
1_Member	GO Biological Processes	GO:0072329	monocarboxylic acid catabolic process	-9.38751	-5.74022	24/138	30,32,33,34,2110,2168,2184,3030,3032,3248,5264,6652,6718,6822,7915,23175,23600,54363,55825,56898,66002,84696,91452,112817	ACAA1,ACACB,ACADL,ACADM,ETFDH,FABP1,FAH,HADHA,HADHB,HPGD,PHYH,SORD,AKR1D1,SULT2A1,ALDH5A1,LPIN1,AMACR,HAO1,PECR,BDH2,CYP4F12,ABHD1,ACBD5,HOGA1
1_Member	GO Biological Processes	GO:0006631	fatty acid metabolic process	-8.17685	-4.619	41/396	30,32,33,34,313,570,1549,1555,1559,1573,2110,2168,2180,2938,3030,3032,3248,3553,4282,5164,5264,5563,5565,6720,9536,10062,22949,23175,23305,23600,54363,55825,56898,57678,66002,80221,84532,84696,91452,116519,122970	ACAA1,ACACB,ACADL,ACADM,AOAH,BAAT,CYP2A7,CYP2B6,CYP2C9,CYP2J2,ETFDH,FABP1,ACSL1,GSTA1,HADHA,HADHB,HPGD,IL1B,MIF,PDK2,PHYH,PRKAA2,PRKAB2,SREBF1,PTGES,NR1H3,PTGR1,LPIN1,ACSL6,AMACR,HAO1,PECR,BDH2,GPAM,CYP4F12,ACSF2,ACSS1,ABHD1,ACBD5,APOA5,ACOT4
1_Member	GO Biological Processes	GO:0044242	cellular lipid catabolic process	-8.10795	-4.619	30/237	30,32,33,34,313,1373,2110,2167,2168,2760,3030,3032,3248,3417,4668,5264,6653,8877,23175,23600,54363,55825,56898,57016,57406,66002,84696,91452,116519,284161	ACAA1,ACACB,ACADL,ACADM,AOAH,CPS1,ETFDH,FABP4,FABP1,GM2A,HADHA,HADHB,HPGD,IDH1,NAGA,PHYH,SORL1,SPHK1,LPIN1,AMACR,HAO1,PECR,BDH2,AKR1B10,ABHD6,CYP4F12,ABHD1,ACBD5,APOA5,GDPD1
1_Member	GO Biological Processes	GO:0016042	lipid catabolic process	-7.91269	-4.52068	37/343	30,32,33,34,313,1373,2110,2167,2168,2760,3030,3032,3248,3417,3553,3988,4668,5264,5333,5920,6653,6718,6783,8877,23175,23491,23600,54363,55825,56898,57016,57406,66002,84696,91452,116519,284161	ACAA1,ACACB,ACADL,ACADM,AOAH,CPS1,ETFDH,FABP4,FABP1,GM2A,HADHA,HADHB,HPGD,IDH1,IL1B,LIPA,NAGA,PHYH,PLCD1,PLAAT4,SORL1,AKR1D1,SULT1E1,SPHK1,LPIN1,CES3,AMACR,HAO1,PECR,BDH2,AKR1B10,ABHD6,CYP4F12,ABHD1,ACBD5,APOA5,GDPD1
1_Member	Reactome Gene Sets	R-HSA-8978868	Fatty acid metabolism	-7.82154	-4.47528	25/177	30,32,33,34,788,1559,1573,2180,3030,3032,3248,3293,5264,5563,5565,6576,9536,22949,23305,23600,55825,64180,80221,91452,122970	ACAA1,ACACB,ACADL,ACADM,SLC25A20,CYP2C9,CYP2J2,ACSL1,HADHA,HADHB,HPGD,HSD17B3,PHYH,PRKAA2,PRKAB2,SLC25A1,PTGES,PTGR1,ACSL6,AMACR,PECR,DPEP3,ACSF2,ACBD5,ACOT4
1_Member	Reactome Gene Sets	R-HSA-556833	Metabolism of lipids	-7.18159	-4.04415	59/739	30,32,33,34,123,231,375,570,788,1559,1573,2167,2168,2180,2222,2274,2760,3030,3032,3158,3248,3293,3631,4036,4199,5264,5563,5565,5920,6309,6554,6576,6713,6718,6720,6822,7108,8877,9023,9536,10062,10226,22949,23175,23305,23600,55090,55825,56898,57678,64180,80168,80221,83394,91452,116519,122970,284161,388121	ACAA1,ACACB,ACADL,ACADM,PLIN2,AKR1B1,ARF1,BAAT,SLC25A20,CYP2C9,CYP2J2,FABP4,FABP1,ACSL1,FDFT1,FHL2,GM2A,HADHA,HADHB,HMGCS2,HPGD,HSD17B3,INPP4A,LRP2,ME1,PHYH,PRKAA2,PRKAB2,PLAAT4,SC5D,SLC10A1,SLC25A1,SQLE,AKR1D1,SREBF1,SULT2A1,TM7SF2,SPHK1,CH25H,PTGES,NR1H3,PLIN3,PTGR1,LPIN1,ACSL6,AMACR,MED9,PECR,BDH2,GPAM,DPEP3,MOGAT2,ACSF2,PITPNM3,ACBD5,APOA5,ACOT4,GDPD1,TNFAIP8L3
1_Member	GO Biological Processes	GO:0009062	fatty acid catabolic process	-6.54752	-3.50541	18/114	30,32,33,34,2110,2168,3030,3032,3248,5264,23175,23600,54363,55825,56898,66002,84696,91452	ACAA1,ACACB,ACADL,ACADM,ETFDH,FABP1,HADHA,HADHB,HPGD,PHYH,LPIN1,AMACR,HAO1,PECR,BDH2,CYP4F12,ABHD1,ACBD5
1_Member	GO Biological Processes	GO:0019395	fatty acid oxidation	-3.73233	-1.31726	13/106	30,32,33,34,2110,2168,3030,3032,5264,23600,54363,55825,56898	ACAA1,ACACB,ACADL,ACADM,ETFDH,FABP1,HADHA,HADHB,PHYH,AMACR,HAO1,PECR,BDH2
1_Member	GO Biological Processes	GO:0034440	lipid oxidation	-3.53177	-1.2642	13/111	30,32,33,34,2110,2168,3030,3032,5264,23600,54363,55825,56898	ACAA1,ACACB,ACADL,ACADM,ETFDH,FABP1,HADHA,HADHB,PHYH,AMACR,HAO1,PECR,BDH2
1_Member	GO Biological Processes	GO:0006635	fatty acid beta-oxidation	-3.33773	-1.11636	10/74	30,32,33,34,2110,2168,3030,3032,23600,56898	ACAA1,ACACB,ACADL,ACADM,ETFDH,FABP1,HADHA,HADHB,AMACR,BDH2
1_Member	GO Biological Processes	GO:0030258	lipid modification	-2.44397	-0.608256	20/271	28,30,32,33,34,1154,2110,2168,3030,3032,5264,8651,8877,10380,23600,54363,55825,56898,116519,619373	ABO,ACAA1,ACACB,ACADL,ACADM,CISH,ETFDH,FABP1,HADHA,HADHB,PHYH,SOCS1,SPHK1,BPNT1,AMACR,HAO1,PECR,BDH2,APOA5,MBOAT4
2_Summary	GO Biological Processes	GO:0019216	regulation of lipid metabolic process	-8.06217	-4.619	43/431	32,33,34,123,133,375,1154,1917,2168,2180,2222,2247,2261,2264,2274,3158,3248,3417,3553,4199,5164,5563,5565,6309,6653,6713,6720,6822,7010,7108,7784,8651,8877,10062,10451,53345,57406,57678,64805,116519,150094,221395,388121,229,440,493,570,586,957,1373,1559,1719,2027,2203,2356,2806,4282,5723,6718,8854,9023,9536,10057,23498,23600,55526,55753,55825,63826,65263,84532,84696,112817,122970,221937,231,3293,…	ACACB,ACADL,ACADM,PLIN2,ADM,ARF1,CISH,EEF1A2,FABP1,ACSL1,FDFT1,FGF2,FGFR3,FGFR4,FHL2,HMGCS2,HPGD,IDH1,IL1B,ME1,PDK2,PRKAA2,PRKAB2,SC5D,SORL1,SQLE,SREBF1,SULT2A1,TEK,TM7SF2,ZP3,SOCS1,SPHK1,NR1H3,VAV3,TM6SF2,ABHD6,GPAM,P2RY12,APOA5,SIK1,ADGRF5,TNFAIP8L3,ALDOB,ASNS,ATP2B4,BAAT,BCAT1,ENTPD5,CPS1,CYP2C9,DHFR,ENO3,FBP1,FPGS,GOT2,MIF,PSPH,AKR1D1,ALDH1A2,CH25H,PTGES,ABCC5,HAAO,AMACR,DHTKD1,OGDHL,PECR,SRR…
2_Member	GO Biological Processes	GO:0019216	regulation of lipid metabolic process	-8.06217	-4.619	43/431	32,33,34,123,133,375,1154,1917,2168,2180,2222,2247,2261,2264,2274,3158,3248,3417,3553,4199,5164,5563,5565,6309,6653,6713,6720,6822,7010,7108,7784,8651,8877,10062,10451,53345,57406,57678,64805,116519,150094,221395,388121	ACACB,ACADL,ACADM,PLIN2,ADM,ARF1,CISH,EEF1A2,FABP1,ACSL1,FDFT1,FGF2,FGFR3,FGFR4,FHL2,HMGCS2,HPGD,IDH1,IL1B,ME1,PDK2,PRKAA2,PRKAB2,SC5D,SORL1,SQLE,SREBF1,SULT2A1,TEK,TM7SF2,ZP3,SOCS1,SPHK1,NR1H3,VAV3,TM6SF2,ABHD6,GPAM,P2RY12,APOA5,SIK1,ADGRF5,TNFAIP8L3
2_Member	GO Biological Processes	GO:0046394	carboxylic acid biosynthetic process	-5.99854	-3.05023	41/476	32,33,229,440,493,570,586,957,1373,1559,1719,2027,2203,2264,2356,2806,3248,3553,4282,5563,5565,5723,6718,8854,9023,9536,10057,10062,23498,23600,55526,55753,55825,63826,65263,84532,84696,112817,116519,122970,221937	ACACB,ACADL,ALDOB,ASNS,ATP2B4,BAAT,BCAT1,ENTPD5,CPS1,CYP2C9,DHFR,ENO3,FBP1,FGFR4,FPGS,GOT2,HPGD,IL1B,MIF,PRKAA2,PRKAB2,PSPH,AKR1D1,ALDH1A2,CH25H,PTGES,ABCC5,NR1H3,HAAO,AMACR,DHTKD1,OGDHL,PECR,SRR,PYCR3,ACSS1,ABHD1,HOGA1,APOA5,ACOT4,FOXK1
2_Member	GO Biological Processes	GO:0016053	organic acid biosynthetic process	-5.97524	-3.04396	41/477	32,33,229,440,493,570,586,957,1373,1559,1719,2027,2203,2264,2356,2806,3248,3553,4282,5563,5565,5723,6718,8854,9023,9536,10057,10062,23498,23600,55526,55753,55825,63826,65263,84532,84696,112817,116519,122970,221937	ACACB,ACADL,ALDOB,ASNS,ATP2B4,BAAT,BCAT1,ENTPD5,CPS1,CYP2C9,DHFR,ENO3,FBP1,FGFR4,FPGS,GOT2,HPGD,IL1B,MIF,PRKAA2,PRKAB2,PSPH,AKR1D1,ALDH1A2,CH25H,PTGES,ABCC5,NR1H3,HAAO,AMACR,DHTKD1,OGDHL,PECR,SRR,PYCR3,ACSS1,ABHD1,HOGA1,APOA5,ACOT4,FOXK1
2_Member	GO Biological Processes	GO:0072330	monocarboxylic acid biosynthetic process	-4.85639	-2.06917	31/353	32,33,229,440,570,957,1559,2027,2203,2264,3248,3553,4282,5563,5565,6718,8854,9023,9536,10062,23600,55526,55753,55825,63826,84532,84696,112817,116519,122970,221937	ACACB,ACADL,ALDOB,ASNS,BAAT,ENTPD5,CYP2C9,ENO3,FBP1,FGFR4,HPGD,IL1B,MIF,PRKAA2,PRKAB2,AKR1D1,ALDH1A2,CH25H,PTGES,NR1H3,AMACR,DHTKD1,OGDHL,PECR,SRR,ACSS1,ABHD1,HOGA1,APOA5,ACOT4,FOXK1
2_Member	GO Biological Processes	GO:0046890	regulation of lipid biosynthetic process	-4.37464	-1.71858	21/207	32,33,133,2222,2264,3417,3553,5563,5565,6309,6713,6720,7108,7784,8877,10062,57406,57678,116519,150094,221395	ACACB,ACADL,ADM,FDFT1,FGFR4,IDH1,IL1B,PRKAA2,PRKAB2,SC5D,SQLE,SREBF1,TM7SF2,ZP3,SPHK1,NR1H3,ABHD6,GPAM,APOA5,SIK1,ADGRF5
2_Member	GO Biological Processes	GO:0008610	lipid biosynthetic process	-4.31224	-1.71418	50/733	32,33,133,231,375,570,1559,2180,2222,2247,2264,3158,3248,3293,3417,3553,3631,4282,5277,5563,5565,6309,6713,6718,6720,7108,7784,8854,8877,9023,9536,10062,23175,23305,23556,23600,55825,57406,57678,64090,80168,81849,83394,84302,84532,84696,116519,122970,150094,221395	ACACB,ACADL,ADM,AKR1B1,ARF1,BAAT,CYP2C9,ACSL1,FDFT1,FGF2,FGFR4,HMGCS2,HPGD,HSD17B3,IDH1,IL1B,INPP4A,MIF,PIGA,PRKAA2,PRKAB2,SC5D,SQLE,AKR1D1,SREBF1,TM7SF2,ZP3,ALDH1A2,SPHK1,CH25H,PTGES,NR1H3,LPIN1,ACSL6,PIGN,AMACR,PECR,ABHD6,GPAM,GAL3ST2,MOGAT2,ST6GALNAC5,PITPNM3,PGAP4,ACSS1,ABHD1,APOA5,ACOT4,SIK1,ADGRF5
2_Member	GO Biological Processes	GO:0042180	cellular ketone metabolic process	-4.23975	-1.67164	24/260	32,33,133,231,493,1555,2168,2264,2806,3248,3293,3553,4953,5164,5563,5565,6720,9056,10062,29914,51686,57016,66002,116519	ACACB,ACADL,ADM,AKR1B1,ATP2B4,CYP2B6,FABP1,FGFR4,GOT2,HPGD,HSD17B3,IL1B,ODC1,PDK2,PRKAA2,PRKAB2,SREBF1,SLC7A7,NR1H3,UBIAD1,OAZ3,AKR1B10,CYP4F12,APOA5
2_Member	GO Biological Processes	GO:0062012	regulation of small molecule metabolic process	-3.3985	-1.15738	34/481	32,33,133,493,957,2168,2203,2222,2264,2981,3248,3553,4199,4953,5164,5366,5563,5565,6309,6713,6720,7108,7262,9056,10062,23178,51686,54209,57678,90007,116519,150094,171425,221937	ACACB,ACADL,ADM,ATP2B4,ENTPD5,FABP1,FBP1,FDFT1,FGFR4,GUCA2B,HPGD,IL1B,ME1,ODC1,PDK2,PMAIP1,PRKAA2,PRKAB2,SC5D,SQLE,SREBF1,TM7SF2,PHLDA2,SLC7A7,NR1H3,PASK,OAZ3,TREM2,GPAM,MIDN,APOA5,SIK1,CLYBL,FOXK1
2_Member	GO Biological Processes	GO:0010565	regulation of cellular ketone metabolic process	-3.05392	-0.960518	17/189	32,33,133,493,2168,2264,3248,3553,4953,5164,5563,5565,6720,9056,10062,51686,116519	ACACB,ACADL,ADM,ATP2B4,FABP1,FGFR4,HPGD,IL1B,ODC1,PDK2,PRKAA2,PRKAB2,SREBF1,SLC7A7,NR1H3,OAZ3,APOA5
2_Member	GO Biological Processes	GO:0019217	regulation of fatty acid metabolic process	-2.81404	-0.81689	11/101	32,33,2168,3248,3553,5164,5563,5565,6720,10062,116519	ACACB,ACADL,FABP1,HPGD,IL1B,PDK2,PRKAA2,PRKAB2,SREBF1,NR1H3,APOA5
2_Member	GO Biological Processes	GO:0006633	fatty acid biosynthetic process	-2.60644	-0.697937	15/173	32,33,1559,3248,3553,4282,5563,5565,9536,10062,55825,84532,84696,116519,122970	ACACB,ACADL,CYP2C9,HPGD,IL1B,MIF,PRKAA2,PRKAB2,PTGES,NR1H3,PECR,ACSS1,ABHD1,APOA5,ACOT4
3_Summary	GO Biological Processes	GO:1901615	organic hydroxy compound metabolic process	-7.76929	-4.46443	50/556	30,32,33,231,570,847,1559,1621,1719,1735,2184,2222,2247,2264,3158,3293,3553,3631,3988,4036,4435,4929,5333,5563,5959,6309,6652,6713,6718,6720,6783,6822,7108,8854,8877,9023,9693,10380,23600,54363,55825,57016,57678,66002,80168,84532,116519,147015,284161,389434,133,1555,2538,6554	ACAA1,ACACB,ACADL,AKR1B1,BAAT,CAT,CYP2C9,DBH,DHFR,DIO3,FAH,FDFT1,FGF2,FGFR4,HMGCS2,HSD17B3,IL1B,INPP4A,LIPA,LRP2,CITED1,NR4A2,PLCD1,PRKAA2,RDH5,SC5D,SORD,SQLE,AKR1D1,SREBF1,SULT1E1,SULT2A1,TM7SF2,ALDH1A2,SPHK1,CH25H,RAPGEF2,BPNT1,AMACR,HAO1,PECR,AKR1B10,GPAM,CYP4F12,MOGAT2,ACSS1,APOA5,DHRS13,GDPD1,IYD,ADM,CYP2B6,G6PC,SLC10A1
3_Member	GO Biological Processes	GO:1901615	organic hydroxy compound metabolic process	-7.76929	-4.46443	50/556	30,32,33,231,570,847,1559,1621,1719,1735,2184,2222,2247,2264,3158,3293,3553,3631,3988,4036,4435,4929,5333,5563,5959,6309,6652,6713,6718,6720,6783,6822,7108,8854,8877,9023,9693,10380,23600,54363,55825,57016,57678,66002,80168,84532,116519,147015,284161,389434	ACAA1,ACACB,ACADL,AKR1B1,BAAT,CAT,CYP2C9,DBH,DHFR,DIO3,FAH,FDFT1,FGF2,FGFR4,HMGCS2,HSD17B3,IL1B,INPP4A,LIPA,LRP2,CITED1,NR4A2,PLCD1,PRKAA2,RDH5,SC5D,SORD,SQLE,AKR1D1,SREBF1,SULT1E1,SULT2A1,TM7SF2,ALDH1A2,SPHK1,CH25H,RAPGEF2,BPNT1,AMACR,HAO1,PECR,AKR1B10,GPAM,CYP4F12,MOGAT2,ACSS1,APOA5,DHRS13,GDPD1,IYD
3_Member	GO Biological Processes	GO:0006066	alcohol metabolic process	-6.33466	-3.33083	36/379	32,33,231,847,1559,1621,1719,2222,2247,3158,3553,3631,5333,5563,5959,6309,6652,6713,6718,6720,6783,6822,7108,8854,8877,9023,10380,54363,55825,57016,57678,80168,84532,116519,147015,284161	ACACB,ACADL,AKR1B1,CAT,CYP2C9,DBH,DHFR,FDFT1,FGF2,HMGCS2,IL1B,INPP4A,PLCD1,PRKAA2,RDH5,SC5D,SORD,SQLE,AKR1D1,SREBF1,SULT1E1,SULT2A1,TM7SF2,ALDH1A2,SPHK1,CH25H,BPNT1,HAO1,PECR,AKR1B10,GPAM,MOGAT2,ACSS1,APOA5,DHRS13,GDPD1
3_Member	GO Biological Processes	GO:0008202	steroid metabolic process	-4.95902	-2.14424	30/332	30,32,33,133,231,570,847,1555,1559,2222,2264,2538,3158,3293,3553,3988,4036,5563,5959,6309,6713,6718,6720,6783,6822,7108,9023,23600,57678,116519	ACAA1,ACACB,ACADL,ADM,AKR1B1,BAAT,CAT,CYP2B6,CYP2C9,FDFT1,FGFR4,G6PC,HMGCS2,HSD17B3,IL1B,LIPA,LRP2,PRKAA2,RDH5,SC5D,SQLE,AKR1D1,SREBF1,SULT1E1,SULT2A1,TM7SF2,CH25H,AMACR,GPAM,APOA5
3_Member	GO Biological Processes	GO:1901617	organic hydroxy compound biosynthetic process	-4.60228	-1.87383	25/263	32,231,570,1621,1719,2222,2247,2264,3158,3293,3553,4435,4929,5563,6309,6713,6718,6720,7108,8877,9023,9693,23600,57678,116519	ACACB,AKR1B1,BAAT,DBH,DHFR,FDFT1,FGF2,FGFR4,HMGCS2,HSD17B3,IL1B,CITED1,NR4A2,PRKAA2,SC5D,SQLE,AKR1D1,SREBF1,TM7SF2,SPHK1,CH25H,RAPGEF2,AMACR,GPAM,APOA5
3_Member	GO Biological Processes	GO:0006694	steroid biosynthetic process	-3.69981	-1.3126	19/198	32,133,231,570,2222,2264,3158,3293,3553,5563,6309,6713,6718,6720,7108,9023,23600,57678,116519	ACACB,ADM,AKR1B1,BAAT,FDFT1,FGFR4,HMGCS2,HSD17B3,IL1B,PRKAA2,SC5D,SQLE,AKR1D1,SREBF1,TM7SF2,CH25H,AMACR,GPAM,APOA5
3_Member	GO Biological Processes	GO:0016126	sterol biosynthetic process	-3.58717	-1.28623	11/82	32,2222,3158,5563,6309,6713,6720,7108,9023,57678,116519	ACACB,FDFT1,HMGCS2,PRKAA2,SC5D,SQLE,SREBF1,TM7SF2,CH25H,GPAM,APOA5
3_Member	GO Biological Processes	GO:0046165	alcohol biosynthetic process	-3.28873	-1.09382	16/164	32,231,1621,1719,2222,2247,3158,3553,5563,6309,6713,6720,7108,8877,57678,116519	ACACB,AKR1B1,DBH,DHFR,FDFT1,FGF2,HMGCS2,IL1B,PRKAA2,SC5D,SQLE,SREBF1,TM7SF2,SPHK1,GPAM,APOA5
3_Member	GO Biological Processes	GO:0006695	cholesterol biosynthetic process	-3.2438	-1.08101	10/76	32,2222,3158,5563,6309,6713,6720,7108,57678,116519	ACACB,FDFT1,HMGCS2,PRKAA2,SC5D,SQLE,SREBF1,TM7SF2,GPAM,APOA5
3_Member	GO Biological Processes	GO:1902653	secondary alcohol biosynthetic process	-3.2438	-1.08101	10/76	32,2222,3158,5563,6309,6713,6720,7108,57678,116519	ACACB,FDFT1,HMGCS2,PRKAA2,SC5D,SQLE,SREBF1,TM7SF2,GPAM,APOA5
3_Member	Reactome Gene Sets	R-HSA-8957322	Metabolism of steroids	-3.20132	-1.05373	15/151	32,231,570,2222,3293,4036,6309,6554,6713,6718,6720,7108,9023,23600,57678	ACACB,AKR1B1,BAAT,FDFT1,HSD17B3,LRP2,SC5D,SLC10A1,SQLE,AKR1D1,SREBF1,TM7SF2,CH25H,AMACR,GPAM
3_Member	KEGG Pathway	ko00100	Steroid biosynthesis	-3.1307	-1.00455	5/20	2222,3988,6309,6713,7108	FDFT1,LIPA,SC5D,SQLE,TM7SF2
3_Member	GO Biological Processes	GO:0016125	sterol metabolic process	-3.11818	-0.994642	16/170	32,33,847,1559,2222,3158,3988,5563,6309,6713,6718,6720,7108,9023,57678,116519	ACACB,ACADL,CAT,CYP2C9,FDFT1,HMGCS2,LIPA,PRKAA2,SC5D,SQLE,AKR1D1,SREBF1,TM7SF2,CH25H,GPAM,APOA5
3_Member	GO Biological Processes	GO:0008203	cholesterol metabolic process	-3.11226	-0.991316	15/154	32,33,847,1559,2222,3158,5563,6309,6713,6718,6720,7108,9023,57678,116519	ACACB,ACADL,CAT,CYP2C9,FDFT1,HMGCS2,PRKAA2,SC5D,SQLE,AKR1D1,SREBF1,TM7SF2,CH25H,GPAM,APOA5
3_Member	Reactome Gene Sets	R-HSA-2426168	Activation of gene expression by SREBF (SREBP)	-3.03603	-0.947452	7/42	32,2222,6309,6713,6720,7108,57678	ACACB,FDFT1,SC5D,SQLE,SREBF1,TM7SF2,GPAM
3_Member	GO Biological Processes	GO:1902652	secondary alcohol metabolic process	-3.02589	-0.939704	15/157	32,33,847,1559,2222,3158,5563,6309,6713,6718,6720,7108,9023,57678,116519	ACACB,ACADL,CAT,CYP2C9,FDFT1,HMGCS2,PRKAA2,SC5D,SQLE,AKR1D1,SREBF1,TM7SF2,CH25H,GPAM,APOA5
3_Member	KEGG Pathway	hsa00100	Steroid biosynthesis	-2.66391	-0.740899	5/25	2222,3988,6309,6713,7108	FDFT1,LIPA,SC5D,SQLE,TM7SF2
3_Member	GO Biological Processes	GO:0045540	regulation of cholesterol biosynthetic process	-2.53117	-0.669161	7/51	32,2222,6309,6713,6720,7108,57678	ACACB,FDFT1,SC5D,SQLE,SREBF1,TM7SF2,GPAM
3_Member	GO Biological Processes	GO:0106118	regulation of sterol biosynthetic process	-2.53117	-0.669161	7/51	32,2222,6309,6713,6720,7108,57678	ACACB,FDFT1,SC5D,SQLE,SREBF1,TM7SF2,GPAM
3_Member	GO Biological Processes	GO:0090181	regulation of cholesterol metabolic process	-2.47332	-0.629496	8/66	32,33,2222,6309,6713,6720,7108,57678	ACACB,ACADL,FDFT1,SC5D,SQLE,SREBF1,TM7SF2,GPAM
3_Member	GO Biological Processes	GO:0019218	regulation of steroid metabolic process	-2.38282	-0.580636	12/131	32,33,133,2222,2264,3553,6309,6713,6720,7108,57678,116519	ACACB,ACADL,ADM,FDFT1,FGFR4,IL1B,SC5D,SQLE,SREBF1,TM7SF2,GPAM,APOA5
3_Member	GO Biological Processes	GO:0050810	regulation of steroid biosynthetic process	-2.36849	-0.571238	10/99	32,133,2222,2264,3553,6309,6713,6720,7108,57678	ACACB,ADM,FDFT1,FGFR4,IL1B,SC5D,SQLE,SREBF1,TM7SF2,GPAM
3_Member	Reactome Gene Sets	R-HSA-1655829	Regulation of cholesterol biosynthesis by SREBP (SREBF)	-2.34396	-0.557615	7/55	32,2222,6309,6713,6720,7108,57678	ACACB,FDFT1,SC5D,SQLE,SREBF1,TM7SF2,GPAM
4_Summary	GO Biological Processes	GO:0010273	detoxification of copper ion	-7.68297	-4.45066	8/15	4489,4490,4493,4495,4499,4501,4502,326343,84329,1373,23498,57817,55532,148867,331,375,1318,4609,56898,81894,847,6652,231,493,890,1393,1719,1917,2167,2168,2203,2281,2521,3778,3791,5563,6648,7057,8877,9456,9536,27094,80149,85365,120892,140885,54822,133,148,858,1193,2149,2151,2247,2907,2969,5729,5739,6358,6368,7224,10590,23428,54923,57007,63892,66002,162514,2264,5164,6549	MT1A,MT1B,MT1E,MT1G,MT1M,MT1X,MT2A,MT1DP,HVCN1,CPS1,HAAO,HAMP,SLC30A10,SLC30A7,XIAP,ARF1,SLC31A2,MYC,BDH2,SLC25A28,CAT,SORD,AKR1B1,ATP2B4,CCNA2,CRHBP,DHFR,EEF1A2,FABP4,FABP1,FBP1,FKBP1B,FUS,KCNMA1,KDR,PRKAA2,SOD2,THBS1,SPHK1,HOMER1,PTGES,KCNMB3,ZC3H12A,ALG2,LRRK2,SIRPA,TRPM7,ADM,ADRA1A,CAV2,CLIC2,F2R,F2RL2,FGF2,GRINA,GTF2I,PTGDR,PTGIR,CCL14,CCL23,TRPC5,SCGN,SLC7A8,LIME1,ACKR3,THADA,CYP4F12,TRPV3,…
4_Member	GO Biological Processes	GO:0010273	detoxification of copper ion	-7.68297	-4.45066	8/15	4489,4490,4493,4495,4499,4501,4502,326343	MT1A,MT1B,MT1E,MT1G,MT1M,MT1X,MT2A,MT1DP
4_Member	GO Biological Processes	GO:1990169	stress response to copper ion	-7.68297	-4.45066	8/15	4489,4490,4493,4495,4499,4501,4502,326343	MT1A,MT1B,MT1E,MT1G,MT1M,MT1X,MT2A,MT1DP
4_Member	Reactome Gene Sets	R-HSA-5661231	Metallothioneins bind metals	-7.50302	-4.33286	7/11	4489,4490,4493,4495,4499,4501,4502	MT1A,MT1B,MT1E,MT1G,MT1M,MT1X,MT2A
4_Member	GO Biological Processes	GO:0061687	detoxification of inorganic compound	-7.13513	-4.04415	8/17	4489,4490,4493,4495,4499,4501,4502,326343	MT1A,MT1B,MT1E,MT1G,MT1M,MT1X,MT2A,MT1DP
4_Member	GO Biological Processes	GO:0097501	stress response to metal ion	-7.13513	-4.04415	8/17	4489,4490,4493,4495,4499,4501,4502,326343	MT1A,MT1B,MT1E,MT1G,MT1M,MT1X,MT2A,MT1DP
4_Member	GO Biological Processes	GO:0071294	cellular response to zinc ion	-6.92058	-3.85308	9/24	4489,4490,4493,4495,4499,4501,4502,84329,326343	MT1A,MT1B,MT1E,MT1G,MT1M,MT1X,MT2A,HVCN1,MT1DP
4_Member	Reactome Gene Sets	R-HSA-5660526	Response to metal ions	-6.52945	-3.50541	7/14	4489,4490,4493,4495,4499,4501,4502	MT1A,MT1B,MT1E,MT1G,MT1M,MT1X,MT2A
4_Member	GO Biological Processes	GO:0010043	response to zinc ion	-6.19541	-3.21089	12/54	1373,4489,4490,4493,4495,4499,4501,4502,23498,57817,84329,326343	CPS1,MT1A,MT1B,MT1E,MT1G,MT1M,MT1X,MT2A,HAAO,HAMP,HVCN1,MT1DP
4_Member	GO Biological Processes	GO:0006882	cellular zinc ion homeostasis	-6.1026	-3.13656	10/37	4489,4490,4493,4495,4499,4501,4502,55532,148867,326343	MT1A,MT1B,MT1E,MT1G,MT1M,MT1X,MT2A,SLC30A10,SLC30A7,MT1DP
4_Member	GO Biological Processes	GO:0055069	zinc ion homeostasis	-5.87119	-2.95629	10/39	4489,4490,4493,4495,4499,4501,4502,55532,148867,326343	MT1A,MT1B,MT1E,MT1G,MT1M,MT1X,MT2A,SLC30A10,SLC30A7,MT1DP
4_Member	GO Biological Processes	GO:0071280	cellular response to copper ion	-5.18965	-2.33499	8/28	4489,4490,4493,4495,4499,4501,4502,326343	MT1A,MT1B,MT1E,MT1G,MT1M,MT1X,MT2A,MT1DP
4_Member	GO Biological Processes	GO:0055076	transition metal ion homeostasis	-4.80458	-2.04939	17/136	331,375,1318,4489,4490,4493,4495,4499,4501,4502,4609,55532,56898,57817,81894,148867,326343	XIAP,ARF1,SLC31A2,MT1A,MT1B,MT1E,MT1G,MT1M,MT1X,MT2A,MYC,SLC30A10,BDH2,HAMP,SLC25A28,SLC30A7,MT1DP
4_Member	GO Biological Processes	GO:0046686	response to cadmium ion	-4.59333	-1.87383	11/64	847,4489,4490,4493,4495,4499,4501,4502,6652,23498,326343	CAT,MT1A,MT1B,MT1E,MT1G,MT1M,MT1X,MT2A,SORD,HAAO,MT1DP
4_Member	GO Biological Processes	GO:0046688	response to copper ion	-4.56687	-1.87383	9/43	4489,4490,4493,4495,4499,4501,4502,6652,326343	MT1A,MT1B,MT1E,MT1G,MT1M,MT1X,MT2A,SORD,MT1DP
4_Member	GO Biological Processes	GO:0071276	cellular response to cadmium ion	-4.13868	-1.5986	8/38	4489,4490,4493,4495,4499,4501,4502,326343	MT1A,MT1B,MT1E,MT1G,MT1M,MT1X,MT2A,MT1DP
4_Member	GO Biological Processes	GO:0046916	cellular transition metal ion homeostasis	-3.98045	-1.48545	14/114	375,1318,4489,4490,4493,4495,4499,4501,4502,4609,55532,57817,148867,326343	ARF1,SLC31A2,MT1A,MT1B,MT1E,MT1G,MT1M,MT1X,MT2A,MYC,SLC30A10,HAMP,SLC30A7,MT1DP
4_Member	GO Biological Processes	GO:0010035	response to inorganic substance	-3.55374	-1.2642	39/568	231,493,847,890,1373,1393,1719,1917,2167,2168,2203,2281,2521,3778,3791,4489,4490,4493,4495,4499,4501,4502,5563,6648,6652,7057,8877,9456,9536,23498,27094,55532,57817,80149,84329,85365,120892,140885,326343	AKR1B1,ATP2B4,CAT,CCNA2,CPS1,CRHBP,DHFR,EEF1A2,FABP4,FABP1,FBP1,FKBP1B,FUS,KCNMA1,KDR,MT1A,MT1B,MT1E,MT1G,MT1M,MT1X,MT2A,PRKAA2,SOD2,SORD,THBS1,SPHK1,HOMER1,PTGES,HAAO,KCNMB3,SLC30A10,HAMP,ZC3H12A,HVCN1,ALG2,LRRK2,SIRPA,MT1DP
4_Member	KEGG Pathway	ko04978	Mineral absorption	-3.21259	-1.05946	8/51	4489,4490,4493,4495,4499,4501,4502,54822	MT1A,MT1B,MT1E,MT1G,MT1M,MT1X,MT2A,TRPM7
4_Member	GO Biological Processes	GO:0055065	metal ion homeostasis	-3.14322	-1.00648	42/657	133,148,331,375,493,858,1193,1318,2149,2151,2247,2281,2907,2969,3778,4489,4490,4493,4495,4499,4501,4502,4609,5729,5739,6358,6368,7224,10590,23428,54822,54923,55532,56898,57007,57817,63892,66002,81894,148867,162514,326343	ADM,ADRA1A,XIAP,ARF1,ATP2B4,CAV2,CLIC2,SLC31A2,F2R,F2RL2,FGF2,FKBP1B,GRINA,GTF2I,KCNMA1,MT1A,MT1B,MT1E,MT1G,MT1M,MT1X,MT2A,MYC,PTGDR,PTGIR,CCL14,CCL23,TRPC5,SCGN,SLC7A8,TRPM7,LIME1,SLC30A10,BDH2,ACKR3,HAMP,THADA,CYP4F12,SLC25A28,SLC30A7,TRPV3,MT1DP
4_Member	KEGG Pathway	hsa04978	Mineral absorption	-3.09788	-0.979507	8/53	4489,4490,4493,4495,4499,4501,4502,54822	MT1A,MT1B,MT1E,MT1G,MT1M,MT1X,MT2A,TRPM7
4_Member	GO Biological Processes	GO:0010038	response to metal ion	-3.09362	-0.977814	27/366	847,1373,1393,2167,2203,2521,3778,4489,4490,4493,4495,4499,4501,4502,5563,6652,7057,9456,9536,23498,27094,55532,57817,84329,85365,120892,326343	CAT,CPS1,CRHBP,FABP4,FBP1,FUS,KCNMA1,MT1A,MT1B,MT1E,MT1G,MT1M,MT1X,MT2A,PRKAA2,SORD,THBS1,HOMER1,PTGES,HAAO,KCNMB3,SLC30A10,HAMP,HVCN1,ALG2,LRRK2,MT1DP
4_Member	GO Biological Processes	GO:0098771	inorganic ion homeostasis	-3.02137	-0.937566	46/749	133,148,331,375,493,858,1193,1318,2149,2151,2247,2264,2281,2907,2969,3778,4489,4490,4493,4495,4499,4501,4502,4609,5164,5729,5739,6358,6368,6549,7224,10590,23428,54822,54923,55532,56898,57007,57817,63892,66002,81894,120892,148867,162514,326343	ADM,ADRA1A,XIAP,ARF1,ATP2B4,CAV2,CLIC2,SLC31A2,F2R,F2RL2,FGF2,FGFR4,FKBP1B,GRINA,GTF2I,KCNMA1,MT1A,MT1B,MT1E,MT1G,MT1M,MT1X,MT2A,MYC,PDK2,PTGDR,PTGIR,CCL14,CCL23,SLC9A2,TRPC5,SCGN,SLC7A8,TRPM7,LIME1,SLC30A10,BDH2,ACKR3,HAMP,THADA,CYP4F12,SLC25A28,LRRK2,SLC30A7,TRPV3,MT1DP
4_Member	GO Biological Processes	GO:0055080	cation homeostasis	-2.89482	-0.856062	45/739	133,148,331,375,493,858,1193,1318,2149,2151,2247,2281,2907,2969,3778,4489,4490,4493,4495,4499,4501,4502,4609,5164,5729,5739,6358,6368,6549,7224,10590,23428,54822,54923,55532,56898,57007,57817,63892,66002,81894,120892,148867,162514,326343	ADM,ADRA1A,XIAP,ARF1,ATP2B4,CAV2,CLIC2,SLC31A2,F2R,F2RL2,FGF2,FKBP1B,GRINA,GTF2I,KCNMA1,MT1A,MT1B,MT1E,MT1G,MT1M,MT1X,MT2A,MYC,PDK2,PTGDR,PTGIR,CCL14,CCL23,SLC9A2,TRPC5,SCGN,SLC7A8,TRPM7,LIME1,SLC30A10,BDH2,ACKR3,HAMP,THADA,CYP4F12,SLC25A28,LRRK2,SLC30A7,TRPV3,MT1DP
4_Member	GO Biological Processes	GO:0006875	cellular metal ion homeostasis	-2.74636	-0.76981	37/586	133,148,375,493,858,1193,1318,2149,2151,2247,2281,2907,2969,3778,4489,4490,4493,4495,4499,4501,4502,4609,5729,5739,6358,6368,7224,10590,54822,54923,55532,57007,57817,63892,148867,162514,326343	ADM,ADRA1A,ARF1,ATP2B4,CAV2,CLIC2,SLC31A2,F2R,F2RL2,FGF2,FKBP1B,GRINA,GTF2I,KCNMA1,MT1A,MT1B,MT1E,MT1G,MT1M,MT1X,MT2A,MYC,PTGDR,PTGIR,CCL14,CCL23,TRPC5,SCGN,TRPM7,LIME1,SLC30A10,ACKR3,HAMP,THADA,SLC30A7,TRPV3,MT1DP
4_Member	GO Biological Processes	GO:0072503	cellular divalent inorganic cation homeostasis	-2.63525	-0.715508	32/493	133,148,493,858,1193,2149,2151,2247,2281,2907,2969,4489,4490,4493,4495,4499,4501,4502,5729,5739,6358,6368,7224,10590,54822,54923,55532,57007,63892,148867,162514,326343	ADM,ADRA1A,ATP2B4,CAV2,CLIC2,F2R,F2RL2,FGF2,FKBP1B,GRINA,GTF2I,MT1A,MT1B,MT1E,MT1G,MT1M,MT1X,MT2A,PTGDR,PTGIR,CCL14,CCL23,TRPC5,SCGN,TRPM7,LIME1,SLC30A10,ACKR3,THADA,SLC30A7,TRPV3,MT1DP
4_Member	GO Biological Processes	GO:0071248	cellular response to metal ion	-2.54579	-0.673749	16/193	1393,2167,2203,2521,4489,4490,4493,4495,4499,4501,4502,5563,55532,84329,120892,326343	CRHBP,FABP4,FBP1,FUS,MT1A,MT1B,MT1E,MT1G,MT1M,MT1X,MT2A,PRKAA2,SLC30A10,HVCN1,LRRK2,MT1DP
4_Member	GO Biological Processes	GO:0072507	divalent inorganic cation homeostasis	-2.38763	-0.5817	32/512	133,148,493,858,1193,2149,2151,2247,2281,2907,2969,4489,4490,4493,4495,4499,4501,4502,5729,5739,6358,6368,7224,10590,54822,54923,55532,57007,63892,148867,162514,326343	ADM,ADRA1A,ATP2B4,CAV2,CLIC2,F2R,F2RL2,FGF2,FKBP1B,GRINA,GTF2I,MT1A,MT1B,MT1E,MT1G,MT1M,MT1X,MT2A,PTGDR,PTGIR,CCL14,CCL23,TRPC5,SCGN,TRPM7,LIME1,SLC30A10,ACKR3,THADA,SLC30A7,TRPV3,MT1DP
4_Member	GO Biological Processes	GO:0071241	cellular response to inorganic substance	-2.33642	-0.552461	17/221	890,1393,2167,2203,2521,4489,4490,4493,4495,4499,4501,4502,5563,55532,84329,120892,326343	CCNA2,CRHBP,FABP4,FBP1,FUS,MT1A,MT1B,MT1E,MT1G,MT1M,MT1X,MT2A,PRKAA2,SLC30A10,HVCN1,LRRK2,MT1DP
4_Member	GO Biological Processes	GO:0030003	cellular cation homeostasis	-2.32327	-0.542865	39/664	133,148,375,493,858,1193,1318,2149,2151,2247,2281,2907,2969,3778,4489,4490,4493,4495,4499,4501,4502,4609,5729,5739,6358,6368,6549,7224,10590,54822,54923,55532,57007,57817,63892,120892,148867,162514,326343	ADM,ADRA1A,ARF1,ATP2B4,CAV2,CLIC2,SLC31A2,F2R,F2RL2,FGF2,FKBP1B,GRINA,GTF2I,KCNMA1,MT1A,MT1B,MT1E,MT1G,MT1M,MT1X,MT2A,MYC,PTGDR,PTGIR,CCL14,CCL23,SLC9A2,TRPC5,SCGN,TRPM7,LIME1,SLC30A10,ACKR3,HAMP,THADA,LRRK2,SLC30A7,TRPV3,MT1DP
4_Member	GO Biological Processes	GO:0006873	cellular ion homeostasis	-2.18764	-0.456781	39/677	133,148,375,493,858,1193,1318,2149,2151,2247,2281,2907,2969,3778,4489,4490,4493,4495,4499,4501,4502,4609,5729,5739,6358,6368,6549,7224,10590,54822,54923,55532,57007,57817,63892,120892,148867,162514,326343	ADM,ADRA1A,ARF1,ATP2B4,CAV2,CLIC2,SLC31A2,F2R,F2RL2,FGF2,FKBP1B,GRINA,GTF2I,KCNMA1,MT1A,MT1B,MT1E,MT1G,MT1M,MT1X,MT2A,MYC,PTGDR,PTGIR,CCL14,CCL23,SLC9A2,TRPC5,SCGN,TRPM7,LIME1,SLC30A10,ACKR3,HAMP,THADA,LRRK2,SLC30A7,TRPV3,MT1DP
5_Summary	GO Biological Processes	GO:0098754	detoxification	-7.52942	-4.33286	21/133	30,847,1193,1719,2168,2938,4489,4490,4493,4495,4499,4501,4502,6648,23530,29914,57016,84293,326343,389434,493869,440,1137,1373,1393,1621,2281,2538,2806,3248,3775,3778,3791,4929,5914,7298,8877,23428,57539,57817,80149,120892,140885	ACAA1,CAT,CLIC2,DHFR,FABP1,GSTA1,MT1A,MT1B,MT1E,MT1G,MT1M,MT1X,MT2A,SOD2,NNT,UBIAD1,AKR1B10,PRXL2A,MT1DP,IYD,GPX8,ASNS,CHRNA4,CPS1,CRHBP,DBH,FKBP1B,G6PC,GOT2,HPGD,KCNK1,KCNMA1,KDR,NR4A2,RARA,TYMS,SPHK1,SLC7A8,WDR35,HAMP,ZC3H12A,LRRK2,SIRPA
5_Member	GO Biological Processes	GO:0098754	detoxification	-7.52942	-4.33286	21/133	30,847,1193,1719,2168,2938,4489,4490,4493,4495,4499,4501,4502,6648,23530,29914,57016,84293,326343,389434,493869	ACAA1,CAT,CLIC2,DHFR,FABP1,GSTA1,MT1A,MT1B,MT1E,MT1G,MT1M,MT1X,MT2A,SOD2,NNT,UBIAD1,AKR1B10,PRXL2A,MT1DP,IYD,GPX8
5_Member	GO Biological Processes	GO:0009636	response to toxic substance	-5.7274	-2.82831	43/523	30,440,847,1137,1193,1373,1393,1621,1719,2168,2281,2538,2806,2938,3248,3775,3778,3791,4489,4490,4493,4495,4499,4501,4502,4929,5914,6648,7298,8877,23428,23530,29914,57016,57539,57817,80149,84293,120892,140885,326343,389434,493869	ACAA1,ASNS,CAT,CHRNA4,CLIC2,CPS1,CRHBP,DBH,DHFR,FABP1,FKBP1B,G6PC,GOT2,GSTA1,HPGD,KCNK1,KCNMA1,KDR,MT1A,MT1B,MT1E,MT1G,MT1M,MT1X,MT2A,NR4A2,RARA,SOD2,TYMS,SPHK1,SLC7A8,NNT,UBIAD1,AKR1B10,WDR35,HAMP,ZC3H12A,PRXL2A,LRRK2,SIRPA,MT1DP,IYD,GPX8
5_Member	GO Biological Processes	GO:1990748	cellular detoxification	-2.88967	-0.853042	12/114	847,1193,1719,2168,2938,6648,23530,29914,57016,84293,389434,493869	CAT,CLIC2,DHFR,FABP1,GSTA1,SOD2,NNT,UBIAD1,AKR1B10,PRXL2A,IYD,GPX8
5_Member	GO Biological Processes	GO:0098869	cellular oxidant detoxification	-2.745	-0.76981	11/103	847,1193,1719,2168,2938,6648,23530,29914,84293,389434,493869	CAT,CLIC2,DHFR,FABP1,GSTA1,SOD2,NNT,UBIAD1,PRXL2A,IYD,GPX8
6_Summary	GO Biological Processes	GO:0005975	carbohydrate metabolic process	-5.37686	-2.49301	48/631	28,32,229,231,313,950,957,2027,2203,2538,2592,2760,2806,2992,3417,4126,4199,4668,4886,5164,5260,5366,5373,5563,6513,6520,6576,6652,7262,10380,23178,54187,54575,54578,54659,55347,55526,55753,57818,79799,80168,80896,81849,83539,90007,150094,152831,221937,219855,3161,6383,6385,9956,10057,10855,10894,55576	ABO,ACACB,ALDOB,AKR1B1,AOAH,SCARB2,ENTPD5,ENO3,FBP1,G6PC,GALT,GM2A,GOT2,GYG1,IDH1,MANBA,ME1,NAGA,NPY1R,PDK2,PHKG1,PMAIP1,PMM2,PRKAA2,SLC2A1,SLC3A2,SLC25A1,SORD,PHLDA2,BPNT1,PASK,NANS,UGT1A10,UGT1A6,UGT1A3,ABHD10,DHTKD1,OGDHL,G6PC2,UGT2A3,MOGAT2,NPL,ST6GALNAC5,CHST9,MIDN,SIK1,KLB,FOXK1,SLC37A2,HMMR,SDC2,SDC4,HS3ST2,ABCC5,HPSE,LYVE1,STAB2
6_Member	GO Biological Processes	GO:0005975	carbohydrate metabolic process	-5.37686	-2.49301	48/631	28,32,229,231,313,950,957,2027,2203,2538,2592,2760,2806,2992,3417,4126,4199,4668,4886,5164,5260,5366,5373,5563,6513,6520,6576,6652,7262,10380,23178,54187,54575,54578,54659,55347,55526,55753,57818,79799,80168,80896,81849,83539,90007,150094,152831,221937	ABO,ACACB,ALDOB,AKR1B1,AOAH,SCARB2,ENTPD5,ENO3,FBP1,G6PC,GALT,GM2A,GOT2,GYG1,IDH1,MANBA,ME1,NAGA,NPY1R,PDK2,PHKG1,PMAIP1,PMM2,PRKAA2,SLC2A1,SLC3A2,SLC25A1,SORD,PHLDA2,BPNT1,PASK,NANS,UGT1A10,UGT1A6,UGT1A3,ABHD10,DHTKD1,OGDHL,G6PC2,UGT2A3,MOGAT2,NPL,ST6GALNAC5,CHST9,MIDN,SIK1,KLB,FOXK1
6_Member	Reactome Gene Sets	R-HSA-70263	Gluconeogenesis	-4.51073	-1.83657	8/34	229,2027,2203,2538,2806,6576,57818,219855	ALDOB,ENO3,FBP1,G6PC,GOT2,SLC25A1,G6PC2,SLC37A2
6_Member	GO Biological Processes	GO:0005996	monosaccharide metabolic process	-4.17709	-1.62016	26/296	32,229,231,2027,2203,2538,2592,2806,4886,5164,5366,5373,6513,6576,6652,7262,23178,54575,54578,54659,55347,57818,79799,90007,150094,221937	ACACB,ALDOB,AKR1B1,ENO3,FBP1,G6PC,GALT,GOT2,NPY1R,PDK2,PMAIP1,PMM2,SLC2A1,SLC25A1,SORD,PHLDA2,PASK,UGT1A10,UGT1A6,UGT1A3,ABHD10,G6PC2,UGT2A3,MIDN,SIK1,FOXK1
6_Member	Reactome Gene Sets	R-HSA-71387	Metabolism of carbohydrates	-3.79548	-1.35232	25/295	28,229,231,2027,2203,2538,2592,2806,2992,3161,4126,5260,6383,6385,6513,6576,6652,9956,10057,10855,10894,55576,57818,83539,219855	ABO,ALDOB,AKR1B1,ENO3,FBP1,G6PC,GALT,GOT2,GYG1,HMMR,MANBA,PHKG1,SDC2,SDC4,SLC2A1,SLC25A1,SORD,HS3ST2,ABCC5,HPSE,LYVE1,STAB2,G6PC2,CHST9,SLC37A2
6_Member	GO Biological Processes	GO:0019319	hexose biosynthetic process	-3.07252	-0.964311	11/94	229,231,2027,2203,2538,2806,5164,6576,6652,57818,150094	ALDOB,AKR1B1,ENO3,FBP1,G6PC,GOT2,PDK2,SLC25A1,SORD,G6PC2,SIK1
6_Member	GO Biological Processes	GO:0016051	carbohydrate biosynthetic process	-2.86363	-0.839593	18/214	229,231,2027,2203,2538,2806,2992,5164,5260,6513,6576,6652,23178,54187,57818,81849,83539,150094	ALDOB,AKR1B1,ENO3,FBP1,G6PC,GOT2,GYG1,PDK2,PHKG1,SLC2A1,SLC25A1,SORD,PASK,NANS,G6PC2,ST6GALNAC5,CHST9,SIK1
6_Member	GO Biological Processes	GO:0046364	monosaccharide biosynthetic process	-2.84933	-0.829412	11/100	229,231,2027,2203,2538,2806,5164,6576,6652,57818,150094	ALDOB,AKR1B1,ENO3,FBP1,G6PC,GOT2,PDK2,SLC25A1,SORD,G6PC2,SIK1
6_Member	GO Biological Processes	GO:0019318	hexose metabolic process	-2.76856	-0.785914	20/254	32,229,231,2027,2203,2538,2592,2806,4886,5164,5366,5373,6576,6652,7262,23178,57818,90007,150094,221937	ACACB,ALDOB,AKR1B1,ENO3,FBP1,G6PC,GALT,GOT2,NPY1R,PDK2,PMAIP1,PMM2,SLC25A1,SORD,PHLDA2,PASK,G6PC2,MIDN,SIK1,FOXK1
6_Member	GO Biological Processes	GO:0006006	glucose metabolic process	-2.47742	-0.632226	17/214	32,229,2027,2203,2538,2806,4886,5164,5366,6576,6652,7262,23178,57818,90007,150094,221937	ACACB,ALDOB,ENO3,FBP1,G6PC,GOT2,NPY1R,PDK2,PMAIP1,SLC25A1,SORD,PHLDA2,PASK,G6PC2,MIDN,SIK1,FOXK1
6_Member	GO Biological Processes	GO:0044262	cellular carbohydrate metabolic process	-2.35667	-0.563235	21/295	32,231,313,950,2203,2538,2992,3417,5164,5260,5366,6513,6652,7262,10380,23178,55347,80168,90007,150094,221937	ACACB,AKR1B1,AOAH,SCARB2,FBP1,G6PC,GYG1,IDH1,PDK2,PHKG1,PMAIP1,SLC2A1,SORD,PHLDA2,BPNT1,PASK,ABHD10,MOGAT2,MIDN,SIK1,FOXK1
6_Member	GO Biological Processes	GO:0006094	gluconeogenesis	-2.12389	-0.431812	9/91	229,2027,2203,2538,2806,5164,6576,57818,150094	ALDOB,ENO3,FBP1,G6PC,GOT2,PDK2,SLC25A1,G6PC2,SIK1
7_Summary	GO Biological Processes	GO:0051186	cofactor metabolic process	-5.21059	-2.34145	46/603	32,229,231,570,847,957,1719,2027,2180,2203,2356,2806,2938,2939,3158,3417,4199,4337,5164,5264,5563,6513,6576,7298,10135,10840,23098,23305,23498,23530,29914,53354,55526,55753,56898,57016,57678,66002,79944,80221,81693,84532,122970,171425,221937,554235,270,2981,4882,6241,7371,54209,377841,375,1373,2247,3631,5277,6652,7784,23175,23556,83394,84302,221395,5138,6783,6822,7498,9567,10380,27115,120892,28,1…	ACACB,ALDOB,AKR1B1,BAAT,CAT,ENTPD5,DHFR,ENO3,ACSL1,FBP1,FPGS,GOT2,GSTA1,GSTA2,HMGCS2,IDH1,ME1,MOCS1,PDK2,PHYH,PRKAA2,SLC2A1,SLC25A1,TYMS,NAMPT,ALDH1L1,SARM1,ACSL6,HAAO,NNT,UBIAD1,PANK1,DHTKD1,OGDHL,BDH2,AKR1B10,GPAM,CYP4F12,L2HGDH,ACSF2,AMN,ACSS1,ACOT4,CLYBL,FOXK1,ASPDH,AMPD1,GUCA2B,NPR2,RRM2,UCK2,TREM2,ENTPD8,ARF1,CPS1,FGF2,INPP4A,PIGA,SORD,ZP3,LPIN1,PIGN,PITPNM3,PGAP4,ADGRF5,PDE2A,SULT1E1,SULT2…
7_Member	GO Biological Processes	GO:0051186	cofactor metabolic process	-5.21059	-2.34145	46/603	32,229,231,570,847,957,1719,2027,2180,2203,2356,2806,2938,2939,3158,3417,4199,4337,5164,5264,5563,6513,6576,7298,10135,10840,23098,23305,23498,23530,29914,53354,55526,55753,56898,57016,57678,66002,79944,80221,81693,84532,122970,171425,221937,554235	ACACB,ALDOB,AKR1B1,BAAT,CAT,ENTPD5,DHFR,ENO3,ACSL1,FBP1,FPGS,GOT2,GSTA1,GSTA2,HMGCS2,IDH1,ME1,MOCS1,PDK2,PHYH,PRKAA2,SLC2A1,SLC25A1,TYMS,NAMPT,ALDH1L1,SARM1,ACSL6,HAAO,NNT,UBIAD1,PANK1,DHTKD1,OGDHL,BDH2,AKR1B10,GPAM,CYP4F12,L2HGDH,ACSF2,AMN,ACSS1,ACOT4,CLYBL,FOXK1,ASPDH
7_Member	GO Biological Processes	GO:0006732	coenzyme metabolic process	-5.1761	-2.33499	35/408	32,229,570,957,1719,2027,2180,2203,2356,3158,3417,4199,4337,5164,5563,6513,6576,7298,10135,10840,23098,23305,23498,23530,29914,53354,55526,55753,57678,66002,80221,84532,122970,221937,554235	ACACB,ALDOB,BAAT,ENTPD5,DHFR,ENO3,ACSL1,FBP1,FPGS,HMGCS2,IDH1,ME1,MOCS1,PDK2,PRKAA2,SLC2A1,SLC25A1,TYMS,NAMPT,ALDH1L1,SARM1,ACSL6,HAAO,NNT,UBIAD1,PANK1,DHTKD1,OGDHL,GPAM,CYP4F12,ACSF2,ACSS1,ACOT4,FOXK1,ASPDH
7_Member	GO Biological Processes	GO:0009108	coenzyme biosynthetic process	-3.42722	-1.17788	22/259	32,229,957,1719,2027,2180,2203,2356,4337,5164,5563,6576,10135,23305,23498,29914,53354,55526,55753,84532,221937,554235	ACACB,ALDOB,ENTPD5,DHFR,ENO3,ACSL1,FBP1,FPGS,MOCS1,PDK2,PRKAA2,SLC25A1,NAMPT,ACSL6,HAAO,UBIAD1,PANK1,DHTKD1,OGDHL,ACSS1,FOXK1,ASPDH
7_Member	GO Biological Processes	GO:1901293	nucleoside phosphate biosynthetic process	-3.00574	-0.927243	28/390	32,229,270,957,2027,2180,2203,2981,4199,4882,5164,5563,6241,6576,7298,7371,10135,23305,23498,53354,54209,55526,55753,57678,84532,221937,377841,554235	ACACB,ALDOB,AMPD1,ENTPD5,ENO3,ACSL1,FBP1,GUCA2B,ME1,NPR2,PDK2,PRKAA2,RRM2,SLC25A1,TYMS,UCK2,NAMPT,ACSL6,HAAO,PANK1,TREM2,DHTKD1,OGDHL,GPAM,ACSS1,FOXK1,ENTPD8,ASPDH
7_Member	GO Biological Processes	GO:0090407	organophosphate biosynthetic process	-2.91199	-0.868928	43/696	32,229,270,375,957,1373,2027,2180,2203,2247,2981,3158,3417,3631,4199,4337,4882,5164,5277,5563,6241,6576,6652,7298,7371,7784,10135,23175,23305,23498,23556,53354,54209,55526,55753,57678,83394,84302,84532,221395,221937,377841,554235	ACACB,ALDOB,AMPD1,ARF1,ENTPD5,CPS1,ENO3,ACSL1,FBP1,FGF2,GUCA2B,HMGCS2,IDH1,INPP4A,ME1,MOCS1,NPR2,PDK2,PIGA,PRKAA2,RRM2,SLC25A1,SORD,TYMS,UCK2,ZP3,NAMPT,LPIN1,ACSL6,HAAO,PIGN,PANK1,TREM2,DHTKD1,OGDHL,GPAM,PITPNM3,PGAP4,ACSS1,ADGRF5,FOXK1,ENTPD8,ASPDH
7_Member	GO Biological Processes	GO:0006753	nucleoside phosphate metabolic process	-2.82696	-0.816932	44/724	32,229,270,570,957,2027,2180,2203,2981,3158,3417,4199,4337,4882,5138,5164,5563,6241,6576,6783,6822,7298,7371,7498,9567,10135,10380,23098,23305,23498,23530,27115,53354,54209,55526,55753,57678,80221,84532,120892,122970,221937,377841,554235	ACACB,ALDOB,AMPD1,BAAT,ENTPD5,ENO3,ACSL1,FBP1,GUCA2B,HMGCS2,IDH1,ME1,MOCS1,NPR2,PDE2A,PDK2,PRKAA2,RRM2,SLC25A1,SULT1E1,SULT2A1,TYMS,UCK2,XDH,GTPBP1,NAMPT,BPNT1,SARM1,ACSL6,HAAO,NNT,PDE7B,PANK1,TREM2,DHTKD1,OGDHL,GPAM,ACSF2,ACSS1,LRRK2,ACOT4,FOXK1,ENTPD8,ASPDH
7_Member	GO Biological Processes	GO:0009165	nucleotide biosynthetic process	-2.74073	-0.769292	27/387	32,229,270,957,2027,2180,2203,2981,4199,4882,5164,5563,6241,6576,7298,7371,10135,23305,23498,53354,54209,55526,55753,57678,84532,221937,554235	ACACB,ALDOB,AMPD1,ENTPD5,ENO3,ACSL1,FBP1,GUCA2B,ME1,NPR2,PDK2,PRKAA2,RRM2,SLC25A1,TYMS,UCK2,NAMPT,ACSL6,HAAO,PANK1,TREM2,DHTKD1,OGDHL,GPAM,ACSS1,FOXK1,ASPDH
7_Member	GO Biological Processes	GO:0009117	nucleotide metabolic process	-2.66834	-0.740899	43/717	32,229,270,570,957,2027,2180,2203,2981,3158,3417,4199,4337,4882,5138,5164,5563,6241,6576,6783,6822,7298,7371,7498,9567,10135,10380,23098,23305,23498,23530,27115,53354,54209,55526,55753,57678,80221,84532,120892,122970,221937,554235	ACACB,ALDOB,AMPD1,BAAT,ENTPD5,ENO3,ACSL1,FBP1,GUCA2B,HMGCS2,IDH1,ME1,MOCS1,NPR2,PDE2A,PDK2,PRKAA2,RRM2,SLC25A1,SULT1E1,SULT2A1,TYMS,UCK2,XDH,GTPBP1,NAMPT,BPNT1,SARM1,ACSL6,HAAO,NNT,PDE7B,PANK1,TREM2,DHTKD1,OGDHL,GPAM,ACSF2,ACSS1,LRRK2,ACOT4,FOXK1,ASPDH
7_Member	GO Biological Processes	GO:0051188	cofactor biosynthetic process	-2.56241	-0.683022	23/321	32,229,957,1719,2027,2180,2203,2356,4337,5164,5563,6576,10135,23305,23498,29914,53354,55526,55753,56898,84532,221937,554235	ACACB,ALDOB,ENTPD5,DHFR,ENO3,ACSL1,FBP1,FPGS,MOCS1,PDK2,PRKAA2,SLC25A1,NAMPT,ACSL6,HAAO,UBIAD1,PANK1,DHTKD1,OGDHL,BDH2,ACSS1,FOXK1,ASPDH
7_Member	GO Biological Processes	GO:1901137	carbohydrate derivative biosynthetic process	-2.47002	-0.627558	45/778	28,32,229,270,957,1890,2027,2180,2203,2762,3553,4882,5164,5277,5373,5563,6241,6383,6385,6576,6652,7298,7371,9945,9956,10057,23305,23556,23753,29071,51816,53354,54187,54209,55526,55753,64090,79623,81849,83539,84302,84532,85365,123264,221937	ABO,ACACB,ALDOB,AMPD1,ENTPD5,TYMP,ENO3,ACSL1,FBP1,GMDS,IL1B,NPR2,PDK2,PIGA,PMM2,PRKAA2,RRM2,SDC2,SDC4,SLC25A1,SORD,TYMS,UCK2,GFPT2,HS3ST2,ABCC5,ACSL6,PIGN,SDF2L1,C1GALT1C1,ADA2,PANK1,NANS,TREM2,DHTKD1,OGDHL,GAL3ST2,GALNT14,ST6GALNAC5,CHST9,PGAP4,ACSS1,ALG2,SLC51B,FOXK1
7_Member	GO Biological Processes	GO:0019362	pyridine nucleotide metabolic process	-2.16516	-0.44525	15/193	229,957,2027,2203,3417,4199,5563,10135,23098,23498,23530,55526,55753,221937,554235	ALDOB,ENTPD5,ENO3,FBP1,IDH1,ME1,PRKAA2,NAMPT,SARM1,HAAO,NNT,DHTKD1,OGDHL,FOXK1,ASPDH
7_Member	GO Biological Processes	GO:0046496	nicotinamide nucleotide metabolic process	-2.16516	-0.44525	15/193	229,957,2027,2203,3417,4199,5563,10135,23098,23498,23530,55526,55753,221937,554235	ALDOB,ENTPD5,ENO3,FBP1,IDH1,ME1,PRKAA2,NAMPT,SARM1,HAAO,NNT,DHTKD1,OGDHL,FOXK1,ASPDH
7_Member	GO Biological Processes	GO:0006733	oxidoreduction coenzyme metabolic process	-2.13508	-0.437101	16/213	229,957,2027,2203,3417,4199,5563,10135,23098,23498,23530,29914,55526,55753,221937,554235	ALDOB,ENTPD5,ENO3,FBP1,IDH1,ME1,PRKAA2,NAMPT,SARM1,HAAO,NNT,UBIAD1,DHTKD1,OGDHL,FOXK1,ASPDH
7_Member	GO Biological Processes	GO:0072521	purine-containing compound metabolic process	-2.09194	-0.407901	36/622	32,229,270,570,957,2027,2180,2203,2538,2981,3158,4337,4882,5138,5164,5563,5729,6576,6783,6822,7498,9567,10380,23305,27115,51816,53354,54209,55526,55753,57678,80221,84532,120892,122970,221937	ACACB,ALDOB,AMPD1,BAAT,ENTPD5,ENO3,ACSL1,FBP1,G6PC,GUCA2B,HMGCS2,MOCS1,NPR2,PDE2A,PDK2,PRKAA2,PTGDR,SLC25A1,SULT1E1,SULT2A1,XDH,GTPBP1,BPNT1,ACSL6,PDE7B,ADA2,PANK1,TREM2,DHTKD1,OGDHL,GPAM,ACSF2,ACSS1,LRRK2,ACOT4,FOXK1
7_Member	GO Biological Processes	GO:0072524	pyridine-containing compound metabolic process	-2.02907	-0.372123	15/200	229,957,2027,2203,3417,4199,5563,10135,23098,23498,23530,55526,55753,221937,554235	ALDOB,ENTPD5,ENO3,FBP1,IDH1,ME1,PRKAA2,NAMPT,SARM1,HAAO,NNT,DHTKD1,OGDHL,FOXK1,ASPDH
8_Summary	KEGG Pathway	hsa04146	Peroxisome	-5.04108	-2.21334	14/92	30,570,847,2180,3417,5264,6648,6652,7498,11264,23305,23600,54363,55825,9381,10952,23480,26519,79145,91452,122970,401505,100188893,950,3305,4074,5174,5373,6187,6653,6720,7529,9141,9182,10519,27072,51114,51762,58477,85377,120892,123264,100652748,89866,3030,1736,3587,5366,5514,29107,55506,80149,83882,84455	ACAA1,BAAT,CAT,ACSL1,IDH1,PHYH,SOD2,SORD,XDH,PXMP4,ACSL6,AMACR,HAO1,PECR,OTOF,SEC61B,SEC61G,TIMM10,CHCHD7,ACBD5,ACOT4,TOMM5,TOMM6,SCARB2,HSPA1L,M6PR,PDZK1,PMM2,RPS2,SORL1,SREBF1,YWHAB,PDCD5,RASSF9,CIB1,VPS41,ZDHHC9,RAB8B,SRPRB,MICALL1,LRRK2,SLC51B,TIMM23B,SEC16B,HADHA,DKC1,IL10RA,PMAIP1,PPP1R10,NXT1,MACROH2A2,ZC3H12A,TSPAN10,EFCAB7
8_Member	KEGG Pathway	hsa04146	Peroxisome	-5.04108	-2.21334	14/92	30,570,847,2180,3417,5264,6648,6652,7498,11264,23305,23600,54363,55825	ACAA1,BAAT,CAT,ACSL1,IDH1,PHYH,SOD2,SORD,XDH,PXMP4,ACSL6,AMACR,HAO1,PECR
8_Member	KEGG Pathway	ko04146	Peroxisome	-4.86326	-2.06917	13/83	30,570,847,2180,3417,5264,6648,7498,11264,23305,23600,54363,55825	ACAA1,BAAT,CAT,ACSL1,IDH1,PHYH,SOD2,XDH,PXMP4,ACSL6,AMACR,HAO1,PECR
8_Member	Reactome Gene Sets	R-HSA-9609507	Protein localization	-4.3153	-1.71418	18/163	30,570,847,3417,5264,9381,10952,11264,23480,23600,26519,54363,55825,79145,91452,122970,401505,100188893	ACAA1,BAAT,CAT,IDH1,PHYH,OTOF,SEC61B,PXMP4,SEC61G,AMACR,TIMM10,HAO1,PECR,CHCHD7,ACBD5,ACOT4,TOMM5,TOMM6
8_Member	GO Biological Processes	GO:0006605	protein targeting	-3.70555	-1.31354	33/444	30,570,847,950,3305,3417,4074,5174,5264,5373,6187,6653,6720,7529,9141,9182,10519,10952,23480,23600,26519,27072,51114,51762,54363,55825,58477,85377,120892,122970,123264,401505,100652748	ACAA1,BAAT,CAT,SCARB2,HSPA1L,IDH1,M6PR,PDZK1,PHYH,PMM2,RPS2,SORL1,SREBF1,YWHAB,PDCD5,RASSF9,CIB1,SEC61B,SEC61G,AMACR,TIMM10,VPS41,ZDHHC9,RAB8B,HAO1,PECR,SRPRB,MICALL1,LRRK2,ACOT4,SLC51B,TOMM5,TIMM23B
8_Member	GO Biological Processes	GO:0006625	protein targeting to peroxisome	-3.64196	-1.30037	10/68	30,570,847,3417,5264,23600,51762,54363,55825,122970	ACAA1,BAAT,CAT,IDH1,PHYH,AMACR,RAB8B,HAO1,PECR,ACOT4
8_Member	GO Biological Processes	GO:0072662	protein localization to peroxisome	-3.64196	-1.30037	10/68	30,570,847,3417,5264,23600,51762,54363,55825,122970	ACAA1,BAAT,CAT,IDH1,PHYH,AMACR,RAB8B,HAO1,PECR,ACOT4
8_Member	GO Biological Processes	GO:0072663	establishment of protein localization to peroxisome	-3.64196	-1.30037	10/68	30,570,847,3417,5264,23600,51762,54363,55825,122970	ACAA1,BAAT,CAT,IDH1,PHYH,AMACR,RAB8B,HAO1,PECR,ACOT4
8_Member	GO Biological Processes	GO:0043574	peroxisomal transport	-3.58874	-1.28623	10/69	30,570,847,3417,5264,23600,51762,54363,55825,122970	ACAA1,BAAT,CAT,IDH1,PHYH,AMACR,RAB8B,HAO1,PECR,ACOT4
8_Member	GO Biological Processes	GO:0007031	peroxisome organization	-3.5403	-1.2642	11/83	30,570,847,3417,5264,23600,51762,54363,55825,89866,122970	ACAA1,BAAT,CAT,IDH1,PHYH,AMACR,RAB8B,HAO1,PECR,SEC16B,ACOT4
8_Member	Reactome Gene Sets	R-HSA-9033241	Peroxisomal protein import	-3.23749	-1.08101	9/63	30,570,847,3417,5264,23600,54363,55825,122970	ACAA1,BAAT,CAT,IDH1,PHYH,AMACR,HAO1,PECR,ACOT4
8_Member	Reactome Gene Sets	R-HSA-390918	Peroxisomal lipid metabolism	-3.18712	-1.04769	6/29	30,5264,23600,55825,91452,122970	ACAA1,PHYH,AMACR,PECR,ACBD5,ACOT4
8_Member	KEGG Pathway	ko01040	Biosynthesis of unsaturated fatty acids	-2.83508	-0.821175	5/23	30,570,3030,55825,122970	ACAA1,BAAT,HADHA,PECR,ACOT4
8_Member	GO Biological Processes	GO:0072594	establishment of protein localization to organelle	-2.78023	-0.788085	36/563	30,570,847,950,1736,3305,3417,3587,4074,5264,5366,5373,5514,6187,6653,6720,7529,9141,10952,23480,23600,26519,27072,29107,51762,54363,55506,55825,58477,80149,83882,84455,120892,122970,401505,100652748	ACAA1,BAAT,CAT,SCARB2,DKC1,HSPA1L,IDH1,IL10RA,M6PR,PHYH,PMAIP1,PMM2,PPP1R10,RPS2,SORL1,SREBF1,YWHAB,PDCD5,SEC61B,SEC61G,AMACR,TIMM10,VPS41,NXT1,RAB8B,HAO1,MACROH2A2,PECR,SRPRB,ZC3H12A,TSPAN10,EFCAB7,LRRK2,ACOT4,TOMM5,TIMM23B
8_Member	GO Biological Processes	GO:0001561	fatty acid alpha-oxidation	-2.41784	-0.603063	3/9	5264,54363,55825	PHYH,HAO1,PECR
8_Member	KEGG Pathway	hsa01040	Biosynthesis of unsaturated fatty acids	-2.1221	-0.430987	5/33	30,570,3030,55825,122970	ACAA1,BAAT,HADHA,PECR,ACOT4
9_Summary	GO Biological Processes	GO:0046718	viral entry into host cell	-4.84722	-2.06917	17/135	858,942,950,1605,1803,1949,3695,4360,5806,6554,8519,10332,10410,10572,10581,81603,339390,10189,25978,80149,84321,4939,6041,6347,7153,8091,55196,3662,4435,4502,6358,6368,6812,8651,10062,10435,140885,4882,7076,7784,11005	CAV2,CD86,SCARB2,DAG1,DPP4,EFNB3,ITGB7,MRC1,PTX3,SLC10A1,IFITM1,CLEC4M,IFITM3,SIVA1,IFITM2,TRIM8,CLEC4G,ALYREF,CHMP2B,ZC3H12A,THOC3,OAS2,RNASEL,CCL2,TOP2A,HMGA2,RESF1,IRF4,CITED1,MT2A,CCL14,CCL23,STXBP1,SOCS1,NR1H3,CDC42EP2,SIRPA,NPR2,TIMP1,ZP3,SPINK5
9_Member	GO Biological Processes	GO:0046718	viral entry into host cell	-4.84722	-2.06917	17/135	858,942,950,1605,1803,1949,3695,4360,5806,6554,8519,10332,10410,10572,10581,81603,339390	CAV2,CD86,SCARB2,DAG1,DPP4,EFNB3,ITGB7,MRC1,PTX3,SLC10A1,IFITM1,CLEC4M,IFITM3,SIVA1,IFITM2,TRIM8,CLEC4G
9_Member	GO Biological Processes	GO:0030260	entry into host cell	-4.32611	-1.71418	17/148	858,942,950,1605,1803,1949,3695,4360,5806,6554,8519,10332,10410,10572,10581,81603,339390	CAV2,CD86,SCARB2,DAG1,DPP4,EFNB3,ITGB7,MRC1,PTX3,SLC10A1,IFITM1,CLEC4M,IFITM3,SIVA1,IFITM2,TRIM8,CLEC4G
9_Member	GO Biological Processes	GO:0044409	entry into host	-4.32611	-1.71418	17/148	858,942,950,1605,1803,1949,3695,4360,5806,6554,8519,10332,10410,10572,10581,81603,339390	CAV2,CD86,SCARB2,DAG1,DPP4,EFNB3,ITGB7,MRC1,PTX3,SLC10A1,IFITM1,CLEC4M,IFITM3,SIVA1,IFITM2,TRIM8,CLEC4G
9_Member	GO Biological Processes	GO:0051806	entry into cell of other organism involved in symbiotic interaction	-4.32611	-1.71418	17/148	858,942,950,1605,1803,1949,3695,4360,5806,6554,8519,10332,10410,10572,10581,81603,339390	CAV2,CD86,SCARB2,DAG1,DPP4,EFNB3,ITGB7,MRC1,PTX3,SLC10A1,IFITM1,CLEC4M,IFITM3,SIVA1,IFITM2,TRIM8,CLEC4G
9_Member	GO Biological Processes	GO:0051828	entry into other organism involved in symbiotic interaction	-4.28881	-1.70599	17/149	858,942,950,1605,1803,1949,3695,4360,5806,6554,8519,10332,10410,10572,10581,81603,339390	CAV2,CD86,SCARB2,DAG1,DPP4,EFNB3,ITGB7,MRC1,PTX3,SLC10A1,IFITM1,CLEC4M,IFITM3,SIVA1,IFITM2,TRIM8,CLEC4G
9_Member	GO Biological Processes	GO:0051701	interaction with host	-4.10586	-1.57252	21/216	858,942,950,1605,1803,1949,3695,4360,5806,6554,8519,10189,10332,10410,10572,10581,25978,80149,81603,84321,339390	CAV2,CD86,SCARB2,DAG1,DPP4,EFNB3,ITGB7,MRC1,PTX3,SLC10A1,IFITM1,ALYREF,CLEC4M,IFITM3,SIVA1,IFITM2,CHMP2B,ZC3H12A,TRIM8,THOC3,CLEC4G
9_Member	GO Biological Processes	GO:0046597	negative regulation of viral entry into host cell	-3.36092	-1.13524	5/18	5806,8519,10410,10581,81603	PTX3,IFITM1,IFITM3,IFITM2,TRIM8
9_Member	GO Biological Processes	GO:0019058	viral life cycle	-2.85356	-0.831588	25/342	858,942,950,1605,1803,1949,3695,4360,4939,5806,6041,6347,6554,7153,8091,8519,10332,10410,10572,10581,25978,55196,80149,81603,339390	CAV2,CD86,SCARB2,DAG1,DPP4,EFNB3,ITGB7,MRC1,OAS2,PTX3,RNASEL,CCL2,SLC10A1,TOP2A,HMGA2,IFITM1,CLEC4M,IFITM3,SIVA1,IFITM2,CHMP2B,RESF1,ZC3H12A,TRIM8,CLEC4G
9_Member	GO Biological Processes	GO:1903901	negative regulation of viral life cycle	-2.8216	-0.816932	10/86	4939,5806,6041,8091,8519,10410,10581,55196,80149,81603	OAS2,PTX3,RNASEL,HMGA2,IFITM1,IFITM3,IFITM2,RESF1,ZC3H12A,TRIM8
9_Member	GO Biological Processes	GO:0034341	response to interferon-gamma	-2.73897	-0.769292	17/202	3662,4360,4435,4502,4939,6347,6358,6368,6812,8519,8651,10062,10410,10435,10581,81603,140885	IRF4,MRC1,CITED1,MT2A,OAS2,CCL2,CCL14,CCL23,STXBP1,IFITM1,SOCS1,NR1H3,IFITM3,CDC42EP2,IFITM2,TRIM8,SIRPA
9_Member	GO Biological Processes	GO:0045071	negative regulation of viral genome replication	-2.69167	-0.753656	8/61	4939,6041,8091,8519,10410,10581,55196,80149	OAS2,RNASEL,HMGA2,IFITM1,IFITM3,IFITM2,RESF1,ZC3H12A
9_Member	GO Biological Processes	GO:0048525	negative regulation of viral process	-2.27641	-0.511063	10/102	4939,5806,6041,8091,8519,10410,10581,55196,80149,81603	OAS2,PTX3,RNASEL,HMGA2,IFITM1,IFITM3,IFITM2,RESF1,ZC3H12A,TRIM8
9_Member	GO Biological Processes	GO:1903900	regulation of viral life cycle	-2.16614	-0.44525	13/157	858,4939,5806,6041,7153,8091,8519,10410,10581,25978,55196,80149,81603	CAV2,OAS2,PTX3,RNASEL,TOP2A,HMGA2,IFITM1,IFITM3,IFITM2,CHMP2B,RESF1,ZC3H12A,TRIM8
9_Member	GO Biological Processes	GO:0043901	negative regulation of multi-organism process	-2.12037	-0.430216	14/177	4882,4939,5806,6041,7076,7784,8091,8519,10410,10581,11005,55196,80149,81603	NPR2,OAS2,PTX3,RNASEL,TIMP1,ZP3,HMGA2,IFITM1,IFITM3,IFITM2,SPINK5,RESF1,ZC3H12A,TRIM8
9_Member	GO Biological Processes	GO:0019079	viral genome replication	-2.05061	-0.379216	11/127	4939,6041,6347,7153,8091,8519,10332,10410,10581,55196,80149	OAS2,RNASEL,CCL2,TOP2A,HMGA2,IFITM1,CLEC4M,IFITM3,IFITM2,RESF1,ZC3H12A
10_Summary	KEGG Pathway	ko03320	PPAR signaling pathway	-4.81609	-2.04962	12/72	30,33,34,123,2167,2168,2180,3158,4199,10062,23305,116519,2222,2274,6720,6822,55090	ACAA1,ACADL,ACADM,PLIN2,FABP4,FABP1,ACSL1,HMGCS2,ME1,NR1H3,ACSL6,APOA5,FDFT1,FHL2,SREBF1,SULT2A1,MED9
10_Member	KEGG Pathway	ko03320	PPAR signaling pathway	-4.81609	-2.04962	12/72	30,33,34,123,2167,2168,2180,3158,4199,10062,23305,116519	ACAA1,ACADL,ACADM,PLIN2,FABP4,FABP1,ACSL1,HMGCS2,ME1,NR1H3,ACSL6,APOA5
10_Member	KEGG Pathway	hsa03320	PPAR signaling pathway	-4.02875	-1.52134	12/86	30,33,34,123,2167,2168,2180,3158,4199,10062,23305,116519	ACAA1,ACADL,ACADM,PLIN2,FABP4,FABP1,ACSL1,HMGCS2,ME1,NR1H3,ACSL6,APOA5
10_Member	Reactome Gene Sets	R-HSA-1989781	PPARA activates gene expression	-3.30784	-1.09831	13/117	34,123,2168,2180,2222,2274,3158,4199,6720,6822,10062,55090,116519	ACADM,PLIN2,FABP1,ACSL1,FDFT1,FHL2,HMGCS2,ME1,SREBF1,SULT2A1,NR1H3,MED9,APOA5
10_Member	Reactome Gene Sets	R-HSA-400206	Regulation of lipid metabolism by PPARalpha	-3.23694	-1.08101	13/119	34,123,2168,2180,2222,2274,3158,4199,6720,6822,10062,55090,116519	ACADM,PLIN2,FABP1,ACSL1,FDFT1,FHL2,HMGCS2,ME1,SREBF1,SULT2A1,NR1H3,MED9,APOA5
11_Summary	GO Biological Processes	GO:1901136	carbohydrate derivative catabolic process	-4.69561	-1.95141	21/197	313,1890,2247,2592,2760,3161,4126,4668,5138,6383,6385,10855,10894,27115,51816,55347,55576,56999,80896,93611,114770,3553,10057,9956,50859,83539	AOAH,TYMP,FGF2,GALT,GM2A,HMMR,MANBA,NAGA,PDE2A,SDC2,SDC4,HPSE,LYVE1,PDE7B,ADA2,ABHD10,STAB2,ADAMTS9,NPL,FBXO44,PGLYRP2,IL1B,ABCC5,HS3ST2,SPOCK3,CHST9
11_Member	GO Biological Processes	GO:1901136	carbohydrate derivative catabolic process	-4.69561	-1.95141	21/197	313,1890,2247,2592,2760,3161,4126,4668,5138,6383,6385,10855,10894,27115,51816,55347,55576,56999,80896,93611,114770	AOAH,TYMP,FGF2,GALT,GM2A,HMMR,MANBA,NAGA,PDE2A,SDC2,SDC4,HPSE,LYVE1,PDE7B,ADA2,ABHD10,STAB2,ADAMTS9,NPL,FBXO44,PGLYRP2
11_Member	GO Biological Processes	GO:0006027	glycosaminoglycan catabolic process	-2.69167	-0.753656	8/61	2247,3161,6383,6385,10855,10894,55576,114770	FGF2,HMMR,SDC2,SDC4,HPSE,LYVE1,STAB2,PGLYRP2
11_Member	GO Biological Processes	GO:0030212	hyaluronan metabolic process	-2.60912	-0.697947	6/37	2247,3161,3553,10057,10894,55576	FGF2,HMMR,IL1B,ABCC5,LYVE1,STAB2
11_Member	GO Biological Processes	GO:0030214	hyaluronan catabolic process	-2.58939	-0.697274	4/16	2247,3161,10894,55576	FGF2,HMMR,LYVE1,STAB2
11_Member	Reactome Gene Sets	R-HSA-2142845	Hyaluronan metabolism	-2.48596	-0.638019	4/17	3161,10057,10894,55576	HMMR,ABCC5,LYVE1,STAB2
11_Member	GO Biological Processes	GO:0006026	aminoglycan catabolic process	-2.43243	-0.607314	8/67	2247,3161,6383,6385,10855,10894,55576,114770	FGF2,HMMR,SDC2,SDC4,HPSE,LYVE1,STAB2,PGLYRP2
11_Member	GO Biological Processes	GO:0030203	glycosaminoglycan metabolic process	-2.14368	-0.438902	13/158	2247,3161,3553,6383,6385,9956,10057,10855,10894,50859,55576,83539,114770	FGF2,HMMR,IL1B,SDC2,SDC4,HS3ST2,ABCC5,HPSE,LYVE1,SPOCK3,STAB2,CHST9,PGLYRP2
11_Member	Reactome Gene Sets	R-HSA-2160916	Hyaluronan uptake and degradation	-2.03657	-0.377848	3/12	3161,10894,55576	HMMR,LYVE1,STAB2
12_Summary	KEGG Pathway	hsa01200	Carbon metabolism	-4.57635	-1.87383	15/114	34,229,847,1373,2027,2203,2731,2806,3030,3417,4199,5723,54363,55753,84532,440,493,586,63826,65263	ACADM,ALDOB,CAT,CPS1,ENO3,FBP1,GLDC,GOT2,HADHA,IDH1,ME1,PSPH,HAO1,OGDHL,ACSS1,ASNS,ATP2B4,BCAT1,SRR,PYCR3
12_Member	KEGG Pathway	hsa01200	Carbon metabolism	-4.57635	-1.87383	15/114	34,229,847,1373,2027,2203,2731,2806,3030,3417,4199,5723,54363,55753,84532	ACADM,ALDOB,CAT,CPS1,ENO3,FBP1,GLDC,GOT2,HADHA,IDH1,ME1,PSPH,HAO1,OGDHL,ACSS1
12_Member	KEGG Pathway	ko01200	Carbon metabolism	-4.57635	-1.87383	15/114	34,229,847,1373,2027,2203,2731,2806,3030,3417,4199,5723,54363,55753,84532	ACADM,ALDOB,CAT,CPS1,ENO3,FBP1,GLDC,GOT2,HADHA,IDH1,ME1,PSPH,HAO1,OGDHL,ACSS1
12_Member	GO Biological Processes	GO:1901607	alpha-amino acid biosynthetic process	-2.35319	-0.563235	8/69	440,493,586,1373,2806,5723,63826,65263	ASNS,ATP2B4,BCAT1,CPS1,GOT2,PSPH,SRR,PYCR3
12_Member	KEGG Pathway	hsa01230	Biosynthesis of amino acids	-2.13402	-0.437101	8/75	229,586,1373,2027,2806,3417,5723,65263	ALDOB,BCAT1,CPS1,ENO3,GOT2,IDH1,PSPH,PYCR3
12_Member	KEGG Pathway	ko01230	Biosynthesis of amino acids	-2.13402	-0.437101	8/75	229,586,1373,2027,2806,3417,5723,65263	ALDOB,BCAT1,CPS1,ENO3,GOT2,IDH1,PSPH,PYCR3
13_Summary	Reactome Gene Sets	R-HSA-77288	mitochondrial fatty acid beta-oxidation of unsaturated fatty acids	-4.54153	-1.85803	4/6	33,34,3030,3032,30,2180,23305,55825,2110,586,3158	ACADL,ACADM,HADHA,HADHB,ACAA1,ACSL1,ACSL6,PECR,ETFDH,BCAT1,HMGCS2
13_Member	Reactome Gene Sets	R-HSA-77288	mitochondrial fatty acid beta-oxidation of unsaturated fatty acids	-4.54153	-1.85803	4/6	33,34,3030,3032	ACADL,ACADM,HADHA,HADHB
13_Member	KEGG Pathway	M00087	beta-Oxidation	-4.31273	-1.71418	5/12	30,33,34,3030,3032	ACAA1,ACADL,ACADM,HADHA,HADHB
13_Member	KEGG Pathway	hsa_M00087	beta-Oxidation	-4.31273	-1.71418	5/12	30,33,34,3030,3032	ACAA1,ACADL,ACADM,HADHA,HADHB
13_Member	Reactome Gene Sets	R-HSA-77285	Beta oxidation of myristoyl-CoA to lauroyl-CoA	-4.26769	-1.69229	3/3	33,3030,3032	ACADL,HADHA,HADHB
13_Member	KEGG Pathway	hsa01212	Fatty acid metabolism	-3.39643	-1.15738	8/48	30,33,34,2180,3030,3032,23305,55825	ACAA1,ACADL,ACADM,ACSL1,HADHA,HADHB,ACSL6,PECR
13_Member	KEGG Pathway	ko01212	Fatty acid metabolism	-3.39643	-1.15738	8/48	30,33,34,2180,3030,3032,23305,55825	ACAA1,ACADL,ACADM,ACSL1,HADHA,HADHB,ACSL6,PECR
13_Member	Reactome Gene Sets	R-HSA-77310	Beta oxidation of lauroyl-CoA to decanoyl-CoA-CoA	-3.2926	-1.09382	3/5	33,3030,3032	ACADL,HADHA,HADHB
13_Member	Reactome Gene Sets	R-HSA-77348	Beta oxidation of octanoyl-CoA to hexanoyl-CoA	-3.2926	-1.09382	3/5	34,3030,3032	ACADM,HADHA,HADHB
13_Member	Reactome Gene Sets	R-HSA-77286	mitochondrial fatty acid beta-oxidation of saturated fatty acids	-3.26525	-1.08631	4/11	33,34,3030,3032	ACADL,ACADM,HADHA,HADHB
13_Member	Reactome Gene Sets	R-HSA-77346	Beta oxidation of decanoyl-CoA to octanoyl-CoA-CoA	-3.00399	-0.927243	3/6	34,3030,3032	ACADM,HADHA,HADHB
13_Member	KEGG Pathway	ko00071	Fatty acid degradation	-2.91206	-0.868928	7/44	30,33,34,2180,3030,3032,23305	ACAA1,ACADL,ACADM,ACSL1,HADHA,HADHB,ACSL6
13_Member	KEGG Pathway	hsa00071	Fatty acid degradation	-2.73951	-0.769292	7/47	30,33,34,2180,3030,3032,23305	ACAA1,ACADL,ACADM,ACSL1,HADHA,HADHB,ACSL6
13_Member	GO Biological Processes	GO:0033539	fatty acid beta-oxidation using acyl-CoA dehydrogenase	-2.14925	-0.439673	3/11	33,34,2110	ACADL,ACADM,ETFDH
13_Member	KEGG Pathway	ko00280	Valine, leucine and isoleucine degradation	-2.03894	-0.377848	6/48	30,34,586,3030,3032,3158	ACAA1,ACADM,BCAT1,HADHA,HADHB,HMGCS2
14_Summary	GO Biological Processes	GO:0015718	monocarboxylic acid transport	-4.48728	-1.82226	19/173	32,123,788,2167,2168,2180,2806,3553,4282,5563,5565,6513,6554,7057,9194,11309,123264,200931,201232,950,1183,1193,2538,2564,4036,5174,6520,6549,6576,6812,9056,10057,11238,23428,29127,51449,55089,55107,63982,116519,219855,253512,284439,388121,2760,4481,6713,10062,10226,54762,80149,80831	ACACB,PLIN2,SLC25A20,FABP4,FABP1,ACSL1,GOT2,IL1B,MIF,PRKAA2,PRKAB2,SLC2A1,SLC10A1,THBS1,SLC16A7,SLCO2B1,SLC51B,SLC51A,SLC16A13,SCARB2,CLCN4,CLIC2,G6PC,GABRE,LRP2,PDZK1,SLC3A2,SLC9A2,SLC25A1,STXBP1,SLC7A7,ABCC5,CA5B,SLC7A8,RACGAP1,PCYOX1,SLC38A4,ANO1,ANO3,APOA5,SLC37A2,SLC25A30,SLC25A42,TNFAIP8L3,GM2A,MSR1,SQLE,NR1H3,PLIN3,GRAMD1C,ZC3H12A,APOL5
14_Member	GO Biological Processes	GO:0015718	monocarboxylic acid transport	-4.48728	-1.82226	19/173	32,123,788,2167,2168,2180,2806,3553,4282,5563,5565,6513,6554,7057,9194,11309,123264,200931,201232	ACACB,PLIN2,SLC25A20,FABP4,FABP1,ACSL1,GOT2,IL1B,MIF,PRKAA2,PRKAB2,SLC2A1,SLC10A1,THBS1,SLC16A7,SLCO2B1,SLC51B,SLC51A,SLC16A13
14_Member	GO Biological Processes	GO:0015908	fatty acid transport	-3.94699	-1.45833	13/101	32,123,788,2167,2168,2180,2806,3553,4282,5563,5565,6513,7057	ACACB,PLIN2,SLC25A20,FABP4,FABP1,ACSL1,GOT2,IL1B,MIF,PRKAA2,PRKAB2,SLC2A1,THBS1
14_Member	GO Biological Processes	GO:0015909	long-chain fatty acid transport	-3.93902	-1.45833	11/75	32,123,788,2167,2168,2180,4282,5563,5565,6513,7057	ACACB,PLIN2,SLC25A20,FABP4,FABP1,ACSL1,MIF,PRKAA2,PRKAB2,SLC2A1,THBS1
14_Member	GO Biological Processes	GO:0006820	anion transport	-3.70674	-1.31354	44/656	32,123,788,950,1183,1193,2167,2168,2180,2538,2564,2806,3553,4036,4282,5174,5563,5565,6513,6520,6549,6554,6576,6812,7057,9056,9194,10057,11238,11309,23428,29127,51449,55089,55107,63982,116519,123264,200931,201232,219855,253512,284439,388121	ACACB,PLIN2,SLC25A20,SCARB2,CLCN4,CLIC2,FABP4,FABP1,ACSL1,G6PC,GABRE,GOT2,IL1B,LRP2,MIF,PDZK1,PRKAA2,PRKAB2,SLC2A1,SLC3A2,SLC9A2,SLC10A1,SLC25A1,STXBP1,THBS1,SLC7A7,SLC16A7,ABCC5,CA5B,SLCO2B1,SLC7A8,RACGAP1,PCYOX1,SLC38A4,ANO1,ANO3,APOA5,SLC51B,SLC51A,SLC16A13,SLC37A2,SLC25A30,SLC25A42,TNFAIP8L3
14_Member	GO Biological Processes	GO:0046942	carboxylic acid transport	-3.33228	-1.11636	27/353	32,123,788,2167,2168,2180,2806,3553,4036,4282,5563,5565,6513,6520,6554,6576,6812,7057,9056,9194,11309,23428,55089,123264,200931,201232,253512	ACACB,PLIN2,SLC25A20,FABP4,FABP1,ACSL1,GOT2,IL1B,LRP2,MIF,PRKAA2,PRKAB2,SLC2A1,SLC3A2,SLC10A1,SLC25A1,STXBP1,THBS1,SLC7A7,SLC16A7,SLCO2B1,SLC7A8,SLC38A4,SLC51B,SLC51A,SLC16A13,SLC25A30
14_Member	GO Biological Processes	GO:0015849	organic acid transport	-3.31333	-1.10062	27/354	32,123,788,2167,2168,2180,2806,3553,4036,4282,5563,5565,6513,6520,6554,6576,6812,7057,9056,9194,11309,23428,55089,123264,200931,201232,253512	ACACB,PLIN2,SLC25A20,FABP4,FABP1,ACSL1,GOT2,IL1B,LRP2,MIF,PRKAA2,PRKAB2,SLC2A1,SLC3A2,SLC10A1,SLC25A1,STXBP1,THBS1,SLC7A7,SLC16A7,SLCO2B1,SLC7A8,SLC38A4,SLC51B,SLC51A,SLC16A13,SLC25A30
14_Member	GO Biological Processes	GO:0015711	organic anion transport	-3.29336	-1.09382	35/507	32,123,788,950,2167,2168,2180,2538,2806,3553,4036,4282,5563,5565,6513,6520,6554,6576,6812,7057,9056,9194,10057,11238,11309,23428,55089,116519,123264,200931,201232,219855,253512,284439,388121	ACACB,PLIN2,SLC25A20,SCARB2,FABP4,FABP1,ACSL1,G6PC,GOT2,IL1B,LRP2,MIF,PRKAA2,PRKAB2,SLC2A1,SLC3A2,SLC10A1,SLC25A1,STXBP1,THBS1,SLC7A7,SLC16A7,ABCC5,CA5B,SLCO2B1,SLC7A8,SLC38A4,APOA5,SLC51B,SLC51A,SLC16A13,SLC37A2,SLC25A30,SLC25A42,TNFAIP8L3
14_Member	GO Biological Processes	GO:1905039	carboxylic acid transmembrane transport	-2.82076	-0.816932	14/148	32,788,4036,5563,5565,6513,6520,6576,7057,9056,9194,23428,55089,253512	ACACB,SLC25A20,LRP2,PRKAA2,PRKAB2,SLC2A1,SLC3A2,SLC25A1,THBS1,SLC7A7,SLC16A7,SLC7A8,SLC38A4,SLC25A30
14_Member	GO Biological Processes	GO:1903825	organic acid transmembrane transport	-2.79293	-0.798862	14/149	32,788,4036,5563,5565,6513,6520,6576,7057,9056,9194,23428,55089,253512	ACACB,SLC25A20,LRP2,PRKAA2,PRKAB2,SLC2A1,SLC3A2,SLC25A1,THBS1,SLC7A7,SLC16A7,SLC7A8,SLC38A4,SLC25A30
14_Member	GO Biological Processes	GO:0098656	anion transmembrane transport	-2.71858	-0.756139	23/312	32,788,1183,1193,2564,4036,5563,5565,6513,6520,6549,6576,7057,9056,9194,23428,51449,55089,55107,63982,219855,253512,284439	ACACB,SLC25A20,CLCN4,CLIC2,GABRE,LRP2,PRKAA2,PRKAB2,SLC2A1,SLC3A2,SLC9A2,SLC25A1,THBS1,SLC7A7,SLC16A7,SLC7A8,PCYOX1,SLC38A4,ANO1,ANO3,SLC37A2,SLC25A30,SLC25A42
14_Member	GO Biological Processes	GO:0010876	lipid localization	-2.53751	-0.669161	28/420	32,123,788,950,2167,2168,2180,2760,2806,3553,4282,4481,5563,5565,6513,6554,6713,7057,10062,10226,11309,54762,80149,80831,116519,123264,200931,388121	ACACB,PLIN2,SLC25A20,SCARB2,FABP4,FABP1,ACSL1,GM2A,GOT2,IL1B,MIF,MSR1,PRKAA2,PRKAB2,SLC2A1,SLC10A1,SQLE,THBS1,NR1H3,PLIN3,SLCO2B1,GRAMD1C,ZC3H12A,APOL5,APOA5,SLC51B,SLC51A,TNFAIP8L3
14_Member	GO Biological Processes	GO:0006869	lipid transport	-2.35583	-0.563235	25/373	32,123,788,950,2167,2168,2180,2760,2806,3553,4282,4481,5563,5565,6513,6554,7057,10062,11309,54762,80831,116519,123264,200931,388121	ACACB,PLIN2,SLC25A20,SCARB2,FABP4,FABP1,ACSL1,GM2A,GOT2,IL1B,MIF,MSR1,PRKAA2,PRKAB2,SLC2A1,SLC10A1,THBS1,NR1H3,SLCO2B1,GRAMD1C,APOL5,APOA5,SLC51B,SLC51A,TNFAIP8L3
15_Summary	GO Biological Processes	GO:1902001	fatty acid transmembrane transport	-4.28976	-1.70599	6/19	32,788,5563,5565,6513,7057,123,10226,2180,2538,4793,23305,57818,6720,9882,9945,10062,22877,90993,2203,5260,5871,150094,23178,79191,353500	ACACB,SLC25A20,PRKAA2,PRKAB2,SLC2A1,THBS1,PLIN2,PLIN3,ACSL1,G6PC,NFKBIB,ACSL6,G6PC2,SREBF1,TBC1D4,GFPT2,NR1H3,MLXIP,CREB3L1,FBP1,PHKG1,MAP4K2,SIK1,PASK,IRX3,BMP8A
15_Member	GO Biological Processes	GO:1902001	fatty acid transmembrane transport	-4.28976	-1.70599	6/19	32,788,5563,5565,6513,7057	ACACB,SLC25A20,PRKAA2,PRKAB2,SLC2A1,THBS1
15_Member	Reactome Gene Sets	R-HSA-9613354	Lipophagy	-3.65699	-1.30037	4/9	123,5563,5565,10226	PLIN2,PRKAA2,PRKAB2,PLIN3
15_Member	GO Biological Processes	GO:0006853	carnitine shuttle	-3.26525	-1.08631	4/11	32,788,5563,5565	ACACB,SLC25A20,PRKAA2,PRKAB2
15_Member	KEGG Pathway	ko04920	Adipocytokine signaling pathway	-2.94583	-0.882881	9/69	32,2180,2538,4793,5563,5565,6513,23305,57818	ACACB,ACSL1,G6PC,NFKBIB,PRKAA2,PRKAB2,SLC2A1,ACSL6,G6PC2
15_Member	KEGG Pathway	hsa04931	insulin resistance	-2.92308	-0.868928	12/113	32,2538,5563,5565,6513,6720,9882,9945,10062,22877,57818,90993	ACACB,G6PC,PRKAA2,PRKAB2,SLC2A1,SREBF1,TBC1D4,GFPT2,NR1H3,MLXIP,G6PC2,CREB3L1
15_Member	Reactome Gene Sets	R-HSA-200425	Carnitine metabolism	-2.8228	-0.816932	4/14	32,788,5563,5565	ACACB,SLC25A20,PRKAA2,PRKAB2
15_Member	KEGG Pathway	hsa04920	Adipocytokine signaling pathway	-2.8129	-0.81689	9/72	32,2180,2538,4793,5563,5565,6513,23305,57818	ACACB,ACSL1,G6PC,NFKBIB,PRKAA2,PRKAB2,SLC2A1,ACSL6,G6PC2
15_Member	KEGG Pathway	hsa04922	Glucagon signaling pathway	-2.61275	-0.697947	11/107	32,2203,2538,5260,5563,5565,5871,6513,57818,90993,150094	ACACB,FBP1,G6PC,PHKG1,PRKAA2,PRKAB2,MAP4K2,SLC2A1,G6PC2,CREB3L1,SIK1
15_Member	KEGG Pathway	ko04922	Glucagon signaling pathway	-2.24663	-0.491438	10/103	32,2203,2538,5260,5563,5565,6513,57818,90993,150094	ACACB,FBP1,G6PC,PHKG1,PRKAA2,PRKAB2,SLC2A1,G6PC2,CREB3L1,SIK1
15_Member	GO Biological Processes	GO:0097009	energy homeostasis	-2.01298	-0.361333	5/35	32,5563,23178,79191,353500	ACACB,PRKAA2,PASK,IRX3,BMP8A
16_Summary	GO Biological Processes	GO:0043030	regulation of macrophage activation	-4.17403	-1.62016	10/59	2213,4282,7057,8877,9173,10062,54209,80149,120892,221395,10135	FCGR2B,MIF,THBS1,SPHK1,IL1RL1,NR1H3,TREM2,ZC3H12A,LRRK2,ADGRF5,NAMPT
16_Member	GO Biological Processes	GO:0043030	regulation of macrophage activation	-4.17403	-1.62016	10/59	2213,4282,7057,8877,9173,10062,54209,80149,120892,221395	FCGR2B,MIF,THBS1,SPHK1,IL1RL1,NR1H3,TREM2,ZC3H12A,LRRK2,ADGRF5
16_Member	GO Biological Processes	GO:0042116	macrophage activation	-2.81404	-0.81689	11/101	2213,4282,7057,8877,9173,10062,10135,54209,80149,120892,221395	FCGR2B,MIF,THBS1,SPHK1,IL1RL1,NR1H3,NAMPT,TREM2,ZC3H12A,LRRK2,ADGRF5
16_Member	GO Biological Processes	GO:0043031	negative regulation of macrophage activation	-2.38988	-0.581791	4/18	2213,10062,80149,221395	FCGR2B,NR1H3,ZC3H12A,ADGRF5
17_Summary	GO Biological Processes	GO:0006641	triglyceride metabolic process	-4.15072	-1.60381	14/110	847,1373,2167,2168,2180,2538,6653,6720,10062,23175,57678,80168,116519,150094,57406,375,1154,2247,3030,3032,3631,5277,5920,7784,8651,10380,23556,83394,84302,284161,10226	CAT,CPS1,FABP4,FABP1,ACSL1,G6PC,SORL1,SREBF1,NR1H3,LPIN1,GPAM,MOGAT2,APOA5,SIK1,ABHD6,ARF1,CISH,FGF2,HADHA,HADHB,INPP4A,PIGA,PLAAT4,ZP3,SOCS1,BPNT1,PIGN,PITPNM3,PGAP4,GDPD1,PLIN3
17_Member	GO Biological Processes	GO:0006641	triglyceride metabolic process	-4.15072	-1.60381	14/110	847,1373,2167,2168,2180,2538,6653,6720,10062,23175,57678,80168,116519,150094	CAT,CPS1,FABP4,FABP1,ACSL1,G6PC,SORL1,SREBF1,NR1H3,LPIN1,GPAM,MOGAT2,APOA5,SIK1
17_Member	GO Biological Processes	GO:0006638	neutral lipid metabolic process	-3.62132	-1.30037	15/138	847,1373,2167,2168,2180,2538,6653,6720,10062,23175,57406,57678,80168,116519,150094	CAT,CPS1,FABP4,FABP1,ACSL1,G6PC,SORL1,SREBF1,NR1H3,LPIN1,ABHD6,GPAM,MOGAT2,APOA5,SIK1
17_Member	GO Biological Processes	GO:0006639	acylglycerol metabolic process	-3.62132	-1.30037	15/138	847,1373,2167,2168,2180,2538,6653,6720,10062,23175,57406,57678,80168,116519,150094	CAT,CPS1,FABP4,FABP1,ACSL1,G6PC,SORL1,SREBF1,NR1H3,LPIN1,ABHD6,GPAM,MOGAT2,APOA5,SIK1
17_Member	GO Biological Processes	GO:0019432	triglyceride biosynthetic process	-2.97309	-0.9033	7/43	2180,6720,10062,23175,57678,80168,150094	ACSL1,SREBF1,NR1H3,LPIN1,GPAM,MOGAT2,SIK1
17_Member	GO Biological Processes	GO:0046486	glycerolipid metabolic process	-2.91708	-0.868928	30/434	375,847,1154,1373,2167,2168,2180,2247,2538,3030,3032,3631,5277,5920,6653,6720,7784,8651,10062,10380,23175,23556,57406,57678,80168,83394,84302,116519,150094,284161	ARF1,CAT,CISH,CPS1,FABP4,FABP1,ACSL1,FGF2,G6PC,HADHA,HADHB,INPP4A,PIGA,PLAAT4,SORL1,SREBF1,ZP3,SOCS1,NR1H3,BPNT1,LPIN1,PIGN,ABHD6,GPAM,MOGAT2,PITPNM3,PGAP4,APOA5,SIK1,GDPD1
17_Member	Reactome Gene Sets	R-HSA-8979227	Triglyceride metabolism	-2.60912	-0.697947	6/37	2167,2168,10226,23175,57678,80168	FABP4,FABP1,PLIN3,LPIN1,GPAM,MOGAT2
17_Member	GO Biological Processes	GO:0046460	neutral lipid biosynthetic process	-2.53117	-0.669161	7/51	2180,6720,10062,23175,57678,80168,150094	ACSL1,SREBF1,NR1H3,LPIN1,GPAM,MOGAT2,SIK1
17_Member	GO Biological Processes	GO:0046463	acylglycerol biosynthetic process	-2.53117	-0.669161	7/51	2180,6720,10062,23175,57678,80168,150094	ACSL1,SREBF1,NR1H3,LPIN1,GPAM,MOGAT2,SIK1
18_Summary	GO Biological Processes	GO:0090344	negative regulation of cell aging	-4.08787	-1.56301	7/29	1021,2305,4282,8091,10135,55532,80317,133,148,847,1605,2027,4335,4791,5054,6648,6720,6926,7076,7077,7298,57817,63826,120892	CDK6,FOXM1,MIF,HMGA2,NAMPT,SLC30A10,ZKSCAN3,ADM,ADRA1A,CAT,DAG1,ENO3,MNT,NFKB2,SERPINE1,SOD2,SREBF1,TBX3,TIMP1,TIMP2,TYMS,HAMP,SRR,LRRK2
18_Member	GO Biological Processes	GO:0090344	negative regulation of cell aging	-4.08787	-1.56301	7/29	1021,2305,4282,8091,10135,55532,80317	CDK6,FOXM1,MIF,HMGA2,NAMPT,SLC30A10,ZKSCAN3
18_Member	GO Biological Processes	GO:0007568	aging	-2.93057	-0.872118	24/319	133,148,847,1021,1605,2027,2305,4282,4335,4791,5054,6648,6720,6926,7076,7077,7298,8091,10135,55532,57817,63826,80317,120892	ADM,ADRA1A,CAT,CDK6,DAG1,ENO3,FOXM1,MIF,MNT,NFKB2,SERPINE1,SOD2,SREBF1,TBX3,TIMP1,TIMP2,TYMS,HMGA2,NAMPT,SLC30A10,HAMP,SRR,ZKSCAN3,LRRK2
18_Member	GO Biological Processes	GO:2000773	negative regulation of cellular senescence	-2.83508	-0.821175	5/23	1021,8091,10135,55532,80317	CDK6,HMGA2,NAMPT,SLC30A10,ZKSCAN3
18_Member	GO Biological Processes	GO:0090342	regulation of cell aging	-2.09603	-0.410637	7/61	1021,2305,4282,8091,10135,55532,80317	CDK6,FOXM1,MIF,HMGA2,NAMPT,SLC30A10,ZKSCAN3
19_Summary	GO Biological Processes	GO:0043648	dicarboxylic acid metabolic process	-4.08319	-1.56301	13/98	1719,2356,2806,3417,4199,5264,7915,10840,23498,79944,80017,112817,122970,33,1735,51449,2731,54363,55526	DHFR,FPGS,GOT2,IDH1,ME1,PHYH,ALDH5A1,ALDH1L1,HAAO,L2HGDH,DGLUCY,HOGA1,ACOT4,ACADL,DIO3,PCYOX1,GLDC,HAO1,DHTKD1
19_Member	GO Biological Processes	GO:0043648	dicarboxylic acid metabolic process	-4.08319	-1.56301	13/98	1719,2356,2806,3417,4199,5264,7915,10840,23498,79944,80017,112817,122970	DHFR,FPGS,GOT2,IDH1,ME1,PHYH,ALDH5A1,ALDH1L1,HAAO,L2HGDH,DGLUCY,HOGA1,ACOT4
19_Member	GO Biological Processes	GO:0042219	cellular modified amino acid catabolic process	-2.87539	-0.847198	6/33	33,1735,2806,10840,51449,112817	ACADL,DIO3,GOT2,ALDH1L1,PCYOX1,HOGA1
19_Member	GO Biological Processes	GO:0006103	2-oxoglutarate metabolic process	-2.58939	-0.697274	4/16	2806,3417,5264,79944	GOT2,IDH1,PHYH,L2HGDH
19_Member	GO Biological Processes	GO:0046487	glyoxylate metabolic process	-2.27526	-0.511063	3/10	2806,3417,112817	GOT2,IDH1,HOGA1
19_Member	Reactome Gene Sets	R-HSA-389661	Glyoxylate metabolism and glycine degradation	-2.24028	-0.490622	5/31	2731,2806,54363,55526,112817	GLDC,GOT2,HAO1,DHTKD1,HOGA1
20_Summary	GO Biological Processes	GO:0006805	xenobiotic metabolic process	-4.06562	-1.55188	15/126	9,30,570,1549,1555,1559,1573,2180,2938,2939,23491,29104,54575,54578,54659,1890,6241,6652,7371,7498,79799,55347,890,1393,5138,1373,1621,2806,4929,9456,63826,231,57016,6783,6822,10380,64180,66002,84532,5959,8854,3293,6718	NAT1,ACAA1,BAAT,CYP2A7,CYP2B6,CYP2C9,CYP2J2,ACSL1,GSTA1,GSTA2,CES3,N6AMT1,UGT1A10,UGT1A6,UGT1A3,TYMP,RRM2,SORD,UCK2,XDH,UGT2A3,ABHD10,CCNA2,CRHBP,PDE2A,CPS1,DBH,GOT2,NR4A2,HOMER1,SRR,AKR1B1,AKR1B10,SULT1E1,SULT2A1,BPNT1,DPEP3,CYP4F12,ACSS1,RDH5,ALDH1A2,HSD17B3,AKR1D1
20_Member	GO Biological Processes	GO:0006805	xenobiotic metabolic process	-4.06562	-1.55188	15/126	9,30,570,1549,1555,1559,1573,2180,2938,2939,23491,29104,54575,54578,54659	NAT1,ACAA1,BAAT,CYP2A7,CYP2B6,CYP2C9,CYP2J2,ACSL1,GSTA1,GSTA2,CES3,N6AMT1,UGT1A10,UGT1A6,UGT1A3
20_Member	KEGG Pathway	hsanan01	drug metabolism	-3.8583	-1.40578	14/117	9,1555,1559,1890,2938,2939,6241,6652,7371,7498,54575,54578,54659,79799	NAT1,CYP2B6,CYP2C9,TYMP,GSTA1,GSTA2,RRM2,SORD,UCK2,XDH,UGT1A10,UGT1A6,UGT1A3,UGT2A3
20_Member	GO Biological Processes	GO:0006063	uronic acid metabolic process	-3.77552	-1.34834	6/23	6652,54575,54578,54659,55347,79799	SORD,UGT1A10,UGT1A6,UGT1A3,ABHD10,UGT2A3
20_Member	GO Biological Processes	GO:0019585	glucuronate metabolic process	-3.77552	-1.34834	6/23	6652,54575,54578,54659,55347,79799	SORD,UGT1A10,UGT1A6,UGT1A3,ABHD10,UGT2A3
20_Member	GO Biological Processes	GO:0071466	cellular response to xenobiotic stimulus	-3.72902	-1.31726	18/181	9,30,570,890,1393,1549,1555,1559,1573,2180,2938,2939,5138,23491,29104,54575,54578,54659	NAT1,ACAA1,BAAT,CCNA2,CRHBP,CYP2A7,CYP2B6,CYP2C9,CYP2J2,ACSL1,GSTA1,GSTA2,PDE2A,CES3,N6AMT1,UGT1A10,UGT1A6,UGT1A3
20_Member	GO Biological Processes	GO:0009410	response to xenobiotic stimulus	-3.62731	-1.30037	24/285	9,30,570,890,1373,1393,1549,1555,1559,1573,1621,2180,2806,2938,2939,4929,5138,9456,23491,29104,54575,54578,54659,63826	NAT1,ACAA1,BAAT,CCNA2,CPS1,CRHBP,CYP2A7,CYP2B6,CYP2C9,CYP2J2,DBH,ACSL1,GOT2,GSTA1,GSTA2,NR4A2,PDE2A,HOMER1,CES3,N6AMT1,UGT1A10,UGT1A6,UGT1A3,SRR
20_Member	KEGG Pathway	ko00040	Pentose and glucuronate interconversions	-3.62211	-1.30037	7/34	231,6652,54575,54578,54659,57016,79799	AKR1B1,SORD,UGT1A10,UGT1A6,UGT1A3,AKR1B10,UGT2A3
20_Member	KEGG Pathway	hsa00040	Pentose and glucuronate interconversions	-3.53951	-1.2642	7/35	231,6652,54575,54578,54659,57016,79799	AKR1B1,SORD,UGT1A10,UGT1A6,UGT1A3,AKR1B10,UGT2A3
20_Member	KEGG Pathway	hsa00983	Drug metabolism - other enzymes	-3.52767	-1.2642	8/46	9,1890,7371,7498,54575,54578,54659,79799	NAT1,TYMP,UCK2,XDH,UGT1A10,UGT1A6,UGT1A3,UGT2A3
20_Member	KEGG Pathway	ko00983	Drug metabolism - other enzymes	-3.52767	-1.2642	8/46	9,1890,7371,7498,54575,54578,54659,79799	NAT1,TYMP,UCK2,XDH,UGT1A10,UGT1A6,UGT1A3,UGT2A3
20_Member	Reactome Gene Sets	R-HSA-211859	Biological oxidations	-3.49721	-1.23732	20/222	9,1549,1555,1559,1573,2938,2939,6783,6822,10380,23491,29104,54575,54578,54659,55347,64180,66002,79799,84532	NAT1,CYP2A7,CYP2B6,CYP2C9,CYP2J2,GSTA1,GSTA2,SULT1E1,SULT2A1,BPNT1,CES3,N6AMT1,UGT1A10,UGT1A6,UGT1A3,ABHD10,DPEP3,CYP4F12,UGT2A3,ACSS1
20_Member	GO Biological Processes	GO:0052695	cellular glucuronidation	-3.36092	-1.13524	5/18	54575,54578,54659,55347,79799	UGT1A10,UGT1A6,UGT1A3,ABHD10,UGT2A3
20_Member	Reactome Gene Sets	R-HSA-156580	Phase II - Conjugation of compounds	-3.0613	-0.960555	12/109	9,2938,2939,6783,6822,10380,29104,54575,54578,54659,55347,79799	NAT1,GSTA1,GSTA2,SULT1E1,SULT2A1,BPNT1,N6AMT1,UGT1A10,UGT1A6,UGT1A3,ABHD10,UGT2A3
20_Member	KEGG Pathway	ko00980	Metabolism of xenobiotics by cytochrome P450	-2.72853	-0.761471	9/74	1555,1559,2938,2939,6822,54575,54578,54659,79799	CYP2B6,CYP2C9,GSTA1,GSTA2,SULT2A1,UGT1A10,UGT1A6,UGT1A3,UGT2A3
20_Member	Reactome Gene Sets	R-HSA-156588	Glucuronidation	-2.66391	-0.740899	5/25	54575,54578,54659,55347,79799	UGT1A10,UGT1A6,UGT1A3,ABHD10,UGT2A3
20_Member	KEGG Pathway	hsa00980	Metabolism of xenobiotics by cytochrome P450	-2.64733	-0.725959	9/76	1555,1559,2938,2939,6822,54575,54578,54659,79799	CYP2B6,CYP2C9,GSTA1,GSTA2,SULT2A1,UGT1A10,UGT1A6,UGT1A3,UGT2A3
20_Member	KEGG Pathway	ko00830	Retinol metabolism	-2.5151	-0.655985	8/65	1555,1559,5959,8854,54575,54578,54659,79799	CYP2B6,CYP2C9,RDH5,ALDH1A2,UGT1A10,UGT1A6,UGT1A3,UGT2A3
20_Member	KEGG Pathway	M00014	Glucuronate pathway (uronate pathway)	-2.50936	-0.653059	5/27	6652,54575,54578,54659,79799	SORD,UGT1A10,UGT1A6,UGT1A3,UGT2A3
20_Member	KEGG Pathway	hsa_M00014	Glucuronate pathway (uronate pathway)	-2.50936	-0.653059	5/27	6652,54575,54578,54659,79799	SORD,UGT1A10,UGT1A6,UGT1A3,UGT2A3
20_Member	KEGG Pathway	hsa00830	Retinol metabolism	-2.43243	-0.607314	8/67	1555,1559,5959,8854,54575,54578,54659,79799	CYP2B6,CYP2C9,RDH5,ALDH1A2,UGT1A10,UGT1A6,UGT1A3,UGT2A3
20_Member	KEGG Pathway	ko05204	Chemical carcinogenesis	-2.42112	-0.603063	9/82	9,1559,2938,2939,6822,54575,54578,54659,79799	NAT1,CYP2C9,GSTA1,GSTA2,SULT2A1,UGT1A10,UGT1A6,UGT1A3,UGT2A3
20_Member	GO Biological Processes	GO:0052696	flavonoid glucuronidation	-2.41784	-0.603063	3/9	54575,54578,54659	UGT1A10,UGT1A6,UGT1A3
20_Member	KEGG Pathway	hsa00982	Drug metabolism - cytochrome P450	-2.31479	-0.537904	8/70	1555,1559,2938,2939,54575,54578,54659,79799	CYP2B6,CYP2C9,GSTA1,GSTA2,UGT1A10,UGT1A6,UGT1A3,UGT2A3
20_Member	KEGG Pathway	ko00982	Drug metabolism - cytochrome P450	-2.31479	-0.537904	8/70	1555,1559,2938,2939,54575,54578,54659,79799	CYP2B6,CYP2C9,GSTA1,GSTA2,UGT1A10,UGT1A6,UGT1A3,UGT2A3
20_Member	KEGG Pathway	ko00140	Steroid hormone biosynthesis	-2.21549	-0.475115	7/58	3293,6718,6783,54575,54578,54659,79799	HSD17B3,AKR1D1,SULT1E1,UGT1A10,UGT1A6,UGT1A3,UGT2A3
20_Member	KEGG Pathway	hsa05204	Chemical carcinogenesis	-2.18604	-0.456781	9/89	9,1559,2938,2939,6822,54575,54578,54659,79799	NAT1,CYP2C9,GSTA1,GSTA2,SULT2A1,UGT1A10,UGT1A6,UGT1A3,UGT2A3
20_Member	GO Biological Processes	GO:0052697	xenobiotic glucuronidation	-2.14925	-0.439673	3/11	54575,54578,54659	UGT1A10,UGT1A6,UGT1A3
20_Member	KEGG Pathway	hsa00140	Steroid hormone biosynthesis	-2.09603	-0.410637	7/61	3293,6718,6783,54575,54578,54659,79799	HSD17B3,AKR1D1,SULT1E1,UGT1A10,UGT1A6,UGT1A3,UGT2A3
