# Supplementary material for: Combined Analysis of Expression Profiles in a Mouse Model and Patients Identified BHMT2 as a New Regulator of Lipid Metabolism in Metabolic-Associated Fatty Liver Disease
Source: Front Cell Dev Biol. 2021 Nov 11;9:741710. doi: 10.3389/fcell.2021.741710 (PMC8636031; doi:10.3389/fcell.2021.741710)
Supplement: Supplementary file 5 [file Table4.XLSX]

## Sheet: Sheet1
Table S4.The 4 most significant MCODE components form the PPI network of overlapping genes.
NO	GO	Description	Log10(P)
MCODE 1	ko00830	Retinol metabolism	-15.92
MCODE 1	R-HSA-211945	Phase I - Functionalization of compounds	-11.38
MCODE 1	WP2875	Constitutive Androstane Receptor Pathway	-10.69
MCODE 2	GO:0051301	cell division	-6.69
MCODE 2	GO:0010564	regulation of cell cycle process	-4.07
