# Supplementary material for: Combined Analysis of Expression Profiles in a Mouse Model and Patients Identified BHMT2 as a New Regulator of Lipid Metabolism in Metabolic-Associated Fatty Liver Disease
Source: Front Cell Dev Biol. 2021 Nov 11;9:741710. doi: 10.3389/fcell.2021.741710 (PMC8636031; doi:10.3389/fcell.2021.741710)
Supplement: Supplementary file 6 [file Table1.XLSX]

## Sheet: Sheet1
Table S1.RNAseq data of liver tissues of FXR-KO mice and controls
Gene_ID	Symbol	c1gan	c2gan	c3gan	ko1gan	ko2gan	ko3gan	G1	G2	G2_vs_G1_log2FoldChange	G2_vs_G1_Pvalue	G2_vs_G1_FDR
ENSMUSG00000028180	Zranb2	9.95217	9.50238	9.77178	10.0326	9.2688	9.37611	9.74211	9.55919	-0.18292	0.409669	0.817413
ENSMUSG00000028182	Lrriq3	4.38715	5.19045	5.64399	6.69477	5.82732	5.19995	5.07387	5.90735	0.833481	0.076642	0.394247
ENSMUSG00000028185	Dnase2b	10.9012	10.2586	10.7719	10.8156	11.0626	9.88658	10.6439	10.5883	-0.0556412	0.998665	0.999468
ENSMUSG00000028184	Adgrl2	10.5152	11.2125	11.3896	11.8973	11.4878	11.7169	11.0391	11.7007	0.661581	0.000368551	0.00754936
ENSMUSG00000028187	Rpf1	10.0183	9.84843	9.80987	9.61403	9.74516	9.71647	9.89221	9.69189	-0.200326	0.0934618	0.443081
ENSMUSG00000028186	Uox	16.6165	16.4562	16.2671	15.9777	16.0235	15.9459	16.4466	15.9824	-0.464225	1.12e-05	0.00040833
ENSMUSG00000028189	Ctbs	8.82219	9.33962	9.24526	9.45742	9.04458	9.07506	9.13569	9.19235	0.0566636	0.785554	0.941328
ENSMUSG00000028188	Spata1	5.03913	5.33347	4.5407	5.17689	4.57092	4.23868	4.9711	4.66216	-0.308937	0.608979	0.855734
ENSMUSG00000070074	Mir484	0	1.18169	0	1.97497	0	0	0.393897	0.658323	0.264425	0.776686	0.938311
ENSMUSG00000020755	Sap30bp	9.21939	9.38959	8.66676	9.02998	9.31078	8.85754	9.09191	9.0661	-0.0258129	0.815946	0.951271
ENSMUSG00000020752	Recql5	7.26452	8.31337	8.20471	8.52695	8.10511	8.06173	7.92753	8.23127	0.303735	0.341062	0.817413
ENSMUSG00000020758	Itgb4	5.5696	4.4959	5.10485	5.82509	4.8238	4.07827	5.05678	4.90906	-0.147729	0.966291	0.991642
ENSMUSG00000069833	Ahnak	9.44511	9.32543	9.04385	9.77714	9.51313	8.85134	9.27146	9.38054	0.109075	0.449427	0.817413
ENSMUSG00000069830	Nlrp1a	0	0	3.30888	0	0	0	1.10296	0	-1.10296	0.417984	0.817413
ENSMUSG00000028238	Atp6v0d2	5.52867	5.4215	6.52868	8.57209	8.6211	8.14509	5.82628	8.44609	2.61981	2.73e-19	7.72e-17
ENSMUSG00000033862	Cdk10	8.08029	7.84916	7.73961	7.59241	8.28437	8.05097	7.88969	7.97591	0.0862289	0.631828	0.868064
ENSMUSG00000003269	Cyth2	9.60622	9.93697	9.47033	9.32193	9.38635	8.97039	9.67118	9.22622	-0.444951	0.00636553	0.0700602
ENSMUSG00000033860	Fgg	18.0855	17.8669	18.0192	17.6114	17.7174	17.6509	17.9905	17.6599	-0.330622	0.000528436	0.0101428
ENSMUSG00000069835	Sat2	7.62639	7.8412	7.2204	8.0165	7.76349	7.28492	7.56266	7.6883	0.125639	0.585564	0.840723
ENSMUSG00000028233	Tgs1	8.79656	8.85	9.28958	8.5497	8.68634	9.11696	8.97871	8.78433	-0.194383	0.285329	0.783467
ENSMUSG00000028232	Tmem68	8.62273	8.91589	8.77709	8.23576	7.99355	8.07242	8.7719	8.10058	-0.671326	9.33e-05	0.00242613
ENSMUSG00000028236	Sdr16c5	0	3.30436	4.14618	5.34238	4.57092	0	2.48351	3.30443	0.82092	0.294911	0.792351
ENSMUSG00000028234	Rps20	10.9122	11.4683	10.7185	10.7008	11.2856	11.0175	11.033	11.0013	-0.0317189	0.761385	0.932832
ENSMUSG00000044534	Ackr2	3.1651	6.799	6.66159	4.4275	6.43259	5.54503	5.5419	5.46837	-0.0735231	0.617952	0.860397
ENSMUSG00000068120	Gm10231	7.85878	8.16824	7.41184	8.0488	7.92762	8.14509	7.81296	8.0405	0.227548	0.39777	0.817413
ENSMUSG00000046020	Pofut1	9.05618	9.13351	9.42897	9.26464	9.28732	9.3456	9.20622	9.29919	0.0929648	0.588551	0.843053
ENSMUSG00000075162	Gm10812	0	1.82247	3.46253	0	3.75725	0	1.76167	1.25242	-0.50925	0.989663	0.996232
ENSMUSG00000018209	Stk4	9.76001	9.96836	10.2454	9.9193	10.1249	10.1105	9.99125	10.0516	0.0603097	0.749107	0.92685
ENSMUSG00000097008	Gm26860	0	0	3.60139	0	0	0	1.20046	0	-1.20046	0.364019	0.817413
ENSMUSG00000083761	Pgam1-ps1	1.21929	1.82247	1.0798	1.97497	1.71227	1.57846	1.37385	1.75523	0.381377	0.802755	0.947686
ENSMUSG00000044285	Gm1821	11.6042	11.7201	11.3114	11.4996	11.4688	11.5785	11.5453	11.5156	-0.0296144	0.708998	0.908051
ENSMUSG00000112135	RP23-468J15.4	4.19127	4.57481	2.71561	3.49303	4.42564	3.45056	3.82723	3.78974	-0.0374856	0.862222	0.968135
ENSMUSG00000006958	Chrd	6.23623	6.69686	6.24071	6.65336	7.20799	6.05647	6.39127	6.63927	0.248004	0.360039	0.817413
ENSMUSG00000087574	C030037D09Rik	4.63865	4.12842	4.31713	5.2893	5.57511	4.07827	4.3614	4.9809	0.619495	0.201637	0.669779
ENSMUSG00000087579	1500017E21Rik	11.9607	11.7087	12.0388	10.8446	11.5009	11.4223	11.9027	11.2559	-0.646809	2.41e-05	0.000787927
ENSMUSG00000087578	Ccdc142os	0	0	0	0	3.98175	3.16125	0	2.381	2.381	0.117887	0.505421
ENSMUSG00000058569	Tmed9	10.5191	10.6636	10.9334	10.4877	10.5994	10.5265	10.7054	10.5379	-0.167522	0.139892	0.557811
ENSMUSG00000058567	Gm2531	2.6584	0	2.1181	1.30194	1.09651	0	1.59217	0.799484	-0.792683	0.547271	0.820333
ENSMUSG00000021583	Erap1	12.3612	12.2427	12.6502	12.1706	12.1681	12.2649	12.418	12.2012	-0.216805	0.0381254	0.250692
ENSMUSG00000073867	AA474408	5.09627	5.37815	5.32124	4.98994	4.88065	4.94475	5.26522	4.93845	-0.326776	0.483637	0.817413
ENSMUSG00000021585	Cast	11.1314	11.3309	11.392	11.2368	11.144	11.1633	11.2847	11.1814	-0.103356	0.286976	0.784248
ENSMUSG00000021589	Rhobtb3	7.58706	7.896	7.36387	7.32868	8.09914	8.41233	7.61565	7.94671	0.331068	0.16333	0.604065
ENSMUSG00000097309	Gm17249	3.69543	3.90233	3.30888	3.49303	0	0	3.63555	1.16434	-2.4712	0.240031	0.727925
ENSMUSG00000030889	Vwa3a	1.21929	0	0	2.4321	0	0	0.406432	0.810701	0.404269	0.69148	0.900865
ENSMUSG00000030888	Rrp8	8.84738	9.191	9.25581	8.84465	8.79015	8.90015	9.09806	8.84498	-0.253079	0.0862716	0.424122
ENSMUSG00000086191	Zfp652os	0	0	1.69041	0	3.16489	0	0.56347	1.05496	0.491492	0.604509	0.853029
ENSMUSG00000030881	Arfip2	8.65637	8.58996	8.34967	8.98479	8.57016	8.38687	8.532	8.64727	0.115272	0.488327	0.817413
ENSMUSG00000026753	Ppp6c	9.86649	10.7638	9.9818	10.8026	10.6927	10.8782	10.204	10.7912	0.587122	0.00472588	0.0562969
ENSMUSG00000026750	Psmb7	12.5362	12.3685	12.2924	12.3531	12.5035	12.3359	12.399	12.3975	-0.00152323	0.948408	0.988312
ENSMUSG00000030884	Uqcrc2	13.6088	13.7088	13.4134	13.6679	13.6296	13.6472	13.577	13.6483	0.0712854	0.53715	0.820333
ENSMUSG00000026754	Golga1	8.64205	8.69525	8.9943	8.66878	9.34402	8.98178	8.7772	8.99819	0.220992	0.204243	0.674714
ENSMUSG00000026755	Arpc5l	9.84373	9.61167	9.5389	9.97499	10.0525	9.74012	9.66477	9.92254	0.257776	0.0588564	0.334026
ENSMUSG00000007338	Mrpl49	9.21939	9.47178	8.84855	9.35459	9.51538	9.24999	9.1799	9.37332	0.193417	0.308322	0.803925
ENSMUSG00000074846	Gm10774	4.91759	4.41243	4.5407	4.09774	5.08801	5.54503	4.62357	4.91026	0.286689	0.517851	0.817413
ENSMUSG00000075833	Gm22003	0	1.18169	0	0	0	0	0.393897	0	-0.393897	0.55464	0.820333
ENSMUSG00000086224	2700069I18Rik	0	2.26462	0	0	0	0	0.754874	0	-0.754874	0.482514	0.817413
ENSMUSG00000086228	Ubap1l	0	0	0	2.4321	0	0	0	0.810701	0.810701	0.462958	0.817413
ENSMUSG00000003824	Syce2	5.48655	6.8315	5.32124	6.88567	6.5772	5.8233	5.87976	6.42872	0.548961	0.311438	0.80674
ENSMUSG00000081643	Gm11605	7.88334	7.22309	7.53824	7.73817	7.34562	7.15018	7.54822	7.41132	-0.136902	0.58679	0.841796
ENSMUSG00000081642	Gm13532	0	2.26462	0	0	0	0	0.754874	0	-0.754874	0.482514	0.817413
ENSMUSG00000081640	Rplp0-ps1	2.31759	1.82247	1.69041	2.4321	2.74241	3.16125	1.94349	2.77859	0.835098	0.481781	0.817413
ENSMUSG00000081648	Gm13423	3.36433	5.46357	4.73423	4.98994	4.50011	4.84855	4.52071	4.77953	0.258821	0.968232	0.991642
ENSMUSG00000004446	Bid	8.72591	8.73874	8.93972	8.93814	8.86603	8.62326	8.80145	8.80914	0.00768623	0.947577	0.988058
ENSMUSG00000098550	Mir7079	1.21929	0	0	0	0	0	0.406432	0	-0.406432	0.552776	0.820333
ENSMUSG00000098557	Kctd12	9.61113	8.71716	0	0	0	8.99307	6.10943	2.99769	-3.11174	0.751008	0.928002
ENSMUSG00000028937	Acot7	10.2278	9.63257	9.61053	9.41159	9.84854	9.76997	9.82363	9.6767	-0.146937	0.340605	0.817413
ENSMUSG00000108628	Gm5037	1.21929	0	2.44757	0	2.14245	2.31412	1.22229	1.48553	0.263237	0.88999	0.975767
ENSMUSG00000089417	Gm22009	8.45266	7.34065	5.93409	6.77418	7.58682	6.83581	7.24247	7.0656	-0.176864	0.517483	0.817413
ENSMUSG00000085884	Gm15342	0	3.77445	0	0	0	0	1.25815	0	-1.25815	0.330024	0.817413
ENSMUSG00000085887	Arhgap27os3	0	0	3.46253	1.97497	0	0	1.15418	0.658323	-0.495856	0.589099	0.843414
ENSMUSG00000085886	D030047H15Rik	2.31759	0	0	0	0	0	0.77253	0	-0.77253	0.481172	0.817413
ENSMUSG00000085881	Gm15912	2.6584	0	0	0	0	0	0.886133	0	-0.886133	0.469268	0.817413
ENSMUSG00000085880	Gm15229	0	0	0	0	0	4.23868	0	1.41289	1.41289	0.242704	0.731465
ENSMUSG00000085882	2610507I01Rik	6.76281	7.01247	7.33431	6.18615	7.62059	6.49814	7.03653	6.76829	-0.268237	0.692454	0.901241
ENSMUSG00000085889	1700054M17Rik	0	0	0	0	3.49126	0	0	1.16375	1.16375	0.369684	0.817413
ENSMUSG00000029919	Hpgds	3.1651	4.12842	3.13688	5.11723	4.08213	3.89778	3.4768	4.36571	0.88891	0.223532	0.703269
ENSMUSG00000029918	Mrps33	8.81795	8.77261	8.60621	8.72982	8.89392	8.96467	8.73226	8.8628	0.130545	0.416356	0.817413
ENSMUSG00000029915	Clec5a	3.53936	0	0	2.4321	0	0	1.17979	0.810701	-0.369086	0.670696	0.890832
ENSMUSG00000029916	Agk	6.69044	7.23529	7.04899	7.39299	7.16286	7.08834	6.99157	7.21473	0.223157	0.426192	0.817413
ENSMUSG00000029911	Ssbp1	8.89646	9.07364	8.91663	9.83152	9.3566	9.52747	8.96224	9.57186	0.60962	8.08e-05	0.00215784
ENSMUSG00000029910	Mad2l1	5.95659	6.31547	6.93544	6.79337	6.88573	6.64854	6.4025	6.77588	0.373383	0.332045	0.817413
ENSMUSG00000029913	Prdm5	2.31759	1.82247	4.46996	4.09774	3.98175	0	2.87	2.69316	-0.17684	0.884161	0.973703
ENSMUSG00000077549	Snord71	0	0	2.1181	0	0	0	0.706034	0	-0.706034	0.488434	0.817413
ENSMUSG00000070527	Mkrn3	3.83626	3.47864	2.71561	0	0	0	3.3435	0	-3.3435	0.0384625	0.251935
ENSMUSG00000077545	Gm22018	0	0	0	0	3.16489	0	0	1.05496	1.05496	0.431598	0.817413
ENSMUSG00000084686	Gm22027	1.87053	2.8762	1.69041	0	0	0	2.14571	0	-2.14571	0.239592	0.727534
ENSMUSG00000095105	Edaradd	2.93388	3.10611	0	0	0	0	2.01333	0	-2.01333	0.234782	0.720533
ENSMUSG00000035273	Hpse	6.9604	7.16051	7.38325	6.65336	7.47125	7.33902	7.16806	7.15454	-0.0135122	0.962234	0.991182
ENSMUSG00000043263	Ifi209	6.18447	5.98078	6.67738	4.52256	4.98805	5.19995	6.28088	4.90352	-1.37735	0.000852329	0.0148848
ENSMUSG00000043262	Uevld	8.7439	8.76842	8.58544	8.58316	8.57877	8.69416	8.69925	8.6187	-0.0805539	0.576554	0.833651
ENSMUSG00000043267	Olfr1031	0	0	1.0798	1.97497	0	0	0.359933	0.658323	0.298389	0.749042	0.92685
ENSMUSG00000035279	Ssc5d	0	0	0	2.4321	0	3.69143	0	2.04118	2.04118	0.196343	0.661421
ENSMUSG00000035278	Plekhj1	7.99272	8.80978	8.19925	8.59961	8.17497	8.37828	8.33392	8.38429	0.0503691	0.962115	0.991182
ENSMUSG00000044533	Rps2	13.6183	13.2	13.3714	13.2063	13.2368	13.3216	13.3966	13.2549	-0.141669	0.158862	0.595245
ENSMUSG00000034435	Tmem30b	10.6572	10.8246	10.8313	10.924	10.727	10.7724	10.7711	10.8078	0.0367529	0.763867	0.933795
ENSMUSG00000034437	Gm9761	5.75844	6.0376	5.43703	6.6322	5.39168	6.05647	5.74436	6.02678	0.282425	0.416683	0.817413
ENSMUSG00000034430	Zxdc	10.1708	9.46143	9.66697	9.52212	9.21731	9.49606	9.76638	9.41183	-0.354555	0.0280694	0.202036
ENSMUSG00000034432	Cops8	9.04534	9.58094	9.32508	9.42396	9.52433	9.72665	9.31712	9.55831	0.241189	0.163045	0.603401
ENSMUSG00000034438	Gbp8	5.64813	5.03169	6.38227	5.70863	5.64242	5.54503	5.68736	5.63202	-0.055336	0.712982	0.910139
ENSMUSG00000083482	Gm14706	0	0	0	1.97497	2.4734	2.31412	0	2.25416	2.25416	0.21806	0.695335
ENSMUSG00000083481	Rps8-ps2	4.08236	4.64962	4.31713	4.21623	4.50011	4.38302	4.3497	4.36645	0.0167507	0.999194	0.99951
ENSMUSG00000023057	Fabp2	10.2484	10.0466	9.36949	9.87945	10.1797	9.80883	9.88816	9.95601	0.0678433	0.878905	0.972383
ENSMUSG00000102912	Gm20731	2.31759	3.90233	0	2.4321	0	3.69143	2.07331	2.04118	-0.0321309	0.913326	0.9769
ENSMUSG00000053916	Nanp	8.47437	8.55146	8.7844	8.23576	8.30008	7.97327	8.60341	8.1697	-0.433706	0.0159516	0.134857
ENSMUSG00000017723	Wfdc2	5.03913	6.0376	5.39946	4.21623	6.41345	6.21918	5.49206	5.61629	0.124228	0.524992	0.820333
ENSMUSG00000017721	Pigt	11.5387	11.2094	11.4919	11.2612	11.6982	11.5971	11.4133	11.5188	0.105486	0.40569	0.817413
ENSMUSG00000110899	RP23-284E19.10	6.63367	7.60784	7.8412	8.02464	5.18149	7.47411	7.3609	6.89341	-0.467492	0.855597	0.966207
ENSMUSG00000095335	Igkv3-5	2.31759	0	0	0	0	0	0.77253	0	-0.77253	0.481172	0.817413
ENSMUSG00000015474	Ppt2	10.0922	10.074	10.4127	10.1508	10.4454	10.615	10.193	10.4037	0.210797	0.13837	0.553675
ENSMUSG00000011267	Zfp296	2.31759	4.32383	2.71561	4.32573	4.93535	3.16125	3.11901	4.14078	1.02177	0.278441	0.775104
ENSMUSG00000078816	Prkcg	0	2.26462	0	0	0	0	0.754874	0	-0.754874	0.482514	0.817413
ENSMUSG00000078817	Nlrp12	10.5424	11.1631	10.9161	10.4639	10.0133	10.2322	10.8738	10.2365	-0.637359	3.91e-05	0.00118055
ENSMUSG00000078815	Cacng6	0	0	0	0	1.71227	0	0	0.570755	0.570755	0.488149	0.817413
ENSMUSG00000078812	Eif5a	13.4274	13.1753	13.0672	13.4177	13.3652	13.2448	13.2233	13.3426	0.119279	0.315491	0.811328
ENSMUSG00000015478	Rnf5	10.8471	11.0725	10.6857	10.9445	11.0174	10.9895	10.8684	10.9838	0.115386	0.38855	0.817413
ENSMUSG00000078810	Gp6	4.19127	0	0	4.85032	0	0	1.39709	1.61677	0.219683	0.855471	0.966115
ENSMUSG00000099759	1700030C10Rik	2.6584	3.30436	4.67256	4.21623	4.63841	0	3.54511	2.95155	-0.593556	0.90601	0.975863
ENSMUSG00000048787	Dcun1d3	10.2563	10.3257	10.2936	9.98545	10.0541	10.5362	10.2919	10.1919	-0.0999595	0.540235	0.820333
ENSMUSG00000050296	Abca12	0	0	0	0	0	1.57846	0	0.526153	0.526153	0.506163	0.817413
ENSMUSG00000027405	Nop56	9.40043	9.27019	9.33009	9.11252	9.10548	8.68026	9.33357	8.96608	-0.367486	0.0221102	0.170526
ENSMUSG00000050295	Foxc1	3.53936	4.85327	0	4.85032	4.76461	2.79899	2.79754	4.13797	1.34043	0.536161	0.820333
ENSMUSG00000027404	Snrpb	10.5654	10.4007	10.1124	10.1582	10.4757	10.3312	10.3595	10.3217	-0.0377864	0.735089	0.921725
ENSMUSG00000093507	Gm20627	0	2.26462	3.46253	3.05797	3.63038	0	1.90905	2.22945	0.320396	0.779942	0.939654
ENSMUSG00000093505	Gm20691	1.87053	0	0	1.97497	1.71227	2.31412	0.623509	2.00045	1.37694	0.507841	0.817413
ENSMUSG00000050299	Gm9843	9.84997	9.38138	9.56459	9.89951	9.84854	9.40599	9.59865	9.71801	0.119369	0.443972	0.817413
ENSMUSG00000027406	Idh3b	12.2023	12.2064	12.0854	12.3515	12.3271	12.385	12.1647	12.3545	0.189833	0.0373188	0.246991
ENSMUSG00000097617	Gm10687	2.31759	0	0	0	2.4734	0	0.77253	0.824466	0.0519359	0.945388	0.987359
ENSMUSG00000097616	1110019D14Rik	4.47595	0	5.54422	5.62541	5.0389	5.1198	3.34006	5.26137	1.92131	0.348517	0.817413
ENSMUSG00000097615	Gm2061	4.7136	4.0198	2.44757	4.21623	3.98175	4.74549	3.72699	4.31449	0.587499	0.650705	0.87904
ENSMUSG00000097613	Gm17597	0	0	2.71561	3.49303	2.96906	0	0.905204	2.15403	1.24883	0.462748	0.817413
ENSMUSG00000112028	RP23-282P18.5	3.53936	0	0	3.49303	0	0	1.17979	1.16434	-0.0154438	0.989364	0.996232
ENSMUSG00000041130	Zfp598	11.1989	11.2369	11.5024	11.2672	11.2657	11.3014	11.3128	11.2781	-0.0346667	0.671758	0.891558
ENSMUSG00000041133	Smc1a	10.877	10.8674	11.3006	10.99	10.8226	10.9247	11.015	10.9124	-0.102595	0.350701	0.817413
ENSMUSG00000112023	Lilr4b	5.48655	4.72075	5.76712	5.23419	4.42564	5.60515	5.3248	5.08833	-0.236476	0.63124	0.868022
ENSMUSG00000041134	Cyyr1	7.70196	7.49064	7.86896	8.29755	7.57825	7.89114	7.68719	7.92231	0.235128	0.281571	0.778508
ENSMUSG00000112026	RP23-318O7.2	0	0	0	0	2.14245	0	0	0.714151	0.714151	0.470548	0.817413
ENSMUSG00000112027	RP24-211K19.6	3.1651	4.0198	3.84448	3.49303	3.16489	3.69143	3.67646	3.44978	-0.226679	0.742239	0.924479
ENSMUSG00000016921	Srsf6	11.6473	11.7723	11.7715	11.4566	11.3915	11.6902	11.7304	11.5128	-0.217571	0.0398018	0.258265
ENSMUSG00000027408	Cpxm1	3.69543	5.28735	1.69041	5.44302	3.33728	0	3.55773	2.92677	-0.630965	0.991836	0.996828
ENSMUSG00000037583	Nr0b2	8.67055	8.60884	9.26367	8.59961	8.91108	9.29175	8.84768	8.93414	0.0864584	0.723056	0.915637
ENSMUSG00000064923	Gm22042	0	0	0	0	1.09651	0	0	0.365505	0.365505	0.530725	0.820333
ENSMUSG00000058600	Rpl30	11.4497	11.4977	11.5013	11.5192	11.6417	11.692	11.4829	11.6176	0.134712	0.158768	0.595086
ENSMUSG00000058603	Rpl28-ps1	8.45266	8.05583	8.08555	8.29755	8.4248	8.27104	8.19801	8.33113	0.133117	0.505262	0.817413
ENSMUSG00000064927	Gm22043	3.96455	4.12842	2.1181	4.69572	3.87386	4.07827	3.40369	4.21595	0.812263	0.438147	0.817413
ENSMUSG00000058607	Rpl31-ps20	0	1.18169	0	0	0	0	0.393897	0	-0.393897	0.55464	0.820333
ENSMUSG00000090346	Vmn1r5	0	0	0	2.4321	0	0	0	0.810701	0.810701	0.462958	0.817413
ENSMUSG00000055401	Fbxo6	9.80783	9.99192	9.72697	10.2392	9.97957	10.025	9.84224	10.0813	0.239026	0.0713362	0.377226
ENSMUSG00000055407	Map6	2.31759	0	1.69041	2.77871	2.74241	0	1.336	1.84037	0.504374	0.659924	0.885112
ENSMUSG00000055409	Nell1	0	0	1.69041	0	0	0	0.56347	0	-0.56347	0.511179	0.817413
ENSMUSG00000051527	Usp29	0	0	0	0	2.4734	0	0	0.824466	0.824466	0.46085	0.817413
ENSMUSG00000095562	Gm21887	0	0	0	7.0057	0	0	0	2.33523	2.33523	0.428228	0.817413
ENSMUSG00000109165	Gm45148	0	2.8762	3.30888	0	0	0	2.06169	0	-2.06169	0.216713	0.693167
ENSMUSG00000109168	Gm44709	0	2.8762	0	0	0	0	0.958733	0	-0.958733	0.462641	0.817413
ENSMUSG00000040771	Oard1	9.21939	9.282	9.30236	9.47238	9.4131	9.64309	9.26792	9.50952	0.241608	0.0723181	0.3809
ENSMUSG00000040774	Cept1	11.1373	11.0363	10.7874	10.5067	10.5433	10.7855	10.987	10.6118	-0.375212	0.00217044	0.0309908
ENSMUSG00000111709	Gm3776	6.33449	6.09226	6.32329	7.17621	7.55223	7.71138	6.25002	7.47994	1.22993	5.35e-06	0.000211362
ENSMUSG00000056174	Col8a2	3.69543	3.47864	5.05739	3.66957	2.74241	4.63448	4.07715	3.68215	-0.394998	0.605597	0.853722
ENSMUSG00000103360	Gm38156	0	1.82247	3.13688	0	0	0	1.65312	0	-1.65312	0.319871	0.815331
ENSMUSG00000105804	Gm43654	4.19127	2.8762	3.30888	3.29184	0	2.79899	3.45878	2.03028	-1.42851	0.36882	0.817413
ENSMUSG00000105802	Gm43012	3.69543	0	0	3.49303	4.70289	5.54503	1.23181	4.58032	3.34851	0.028188	0.202671
ENSMUSG00000105801	C430019N01Rik	0	0	2.71561	0	0	0	0.905204	0	-0.905204	0.467025	0.817413
ENSMUSG00000057802	Gm10030	6.23623	6.74883	6.05985	6.00047	6.3744	6.01275	6.34831	6.12921	-0.2191	0.500327	0.817413
ENSMUSG00000105808	Gm42627	0	1.18169	0	1.97497	2.96906	2.31412	0.393897	2.41938	2.02549	0.234885	0.720533
ENSMUSG00000025269	Apex2	8.09438	8.91967	8.87274	8.13406	8.39095	8.61597	8.62893	8.38033	-0.248603	0.189689	0.650508
ENSMUSG00000025268	Maged2	7.62639	7.52084	7.1655	7.27508	7.62891	7.68377	7.43758	7.52925	0.0916771	0.719498	0.913458
ENSMUSG00000025266	Gnl3l	9.58642	8.98974	9.41727	9.63811	9.51762	9.6609	9.33114	9.60554	0.274403	0.109856	0.485557
ENSMUSG00000025265	Fgd1	5.25524	5.79552	6.08374	4.69572	5.35202	5.19995	5.7115	5.08257	-0.628932	0.156948	0.591758
ENSMUSG00000025264	Tsr2	8.51684	8.02103	8.12637	8.53837	8.45787	8.73509	8.22142	8.57711	0.355695	0.0714974	0.377815
ENSMUSG00000025261	Huwe1	13.2799	13.3458	13.0056	13.432	13.2013	13.4008	13.2104	13.3447	0.134261	0.266795	0.76078
ENSMUSG00000025260	Hsd17b10	11.8643	11.2942	11.3955	12.1494	12.4549	12.22	11.518	12.2747	0.756743	1.52e-07	8.68e-06
ENSMUSG00000091123	Gm17181	3.1651	0	0	0	2.14245	0	1.05503	0.714151	-0.340883	0.719791	0.913577
ENSMUSG00000094336	Gm13693	1.21929	1.18169	1.69041	1.30194	1.09651	0	1.3638	0.799484	-0.564315	0.769383	0.935685
ENSMUSG00000094338	Hist1h2bl	2.93388	2.8762	2.44757	2.77871	3.75725	2.79899	2.75255	3.11165	0.359099	0.664666	0.887205
ENSMUSG00000060131	Atp8b4	4.63865	5.50446	5.82495	6.00047	6.35446	5.92113	5.32269	6.09202	0.769335	0.0986831	0.456844
ENSMUSG00000047205	Dusp18	2.6584	0	0	0	3.49126	4.94475	0.886133	2.812	1.92587	0.140573	0.559257
ENSMUSG00000024725	Ostf1	10.2688	10.1387	10.1153	10.2145	10.4193	10.3664	10.1743	10.3334	0.15911	0.166767	0.609383
ENSMUSG00000001281	Itgb7	5.30457	4.0198	5.61149	5.39358	3.98175	4.63448	4.97862	4.66994	-0.308684	0.565253	0.824952
ENSMUSG00000097979	Gm4691	3.36433	4.22943	2.44757	3.05797	2.14245	0	3.34711	1.73347	-1.61364	0.263131	0.754917
ENSMUSG00000097970	Gm27028	1.87053	2.26462	3.72805	2.77871	0	0	2.62106	0.926237	-1.69483	0.398029	0.817413
ENSMUSG00000097971	Gm26917	15.2491	15.6703	14.9658	13.7211	13.3774	13.5621	15.295	13.5535	-1.74151	1.99e-30	1.17e-27
ENSMUSG00000067787	Blcap	9.26371	9.57375	9.56883	9.69534	9.49504	9.62506	9.46876	9.60514	0.136381	0.366637	0.817413
ENSMUSG00000097974	Gm10605	5.30457	5.46357	4.90484	5.58193	4.50011	7.17021	5.22433	5.75075	0.526424	0.114278	0.496301
ENSMUSG00000082609	Gm15464	3.83626	3.30436	2.71561	3.82684	3.87386	2.31412	3.28541	3.33827	0.0528649	0.85701	0.966515
ENSMUSG00000053279	Aldh1a1	15.7715	15.1427	15.3398	16.3027	16.3264	16.5126	15.418	16.3806	0.962551	2.8e-11	3.28e-09
ENSMUSG00000108022	Gm7298	4.29253	3.90233	7.01213	5.82509	5.91158	5.19995	5.069	5.64554	0.576546	0.890674	0.975784
ENSMUSG00000046490	Rnf222	0	4.0198	0	3.66957	2.74241	0	1.33993	2.13733	0.797392	0.914986	0.976908
ENSMUSG00000109836	Gm45884	8.58829	8.6864	9.03469	8.73479	8.60853	8.60129	8.76979	8.6482	-0.12159	0.416072	0.817413
ENSMUSG00000068324	Gm10029	6.04632	5.89112	6.01085	5.96706	6.33425	5.8233	5.98276	6.04153	0.0587706	0.820934	0.953607
ENSMUSG00000068329	Htra2	8.37397	8.11643	7.40237	8.03274	7.44322	7.85446	7.96426	7.77681	-0.187451	0.382033	0.817413
ENSMUSG00000068328	Aup1	11.7856	11.4022	11.5978	11.5729	11.8226	11.6155	11.5952	11.6704	0.0751462	0.560118	0.823631
ENSMUSG00000110070	Gm45619	0	0	0	4.09774	0	0	0	1.36591	1.36591	0.261085	0.751783
ENSMUSG00000106383	E330034L11Rik	3.53936	2.8762	3.60139	4.21623	2.14245	0	3.33898	2.11956	-1.21942	0.747624	0.926224
ENSMUSG00000099906	Gm28653	0	2.26462	0	0	0	0	0.754874	0	-0.754874	0.482514	0.817413
ENSMUSG00000064493	Snora28	3.36433	4.41243	4.23419	3.29184	2.74241	4.51422	4.00365	3.51616	-0.487494	0.619573	0.861096
ENSMUSG00000063442	Gm7117	0	0	1.0798	0	1.09651	0	0.359933	0.365505	0.00557177	0.981311	0.993964
ENSMUSG00000063445	Nmral1	6.8148	7.30638	7.41184	7.8974	7.15136	7.15018	7.17767	7.39964	0.221971	0.393587	0.817413
ENSMUSG00000063446	Plppr1	3.36433	3.30436	2.71561	1.30194	2.4734	0	3.1281	1.25844	-1.86966	0.237459	0.724549
ENSMUSG00000076940	Iglv2	0	1.82247	0	0	0	0	0.607489	0	-0.607489	0.504143	0.817413
ENSMUSG00000070522	Gm6505	5.44316	5.46357	5.54422	5.2893	6.06664	5.34803	5.48365	5.56799	0.0843387	0.748245	0.926391
ENSMUSG00000100975	Gm28875	4.29253	4.64962	4.9575	5.11723	4.57092	5.27589	4.63322	4.98801	0.354794	0.535483	0.820333
ENSMUSG00000092470	Gm20518	4.47595	0	0	0	0	0	1.49198	0	-1.49198	0.214652	0.689275
ENSMUSG00000092471	Cyp21a2-ps	3.1651	4.72075	4.31713	4.92181	4.42564	0	4.06766	3.11582	-0.951841	0.957076	0.99074
ENSMUSG00000019935	Slc17a8	9.33072	10.074	9.60022	9.49893	10.2542	10.2837	9.66831	10.0123	0.343984	0.0913824	0.437121
ENSMUSG00000060373	Hnrnpc	11.9404	11.9246	11.4321	11.2499	12.1834	12.1661	11.7657	11.8665	0.100788	0.682963	0.89686
ENSMUSG00000107596	Gm18913	2.31759	3.47864	3.13688	2.77871	2.14245	4.84855	2.9777	3.25657	0.278871	0.525863	0.820333
ENSMUSG00000070469	Adamtsl3	2.31759	2.8762	3.95221	0	2.74241	2.79899	3.04867	1.84713	-1.20153	0.439533	0.817413
ENSMUSG00000103779	Gm36931	0	0	1.0798	0	1.09651	0	0.359933	0.365505	0.00557177	0.981311	0.993964
ENSMUSG00000064145	Arih2	10.8081	10.6726	10.7118	10.6385	10.5088	10.6368	10.7308	10.5947	-0.136139	0.173787	0.6224
ENSMUSG00000020346	Mgat1	9.41454	9.04967	8.94625	9.32523	8.58734	9.18254	9.13682	9.0317	-0.105116	0.637175	0.871002
ENSMUSG00000064147	Rab44	2.31759	0	0	0	0	0	0.77253	0	-0.77253	0.481172	0.817413
ENSMUSG00000064141	Zfp69	5.89352	5.89112	4.39557	5.7873	4.70289	5.66285	5.3934	5.38435	-0.00905179	0.853024	0.965273
ENSMUSG00000107478	Gm45234	0	1.18169	0	0	0	0	0.393897	0	-0.393897	0.55464	0.820333
ENSMUSG00000107476	Zfp862-ps	8.1959	7.66306	7.98131	7.59241	8.14046	7.55253	7.94676	7.7618	-0.184958	0.46631	0.817413
ENSMUSG00000107470	Gm3375	7.20081	6.98384	6.43893	7.55916	7.38545	7.28492	6.87453	7.40984	0.535317	0.0599169	0.337448
ENSMUSG00000107472	Gm44265	2.31759	1.82247	0	0	0	0	1.38002	0	-1.38002	0.435318	0.817413
ENSMUSG00000054728	Phactr1	6.94493	6.74883	6.9485	6.77418	6.52466	6.83581	6.88076	6.71155	-0.169206	0.519921	0.818159
ENSMUSG00000054723	Vmac	8.03717	8.55633	7.67031	7.77725	8.42957	8.13493	8.08794	8.11392	0.0259799	0.994368	0.997777
ENSMUSG00000054720	Lrrc8c	8.73942	8.18091	8.88639	8.33732	8.14046	7.95028	8.60224	8.14269	-0.459554	0.0204436	0.160977
ENSMUSG00000054622	D730045B01Rik	0	3.10611	0	4.32573	3.75725	2.31412	1.03537	3.4657	2.43033	0.168838	0.613298
ENSMUSG00000036744	Olfr701	0	0	0	2.4321	3.75725	0	0	2.06312	2.06312	0.179194	0.632066
ENSMUSG00000036745	Ttll7	6.63367	5.23972	6.8955	6.40155	5.35202	5.77177	6.2563	5.84178	-0.414517	0.250003	0.740006
ENSMUSG00000036743	Psma8	3.69543	4.91523	3.95221	4.09774	3.63038	0	4.18762	2.57604	-1.61158	0.314389	0.81042
ENSMUSG00000099259	Mir6922	1.21929	1.18169	1.0798	1.30194	1.09651	1.57846	1.16026	1.32564	0.165375	0.910165	0.975863
ENSMUSG00000033510	Otud7a	2.6584	0	0	0	0	0	0.886133	0	-0.886133	0.469268	0.817413
ENSMUSG00000036748	Cuedc2	8.15615	7.57942	7.8129	8.33076	8.06275	8.02919	7.84949	8.1409	0.291412	0.187701	0.64748
ENSMUSG00000062797	Hikeshi	9.19997	9.00762	8.97846	9.67479	9.23377	9.28257	9.06202	9.39704	0.335026	0.0303678	0.213208
ENSMUSG00000062794	Zfp599	4.08236	4.57481	3.60139	4.61174	4.8238	4.23868	4.08619	4.55807	0.471886	0.491449	0.817413
ENSMUSG00000062421	Arf2	7.12046	7.70751	8.22633	8.11893	7.74829	7.93864	7.68477	7.93529	0.250521	0.487663	0.817413
ENSMUSG00000019066	Rab3d	8.85153	9.14326	8.89654	8.84465	8.56149	9.15264	8.96377	8.85293	-0.110848	0.540292	0.820333
ENSMUSG00000035498	Cdcp1	5.64813	6.09226	6.67738	7.5136	8.25241	8.33456	6.13925	8.03352	1.89427	5.82e-10	5.67e-08
ENSMUSG00000091462	Gm17084	3.96455	3.30436	5.39946	5.05498	3.63038	5.19995	4.22279	4.62844	0.405648	0.714062	0.910707
ENSMUSG00000055897	Ppp4r1l-ps	6.91348	6.89438	6.51117	6.32449	6.75498	6.59025	6.77301	6.55657	-0.216435	0.464473	0.817413
ENSMUSG00000108012	Gm44012	2.93388	1.82247	0	0	0	0	1.58545	0	-1.58545	0.350402	0.817413
ENSMUSG00000108018	Gm43928	3.53936	3.30436	3.95221	1.97497	0	4.38302	3.59864	2.11933	-1.47932	0.60787	0.855186
ENSMUSG00000097154	Gm26510	3.83626	0	0	0	1.71227	0	1.27875	0.570755	-0.707997	0.449257	0.817413
ENSMUSG00000097150	Gm26513	1.87053	0	0	3.96864	3.49126	3.16125	0.623509	3.54038	2.91687	0.0517124	0.307051
ENSMUSG00000097151	Gm26514	2.93388	3.47864	1.69041	2.77871	4.50011	0	2.70098	2.42627	-0.274704	0.667484	0.888786
ENSMUSG00000097152	Gm26515	3.69543	1.18169	3.46253	0	0	0	2.77989	0	-2.77989	0.0866326	0.425179
ENSMUSG00000097158	Gm26516	2.6584	2.60258	0	0	3.63038	3.89778	1.75366	2.50939	0.755727	0.441773	0.817413
ENSMUSG00000097159	Gm26517	2.6584	0	0	0	2.4734	0	0.886133	0.824466	-0.0616669	0.958152	0.99074
ENSMUSG00000112343	RP24-381P6.1	0	0	0	2.4321	0	0	0	0.810701	0.810701	0.462958	0.817413
ENSMUSG00000112342	RP24-134D11.2	1.21929	1.18169	0	1.30194	0	0	0.800329	0.433979	-0.36635	0.847426	0.964077
ENSMUSG00000031918	Mtmr2	9.86443	9.80409	10.1707	9.81987	9.84139	10.0084	9.9464	9.8899	-0.0564983	0.599491	0.849197
ENSMUSG00000112346	RP23-324E2.11	5.30457	4.78853	4.39557	4.92181	5.35202	5.8233	4.82955	5.36571	0.536157	0.304487	0.801356
ENSMUSG00000112349	RP24-286B23.3	0	0	1.0798	0	1.09651	0	0.359933	0.365505	0.00557177	0.981311	0.993964
ENSMUSG00000031916	Cog8	9.63784	9.76886	9.79367	9.96867	9.87151	9.98884	9.73345	9.94301	0.209551	0.0866355	0.425179
ENSMUSG00000031917	Nip7	8.88028	9.00762	8.99114	8.69453	9.05388	8.99307	8.95968	8.91382	-0.0458584	0.781314	0.940083
ENSMUSG00000031910	Has3	4.19127	4.0198	3.60139	3.29184	3.49126	0	3.93749	2.26103	-1.67645	0.281873	0.778966
ENSMUSG00000031913	Vps4a	9.79925	9.34807	9.63297	9.7156	9.70244	9.49606	9.59343	9.63803	0.0446019	0.803045	0.947797
ENSMUSG00000038637	Lrrc56	7.0499	7.02657	6.8264	6.921	7.19684	7.17021	6.96762	7.09602	0.128394	0.618066	0.860397
ENSMUSG00000038633	Degs1	11.232	11.2498	11.3458	11.1548	11.2684	11.3071	11.2759	11.2434	-0.0324225	0.703456	0.905363
ENSMUSG00000030359	Pzp	18.3328	18.3778	18.3617	17.806	17.9294	17.7826	18.3575	17.8393	-0.518132	2.06e-08	1.49e-06
ENSMUSG00000030357	Fkbp4	12.5226	12.4512	12.4324	12.8589	13.0791	12.6677	12.4687	12.8686	0.399854	0.000241321	0.00540313
ENSMUSG00000030353	Tead4	3.83626	3.30436	0	5.39358	2.14245	3.45056	2.38021	3.6622	1.28199	0.280372	0.776747
ENSMUSG00000030352	Tspan9	9.09875	9.48716	9.53023	9.4301	9.23649	8.8881	9.37205	9.1849	-0.187148	0.285149	0.783413
ENSMUSG00000104814	Gm42979	3.69543	3.10611	0	3.96864	4.08213	2.79899	2.26718	3.61659	1.34941	0.44122	0.817413
ENSMUSG00000098332	2310009A05Rik	7.22663	7.27127	6.34322	6.24309	7.08032	6.73179	6.94704	6.68507	-0.261975	0.402103	0.817413
ENSMUSG00000073460	Pnldc1	0	0	0	4.09774	0	0	0	1.36591	1.36591	0.261085	0.751783
ENSMUSG00000073468	Sft2d1	9.03076	8.83404	8.53868	9.36104	8.87655	9.35	8.80116	9.19586	0.394702	0.0312658	0.218373
ENSMUSG00000049694	BC048671	2.31759	0	0	0	0	0	0.77253	0	-0.77253	0.481172	0.817413
ENSMUSG00000049690	Nckap5	4.29253	2.8762	2.71561	2.77871	4.57092	5.48231	3.29478	4.27731	0.982531	0.169392	0.614065
ENSMUSG00000035329	Fbxo33	10.2765	8.9789	10.2024	10.3108	9.0723	10.1911	9.81927	9.8581	0.0388282	0.960834	0.990848
ENSMUSG00000035325	Sec31a	12.5243	12.6731	12.7093	12.7372	12.5279	12.6585	12.6355	12.6412	0.00566283	0.985457	0.995428
ENSMUSG00000070605	Zfp992	7.86702	8.02806	7.24179	8.50384	8.76395	8.34341	7.71229	8.53706	0.824775	0.000386897	0.00786175
ENSMUSG00000026950	Neb	8.80516	9.36482	9.2266	9.75283	9.63794	9.82155	9.13219	9.73744	0.605247	0.000214426	0.00490177
ENSMUSG00000075704	Txnrd2	9.98846	9.67796	9.58147	9.91712	9.67256	9.87136	9.7493	9.82035	0.0710501	0.673806	0.892628
ENSMUSG00000075707	Dio3	1.87053	2.60258	0	1.97497	1.09651	0	1.49103	1.02383	-0.467207	0.727422	0.918265
ENSMUSG00000075706	Gpx4	12.2329	12.0794	11.8489	12.2202	12.3997	12.2846	12.0537	12.3015	0.247817	0.0359227	0.240607
ENSMUSG00000075701	Selenos	11.5264	11.8468	11.7413	11.6147	11.7989	11.9162	11.7048	11.7766	0.0717413	0.573158	0.831054
ENSMUSG00000023707	Ogfod2	8.40257	8.10982	7.94265	7.32868	8.21421	7.58274	8.15168	7.70854	-0.443138	0.10196	0.466361
ENSMUSG00000075703	Selenoi	10.375	10.5127	10.4372	10.9795	10.4975	9.64309	10.4417	10.3734	-0.0683028	0.940683	0.9857
ENSMUSG00000075702	Selenom	4.7136	4.12842	4.23419	5.53709	4.08213	4.84855	4.35874	4.82259	0.463857	0.367777	0.817413
ENSMUSG00000026958	Dpp7	8.82642	8.65496	8.70192	8.59415	8.74493	8.07242	8.72777	8.4705	-0.257268	0.230319	0.714569
ENSMUSG00000108435	Gm45051	7.09265	6.60586	5.61149	6.27074	6.33425	6.25715	6.43667	6.28738	-0.149287	0.478822	0.817413
ENSMUSG00000056812	St8sia3	5.64813	5.33347	5.23854	0	4.93535	0	5.40671	1.64512	-3.76159	0.353989	0.817413
ENSMUSG00000043068	Fam89a	6.13079	5.92163	5.43703	6.06505	6.54239	6.9561	5.82982	6.52118	0.691362	0.0567861	0.326327
ENSMUSG00000043061	Tmem18	8.36237	9.10389	8.56012	9.23688	8.83039	9.03191	8.67546	9.03306	0.357601	0.104474	0.472606
ENSMUSG00000043065	Spice1	5.86092	5.33347	5.70687	6.42634	5.39168	5.19995	5.63375	5.67266	0.038909	0.767308	0.935283
ENSMUSG00000043067	Dpy19l1	11.9143	12.1309	12.3694	12.0616	12.1578	12.3525	12.1382	12.1906	0.052416	0.740566	0.92399
ENSMUSG00000022257	Laptm4b	9.41454	9.24628	9.41727	9.31862	9.401	9.53135	9.35937	9.41699	0.0576227	0.695617	0.902181
ENSMUSG00000022255	Mtdh	10.8932	10.7469	11.0705	10.7097	11.3512	11.6219	10.9035	11.2276	0.324067	0.0362594	0.241941
ENSMUSG00000022253	Nadk2	12.6232	12.7063	12.5937	12.9243	12.9314	13.121	12.6411	12.9922	0.351131	0.000211899	0.00484886
ENSMUSG00000029283	Cdc7	4.08236	0	0	0	0	0	1.36079	0	-1.36079	0.279108	0.77564
ENSMUSG00000031007	Atp6ap2	10.4036	10.2735	10.4103	9.75283	9.98119	9.79599	10.3625	9.84334	-0.519129	8.75e-06	0.000329933
ENSMUSG00000017288	Vps53	10.8187	10.7233	10.8091	10.8109	10.8522	11.0298	10.7837	10.8976	0.113943	0.28593	0.783467
ENSMUSG00000028882	Ppp1r8	8.22181	8.45568	8.62668	8.91642	8.81589	8.67325	8.43472	8.80185	0.367134	0.0352706	0.237905
ENSMUSG00000028883	Sema3a	3.36433	2.26462	0	4.32573	4.34713	5.03493	1.87632	4.56926	2.69294	0.0206796	0.16234
ENSMUSG00000028884	Rpa2	6.76281	7.56016	7.18771	7.49027	7.06813	6.75851	7.17023	7.10564	-0.0645891	0.811689	0.950687
ENSMUSG00000028885	Smpdl3b	4.08236	3.10611	4.67256	0	0	0	3.95367	0	-3.95367	0.00539854	0.0621403
ENSMUSG00000028886	Eya3	10.5165	10.4395	10.4068	10.3775	10.265	10.5629	10.4543	10.4018	-0.0524404	0.632678	0.868638
ENSMUSG00000028889	Yrdc	9.96947	9.78139	9.58356	9.25775	9.3765	9.94007	9.77814	9.52477	-0.253368	0.169631	0.614347
ENSMUSG00000034636	Zyg11b	11.3012	11.4036	11.5118	11.479	11.4895	11.4685	11.4055	11.479	0.0734888	0.485751	0.817413
ENSMUSG00000088212	Gm22082	0	0	2.1181	0	0	0	0.706034	0	-0.706034	0.488434	0.817413
ENSMUSG00000034634	Ly6d	5.6094	4.22943	4.31713	0	2.4734	0	4.71865	0.824466	-3.89419	0.00106303	0.0178421
ENSMUSG00000102411	Gm36936	5.5696	4.85327	5.10485	4.77509	4.63841	0	5.17591	3.13783	-2.03807	0.158391	0.594649
ENSMUSG00000102415	A430110C17Rik	3.1651	3.10611	0	0	0	0	2.0904	0	-2.0904	0.212943	0.687062
ENSMUSG00000102419	Gm36940	2.93388	3.30436	0	0	0	0	2.07942	0	-2.07942	0.213979	0.688177
ENSMUSG00000029422	Rsrc2	9.06694	9.07024	9.1858	9.27833	9.4131	9.30992	9.10766	9.33378	0.226121	0.094616	0.446554
ENSMUSG00000029427	Zcchc8	9.01232	8.91967	9.21854	8.73974	8.94812	8.69416	9.05018	8.79401	-0.256166	0.0969919	0.452404
ENSMUSG00000029426	Scarb2	13.0871	13.206	13.1755	12.7805	12.7051	12.9041	13.1562	12.7966	-0.359637	7.74e-05	0.00208202
ENSMUSG00000029428	Stx2	8.89243	8.60884	8.36437	8.58316	9.11439	9.05903	8.62188	8.91886	0.296983	0.120258	0.511935
ENSMUSG00000035585	Tsen34	9.72873	9.68908	9.01929	9.60319	9.48361	9.53135	9.47903	9.53938	0.0603516	0.897173	0.975863
ENSMUSG00000025701	Alox5	2.93388	0	0	0	3.63038	0	0.977961	1.21013	0.232164	0.756865	0.930112
ENSMUSG00000025702	2021-03-08	11.9636	11.9791	10.3732	12.0452	12.0218	11.2969	11.4387	11.7879	0.349294	0.691273	0.900865
ENSMUSG00000034987	Hrh2	0	0	0	2.4321	0	0	0	0.810701	0.810701	0.462958	0.817413
ENSMUSG00000034981	Parm1	5.20418	0	3.46253	4.69572	4.76461	0	2.8889	3.15345	0.264542	0.940331	0.985665
ENSMUSG00000021635	Rad17	9.58392	9.37312	9.41727	9.39912	9.28994	9.4841	9.4581	9.39106	-0.0670496	0.578402	0.835055
ENSMUSG00000021636	Marveld2	7.77377	7.42826	7.90962	7.8153	7.52574	7.64134	7.70388	7.66079	-0.0430915	0.794675	0.94556
ENSMUSG00000032679	Cd59a	10.9349	11.0073	10.6065	11.4006	11.1685	10.9966	10.8496	11.1886	0.338985	0.0140836	0.123899
ENSMUSG00000021638	Ocln	9.21617	9.53234	9.56034	8.97642	9.19506	9.04282	9.43628	9.07144	-0.364849	0.0120198	0.111019
ENSMUSG00000021639	Gtf2h2	7.70196	8.2121	8.00653	7.8153	8.35629	8.6305	7.97353	8.26736	0.293835	0.181474	0.636662
ENSMUSG00000032673	Prorsd1	8.62758	8.95328	8.74749	9.31862	8.91448	8.8637	8.77612	9.03227	0.256149	0.130423	0.535273
ENSMUSG00000032586	Traip	2.93388	0	3.60139	0	3.16489	0	2.17842	1.05496	-1.12346	0.590642	0.84409
ENSMUSG00000074151	Nlrc5	8.28461	8.58043	9.29726	7.78685	7.32528	6.05647	8.72077	7.0562	-1.66457	0.00506944	0.0593078
ENSMUSG00000032582	Rbm6	9.65933	9.81021	9.74581	9.96233	9.83061	9.70964	9.73845	9.83419	0.0957413	0.443749	0.817413
ENSMUSG00000032583	Mon1a	9.40043	8.78511	9.24526	9.42703	9.38635	9.13236	9.1436	9.31525	0.171647	0.361328	0.817413
ENSMUSG00000074158	Zfp976	6.67176	7.49064	7.25237	7.59241	7.33549	7.4579	7.13826	7.46193	0.323674	0.286901	0.784235
ENSMUSG00000032589	Bsn	3.36433	0	1.69041	2.77871	0	0	1.68491	0.926237	-0.758678	0.694781	0.90176
ENSMUSG00000110928	RP23-114G13.1	3.53936	4.57481	4.31713	3.96864	4.17597	2.31412	4.14377	3.48625	-0.657522	0.530717	0.820333
ENSMUSG00000086192	Gm13609	2.31759	0	0	0	0	0	0.77253	0	-0.77253	0.481172	0.817413
ENSMUSG00000046186	Cd109	3.36433	0	0	0	0	0	1.12144	0	-1.12144	0.407844	0.817413
ENSMUSG00000030880	Polr3e	8.96709	9.11052	9.25844	8.79315	9.12913	9.3054	9.11202	9.07589	-0.0361211	0.834731	0.960581
ENSMUSG00000087294	Gm13556	0	0	0	1.97497	0	0	0	0.658323	0.658323	0.478676	0.817413
ENSMUSG00000033985	Tesk2	10.4496	10.372	10.5107	10.1711	10.191	10.1985	10.4441	10.1869	-0.257208	0.0122706	0.112698
ENSMUSG00000033987	Dnah17	3.1651	1.82247	2.44757	2.77871	0	0	2.47838	0.926237	-1.55214	0.513279	0.817413
ENSMUSG00000033983	Coil	6.69044	7.29477	6.98701	6.79337	6.70863	6.33021	6.99074	6.61074	-0.380004	0.188948	0.649467
ENSMUSG00000087299	Gm12953	5.03913	5.4215	5.61149	5.53709	5.22605	5.1198	5.35737	5.29431	-0.0630617	0.870429	0.970635
ENSMUSG00000030887	Pdzd9	2.6584	3.10611	2.94157	3.66957	0	4.07827	2.90202	2.58261	-0.31941	0.724394	0.916485
ENSMUSG00000020955	Ap4s1	7.63605	8.06952	7.48542	8.11893	8.0191	8.16519	7.73033	8.10107	0.370744	0.108099	0.482518
ENSMUSG00000044098	Rsbn1	8.40257	8.64585	7.73961	7.88851	7.46197	8.32566	8.26268	7.89204	-0.370634	0.1362	0.54922
ENSMUSG00000086524	Pabpc1l2a-ps	0	1.82247	1.69041	1.97497	0	0	1.17096	0.658323	-0.512636	0.835717	0.961088
ENSMUSG00000044092	C130050O18Rik	4.19127	4.64962	4.60813	3.49303	4.17597	3.16125	4.48301	3.61008	-0.872924	0.254824	0.745683
ENSMUSG00000075284	Wipf1	8.52727	7.94138	8.48587	7.27508	7.88657	8.10401	8.31817	7.75522	-0.562953	0.0198229	0.157345
ENSMUSG00000075289	Carns1	5.64813	5.37815	5.98572	4.77509	4.8238	5.60515	5.67067	5.06801	-0.602654	0.195416	0.660047
ENSMUSG00000024941	Scyl1	11	10.9758	11.1833	10.882	11.0572	11.0077	11.053	10.9823	-0.0706738	0.469519	0.817413
ENSMUSG00000024940	Ltbp3	4.08236	5.33347	5.39946	5.82509	6.45148	4.94475	4.93843	5.74044	0.802012	0.110739	0.487496
ENSMUSG00000024943	Smc5	9.55364	9.61401	9.81523	9.41469	8.95144	9.13746	9.66096	9.16786	-0.493095	0.00129621	0.0207503
ENSMUSG00000024942	Capn1	9.77101	9.83647	10.1818	9.78674	10.0556	10.1489	9.92976	9.99707	0.0673076	0.687162	0.898747
ENSMUSG00000024944	Arl2	6.47037	6.40457	5.67577	6.58892	5.64242	6.29414	6.18357	6.17516	-0.00840922	0.983549	0.994821
ENSMUSG00000024947	Men1	10.0239	9.97928	10.2454	10.0326	10.0892	10.0684	10.0828	10.0634	-0.0194439	0.81121	0.950661
ENSMUSG00000021936	Mapk8	9.50172	9.53728	9.62281	9.12772	9.62759	9.675	9.55394	9.47677	-0.0771665	0.679128	0.89537
ENSMUSG00000024949	Sf1	11.438	11.2905	11.4086	10.9218	11.1967	11.2376	11.3791	11.1187	-0.26035	0.0178964	0.14661
ENSMUSG00000024948	Map4k2	8.54277	8.93471	8.31477	8.32418	8.26848	8.34341	8.59742	8.31202	-0.285392	0.105014	0.474082
ENSMUSG00000079614	Seh1l	11.0046	10.952	11.1756	11.0894	11.0649	11.1457	11.0441	11.1	0.0559001	0.630812	0.867849
ENSMUSG00000059534	Uqcr10	10.2262	10.3637	10.0394	10.1055	10.4501	10.329	10.2098	10.2948	0.0850641	0.534427	0.820333
ENSMUSG00000021932	Rnaseh2b	7.66467	7.91129	7.30412	7.35475	7.44322	7.374	7.62669	7.39065	-0.23604	0.27432	0.769065
ENSMUSG00000051727	Kctd14	3.53936	3.10611	3.95221	4.09774	0	4.07827	3.53256	2.72534	-0.80722	0.955685	0.990657
ENSMUSG00000051721	Wdcp	7.07854	7.63571	7.08494	8.05676	7.76349	6.75851	7.2664	7.52625	0.259854	0.269271	0.762788
ENSMUSG00000051723	Rpl31-ps13	2.6584	2.8762	2.44757	1.30194	3.33728	2.79899	2.66072	2.4794	-0.18132	0.973387	0.992535
ENSMUSG00000087435	Gm16323	0	0	2.44757	0	0	0	0.815857	0	-0.815857	0.475452	0.817413
ENSMUSG00000079610	Ankrd39	5.82756	5.54422	5.32124	6.03312	4.93535	5.8233	5.56434	5.59726	0.0329169	0.862636	0.968371
ENSMUSG00000080801	Gm13310	1.87053	1.82247	1.0798	1.30194	1.71227	2.31412	1.59093	1.77611	0.185178	0.892727	0.975863
ENSMUSG00000005615	Pcyt1a	11.0093	12.3095	11.3278	12.0915	12.2876	11.3538	11.5488	11.911	0.362114	0.538604	0.820333
ENSMUSG00000005610	Eif4g2	14.3969	14.3017	14.313	14.3309	14.378	14.4561	14.3372	14.3883	0.051168	0.579885	0.835867
ENSMUSG00000005611	Mrvi1	6.44859	5.23972	6.28259	6.12687	6.77011	5.66285	5.9903	6.18661	0.19631	0.644214	0.875496
ENSMUSG00000040570	Rundc3b	5.44316	2.8762	4.05245	3.29184	0	3.45056	4.12394	2.24746	-1.87647	0.108238	0.482518
ENSMUSG00000051098	Mblac2	9.14687	9.02529	9.4475	9.50767	9.34906	9.36746	9.20655	9.40806	0.201509	0.204592	0.674714
ENSMUSG00000082520	Gm13349	0	1.82247	2.71561	3.05797	0	3.45056	1.51269	2.16951	0.656816	0.578585	0.835141
ENSMUSG00000031429	Psmd10	8.10834	7.76753	8.04961	7.7964	7.77102	7.82948	7.97516	7.79897	-0.176192	0.341408	0.817413
ENSMUSG00000044231	Nhlrc1	5.39843	3.63411	3.72805	5.93285	5.82732	5.60515	4.25353	5.78844	1.53491	0.0179989	0.147064
ENSMUSG00000046934	Csl	2.31759	0	0	0	1.09651	0	0.77253	0.365505	-0.407025	0.698538	0.903677
ENSMUSG00000102526	Gm37785	4.08236	3.90233	3.30888	3.96864	3.75725	2.79899	3.76452	3.50829	-0.256229	0.813901	0.951037
ENSMUSG00000026548	Slamf9	4.85274	2.26462	0	4.21623	3.63038	0	2.37245	2.61554	0.243082	0.941193	0.98575
ENSMUSG00000026542	Apcs	11.3622	11.4257	11.3775	12.167	12.2899	12.3557	11.3885	12.2709	0.882392	3.71e-21	1.21e-18
ENSMUSG00000026547	Tagln2	8.65637	8.76	8.92326	9.16134	8.62942	8.6305	8.77988	8.80709	0.0272109	0.814977	0.951037
ENSMUSG00000026546	Cfap45	0	2.26462	0	3.49303	2.96906	2.79899	0.754874	3.08703	2.33215	0.186098	0.644885
ENSMUSG00000026544	Dusp23	9.82694	9.65771	9.71364	10.7678	10.4583	9.91357	9.73276	10.3799	0.647141	6.92e-05	0.00190079
ENSMUSG00000059395	Nkapl	4.55959	2.60258	3.13688	3.66957	3.87386	3.16125	3.43302	3.56823	0.135211	0.94132	0.985779
ENSMUSG00000100104	Gm5644	1.21929	1.18169	0	0	2.14245	2.31412	0.800329	1.48553	0.685196	0.604114	0.852946
ENSMUSG00000107335	Gm43372	3.36433	3.30436	2.71561	0	1.71227	3.45056	3.1281	1.72094	-1.40716	0.479886	0.817413
ENSMUSG00000000326	Comt	15.0013	14.8245	15.0283	15.3976	15.2662	14.547	14.9514	15.0703	0.118921	0.33586	0.817413
ENSMUSG00000101397	Mug-ps1	11.7953	11.7671	11.6848	11.036	11.0718	10.9524	11.7491	11.0201	-0.729004	1.21e-14	2.25e-12
ENSMUSG00000003617	Cp	16.2898	16.085	16.3667	15.6999	15.7997	15.6867	16.2472	15.7288	-0.518403	1.45e-07	8.36e-06
ENSMUSG00000095805	Gm22092	1.21929	0	0	0	2.4734	2.31412	0.406432	1.59584	1.18941	0.454681	0.817413
ENSMUSG00000098328	Gm27271	0	1.82247	0	0	0	0	0.607489	0	-0.607489	0.504143	0.817413
ENSMUSG00000098329	Mir6966	0	1.18169	1.0798	0	1.09651	1.57846	0.753831	0.891658	0.137828	0.921372	0.98011
ENSMUSG00000098327	Mir7087	1.21929	1.18169	1.69041	1.30194	2.14245	1.57846	1.3638	1.67428	0.310485	0.812309	0.950687
ENSMUSG00000098325	Mir7048	0	1.18169	1.0798	1.30194	0	0	0.753831	0.433979	-0.319852	0.867411	0.970054
ENSMUSG00000098322	5830468F06Rik	2.31759	0	0	0	0	0	0.77253	0	-0.77253	0.481172	0.817413
ENSMUSG00000098320	Vis1	2.93388	0	0	0	0	0	0.977961	0	-0.977961	0.46166	0.817413
ENSMUSG00000084274	Gm12504	2.93388	2.26462	0	1.30194	2.14245	1.57846	1.73283	1.67428	-0.0585508	0.769889	0.935685
ENSMUSG00000084277	Gm11702	1.87053	0	1.0798	2.4321	0	0	0.983442	0.810701	-0.172741	0.941727	0.986025
ENSMUSG00000084276	Gm8317	1.21929	1.18169	1.0798	0	1.09651	1.57846	1.16026	0.891658	-0.268604	0.925051	0.98142
ENSMUSG00000084271	Gm14846	1.87053	0	1.69041	0	1.71227	0	1.18698	0.570755	-0.616223	0.768825	0.935655
ENSMUSG00000084279	Gm13232	2.31759	1.82247	1.0798	1.30194	1.09651	2.31412	1.73995	1.57086	-0.169094	0.899957	0.975863
ENSMUSG00000033237	Arid2	10.8942	11.064	10.9683	11.0013	10.7501	10.7919	10.9755	10.8478	-0.127704	0.245349	0.733794
ENSMUSG00000002059	Rab34	7.40682	7.59843	7.29392	8.12652	7.91407	8.28029	7.43306	8.10696	0.673898	0.00150587	0.0232911
ENSMUSG00000002058	Unc119	7.50504	7.36306	6.4014	5.49082	6.29296	6.5295	7.08983	6.10443	-0.985407	0.0055179	0.0632695
ENSMUSG00000002055	Spag5	0	2.8762	0	4.98994	3.75725	4.51422	0.958733	4.42047	3.46174	0.0118167	0.109987
ENSMUSG00000002052	Supt6	10.8698	10.7816	10.8436	10.6465	10.8522	10.6296	10.8317	10.7094	-0.12225	0.254241	0.744841
ENSMUSG00000088555	Gm22098	1.21929	0	0	0	0	0	0.406432	0	-0.406432	0.552776	0.820333
ENSMUSG00000002550	Uck1	9.69213	9.71108	9.51714	10.2975	10.3593	10.5381	9.64012	10.3983	0.758158	6.99e-10	6.73e-08
ENSMUSG00000046062	Ppp1r15b	12.846	12.9512	12.9541	12.7325	12.5503	12.687	12.9171	12.6566	-0.26051	0.00409131	0.0503106
ENSMUSG00000088559	Mir1981	2.31759	2.60258	2.1181	1.97497	2.4734	2.79899	2.34609	2.41578	0.0696948	0.944226	0.98733
ENSMUSG00000083725	Gm11865	0	0	0	2.77871	0	0	0	0.926237	0.926237	0.454565	0.817413
ENSMUSG00000016356	Col20a1	0	3.77445	1.69041	3.82684	2.74241	4.74549	1.82162	3.77158	1.94996	0.219934	0.69829
ENSMUSG00000072407	Gm6419	4.7136	4.57481	4.90484	5.44302	5.1355	4.51422	4.73108	5.03092	0.299834	0.510869	0.817413
ENSMUSG00000081382	Rpl18-ps1	3.1651	3.30436	2.94157	4.21623	3.87386	3.69143	3.13701	3.92718	0.790164	0.331193	0.817413
ENSMUSG00000064302	Clasp1	9.49907	9.621	9.45668	9.59228	9.26079	9.02643	9.52558	9.29317	-0.232416	0.170848	0.615858
ENSMUSG00000064307	Lrrc51	4.08236	4.4959	3.30888	3.29184	2.4734	0	3.96238	1.92174	-2.04063	0.123835	0.520519
ENSMUSG00000080383	Gm22103	0	0	1.0798	0	0	0	0.359933	0	-0.359933	0.563571	0.823631
ENSMUSG00000078139	AK157302	8.41385	8.77261	8.28932	8.47441	8.63356	8.43735	8.49192	8.51511	0.023181	0.958314	0.99074
ENSMUSG00000078134	Gm12355	4.7136	4.91523	4.39557	5.82509	5.0389	5.1198	4.6748	5.32793	0.653131	0.185637	0.644243
ENSMUSG00000078137	Ankrd63	0	0	1.69041	0	0	0	0.56347	0	-0.56347	0.511179	0.817413
ENSMUSG00000082896	Gm5844	8.31502	8.2666	8.76237	8.34384	8.34623	8.65204	8.44799	8.44737	-0.000623423	0.911581	0.976699
ENSMUSG00000082895	Rpsa-ps9	3.96455	2.60258	3.95221	3.05797	2.96906	2.79899	3.50644	2.94201	-0.564439	0.463799	0.817413
ENSMUSG00000038831	Ralgps1	7.59699	8.49171	8.13783	7.88851	7.92762	7.82948	8.07551	7.88187	-0.19364	0.296471	0.794166
ENSMUSG00000014195	Dnajc7	10.3765	10.2131	10.4974	9.90614	9.94833	10.1838	10.3623	10.0127	-0.349568	0.00416676	0.0510615
ENSMUSG00000099492	Gm5525	5.52867	5.33347	5.00831	6.03312	6.04193	5.8233	5.29015	5.96612	0.675967	0.0979475	0.455005
ENSMUSG00000086479	Gm16014	0	1.82247	0	0	0	0	0.607489	0	-0.607489	0.504143	0.817413
ENSMUSG00000109709	Gm45290	3.83626	2.8762	0	1.30194	3.75725	0	2.23749	1.6864	-0.55109	0.795399	0.945791
ENSMUSG00000086474	9130204K15Rik	3.69543	0	0	2.4321	0	0	1.23181	0.810701	-0.42111	0.622453	0.862799
ENSMUSG00000001506	Col1a1	8.15615	7.04054	7.65445	7.70815	7.77102	7.12986	7.61704	7.53634	-0.0807007	0.68139	0.896066
ENSMUSG00000001507	Itga3	8.52727	8.39717	8.96887	8.78358	8.50836	8.96467	8.6311	8.7522	0.121099	0.59351	0.845641
ENSMUSG00000019261	Map1s	7.22663	6.799	6.54598	7.59241	6.95355	6.5295	6.8572	7.02515	0.167949	0.504576	0.817413
ENSMUSG00000092060	Bend4	4.47595	3.63411	4.79337	4.21623	5.22605	4.51422	4.30114	4.65217	0.351028	0.58544	0.84065
ENSMUSG00000101537	Gm29571	4.63865	4.22943	4.39557	3.96864	2.74241	0	4.42122	2.23702	-2.1842	0.108872	0.483924
ENSMUSG00000029007	Agtrap	7.65519	7.19839	8.14919	6.98915	7.08032	6.88514	7.66759	6.98487	-0.68272	0.00683545	0.074021
ENSMUSG00000038517	Tbkbp1	7.82538	8.35308	8.64285	8.18581	8.43907	7.79118	8.27377	8.13868	-0.135084	0.529235	0.820333
ENSMUSG00000029005	Draxin	0	0	3.95221	0	0	2.79899	1.3174	0.932996	-0.384406	0.614341	0.858617
ENSMUSG00000022052	Ppp2r2a	10.536	10.4156	10.5347	10.1675	9.97957	10.1862	10.4954	10.1111	-0.384329	0.000532708	0.0102076
ENSMUSG00000010021	Kif19a	0	2.26462	0	3.82684	0	0	0.754874	1.27561	0.52074	0.537713	0.820333
ENSMUSG00000010025	Aldh3a2	14.2302	14.0822	13.6134	14.606	14.7927	14.8002	13.9753	14.733	0.757706	1.25e-07	7.39e-06
ENSMUSG00000022057	Adamdec1	6.33449	4.78853	5.23854	4.77509	5.70672	3.69143	5.45385	4.72441	-0.72944	0.282689	0.780279
ENSMUSG00000097233	Gm17552	0	1.82247	2.71561	0	0	0	1.51269	0	-1.51269	0.380631	0.817413
ENSMUSG00000112186	RP23-212M22.2	0	0	2.44757	1.97497	2.14245	1.57846	0.815857	1.89863	1.08277	0.71634	0.911478
ENSMUSG00000112189	RP23-282P18.4	7.28923	6.46796	7.33431	7.31546	7.68585	5.66285	7.0305	6.88806	-0.142442	0.905667	0.975863
ENSMUSG00000030762	Aqp8	10.0367	9.70013	9.44058	9.67995	9.14373	9.6609	9.7258	9.49486	-0.230941	0.183541	0.640925
ENSMUSG00000009739	Pou6f1	8.23459	8.10318	7.88943	7.77725	7.73293	7.69764	8.07574	7.73594	-0.339795	0.0790257	0.401808
ENSMUSG00000065952	C330021F23Rik	5.48655	5.62059	5.61149	5.70863	6.31375	5.92113	5.57288	5.98117	0.408291	0.266927	0.761033
ENSMUSG00000065954	Tacc1	11.2829	10.8868	11.4239	11.2859	11.0094	10.9952	11.1979	11.0968	-0.101019	0.407463	0.817413
ENSMUSG00000097429	Gm26520	2.93388	0	0	0	0	0	0.977961	0	-0.977961	0.46166	0.817413
ENSMUSG00000108155	Gm44443	2.6584	0	0	0	0	0	0.886133	0	-0.886133	0.469268	0.817413
ENSMUSG00000108154	Gm44033	1.21929	0	0	3.05797	0	0	0.406432	1.01932	0.612891	0.552683	0.820333
ENSMUSG00000097426	Gm8941	7.16119	7.70751	7.1655	8.45044	8.71006	8.60129	7.34474	8.58726	1.24253	6.44e-09	5.2e-07
ENSMUSG00000097421	D630011A20Rik	0	0	0	3.05797	0	0	0	1.01932	1.01932	0.449341	0.817413
ENSMUSG00000010651	Acaa1b	14.5071	14.0216	13.7543	13.3997	13.7849	13.7614	14.0943	13.6487	-0.445682	0.00286462	0.0382955
ENSMUSG00000054967	Zfp647	5.30457	5.58291	5.73731	5.39358	4.08213	5.19995	5.54159	4.89189	-0.649708	0.246129	0.733955
ENSMUSG00000021504	B4galt7	7.84218	8.14257	8.37892	8.53837	8.62526	8.55632	8.12122	8.57332	0.452091	0.0199408	0.158001
ENSMUSG00000041308	Sntb2	8.79656	8.98974	9.14097	8.89881	8.88699	8.90613	8.97576	8.89731	-0.0784432	0.548805	0.820333
ENSMUSG00000041309	Nkx6-2	0	2.60258	0	0	0	0	0.867526	0	-0.867526	0.470403	0.817413
ENSMUSG00000041303	Gtf3c3	8.49576	8.95697	8.95599	8.95953	8.7022	8.66622	8.80291	8.77598	-0.0269254	0.817582	0.952311
ENSMUSG00000041301	Cftr	2.31759	0	0	0	3.33728	2.31412	0.77253	1.8838	1.11127	0.497612	0.817413
ENSMUSG00000000365	Rnf17	2.31759	0	0	1.97497	1.71227	0	0.77253	1.22908	0.456548	0.889983	0.975767
ENSMUSG00000078880	Gm14308	0	5.08658	4.31713	3.66957	4.17597	4.51422	3.13457	4.11992	0.985353	0.956322	0.99074
ENSMUSG00000093336	Mir1954	0	0	0	0	2.4734	0	0	0.824466	0.824466	0.46085	0.817413
ENSMUSG00000093085	Gm24325	0	0	2.1181	0	0	0	0.706034	0	-0.706034	0.488434	0.817413
ENSMUSG00000022014	Epsti1	6.55433	5.92163	6.59666	6.2149	5.0389	5.19995	6.35754	5.48458	-0.872957	0.0529124	0.311106
ENSMUSG00000022016	Akap11	10.9082	10.9912	10.9367	10.1948	9.83422	10.4404	10.9454	10.1565	-0.788901	2.56e-08	1.82e-06
ENSMUSG00000022010	Tsc22d1	10.1591	10.2007	10.1609	11.4709	11.7822	11.772	10.1736	11.675	1.50146	3.32e-41	5.06e-38
ENSMUSG00000022013	Dnajc15	8.68924	8.30182	8.22095	8.20026	8.92466	8.73509	8.404	8.62	0.216	0.270722	0.764226
ENSMUSG00000022012	Enox1	0	0	0	3.05797	0	0	0	1.01932	1.01932	0.449341	0.817413
ENSMUSG00000022019	Tdrd3	8.86392	8.93844	8.70192	8.73479	8.51735	8.92983	8.83476	8.72732	-0.107437	0.502648	0.817413
ENSMUSG00000022018	Rgcc	0	0	0	0	2.74241	0	0	0.914137	0.914137	0.454692	0.817413
ENSMUSG00000055612	Cdca7	6.15788	6.17056	5.64399	5.93285	6.16147	5.41673	5.99081	5.83702	-0.153795	0.740305	0.92399
ENSMUSG00000020528	Prpsap2	8.71226	8.85791	8.95599	8.64257	9.14663	8.9121	8.84205	8.90043	0.0583777	0.689058	0.89986
ENSMUSG00000020527	Myo19	8.07319	8.3808	8.02515	8.0165	8.1229	8.16519	8.15971	8.10153	-0.0581813	0.708984	0.908051
ENSMUSG00000020526	Znhit3	6.49182	6.44713	7.08494	7.46656	7.35568	7.18997	6.67463	7.33741	0.662772	0.0208157	0.163073
ENSMUSG00000020525	Ppm1d	8.64205	8.85396	8.19925	8.18581	7.55223	8.46194	8.56508	8.06666	-0.498424	0.0408016	0.263035
ENSMUSG00000020524	Gria1	2.6584	0	0	3.29184	2.96906	0	0.886133	2.08697	1.20083	0.487404	0.817413
ENSMUSG00000020523	Fam114a2	11.1998	11.2009	11.2018	11.4498	11.3385	11.3071	11.2008	11.3652	0.164361	0.085735	0.422561
ENSMUSG00000020522	Mfap3	9.26993	9.28493	9.76256	9.57297	9.57042	9.59943	9.43914	9.58094	0.141799	0.436542	0.817413
ENSMUSG00000020521	Rnft1	10.824	10.9649	11.1254	10.8731	10.9342	10.8919	10.9715	10.8997	-0.071745	0.453711	0.817413
ENSMUSG00000020520	Galnt10	7.85051	7.39603	8.12637	8.00008	8.09314	7.55253	7.79097	7.88191	0.0909471	0.727653	0.918363
ENSMUSG00000091866	Gm6257	0	0	2.1181	0	1.09651	3.16125	0.706034	1.41925	0.71322	0.63273	0.868638
ENSMUSG00000091867	Cyp2a22	8.80944	8.40799	8.10319	8.93382	9.20066	9.16767	8.4402	9.10072	0.660512	0.000782183	0.013861
ENSMUSG00000094812	Gm22614	0	0	0	0	1.09651	0	0	0.365505	0.365505	0.530725	0.820333
ENSMUSG00000094814	Gm21973	0	0	0	0	3.63038	0	0	1.21013	1.21013	0.343601	0.817413
ENSMUSG00000094817	Cphx3	2.6584	2.8762	2.94157	3.29184	4.26409	3.69143	2.82539	3.74912	0.923729	0.274518	0.769338
ENSMUSG00000109282	Gm45188	3.69543	3.77445	3.13688	0	0	0	3.53559	0	-3.53559	0.0250522	0.186484
ENSMUSG00000059263	Usp47	12.328	12.3077	12.4569	12.2466	12.3518	12.217	12.3642	12.2718	-0.0923951	0.290793	0.786901
ENSMUSG00000028759	Hp1bp3	11.5336	11.6977	11.5091	11.7004	11.4918	11.61	11.5801	11.6007	0.0206238	0.878742	0.972363
ENSMUSG00000052062	Pard3b	8.41946	8.43468	7.7913	7.59241	7.8656	7.76507	8.21515	7.74102	-0.47412	0.0245674	0.183791
ENSMUSG00000013646	Sh3bp5l	8.83064	8.73015	9.1324	8.95953	8.65409	8.8637	8.89773	8.82577	-0.0719563	0.614818	0.858882
ENSMUSG00000028756	Pink1	12.8142	12.5527	12.4321	12.3331	12.5766	12.3769	12.5997	12.4289	-0.17079	0.122906	0.51848
ENSMUSG00000057614	Gnai1	7.57706	6.54836	7.20959	5.70863	7.94772	7.4579	7.11167	7.03808	-0.0735899	0.741654	0.924339
ENSMUSG00000028718	Stil	3.83626	0	0	3.49303	0	4.23868	1.27875	2.57724	1.29848	0.556286	0.821969
ENSMUSG00000028719	Cmpk1	11.462	11.4644	11.3685	11.4285	11.5055	11.525	11.4316	11.4863	0.0547	0.588009	0.842487
ENSMUSG00000028710	Atpaf1	8.10138	8.32483	8.48139	8.84004	8.85543	8.72835	8.30253	8.80794	0.505412	0.00316537	0.0415148
ENSMUSG00000025582	Nptx1	0	2.60258	0	0	0	0	0.867526	0	-0.867526	0.470403	0.817413
ENSMUSG00000028712	Cyp4a31	9.64743	10.4329	9.41256	8.74468	7.87962	9.38471	9.83095	8.66967	-1.16128	0.0343965	0.23381
ENSMUSG00000028713	Cyp4b1	8.73493	8.3362	9.16356	8.95101	8.88352	9.00427	8.74489	8.94627	0.201374	0.412751	0.817413
ENSMUSG00000028715	Cyp4a14	14.0248	14.1431	12.9656	10.9273	10.2119	12.3259	13.7111	11.155	-2.5561	0.00136934	0.0216182
ENSMUSG00000028716	Pdzk1ip1	7.26452	6.48848	6.85444	7.32868	5.67493	6.36539	6.86914	6.45633	-0.412813	0.451212	0.817413
ENSMUSG00000025583	Rptor	10.4781	10.6948	10.6945	10.697	10.6797	10.6565	10.6225	10.6777	0.0552688	0.658055	0.884215
ENSMUSG00000102162	Gm2367	0	0	0	0	1.09651	0	0	0.365505	0.365505	0.530725	0.820333
ENSMUSG00000039176	Polg	10.5308	10.634	10.402	10.7703	10.4336	10.505	10.5223	10.5696	0.0473243	0.703368	0.905363
ENSMUSG00000052396	Mogat2	0	0	4.60813	5.89782	6.85768	5.96767	1.53604	6.24106	4.70501	0.213051	0.687062
ENSMUSG00000087993	Mir1982	1.21929	1.18169	1.0798	1.30194	1.09651	1.57846	1.16026	1.32564	0.165375	0.910165	0.975863
ENSMUSG00000052392	Acot4	11.6347	11.8368	11.2736	11.1933	11.0308	11.7296	11.5817	11.3179	-0.263817	0.128358	0.529459
ENSMUSG00000078554	Fam229a	2.93388	0	0	0	0	0	0.977961	0	-0.977961	0.46166	0.817413
ENSMUSG00000108115	Gm7039	1.21929	1.82247	0	0	0	0	1.01392	0	-1.01392	0.482061	0.817413
ENSMUSG00000039178	Tbc1d19	6.42648	5.08658	5.1508	6.56679	6.01679	6.49814	5.55462	6.36057	0.805949	0.109908	0.485564
ENSMUSG00000092889	Gm22121	1.87053	0	0	0	0	2.31412	0.623509	0.771374	0.147865	0.893644	0.975863
ENSMUSG00000092885	Gm22123	1.21929	1.18169	1.0798	1.30194	1.09651	1.57846	1.16026	1.32564	0.165375	0.910165	0.975863
ENSMUSG00000092887	Snord53	0	1.18169	1.0798	0	0	0	0.753831	0	-0.753831	0.507548	0.817413
ENSMUSG00000067629	Syngap1	4.78485	5.19045	3.13688	4.77509	5.35202	4.07827	4.37073	4.73513	0.364401	0.716018	0.911478
ENSMUSG00000025092	Hspa12a	5.82756	6.76575	6.52868	6.73502	6.52466	6.75851	6.374	6.67273	0.298733	0.4644	0.817413
ENSMUSG00000050677	Ccdc96	2.31759	4.0198	0	3.82684	2.4734	4.38302	2.11246	3.56109	1.44862	0.453721	0.817413
ENSMUSG00000021737	Psmd6	11.2806	11.2891	11.4186	11.3959	11.4659	11.3884	11.3294	11.4168	0.087362	0.376182	0.817413
ENSMUSG00000021731	Mrps30	9.66642	9.88953	9.71364	9.75038	9.77546	9.88051	9.75653	9.80212	0.0455897	0.763755	0.933709
ENSMUSG00000021733	Slc4a7	9.48041	9.4692	9.68465	9.34162	8.94146	9.41021	9.54475	9.23109	-0.313658	0.0417623	0.267045
ENSMUSG00000065176	Rnu12	1.87053	1.18169	3.72805	2.4321	0	0	2.26009	0.810701	-1.44939	0.400338	0.817413
ENSMUSG00000035873	Pawr	8.78792	8.73445	8.83101	8.27725	7.80814	8.26173	8.78446	8.1157	-0.668756	0.000218829	0.0049623
ENSMUSG00000035877	Zhx3	12.304	12.1103	11.7902	11.6598	11.7386	11.7663	12.0681	11.7216	-0.346585	0.00346308	0.0446005
ENSMUSG00000035875	AI182371	13.2195	13.0465	13.171	13.1156	13.1862	13.0706	13.1457	13.1241	-0.0215393	0.768823	0.935655
ENSMUSG00000106262	Gm43375	0	3.10611	0	5.11723	0	0	1.03537	1.70574	0.670373	0.62551	0.865148
ENSMUSG00000035878	Hykk	11.4094	11.8393	11.6219	11.7306	11.3499	11.4876	11.6236	11.5227	-0.100862	0.417507	0.817413
ENSMUSG00000106265	Gm42490	0	0	0	1.97497	0	0	0	0.658323	0.658323	0.478676	0.817413
ENSMUSG00000106264	Mir7646	1.21929	1.18169	1.0798	1.30194	1.09651	1.57846	1.16026	1.32564	0.165375	0.910165	0.975863
ENSMUSG00000086725	A630052C17Rik	6.42648	7.01247	6.43893	6.84946	6.16147	7.15018	6.62596	6.72037	0.0944067	0.753811	0.928858
ENSMUSG00000086724	Gm12833	0	1.82247	1.0798	0	0	0	0.967422	0	-0.967422	0.484379	0.817413
ENSMUSG00000052934	Fbxo31	12.0357	12.0602	11.8024	11.5527	11.6257	11.829	11.9661	11.6691	-0.296938	0.00708899	0.0761813
ENSMUSG00000086728	Man2c1os	2.93388	5.23972	3.84448	3.66957	4.34713	4.84855	4.00603	4.28842	0.28239	0.968517	0.991642
ENSMUSG00000022837	Iqcb1	8.10138	8.55146	8.24234	8.7496	8.33101	8.48612	8.29839	8.52224	0.223853	0.262285	0.753881
ENSMUSG00000022836	Mylk	11.6323	11.807	11.5988	12.0764	12.0558	12.2182	11.6793	12.1168	0.437407	2.14e-05	0.000709049
ENSMUSG00000076755	Gm16602	2.93388	0	2.44757	0	0	0	1.79382	0	-1.79382	0.298993	0.796633
ENSMUSG00000076754	Trgv2	2.31759	0	0	0	0	0	0.77253	0	-0.77253	0.481172	0.817413
ENSMUSG00000022833	Ccdc14	4.08236	4.91523	3.46253	0	4.76461	3.16125	4.15337	2.64195	-1.51142	0.516374	0.817413
ENSMUSG00000022831	Hcls1	7.97759	6.19575	7.24179	6.54431	7.06813	6.78474	7.13838	6.79906	-0.339317	0.17683	0.628864
ENSMUSG00000022838	Eaf2	0	0	0	0	2.74241	4.38302	0	2.37514	2.37514	0.101252	0.464596
ENSMUSG00000039824	Myl6b	4.19127	4.85327	4.31713	2.77871	4.42564	4.84855	4.45389	4.01764	-0.436253	0.720397	0.913991
ENSMUSG00000039826	Trub2	7.68343	7.92641	7.79853	7.82465	7.64541	7.89114	7.80279	7.78707	-0.0157247	0.902867	0.975863
ENSMUSG00000086095	Gm15328	2.93388	0	0	0	3.16489	2.79899	0.977961	1.98796	1.01	0.634145	0.869568
ENSMUSG00000027722	Spata5	7.33742	7.79251	8.73999	7.46656	8.06275	7.52167	7.95664	7.68366	-0.272983	0.226125	0.708212
ENSMUSG00000070348	Ccnd1	10.1641	10.6236	11.0742	9.80103	9.827	9.14254	10.6206	9.59019	-1.03043	0.00135834	0.021504
ENSMUSG00000020069	Hnrnph3	7.17452	7.36306	7.53824	7.95818	7.75591	8.20459	7.35861	7.97289	0.614287	0.00607399	0.0678317
ENSMUSG00000020063	Sirt1	9.12301	8.87749	9.2266	8.53837	8.61692	8.73509	9.0757	8.63013	-0.445575	0.00351108	0.0449906
ENSMUSG00000020067	Mypn	3.53936	2.60258	0	0	3.63038	0	2.04731	1.21013	-0.837187	0.833335	0.959941
ENSMUSG00000020064	Herc4	10.6608	10.8585	10.5358	10.9785	10.9542	11.0022	10.685	10.9783	0.293256	0.0127686	0.116014
ENSMUSG00000070345	Hsf5	0	0	0	3.49303	1.71227	0	0	1.7351	1.7351	0.256052	0.747521
ENSMUSG00000052942	Glis3	5.35226	5.28735	4.60813	5.53709	5.18149	3.69143	5.08258	4.80334	-0.279247	0.85296	0.965273
ENSMUSG00000030968	Pdilt	8.36237	8.48151	8.11483	8.29081	8.4007	8.30768	8.31957	8.33307	0.013497	0.979217	0.993746
ENSMUSG00000030963	Umod	0	0	3.46253	0	0	4.23868	1.15418	1.41289	0.258715	0.731309	0.920196
ENSMUSG00000030960	Mettl10	6.26143	6.2923	5.61149	6.95548	6.25045	6.86068	6.05508	6.68887	0.633792	0.0713333	0.377226
ENSMUSG00000030966	Trim21	6.38122	7.53077	7.7913	6.86768	7.28373	7.39117	7.23443	7.18086	-0.0535721	0.615853	0.859539
ENSMUSG00000030967	Zranb1	14.7982	14.8457	14.7656	14.6354	14.6362	14.5756	14.8032	14.6157	-0.187437	0.0235918	0.178655
ENSMUSG00000030965	Fam175b	10.2531	10.4142	10.4244	10.0266	10.1337	10.286	10.3639	10.1488	-0.215164	0.0601828	0.338716
ENSMUSG00000082394	Gm4596	6.47037	6.2205	5.05739	5.70863	6.09094	6.18019	5.91609	5.99325	0.0771685	0.944526	0.987359
ENSMUSG00000070699	Sars2	7.7825	7.9488	7.52957	7.5479	8.06275	7.98463	7.75362	7.86509	0.111468	0.605214	0.853592
ENSMUSG00000004105	Angptl2	8.62273	8.84602	8.99744	8.45044	9.27677	8.44559	8.82207	8.72426	-0.0978022	0.82656	0.956911
ENSMUSG00000070697	Utp3	10.6796	10.7586	10.879	10.3996	10.5311	10.2394	10.7724	10.39	-0.382353	0.000948238	0.0162008
ENSMUSG00000070690	5830473C10Rik	9.93269	9.99192	9.58774	9.19058	9.65025	9.19727	9.83745	9.34603	-0.491416	0.00298543	0.0396158
ENSMUSG00000070691	Runx3	4.29253	3.30436	4.14618	2.4321	2.96906	0	3.91436	1.80039	-2.11397	0.10504	0.474082
ENSMUSG00000070692	Rps12-ps10	1.21929	0	1.0798	0	1.09651	1.57846	0.766365	0.891658	0.125293	0.926113	0.981761
ENSMUSG00000004100	Ppan	8.32102	8.67301	9.18027	8.57209	8.6211	8.6305	8.72477	8.6079	-0.116869	0.414916	0.817413
ENSMUSG00000096437	Rps12-ps16	1.21929	0	0	0	0	0	0.406432	0	-0.406432	0.552776	0.820333
ENSMUSG00000096433	Zfp994	7.09265	7.0951	7.33431	6.2149	6.48854	6.56019	7.17402	6.42121	-0.752808	0.00571449	0.0650564
ENSMUSG00000033703	Fuk	7.69273	8.50184	8.49035	8.15647	8.55277	7.97327	8.22831	8.2275	-0.000806498	0.911954	0.976819
ENSMUSG00000033701	Acbd6	10.0294	9.83045	9.2479	9.50476	9.945	10.1336	9.70258	9.86113	0.158549	0.468938	0.817413
ENSMUSG00000033707	Lrrc24	8.75281	9.02529	8.25291	9.14276	9.34654	9.07506	8.677	9.18812	0.511116	0.012468	0.114099
ENSMUSG00000033706	Smyd5	8.07319	8.5947	8.48587	8.59961	8.4902	8.50201	8.38459	8.53061	0.146018	0.498065	0.817413
ENSMUSG00000033705	Stard9	8.14941	7.8883	8.39333	8.36323	8.0317	7.61234	8.14368	8.00242	-0.141258	0.590575	0.84409
ENSMUSG00000037466	4930427A07Rik	3.1651	0	0	3.82684	2.14245	0	1.05503	1.98977	0.93473	0.610239	0.856519
ENSMUSG00000037465	Klf10	9.71054	10.2084	9.9168	8.93382	9.14663	9.27334	9.94526	9.11793	-0.827334	7.72e-08	4.79e-06
ENSMUSG00000037463	Fbxo27	0	0	0	0	0	3.45056	0	1.15019	1.15019	0.382555	0.817413
ENSMUSG00000037461	Ints7	9.43684	9.81021	9.52588	9.73805	9.49731	9.70621	9.59098	9.64719	0.0562152	0.757661	0.93069
ENSMUSG00000104136	Gm36955	3.69543	0	3.30888	0	0	0	2.33477	0	-2.33477	0.145621	0.569389
ENSMUSG00000031709	Tbc1d9	7.30143	6.0376	6.96145	6.18615	6.64441	5.77177	6.76683	6.20078	-0.566049	0.105752	0.475774
ENSMUSG00000031708	Tecr	12.2948	11.7592	11.7608	12.0077	12.3088	11.8132	11.9383	12.0432	0.104934	0.537162	0.820333
ENSMUSG00000031706	Rfx1	8.67524	8.42406	7.96854	7.80588	7.92762	7.82948	8.35595	7.85433	-0.501621	0.0128917	0.116715
ENSMUSG00000031701	Dnaja2	12.7001	12.649	12.7995	12.292	12.4723	12.6571	12.7162	12.4738	-0.242401	0.0230913	0.176132
ENSMUSG00000031700	Gpt2	14.1863	14.3486	14.0499	14.491	14.5836	14.7437	14.1949	14.6061	0.411188	0.000220656	0.00499424
ENSMUSG00000031703	Itfg1	11.8045	11.7555	11.8994	11.6972	11.7709	11.8164	11.8198	11.7615	-0.0582642	0.489005	0.817413
ENSMUSG00000003458	Ncstn	11.4701	11.409	11.5342	11.1677	11.2882	11.5104	11.4711	11.3221	-0.148999	0.170847	0.615858
ENSMUSG00000023008	Fmnl3	8.08029	7.1347	7.2204	7.78685	7.21906	7.40815	7.47847	7.47135	-0.00711229	0.845818	0.963853
ENSMUSG00000023004	Tuba1b	10.4372	10.1898	10.3997	10.4773	10.7896	10.6169	10.3422	10.6279	0.285713	0.0180021	0.147064
ENSMUSG00000023007	Prpf40b	7.86702	7.43884	8.06769	7.50198	7.74063	7.85446	7.79118	7.69903	-0.0921576	0.611986	0.857261
ENSMUSG00000023000	Dhh	0	0	0	0	2.4734	2.79899	0	1.75746	1.75746	0.299855	0.796929
ENSMUSG00000003452	Bicd1	0	3.77445	3.13688	4.61174	3.87386	4.94475	2.30378	4.47678	2.17301	0.0892104	0.432066
ENSMUSG00000026032	Ndufb3	10.6453	10.4733	10.6003	11.099	11.2704	11.3593	10.573	11.2429	0.669904	5.38e-10	5.28e-08
ENSMUSG00000026031	Cflar	11.9693	11.725	11.9639	11.9612	11.7596	11.9448	11.8861	11.8886	0.00245409	0.976702	0.993363
ENSMUSG00000026037	Orc2	8.09438	7.54063	7.97494	7.8153	8.00638	7.69764	7.86999	7.83977	-0.0302138	0.849621	0.964654
ENSMUSG00000026036	Nif3l1	8.77047	8.73874	8.11483	8.78358	8.62942	8.79439	8.54135	8.7358	0.194451	0.40396	0.817413
ENSMUSG00000026035	Ppil3	8.77047	8.14903	7.87582	8.81679	8.834	8.50201	8.26511	8.7176	0.452493	0.0615314	0.343825
ENSMUSG00000026034	Clk1	9.67816	9.55927	10.0333	10.3421	10.2475	10.2251	9.75691	10.2716	0.514653	0.000259204	0.00567945
ENSMUSG00000026039	Sgol2a	4.29253	0	0	0	0	0	1.43084	0	-1.43084	0.243786	0.732581
ENSMUSG00000082127	Gm13577	4.47595	4.41243	3.60139	3.66957	3.87386	3.45056	4.16326	3.66466	-0.498593	0.474452	0.817413
ENSMUSG00000087330	Bloodlinc	1.87053	0	0	0	0	0	0.623509	0	-0.623509	0.502529	0.817413
ENSMUSG00000034285	Nipsnap1	12.6926	12.4876	12.4399	12.5552	12.7379	12.6739	12.5401	12.6557	0.115629	0.276806	0.772907
ENSMUSG00000000957	Mmp14	12.1598	12.2071	12.2147	12.1526	12.1199	12.1263	12.1939	12.1329	-0.0609561	0.440603	0.817413
ENSMUSG00000073633	Fbxo36	6.42648	6.99823	6.8264	7.55916	7.21906	7.10925	6.75037	7.29582	0.545453	0.049422	0.297939
ENSMUSG00000073639	Rab18	11.9755	11.98	12.0311	12.0138	12.0079	12.2794	11.9956	12.1004	0.104809	0.30062	0.797409
ENSMUSG00000049553	Polr1a	10.3116	10.3871	10.6925	10.5197	10.3542	10.1639	10.4638	10.346	-0.117812	0.36487	0.817413
ENSMUSG00000049551	Fzd9	2.93388	3.30436	2.71561	0	1.71227	4.07827	2.98462	1.93018	-1.05444	0.843763	0.963275
ENSMUSG00000049550	Clip1	11.2713	11.214	11.3371	10.8423	10.7699	11.2669	11.2741	10.9597	-0.314413	0.018121	0.147471
ENSMUSG00000049556	Lingo1	3.69543	2.26462	4.05245	4.92181	4.8238	5.19995	3.3375	4.98186	1.64435	0.0314617	0.219083
ENSMUSG00000049555	Tmie	8.54277	8.82196	9.16356	8.94673	9.65229	8.8881	8.84276	9.16238	0.319612	0.108648	0.483396
ENSMUSG00000069678	Pcgf1	6.2862	7.0951	6.28259	6.18615	6.87177	6.83581	6.55463	6.63124	0.0766145	0.884613	0.973703
ENSMUSG00000069670	Nkain2	4.29253	4.0198	3.13688	0	0	0	3.8164	0	-3.8164	0.00972891	0.0959047
ENSMUSG00000069581	Tspear	0	2.8762	0	0	3.16489	2.31412	0.958733	1.82634	0.867603	0.699593	0.904002
ENSMUSG00000046269	Usp27x	5.9254	6.14493	6.66159	5.70863	6.01679	5.92113	6.24397	5.88218	-0.361793	0.278708	0.775472
ENSMUSG00000030816	Rnf40	10.184	10.1693	10.5227	9.94955	10.3667	10.4196	10.292	10.2453	-0.0466758	0.749003	0.92685
ENSMUSG00000022353	Mtss1	13.179	13.3628	13.4331	13.3475	13.4079	13.3075	13.325	13.3543	0.0293446	0.815352	0.951037
ENSMUSG00000022350	Washc5	10.5243	10.7135	10.6983	10.8719	10.8575	11.0435	10.6454	10.9243	0.278921	0.0120966	0.111414
ENSMUSG00000022351	Sqle	10.523	10.7102	11.5743	11.3036	10.7299	11.0994	10.9358	11.0443	0.108462	0.891305	0.975863
ENSMUSG00000076036	Gm22133	12.7541	12.585	12.1854	12.8032	13.1069	13.0351	12.5081	12.9817	0.473605	0.00079895	0.0140926
ENSMUSG00000022354	Ndufb9	12.3864	12.2913	11.9111	12.4654	12.6234	12.4183	12.1963	12.5024	0.30608	0.0203211	0.160186
ENSMUSG00000076038	Gm22774	1.87053	1.82247	1.0798	1.97497	2.14245	1.57846	1.59093	1.89863	0.307697	0.829707	0.958953
ENSMUSG00000022359	Wdyhv1	6.8148	7.60784	6.75381	7.5136	7.08032	7.26642	7.05882	7.28678	0.227963	0.542153	0.820333
ENSMUSG00000105774	Gm43006	0	1.82247	0	1.97497	0	0	0.607489	0.658323	0.0508337	0.958274	0.99074
ENSMUSG00000105775	Gm10290	1.21929	0	1.0798	1.97497	2.14245	1.57846	0.766365	1.89863	1.13226	0.494788	0.817413
ENSMUSG00000105776	Gm43292	0	3.10611	0	0	0	0	1.03537	0	-1.03537	0.452683	0.817413
ENSMUSG00000105779	Gm6439	0	0	0	1.30194	1.09651	0	0	0.799484	0.799484	0.483118	0.817413
ENSMUSG00000039384	Dusp10	7.50504	7.16051	6.2618	7.17621	6.85768	6.29414	6.97579	6.77601	-0.199776	0.492786	0.817413
ENSMUSG00000097706	E030037K01Rik	4.97964	5.69313	6.62949	5.34238	5.64242	5.1198	5.76742	5.3682	-0.399221	0.26038	0.751389
ENSMUSG00000008540	Mgst1	16.6213	16.4913	16.3861	17.1774	17.3842	17.0096	16.4996	17.1904	0.690844	3.73e-09	3.12e-07
ENSMUSG00000034863	Ano8	6.35805	5.58291	6.15311	6.09629	6.09094	5.54503	6.03136	5.91076	-0.120601	0.743303	0.924746
ENSMUSG00000034867	Ankrd27	10.0072	10.3582	10.3672	9.95169	10.1896	10.1489	10.2442	10.0967	-0.14746	0.23264	0.718571
ENSMUSG00000088022	Gm22146	1.87053	3.63411	3.60139	4.09774	1.71227	0	3.03534	1.93667	-1.09867	0.745675	0.925718
ENSMUSG00000037960	Card19	7.65519	7.91887	7.34423	7.36761	7.55223	7.49014	7.63943	7.46999	-0.169439	0.417232	0.817413
ENSMUSG00000077637	Gm22771	2.6584	3.30436	2.71561	2.4321	2.96906	0	2.89279	1.80039	-1.0924	0.598498	0.848479
ENSMUSG00000045795	Whamm	10.502	10.5535	10.2348	9.84538	10.1712	10.2745	10.4301	10.097	-0.333057	0.0160737	0.135539
ENSMUSG00000045790	Ccdc149	6.79768	6.799	7.40237	7.16151	6.09094	6.59025	6.99968	6.61423	-0.385449	0.278116	0.77486
ENSMUSG00000048154	Kmt2d	10.7855	10.6143	9.8984	10.4965	10.2676	10.0975	10.4327	10.2872	-0.14552	0.310635	0.805481
ENSMUSG00000079685	Ulbp1	4.29253	3.63411	0	0	0	0	2.64221	0	-2.64221	0.0812619	0.407915
ENSMUSG00000102202	Gm33280	4.55959	3.90233	3.60139	0	0	5.03493	4.0211	1.67831	-2.3428	0.623112	0.863345
ENSMUSG00000102205	9430092D12Rik	0	0	0	3.05797	0	2.79899	0	1.95232	1.95232	0.24232	0.731446
ENSMUSG00000089959	Gm16268	3.36433	0	2.1181	0	0	0	1.82748	0	-1.82748	0.26825	0.761859
ENSMUSG00000089958	Gm16165	3.83626	4.0198	3.72805	4.61174	4.8238	4.07827	3.86137	4.5046	0.643235	0.307046	0.803177
ENSMUSG00000089951	Gm14435	4.47595	5.03169	4.14618	5.11723	5.08801	5.1198	4.55127	5.10834	0.557074	0.348715	0.817413
ENSMUSG00000089956	Gm16553	0	0	2.1181	3.29184	0	0	0.706034	1.09728	0.391245	0.663441	0.886604
ENSMUSG00000006241	Ccdc159	6.94493	6.42601	5.85302	6.84946	7.31501	7.02373	6.40799	7.06273	0.654746	0.0621994	0.346124
ENSMUSG00000027401	Tgm3	0	0	0	0	0	3.45056	0	1.15019	1.15019	0.382555	0.817413
ENSMUSG00000042211	Fbxo38	10.4821	10.4565	10.5444	10.4639	10.3019	10.1813	10.4943	10.3157	-0.178641	0.119601	0.51065
ENSMUSG00000042210	Abhd14a	7.49445	7.31789	7.35409	7.10119	7.50781	8.1247	7.38881	7.5779	0.189089	0.378277	0.817413
ENSMUSG00000042213	Zfand4	10.4523	10.4329	10.0425	9.8292	9.81246	10.2082	10.3092	9.94995	-0.359264	0.0141047	0.124013
ENSMUSG00000042215	Bag2	6.97571	6.58694	6.51117	5.89782	5.93861	6.33021	6.69127	6.05555	-0.635729	0.0451038	0.281176
ENSMUSG00000042216	Sgsm1	5.39843	5.33347	5.64399	5.7485	5.31124	4.51422	5.45863	5.19132	-0.267307	0.7083	0.907801
ENSMUSG00000039878	Slc39a5	5.64813	4.91523	4.14618	6.49827	7.26249	6.90918	4.90318	6.88998	1.98681	3.29e-06	0.000137702
ENSMUSG00000045248	Med26	8.14941	8.02103	8.11483	8.21456	7.69381	8.37828	8.09509	8.09555	0.000461821	0.94548	0.987359
ENSMUSG00000032425	Zfp949	7.88334	8.24866	7.76937	7.8153	7.04344	7.55253	7.96712	7.47042	-0.496701	0.0485149	0.295234
ENSMUSG00000032420	Nt5e	8.05168	7.50077	7.59751	7.61415	7.83715	7.72499	7.71666	7.72543	0.00877588	0.967988	0.991642
ENSMUSG00000032423	Syncrip	10.5204	10.3596	10.4568	10.3142	10.0133	10.362	10.4456	10.2298	-0.21575	0.0796048	0.403199
ENSMUSG00000032422	Snx14	9.82272	10.1059	10.1539	9.74053	9.60668	9.6068	10.0275	9.65133	-0.376159	0.00320279	0.041889
ENSMUSG00000102779	Gm38164	0	0	2.44757	0	0	0	0.815857	0	-0.815857	0.475452	0.817413
ENSMUSG00000084822	Myadml2os	0	3.63411	0	1.97497	0	0	1.21137	0.658323	-0.553047	0.539263	0.820333
ENSMUSG00000105558	Gm5855	1.21929	2.26462	1.69041	2.4321	2.4734	2.31412	1.72478	2.40654	0.681765	0.629208	0.867219
ENSMUSG00000029090	Adgra3	11.0176	10.8664	11.0839	11.2464	11.2086	11.3439	10.9893	11.2663	0.277017	0.0074195	0.0792569
ENSMUSG00000031145	Prickle3	6.31055	6.67912	5.10485	6.98915	5.7981	5.66285	6.0315	6.15004	0.118532	0.810127	0.950539
ENSMUSG00000079575	Rbpsuh-rs3	5.82756	5.62059	6.03556	6.12687	5.88404	6.18019	5.8279	6.0637	0.235797	0.5445	0.820333
ENSMUSG00000031143	Ccdc22	8.46355	8.49171	7.84819	8.24972	8.75257	8.63772	8.26782	8.54667	0.278851	0.217997	0.695272
ENSMUSG00000029095	Ablim2	6.47037	6.62452	6.30309	6.75474	6.99276	6.18019	6.46599	6.64256	0.176572	0.487634	0.817413
ENSMUSG00000044117	2900011O08Rik	2.6584	0	0	2.77871	0	0	0.886133	0.926237	0.0401043	0.959105	0.99074
ENSMUSG00000083483	Gm14044	1.87053	1.18169	1.69041	0	0	1.57846	1.58088	0.526153	-1.05472	0.597075	0.847957
ENSMUSG00000058099	Nfam1	7.58706	6.0376	7.2733	6.81231	6.47013	5.8233	6.96598	6.36858	-0.597406	0.0796893	0.403298
ENSMUSG00000041548	Hspb8	13.7413	13.3352	13.5595	13.562	13.8232	13.8674	13.5453	13.7509	0.205529	0.0927882	0.441536
ENSMUSG00000058093	Zfp729b	8.56318	8.60414	8.63882	8.00008	8.15206	7.81683	8.60205	7.98965	-0.612392	0.000577926	0.0109005
ENSMUSG00000041540	Sox5	8.91643	8.66852	7.97494	9.34162	8.92803	9.36312	8.51996	9.21092	0.690959	0.00274185	0.0370223
ENSMUSG00000000167	Pih1d2	3.53936	2.60258	0	5.11723	0	0	2.04731	1.70574	-0.341571	0.744006	0.925252
ENSMUSG00000050640	Tmem150c	0	3.47864	0	0	3.75725	0	1.15955	1.25242	0.092871	0.89297	0.975863
ENSMUSG00000024592	C330018D20Rik	8.60315	8.58043	8.39333	8.92515	8.75257	8.72158	8.52564	8.79976	0.274125	0.0902363	0.434182
ENSMUSG00000024593	Megf10	2.31759	0	0	0	0	0	0.77253	0	-0.77253	0.481172	0.817413
ENSMUSG00000024590	Lmnb1	6.01703	6.42601	5.67577	6.84946	6.13834	6.5295	6.0396	6.50577	0.466164	0.200825	0.668916
ENSMUSG00000000168	Dlat	10.9925	11.2078	11.0125	11.2174	10.8864	11.0955	11.0709	11.0665	-0.0044906	0.955138	0.990405
ENSMUSG00000024594	Prrc1	10.5629	10.9259	10.9739	10.8719	10.8925	11.0119	10.8209	10.9254	0.104552	0.471679	0.817413
ENSMUSG00000070960	Gm19680	8.63242	7.95619	8.36924	8.58316	8.67834	8.39541	8.31928	8.5523	0.233019	0.277863	0.77444
ENSMUSG00000019179	Mdh2	12.9417	12.7479	12.7157	12.7814	13.0602	12.8905	12.8017	12.9107	0.108969	0.308879	0.803936
ENSMUSG00000032301	Psma4	11.9158	11.9604	11.7342	12.0174	12.232	12.1773	11.8701	12.1422	0.272092	0.0102336	0.0994221
ENSMUSG00000057530	Ece1	13.5228	13.5037	13.5311	13.4082	13.5488	13.4862	13.5192	13.4811	-0.0381296	0.621386	0.862209
ENSMUSG00000057531	Dtnbp1	10.2578	10.1597	10.1036	10.1638	10.1741	9.91357	10.1737	10.0838	-0.0899186	0.472416	0.817413
ENSMUSG00000032305	Fam219b	7.09265	6.76575	6.61317	6.95548	7.83715	7.49014	6.82386	7.42759	0.603733	0.0255649	0.189136
ENSMUSG00000041895	Wipi1	10.9231	11.1646	11.2827	11.5806	11.459	11.6354	11.1235	11.5583	0.434838	0.000197074	0.00457373
ENSMUSG00000041890	Git2	9.14687	9.27611	9.1324	8.98061	8.87305	9.30086	9.18513	9.05151	-0.133618	0.383697	0.817413
ENSMUSG00000041891	Lman1	14.0795	14.1741	14.4864	14.2374	14.1462	14.2596	14.2467	14.2144	-0.0322531	0.684198	0.897506
ENSMUSG00000083880	Hspe1-ps6	0	0	0	1.30194	0	0	0	0.433979	0.433979	0.518877	0.817413
ENSMUSG00000083887	Gm11930	0	0	0	0	1.09651	0	0	0.365505	0.365505	0.530725	0.820333
ENSMUSG00000083885	Gm13213	0	0	0	2.4321	0	0	0	0.810701	0.810701	0.462958	0.817413
ENSMUSG00000047492	Inhbe	10.4659	10.8868	10.6877	10.6158	10.4952	10.7342	10.6801	10.6151	-0.0650692	0.541182	0.820333
ENSMUSG00000047496	Rnf152	8.86803	9.45883	8.80969	7.21941	8.00638	8.28029	9.04552	7.83536	-1.21016	1.35e-06	6.23e-05
ENSMUSG00000047497	Adamts12	2.31759	2.8762	0	0	0	0	1.73126	0	-1.73126	0.317162	0.812998
ENSMUSG00000051118	Olfr77	6.51296	6.64295	6.2193	6.54431	6.97981	0	6.4584	4.50804	-1.95036	0.856218	0.966417
ENSMUSG00000051113	Fam71e1	3.36433	2.60258	0	3.82684	2.4734	0	1.98897	2.10008	0.111109	0.843663	0.963275
ENSMUSG00000051111	Sv2c	4.19127	4.0198	0	0	0	0	2.73702	0	-2.73702	0.0688611	0.368312
ENSMUSG00000056724	Nbeal2	8.96709	8.99333	8.90327	8.64257	8.83759	8.51774	8.95456	8.66597	-0.288596	0.0700436	0.372631
ENSMUSG00000014837	4931428F04Rik	5.15123	6.60586	5.10485	6.06505	5.22605	5.27589	5.62065	5.52233	-0.0983174	0.647928	0.87801
ENSMUSG00000000838	Fmr1	9.16367	9.50742	9.32258	9.35782	9.18663	9.70277	9.33122	9.41574	0.0845202	0.607312	0.854821
ENSMUSG00000105550	Gm42586	3.36433	0	2.1181	0	0	3.45056	1.82748	1.15019	-0.677293	0.853914	0.965404
ENSMUSG00000066113	Adamtsl1	5.15123	3.90233	4.60813	5.17689	6.16147	6.56019	4.5539	5.96619	1.41229	0.0048447	0.0571464
ENSMUSG00000066116	Gm10154	5.95659	6.00947	5.61149	6.49827	6.16147	5.96767	5.85919	6.20914	0.349953	0.319182	0.815265
ENSMUSG00000024261	Syt4	0	3.30436	4.31713	0	0	0	2.5405	0	-2.5405	0.0921388	0.43936
ENSMUSG00000082289	Gm15596	0	1.18169	1.0798	0	1.09651	0	0.753831	0.365505	-0.388326	0.815393	0.951037
ENSMUSG00000082286	Pisd-ps1	8.49045	8.65042	8.67071	9.41159	8.41039	7.73847	8.60386	8.52015	-0.0837065	0.8711	0.970957
ENSMUSG00000082284	H3f3a-ps1	2.6584	3.10611	2.44757	3.05797	2.74241	2.31412	2.73736	2.70483	-0.0325255	0.98442	0.995261
ENSMUSG00000098825	Gm27285	0	0	0	1.30194	0	0	0	0.433979	0.433979	0.518877	0.817413
ENSMUSG00000098824	Mir7006	1.21929	1.18169	0	1.30194	0	1.57846	0.800329	0.960132	0.159803	0.913261	0.9769
ENSMUSG00000098826	Mir7677	1.21929	1.18169	0	1.30194	0	0	0.800329	0.433979	-0.36635	0.847426	0.964077
ENSMUSG00000080615	Snord99	0	1.18169	0	1.30194	1.09651	0	0.393897	0.799484	0.405587	0.80202	0.947285
ENSMUSG00000105552	Gm19710	1.21929	2.26462	0	0	0	0	1.16131	0	-1.16131	0.470115	0.817413
ENSMUSG00000085395	Gm13056	2.31759	0	0	0	3.63038	4.38302	0.77253	2.67113	1.8986	0.165382	0.606794
ENSMUSG00000085396	Firre	8.18935	8.34748	8.16607	8.77396	8.67433	7.9959	8.2343	8.48139	0.247095	0.168747	0.613298
ENSMUSG00000085399	Foxd2os	2.6584	2.60258	0	0	4.08213	0	1.75366	1.36071	-0.392949	0.748736	0.926698
ENSMUSG00000085398	4931406G06Rik	2.93388	0	0	0	0	0	0.977961	0	-0.977961	0.46166	0.817413
ENSMUSG00000098790	Mir6942	1.21929	1.82247	1.0798	2.4321	0	1.57846	1.37385	1.33685	-0.0369996	0.88776	0.975166
ENSMUSG00000098798	Gm27288	1.21929	1.18169	1.0798	1.30194	1.09651	1.57846	1.16026	1.32564	0.165375	0.910165	0.975863
ENSMUSG00000065778	Gm22154	0	2.26462	0	1.97497	1.09651	0	0.754874	1.02383	0.268954	0.973765	0.992703
ENSMUSG00000065773	Rnu1b6	0	0	0	0	1.09651	0	0	0.365505	0.365505	0.530725	0.820333
ENSMUSG00000106069	Gm6135	4.91759	4.41243	3.13688	3.49303	0	4.51422	4.15563	2.66908	-1.48655	0.40373	0.817413
ENSMUSG00000057181	5730455P16Rik	9.19997	9.60229	9.69825	9.46343	9.63587	9.57333	9.50017	9.55754	0.0573753	0.797101	0.94634
ENSMUSG00000106063	C030032O16Rik	0	2.26462	0	0	0	0	0.754874	0	-0.754874	0.482514	0.817413
ENSMUSG00000106062	Gm43820	2.6584	1.82247	0	2.77871	0	2.31412	1.49362	1.69761	0.203989	0.884463	0.973703
ENSMUSG00000106067	Gm7902	5.79341	6.14493	5.23854	5.05498	5.08801	5.54503	5.72563	5.22934	-0.496286	0.228842	0.713006
ENSMUSG00000094743	Mup-ps7	0	1.18169	2.1181	2.4321	2.4734	0	1.09993	1.63517	0.535235	0.684234	0.897506
ENSMUSG00000061461	Smim20	8.00022	8.35308	7.7913	8.81679	8.26848	8.85754	8.0482	8.6476	0.599398	0.00551879	0.0632695
ENSMUSG00000061462	Obscn	0	3.30436	0	0	0	0	1.10145	0	-1.10145	0.415912	0.817413
ENSMUSG00000093919	Gm20760	0	1.18169	0	0	0	1.57846	0.393897	0.526153	0.132256	0.898407	0.975863
ENSMUSG00000093916	Gm379	0	0	1.69041	1.30194	2.14245	0	0.56347	1.14813	0.58466	0.746692	0.925903
ENSMUSG00000093910	Zfp853	0	0	1.69041	0	0	0	0.56347	0	-0.56347	0.511179	0.817413
ENSMUSG00000093912	Mir3470b	0	0	1.69041	0	0	0	0.56347	0	-0.56347	0.511179	0.817413
ENSMUSG00000016528	Mapkapk2	11.7878	11.7438	11.5916	11.8766	11.4413	11.7777	11.7077	11.6986	-0.00914774	0.969497	0.991709
ENSMUSG00000016526	Dyrk3	5.75844	5.28735	4.90484	3.05797	3.16489	4.38302	5.31688	3.53529	-1.78159	0.00583306	0.0659456
ENSMUSG00000016520	Lnx2	10.0692	9.96836	10.2716	10.0467	10.269	10.4871	10.1031	10.2676	0.164537	0.227823	0.711349
ENSMUSG00000081221	Gm14760	8.96325	8.6595	8.67465	8.83078	8.95144	8.91803	8.7658	8.90009	0.134288	0.418696	0.817413
ENSMUSG00000081223	Gm12247	3.69543	4.0198	2.1181	5.2893	5.39168	5.27589	3.27778	5.31896	2.04118	0.00412639	0.0507147
ENSMUSG00000081227	Gm13082	2.6584	2.8762	4.31713	2.77871	2.14245	4.51422	3.28391	3.14513	-0.13878	0.977835	0.993363
ENSMUSG00000081228	Gm16089	6.38122	5.4215	5.67577	6.2149	6.78508	6.33021	5.82616	6.4434	0.617233	0.117323	0.504467
ENSMUSG00000085936	2610307P16Rik	1.87053	1.82247	0	2.77871	3.75725	2.79899	1.231	3.11165	1.88065	0.178715	0.631344
ENSMUSG00000085939	Cd63-ps	3.1651	3.63411	0	4.61174	3.49126	0	2.2664	2.701	0.434594	0.564617	0.824369
ENSMUSG00000053603	4930442H23Rik	0	0	0	1.97497	0	0	0	0.658323	0.658323	0.478676	0.817413
ENSMUSG00000053604	Rpia	6.63367	7.40685	7.49436	7.60332	7.56096	7.97327	7.17829	7.71252	0.534224	0.0672409	0.362701
ENSMUSG00000046101	Mcmdc2	3.69543	0	2.1181	0	0	0	1.93785	0	-1.93785	0.222715	0.702236
ENSMUSG00000105452	Gm5276	0	0	0	3.29184	2.96906	0	0	2.08697	2.08697	0.193695	0.656742
ENSMUSG00000036138	Acaa1a	12.3717	12.0878	11.8601	12.2024	12.4476	12.2509	12.1065	12.3003	0.193735	0.164128	0.605057
ENSMUSG00000099041	Gm28035	7.73831	6.95463	7.94265	8.75939	9.76418	8.86984	7.5452	9.13114	1.58594	2.72e-09	2.36e-07
ENSMUSG00000106990	Gm42547	6.49182	5.33347	7.02452	6.88567	6.3744	7.10925	6.28327	6.78977	0.506501	0.342045	0.817413
ENSMUSG00000103999	Gm38026	0	2.60258	0	0	0	0	0.867526	0	-0.867526	0.470403	0.817413
ENSMUSG00000107005	Gm42631	0	2.26462	1.0798	0	0	0	1.11481	0	-1.11481	0.471577	0.817413
ENSMUSG00000078300	Gm2606	8.11526	7.95619	7.93611	8.0165	8.06888	8.08303	8.00252	8.05614	0.053615	0.793658	0.944949
ENSMUSG00000051934	Spats2	7.37254	8.01397	7.6624	7.74804	7.81545	7.72499	7.68297	7.76283	0.0798558	0.815918	0.951271
ENSMUSG00000049038	Mterf2	5.09627	5.65732	4.9575	4.21623	5.50451	5.34803	5.23703	5.02292	-0.214104	0.775829	0.938284
ENSMUSG00000096633	Gm22170	0	0	0	1.97497	0	0	0	0.658323	0.658323	0.478676	0.817413
ENSMUSG00000096631	Gm22171	0	1.18169	0	0	0	0	0.393897	0	-0.393897	0.55464	0.820333
ENSMUSG00000096635	Gm22174	0	0	0	0	1.09651	0	0	0.365505	0.365505	0.530725	0.820333
ENSMUSG00000052426	Gm9877	0	0	0	0	2.14245	0	0	0.714151	0.714151	0.470548	0.817413
ENSMUSG00000037669	Ldah	10.3025	9.94442	10.0163	10.2941	10.4906	10.3577	10.0878	10.3808	0.293026	0.0242213	0.182138
ENSMUSG00000097329	4931403G20Rik	0	0	0	2.4321	0	2.79899	0	1.7437	1.7437	0.306379	0.802822
ENSMUSG00000097328	Tnfsf12	7.61665	8.01397	8.29444	8.4383	8.4007	8.38687	7.97502	8.40862	0.433601	0.0466744	0.287905
ENSMUSG00000037664	Cdkn1c	5.25524	5.4215	5.73731	5.2893	5.31124	6.01275	5.47135	5.53776	0.0664164	0.872619	0.971292
ENSMUSG00000097325	Gm16897	2.31759	0	0	0	0	2.79899	0.77253	0.932996	0.160467	0.872969	0.971292
ENSMUSG00000037660	Gdf7	0	0	0	2.4321	0	0	0	0.810701	0.810701	0.462958	0.817413
ENSMUSG00000037661	Gpr160	2.93388	6.2205	6.17551	6.18615	5.93861	5.77177	5.10997	5.96551	0.855546	0.623363	0.863536
ENSMUSG00000097321	1700028E10Rik	7.63605	7.62648	7.6624	6.921	7.87962	7.35662	7.64165	7.38574	-0.255903	0.440312	0.817413
ENSMUSG00000097320	Tmem147os	4.19127	5.79552	3.13688	5.7485	4.34713	3.89778	4.37455	4.66447	0.289914	0.881529	0.973093
ENSMUSG00000015476	Prrt1	3.53936	0	0	0	4.98805	3.16125	1.17979	2.71643	1.53665	0.295935	0.793711
ENSMUSG00000092741	Mir3074-1	3.69543	2.60258	3.60139	3.96864	3.33728	4.51422	3.2998	3.94005	0.640249	0.452849	0.817413
ENSMUSG00000092746	Rn7s6	7.28923	7.74211	5.10485	6.6322	8.18064	7.10925	6.71206	7.30736	0.595297	0.649213	0.878686
ENSMUSG00000092745	Mir5122	1.21929	1.18169	1.0798	1.30194	1.09651	1.57846	1.16026	1.32564	0.165375	0.910165	0.975863
ENSMUSG00000111339	00R_Pgap2	3.69543	0	3.72805	3.96864	2.74241	3.69143	2.47449	3.46749	0.993	0.731749	0.920196
ENSMUSG00000096981	Gm16845	3.96455	3.47864	3.72805	4.61174	2.14245	3.69143	3.72374	3.48187	-0.241871	0.953478	0.989872
ENSMUSG00000039716	Dock3	1.87053	2.60258	0	1.30194	2.96906	2.31412	1.49103	2.19504	0.704005	0.716768	0.911815
ENSMUSG00000039715	Wdr34	7.14774	7.18587	7.55542	7.72823	7.62891	7.4415	7.29635	7.59955	0.303203	0.204714	0.674772
ENSMUSG00000039713	Plekhg5	7.69273	7.681	7.31426	6.81231	6.7999	7.49014	7.56266	7.03411	-0.528549	0.0495923	0.29853
ENSMUSG00000090674	Gm17082	1.87053	2.60258	2.1181	1.30194	3.49126	2.31412	2.19707	2.36911	0.172038	0.727773	0.918404
ENSMUSG00000087691	Gm15674	5.89352	5.23972	4.90484	4.77509	3.98175	4.84855	5.34602	4.53513	-0.810893	0.12185	0.516057
ENSMUSG00000078813	Leng1	9.15025	8.60884	8.94625	8.89881	8.66222	9.15264	8.90178	8.90456	0.00278118	0.960721	0.990848
ENSMUSG00000023243	Kcnk5	11.7269	11.4462	11.5536	10.0567	11.1946	11.0583	11.5755	10.7699	-0.80567	0.0329588	0.225986
ENSMUSG00000015766	Eps8	6.57458	6.31547	6.92225	3.82684	6.52466	5.19995	6.6041	5.18382	-1.42028	0.0381301	0.250692
ENSMUSG00000067049	Unc93a	4.19127	4.4959	2.94157	0	3.87386	4.38302	3.87625	2.75229	-1.12395	0.660281	0.885332
ENSMUSG00000023249	Parp3	9.38905	9.53728	9.38639	9.35782	9.45113	9.64309	9.43757	9.48402	0.0464442	0.756077	0.929979
ENSMUSG00000019433	Gipc1	8.00769	7.71624	7.57241	7.92376	8.16928	7.30318	7.76544	7.79874	0.0332963	0.759868	0.932148
ENSMUSG00000056043	Rgs9bp	0	0	0	0	2.14245	0	0	0.714151	0.714151	0.470548	0.817413
ENSMUSG00000112449	Srp54a	9.66169	10.1371	10.3364	10.8977	10.9493	11.0543	10.0451	10.9671	0.92199	1.84e-09	1.63e-07
ENSMUSG00000112442	RP23-380K24.4	0	2.26462	0	0	3.49126	3.16125	0.754874	2.2175	1.46263	0.347948	0.817413
ENSMUSG00000112443	RP23-340O18.4	2.93388	0	0	0	0	2.31412	0.977961	0.771374	-0.206587	0.812257	0.950687
ENSMUSG00000112441	RP23-135A22.4	3.36433	2.26462	0	4.32573	0	0	1.87632	1.44191	-0.434409	0.775274	0.937911
ENSMUSG00000031543	Ank1	2.6584	1.18169	3.95221	0	0	0	2.59743	0	-2.59743	0.107892	0.482043
ENSMUSG00000050323	Ndufaf6	8.64205	8.43468	8.44035	8.50965	8.41039	8.40389	8.50569	8.44131	-0.0643798	0.675373	0.893462
ENSMUSG00000000440	Pparg	8.63724	8.80978	8.71345	9.32852	9.76229	9.9488	8.72016	9.67987	0.959711	4.85e-09	3.98e-07
ENSMUSG00000031540	Kat6a	10.7952	10.8196	10.8841	11.0619	10.9991	10.9098	10.833	10.9903	0.157321	0.117023	0.504267
ENSMUSG00000055134	9130017K11Rik	0	0	2.44757	0	0	0	0.815857	0	-0.815857	0.475452	0.817413
ENSMUSG00000031546	Gins4	9.48844	9.38412	8.9943	9.20499	9.31595	9.17265	9.28895	9.23119	-0.0577588	0.643663	0.875061
ENSMUSG00000031545	Gpat4	13.7063	13.301	13.4887	12.77	12.9337	12.9741	13.4987	12.8926	-0.606102	3.45e-08	2.33e-06
ENSMUSG00000055137	Sugct	8.81795	8.96432	8.81326	9.29188	9.45582	9.65024	8.86518	9.46598	0.600804	4.54e-05	0.00134487
ENSMUSG00000031549	Ido2	11.3803	11.7131	11.6552	12.0102	12.081	12.176	11.5828	12.0891	0.506246	6.82e-06	0.000264774
ENSMUSG00000031548	Sfrp1	6.91348	5.23972	5.64399	6.27074	5.64242	5.48231	5.9324	5.79849	-0.133911	0.560587	0.823631
ENSMUSG00000097589	Dleu2	8.67992	8.49171	8.06169	8.61587	8.41039	8.34341	8.41111	8.45656	0.0454482	0.890712	0.975784
ENSMUSG00000106847	Peg13	8.02985	7.93391	7.94917	8.46846	8.22523	8.51774	7.97098	8.40381	0.432829	0.0174993	0.144174
ENSMUSG00000097585	E230029C05Rik	3.36433	2.60258	4.46996	5.05498	5.39168	4.63448	3.47896	5.02705	1.54809	0.0419705	0.267852
ENSMUSG00000062175	Tgif2	3.96455	0	0	0	2.96906	0	1.32152	0.989686	-0.33183	0.676889	0.894484
ENSMUSG00000091989	Ndufab1-ps	5.7226	4.32383	4.5407	4.77509	5.39168	6.05647	4.86238	5.40775	0.545371	0.372911	0.817413
ENSMUSG00000025979	Mob4	10.5191	10.1898	10.6935	11.9	11.261	11.7254	10.4675	11.6288	1.16135	1.46e-13	2.33e-11
ENSMUSG00000025978	Rftn2	4.78485	4.4959	5.43703	4.21623	5.35202	4.51422	4.90593	4.69416	-0.211769	0.763173	0.933468
ENSMUSG00000025977	Boll	1.87053	0	0	0	0	0	0.623509	0	-0.623509	0.502529	0.817413
ENSMUSG00000030208	Emp1	6.01703	5.37815	7.03681	6.65336	6.45148	5.66285	6.144	6.2559	0.111901	0.977388	0.993363
ENSMUSG00000056445	Hoxaas2	3.1651	0	0	4.09774	5.73783	0	1.05503	3.27852	2.22349	0.430646	0.817413
ENSMUSG00000021087	Rtn1	7.10662	6.62452	6.24071	5.89782	6.22871	6.01275	6.65728	6.04643	-0.610856	0.0601427	0.338636
ENSMUSG00000099757	BE692007	6.18447	5.08658	0	4.92181	5.76828	4.38302	3.75702	5.02437	1.26735	0.984736	0.99535
ENSMUSG00000022191	Drosha	9.24172	9.17209	10.0333	9.46642	9.72396	9.82787	9.48237	9.67275	0.190376	0.484441	0.817413
ENSMUSG00000022194	Pabpn1	10.6843	11.2009	11.334	11.5625	11.0339	10.7292	11.0731	11.1085	0.0354836	0.876502	0.972202
ENSMUSG00000022195	6030458C11Rik	9.26993	9.47435	9.39119	9.6221	9.58546	9.67149	9.37849	9.62635	0.247858	0.060246	0.33894
ENSMUSG00000022197	Pdzd2	6.18447	5.33347	6.19758	6.52148	6.41345	6.18019	5.90517	6.37171	0.466535	0.244001	0.732581
ENSMUSG00000022199	Slc22a17	0	4.22943	3.13688	3.05797	0	5.19995	2.45544	2.75264	0.297203	0.610889	0.856798
ENSMUSG00000093167	Mir5131	1.21929	0	1.0798	0	0	1.57846	0.766365	0.526153	-0.240211	0.926871	0.982114
ENSMUSG00000093162	Gm22184	0	1.18169	0	0	0	0	0.393897	0	-0.393897	0.55464	0.820333
ENSMUSG00000105572	Gm43300	0	4.4959	2.71561	0	2.14245	2.31412	2.40384	1.48553	-0.918313	0.293112	0.789785
ENSMUSG00000110175	Gm18255	0	1.82247	0	0	2.14245	0	0.607489	0.714151	0.106663	0.907844	0.975863
ENSMUSG00000110177	Gm6524	0	0	0	1.30194	0	0	0	0.433979	0.433979	0.518877	0.817413
ENSMUSG00000103932	Gm36963	3.1651	3.30436	3.30888	4.21623	3.98175	3.16125	3.25945	3.78641	0.526963	0.470677	0.817413
ENSMUSG00000103933	Gm36964	1.21929	1.82247	1.0798	1.30194	2.74241	0	1.37385	1.34812	-0.0257378	0.804918	0.948529
ENSMUSG00000103935	AY702102	2.6584	0	0	0	2.96906	0	0.886133	0.989686	0.103553	0.89326	0.975863
ENSMUSG00000030206	Gsg1	0	0	2.71561	0	0	0	0.905204	0	-0.905204	0.467025	0.817413
ENSMUSG00000059142	Zfp945	7.37254	7.58896	7.45826	7.46656	7.04344	6.93283	7.47325	7.14761	-0.325643	0.206516	0.678317
ENSMUSG00000029678	Hyal5	1.87053	0	3.84448	2.77871	0	0	1.905	0.926237	-0.978764	0.531636	0.820333
ENSMUSG00000029679	Hyal6	4.97964	4.12842	2.71561	0	0	0	3.94122	0	-3.94122	0.00468434	0.0559769
ENSMUSG00000029670	Ing3	8.8598	8.92721	8.85897	8.68941	8.50384	8.25236	8.88199	8.48187	-0.400121	0.0189022	0.151829
ENSMUSG00000029672	Fam3c	9.48577	9.65997	10.248	9.94097	9.77921	9.69242	9.79793	9.8042	0.00627345	0.85837	0.967141
ENSMUSG00000029673	Auts2	5.09627	2.60258	4.79337	4.52256	4.26409	2.79899	4.16407	3.86188	-0.302195	0.569671	0.828257
ENSMUSG00000029674	Limk1	7.34922	7.24738	7.63841	7.26136	7.47125	7.35662	7.41167	7.36308	-0.0485948	0.800373	0.946701
ENSMUSG00000029675	Eln	5.64813	3.90233	5.10485	5.34238	5.64242	3.45056	4.8851	4.81179	-0.0733183	0.934119	0.984054
ENSMUSG00000029676	Pot1a	6.15788	7.21079	6.2618	7.17621	7.03094	6.88514	6.54349	7.03076	0.487269	0.213615	0.687593
ENSMUSG00000038145	Snrk	11.8252	11.2301	11.797	12.6687	12.4887	12.226	11.6174	12.4611	0.843695	2.99e-08	2.1e-06
ENSMUSG00000038146	Notch3	7.38406	7.21079	7.82003	7.88851	7.6038	8.00708	7.47163	7.83313	0.361504	0.150337	0.579126
ENSMUSG00000038147	Cd84	8.11526	6.8315	8.07962	7.83395	6.81456	7.15018	7.67546	7.26623	-0.409233	0.1681	0.6121
ENSMUSG00000038141	Tmem181a	7.39549	7.72492	7.55542	7.67749	6.85768	7.20947	7.55861	7.24821	-0.310393	0.273747	0.768401
ENSMUSG00000038143	Stox2	6.26143	6.26876	5.43703	6.40155	5.85596	4.63448	5.98908	5.63066	-0.358414	0.627219	0.865678
ENSMUSG00000072847	A530017D24Rik	6.8975	7.06808	7.17665	6.97241	6.67688	6.59025	7.04741	6.74651	-0.300894	0.269044	0.762597
ENSMUSG00000072844	G530011O06Rik	3.96455	2.60258	3.46253	0	3.16489	3.16125	3.34322	2.10871	-1.23451	0.477625	0.817413
ENSMUSG00000072849	Serpina1e	17.8037	18.0736	17.9372	17.7299	18.1532	17.659	17.9382	17.8474	-0.0907646	0.545347	0.820333
ENSMUSG00000028108	Ecm1	10.9408	10.9353	10.5626	9.2014	10.2367	9.79276	10.8129	9.74361	-1.06927	1.26e-07	7.42e-06
ENSMUSG00000025359	Pmel	3.96455	0	0	3.96864	0	0	1.32152	1.32288	0.0013643	0.992555	0.997049
ENSMUSG00000025358	Cdk2	9.03076	9.15935	8.93972	8.15647	8.19752	8.56391	9.04327	8.30597	-0.737308	1.21e-05	0.000436623
ENSMUSG00000028101	Pias3	7.37254	7.681	7.14294	7.65669	7.99355	7.58274	7.39883	7.74433	0.345498	0.148022	0.574485
ENSMUSG00000028100	Nudt17	0	0	3.30888	0	2.74241	0	1.10296	0.914137	-0.188822	0.829307	0.958828
ENSMUSG00000025351	Cd63	5.68584	5.92163	6.32329	6.47469	5.76828	6.29414	5.97692	6.17904	0.202117	0.601935	0.851053
ENSMUSG00000028102	Pex11b	8.55301	9.16254	8.60208	8.96377	8.68235	8.60129	8.77254	8.74913	-0.0234094	0.814617	0.951037
ENSMUSG00000025357	Dgka	8.07319	7.79251	7.95565	7.74804	8.05041	8.25236	7.94045	8.01694	0.0764867	0.700252	0.904526
ENSMUSG00000028104	Polr3gl	7.7825	7.40685	7.04899	8.64257	8.69825	8.38687	7.41278	8.57589	1.16311	1.46e-07	8.36e-06
ENSMUSG00000028107	Tars2	9.4911	9.53481	9.4726	9.54494	9.82157	9.78629	9.4995	9.7176	0.218095	0.0898208	0.433279
ENSMUSG00000025354	Dnajc14	11.109	11.2766	11.0471	10.0447	10.6131	11.4916	11.1442	10.7165	-0.427756	0.456389	0.817413
ENSMUSG00000109090	Gm45088	0	1.18169	0	0	0	0	0.393897	0	-0.393897	0.55464	0.820333
ENSMUSG00000109093	Gm19950	8.54277	9.06342	6.49345	9.12014	9.01314	8.73509	8.03321	8.95612	0.922912	0.403179	0.817413
ENSMUSG00000109097	Gm44536	0	0	0	2.4321	0	0	0	0.810701	0.810701	0.462958	0.817413
ENSMUSG00000109096	Gm44888	0	2.8762	2.94157	0	1.71227	0	1.93926	0.570755	-1.3685	0.39114	0.817413
ENSMUSG00000093508	Mir5709	0	1.18169	0	0	0	0	0.393897	0	-0.393897	0.55464	0.820333
ENSMUSG00000062825	Actg1	10.5867	10.3071	10.5868	10.9941	10.9334	11.1868	10.4935	11.0381	0.544576	4.65e-06	0.000186718
ENSMUSG00000062822	4833420G17Rik	9.60376	9.63026	9.67091	9.28173	9.47671	9.11696	9.63498	9.2918	-0.343179	0.0140651	0.123807
ENSMUSG00000111496	RP23-331E5.10	5.52867	5.82809	5.85302	5.62541	5.54024	5.27589	5.73659	5.48051	-0.256081	0.532191	0.820333
ENSMUSG00000111497	RP23-186O3.11	1.87053	6.8315	8.02515	4.69572	1.09651	2.31412	5.57572	2.70212	-2.8736	0.108357	0.482807
ENSMUSG00000111491	RP23-360L22.2	0	1.82247	0	0	0	0	0.607489	0	-0.607489	0.504143	0.817413
ENSMUSG00000049957	Ccdc137	7.16119	7.30638	7.24179	7.50198	7.6038	7.26642	7.23646	7.4574	0.220947	0.321939	0.816455
ENSMUSG00000085812	Gm15843	1.21929	1.18169	1.0798	1.30194	1.09651	0	1.16026	0.799484	-0.360778	0.878386	0.972202
ENSMUSG00000042148	Cox10	10.3808	10.3803	10.4384	10.5913	10.32	10.5836	10.3998	10.4983	0.0984849	0.395062	0.817413
ENSMUSG00000052214	Opa3	10.7844	10.8084	10.8696	10.9605	11.1692	10.8302	10.8208	10.9866	0.165866	0.128304	0.529429
ENSMUSG00000106676	Gm42895	1.21929	2.8762	2.1181	0	1.71227	0	2.0712	0.570755	-1.50044	0.414506	0.817413
ENSMUSG00000085811	Cep112it	0	0	0	0	1.09651	0	0	0.365505	0.365505	0.530725	0.820333
ENSMUSG00000087644	Gm14703	5.20418	5.23972	3.72805	4.52256	2.96906	5.1198	4.72398	4.2038	-0.520176	0.513001	0.817413
ENSMUSG00000103065	Gm20236	2.93388	3.63411	1.0798	1.97497	2.4734	0	2.54926	1.48279	-1.06648	0.442292	0.817413
ENSMUSG00000060807	Serpina6	13.4531	13.0973	12.924	13.5838	13.5095	13.5375	13.1581	13.5436	0.385469	0.00314347	0.0412749
ENSMUSG00000052681	Rap1b	11.4172	11.1654	11.3334	11.1248	11.2657	11.2739	11.3053	11.2215	-0.08385	0.386025	0.817413
ENSMUSG00000071303	Rps8-ps1	3.83626	4.32383	3.84448	3.82684	4.08213	4.23868	4.00152	4.04922	0.0476941	0.965997	0.991642
ENSMUSG00000071302	2610044O15Rik8	6.21059	6.799	6.52868	7.34177	7.01833	6.78474	6.51275	7.04828	0.535524	0.0707262	0.375259
ENSMUSG00000068706	Gm10250	8.327	8.34748	7.82003	8.20743	8.16356	8.17514	8.16483	8.18204	0.0172101	0.979779	0.993746
ENSMUSG00000019880	Rspo3	7.74726	7.32932	8.05567	7.94108	7.96096	7.75183	7.71075	7.88462	0.173875	0.519652	0.817876
ENSMUSG00000019883	Echdc1	10.5347	10.5883	10.6828	10.7835	10.6173	11.0677	10.6019	10.8229	0.220904	0.0742313	0.386544
ENSMUSG00000019888	Mgat4c	2.31759	0	0	0	0	0	0.77253	0	-0.77253	0.481172	0.817413
ENSMUSG00000019889	Ptprk	11.9414	11.5627	11.9227	10.9402	10.9559	11.1111	11.8089	11.0024	-0.806508	2.92e-12	3.97e-10
ENSMUSG00000088442	Gm23553	0	1.18169	0	1.30194	0	0	0.393897	0.433979	0.0400817	0.95925	0.99074
ENSMUSG00000053164	Gpr21	2.93388	3.63411	0	0	2.14245	3.69143	2.18933	1.94463	-0.244703	0.868686	0.970054
ENSMUSG00000053168	9030619P08Rik	4.78485	4.72075	0	8.16386	7.69381	7.58274	3.16853	7.81347	4.64494	0.0266857	0.195163
ENSMUSG00000018287	Spag7	9.38905	9.00406	8.80969	9.24038	9.0723	9.4394	9.0676	9.25069	0.183093	0.344	0.817413
ENSMUSG00000018286	Psmb6	12.4222	12.2298	12.0735	12.3527	12.3665	12.2626	12.2418	12.3273	0.0854436	0.479671	0.817413
ENSMUSG00000024758	Rtn3	12.3299	12.2195	12.3569	12.3531	12.3408	12.3956	12.3021	12.3632	0.0610914	0.514482	0.817413
ENSMUSG00000024759	Atl3	12.3432	12.4097	12.5312	12.6826	12.5187	12.6813	12.4281	12.6275	0.19948	0.0407005	0.262606
ENSMUSG00000021508	Cxcl14	3.96455	4.32383	4.23419	0	0	0	4.17419	0	-4.17419	0.00247835	0.0343989
ENSMUSG00000021509	Slc25a48	8.64205	8.41337	8.53435	8.7496	8.90766	8.70107	8.52992	8.78611	0.256187	0.107088	0.479827
ENSMUSG00000021500	Ddx46	10.2625	10.5026	10.415	10.2857	10.1468	10.3879	10.3934	10.2735	-0.119947	0.285726	0.783467
ENSMUSG00000021501	Caml	9.42015	9.00762	9.05295	9.16871	9.22006	9.16767	9.16024	9.18548	0.0252396	0.939188	0.985414
ENSMUSG00000074874	Ctla2b	6.23623	5.37815	5.90757	6.15681	4.63841	4.07827	5.84065	4.95783	-0.882818	0.231522	0.716475
ENSMUSG00000074876	Spata5l1	7.79118	6.99823	7.69378	7.21941	7.54346	7.75183	7.4944	7.5049	0.0105053	0.935764	0.984071
ENSMUSG00000065603	Mir218-1	0	0	0	0	1.71227	0	0	0.570755	0.570755	0.488149	0.817413
ENSMUSG00000086119	Gm2415	4.7136	0	4.5407	3.29184	3.16489	4.38302	3.08477	3.61325	0.528481	0.710896	0.908846
ENSMUSG00000086111	Gm15326	2.6584	0	0	0	0	0	0.886133	0	-0.886133	0.469268	0.817413
ENSMUSG00000036275	9530068E07Rik	12.853	12.8643	12.9167	12.429	12.3443	12.5417	12.878	12.4383	-0.439689	7.92e-07	3.84e-05
ENSMUSG00000036270	Edc4	8.94393	9.05656	8.81683	9.30865	9.12913	8.72158	8.9391	9.05312	0.114016	0.440124	0.817413
ENSMUSG00000036273	Lrrk2	5.35226	6.09226	3.60139	5.2893	5.93861	5.34803	5.0153	5.52531	0.510009	0.693158	0.901241
ENSMUSG00000036278	Macrod1	10.1922	9.66674	9.56671	9.94097	10.0463	9.62868	9.80855	9.87199	0.0634398	0.780168	0.939654
ENSMUSG00000022972	1110004E09Rik	8.46897	8.54658	8.49035	8.40125	8.35127	8.21427	8.50197	8.32226	-0.179701	0.281241	0.778048
ENSMUSG00000022973	Synj1	9.62818	9.24025	9.50613	9.46043	9.33132	9.53521	9.45819	9.44232	-0.0158638	0.843556	0.963275
ENSMUSG00000022971	Ifnar2	10.7525	10.7586	10.5951	10.6158	10.3951	10.3879	10.7021	10.4663	-0.235813	0.0387462	0.253285
ENSMUSG00000022974	Paxbp1	8.80087	8.94959	8.73246	9.0738	8.59585	8.65914	8.82764	8.77627	-0.0513715	0.810453	0.950539
ENSMUSG00000022978	Mis18a	6.13079	6.52868	6.19758	6.84946	6.50671	5.19995	6.28568	6.18537	-0.100307	0.888638	0.975579
ENSMUSG00000112021	RP23-473N3.4	1.87053	0	0	0	0	0	0.623509	0	-0.623509	0.502529	0.817413
ENSMUSG00000112022	RP24-226N22.1	0	5.19045	4.5407	0	5.57511	5.92113	3.24372	3.83208	0.588364	0.717188	0.912005
ENSMUSG00000041132	N4bp2l1	11.7212	11.5021	11.186	10.9381	11.1685	11.5123	11.4698	11.2063	-0.263502	0.0827943	0.412708
ENSMUSG00000027221	Chst1	4.08236	0	2.1181	0	4.88065	3.16125	2.06682	2.68063	0.613814	0.525969	0.820333
ENSMUSG00000041135	Ripk2	9.04534	8.78095	8.89316	8.4383	8.17497	8.04012	8.90649	8.2178	-0.688689	7.4e-05	0.00201661
ENSMUSG00000027222	Pex16	11.0287	10.8546	10.791	11.0157	11.1649	11.2831	10.8914	11.1546	0.263139	0.0206694	0.162316
ENSMUSG00000027227	Sord	15.746	15.646	15.2407	15.7215	15.8633	15.6035	15.5442	15.7295	0.185226	0.203001	0.672358
ENSMUSG00000098604	Gm27295	1.87053	0	0	0	0	0	0.623509	0	-0.623509	0.502529	0.817413
ENSMUSG00000077019	Gm22191	0	0	0	0	1.09651	0	0	0.365505	0.365505	0.530725	0.820333
ENSMUSG00000004730	Adgre1	10.4233	8.35867	9.33258	7.698	8.5916	7.73847	9.37151	8.00936	-1.36215	0.0190643	0.152702
ENSMUSG00000040928	S100pbp	9.59883	9.38959	8.95922	8.79791	8.43433	8.78142	9.31588	8.67122	-0.644659	0.00032225	0.00682096
ENSMUSG00000098602	Mir6946	1.21929	2.26462	1.0798	1.30194	1.09651	1.57846	1.52124	1.32564	-0.195601	0.838294	0.961592
ENSMUSG00000029994	Anxa4	10.5165	10.7511	10.5941	10.3551	10.5334	10.6114	10.6206	10.4999	-0.120638	0.281294	0.778048
ENSMUSG00000029993	Nfu1	10.4901	10.1241	10.0516	10.3965	10.4336	10.4363	10.2219	10.4221	0.200199	0.157856	0.592933
ENSMUSG00000029992	Gfpt1	10.275	10.5883	10.9342	11.0639	10.6807	10.8552	10.5992	10.8666	0.26743	0.110819	0.487738
ENSMUSG00000029999	Tgfa	10.2166	10.2421	10.2999	9.93018	9.96978	10.0001	10.2529	9.96668	-0.286188	0.00698862	0.0752873
ENSMUSG00000029998	Pcyox1	13.4789	13.3358	13.4201	13.2386	13.2968	13.3689	13.4116	13.3014	-0.110151	0.183514	0.640925
ENSMUSG00000006464	Bbs1	5.5696	4.22943	4.14618	5.53709	5.35202	4.94475	4.6484	5.27795	0.629552	0.367196	0.817413
ENSMUSG00000006462	A530013C23Rik	0	2.26462	3.95221	0	0	0	2.07228	0	-2.07228	0.180645	0.635265
ENSMUSG00000006463	Zdhhc24	6.38122	4.12842	4.39557	6.42634	6.04193	6.18019	4.9684	6.21616	1.24775	0.0953767	0.448171
ENSMUSG00000070167	Snora57	5.03913	4.57481	3.60139	1.97497	2.4734	0	4.40511	1.48279	-2.92232	0.00757736	0.0805844
ENSMUSG00000022309	Angpt1	4.91759	5.13945	5.88055	3.49303	5.73783	5.48231	5.31253	4.90439	-0.408142	0.739596	0.92399
ENSMUSG00000091957	Rps2-ps10	10.1079	10.0483	9.94967	9.87495	9.89929	10.0001	10.0353	9.92477	-0.110513	0.314406	0.81042
ENSMUSG00000104309	Gm5846	4.29253	4.22943	3.72805	3.96864	4.50011	3.45056	4.08334	3.9731	-0.110235	0.945624	0.987359
ENSMUSG00000104303	Gm36976	0	0	1.0798	0	0	0	0.359933	0	-0.359933	0.563571	0.823631
ENSMUSG00000022307	Oxr1	11.8342	11.7957	11.9839	11.7933	11.7854	11.9419	11.8713	11.8402	-0.0310544	0.707265	0.907563
ENSMUSG00000080518	Gm22193	1.21929	0	0	0	0	0	0.406432	0	-0.406432	0.552776	0.820333
ENSMUSG00000073771	Btbd19	6.13079	4.91523	5.36088	5.70863	3.98175	5.1198	5.46897	4.93672	-0.53224	0.392355	0.817413
ENSMUSG00000073775	Kti12	9.5638	9.69793	9.77361	9.56183	9.97468	9.74346	9.67845	9.75999	0.0815424	0.533246	0.820333
ENSMUSG00000076060	Mir704	1.87053	1.82247	1.69041	1.97497	1.71227	1.57846	1.79447	1.75523	-0.0392364	0.982516	0.994524
ENSMUSG00000022303	Dcstamp	0	1.82247	0	1.97497	0	0	0.607489	0.658323	0.0508337	0.958274	0.99074
ENSMUSG00000084603	Gm22204	0	0	3.60139	0	1.09651	0	1.20046	0.365505	-0.834958	0.420946	0.817413
ENSMUSG00000089235	Gm23119	4.08236	3.77445	2.1181	1.97497	1.09651	4.51422	3.32497	2.52857	-0.7964	0.765059	0.934256
ENSMUSG00000034120	Srsf2	10.7447	11.0337	10.8304	11.0747	11.1169	11.1868	10.8696	11.1262	0.256537	0.0250251	0.186365
ENSMUSG00000034121	Mks1	5.03913	3.47864	3.46253	5.23419	4.93535	4.23868	3.99344	4.80274	0.809306	0.312937	0.808629
ENSMUSG00000034126	Pomt2	10.2374	10.5102	10.4704	10.1984	10.4036	10.2791	10.406	10.2937	-0.112313	0.323059	0.817301
ENSMUSG00000034127	Tspan8	4.19127	4.32383	2.44757	4.98994	3.98175	3.45056	3.65422	4.14075	0.486524	0.588088	0.842548
ENSMUSG00000074092	Gm6181	5.95659	5.79552	5.64399	5.66762	5.9912	5.96767	5.7987	5.87549	0.0767941	0.840292	0.961976
ENSMUSG00000074093	Svip	9.09875	8.86184	8.69029	9.35459	9.47441	9.5582	8.88363	9.4624	0.578774	0.000170624	0.00404191
ENSMUSG00000029330	Cds1	4.29253	2.26462	4.5407	4.32573	3.49126	3.16125	3.69928	3.65941	-0.0398716	0.776985	0.938311
ENSMUSG00000029335	Bmp3	0	0	0	0	0	3.89778	0	1.29926	1.29926	0.301152	0.797409
ENSMUSG00000029334	Prkg2	4.08236	4.97463	4.5407	3.66957	5.35202	2.79899	4.53256	3.94019	-0.59237	0.770407	0.935786
ENSMUSG00000029338	Antxr2	10.1183	9.95183	10.0875	10.5968	10.4929	10.54	10.0525	10.5432	0.490721	7.01e-06	0.000269719
ENSMUSG00000083378	Gm13196	1.21929	1.82247	2.71561	1.30194	2.14245	0	1.91912	1.14813	-0.770993	0.677013	0.894545
ENSMUSG00000046434	Hnrnpa1	10.3474	10.2375	10.7403	10.3356	10.3877	10.3245	10.4417	10.3493	-0.0924441	0.403783	0.817413
ENSMUSG00000083373	Gm13392	2.31759	1.82247	1.69041	3.49303	3.16489	3.45056	1.94349	3.36949	1.426	0.194612	0.658404
ENSMUSG00000083375	Gm15057	2.6584	3.10611	2.1181	1.97497	0	2.31412	2.62754	1.4297	-1.19784	0.466423	0.817413
ENSMUSG00000083374	Gm11449	3.53936	3.77445	3.46253	3.66957	3.63038	3.69143	3.59211	3.66379	0.0716772	0.939429	0.985424
ENSMUSG00000088185	Scarna2	6.53379	5.50446	6.10723	4.98994	4.63841	5.19995	6.0485	4.94277	-1.10573	0.0091053	0.0914933
ENSMUSG00000046432	Bex3	4.91759	0	3.46253	4.69572	4.63841	5.41673	2.79337	4.91696	2.12358	0.180502	0.635008
ENSMUSG00000035299	Mid1	5.7226	3.10611	6.30309	6.18615	6.75498	5.27589	5.04393	6.07234	1.02841	0.262441	0.753995
ENSMUSG00000035298	Klhl35	0	2.26462	0	0	0	0	0.754874	0	-0.754874	0.482514	0.817413
ENSMUSG00000035293	G2e3	7.52599	7.24738	7.42125	7.43024	7.21906	6.83581	7.39821	7.1617	-0.236501	0.386048	0.817413
ENSMUSG00000035297	Cops4	10.5616	10.2749	10.4862	10.334	10.6504	10.5591	10.4409	10.5145	0.073582	0.560586	0.823631
ENSMUSG00000035295	Wdr38	2.93388	1.82247	0	0	0	3.69143	1.58545	1.23048	-0.354974	0.884638	0.973703
ENSMUSG00000059939	9430015G10Rik	6.67176	6.98384	6.05985	6.24309	6.18423	5.96767	6.57182	6.13166	-0.440153	0.163749	0.604147
ENSMUSG00000007415	Gatad1	11.1858	11.0162	11.0667	11.381	11.5362	11.2877	11.0896	11.4016	0.312048	0.00297163	0.039518
ENSMUSG00000007411	Mark3	10.6163	10.4342	10.6147	10.2531	10.4883	10.465	10.5551	10.4021	-0.152952	0.170512	0.615858
ENSMUSG00000048347	Pcdhb18	2.31759	2.8762	3.84448	3.82684	0	0	3.01276	1.27561	-1.73714	0.603079	0.851855
ENSMUSG00000078963	Hsbp1l1	4.85274	6.3828	5.73731	5.96706	6.41345	6.14012	5.65762	6.17354	0.515927	0.353462	0.817413
ENSMUSG00000035745	Grin3b	0	0	2.1181	3.96864	2.4734	0	0.706034	2.14735	1.44131	0.297474	0.794988
ENSMUSG00000078546	Zfp995	6.21059	5.46357	6.13035	6.00047	5.22605	5.41673	5.93484	5.54775	-0.387091	0.352527	0.817413
ENSMUSG00000082762	Gm12366	6.2862	5.72807	6.10723	6.15681	6.09094	6.0989	6.0405	6.11555	0.0750515	0.876194	0.972202
ENSMUSG00000087982	Gm22224	0	0	0	1.30194	0	0	0	0.433979	0.433979	0.518877	0.817413
ENSMUSG00000075327	Zbtb2	8.45811	8.66401	8.38855	7.73817	8.11699	8.28947	8.50356	8.04821	-0.455345	0.0201971	0.159365
ENSMUSG00000075324	Fign	5.44316	7.75063	7.04899	8.09593	7.66172	7.79118	6.7476	7.84961	1.10201	0.188158	0.648179
ENSMUSG00000045160	Bola3	9.66406	9.77305	9.56247	10.0326	10.2542	10.3423	9.66652	10.2097	0.543202	2.35e-05	0.000771767
ENSMUSG00000045165	AI467606	4.91759	0	4.31713	4.69572	3.16489	4.23868	3.07824	4.0331	0.954857	0.94345	0.98688
ENSMUSG00000107105	Gm15820	1.87053	0	0	0	0	0	0.623509	0	-0.623509	0.502529	0.817413
ENSMUSG00000078896	Zfp965	4.91759	4.57481	3.30888	4.92181	4.70289	4.84855	4.26709	4.82442	0.55733	0.505894	0.817413
ENSMUSG00000078897	Gm4724	5.20418	4.4959	4.73423	5.39358	5.0389	4.74549	4.81143	5.05932	0.247885	0.637178	0.871002
ENSMUSG00000001151	Pcnt	9.50699	9.73705	9.71364	9.02593	9.0258	9.45989	9.65256	9.17054	-0.482021	0.00162275	0.0246717
ENSMUSG00000001157	Gmcl1	8.51684	8.86184	8.60621	8.56653	9.0258	8.81362	8.66163	8.80198	0.140351	0.4189	0.817413
ENSMUSG00000001156	Mxd1	6.86499	7.90367	7.28365	7.27508	7.21906	7.4579	7.35077	7.31734	-0.0334212	0.712973	0.910139
ENSMUSG00000001155	Ftcd	13.377	13.1409	13.0895	12.6945	12.8547	12.5325	13.2024	12.6939	-0.508524	5.4e-06	0.000212985
ENSMUSG00000078891	Gm11008	2.31759	2.26462	1.69041	2.4321	2.4734	2.31412	2.09087	2.40654	0.315667	0.809211	0.950154
ENSMUSG00000097906	Gm9625	7.33742	7.12162	6.43893	7.21941	7.28373	6.75851	6.96599	7.08722	0.121226	0.740537	0.92399
ENSMUSG00000001158	Snrnp27	8.94781	8.81386	8.88299	9.22632	9.14663	9.27796	8.88155	9.21697	0.335419	0.0176566	0.145191
ENSMUSG00000078898	Zfp968	4.78485	4.41243	4.39557	5.17689	5.60916	5.34803	4.53095	5.37803	0.847077	0.0929234	0.441679
ENSMUSG00000010277	2610507B11Rik	13.0622	12.9949	13.1868	13.05	13.0635	13.0632	13.0813	13.0589	-0.0223962	0.743421	0.924776
ENSMUSG00000051839	Gypa	0	4.41243	4.5407	4.09774	0	0	2.98438	1.36591	-1.61846	0.671966	0.891691
ENSMUSG00000038188	Scarf1	8.84738	8.36978	8.68249	9.10101	8.51735	8.10401	8.63322	8.57412	-0.0590906	0.959326	0.99074
ENSMUSG00000032212	Sltm	10.2531	10.2571	10.4738	10.1656	10.2556	10.2906	10.328	10.2373	-0.0907657	0.384876	0.817413
ENSMUSG00000032216	Nedd4	13.0521	13.0964	13.3889	13.036	13.0688	13.1351	13.1791	13.08	-0.0991622	0.288501	0.784786
ENSMUSG00000032217	Rnf111	9.73998	9.82239	9.68465	9.48719	9.42748	9.66444	9.74901	9.52637	-0.222636	0.0738235	0.385208
ENSMUSG00000032215	Rsl24d1	9.85825	10.1339	10.1239	9.8973	9.8396	9.93715	10.0387	9.89135	-0.147331	0.200586	0.668911
ENSMUSG00000032218	Ccnb2	3.53936	3.77445	4.79337	0	3.16489	4.51422	4.03572	2.5597	-1.47602	0.454437	0.817413
ENSMUSG00000084983	Gm11789	8.53762	8.58521	8.11483	8.86746	8.90424	8.50201	8.41255	8.7579	0.345354	0.0680269	0.365389
ENSMUSG00000084981	Gm15962	4.55959	4.22943	5.10485	5.53709	4.50011	5.54503	4.63129	5.19408	0.562788	0.297757	0.795272
ENSMUSG00000040264	Gbp2b	7.06429	5.33347	7.82003	4.4275	3.87386	3.45056	6.73926	3.91731	-2.82196	1.51e-08	1.12e-06
ENSMUSG00000040265	Dnm3	3.53936	4.32383	3.30888	3.29184	3.87386	2.79899	3.72402	3.32156	-0.40246	0.65006	0.878867
ENSMUSG00000040263	Klhdc4	8.65637	7.95619	8.48139	8.88546	8.66222	8.47004	8.36465	8.67257	0.307925	0.151462	0.581529
ENSMUSG00000040260	Daam2	7.68343	7.66306	7.86207	7.39299	7.32528	7.4415	7.73619	7.38659	-0.349597	0.0918543	0.438461
ENSMUSG00000040268	Plekha1	7.44031	7.34065	7.40237	8.29081	7.03094	8.24293	7.39445	7.8549	0.460449	0.0563908	0.324791
ENSMUSG00000040269	Mrps28	9.57138	9.12698	9.26106	9.17969	9.53765	9.41442	9.31981	9.37725	0.0574431	0.745558	0.925718
ENSMUSG00000010797	Wnt2	5.6094	5.72807	6.34322	6.61072	6.25045	7.04559	5.89356	6.63559	0.742024	0.0440787	0.2769
ENSMUSG00000024251	Thada	8.55301	8.7128	8.8555	9.13526	9.0965	9.21184	8.70711	9.14787	0.440761	0.00403479	0.0498031
ENSMUSG00000024253	Dync2li1	3.36433	0	3.13688	5.44302	3.87386	3.89778	2.16707	4.40489	2.23782	0.0499458	0.299741
ENSMUSG00000024254	Abcg8	11.7465	11.8171	11.0868	11.9559	11.9292	12.0404	11.5502	11.9752	0.425029	0.0125384	0.114496
ENSMUSG00000024259	Slc25a46	11.1618	11.0725	11.177	10.7678	10.8873	11.1507	11.1371	10.9353	-0.201795	0.0811644	0.407695
ENSMUSG00000024258	Polr2d	8.08029	8.3076	8.36437	8.67913	8.48563	8.85754	8.25075	8.6741	0.423344	0.0187066	0.150681
ENSMUSG00000059486	Kbtbd2	8.89243	9.33112	9.22123	9.31198	8.78271	9.26405	9.14826	9.11958	-0.028681	0.863343	0.968371
ENSMUSG00000059481	Plg	17.0753	16.7935	16.9335	16.6555	16.8317	16.689	16.9341	16.7254	-0.208696	0.0393553	0.256314
ENSMUSG00000059482	2610301B20Rik	6.01703	7.21079	7.29392	7.53656	7.26249	7.40815	6.84058	7.4024	0.561819	0.148121	0.57461
ENSMUSG00000056687	Gm11696	3.1651	3.30436	0	3.66957	3.98175	0	2.15649	2.55044	0.393951	0.64505	0.876268
ENSMUSG00000027551	Zfp64	8.05889	8.5947	8.43571	8.52695	8.47643	8.00708	8.3631	8.33682	-0.0262804	0.908107	0.975863
ENSMUSG00000027550	Lrrcc1	4.78485	5.54422	5.1508	4.09774	5.96514	4.63448	5.15996	4.89912	-0.260834	0.921939	0.980348
ENSMUSG00000055489	Ano5	0	0	0	0	2.74241	0	0	0.914137	0.914137	0.454692	0.817413
ENSMUSG00000005107	Slc2a9	10.4275	10.7437	10.7571	10.8876	10.7153	10.6846	10.6428	10.7625	0.119766	0.36493	0.817413
ENSMUSG00000005102	Eif2ak4	8.3912	8.99692	8.76975	8.50384	8.39584	8.49409	8.71929	8.46459	-0.254701	0.127638	0.528395
ENSMUSG00000005103	Wdr1	9.87671	9.621	9.5324	9.743	9.56609	9.56579	9.67671	9.62496	-0.0517469	0.66643	0.888262
ENSMUSG00000055480	Zfp458	6.15788	5.03169	4.90484	5.96706	5.57511	5.41673	5.3648	5.65296	0.288163	0.677411	0.894732
ENSMUSG00000055485	Soga1	7.27693	6.06519	6.59666	6.67421	6.5772	6.46608	6.64626	6.5725	-0.0737624	0.650123	0.878867
ENSMUSG00000081441	Gm6161	4.38715	4.41243	4.9575	4.69572	5.18149	4.84855	4.58569	4.90859	0.322894	0.574039	0.831593
ENSMUSG00000081445	Rpl23a-ps4	0	3.10611	0	0	0	0	1.03537	0	-1.03537	0.452683	0.817413
ENSMUSG00000002944	Cd36	10.1439	8.65042	9.22392	10.5581	11.2134	11.3161	9.33941	11.0292	1.68978	0.00124183	0.0200624
ENSMUSG00000059159	Gm8129	7.33742	7.05438	7.43987	6.921	7.61222	7.17021	7.27722	7.23448	-0.042748	0.94008	0.985655
ENSMUSG00000015354	Pcolce2	7.76499	5.72807	6.34322	6.61072	5.93861	6.61969	6.61209	6.38967	-0.222418	0.299685	0.796929
ENSMUSG00000015355	Cd48	6.9604	5.23972	6.43893	6.40155	5.73783	4.94475	6.21302	5.69471	-0.518309	0.240594	0.72857
ENSMUSG00000059150	Rpl26-ps4	0	0	0	1.30194	0	0	0	0.433979	0.433979	0.518877	0.817413
ENSMUSG00000015357	Clpx	11.5154	11.5034	11.6779	11.4408	11.529	11.7271	11.5656	11.5656	2.74e-05	0.980834	0.993964
ENSMUSG00000040482	Dxo	9.25746	9.2523	9.26628	8.51544	8.9314	8.91803	9.25868	8.78829	-0.470391	0.0027179	0.0367858
ENSMUSG00000040483	Xaf1	6.13079	5.98078	7.4491	6.54431	6.33425	5.8233	6.52022	6.23395	-0.286269	0.309687	0.804666
ENSMUSG00000040481	Bptf	11.2759	11.308	11.1305	11.5667	11.3461	11.3571	11.2381	11.4233	0.185193	0.0887656	0.43058
ENSMUSG00000040488	Ltbp4	10.1741	10.2223	10.2173	10.8583	10.8043	10.5948	10.2046	10.7525	0.547919	8.28e-07	4e-05
ENSMUSG00000040489	Sox30	2.93388	0	2.44757	0	0	0	1.79382	0	-1.79382	0.298993	0.796633
ENSMUSG00000051306	Usp42	8.40257	8.1997	8.29444	8.36964	8.19192	8.13493	8.29891	8.23216	-0.0667438	0.704192	0.905582
ENSMUSG00000095478	Gm9824	5.82756	5.76219	4.9575	5.53709	6.16147	6.59025	5.51575	6.09627	0.580522	0.169528	0.614071
ENSMUSG00000093031	Gm22662	2.6584	0	0	3.49303	0	0	0.886133	1.16434	0.278211	0.7324	0.920382
ENSMUSG00000108878	RP24-343G19.3	3.83626	3.47864	3.72805	5.11723	3.87386	3.89778	3.68098	4.29629	0.615309	0.316349	0.812464
ENSMUSG00000108871	Gm45102	0	2.8762	2.1181	0	0	0	1.66477	0	-1.66477	0.33269	0.817413
ENSMUSG00000108872	Dlg2	3.36433	2.60258	2.71561	2.4321	3.87386	2.31412	2.89417	2.87336	-0.0208122	0.881247	0.972968
ENSMUSG00000108873	Gm44609	0	0	1.69041	0	0	0	0.56347	0	-0.56347	0.511179	0.817413
ENSMUSG00000108874	Gm9711	0	1.82247	0	0	2.14245	0	0.607489	0.714151	0.106663	0.907844	0.975863
ENSMUSG00000084159	Gm12696	6.10318	6.26876	6.01085	6.81231	6.45148	6.14012	6.1276	6.46797	0.340373	0.272483	0.766829
ENSMUSG00000085211	B430219N15Rik	3.96455	3.47864	2.1181	5.96706	6.09094	5.34803	3.1871	5.80201	2.61491	2.43e-05	0.00079241
ENSMUSG00000085213	Gm13091	3.69543	4.72075	3.84448	3.82684	3.63038	3.45056	4.08689	3.63592	-0.45096	0.495005	0.817413
ENSMUSG00000085218	BB218582	0	0	0	0	3.75725	0	0	1.25242	1.25242	0.320143	0.815331
ENSMUSG00000098617	Gm27300	0	0	0	0	1.09651	1.57846	0	0.891658	0.891658	0.477297	0.817413
ENSMUSG00000098614	Gm27301	2.31759	0	0	1.30194	0	0	0.77253	0.433979	-0.338551	0.7427	0.924583
ENSMUSG00000098613	Mir6931	1.21929	1.18169	1.0798	1.30194	0	1.57846	1.16026	0.960132	-0.20013	0.958176	0.99074
ENSMUSG00000047281	Sfn	3.83626	4.0198	5.19534	4.32573	4.08213	4.63448	4.35047	4.34745	-0.00301858	0.834401	0.960492
ENSMUSG00000047284	Neurl4	8.98232	9.34526	9.17194	9.18333	9.28994	9.26405	9.16651	9.24577	0.0792659	0.643221	0.874772
ENSMUSG00000057228	Aadat	12.5197	12.4784	12.3736	12.3779	12.7389	12.4115	12.4572	12.5094	0.0522081	0.61212	0.857314
ENSMUSG00000057229	Atp5sl	10.2657	10.2254	10.0816	10.1112	10.1812	10.2952	10.1909	10.1958	0.00498773	0.996362	0.998701
ENSMUSG00000092966	Gm22240	0	1.82247	0	0	0	0	0.607489	0	-0.607489	0.504143	0.817413
ENSMUSG00000066705	Fxyd6	3.36433	0	0	4.21623	0	3.16125	1.12144	2.45916	1.33772	0.45385	0.817413
ENSMUSG00000084166	Gm6451	3.96455	4.32383	4.31713	4.09774	2.96906	4.94475	4.20184	4.00385	-0.197987	0.961592	0.990983
ENSMUSG00000095463	Entpd4	9.80996	9.6509	9.65506	9.63545	9.66043	9.76339	9.70531	9.68642	-0.0188822	0.838749	0.961623
ENSMUSG00000103260	Gm8146	0	0	0	0	0	2.31412	0	0.771374	0.771374	0.469044	0.817413
ENSMUSG00000103261	Gm36981	0	2.26462	0	0	0	0	0.754874	0	-0.754874	0.482514	0.817413
ENSMUSG00000111964	RP23-70B19.5	7.72025	7.36306	7.39284	7.61415	7.53463	7.24769	7.49205	7.46549	-0.0265615	0.919036	0.979077
ENSMUSG00000111966	RP23-58B7.2	2.31759	1.82247	1.69041	2.4321	2.14245	2.79899	1.94349	2.45785	0.51436	0.684296	0.897506
ENSMUSG00000111960	RP23-7A5.1	0	0	0	0	3.16489	0	0	1.05496	1.05496	0.431598	0.817413
ENSMUSG00000111963	RP24-270K22.2	0	0	1.69041	3.05797	0	0	0.56347	1.01932	0.455852	0.638895	0.871667
ENSMUSG00000052769	Gm9889	0	3.10611	0	0	0	0	1.03537	0	-1.03537	0.452683	0.817413
ENSMUSG00000052760	A630001G21Rik	0	1.82247	3.46253	2.77871	4.26409	0	1.76167	2.3476	0.585932	0.55736	0.822759
ENSMUSG00000052763	Zfp212	8.03717	8.40259	8.28417	8.21456	8.33101	8.26173	8.24131	8.2691	0.0277926	0.926999	0.982119
ENSMUSG00000064412	Gm22246	0	0	1.69041	0	1.09651	0	0.56347	0.365505	-0.197965	0.831671	0.958953
ENSMUSG00000064414	n-R5s215	0	0	0	0	1.09651	0	0	0.365505	0.365505	0.530725	0.820333
ENSMUSG00000021140	Pcnx	11.0818	11.0716	11.0365	11.1851	11.1257	11.0889	11.0633	11.1333	0.0699542	0.476988	0.817413
ENSMUSG00000018040	Rrp7a	9.93856	9.85437	10.269	10.3535	10.3045	10.213	10.0207	10.2903	0.269677	0.0485937	0.295234
ENSMUSG00000050947	Amigo1	6.67176	7.88056	8.24234	7.31546	6.82908	7.53718	7.59822	7.22724	-0.370977	0.137005	0.550679
ENSMUSG00000050945	Zfp438	6.40403	6.14493	5.64399	5.89782	6.20664	6.49814	6.06432	6.20087	0.136549	0.750722	0.92775
ENSMUSG00000102275	Gm37144	5.30457	5.69313	5.32124	6.81231	5.96514	4.84855	5.43965	5.87534	0.435691	0.177998	0.630615
ENSMUSG00000100794	Gm29667	1.21929	0	1.69041	0	0	3.16125	0.969902	1.05375	0.0838478	0.710269	0.908576
ENSMUSG00000106560	Gm43119	3.1651	3.90233	4.05245	4.85032	4.26409	2.79899	3.70663	3.97113	0.264501	0.563185	0.823631
ENSMUSG00000106561	AC151967.1	3.96455	2.8762	4.23419	1.97497	3.87386	3.16125	3.69164	3.00336	-0.688285	0.519213	0.81755
ENSMUSG00000036078	Sigmar1	11.2224	11.2699	11.293	11.701	11.7831	11.6745	11.2618	11.7196	0.457799	6.02e-07	3e-05
ENSMUSG00000106563	Mir6962	0	0	1.0798	0	0	0	0.359933	0	-0.359933	0.563571	0.823631
ENSMUSG00000106565	Gm43582	0	3.63411	2.44757	2.4321	0	0	2.02723	0.810701	-1.21653	0.443111	0.817413
ENSMUSG00000106568	Gm42814	3.53936	4.57481	3.60139	5.49082	2.14245	4.07827	3.90519	3.90385	-0.00133591	0.576755	0.833719
ENSMUSG00000036073	Galt	11.0028	10.6477	10.6562	10.84	10.9037	10.6794	10.7689	10.8077	0.0387987	0.805527	0.948715
ENSMUSG00000002346	Slc25a42	11.5407	11.2817	11.6487	11.5076	10.6666	11.5309	11.4904	11.235	-0.255333	0.45964	0.817413
ENSMUSG00000002345	Borcs8	8.07319	7.72492	7.86896	7.87055	8.19192	7.06712	7.88902	7.70986	-0.179158	0.69103	0.900778
ENSMUSG00000091390	Gm17168	1.87053	3.47864	1.0798	3.05797	3.16489	0	2.14299	2.07428	-0.0687026	0.916487	0.977685
ENSMUSG00000091393	5330438I03Rik	2.6584	3.10611	0	0	3.49126	2.31412	1.9215	1.93513	0.0136255	0.931137	0.983168
ENSMUSG00000061167	Rpl15-ps3	9.79062	9.84047	9.65107	9.86818	9.97141	9.6323	9.76072	9.82396	0.0632456	0.606597	0.854342
ENSMUSG00000093701	Gm21970	6.04632	0	0	0	0	0	2.01544	0	-2.01544	0.43079	0.817413
ENSMUSG00000055817	Mta3	8.86803	8.83805	8.58962	8.60505	8.34623	8.36964	8.76523	8.44031	-0.324925	0.052785	0.310676
ENSMUSG00000096883	Shisa8	0	0	2.1181	3.05797	3.33728	3.89778	0.706034	3.43101	2.72498	0.0868922	0.4258
ENSMUSG00000060419	Rps16-ps2	9.50963	9.41125	9.4031	9.70803	9.7103	9.47205	9.44133	9.63013	0.188802	0.139531	0.556758
ENSMUSG00000108090	Gm6637	1.21929	0	2.1181	0	0	0	1.11247	0	-1.11247	0.473767	0.817413
ENSMUSG00000107215	Gm43197	4.78485	3.30436	4.23419	3.05797	2.74241	3.16125	4.1078	2.98721	-1.12059	0.141019	0.560082
ENSMUSG00000107216	2210412B16Rik	0	2.60258	2.1181	2.4321	0	0	1.57356	0.810701	-0.762859	0.731431	0.920196
ENSMUSG00000096280	Gm23287	0	1.82247	0	0	0	0	0.607489	0	-0.607489	0.504143	0.817413
ENSMUSG00000112093	RP23-168F21.3	0	0	0	0	0	3.69143	0	1.23048	1.23048	0.338248	0.817413
ENSMUSG00000099858	Gm6652	12.1933	12.0034	11.6863	12.1098	12.3249	12.0164	11.961	12.1504	0.189362	0.180291	0.634556
ENSMUSG00000037035	Inhbb	6.63367	6.67912	7.17665	6.42634	6.87177	6.59025	6.82981	6.62945	-0.200357	0.478618	0.817413
ENSMUSG00000037031	Tspan15	7.14774	5.58291	7.08494	6.77418	6.9268	6.64854	6.6052	6.78318	0.177977	0.938774	0.985316
ENSMUSG00000037032	Apbb1	5.25524	5.03169	3.30888	4.52256	5.43028	0	4.53194	3.31761	-1.21432	0.776477	0.938311
ENSMUSG00000020923	Ubtf	10.583	10.3844	10.2227	10.3728	10.3754	10.4196	10.3967	10.3893	-0.00742781	0.877177	0.972202
ENSMUSG00000020922	Lsm12	9.73998	9.46661	9.80808	9.62478	9.77359	9.68199	9.67156	9.69345	0.0218968	0.920325	0.979925
ENSMUSG00000020921	Tmem101	7.36093	7.38512	7.70922	7.5479	7.30465	7.12986	7.48509	7.32747	-0.157619	0.507618	0.817413
ENSMUSG00000014602	Kif1a	4.55959	2.26462	1.69041	3.82684	3.16489	0	2.83821	2.33058	-0.507631	0.762048	0.933042
ENSMUSG00000020926	Adam11	8.33889	7.75063	7.82003	9.40848	9.23377	9.70277	7.96985	9.44834	1.47849	1.4e-14	2.55e-12
ENSMUSG00000020925	Ccdc43	8.43061	8.68195	8.38374	8.51544	8.28963	8.29861	8.49877	8.36789	-0.130876	0.438791	0.817413
ENSMUSG00000014606	Slc25a11	11.4776	11.5166	11.3303	11.6126	11.5728	11.5084	11.4415	11.5646	0.123134	0.231712	0.71658
ENSMUSG00000014609	Chrne	0	0	2.71561	0	0	0	0.905204	0	-0.905204	0.467025	0.817413
ENSMUSG00000020929	Eftud2	10.0146	9.95552	10.0948	10.0427	9.96814	10.1208	10.0217	10.0439	0.0222194	0.885686	0.974029
ENSMUSG00000101111	Gm28437	16.0885	16.2532	15.8348	16.0201	16.0138	16.0412	16.0588	16.025	-0.0337931	0.671827	0.891558
ENSMUSG00000030022	Adamts9	5.86092	6.42601	6.84048	5.53709	5.64242	6.01275	6.3758	5.73075	-0.645048	0.0646948	0.353979
ENSMUSG00000030020	Prickle2	6.51296	6.2205	6.49345	6.47469	6.18423	6.01275	6.40897	6.22389	-0.185075	0.586145	0.841302
ENSMUSG00000104548	Gm43857	6.55433	3.30436	5.32124	4.52256	6.82908	2.31412	5.05998	4.55525	-0.504726	0.99065	0.99628
ENSMUSG00000030029	Lrig1	9.13669	9.68908	10.0241	10.1839	10.1071	9.96609	9.61662	10.0857	0.469097	0.0179724	0.147047
ENSMUSG00000104547	Gm43022	0	1.82247	0	2.4321	2.74241	0	0.607489	1.72484	1.11735	0.494736	0.817413
ENSMUSG00000091736	Yy2	4.97964	1.82247	5.54422	4.32573	1.09651	1.57846	4.11544	2.33357	-1.78187	0.110666	0.487444
ENSMUSG00000063146	Clip2	6.69044	6.09226	6.4014	6.69477	6.06664	5.87304	6.3947	6.21148	-0.183216	0.657754	0.883862
ENSMUSG00000109327	Gm44995	0	0	0	1.97497	0	0	0	0.658323	0.658323	0.478676	0.817413
ENSMUSG00000063142	Kcnma1	2.93388	4.32383	2.1181	2.4321	3.16489	4.23868	3.12527	3.27856	0.153283	0.979803	0.993746
ENSMUSG00000109324	Prmt1	8.90448	8.78511	8.88978	8.68941	8.32078	8.56391	8.85979	8.5247	-0.335088	0.0395053	0.256925
ENSMUSG00000048076	Arf1	13.5078	13.5771	13.6286	13.6067	13.6861	13.6338	13.5711	13.6422	0.0710279	0.424075	0.817413
ENSMUSG00000039501	Znfx1	10.7414	10.8878	11.0585	11.049	11.1734	11.0691	10.8959	11.0972	0.201295	0.0799521	0.40394
ENSMUSG00000048078	Tenm4	3.96455	2.60258	2.94157	2.4321	2.96906	0	3.16956	1.80039	-1.36918	0.394417	0.817413
ENSMUSG00000039509	Nup133	8.73493	8.70844	9.14381	8.69962	8.75257	8.76175	8.86239	8.73798	-0.124414	0.387506	0.817413
ENSMUSG00000037349	Nudt22	7.63605	7.45978	7.31426	7.35475	7.69381	7.30318	7.47003	7.45058	-0.019453	0.966438	0.991642
ENSMUSG00000104896	Rnu3b4	6.2862	6.26876	5.28048	3.29184	3.98175	2.31412	5.94515	3.1959	-2.74925	5.82e-06	0.000228302
ENSMUSG00000104897	Gm43203	1.21929	2.26462	0	1.97497	0	0	1.16131	0.658323	-0.502983	0.810613	0.950567
ENSMUSG00000104895	Gm8454	2.6584	1.82247	0	0	0	0	1.49362	0	-1.49362	0.389395	0.817413
ENSMUSG00000104891	2510017J16Rik	0	0	1.69041	1.30194	0	2.79899	0.56347	1.36698	0.803505	0.611759	0.85707
ENSMUSG00000111104	RP23-88K14.4	2.31759	2.8762	3.13688	2.4321	2.4734	2.79899	2.77689	2.56816	-0.208727	0.81586	0.951268
ENSMUSG00000021322	Aoah	7.07854	4.0198	4.39557	2.4321	4.98805	4.51422	5.16464	3.97813	-1.18651	0.0516653	0.306851
ENSMUSG00000021326	Trim27	10.0035	9.92948	10.134	9.76746	10.0338	9.87747	10.0223	9.89292	-0.129389	0.290357	0.786254
ENSMUSG00000021327	Zkscan3	10.5321	10.269	10.3599	10.7084	10.5378	10.6776	10.387	10.6413	0.254276	0.0294608	0.209153
ENSMUSG00000102496	Gm36989	3.96455	1.82247	0	0	0	0	1.929	0	-1.929	0.201794	0.670048
ENSMUSG00000022781	Pak2	10.792	11.0064	10.9301	10.7459	10.7756	10.8904	10.9095	10.8039	-0.105571	0.288785	0.784786
ENSMUSG00000031089	Slc6a14	0	1.82247	0	0	0	3.45056	0.607489	1.15019	0.542697	0.57042	0.828713
ENSMUSG00000022787	Wdr53	7.68343	7.22309	7.52084	7.17621	7.43375	7.32121	7.47579	7.31039	-0.165401	0.45753	0.817413
ENSMUSG00000022789	Dnm1l	11.0269	11.0073	11.1997	10.8272	10.8469	11.057	11.078	10.9104	-0.167595	0.111192	0.489194
ENSMUSG00000022788	Fgd4	9.21939	9.46143	9.33507	9.37703	9.46049	9.29631	9.33863	9.37794	0.0393118	0.794034	0.945151
ENSMUSG00000024049	Myom1	6.23623	5.95151	6.61317	4.85032	4.93535	4.84855	6.26697	4.87807	-1.3889	0.000560138	0.0106352
ENSMUSG00000106675	Gm43798	0	0	1.69041	0	0	0	0.56347	0	-0.56347	0.511179	0.817413
ENSMUSG00000070953	Rabepk	8.327	8.40259	8.50811	8.65311	8.60009	8.53329	8.41257	8.5955	0.182929	0.26887	0.762383
ENSMUSG00000028809	Srrm1	11.2368	11.1821	11.1749	10.9043	10.9139	11.038	11.1979	10.9521	-0.245833	0.00930275	0.0929868
ENSMUSG00000028800	Hdac1	9.44235	9.62564	9.61464	9.72062	9.57903	9.87136	9.56088	9.72367	0.162793	0.235053	0.720766
ENSMUSG00000028803	Nipal3	8.25982	8.48662	8.82039	9.13149	8.93476	8.72158	8.52227	8.92928	0.407002	0.0316849	0.220041
ENSMUSG00000028804	Csmd2	0	0	1.69041	0	0	0	0.56347	0	-0.56347	0.511179	0.817413
ENSMUSG00000028807	Zbtb8a	5.95659	5.82809	5.28048	6.32449	5.64242	3.89778	5.68839	5.28823	-0.400161	0.839064	0.961781
ENSMUSG00000022439	Parvg	5.20418	4.4959	4.46996	3.96864	3.16489	0	4.72335	2.37784	-2.3455	0.0493023	0.29743
ENSMUSG00000022438	Parvb	7.38406	7.50077	7.55542	7.07006	6.69284	6.46608	7.48009	6.74299	-0.737092	0.00544946	0.0626003
ENSMUSG00000022433	Csnk1e	7.56699	7.55043	7.686	7.67749	7.31501	7.52167	7.60114	7.50472	-0.096416	0.655925	0.882565
ENSMUSG00000011958	Bnip2	10.1337	9.72413	10.3745	9.79152	10.1366	10.014	10.0774	9.98072	-0.0967147	0.459554	0.817413
ENSMUSG00000022437	Samm50	12.0628	12.1206	12.1895	12.1531	12.1069	12.273	12.1243	12.1777	0.0533845	0.592311	0.845049
ENSMUSG00000022436	Sh3bp1	6.47037	5.85995	6.01085	5.53709	5.1355	5.71834	6.11372	5.46365	-0.650078	0.0916792	0.437971
ENSMUSG00000022434	Fam118a	4.38715	4.97463	6.28259	3.66957	4.42564	3.16125	5.21479	3.75215	-1.46264	0.0178649	0.146534
ENSMUSG00000036854	Hspb6	9.18029	8.86969	8.84156	8.29081	8.76395	8.66622	8.96384	8.57366	-0.390187	0.0281931	0.202671
ENSMUSG00000042737	Dpm3	9.2226	9.01117	9.068	9.1978	9.14952	9.28257	9.10059	9.20997	0.109374	0.461001	0.817413
ENSMUSG00000036856	Wnt4	8.89243	8.46088	8.60208	7.90624	8.15782	7.79118	8.6518	7.95175	-0.700049	0.000242581	0.00542073
ENSMUSG00000036850	Mrpl41	9.14348	9.21275	9.09175	9.20499	9.5876	9.6609	9.14933	9.4845	0.335165	0.0230215	0.175808
ENSMUSG00000025789	St8sia2	0	3.30436	0	0	3.63038	2.79899	1.10145	2.14312	1.04167	0.641645	0.873615
ENSMUSG00000025784	Clec3b	4.55959	0	0	4.85032	3.16489	0	1.51986	2.67173	1.15187	0.838684	0.961623
ENSMUSG00000025785	Exosc7	9.10224	9.08042	8.9943	9.24038	9.28205	9.35	9.05898	9.29081	0.231825	0.0913525	0.43707
ENSMUSG00000025786	Zdhhc3	10.3678	10.3257	10.2846	10.1545	10.2809	10.079	10.326	10.1715	-0.154551	0.166213	0.608595
ENSMUSG00000025787	Tgm4	1.87053	4.0198	0	0	2.14245	0	1.96344	0.714151	-1.24929	0.352927	0.817413
ENSMUSG00000025780	Itih5	10.1757	10.3679	10.4091	9.05802	8.37125	8.77489	10.3176	8.73472	-1.58287	9.15e-22	3.27e-19
ENSMUSG00000025781	Atp5c1	12.808	12.854	12.6171	12.8205	12.9134	12.8178	12.7597	12.8506	0.0908448	0.388064	0.817413
ENSMUSG00000012609	Ttll5	9.2976	9.14971	9.4102	9.23688	9.06619	9.40176	9.28584	9.23494	-0.0508986	0.693724	0.901365
ENSMUSG00000023066	Rttn	4.7136	6.19575	5.57825	4.61174	4.57092	4.94475	5.49587	4.70913	-0.786732	0.081714	0.409617
ENSMUSG00000049858	Suox	12.3904	12.3437	12.082	12.563	12.6405	12.8619	12.272	12.6885	0.416428	0.000353133	0.00728576
ENSMUSG00000035506	Slc12a8	4.7136	2.26462	4.73423	0	0	0	3.90415	0	-3.90415	0.00477523	0.0567074
ENSMUSG00000035505	Cox18	8.07319	8.10318	8.09733	8.31093	8.69429	8.39541	8.09124	8.46687	0.375638	0.0329802	0.226065
ENSMUSG00000035504	Reep6	14.7137	14.5213	13.5066	14.6329	14.1499	14.7994	14.2472	14.5274	0.280142	0.600083	0.849615
ENSMUSG00000020493	Prr11	2.93388	2.26462	5.23854	3.82684	2.96906	4.07827	3.47901	3.62472	0.14571	0.669725	0.890215
ENSMUSG00000020492	Ska2	5.95659	4.97463	4.79337	3.96864	4.8238	4.94475	5.24153	4.57906	-0.662468	0.210413	0.683699
ENSMUSG00000020491	2810021J22Rik	5.48655	6.09226	5.1508	6.52148	5.9912	6.25715	5.57654	6.25661	0.680068	0.106271	0.477692
ENSMUSG00000020496	Rnf187	11.5329	11.3173	11.1603	11.4123	11.7173	11.2459	11.3368	11.4585	0.121671	0.355429	0.817413
ENSMUSG00000020495	Smg8	9.73324	9.65544	9.4861	9.17238	9.3004	9.65024	9.62493	9.37434	-0.250587	0.0991434	0.45814
ENSMUSG00000012123	Aim1l	7.23937	7.74211	5.79632	7.74804	7.44322	8.15518	6.92593	7.78214	0.856209	0.0643908	0.352822
ENSMUSG00000033904	Ccp110	7.84218	7.99257	8.53001	7.44245	7.32528	8.36964	8.12159	7.71246	-0.409128	0.170632	0.615858
ENSMUSG00000033906	Zdhhc15	3.36433	0	0	0	2.96906	0	1.12144	0.989686	-0.131759	0.883341	0.973399
ENSMUSG00000033900	Map9	4.7136	4.41243	4.79337	5.2893	3.49126	4.94475	4.6398	4.5751	-0.0646963	0.886208	0.974352
ENSMUSG00000028378	Ptgr1	7.4513	8.12301	7.82003	7.36761	7.54346	7.68377	7.79811	7.53161	-0.266502	0.207925	0.680287
ENSMUSG00000033902	Mapkbp1	8.14941	8.09651	7.59751	8.07256	8.09914	8.21427	7.94781	8.12865	0.180842	0.446678	0.817413
ENSMUSG00000033909	Usp36	9.76001	9.71108	9.79004	9.84768	9.401	9.4801	9.75371	9.57626	-0.177453	0.239413	0.727299
ENSMUSG00000028373	Astn2	5.03913	5.37815	6.42029	6.35064	5.18149	5.03493	5.61252	5.52235	-0.0901755	0.859935	0.967547
ENSMUSG00000028370	Pappa	4.29253	2.8762	4.31713	5.11723	4.98805	0	3.82862	3.36843	-0.460194	0.542748	0.820333
ENSMUSG00000062704	9430002A10Rik	1.21929	3.10611	3.30888	3.29184	2.74241	4.07827	2.54476	3.37084	0.826081	0.528409	0.820333
ENSMUSG00000025262	Fam120c	7.42923	7.74211	7.58919	7.72823	8.10511	7.58274	7.58685	7.80536	0.218517	0.296737	0.794309
ENSMUSG00000020149	Rab1a	12.7641	12.9835	12.8967	12.8739	12.8592	12.9826	12.8814	12.9052	0.023835	0.855365	0.966115
ENSMUSG00000020140	Lgr5	5.79341	5.33347	5.76712	5.53709	7.16286	6.70457	5.63133	6.46818	0.836845	0.0204826	0.161071
ENSMUSG00000020143	Dock2	8.69849	6.92482	8.09733	6.81231	5.73783	5.03493	7.90688	5.86169	-2.04519	0.00414503	0.0509164
ENSMUSG00000020142	Slc1a4	6.67176	5.03169	6.01085	6.03312	6.75498	6.01275	5.90477	6.26695	0.362185	0.532287	0.820333
ENSMUSG00000018565	Elp5	9.2823	9.52242	9.03162	9.52499	9.7528	9.57333	9.27878	9.61704	0.338261	0.0346946	0.234986
ENSMUSG00000018566	Slc2a4	5.6094	4.41243	7.01213	3.49303	5.1355	4.63448	5.67798	4.42101	-1.25698	0.0186848	0.150627
ENSMUSG00000018567	Gabarap	11.3939	11.3394	10.8687	11.058	11.3786	11.2136	11.2006	11.2167	0.0160861	0.996545	0.998701
ENSMUSG00000094335	Igkv1-117	2.93388	4.22943	5.39946	2.4321	0	3.89778	4.18759	2.10996	-2.07763	0.0970685	0.452485
ENSMUSG00000018569	Cldn7	2.93388	0	3.30888	4.52256	2.96906	3.45056	2.08092	3.64739	1.56647	0.281285	0.778048
ENSMUSG00000094334	Fabp5l2	0	0	2.94157	0	0	0	0.980522	0	-0.980522	0.461103	0.817413
ENSMUSG00000086834	Gm14547	0	1.18169	0	0	0	0	0.393897	0	-0.393897	0.55464	0.820333
ENSMUSG00000052403	Fcnaos	0	0	0	1.97497	0	0	0	0.658323	0.658323	0.478676	0.817413
ENSMUSG00000039087	Rreb1	11.2256	11.116	11.0585	11.042	10.7671	11.2052	11.1334	11.0048	-0.128588	0.305521	0.802505
ENSMUSG00000052407	Ccdc171	5.98713	6.84748	6.10723	5.23419	5.26927	5.66285	6.31395	5.38877	-0.925173	0.014513	0.12634
ENSMUSG00000052406	Rexo4	9.01972	9.09052	9.2266	9.13901	9.18381	9.16767	9.11228	9.1635	0.0512148	0.747171	0.926017
ENSMUSG00000044367	Slc16a13	6.70887	6.8315	5.47366	6.97241	6.72425	7.4415	6.33801	7.04605	0.708047	0.0893529	0.432298
ENSMUSG00000044365	Cxxc4	2.6584	3.10611	0	5.23419	2.96906	4.07827	1.9215	4.09384	2.17234	0.06117	0.342674
ENSMUSG00000039089	L3mbtl3	7.4513	7.75063	7.67031	8.18581	7.99355	7.86679	7.62408	8.01538	0.391301	0.0581322	0.331067
ENSMUSG00000086839	Gm11973	0	1.82247	0	2.4321	0	0	0.607489	0.810701	0.203212	0.840614	0.961976
ENSMUSG00000044362	Ccdc89	0	0	0	0	3.75725	3.69143	0	2.48289	2.48289	0.102721	0.467956
ENSMUSG00000044361	BC024139	6.79768	6.89438	6.67738	6.98915	7.16286	6.21918	6.78981	6.7904	0.000590447	0.831695	0.958953
ENSMUSG00000086040	Wipf3	8.22821	7.896	7.87582	8.48035	8.35629	8.68026	8.00001	8.50563	0.505621	0.00831692	0.0858351
ENSMUSG00000106574	Gm2451	3.53936	3.47864	3.46253	3.29184	3.75725	3.89778	3.49351	3.64896	0.155444	0.836353	0.961368
ENSMUSG00000058447	Gm26920	0	0	3.60139	0	0	0	1.20046	0	-1.20046	0.364019	0.817413
ENSMUSG00000058446	Znrf2	11.139	11.1907	11.0993	10.9563	10.9974	10.9811	11.143	10.9783	-0.164755	0.0740999	0.386274
ENSMUSG00000058444	Map2k5	9.60622	9.78969	9.69049	9.38337	9.47441	9.57333	9.69547	9.47704	-0.218429	0.0782035	0.399047
ENSMUSG00000058443	Rpl10-ps3	10.2531	10.2375	10.0771	10.3058	10.3617	10.2929	10.1893	10.3202	0.130897	0.255372	0.746999
ENSMUSG00000058440	Nrf1	7.88334	8.06269	7.98766	8.28404	8.05659	8.43735	7.9779	8.25933	0.28143	0.143329	0.564912
ENSMUSG00000073980	Gm9574	0	0	3.13688	0	1.71227	0	1.04563	0.570755	-0.474871	0.631462	0.868022
ENSMUSG00000073982	Rhog	8.65161	8.66852	8.56437	7.90624	8.33101	8.30768	8.62817	8.18165	-0.446521	0.0138827	0.123055
ENSMUSG00000024493	Lars	9.83955	10.0552	10.2625	9.99585	10.1952	10.3065	10.0524	10.1659	0.113451	0.452815	0.817413
ENSMUSG00000073987	Ggh	8.64205	8.71716	8.69029	7.698	7.93435	8.28947	8.68317	7.97394	-0.709223	0.000174386	0.00410975
ENSMUSG00000073988	Ttpa	14.4735	14.5927	14.3235	14.4916	14.5403	14.7845	14.4633	14.6055	0.142219	0.214503	0.689275
ENSMUSG00000106570	C230071H17Rik	0	0	0	0	2.14245	0	0	0.714151	0.714151	0.470548	0.817413
ENSMUSG00000024498	Tcerg1	9.16701	9.36204	9.48834	8.84465	8.50384	9.22147	9.33913	8.85665	-0.482479	0.00906028	0.0912596
ENSMUSG00000049950	Rpp38	6.44859	7.23529	7.06108	6.97241	7.01833	7.06712	6.91499	7.01929	0.104301	0.83288	0.959604
ENSMUSG00000033016	Nfatc1	9.34552	9.44315	9.33009	9.31531	9.11439	9.35438	9.37292	9.26136	-0.111557	0.394332	0.817413
ENSMUSG00000033014	Trim33	10.4107	10.272	10.3961	10.0997	10.1468	10.286	10.3596	10.1775	-0.182077	0.0907385	0.435739
ENSMUSG00000059316	Slc27a4	10.8831	10.6154	10.6239	10.5067	10.9821	10.8239	10.7075	10.7709	0.0634258	0.611305	0.856864
ENSMUSG00000005698	Ctcf	10.3161	10.5127	10.4985	10.329	10.1655	10.5892	10.4424	10.3613	-0.0811796	0.528618	0.820333
ENSMUSG00000005699	Pard6a	5.52867	6.31547	5.54422	5.96706	7.01833	6.25715	5.79612	6.41418	0.618058	0.106396	0.477927
ENSMUSG00000005696	Sh2d1a	3.36433	0	3.72805	0	0	0	2.36413	0	-2.36413	0.138911	0.555158
ENSMUSG00000055866	Per2	10.2053	10.3399	10.216	11.2377	11.2002	10.7593	10.2537	11.0657	0.812011	7.01e-10	6.73e-08
ENSMUSG00000098458	Mir6971	1.21929	1.18169	0	1.30194	1.09651	1.57846	0.800329	1.32564	0.525308	0.784041	0.940654
ENSMUSG00000004568	Arhgef18	10.7051	10.6061	10.4693	10.3421	10.4096	10.3922	10.5935	10.3813	-0.212176	0.0463885	0.287149
ENSMUSG00000004565	Pnpla6	9.50172	9.19413	9.07695	9.46642	8.7334	8.41233	9.2576	8.87072	-0.386883	0.140017	0.557921
ENSMUSG00000004567	Mcoln1	10.5867	10.5189	10.7252	10.5539	10.4288	10.4731	10.6103	10.4852	-0.125042	0.22247	0.701921
ENSMUSG00000004561	Mettl17	8.10834	8.14257	7.41184	8.75451	8.26848	8.09356	7.88758	8.37218	0.484598	0.0479234	0.293157
ENSMUSG00000004562	Arhgef40	8.327	7.88056	8.29955	8.36323	8.25241	8.60865	8.16904	8.4081	0.239059	0.244257	0.732612
ENSMUSG00000047045	Tmem164	7.50504	7.82515	7.2733	7.86149	7.54346	7.72499	7.53449	7.70998	0.175483	0.495002	0.817413
ENSMUSG00000047044	D030056L22Rik	7.85878	8.21826	7.99398	7.84319	7.65359	7.4415	8.02367	7.64609	-0.377579	0.0751553	0.388875
ENSMUSG00000047040	Prr15l	5.09627	4.57481	0	3.49303	4.08213	0	3.22369	2.52505	-0.698641	0.397765	0.817413
ENSMUSG00000077220	Snord78	1.21929	0	1.0798	2.77871	1.09651	1.57846	0.766365	1.8179	1.05153	0.472635	0.817413
ENSMUSG00000077222	Gm22270	1.87053	3.10611	3.84448	3.66957	3.16489	0	2.94037	2.27815	-0.662218	0.853866	0.965402
ENSMUSG00000081070	Gm13181	4.08236	3.10611	3.60139	4.09774	4.26409	4.94475	3.59662	4.43553	0.838907	0.253331	0.744157
ENSMUSG00000081071	Gm9836	4.47595	3.90233	3.72805	4.09774	4.34713	4.51422	4.03544	4.3197	0.284255	0.707252	0.907563
ENSMUSG00000072618	Gm10384	0	0	0	0	2.14245	0	0	0.714151	0.714151	0.470548	0.817413
ENSMUSG00000081076	Rpsa-ps4	1.21929	2.60258	0	1.30194	0	0	1.27396	0.433979	-0.839978	0.578063	0.834988
ENSMUSG00000081077	Gm13899	0	3.90233	3.72805	4.09774	2.74241	3.69143	2.54346	3.51053	0.967067	0.766007	0.934568
ENSMUSG00000085760	Gm14302	0	2.26462	0	2.4321	0	0	0.754874	0.810701	0.0558271	0.953945	0.989872
ENSMUSG00000085766	2810430I11Rik	0	3.10611	0	0	0	0	1.03537	0	-1.03537	0.452683	0.817413
ENSMUSG00000085767	Gm13563	0	3.77445	0	4.09774	2.96906	3.69143	1.25815	3.58608	2.32793	0.333934	0.817413
ENSMUSG00000021587	Pcsk1	0	0	0	2.4321	0	0	0	0.810701	0.810701	0.462958	0.817413
ENSMUSG00000107225	Gm43637	6.42648	6.99823	5.79632	7.67749	5.93861	6.59025	6.40701	6.73545	0.328441	0.31874	0.814742
ENSMUSG00000067786	Nnat	0	2.26462	0	3.29184	3.75725	3.89778	0.754874	3.64896	2.89408	0.0621942	0.346124
ENSMUSG00000029810	Tmem176b	11.3335	11.1052	11.197	11.8951	11.8263	11.4264	11.2119	11.7159	0.503998	5.72e-05	0.00163959
ENSMUSG00000006589	Aprt	9.10919	9.01472	8.83101	8.64785	9.04769	8.34341	8.98497	8.67965	-0.305326	0.140152	0.558262
ENSMUSG00000029815	Malsu1	8.70769	8.48151	8.59378	9.06988	8.88352	8.90613	8.59433	8.95318	0.358851	0.0212187	0.165042
ENSMUSG00000029816	Gpnmb	0	0	4.60813	2.77871	3.63038	0	1.53604	2.13636	0.600318	0.814547	0.951037
ENSMUSG00000029817	Tra2a	8.66583	9.0323	9.09175	8.51544	8.99071	8.73509	8.92996	8.74708	-0.18288	0.301832	0.798092
ENSMUSG00000006585	Cdt1	6.8148	6.17056	6.88195	5.44302	5.46787	5.27589	6.62244	5.39559	-1.22684	0.000557904	0.0106016
ENSMUSG00000089686	Mnd1-ps	0	1.18169	0	2.4321	1.71227	3.45056	0.393897	2.53164	2.13774	0.184678	0.642929
ENSMUSG00000006586	Runx1t1	3.1651	0	2.71561	3.05797	5.08801	4.63448	1.96024	4.26015	2.29992	0.0419962	0.267941
ENSMUSG00000089683	4930570N18Rik	0	1.82247	1.69041	3.05797	0	4.38302	1.17096	2.48033	1.30937	0.207252	0.679447
ENSMUSG00000089682	Bcl2l2	9.71511	9.83647	10.0179	9.96444	9.83242	9.77324	9.85649	9.8567	0.000208953	0.960391	0.990818
ENSMUSG00000089680	Gm15722	0	0	0	0	2.4734	0	0	0.824466	0.824466	0.46085	0.817413
ENSMUSG00000095661	Gm8935	0	0	1.0798	1.30194	1.09651	0	0.359933	0.799484	0.439551	0.773348	0.937317
ENSMUSG00000041439	Mfsd6	9.83745	9.92948	10.1468	9.81987	9.70637	9.71305	9.97124	9.74643	-0.22481	0.0641688	0.352112
ENSMUSG00000003032	Klf4	6.84845	5.37815	6.34322	6.95548	6.84345	6.25715	6.18994	6.68536	0.495417	0.274752	0.769743
ENSMUSG00000003033	Ap1m1	9.83745	10.0689	9.757	9.97499	10.2189	10.1539	9.88778	10.1159	0.228129	0.0901087	0.434023
ENSMUSG00000003031	Cdkn1b	9.229	8.48662	9.00997	8.83542	9.05079	9.15264	8.90853	9.01295	0.104421	0.692275	0.901241
ENSMUSG00000003038	Hmgn2	8.05168	8.19347	8.07962	8.99311	9.17815	9.85907	8.10826	9.34345	1.23519	7.38e-10	7.03e-08
ENSMUSG00000003039	Fam32a	10.3474	10.1241	10.0054	10.115	10.3238	10.3986	10.159	10.2791	0.120187	0.380064	0.817413
ENSMUSG00000047959	Kcna3	3.1651	1.82247	1.69041	0	2.4734	0	2.22599	0.824466	-1.40153	0.52585	0.820333
ENSMUSG00000084411	Gm11510	3.69543	4.22943	3.72805	4.4275	3.98175	3.16125	3.8843	3.85683	-0.0274725	0.944751	0.987359
ENSMUSG00000084415	Gm12837	1.87053	2.26462	0	0	0	0	1.37838	0	-1.37838	0.43694	0.817413
ENSMUSG00000047953	Gp5	0	4.12842	3.60139	0	0	0	2.5766	0	-2.5766	0.0909344	0.435982
ENSMUSG00000084416	Rpl10a-ps1	9.68516	9.59047	9.58983	9.41469	9.73171	9.18747	9.62182	9.44462	-0.177198	0.294141	0.791346
ENSMUSG00000034379	Wdr5b	4.78485	6.09226	5.39946	5.62541	5.64242	5.96767	5.42552	5.74517	0.319641	0.629743	0.86759
ENSMUSG00000105613	Gm43684	1.87053	0	0	0	0	0	0.623509	0	-0.623509	0.502529	0.817413
ENSMUSG00000034371	Tkfc	13.6454	14.082	14.1308	13.936	14.0407	14.0224	13.9527	13.9997	0.0469299	0.822542	0.95455
ENSMUSG00000034377	Tulp4	11.2055	11.3209	11.4297	11.2672	11.1627	11.3788	11.3187	11.2696	-0.0491202	0.600893	0.850274
ENSMUSG00000074754	Gm561	7.76499	7.7759	7.77672	7.8153	8.33611	8.25236	7.77254	8.13459	0.362051	0.0659262	0.35772
ENSMUSG00000074758	Gm5535	1.87053	1.18169	0	0	0	0	1.01741	0	-1.01741	0.481614	0.817413
ENSMUSG00000080303	Gm12419	0	1.82247	0	0	1.71227	1.57846	0.607489	1.09691	0.48942	0.837222	0.961368
ENSMUSG00000108226	Gm44063	0	0	0	0	1.71227	2.31412	0	1.34213	1.34213	0.435356	0.817413
ENSMUSG00000087823	Gm22281	1.21929	0	0	1.30194	0	0	0.406432	0.433979	0.0275474	0.966573	0.991642
ENSMUSG00000017002	Slpi	4.91759	3.90233	4.31713	3.66957	4.26409	2.31412	4.37902	3.41593	-0.963092	0.306025	0.802822
ENSMUSG00000017009	Sdc4	13.4485	13.1936	13.1489	13.3274	13.4313	13.5638	13.2636	13.4408	0.1772	0.111857	0.490607
ENSMUSG00000046603	Tcaim	9.37757	9.08716	9.5237	9.44534	9.60035	9.59573	9.32948	9.54714	0.217663	0.156262	0.590534
ENSMUSG00000079262	Slco1a6	0	0	2.1181	0	0	3.45056	0.706034	1.15019	0.444151	0.631217	0.868022
ENSMUSG00000046607	Hrk	3.69543	3.90233	0	3.66957	0	3.89778	2.53259	2.52245	-0.0101396	0.976711	0.993363
ENSMUSG00000079260	Tmppe	7.88334	8.24263	8.05567	9.06988	8.4007	7.9959	8.06055	8.48883	0.428281	0.0437845	0.276038
ENSMUSG00000046605	B3gntl1	5.52867	6.11884	5.82495	6.06505	5.46787	5.8233	5.82415	5.78541	-0.0387446	0.901448	0.975863
ENSMUSG00000015533	Itga2	4.29253	4.12842	0	0	4.08213	4.23868	2.80698	2.7736	-0.0333822	0.961526	0.990983
ENSMUSG00000015536	Mocs2	10.8038	11.151	10.9351	11.2157	11.0733	11.2588	10.9633	11.1826	0.219295	0.075711	0.390601
ENSMUSG00000082812	Gm14860	2.31759	0	3.30888	1.97497	1.71227	0	1.87549	1.22908	-0.646411	0.558795	0.823496
ENSMUSG00000082816	Gm11953	1.87053	0	1.0798	1.97497	0	0	0.983442	0.658323	-0.325119	0.92281	0.981001
ENSMUSG00000099413	Gm17767	3.83626	0	3.72805	4.61174	3.98175	0	2.52143	2.8645	0.343061	0.643601	0.875061
ENSMUSG00000002633	Shh	0	0	0	3.96864	2.96906	0	0	2.31257	2.31257	0.12383	0.520519
ENSMUSG00000002635	Pdcd2l	8.06606	7.99257	8.04961	7.87055	7.72519	7.75183	8.03608	7.78252	-0.253557	0.17789	0.630488
ENSMUSG00000000673	Haao	13.0048	12.7131	12.5008	12.8846	12.9716	12.8604	12.7396	12.9055	0.16594	0.221729	0.700873
ENSMUSG00000044600	Smim7	9.99035	9.97383	9.78459	10.3712	10.3828	10.2559	9.91626	10.3366	0.420356	0.000363515	0.00746627
ENSMUSG00000044609	Gm9294	4.55959	4.12842	4.67256	5.17689	4.70289	4.94475	4.45352	4.94151	0.487989	0.396324	0.817413
ENSMUSG00000041078	Grid1	5.64813	5.19045	4.73423	0	5.43028	5.41673	5.19094	3.61567	-1.57527	0.610252	0.856519
ENSMUSG00000041079	Rwdd2b	8.69849	8.36423	7.88943	8.58866	8.75637	8.9357	8.31739	8.76024	0.442858	0.0490237	0.296569
ENSMUSG00000112109	RP23-388A21.2	0	0	0	0	2.96906	0	0	0.989686	0.989686	0.450429	0.817413
ENSMUSG00000008129	4930432K21Rik	0	0	0	2.4321	2.14245	0	0	1.52485	1.52485	0.373693	0.817413
ENSMUSG00000041075	Fzd7	9.53826	9.94442	9.49726	9.71811	9.27412	9.92246	9.65998	9.63823	-0.0217513	0.904113	0.975863
ENSMUSG00000112105	RP23-36K2.5	0	2.8762	0	2.77871	3.16489	2.79899	0.958733	2.9142	1.95546	0.380458	0.817413
ENSMUSG00000079481	Nhsl2	5.82756	6.0376	6.36288	6.32449	4.76461	6.59025	6.07601	5.89312	-0.182893	0.940862	0.985707
ENSMUSG00000079487	Med12	10.2578	10.0169	9.96099	9.91054	9.45816	9.6395	10.0786	9.6694	-0.409168	0.00511197	0.0597136
ENSMUSG00000079484	Phyhd1	10.8261	10.6049	9.60022	10.653	9.99252	10.4176	10.3438	10.3544	0.0106239	0.883991	0.973703
ENSMUSG00000079489	C030013D06Rik	0	2.26462	3.13688	1.97497	2.74241	0	1.8005	1.57246	-0.228041	0.840775	0.962074
ENSMUSG00000106386	Gm42991	0	2.60258	0	0	0	0	0.867526	0	-0.867526	0.470403	0.817413
ENSMUSG00000081895	Rpl17-ps10	7.98517	7.79251	7.82712	8.27725	8.19192	7.73847	7.86827	8.06921	0.200947	0.282118	0.779395
ENSMUSG00000110077	Gm45632	2.31759	3.10611	0	0	2.4734	0	1.8079	0.824466	-0.983433	0.606538	0.854342
ENSMUSG00000058163	Gm5431	4.7136	4.91523	6.24071	5.66762	4.8238	4.51422	5.28984	5.00188	-0.287965	0.504278	0.817413
ENSMUSG00000000093	Tbx2	6.2862	6.96931	6.81217	6.61072	7.03094	6.49814	6.68923	6.71327	0.0240409	0.9542	0.989963
ENSMUSG00000050777	Tmem37	11.0296	10.8984	10.7327	11.1714	11.5367	10.9952	10.8869	11.2344	0.347528	0.0100227	0.0978921
ENSMUSG00000044254	Pcsk9	10.1856	10.0808	10.4068	10.7979	10.8334	10.5799	10.2244	10.7371	0.51266	3.24e-05	0.00101011
ENSMUSG00000040389	Wdr47	5.64813	5.62059	6.10723	6.12687	5.54024	6.9561	5.79198	6.20774	0.415754	0.239035	0.726886
ENSMUSG00000040385	Ppp1ca	12.8147	12.5383	12.3893	12.6107	12.8695	12.6375	12.5808	12.7059	0.12512	0.3407	0.817413
ENSMUSG00000040387	Klhl32	0	0	0	0	2.96906	3.16125	0	2.04344	2.04344	0.212746	0.687015
ENSMUSG00000040380	Cbln3	0	5.4215	4.85018	5.11723	3.33728	4.23868	3.42389	4.23106	0.807172	0.822834	0.954775
ENSMUSG00000040383	Aqr	9.90497	10.1693	10.1609	10.2479	10.2244	10.3879	10.0784	10.2867	0.208351	0.100606	0.462541
ENSMUSG00000109209	Gm45104	3.69543	2.60258	0	1.30194	2.4734	0	2.09934	1.25844	-0.840892	0.476396	0.817413
ENSMUSG00000109205	Gm44954	1.87053	0	2.71561	1.97497	0	0	1.52871	0.658323	-0.87039	0.624747	0.864615
ENSMUSG00000041920	Slc16a6	7.77377	8.12956	9.1064	8.72483	8.47182	8.75513	8.33658	8.65059	0.314013	0.451317	0.817413
ENSMUSG00000041921	Metap1d	9.37179	9.35926	9.4498	10.0164	9.76418	9.66444	9.39362	9.81501	0.421389	0.00154424	0.0237559
ENSMUSG00000041926	Rnpep	9.5201	9.61634	9.56247	10.0164	9.99414	9.93423	9.5663	9.98159	0.415285	0.000414426	0.00832493
ENSMUSG00000090150	Acad11	14.2527	14.379	14.1115	14.1305	14.1106	14.1778	14.2478	14.1396	-0.108112	0.233437	0.719449
ENSMUSG00000090152	Gm16285	0	0	0	4.4275	0	0	0	1.47583	1.47583	0.206616	0.678515
ENSMUSG00000055691	Gja6	4.08236	2.60258	0	3.05797	1.71227	0	2.22831	1.59008	-0.638234	0.536363	0.820333
ENSMUSG00000055692	Tmem191c	3.53936	4.12842	3.72805	4.09774	4.70289	0	3.79861	2.93355	-0.865065	0.922521	0.980784
ENSMUSG00000089542	Gm25835	1.87053	2.8762	1.69041	1.30194	2.14245	0	2.14571	1.14813	-0.997581	0.578835	0.835153
ENSMUSG00000021268	Meg3	4.91759	4.12842	2.71561	6.58892	5.43028	5.66285	3.92054	5.89402	1.97348	0.00183701	0.0269366
ENSMUSG00000040037	Negr1	0	0	0	2.4321	0	0	0	0.810701	0.810701	0.462958	0.817413
ENSMUSG00000040035	Disp2	6.23623	6.46796	6.2618	0	0	4.74549	6.322	1.58183	-4.74017	0.224113	0.704611
ENSMUSG00000040034	Nup43	6.70887	6.54836	6.49345	6.95548	6.85768	7.15018	6.58356	6.98778	0.404218	0.146232	0.57065
ENSMUSG00000040033	Stat2	9.54597	9.82037	10.2871	9.98128	10.0086	9.66444	9.88449	9.88476	0.000263653	0.879713	0.972559
ENSMUSG00000094897	Gm22288	0	0	1.69041	0	0	1.57846	0.56347	0.526153	-0.0373168	0.948846	0.988416
ENSMUSG00000061740	Cyp2d22	13.1283	12.9441	12.9406	13.267	13.3354	13.3838	13.0043	13.3287	0.324378	0.000493995	0.00961084
ENSMUSG00000061742	Slc22a12	0	0	2.71561	0	0	4.23868	0.905204	1.41289	0.507689	0.524122	0.820333
ENSMUSG00000105925	Gm43846	0	1.82247	0	0	0	0	0.607489	0	-0.607489	0.504143	0.817413
ENSMUSG00000105929	Gm43693	1.87053	0	0	0	0	0	0.623509	0	-0.623509	0.502529	0.817413
ENSMUSG00000105928	Gm9256	4.47595	4.22943	4.60813	4.09774	4.76461	4.63448	4.43784	4.49895	0.0611092	0.899088	0.975863
ENSMUSG00000015095	Fbxw5	9.80569	10.0942	9.96903	10.2806	10.2914	10.1887	9.95632	10.2536	0.297241	0.015999	0.13509
ENSMUSG00000015094	Npdc1	6.15788	6.52868	5.76712	5.93285	6.9268	6.18019	6.15122	6.34662	0.195392	0.534181	0.820333
ENSMUSG00000015093	Clic3	0	3.30436	0	1.97497	3.16489	0	1.10145	1.71328	0.61183	0.887651	0.975099
ENSMUSG00000015092	Edf1	10.6947	10.9259	11.0164	10.9021	11.1169	10.7326	10.879	10.9172	0.0381451	0.761935	0.933002
ENSMUSG00000015090	Ptgds	3.1651	3.47864	4.05245	0	0	0	3.5654	0	-3.5654	0.0224299	0.17241
ENSMUSG00000056342	Usp34	11.4829	11.4449	11.0342	11.3778	11.251	11.57	11.3207	11.3996	0.078941	0.625271	0.865009
ENSMUSG00000038372	Gmds	6.13079	6.17056	6.36288	6.06505	5.57511	6.05647	6.22141	5.89888	-0.322531	0.361356	0.817413
ENSMUSG00000065246	Gm22297	1.21929	0	0	0	0	0	0.406432	0	-0.406432	0.552776	0.820333
ENSMUSG00000047565	Acot10	2.31759	1.82247	2.44757	0	1.71227	3.16125	2.19588	1.6245	-0.571371	0.929981	0.983047
ENSMUSG00000057691	Zfp746	9.85618	10.2526	10.0531	9.7055	9.91639	10.0305	10.054	9.88414	-0.169827	0.198536	0.664986
ENSMUSG00000057697	Vmn1r53	0	0	1.69041	3.05797	0	0	0.56347	1.01932	0.455852	0.638895	0.871667
ENSMUSG00000057696	Rpl30-ps1	2.31759	1.18169	1.0798	2.77871	1.71227	2.31412	1.52636	2.26837	0.742006	0.607777	0.855166
ENSMUSG00000053338	Tarm1	2.31759	0	0	0	0	0	0.77253	0	-0.77253	0.481172	0.817413
ENSMUSG00000085400	Pard3bos3	2.6584	3.77445	2.71561	3.96864	3.75725	0	3.04948	2.5753	-0.474188	0.846512	0.964077
ENSMUSG00000085404	Gm12909	7.51555	8.02103	8.84156	8.89437	8.95476	8.44559	8.12605	8.76491	0.638861	0.0378298	0.249522
ENSMUSG00000085408	C530005A16Rik	4.38715	2.8762	0	4.61174	0	0	2.42112	1.53725	-0.883871	0.96057	0.990824
ENSMUSG00000053332	Gas5	9.71511	9.49479	9.56247	9.54494	9.4721	9.25469	9.59079	9.42391	-0.166877	0.226976	0.709609
ENSMUSG00000053333	Dis3l2	8.67992	8.9789	8.93644	9.42396	9.00677	9.29631	8.86509	9.24234	0.377259	0.020929	0.163568
ENSMUSG00000053334	Ficd	9.66877	9.36482	9.39119	9.64076	9.97305	9.50398	9.47493	9.70593	0.231001	0.11756	0.504747
ENSMUSG00000109975	Gm19196	0	2.60258	3.72805	0	0	0	2.11021	0	-2.11021	0.189095	0.649641
ENSMUSG00000109970	Gm17995	2.6584	0	0	0	0	0	0.886133	0	-0.886133	0.469268	0.817413
ENSMUSG00000038845	Phb	11.873	11.6231	11.6572	11.5854	11.7896	11.6824	11.7178	11.6858	-0.0319678	0.724523	0.916485
ENSMUSG00000038844	Kif16b	9.65695	9.72629	9.91013	9.36425	9.46978	9.66444	9.76446	9.49949	-0.264967	0.0432243	0.27364
ENSMUSG00000038843	Gcnt1	3.36433	4.22943	4.85018	3.29184	4.42564	3.89778	4.14798	3.87175	-0.276228	0.662038	0.886259
ENSMUSG00000076271	Mir697	0	0	0	0	1.09651	0	0	0.365505	0.365505	0.530725	0.820333
ENSMUSG00000038848	Ythdf1	11.2928	11.2392	11.4057	11.1842	11.1124	11.152	11.3126	11.1495	-0.16302	0.0776473	0.397362
ENSMUSG00000110244	Gm2253	2.93388	3.10611	3.72805	1.97497	1.71227	0	3.25601	1.22908	-2.02693	0.151283	0.581318
ENSMUSG00000110245	Gm20100	2.31759	1.82247	0	3.05797	2.14245	0	1.38002	1.73347	0.353455	0.726145	0.917509
ENSMUSG00000064590	Gm22301	0	0	0	0	0	1.57846	0	0.526153	0.526153	0.506163	0.817413
ENSMUSG00000018362	Kpna2	10.983	11.2179	10.9554	10.8606	10.7812	11.1072	11.0521	10.9163	-0.135761	0.248757	0.738324
ENSMUSG00000018363	Smurf2	11.4896	11.6132	11.5168	11.4208	11.3543	11.4645	11.5399	11.4132	-0.126653	0.163471	0.604081
ENSMUSG00000016018	Skiv2l2	9.91096	10.0791	10.1411	10.0245	10.1669	9.92541	10.0437	10.039	-0.00475076	0.95956	0.99074
ENSMUSG00000066571	4931406P16Rik	10.1096	9.73919	10.2374	10.0823	9.9665	9.69242	10.0287	9.91372	-0.115026	0.418746	0.817413
ENSMUSG00000103439	Gm7019	1.87053	2.60258	2.94157	3.29184	0	0	2.47156	1.09728	-1.37428	0.710287	0.908576
ENSMUSG00000103436	Gm36995	3.69543	4.22943	7.26287	0	4.08213	4.84855	5.06258	2.97689	-2.08568	0.26981	0.76316
ENSMUSG00000103433	Gm2272	0	1.18169	0	0	0	0	0.393897	0	-0.393897	0.55464	0.820333
ENSMUSG00000103432	6720464F23Rik	2.93388	2.60258	0	3.29184	0	3.16125	1.84549	2.15103	0.305542	0.779619	0.939538
ENSMUSG00000064620	Gm22303	0	0	1.69041	0	0	0	0.56347	0	-0.56347	0.511179	0.817413
ENSMUSG00000064626	Gm22306	0	1.18169	0	0	0	0	0.393897	0	-0.393897	0.55464	0.820333
ENSMUSG00000020349	Ppp2ca	12.6239	12.5485	12.5743	12.4601	12.5475	12.7553	12.5822	12.5877	0.00545096	0.954789	0.990178
ENSMUSG00000054648	Zfp869	8.68459	9.09722	8.90327	8.79315	8.80858	8.99868	8.89502	8.8668	-0.0282193	0.789947	0.943627
ENSMUSG00000107534	Gm43920	0	2.26462	0	0	1.71227	0	0.754874	0.570755	-0.184118	0.861285	0.967874
ENSMUSG00000054641	Mmrn1	6.70887	5.76219	6.36288	6.86768	6.5943	6.05647	6.27798	6.50615	0.228171	0.530135	0.820333
ENSMUSG00000037001	Zfp39	8.20891	8.05583	7.96211	6.921	8.03797	7.4579	8.07562	7.47229	-0.603333	0.0402351	0.260412
ENSMUSG00000070462	Mesdc1	8.21537	8.12301	8.03131	8.7496	8.06275	8.1247	8.12323	8.31235	0.189118	0.303392	0.80004
ENSMUSG00000048387	Osr1	4.19127	0	0	4.52256	4.8238	0	1.39709	3.11545	1.71836	0.654834	0.88156
ENSMUSG00000110867	RP23-311C13.3	4.55959	4.64962	5.10485	5.05498	5.0389	4.94475	4.77135	5.01288	0.241522	0.677354	0.894732
ENSMUSG00000033253	Szt2	8.83484	9.18787	9.29981	9.41779	9.2283	8.81362	9.10751	9.15324	0.0457306	0.764993	0.934256
ENSMUSG00000103771	Gm36934	2.31759	0	0	0	0	0	0.77253	0	-0.77253	0.481172	0.817413
ENSMUSG00000048388	Fam171b	6.13079	5.76219	7.03681	4.85032	5.73783	5.19995	6.30993	5.2627	-1.04723	0.0128762	0.11671
ENSMUSG00000033257	Ttll4	10.2672	10.1788	9.73265	10.0062	9.84675	9.74012	10.0595	9.86434	-0.195194	0.163464	0.604081
ENSMUSG00000033256	Shf	7.58706	7.94138	7.18771	7.38035	7.46197	7.56772	7.57205	7.47001	-0.102039	0.575732	0.833042
ENSMUSG00000021959	Lats2	10.0781	10.1452	10.4716	9.93882	10.1468	10.1589	10.2316	10.0815	-0.150105	0.222023	0.701512
ENSMUSG00000021958	Pinx1	6.01703	6.90968	7.56394	7.36761	7.39524	7.47411	6.83021	7.41232	0.582104	0.175145	0.625305
ENSMUSG00000021951	Eef1akmt1	5.86092	6.50872	6.42029	7.43024	7.16286	7.56772	6.26331	7.38694	1.12363	0.00012386	0.00307098
ENSMUSG00000021950	Anxa8	2.31759	0	0	5.34238	5.88404	5.1198	0.77253	5.44874	4.67621	3.82e-07	2e-05
ENSMUSG00000030051	Aplf	7.34922	7.40685	6.51117	6.49827	6.20664	6.8105	7.08908	6.50514	-0.583942	0.0489417	0.296451
ENSMUSG00000021957	Tkt	12.5246	12.4154	12.6299	12.671	12.803	12.7167	12.5233	12.7302	0.206937	0.0280393	0.20201
ENSMUSG00000071072	Ptges3	12.1946	12.0016	12.2425	12.0646	12.2426	12.2036	12.1462	12.1703	0.0240319	0.84937	0.964561
ENSMUSG00000100160	Gm28527	1.21929	1.18169	1.0798	0	1.09651	1.57846	1.16026	0.891658	-0.268604	0.925051	0.98142
ENSMUSG00000071076	Jund	11.5598	11.5185	11.4846	11.0855	11.2037	11.4002	11.521	11.2298	-0.291182	0.00573064	0.065192
ENSMUSG00000100164	2610306M01Rik	3.69543	3.30436	5.32124	5.39358	4.70289	5.03493	4.10701	5.0438	0.936787	0.302172	0.798515
ENSMUSG00000071074	Yipf3	11.0259	10.7659	10.9252	10.6345	10.9845	11.0161	10.9057	10.8784	-0.0272936	0.836712	0.961368
ENSMUSG00000019102	Aldh3a1	2.31759	0	0	0	0	0	0.77253	0	-0.77253	0.481172	0.817413
ENSMUSG00000036555	Iqce	7.02068	7.28307	6.90894	7.44245	7.46197	6.83581	7.0709	7.24674	0.175847	0.448362	0.817413
ENSMUSG00000036550	Cnot1	11.9865	12.2442	12.054	12.1217	12.1788	12.1479	12.0949	12.1495	0.0545806	0.644416	0.875668
ENSMUSG00000036553	Sh3tc1	7.79118	7.18587	7.96211	7.17621	6.85768	7.06712	7.64639	7.03367	-0.612718	0.0126687	0.115427
ENSMUSG00000036552	Ermard	8.46897	8.50184	8.26863	9.02593	9.0723	9.21666	8.41315	9.10497	0.691819	1.07e-05	0.000391888
ENSMUSG00000091580	Gm6467	7.02068	6.84748	6.56307	7.0057	6.97981	7.55253	6.81041	7.17935	0.368939	0.18551	0.644157
ENSMUSG00000091587	Gm17191	0	0	1.69041	0	0	0	0.56347	0	-0.56347	0.511179	0.817413
ENSMUSG00000091586	Cyp4f17	8.63724	8.63208	8.23169	8.53837	8.41521	8.42906	8.50034	8.46088	-0.0394592	0.76627	0.934635
ENSMUSG00000055994	Nod2	0	2.26462	0	3.96864	0	3.45056	0.754874	2.47307	1.71819	0.241038	0.72922
ENSMUSG00000055991	Zkscan5	9.08822	8.75577	9.23196	9.35782	9.03835	9.38042	9.02532	9.25886	0.233544	0.178225	0.630952
ENSMUSG00000108751	Gm45217	0	1.18169	0	0	0	0	0.393897	0	-0.393897	0.55464	0.820333
ENSMUSG00000108750	Gm44750	2.93388	3.47864	3.46253	0	2.4734	2.79899	3.29168	1.75746	-1.53422	0.323594	0.817413
ENSMUSG00000108753	Gm45094	2.31759	1.82247	3.30888	2.4321	2.4734	0	2.48298	1.63517	-0.847811	0.651949	0.879877
ENSMUSG00000108752	Gm45191	2.6584	0	0	0	0	0	0.886133	0	-0.886133	0.469268	0.817413
ENSMUSG00000023084	Lrrc71	0	1.82247	0	0	0	0	0.607489	0	-0.607489	0.504143	0.817413
ENSMUSG00000023087	Noct	9.68749	10.8053	10.3635	9.31862	11.221	11.0216	10.2854	10.5204	0.234961	0.550826	0.820333
ENSMUSG00000047875	Gpr157	6.78035	7.23529	7.32432	6.67421	6.04193	5.54503	7.11332	6.08706	-1.02626	0.00375842	0.0472247
ENSMUSG00000104555	Gm5983	1.21929	1.18169	1.0798	0	0	0	1.16026	0	-1.16026	0.483902	0.817413
ENSMUSG00000030788	Rnf141	10.7625	10.7069	11.0418	10.7544	10.7923	10.9481	10.8371	10.8316	-0.00545594	0.892186	0.975863
ENSMUSG00000030789	Itgax	0	5.82809	6.56307	3.29184	4.57092	3.89778	4.13039	3.92018	-0.21021	0.32007	0.815331
ENSMUSG00000030786	Itgam	4.29253	4.0198	0	3.96864	5.08801	3.89778	2.77078	4.31814	1.54737	0.3775	0.817413
ENSMUSG00000097292	A230107N01Rik	3.1651	2.26462	0	0	0	0	1.80991	0	-1.80991	0.285264	0.783413
ENSMUSG00000030785	Cox6a2	0	0	0	3.49303	0	0	0	1.16434	1.16434	0.370277	0.817413
ENSMUSG00000030782	Tgfb1i1	6.78035	4.91523	6.19758	6.15681	5.88404	5.96767	5.96438	6.00284	0.0384582	0.74004	0.92399
ENSMUSG00000023088	Abcc1	6.84845	6.7144	6.43893	6.35064	6.52466	6.70457	6.66726	6.52662	-0.140635	0.613779	0.858265
ENSMUSG00000030780	BC017158	9.38045	9.61167	9.83296	9.54494	10.0618	9.95747	9.60836	9.85473	0.246371	0.123207	0.519173
ENSMUSG00000097294	Gm26888	0	2.26462	0	0	0	0	0.754874	0	-0.754874	0.482514	0.817413
ENSMUSG00000091639	Gm3756	3.96455	3.77445	4.14618	4.09774	4.98805	3.45056	3.96172	4.17878	0.217061	0.606819	0.854416
ENSMUSG00000033788	Dysf	7.62639	6.86328	8.17165	8.0488	7.3756	7.08834	7.55377	7.50425	-0.0495275	0.787314	0.942309
ENSMUSG00000109353	Gm45183	0	1.18169	0	0	0	0	0.393897	0	-0.393897	0.55464	0.820333
ENSMUSG00000096810	Gm10481	2.31759	1.18169	1.69041	2.77871	2.14245	2.79899	1.7299	2.57338	0.843487	0.528486	0.820333
ENSMUSG00000049265	Kcnk3	5.79341	5.13945	4.67256	4.4275	4.17597	4.23868	5.20181	4.28072	-0.921091	0.080705	0.406369
ENSMUSG00000038065	Mturn	6.01703	5.82809	5.64399	5.86191	5.91158	4.51422	5.8297	5.42924	-0.400463	0.55845	0.823412
ENSMUSG00000105263	Gm42427	2.31759	1.18169	1.0798	1.30194	1.71227	1.57846	1.52636	1.53089	0.00452714	0.946823	0.987831
ENSMUSG00000105260	Gm42434	3.83626	2.8762	5.1508	4.4275	4.50011	2.79899	3.95442	3.90886	-0.0455551	0.856303	0.966417
ENSMUSG00000038060	Dlec1	0	2.60258	4.39557	3.82684	4.42564	0	2.33271	2.75083	0.418113	0.747921	0.926341
ENSMUSG00000097747	Gm26534	0	0	2.1181	4.32573	3.63038	0	0.706034	2.65204	1.946	0.14171	0.561341
ENSMUSG00000097746	Gm6225	2.6584	3.90233	0	0	3.16489	0	2.18691	1.05496	-1.13195	0.548616	0.820333
ENSMUSG00000038069	Cdkn2aip	8.5783	8.78511	8.07962	8.76426	8.53517	8.69416	8.48101	8.66453	0.183522	0.440633	0.817413
ENSMUSG00000037202	Prf1	0	0	4.9575	0	0	0	1.6525	0	-1.6525	0.146465	0.571363
ENSMUSG00000037206	Islr	6.13079	6.33826	6.2618	6.52148	6.39406	6.18019	6.24362	6.36524	0.121624	0.693329	0.901308
ENSMUSG00000030255	Sspn	6.44859	5.4215	6.56307	6.831	6.64441	6.59025	6.14439	6.68856	0.544168	0.184908	0.643304
ENSMUSG00000037204	Atg101	9.26682	9.51744	9.49948	9.23337	9.49048	9.47205	9.42792	9.39863	-0.029284	0.807425	0.949771
ENSMUSG00000030257	Srgap3	5.9254	6.74883	5.98572	7.64617	7.77852	8.02919	6.21998	7.81796	1.59798	3.72e-08	2.5e-06
ENSMUSG00000030259	Rassf8	10.7547	11.0885	11.1728	10.289	10.61	10.9782	11.0054	10.6257	-0.379635	0.0193231	0.154504
ENSMUSG00000087298	Gm9392	6.35805	6.3607	6.05985	6.49827	6.09094	6.18019	6.25953	6.25647	-0.00306302	0.995384	0.998091
ENSMUSG00000031785	Adgrg1	6.59454	6.67912	6.57997	6.81231	6.13834	5.92113	6.61788	6.29059	-0.32728	0.407761	0.817413
ENSMUSG00000031787	Katnb1	5.7226	6.17056	6.19758	7.11651	6.7397	6.18019	6.03025	6.6788	0.648555	0.0471128	0.289905
ENSMUSG00000031781	Ciapin1	9.18359	9.49732	9.1858	9.2014	9.06005	9.25469	9.2889	9.17205	-0.116856	0.38562	0.817413
ENSMUSG00000031780	Ccl17	0	0	0	0	2.4734	0	0	0.824466	0.824466	0.46085	0.817413
ENSMUSG00000031783	Polr2c	9.65458	9.77096	9.64104	9.35782	9.16962	9.42279	9.68886	9.31674	-0.372113	0.00432252	0.0526159
ENSMUSG00000031782	Coq9	11.5088	11.5974	11.21	11.6793	11.7343	11.7211	11.4387	11.7116	0.272868	0.0241006	0.181585
ENSMUSG00000031789	Cngb1	0	0	3.72805	2.4321	0	2.79899	1.24268	1.7437	0.501015	0.898664	0.975863
ENSMUSG00000031788	Kifc3	8.76608	8.98252	9.5518	9.25083	9.44879	9.207	9.10013	9.3022	0.20207	0.380619	0.817413
ENSMUSG00000034254	Agpat1	9.06694	8.77679	9.20226	8.82147	9.35158	9.27334	9.01533	9.14879	0.133466	0.429902	0.817413
ENSMUSG00000083627	Gm12502	1.21929	1.82247	0	0	1.09651	0	1.01392	0.365505	-0.648415	0.702792	0.905274
ENSMUSG00000105120	Gm26413	1.21929	1.18169	1.0798	0	0	0	1.16026	0	-1.16026	0.483902	0.817413
ENSMUSG00000083626	Gm4459	6.76281	5.85995	6.24071	6.15681	6.13834	6.36539	6.28782	6.22018	-0.0676403	0.738098	0.923481
ENSMUSG00000090213	Tmem189	9.91096	9.72845	9.95777	9.75038	10.0786	9.76339	9.86572	9.86411	-0.00160961	0.982803	0.994621
ENSMUSG00000090210	Itga10	5.5696	5.33347	5.28048	4.09774	4.70289	3.16125	5.39452	3.98729	-1.40722	0.028397	0.203752
ENSMUSG00000031125	3830403N18Rik	0	0	0	4.61174	0	0	0	1.53725	1.53725	0.17905	0.631928
ENSMUSG00000090217	Gm16116	3.1651	3.10611	0	3.29184	3.98175	0	2.0904	2.42453	0.334125	0.681439	0.896066
ENSMUSG00000090215	Trim34b	2.31759	0	0	0	3.16489	0	0.77253	1.05496	0.282432	0.739883	0.92399
ENSMUSG00000031129	Slc9a9	7.56699	7.24738	7.2733	6.98915	6.88573	6.14012	7.36256	6.67167	-0.690888	0.023168	0.17654
ENSMUSG00000034259	Exosc4	9.10224	9.27905	8.9133	8.88992	9.45348	9.03191	9.0982	9.1251	0.0269076	0.821768	0.954118
ENSMUSG00000105482	Gm42596	0	5.08658	0	0	0	0	1.69553	0	-1.69553	0.130761	0.536275
ENSMUSG00000105485	Gm42447	0	0	0	2.4321	1.71227	0	0	1.38146	1.38146	0.415345	0.817413
ENSMUSG00000034570	Inpp5j	0	0	2.44757	0	0	0	0.815857	0	-0.815857	0.475452	0.817413
ENSMUSG00000034573	Ptpn13	5.15123	3.90233	4.67256	5.11723	5.0389	5.1198	4.57537	5.09197	0.5166	0.436841	0.817413
ENSMUSG00000034575	Papd7	10.0781	10.1724	9.83999	10.1912	10.2257	9.65736	10.0302	10.0247	-0.00540856	0.946608	0.987807
ENSMUSG00000034574	Daam1	10.6749	10.9409	11.2762	11.1969	11.3976	11.0353	10.964	11.2099	0.245894	0.113883	0.495595
ENSMUSG00000048600	Gm5763	5.03913	5.54422	0	6.37632	4.93535	6.25715	3.52778	5.85627	2.32849	0.412262	0.817413
ENSMUSG00000048603	Gm9828	3.53936	2.26462	1.69041	3.29184	3.98175	3.16125	2.49813	3.47828	0.980148	0.408133	0.817413
ENSMUSG00000062082	Cd200r4	2.31759	0	0	0	0	0	0.77253	0	-0.77253	0.481172	0.817413
ENSMUSG00000028717	Tal1	5.35226	5.13945	6.30309	4.61174	4.8238	3.45056	5.59827	4.29536	-1.3029	0.0227068	0.173896
ENSMUSG00000062081	Gm6055	7.58706	8.1997	7.4491	7.74804	7.77102	7.89114	7.74529	7.8034	0.0581151	0.951575	0.989306
ENSMUSG00000096206	Gm22317	0	1.18169	2.71561	0	0	0	1.2991	0	-1.2991	0.42769	0.817413
ENSMUSG00000061974	Cldn24	0	1.82247	0	0	0	2.31412	0.607489	0.771374	0.163885	0.885164	0.973813
ENSMUSG00000025666	Tmem47	7.69273	5.95151	7.98131	6.831	7.64541	6.70457	7.20852	7.06033	-0.148187	0.432796	0.817413
ENSMUSG00000025665	Rps6ka6	0	2.8762	0	0	0	0	0.958733	0	-0.958733	0.462641	0.817413
ENSMUSG00000021179	Nrde2	8.44167	8.57565	9.11512	7.8153	8.76772	8.54101	8.71081	8.37467	-0.336139	0.182939	0.640033
ENSMUSG00000021178	Psmc1	12.0479	12.0347	12.0384	12.0924	12.1024	12.084	12.0403	12.093	0.0526078	0.559702	0.823631
ENSMUSG00000102282	A930032L01Rik	0	1.82247	0	0	0	0	0.607489	0	-0.607489	0.504143	0.817413
ENSMUSG00000021177	Tdp1	6.8975	7.19839	7.31426	6.88567	6.72425	7.08834	7.13671	6.89942	-0.237295	0.335319	0.817413
ENSMUSG00000021176	Efcab11	0	2.26462	0	0	0	0	0.754874	0	-0.754874	0.482514	0.817413
ENSMUSG00000021175	Cdca7l	2.93388	0	0	0	0	3.16125	0.977961	1.05375	0.0757885	0.939317	0.985414
ENSMUSG00000103885	Gm37006	1.87053	0	1.0798	0	0	0	0.983442	0	-0.983442	0.483429	0.817413
ENSMUSG00000103887	Gm37008	2.31759	0	0	1.30194	0	2.31412	0.77253	1.20535	0.432823	0.892997	0.975863
ENSMUSG00000103880	Gm37009	1.21929	1.18169	1.69041	0	0	0	1.3638	0	-1.3638	0.462113	0.817413
ENSMUSG00000103881	Gm10748	0	0	0	0	2.74241	2.31412	0	1.68551	1.68551	0.322164	0.816455
ENSMUSG00000021669	Col4a3bp	10.3341	10.5692	10.4044	10.1545	10.3442	10.6915	10.4359	10.3967	-0.0391403	0.813422	0.951037
ENSMUSG00000104880	AL645522.1	0	1.18169	0	0	0	0	0.393897	0	-0.393897	0.55464	0.820333
ENSMUSG00000024048	Myl12a	10.4807	10.4315	10.6421	10.4534	10.4288	10.9994	10.5181	10.6272	0.109043	0.402311	0.817413
ENSMUSG00000024042	Sik1	9.90897	9.98109	10.5107	9.09329	9.59399	9.43526	10.1336	9.37418	-0.759391	7.73e-06	0.000294328
ENSMUSG00000024043	Arhgap28	3.1651	3.90233	3.95221	0	4.42564	4.94475	3.67322	3.12346	-0.549751	0.665219	0.887402
ENSMUSG00000074364	Ehd2	7.61665	7.21079	6.56307	7.30213	7.27315	7.10925	7.13017	7.22817	0.0980007	0.890304	0.975772
ENSMUSG00000098850	Gm27390	1.21929	0	1.0798	1.30194	2.4734	1.57846	0.766365	1.7846	1.01823	0.515441	0.817413
ENSMUSG00000044442	N6amt1	8.45811	7.87277	8.17165	8.14157	8.83039	8.96467	8.16751	8.64554	0.478031	0.0274358	0.199043
ENSMUSG00000068011	Mkrn2os	9.51225	8.94959	9.15231	9.76989	9.59399	9.38899	9.20472	9.58429	0.379574	0.0255973	0.189186
ENSMUSG00000044441	Olfr1442	2.93388	2.26462	1.69041	2.4321	0	0	2.2963	0.810701	-1.4856	0.502419	0.817413
ENSMUSG00000068014	Gm14648	5.86092	5.79552	5.73731	5.53709	6.04193	5.87304	5.79791	5.81736	0.0194436	0.930885	0.983168
ENSMUSG00000042298	Ttc19	10.6321	10.599	10.3961	10.6372	10.7462	10.3245	10.5424	10.5693	0.0269209	0.797955	0.94634
ENSMUSG00000042293	Gm5617	7.79981	7.79251	7.52084	8.39498	8.6211	8.32566	7.70439	8.44725	0.742861	0.000102468	0.00261204
ENSMUSG00000042292	Mkl1	8.64684	8.28431	8.45416	8.50384	8.22523	7.39117	8.46177	8.04008	-0.421689	0.143978	0.566495
ENSMUSG00000034168	Irf2bpl	10.2578	10.4021	10.2092	10.4906	10.3617	10.4363	10.2897	10.4295	0.139831	0.232768	0.718795
ENSMUSG00000044199	S1pr4	4.63865	2.8762	3.60139	0	3.16489	3.69143	3.70541	2.28544	-1.41997	0.354191	0.817413
ENSMUSG00000022223	Sdr39u1	8.60807	8.68195	8.06769	8.63727	9.05697	8.36095	8.45257	8.68506	0.23249	0.267352	0.76177
ENSMUSG00000044197	Gpr146	11.563	11.1077	12.0494	11.0855	11.3026	11.3116	11.5734	11.2332	-0.340168	0.0224646	0.172503
ENSMUSG00000021335	Slc17a1	8.80516	8.50688	8.56861	7.84319	8.43907	8.10401	8.62688	8.12876	-0.498129	0.0133652	0.119726
ENSMUSG00000058761	Rnf169	10.9859	10.9297	10.7919	10.812	10.908	10.604	10.9025	10.7747	-0.127819	0.273941	0.768516
ENSMUSG00000001870	Ltbp1	6.8975	5.62059	6.2193	7.02206	6.52466	6.67683	6.2458	6.74118	0.495386	0.243462	0.732462
ENSMUSG00000027531	Impa1	10.3994	10.7276	10.6065	10.5762	10.5608	10.6898	10.5778	10.6089	0.0311052	0.864993	0.968972
ENSMUSG00000075010	AW112010	10.4821	10.2911	10.728	10.5886	10.6757	10.6132	10.5004	10.6258	0.125435	0.363431	0.817413
ENSMUSG00000027533	Fabp5	9.32774	9.70232	10.3277	10.1711	8.99071	9.35438	9.78593	9.50541	-0.280518	0.573851	0.831488
ENSMUSG00000075012	Fjx1	3.53936	4.32383	2.44757	0	3.98175	2.31412	3.43692	2.09862	-1.3383	0.510346	0.817413
ENSMUSG00000075015	Gm10801	3.83626	4.32383	5.00831	4.52256	4.98805	4.94475	4.38946	4.81845	0.428987	0.554071	0.820333
ENSMUSG00000075014	Gm10800	4.85274	5.50446	6.8955	6.03312	6.75498	6.43329	5.7509	6.40713	0.65623	0.363038	0.817413
ENSMUSG00000027536	Chmp4c	5.82756	7.68989	7.76199	6.71503	6.52466	5.87304	7.09315	6.37091	-0.722236	0.0271458	0.197565
ENSMUSG00000080929	Gm12891	0	1.18169	1.0798	0	1.09651	1.57846	0.753831	0.891658	0.137828	0.921372	0.98011
ENSMUSG00000080928	Hmgb1-ps6	2.31759	1.18169	1.0798	1.30194	1.09651	1.57846	1.52636	1.32564	-0.200723	0.832302	0.959284
ENSMUSG00000080921	Rpl38-ps2	8.36818	8.06952	8.17722	7.82465	8.47643	7.91509	8.20497	8.07206	-0.132914	0.628458	0.866685
ENSMUSG00000080922	Gm2214	0	0	0	1.30194	0	0	0	0.433979	0.433979	0.518877	0.817413
ENSMUSG00000025184	R3hcc1l	9.44785	9.34526	9.20226	9.31198	9.24734	9.02092	9.33179	9.19342	-0.138375	0.347019	0.817413
ENSMUSG00000005553	Atp4a	5.39843	3.77445	4.60813	0	0	0	4.59367	0	-4.59367	0.000193061	0.00449427
ENSMUSG00000029146	Snx17	8.8137	8.96432	8.97207	8.81679	8.57016	9.04282	8.9167	8.80992	-0.106776	0.512137	0.817413
ENSMUSG00000040631	Dok4	4.47595	5.46357	5.28048	3.05797	4.76461	0	5.07333	2.60753	-2.46581	0.0659803	0.357759
ENSMUSG00000082207	Gm12998	0	3.10611	0	0	0	0	1.03537	0	-1.03537	0.452683	0.817413
ENSMUSG00000082208	Gm15379	0	2.8762	2.1181	0	1.09651	0	1.66477	0.365505	-1.29926	0.405457	0.817413
ENSMUSG00000023791	Pigx	8.80516	9.00406	9.0408	9.04607	8.65409	8.54101	8.95001	8.74706	-0.202952	0.265371	0.758868
ENSMUSG00000094076	Gm4767	5.5696	5.46357	0	0	5.64242	5.66285	3.67772	3.76842	0.0906992	0.958197	0.99074
ENSMUSG00000021400	Wrnip1	10.4302	10.9165	10.6502	10.4367	10.3353	10.2346	10.6656	10.3355	-0.3301	0.0108121	0.103503
ENSMUSG00000102837	Gm37383	0	1.82247	1.69041	0	0	0	1.17096	0	-1.17096	0.472808	0.817413
ENSMUSG00000047368	Abhd17b	10.2657	10.2541	10.77	10.5941	10.3902	10.9024	10.4299	10.6289	0.198946	0.23599	0.721919
ENSMUSG00000065607	Mir331	0	0	0	0	1.09651	0	0	0.365505	0.365505	0.530725	0.820333
ENSMUSG00000042901	Aida	8.20242	7.39603	8.19925	7.72823	8.27909	8.54101	7.93257	8.18278	0.250211	0.353615	0.817413
ENSMUSG00000042903	Foxo4	10.3765	10.2896	10.5051	10.0082	10.1352	10.2605	10.3904	10.1346	-0.255778	0.0251443	0.186866
ENSMUSG00000007029	Vars	10.2873	10.4129	10.6621	10.1434	10.456	10.3467	10.4541	10.3153	-0.138757	0.264761	0.758209
ENSMUSG00000026377	Nifk	9.95603	9.71762	10.3586	9.93451	10.1826	10.2417	10.0108	10.1196	0.108838	0.582806	0.838502
ENSMUSG00000007021	Syngr3	0	0	0	0	2.74241	0	0	0.914137	0.914137	0.454692	0.817413
ENSMUSG00000086837	Gm16618	3.69543	2.8762	3.46253	3.82684	4.17597	3.45056	3.34472	3.81779	0.473068	0.562526	0.823631
ENSMUSG00000024558	Mapk4	3.83626	5.28735	4.79337	4.52256	3.75725	5.03493	4.63899	4.43824	-0.200748	0.688166	0.899397
ENSMUSG00000084333	Gm11599	4.38715	4.22943	4.14618	4.61174	4.76461	4.23868	4.25425	4.53834	0.284089	0.621902	0.862608
ENSMUSG00000089525	Gm23833	0	3.47864	3.46253	1.30194	1.71227	2.31412	2.31372	1.77611	-0.537616	0.4089	0.817413
ENSMUSG00000050600	Zfp831	0	2.26462	2.71561	0	2.14245	0	1.66008	0.714151	-0.945926	0.614188	0.858579
ENSMUSG00000083649	Rasl2-9	4.19127	2.60258	2.44757	2.4321	3.63038	4.51422	3.08047	3.52557	0.445095	0.648497	0.878248
ENSMUSG00000098176	Ccdc166	5.35226	5.13945	4.73423	6.32449	6.47013	5.60515	5.07531	6.13325	1.05794	0.00966331	0.0955772
ENSMUSG00000083642	Gm13148	1.21929	1.18169	0	0	0	1.57846	0.800329	0.526153	-0.274176	0.910396	0.975973
ENSMUSG00000083646	Gm6088	1.21929	1.82247	0	0	0	0	1.01392	0	-1.01392	0.482061	0.817413
ENSMUSG00000016255	Tubb1	3.96455	3.77445	5.39946	0	0	0	4.37949	0	-4.37949	0.000681411	0.0124318
ENSMUSG00000016256	Ctsz	12.1017	11.9147	11.9938	11.5025	11.7714	11.5719	12.0034	11.6153	-0.388102	0.000188623	0.00440892
ENSMUSG00000016257	Prelid3b	10.3041	10.129	10.1196	10.1527	10.0525	10.1714	10.1842	10.1255	-0.0586807	0.56895	0.827655
ENSMUSG00000016252	Atp5e	9.38905	9.0005	8.46784	9.2612	9.44172	9.62506	8.95246	9.44266	0.4902	0.0258413	0.190497
ENSMUSG00000016253	Nelfcd	9.69906	9.57135	9.49948	9.75038	9.81429	9.77978	9.58997	9.78148	0.191518	0.126762	0.527131
ENSMUSG00000006777	Krt23	7.34922	6.14493	4.9575	4.4275	5.93861	6.01275	6.15055	5.45962	-0.690931	0.116772	0.503439
ENSMUSG00000106332	Gm43506	2.31759	0	0	0	0	0	0.77253	0	-0.77253	0.481172	0.817413
ENSMUSG00000064023	Klk8	0	0	0	0	3.33728	0	0	1.11243	1.11243	0.398786	0.817413
ENSMUSG00000042426	Dhx29	9.33072	9.41393	9.66499	9.59775	9.56392	9.77652	9.46988	9.64606	0.176181	0.232402	0.71803
ENSMUSG00000107736	Gm44148	0	0	0	1.97497	1.09651	0	0	1.02383	1.02383	0.465231	0.817413
ENSMUSG00000084597	Gm22343	0	0	1.69041	3.29184	0	0	0.56347	1.09728	0.533809	0.575312	0.832645
ENSMUSG00000084592	Mir1898	0	1.18169	1.69041	0	0	2.31412	0.957367	0.771374	-0.185994	0.975129	0.993304
ENSMUSG00000084593	Gm22345	0	1.82247	0	0	0	0	0.607489	0	-0.607489	0.504143	0.817413
ENSMUSG00000001467	Cyp51	12.2737	12.2592	12.5353	12.1026	12.0927	11.9585	12.3561	12.0513	-0.304808	0.00261618	0.035769
ENSMUSG00000078380	Gm6096	0	0	0	1.30194	0	2.31412	0	1.20535	1.20535	0.457684	0.817413
ENSMUSG00000082996	Gm6238	0	1.18169	0	2.4321	0	2.31412	0.393897	1.58207	1.18818	0.461628	0.817413
ENSMUSG00000082990	Gm14052	0	2.26462	0	1.30194	0	0	0.754874	0.433979	-0.320894	0.749752	0.927202
ENSMUSG00000045455	Gm9797	7.69273	7.61719	7.79853	8.34384	7.76349	7.85446	7.70282	7.98726	0.284444	0.167474	0.610793
ENSMUSG00000053862	Slc51b	4.19127	0	0	0	0	0	1.39709	0	-1.39709	0.260587	0.751456
ENSMUSG00000029490	Mfsd7a	0	2.8762	4.60813	2.4321	2.4734	0	2.49478	1.63517	-0.859612	0.309924	0.804733
ENSMUSG00000022443	Myh9	11.652	11.6856	11.9716	11.6741	11.6813	11.4107	11.7697	11.5887	-0.181016	0.115389	0.49977
ENSMUSG00000107083	Gm43313	0	2.26462	0	0	2.14245	0	0.754874	0.714151	-0.0407221	0.973233	0.992535
ENSMUSG00000107085	Gm42883	0	1.18169	0	0	0	0	0.393897	0	-0.393897	0.55464	0.820333
ENSMUSG00000107086	Gm43808	4.78485	4.91523	4.23419	3.96864	4.88065	0	4.64475	2.94977	-1.69499	0.396131	0.817413
ENSMUSG00000001794	Capns1	10.8533	10.2299	9.85914	10.5982	10.5749	9.9459	10.3141	10.373	0.0588399	0.940518	0.9857
ENSMUSG00000099624	Gm7889	0	0	4.85018	0	0	0	1.61673	0	-1.61673	0.159989	0.598257
ENSMUSG00000017615	Tnfaip1	10.9611	10.964	11.2032	10.9032	10.9224	10.9379	11.0427	10.9212	-0.121577	0.213092	0.687062
ENSMUSG00000078922	Tgtp1	6.53379	7.41759	9.40547	6.73502	6.5943	6.49814	7.78562	6.60915	-1.17647	0.0459295	0.285002
ENSMUSG00000078923	Ube2v1	10.588	10.3013	10.4591	10.3075	10.3238	9.76668	10.4494	10.1327	-0.316777	0.0453224	0.282385
ENSMUSG00000078920	Ifi47	8.07319	7.92641	9.28186	8.99311	8.36628	8.62326	8.42715	8.66088	0.23373	0.79829	0.946366
ENSMUSG00000078921	Tgtp2	6.51296	7.1347	8.68249	7.5479	6.5599	6.70457	7.44339	6.93746	-0.505926	0.296285	0.794029
ENSMUSG00000010342	Tex14	3.53936	0	4.14618	0	2.4734	0	2.56185	0.824466	-1.73738	0.234121	0.720263
ENSMUSG00000036110	Slc17a2	12.9292	12.945	12.8024	11.6793	11.4792	11.2969	12.8922	11.4851	-1.40707	3.39e-36	3.22e-33
ENSMUSG00000002844	Adprh	7.57706	7.38512	7.88943	8.14157	7.98709	8.38687	7.6172	8.17184	0.554638	0.0114983	0.108036
ENSMUSG00000002845	Tmem39a	8.09438	7.9488	8.32483	8.98479	8.65816	9.19727	8.12267	8.94674	0.824067	1.05e-05	0.000388163
ENSMUSG00000015889	Lta4h	10.2421	10.6815	10.6137	10.7034	10.9567	10.8629	10.5125	10.841	0.328543	0.0168006	0.139761
ENSMUSG00000079037	Prnp	10.1009	10.2069	10.1901	10.6894	10.5856	10.604	10.166	10.6263	0.460359	1.55e-05	0.000537359
ENSMUSG00000079036	Alkbh1	8.53246	8.42406	8.23169	8.94244	7.77102	8.61597	8.39607	8.44314	0.0470775	0.645545	0.876524
ENSMUSG00000079039	Gm11037	0	0	1.0798	0	1.09651	0	0.359933	0.365505	0.00557177	0.981311	0.993964
ENSMUSG00000079038	D130040H23Rik	0	2.8762	0	2.77871	0	2.79899	0.958733	1.85923	0.9005	0.715511	0.911278
ENSMUSG00000093476	Gm22355	1.21929	1.18169	0	0	0	0	0.800329	0	-0.800329	0.50333	0.817413
ENSMUSG00000097503	3110045C21Rik	3.36433	4.22943	4.5407	5.05498	5.50451	0	4.04482	3.51983	-0.52499	0.467444	0.817413
ENSMUSG00000097501	Gm26536	0	2.26462	0	0	2.96906	5.19995	0.754874	2.723	1.96813	0.100054	0.461322
ENSMUSG00000054843	Atrnl1	10.9072	10.9155	10.9603	10.7811	10.8424	10.7559	10.9277	10.7932	-0.134521	0.152648	0.583437
ENSMUSG00000097504	4930516B21Rik	4.63865	3.47864	4.39557	5.66762	4.57092	5.1198	4.17095	5.11944	0.948493	0.11833	0.506654
ENSMUSG00000097509	B230322F03Rik	0	2.26462	4.46996	0	0	3.45056	2.24486	1.15019	-1.09467	0.481218	0.817413
ENSMUSG00000015882	Lcorl	9.82694	10.0186	9.88826	9.18333	9.34906	9.2687	9.91128	9.26703	-0.644245	3.85e-07	2.01e-05
ENSMUSG00000110649	Gm45695	2.6584	4.0198	0	3.66957	2.4734	4.63448	2.22607	3.59248	1.36642	0.446304	0.817413
ENSMUSG00000041229	Phf8	9.94441	10.1191	10.3227	10.6596	10.8593	10.8979	10.1287	10.8056	0.676845	8.93e-08	5.41e-06
ENSMUSG00000041225	Arhgap12	9.18029	9.57375	9.36949	9.26464	9.46746	9.71647	9.37451	9.48286	0.108349	0.514211	0.817413
ENSMUSG00000112736	RP23-210F14.1	1.21929	1.18169	1.0798	1.30194	1.09651	1.57846	1.16026	1.32564	0.165375	0.910165	0.975863
ENSMUSG00000041220	Elovl6	14.3066	14.7412	15.1484	14.6285	14.8334	14.7339	14.7321	14.7319	-0.000136256	0.79261	0.944348
ENSMUSG00000086670	Gm13194	5.30457	5.23972	4.73423	4.77509	5.76828	4.74549	5.09284	5.09629	0.00344829	0.873585	0.971358
ENSMUSG00000108368	Gm45053	6.70887	6.56778	7.74711	5.7485	5.1355	4.74549	7.00792	5.20983	-1.79809	5.53e-06	0.000217734
ENSMUSG00000002105	Slc39a13	7.02068	7.88056	7.99398	8.08039	8.32078	8.11439	7.63174	8.17185	0.540116	0.0511867	0.305118
ENSMUSG00000108365	Gm44951	0	2.60258	0	0	3.33728	0	0.867526	1.11243	0.244902	0.765197	0.934256
ENSMUSG00000108366	Gm5586	6.59454	6.50872	6.2618	6.49827	6.5943	6.21918	6.45502	6.43725	-0.0177684	0.974861	0.993304
ENSMUSG00000110460	Gm20786	0	1.18169	0	0	0	0	0.393897	0	-0.393897	0.55464	0.820333
ENSMUSG00000110469	Gm10358	2.93388	3.10611	2.1181	3.49303	2.4734	2.79899	2.71936	2.92181	0.202441	0.844873	0.96357
ENSMUSG00000098149	Gapdh-ps14	0	0	0	0	0	2.31412	0	0.771374	0.771374	0.469044	0.817413
ENSMUSG00000056999	Ide	12.5112	12.2374	12.5361	12.5308	12.5092	12.5941	12.4282	12.5447	0.11645	0.2855	0.783467
ENSMUSG00000022119	Rbm26	10.757	10.667	11.1462	11.1352	11.1512	10.7952	10.8567	11.0272	0.170507	0.245506	0.733822
ENSMUSG00000066319	Rtp3	10.5347	10.3582	10.9044	10.7384	10.9608	10.542	10.5991	10.7471	0.148003	0.34609	0.817413
ENSMUSG00000022110	Sucla2	11.7861	11.653	11.6994	11.7632	11.6977	11.8571	11.7128	11.7727	0.0598395	0.553497	0.820333
ENSMUSG00000022111	Uchl3	9.10572	8.90447	9.0888	8.64257	8.89046	9.19238	9.033	8.90847	-0.124533	0.472371	0.817413
ENSMUSG00000022114	Spry2	5.09627	4.64962	6.43893	4.85032	6.16147	5.48231	5.39494	5.49803	0.103091	0.989342	0.996232
ENSMUSG00000055717	Slain1	0	3.77445	0	4.69572	0	2.31412	1.25815	2.33662	1.07847	0.528391	0.820333
ENSMUSG00000098142	Gm7507	0	0	0	1.97497	0	0	0	0.658323	0.658323	0.478676	0.817413
ENSMUSG00000091905	Gm6395	8.21537	8.3076	8.25817	8.41371	8.19192	8.5099	8.26038	8.37184	0.111459	0.541662	0.820333
ENSMUSG00000040170	Fmo2	10.5527	10.9437	10.9715	11.9463	11.3449	11.6868	10.8226	11.6593	0.836694	3.05e-08	2.13e-06
ENSMUSG00000040177	2310057M21Rik	6.78035	6.06519	7.03681	6.90344	6.3744	6.979	6.62745	6.75228	0.124829	0.805057	0.948567
ENSMUSG00000040174	Alkbh3	8.82219	8.83003	8.83454	9.28512	9.15241	9.21184	8.82892	9.21646	0.387537	0.00568174	0.0647804
ENSMUSG00000051413	Plagl2	8.00769	8.1997	8.27901	7.97509	8.11107	7.96182	8.16213	8.01599	-0.146143	0.416108	0.817413
ENSMUSG00000064811	Gm22358	0	1.18169	0	1.97497	0	0	0.393897	0.658323	0.264425	0.776686	0.938311
ENSMUSG00000063849	Ppcdc	7.22663	7.01247	7.51207	7.77725	8.1229	7.61234	7.25039	7.83749	0.587104	0.0126601	0.115402
ENSMUSG00000031556	Tm2d2	10.8962	10.6363	10.4963	10.8921	10.5065	10.7984	10.6762	10.7323	0.0560923	0.708751	0.908051
ENSMUSG00000108940	Gm45719	0	2.26462	0	1.30194	0	0	0.754874	0.433979	-0.320894	0.749752	0.927202
ENSMUSG00000108942	Gm44660	0	0	0	2.4321	0	0	0	0.810701	0.810701	0.462958	0.817413
ENSMUSG00000057716	Tmem178b	0	4.0198	0	0	0	0	1.33993	0	-1.33993	0.286785	0.7842
ENSMUSG00000025465	Echs1	13.086	13.007	12.7283	13.2616	13.2611	13.1805	12.9404	13.2344	0.293974	0.00847249	0.0869305
ENSMUSG00000025464	Paox	11.0478	10.5127	10.7459	10.6036	10.6555	10.9069	10.7688	10.722	-0.0468215	0.656071	0.882565
ENSMUSG00000025466	Fuom	8.33296	8.10982	7.93611	8.40749	8.47643	8.16519	8.1263	8.34971	0.223412	0.238075	0.725651
ENSMUSG00000102049	Zbed6	10.4427	10.4513	8.41703	10.3258	9.98768	10.0001	9.77034	10.1045	0.334164	0.898186	0.975863
ENSMUSG00000109015	Gm45010	2.6584	0	1.69041	3.49303	1.71227	2.79899	1.4496	2.66809	1.21849	0.446222	0.817413
ENSMUSG00000109016	Gm44647	2.31759	0	0	1.97497	0	0	0.77253	0.658323	-0.114207	0.913989	0.9769
ENSMUSG00000052298	Cdc42se2	9.14009	9.09388	9.38158	9.27492	9.31078	9.28257	9.20518	9.28942	0.0842414	0.590591	0.84409
ENSMUSG00000039234	Sec24d	12.3699	12.7742	12.6694	12.5552	12.3537	12.5622	12.6045	12.4904	-0.114091	0.285916	0.783467
ENSMUSG00000039236	Isg20	7.62639	6.81534	7.50324	7.85237	7.39524	7.08834	7.31499	7.44532	0.130328	0.651839	0.879877
ENSMUSG00000039231	Suv39h1	8.22181	8.45568	8.30464	8.38869	7.97408	8.39541	8.32738	8.25273	-0.0746505	0.689278	0.899879
ENSMUSG00000039230	Tbcd	9.76001	9.57855	9.76071	9.71308	9.87326	9.84667	9.69975	9.811	0.111252	0.382048	0.817413
ENSMUSG00000039233	Tbce	8.93612	8.94588	8.73623	9.15394	9.03522	9.09616	8.87275	9.09511	0.22236	0.139486	0.556678
ENSMUSG00000039232	Stx11	5.30457	4.32383	5.36088	4.61174	5.43028	5.34803	4.99643	5.13001	0.133588	0.845442	0.963839
ENSMUSG00000052291	5330438D12Rik	5.6094	4.41243	4.79337	4.92181	4.70289	4.51422	4.9384	4.71298	-0.225421	0.593906	0.845689
ENSMUSG00000052293	Taf9	7.62639	6.48848	7.89619	7.27508	7.36568	7.4415	7.33702	7.36075	0.0237319	0.758329	0.93091
ENSMUSG00000039239	Tgfb2	4.85274	4.32383	4.39557	5.82509	5.54024	4.23868	4.52405	5.20134	0.67729	0.144612	0.567429
ENSMUSG00000052296	Ppp6r1	12.0434	12.0486	12.3761	12.1952	12.3172	12.2972	12.156	12.2698	0.11383	0.343723	0.817413
ENSMUSG00000095955	Gm22360	1.87053	1.82247	0	1.97497	1.71227	0	1.231	1.22908	-0.00191961	0.987819	0.995791
ENSMUSG00000067547	Gm7666	9.62576	9.38138	9.40547	9.37065	9.57903	9.68895	9.47087	9.54621	0.0753426	0.605589	0.853722
ENSMUSG00000111415	RP24-329C11.8	3.1651	4.0198	0	3.29184	3.16489	0	2.39497	2.15224	-0.242727	0.77234	0.936642
ENSMUSG00000111416	RP23-212C9.1	1.21929	0	0	0	0	0	0.406432	0	-0.406432	0.552776	0.820333
ENSMUSG00000111417	RP23-366K1.6	0	0	1.69041	0	0	0	0.56347	0	-0.56347	0.511179	0.817413
ENSMUSG00000065036	Gm22362	0	1.18169	0	0	0	0	0.393897	0	-0.393897	0.55464	0.820333
ENSMUSG00000065037	Rn7sk	9.64504	10.0044	7.76199	9.82454	9.58546	9.20214	9.13716	9.53738	0.400226	0.827237	0.957161
ENSMUSG00000065034	Gm22363	1.87053	0	0	0	0	0	0.623509	0	-0.623509	0.502529	0.817413
ENSMUSG00000060002	Chpt1	12.8096	12.6814	12.4838	13.2618	13.2688	13.5063	12.6583	13.3456	0.687343	8.71e-10	8.16e-08
ENSMUSG00000068250	Amn1	8.82642	8.94217	9.24526	8.85382	8.3762	8.6305	9.00462	8.62017	-0.384441	0.0289157	0.206292
ENSMUSG00000068252	Apol7b	2.31759	0	0	0	0	0	0.77253	0	-0.77253	0.481172	0.817413
ENSMUSG00000035936	Aldh5a1	11.1973	11.249	10.9747	11.4805	11.5782	11.5663	11.1403	11.5416	0.401289	0.000226531	0.00510644
ENSMUSG00000035934	Pknox2	4.55959	2.60258	4.67256	3.29184	4.17597	3.16125	3.94491	3.54302	-0.401888	0.492214	0.817413
ENSMUSG00000035933	Cog5	10.3191	10.3399	10.6502	10.4579	10.6173	10.4771	10.4364	10.5174	0.0810185	0.554789	0.82049
ENSMUSG00000035930	Chst4	3.83626	2.26462	2.44757	0	0	0	2.84948	0	-2.84948	0.089801	0.433279
ENSMUSG00000097889	Gm26541	0	0	2.1181	0	0	0	0.706034	0	-0.706034	0.488434	0.817413
ENSMUSG00000097887	Gm26542	0	0	3.13688	0	0	2.79899	1.04563	0.932996	-0.11263	0.879338	0.972395
ENSMUSG00000097885	5031434O11Rik	0	0	2.94157	0	2.96906	0	0.980522	0.989686	0.00916368	0.982879	0.994626
ENSMUSG00000097882	0610038B21Rik	2.6584	0	2.1181	0	0	0	1.59217	0	-1.59217	0.363618	0.817413
ENSMUSG00000091019	Gm7502	0	1.18169	0	3.05797	0	0	0.393897	1.01932	0.625425	0.548751	0.820333
ENSMUSG00000018752	Tnfsfm13	7.30143	6.26876	5.64399	6.98915	4.93535	6.01275	6.40473	5.97909	-0.425641	0.46314	0.817413
ENSMUSG00000018750	Zbtb4	10.2246	9.76045	10.1832	9.87945	9.85032	9.91357	10.0561	9.88111	-0.174962	0.158555	0.594678
ENSMUSG00000056737	Capg	6.13079	4.72075	4.9575	4.61174	4.76461	5.27589	5.26968	4.88408	-0.385598	0.349998	0.817413
ENSMUSG00000106351	Gm8896	0	1.18169	0	0	0	0	0.393897	0	-0.393897	0.55464	0.820333
ENSMUSG00000102951	Gm37216	0	3.30436	0	0	0	0	1.10145	0	-1.10145	0.415912	0.817413
ENSMUSG00000102953	Gm37019	0	1.82247	0	0	0	0	0.607489	0	-0.607489	0.504143	0.817413
ENSMUSG00000020170	Frs2	10.2262	10.2177	10.2781	9.97289	10.1101	10.1053	10.2407	10.0628	-0.177904	0.0965756	0.451846
ENSMUSG00000039908	Slc26a11	8.27845	8.04894	7.74711	7.53656	7.75591	8.46194	8.02483	7.91814	-0.106698	0.746173	0.925773
ENSMUSG00000039903	Eva1c	5.35226	3.30436	3.84448	2.4321	4.57092	0	4.16703	2.33434	-1.83269	0.286145	0.783718
ENSMUSG00000039901	9130011E15Rik	7.98517	7.63571	7.43059	8.22167	7.87262	7.93864	7.68383	8.01098	0.327152	0.151561	0.581615
ENSMUSG00000019808	Adat2	6.31055	6.62452	5.10485	6.2149	6.45148	5.96767	6.01331	6.21135	0.198044	0.838732	0.961623
ENSMUSG00000019809	Pex3	10.3518	10.3568	10.4103	10.4906	10.5222	10.6476	10.373	10.5535	0.180513	0.0910031	0.436219
ENSMUSG00000019804	Snx3	11.5931	11.4514	11.4711	11.3036	11.7868	11.7338	11.5052	11.6081	0.102884	0.369163	0.817413
ENSMUSG00000019806	Aig1	8.35068	8.55146	9.26889	8.40749	8.09314	7.92691	8.72368	8.14251	-0.581163	0.00732119	0.0783165
ENSMUSG00000019802	Sec63	12.9839	12.7955	13.2064	12.7581	12.9868	12.8604	12.9953	12.8684	-0.126828	0.224884	0.706257
ENSMUSG00000020621	Rdh14	9.34552	9.69793	9.4243	9.64076	9.62343	9.62868	9.48925	9.63096	0.141709	0.34688	0.817413
ENSMUSG00000033931	Rbm34	8.28461	8.69525	8.52566	8.00008	8.21421	8.1247	8.50184	8.11299	-0.388846	0.0299819	0.211605
ENSMUSG00000020232	Hmg20b	9.48309	9.77931	9.64104	9.62478	9.91979	9.68895	9.63448	9.74451	0.110025	0.431652	0.817413
ENSMUSG00000020231	Dip2a	7.58706	7.47014	7.41184	6.79337	7.32528	7.18997	7.48968	7.10288	-0.386804	0.125499	0.524386
ENSMUSG00000020230	Prmt2	4.19127	1.82247	4.23419	3.29184	4.26409	4.63448	3.41597	4.06347	0.647495	0.636371	0.870924
ENSMUSG00000063063	Ctnna2	0	0	0	0	2.96906	0	0	0.989686	0.989686	0.450429	0.817413
ENSMUSG00000020235	Fzr1	8.35068	8.65042	8.55586	8.23576	8.58306	8.38687	8.51898	8.4019	-0.117087	0.507202	0.817413
ENSMUSG00000020234	4930404N11Rik	2.6584	0	0	0	1.71227	0	0.886133	0.570755	-0.315377	0.764445	0.934193
ENSMUSG00000100554	Gm7690	1.87053	0	0	0	0	0	0.623509	0	-0.623509	0.502529	0.817413
ENSMUSG00000100550	2310039L15Rik	0	0	1.69041	0	0	0	0.56347	0	-0.56347	0.511179	0.817413
ENSMUSG00000054434	Tmem120b	7.60686	7.36306	7.78403	6.69477	6.95355	6.67683	7.58465	6.77505	-0.809598	0.0010869	0.0181361
ENSMUSG00000054435	Gimap4	8.34479	7.79251	8.92326	7.23353	8.15782	8.34341	8.35352	7.91159	-0.441932	0.12147	0.515274
ENSMUSG00000033429	Mcee	10.2858	10.1142	9.99603	10.5283	10.4276	10.2745	10.132	10.4101	0.278154	0.0257241	0.189836
ENSMUSG00000033427	Upb1	13.5243	13.3959	13.2636	13.4794	13.4784	13.3684	13.3946	13.4421	0.0474687	0.675222	0.893438
ENSMUSG00000096370	Gm21992	4.55959	4.91523	5.43703	5.70863	6.13834	1.57846	4.97062	4.47514	-0.495474	0.575645	0.833021
ENSMUSG00000033423	Eri3	9.65695	9.45362	9.08289	9.40537	9.76983	9.42696	9.39782	9.53405	0.13623	0.451061	0.817413
ENSMUSG00000033420	Antxr1	6.86499	6.19575	6.76862	6.18615	6.6279	6.979	6.60978	6.59768	-0.0121022	0.958611	0.99074
ENSMUSG00000101609	Kcnq1ot1	9.13328	9.04621	8.8061	8.24972	7.8656	6.83581	8.9952	7.65038	-1.34482	1.32e-06	6.13e-05
ENSMUSG00000037509	Arhgef4	3.53936	3.10611	2.71561	1.97497	4.26409	2.31412	3.12036	2.85106	-0.269301	0.92034	0.979925
ENSMUSG00000037503	Fam168b	10.8922	10.9316	11.1504	10.9131	10.8135	10.9895	10.9914	10.9054	-0.0860085	0.388283	0.817413
ENSMUSG00000104078	Gm37023	0	0	2.44757	0	0	0	0.815857	0	-0.815857	0.475452	0.817413
ENSMUSG00000104077	Gm37027	2.93388	2.26462	2.71561	0	0	0	2.63804	0	-2.63804	0.145904	0.569757
ENSMUSG00000104388	Gm37033	4.7136	4.72075	4.05245	4.21623	4.42564	2.31412	4.4956	3.652	-0.843598	0.418503	0.817413
ENSMUSG00000104389	Gm37034	1.87053	3.10611	0	2.4321	0	0	1.65888	0.810701	-0.848177	0.645185	0.87629
ENSMUSG00000095457	Gm8989	3.83626	2.8762	5.93409	3.05797	3.63038	2.79899	4.21552	3.16244	-1.05307	0.0748953	0.387881
ENSMUSG00000092364	Gm20476	3.1651	3.10611	1.69041	0	2.14245	0	2.65387	0.714151	-1.93972	0.28756	0.784248
ENSMUSG00000075705	Msrb1	13.1275	12.9482	12.7623	13.0769	13.367	13.0795	12.946	13.1745	0.228508	0.0580992	0.330961
ENSMUSG00000026176	Ctdsp1	13.0362	12.7532	12.7061	12.6235	12.7952	12.6316	12.8318	12.6834	-0.148386	0.148538	0.575417
ENSMUSG00000026177	Slc11a1	8.59822	7.82515	8.38855	7.57033	7.26249	6.64854	8.27064	7.16045	-1.11018	3.41e-05	0.0010502
ENSMUSG00000026174	Cnot9	9.50436	9.46661	9.67485	9.41469	9.49958	9.77324	9.54861	9.56251	0.0138986	0.938445	0.98516
ENSMUSG00000026175	Vil1	3.36433	1.82247	3.84448	2.77871	3.63038	0	3.01043	2.13636	-0.874064	0.703547	0.905363
ENSMUSG00000071604	Fam189a2	5.7226	4.85327	5.61149	5.23419	5.50451	2.79899	5.39579	4.51256	-0.883222	0.392666	0.817413
ENSMUSG00000026173	Plcd4	1.21929	2.26462	0	0	2.96906	0	1.16131	0.989686	-0.171619	0.87073	0.970828
ENSMUSG00000026170	Cyp27a1	14.5695	14.6124	14.4681	14.2552	14.2455	14.3215	14.55	14.2741	-0.275945	0.00144067	0.0224804
ENSMUSG00000026171	Rnf25	8.85567	8.78095	8.17165	8.32418	8.47182	8.34341	8.60276	8.3798	-0.222957	0.206032	0.677196
ENSMUSG00000026179	Pnkd	11.036	11.0398	10.7089	11.0806	11.6637	11.4306	10.9283	11.3916	0.46336	0.00118804	0.0193712
ENSMUSG00000026956	Uap1l1	5.68584	6.2205	7.17665	6.29786	6.78508	7.08834	6.361	6.72376	0.362764	0.513298	0.817413
ENSMUSG00000074232	Gm10647	0	0	2.94157	0	0	0	0.980522	0	-0.980522	0.461103	0.817413
ENSMUSG00000074547	Rps8-ps4	3.69543	4.12842	3.95221	3.82684	3.98175	3.89778	3.92535	3.90212	-0.0232307	0.960539	0.990824
ENSMUSG00000060878	Olfr1420	0	0	1.69041	0	1.71227	0	0.56347	0.570755	0.0072851	0.985118	0.99535
ENSMUSG00000105383	Gm42641	7.56699	8.34748	8.86931	8.00831	5.9912	7.93864	8.26126	7.31272	-0.948541	0.238696	0.726191
ENSMUSG00000105382	Gm43339	3.53936	0	3.95221	0	0	0	2.49719	0	-2.49719	0.109166	0.484478
ENSMUSG00000038742	Angptl6	7.70196	7.28307	7.40237	6.37632	6.99276	6.8105	7.46247	6.72653	-0.735941	0.00669087	0.0729739
ENSMUSG00000038740	Mvb12b	6.74505	7.1347	7.41184	6.98915	6.69284	7.30318	7.0972	6.99506	-0.10214	0.661427	0.886214
ENSMUSG00000038745	Nlrp6	11.5668	11.6817	11.428	11.746	11.9963	10.7691	11.5588	11.5038	-0.0549884	0.941882	0.986052
ENSMUSG00000042826	Fgf11	3.83626	3.10611	3.46253	2.77871	3.63038	4.51422	3.4683	3.6411	0.172804	0.73518	0.921747
ENSMUSG00000095042	Gm12537	8.82642	8.63208	8.63074	8.79315	8.84832	8.85754	8.69641	8.833	0.136588	0.388891	0.817413
ENSMUSG00000042821	Snai1	5.6094	4.97463	4.14618	4.52256	4.63841	2.79899	4.91007	3.98665	-0.923416	0.225134	0.706654
ENSMUSG00000042828	Trim72	3.36433	0	0	0	0	0	1.12144	0	-1.12144	0.407844	0.817413
ENSMUSG00000104923	Gm5865	3.53936	3.10611	2.1181	2.77871	0	4.07827	2.92119	2.28566	-0.635529	0.978263	0.993474
ENSMUSG00000104926	Mir6947	1.21929	1.18169	1.0798	0	0	1.57846	1.16026	0.526153	-0.634109	0.785645	0.941328
ENSMUSG00000104927	Gm43388	2.31759	0	0	0	0	0	0.77253	0	-0.77253	0.481172	0.817413
ENSMUSG00000104925	Gm43061	2.93388	0	0	0	0	0	0.977961	0	-0.977961	0.46166	0.817413
ENSMUSG00000005952	Trpv1	0	0	0	0	3.98175	0	0	1.32725	1.32725	0.27953	0.776149
ENSMUSG00000005951	Shpk	10.7778	10.8387	10.7337	10.9348	11.1176	11.2541	10.7834	11.1022	0.318781	0.00393877	0.0488729
ENSMUSG00000043192	Gm1840	5.9254	6.69686	5.79632	6.00047	6.01679	7.08834	6.13953	6.36853	0.229001	0.542498	0.820333
ENSMUSG00000076372	Mir568	1.21929	1.18169	1.0798	1.30194	1.09651	1.57846	1.16026	1.32564	0.165375	0.910165	0.975863
ENSMUSG00000049760	2410015M20Rik	9.96373	9.51744	9.05899	9.60862	9.96321	9.41021	9.51338	9.66068	0.147295	0.554606	0.820333
ENSMUSG00000105033	Gm43423	1.21929	0	0	4.69572	0	0	0.406432	1.56524	1.15881	0.198832	0.665227
ENSMUSG00000105031	Gm3511	2.6584	2.60258	2.1181	1.97497	1.09651	1.57846	2.45969	1.54998	-0.909712	0.498116	0.817413
ENSMUSG00000026825	Dnm1	2.31759	2.8762	0	0	0	0	1.73126	0	-1.73126	0.317162	0.812998
ENSMUSG00000026827	Gpd2	10.9859	11.3443	11.5085	11.547	11.5043	11.8004	11.2796	11.6173	0.337697	0.0167456	0.139506
ENSMUSG00000026820	Ptges2	9.78194	9.7456	9.85221	10.1377	10.0771	10.1739	9.79325	10.1296	0.336307	0.00313079	0.0411321
ENSMUSG00000026821	Ralgds	6.10318	6.17056	6.8264	6.06505	6.45148	5.41673	6.36671	5.97775	-0.388958	0.350804	0.817413
ENSMUSG00000035215	Lsm7	6.33449	6.84748	6.01085	6.90344	7.13976	6.90918	6.39761	6.98413	0.586518	0.0746624	0.387377
ENSMUSG00000026829	Gbgt1	3.69543	3.77445	3.95221	0	0	2.31412	3.80736	0.771374	-3.03599	0.0408666	0.263306
ENSMUSG00000061666	Gdpd1	5.48655	5.33347	5.36088	4.09774	6.11484	5.71834	5.39363	5.31031	-0.0833263	0.785473	0.941328
ENSMUSG00000046341	Gm11223	2.93388	3.90233	2.44757	1.97497	3.16489	1.57846	3.0946	2.23944	-0.855158	0.475858	0.817413
ENSMUSG00000029287	Tgfbr3	9.08822	8.75153	9.08289	9.09716	8.91108	9.14254	8.97422	9.05026	0.076041	0.677102	0.89461
ENSMUSG00000059835	Rpl13-ps3	5.64813	5.23972	5.00831	5.58193	5.18149	5.03493	5.29872	5.26611	-0.0326039	0.941563	0.985898
ENSMUSG00000045690	Wdr89	8.75281	8.16824	8.78075	8.81209	8.52628	8.50201	8.56727	8.61346	0.0461946	0.896941	0.975863
ENSMUSG00000045691	Thtpa	9.12987	9.34807	9.2266	8.968	7.99355	9.34119	9.23485	8.76758	-0.467268	0.114191	0.496087
ENSMUSG00000045694	Gm4997	0	0	0	0	0	2.31412	0	0.771374	0.771374	0.469044	0.817413
ENSMUSG00000028468	Rgp1	10.9012	10.8287	10.7617	11.1314	10.9625	11.124	10.8305	11.0727	0.242119	0.0210382	0.164085
ENSMUSG00000028469	Npr2	10.5514	10.54	10.2871	10.5567	10.7006	10.6776	10.4595	10.645	0.185442	0.124251	0.521646
ENSMUSG00000028466	Creb3	10.3415	10.1835	10.2467	10.1545	10.4618	10.2906	10.2572	10.3023	0.0450843	0.691927	0.901038
ENSMUSG00000028464	Tpm2	7.0499	6.52868	7.14294	6.52148	6.01679	6.49814	6.90717	6.34547	-0.561705	0.0615455	0.343825
ENSMUSG00000028465	Tln1	11.5114	11.3478	11.4745	11.5688	11.4659	11.4624	11.4446	11.499	0.0544745	0.597831	0.848451
ENSMUSG00000028463	Car9	0	0	2.94157	0	2.14245	0	0.980522	0.714151	-0.266371	0.782167	0.940576
ENSMUSG00000028460	Sit1	0	0	2.1181	0	0	0	0.706034	0	-0.706034	0.488434	0.817413
ENSMUSG00000028461	Ccdc107	9.80569	9.21583	9.38399	8.83542	9.34906	9.11179	9.4685	9.09876	-0.369747	0.0351985	0.237747
ENSMUSG00000102564	Gm37035	0	1.18169	5.70687	0	2.4734	3.16125	2.29619	1.87822	-0.417971	0.208806	0.681311
ENSMUSG00000048410	Zfp407	8.27227	8.08981	7.38325	8.62661	8.4248	6.36539	7.91511	7.8056	-0.109511	0.843241	0.963275
ENSMUSG00000043445	Pgp	9.31275	9.18158	9.10348	9.29525	9.23377	8.99307	9.19927	9.17403	-0.02524	0.884705	0.973703
ENSMUSG00000088015	Mir1932	2.31759	0	0	0	0	0	0.77253	0	-0.77253	0.481172	0.817413
ENSMUSG00000088106	Gm22378	1.87053	2.8762	1.69041	0	1.09651	0	2.14571	0.365505	-1.78021	0.307565	0.803297
ENSMUSG00000048416	Mlf1	2.93388	0	0	0	0	0	0.977961	0	-0.977961	0.46166	0.817413
ENSMUSG00000043448	Gjc2	4.08236	4.32383	4.85018	4.77509	5.35202	5.34803	4.41879	5.15838	0.739591	0.190961	0.651645
ENSMUSG00000006360	Crip1	2.31759	4.41243	5.00831	3.05797	4.08213	4.23868	3.91278	3.79292	-0.119851	0.606395	0.854251
ENSMUSG00000006362	Cbfa2t3	8.75725	8.3362	8.23169	7.93245	8.0191	7.53718	8.44171	7.82957	-0.612134	0.00392793	0.0488002
ENSMUSG00000006369	Fbln1	6.04632	3.30436	0	6.52148	6.20664	5.96767	3.11689	6.23193	3.11504	0.346576	0.817413
ENSMUSG00000042312	S100a13	9.44511	8.90829	8.54729	8.40125	8.82678	8.57146	8.9669	8.59983	-0.367065	0.0591118	0.33506
ENSMUSG00000031004	Mki67	7.36093	6.42601	7.58919	6.93834	6.81456	6.43329	7.12538	6.72873	-0.396646	0.153066	0.584294
ENSMUSG00000044876	Zfp444	8.27227	8.24866	7.96854	8.31093	8.11107	8.26173	8.16316	8.22791	0.0647518	0.763547	0.933568
ENSMUSG00000039095	En2	2.31759	0	0	0	0	0	0.77253	0	-0.77253	0.481172	0.817413
ENSMUSG00000109842	Gm45502	0	0	0	2.4321	0	0	0	0.810701	0.810701	0.462958	0.817413
ENSMUSG00000048216	Gpr85	0	0	1.69041	0	0	0	0.56347	0	-0.56347	0.511179	0.817413
ENSMUSG00000086801	Gm15943	0	3.77445	0	0	2.4734	3.45056	1.25815	1.97465	0.716503	0.938307	0.985061
ENSMUSG00000032293	Ireb2	11.6786	11.8557	11.776	11.7243	11.5814	11.7288	11.7701	11.6782	-0.0919496	0.323436	0.817413
ENSMUSG00000032290	Ptpn9	9.99786	10.372	10.4636	10.7883	10.7085	10.5966	10.2778	10.6978	0.419962	0.002258	0.032013
ENSMUSG00000032294	Pkm	8.75281	7.88056	8.09145	8.00831	8.01275	8.05097	8.24161	8.02401	-0.217595	0.238782	0.726356
ENSMUSG00000032295	Man2c1	9.41173	9.22504	9.24526	9.33181	9.34149	9.39326	9.29401	9.35552	0.0615094	0.674998	0.893328
ENSMUSG00000081996	Gm7153	0	1.82247	0	1.30194	2.4734	3.16125	0.607489	2.31219	1.70471	0.331311	0.817413
ENSMUSG00000081995	Gm11719	1.87053	0	0	0	0	0	0.623509	0	-0.623509	0.502529	0.817413
ENSMUSG00000044258	Ctla2a	6.31055	4.72075	6.96145	6.37632	5.0389	3.69143	5.99758	5.03555	-0.962035	0.166632	0.608986
ENSMUSG00000081992	Gm13408	6.15788	5.98078	5.73731	6.29786	6.5772	5.54503	5.95865	6.14003	0.181379	0.511681	0.817413
ENSMUSG00000044252	Osbpl1a	12.0348	12.3999	12.0311	12.2242	12.1032	12.2085	12.1553	12.1786	0.0233581	0.942725	0.986497
ENSMUSG00000044250	Pced1b	5.48655	5.37815	5.32124	5.7485	5.50451	5.41673	5.39531	5.55658	0.161266	0.693969	0.90137
ENSMUSG00000081999	Gm13461	7.61665	7.32932	7.65445	7.40551	7.77102	7.65562	7.53347	7.61072	0.0772456	0.733742	0.921021
ENSMUSG00000081998	Gm13245	2.6584	1.82247	0	3.29184	1.09651	0	1.49362	1.46278	-0.0308376	0.867028	0.970054
ENSMUSG00000014551	Mrps25	8.72591	7.93391	9.15231	9.34487	9.47441	8.14509	8.60404	8.98812	0.38408	0.421439	0.817413
ENSMUSG00000058355	Abce1	11.8751	11.9419	12.1936	12.0754	11.9485	11.9736	12.0035	11.9991	-0.00438068	0.898121	0.975863
ENSMUSG00000058351	Smim4	6.8975	6.33826	6.4014	6.56679	6.95355	6.88514	6.54572	6.80182	0.256104	0.419023	0.817413
ENSMUSG00000050122	Vwa3b	5.09627	5.50446	3.72805	0	2.4734	0	4.77626	0.824466	-3.95179	0.000721072	0.01301
ENSMUSG00000086418	Gm13362	0	0	0	1.30194	0	0	0	0.433979	0.433979	0.518877	0.817413
ENSMUSG00000101249	Gm29216	16.773	16.9845	16.6958	16.9695	16.8391	16.8797	16.8178	16.8961	0.078336	0.519134	0.817484
ENSMUSG00000086410	Gm16158	0	0	2.71561	0	0	1.57846	0.905204	0.526153	-0.37905	0.702984	0.905274
ENSMUSG00000086417	Gm12996	2.6584	0	2.71561	3.49303	0	0	1.79134	1.16434	-0.626993	0.973185	0.992535
ENSMUSG00000034639	Setmar	7.00584	7.54063	7.34423	6.73502	7.25176	7.55253	7.2969	7.17977	-0.117134	0.691952	0.901038
ENSMUSG00000059409	Ppp2r5d	10.8081	10.6591	10.9408	10.4291	10.5178	10.6132	10.8027	10.52	-0.282647	0.00925963	0.0927089
ENSMUSG00000059406	Tmprss9	0	0	2.71561	0	0	0	0.905204	0	-0.905204	0.467025	0.817413
ENSMUSG00000059401	Mamld1	5.5696	5.46357	3.95221	4.61174	5.60916	5.77177	4.99513	5.33089	0.335762	0.64863	0.878248
ENSMUSG00000082711	Gm12987	0	3.10611	0	0	0	0	1.03537	0	-1.03537	0.452683	0.817413
ENSMUSG00000088219	Gm22077	1.21929	0	1.0798	1.30194	0	1.57846	0.766365	0.960132	0.193768	0.894836	0.975863
ENSMUSG00000041757	Plekha6	11.3549	11.0528	10.9342	11.0845	11.1338	11.0298	11.114	11.0827	-0.031254	0.712536	0.909805
ENSMUSG00000087312	Gm13833	1.87053	3.30436	0	0	0	0	1.72496	0	-1.72496	0.292089	0.78819
ENSMUSG00000041750	Cd1d2	0	0	0	0	5.76828	0	0	1.92276	1.92276	0.430117	0.817413
ENSMUSG00000047759	Hs3st3a1	6.61424	6.98384	6.72372	7.41793	7.27315	7.26642	6.77393	7.31917	0.545235	0.0356231	0.239372
ENSMUSG00000047757	Fancb	2.93388	3.47864	0	4.09774	3.63038	0	2.13751	2.57604	0.438533	0.619974	0.861329
ENSMUSG00000027708	Dcun1d1	10.8272	10.9003	10.9595	11.0845	11.0649	11.1595	10.8957	11.103	0.207337	0.03761	0.248415
ENSMUSG00000027709	Mccc1	10.47	10.4963	10.553	10.8342	10.8942	10.8614	10.5064	10.8633	0.356845	0.000313638	0.00667329
ENSMUSG00000027706	Sec62	14.2318	14.3683	14.393	14.4696	14.2776	14.2512	14.331	14.3328	0.00176466	0.997383	0.999
ENSMUSG00000051652	Lrrc3	11.269	11.3804	10.9595	11.121	11.2737	10.9306	11.203	11.1084	-0.0945233	0.442585	0.817413
ENSMUSG00000027702	Lrrc34	3.36433	0	0	0	0	0	1.12144	0	-1.12144	0.407844	0.817413
ENSMUSG00000056602	Fry	6.04632	5.65732	5.96014	6.45072	6.35446	6.73179	5.88792	6.51233	0.624402	0.0667062	0.360242
ENSMUSG00000000976	Heatr6	8.97091	8.88912	8.90327	8.98479	9.00996	8.85134	8.9211	8.9487	0.0275986	0.843277	0.963275
ENSMUSG00000057554	Lgals8	11.3231	11.7152	11.7497	11.7711	11.7453	11.671	11.596	11.7291	0.133147	0.329463	0.817413
ENSMUSG00000057551	Zfp317	8.12216	9.07364	8.82748	8.70976	9.13499	8.78792	8.67443	8.87755	0.203128	0.469143	0.817413
ENSMUSG00000004270	Lpcat3	12.9713	12.8298	12.6619	12.9459	12.9193	13.0699	12.821	12.9784	0.157332	0.149389	0.57712
ENSMUSG00000040405	Havcr1	0	0	0	0	2.14245	0	0	0.714151	0.714151	0.470548	0.817413
ENSMUSG00000080717	B230307C23Rik	2.93388	3.30436	2.1181	3.96864	5.0389	2.79899	2.78545	3.93551	1.15006	0.131307	0.537838
ENSMUSG00000080715	Gm5406	2.31759	1.82247	0	4.09774	1.09651	2.79899	1.38002	2.66442	1.2844	0.291703	0.787845
ENSMUSG00000080712	Hist3h2bb-ps	0	0	0	0	1.71227	0	0	0.570755	0.570755	0.488149	0.817413
ENSMUSG00000085298	F730035M05Rik	0	0	0	0	2.96906	0	0	0.989686	0.989686	0.450429	0.817413
ENSMUSG00000082417	Gm13740	1.87053	2.60258	2.1181	2.4321	2.74241	2.31412	2.19707	2.49621	0.299143	0.812334	0.950687
ENSMUSG00000098694	Gm27506	0	0	1.0798	0	0	0	0.359933	0	-0.359933	0.563571	0.823631
ENSMUSG00000098695	Gm27618	1.21929	1.18169	1.0798	2.77871	2.74241	1.57846	1.16026	2.36653	1.20626	0.343955	0.817413
ENSMUSG00000098692	Gm28041	1.87053	0	0	0	2.96906	1.57846	0.623509	1.51584	0.892331	0.564919	0.824652
ENSMUSG00000046806	3110062M04Rik	5.25524	7.17325	4.85018	7.24751	7.96096	7.30318	5.75956	7.50389	1.74433	0.0663792	0.359407
ENSMUSG00000046807	Lrrc75b	0	3.63411	4.14618	4.69572	3.87386	4.23868	2.59343	4.26942	1.67599	0.320096	0.815331
ENSMUSG00000082419	Gm11425	4.38715	4.0198	4.05245	3.82684	4.42564	4.23868	4.15313	4.16372	0.0105867	0.972911	0.992535
ENSMUSG00000089775	Gm16270	0	0	0	0	0	3.45056	0	1.15019	1.15019	0.382555	0.817413
ENSMUSG00000089774	Slc5a3	8.72591	8.10982	8.41232	8.08818	7.49876	7.77818	8.41602	7.78837	-0.627644	0.00416801	0.0510615
ENSMUSG00000003721	Insig2	12.3145	12.0373	11.8287	12.0847	12.3262	12.7747	12.0602	12.3952	0.334995	0.0288508	0.206038
ENSMUSG00000015937	H2afy	11.6908	11.6889	11.7581	11.7256	11.6371	11.7736	11.7126	11.7121	-0.000479454	0.959773	0.990763
ENSMUSG00000015932	Dstn	12.4631	12.5195	12.3609	12.1283	12.1455	12.0899	12.4478	12.1212	-0.326584	0.00025017	0.00553084
ENSMUSG00000007613	Tgfbr1	10.4928	10.5486	11.0555	10.193	10.3593	10.3267	10.6989	10.293	-0.40594	0.00294141	0.0391846
ENSMUSG00000007610	Gtpbp3	7.7825	7.82515	7.89619	7.90624	8.26314	7.58274	7.83462	7.91738	0.0827609	0.596184	0.847296
ENSMUSG00000007617	Homer1	8.81795	9.19413	8.87274	9.03402	8.93811	8.80083	8.96161	8.92432	-0.0372864	0.77599	0.938311
ENSMUSG00000098037	Gm7765	0	1.82247	0	0	0	0	0.607489	0	-0.607489	0.504143	0.817413
ENSMUSG00000098039	Gm26925	2.93388	0	0	0	0	0	0.977961	0	-0.977961	0.46166	0.817413
ENSMUSG00000065544	Mir32	0	1.18169	0	0	1.71227	0	0.393897	0.570755	0.176858	0.830449	0.958953
ENSMUSG00000009545	Kcnq1	6.07503	4.57481	6.2193	6.18615	5.64242	6.61969	5.62305	6.14942	0.526372	0.37739	0.817413
ENSMUSG00000065540	Mir126a	1.21929	0	0	0	1.09651	1.57846	0.406432	0.891658	0.485227	0.774375	0.937583
ENSMUSG00000009549	Srp14	9.53568	9.63487	9.32258	9.93882	9.23649	9.02092	9.49771	9.39875	-0.0989649	0.800354	0.946701
ENSMUSG00000065548	Mir29c	1.21929	0	0	1.30194	0	0	0.406432	0.433979	0.0275474	0.966573	0.991642
ENSMUSG00000081144	Vmn2r-ps2	0	0	0	0	2.14245	0	0	0.714151	0.714151	0.470548	0.817413
ENSMUSG00000081143	Gm15823	4.85274	1.82247	2.44757	3.05797	3.87386	0	3.04093	2.31061	-0.730317	0.593446	0.845641
ENSMUSG00000085873	Ttc39aos1	0	2.60258	0	0	1.71227	0	0.867526	0.570755	-0.296771	0.774791	0.937583
ENSMUSG00000094557	Rpl35a-ps7	1.21929	1.18169	1.0798	1.30194	1.09651	1.57846	1.16026	1.32564	0.165375	0.910165	0.975863
ENSMUSG00000094551	Gm22392	0	2.60258	2.71561	0	0	0	1.77273	0	-1.77273	0.30772	0.803297
ENSMUSG00000073491	Ifi213	5.39843	3.77445	5.93409	4.92181	4.50011	3.45056	5.03566	4.29083	-0.744828	0.184689	0.642929
ENSMUSG00000106659	Gm43095	0	1.18169	0	0	1.71227	0	0.393897	0.570755	0.176858	0.830449	0.958953
ENSMUSG00000073490	Ifi207	8.47437	8.06952	9.01308	7.75784	7.77852	8.54101	8.51899	8.02579	-0.493198	0.0468758	0.288758
ENSMUSG00000083439	Gm14491	0	0	0	1.30194	0	0	0	0.433979	0.433979	0.518877	0.817413
ENSMUSG00000091313	Fth-ps2	2.93388	2.26462	0	2.77871	0	0	1.73283	0.926237	-0.806598	0.739467	0.92399
ENSMUSG00000093784	Gm22394	1.21929	1.18169	0	1.30194	0	0	0.800329	0.433979	-0.36635	0.847426	0.964077
ENSMUSG00000093782	Gm22396	1.21929	1.18169	1.0798	1.30194	1.09651	1.57846	1.16026	1.32564	0.165375	0.910165	0.975863
ENSMUSG00000108540	Gm4768	0	0	1.69041	0	0	0	0.56347	0	-0.56347	0.511179	0.817413
ENSMUSG00000108543	Gm44735	0	0	0	0	1.71227	0	0	0.570755	0.570755	0.488149	0.817413
ENSMUSG00000108547	Gm45186	1.21929	0	0	2.77871	2.96906	3.45056	0.406432	3.06611	2.65968	0.0929239	0.441679
ENSMUSG00000045867	Cradd	8.33889	8.42938	8.38374	8.14904	8.58306	8.65914	8.384	8.46375	0.0797436	0.624702	0.864615
ENSMUSG00000099127	Gm27320	1.21929	0	1.69041	0	0	0	0.969902	0	-0.969902	0.485845	0.817413
ENSMUSG00000099125	Gm27322	1.21929	1.18169	1.0798	1.30194	1.09651	1.57846	1.16026	1.32564	0.165375	0.910165	0.975863
ENSMUSG00000045868	Gvin1	9.18688	9.2523	12.0223	8.98896	8.53517	8.15518	10.1538	8.55977	-1.59405	0.0267018	0.195163
ENSMUSG00000111594	RP23-468H22.7	3.36433	0	4.05245	2.4321	4.08213	0	2.47226	2.17141	-0.300852	0.863118	0.968371
ENSMUSG00000067942	Zfp160	7.8169	8.11643	8.30464	7.82465	7.15136	7.98463	8.07933	7.65355	-0.425781	0.0886932	0.430573
ENSMUSG00000095200	Ighv1-7	2.31759	0	0	0	0	0	0.77253	0	-0.77253	0.481172	0.817413
ENSMUSG00000095204	Ighv1-52	0	1.82247	0	0	0	0	0.607489	0	-0.607489	0.504143	0.817413
ENSMUSG00000021631	Mrps36-ps1	3.53936	1.82247	3.60139	4.61174	4.42564	4.38302	2.98774	4.47347	1.48573	0.100721	0.462812
ENSMUSG00000096579	Gm17121	2.93388	2.60258	2.44757	3.66957	3.63038	2.31412	2.66134	3.20469	0.543345	0.505699	0.817413
ENSMUSG00000109638	Gm45630	0	3.30436	0	0	0	0	1.10145	0	-1.10145	0.415912	0.817413
ENSMUSG00000003549	Ercc1	6.23623	6.799	6.73884	6.58892	6.54239	7.24769	6.59136	6.793	0.201641	0.529788	0.820333
ENSMUSG00000017421	Zfp207	9.96564	10.0621	10.3985	10.3142	10.4048	10.3793	10.1421	10.3661	0.224039	0.107353	0.48052
ENSMUSG00000017428	Psmd11	12.3395	12.2382	12.1434	12.3096	12.4396	12.3298	12.2403	12.3597	0.119321	0.225769	0.708065
ENSMUSG00000107296	Gm43500	0	2.60258	0	3.05797	3.98175	2.79899	0.867526	3.27957	2.41204	0.166196	0.608595
ENSMUSG00000037742	Eef1a1	16.7482	16.8381	16.6905	16.7305	16.759	16.6356	16.7589	16.7084	-0.0505564	0.557987	0.823296
ENSMUSG00000037740	Mrps26	8.77485	8.67301	8.29444	8.79315	8.80124	8.9761	8.58077	8.85683	0.276059	0.134593	0.545242
ENSMUSG00000003541	Ier3	5.98713	4.57481	5.50937	5.23419	4.63841	4.94475	5.3571	4.93912	-0.417984	0.32257	0.816514
ENSMUSG00000099876	Gm29650	1.21929	2.60258	3.95221	4.61174	4.63841	5.34803	2.59136	4.86606	2.2747	0.0185049	0.149773
ENSMUSG00000099871	Gm21742	2.93388	0	0	0	0	0	0.977961	0	-0.977961	0.46166	0.817413
ENSMUSG00000032584	Mst1r	3.96455	3.77445	0	0	0	2.79899	2.57966	0.932996	-1.64667	0.277226	0.773513
ENSMUSG00000101191	Gm28809	1.87053	0	0	0	0	0	0.623509	0	-0.623509	0.502529	0.817413
ENSMUSG00000032580	Rbm5	9.95988	10.3707	9.99446	11.0279	10.2147	9.85907	10.1083	10.3672	0.2589	0.382204	0.817413
ENSMUSG00000079179	Rab10os	7.16119	6.78247	7.29392	7.17621	6.75498	6.8105	7.0792	6.9139	-0.165298	0.527373	0.820333
ENSMUSG00000074780	Anapc15-ps	3.36433	0	1.0798	0	0	2.79899	1.48138	0.932996	-0.548382	0.736007	0.922274
ENSMUSG00000015488	Cacfd1	9.28537	9.21583	9.87634	9.61133	9.401	9.66797	9.45918	9.5601	0.100916	0.695912	0.902181
ENSMUSG00000070476	Fam217b	3.96455	4.78853	5.28048	4.61174	4.63841	5.03493	4.67785	4.76169	0.0838395	0.975526	0.993304
ENSMUSG00000019689	Fmc1	9.229	9.27019	9.02238	9.10869	9.21731	9.06439	9.17386	9.13013	-0.0437255	0.741708	0.924339
ENSMUSG00000083372	Gm11235	0	2.26462	0	0	1.71227	0	0.754874	0.570755	-0.184118	0.861285	0.967874
ENSMUSG00000025408	Ddit3	6.21059	6.14493	5.54422	6.37632	6.22871	6.05647	5.96658	6.2205	0.253919	0.515648	0.817413
ENSMUSG00000045055	Rpsa-ps2	6.99086	6.76575	6.8264	6.77418	6.5772	6.36539	6.861	6.57226	-0.288741	0.323848	0.817413
ENSMUSG00000111187	RP23-386F15.2	5.09627	6.26876	6.2618	4.61174	5.46787	4.84855	5.87561	4.97605	-0.899558	0.0499472	0.299741
ENSMUSG00000111184	RP23-359B23.13	3.1651	5.03169	5.1508	3.82684	4.98805	5.60515	4.4492	4.80668	0.357481	0.684423	0.89754
ENSMUSG00000039585	Myo9a	8.69387	8.26064	8.42172	8.00008	7.30465	7.15018	8.45875	7.48497	-0.973776	8.33e-05	0.00221054
ENSMUSG00000061607	Mdc1	8.33889	8.28431	8.44957	8.61587	8.56583	8.36964	8.35759	8.51711	0.159523	0.335896	0.817413
ENSMUSG00000112563	RP23-383C2.10	0	1.82247	0	0	0	0	0.607489	0	-0.607489	0.504143	0.817413
ENSMUSG00000000561	Wdr77	8.54277	9.50742	8.61032	9.27492	9.79593	9.68199	8.88684	9.58428	0.697444	0.00467317	0.0559019
ENSMUSG00000000563	Atp5f1	13.1638	13.3709	13.2874	13.3099	13.3159	13.0904	13.274	13.2387	-0.0353238	0.708851	0.908051
ENSMUSG00000000562	Adora3	0	0	3.13688	0	3.75725	0	1.04563	1.25242	0.20679	0.777246	0.938459
ENSMUSG00000050244	Heatr1	9.51225	9.58333	9.70597	9.76017	9.8924	9.78953	9.60051	9.81403	0.213516	0.0874848	0.42733
ENSMUSG00000000567	Sox9	8.47437	8.97527	9.18856	9.47536	9.63381	8.91803	8.8794	9.3424	0.463002	0.023573	0.178655
ENSMUSG00000050248	Evc2	5.52867	5.23972	5.50937	5.82509	6.16147	5.60515	5.42592	5.8639	0.437982	0.258524	0.750372
ENSMUSG00000061603	Akap6	0	0	0	2.4321	3.98175	0	0	2.13795	2.13795	0.151945	0.582168
ENSMUSG00000062235	Gm5341	0	0	0	0	1.09651	0	0	0.365505	0.365505	0.530725	0.820333
ENSMUSG00000062234	Gak	11.3607	11.3694	11.4574	11.2342	11.4484	11.3172	11.3959	11.3333	-0.0625709	0.51709	0.817413
ENSMUSG00000062232	Rapgef2	10.0638	10.0362	9.23729	9.78435	9.51986	9.6785	9.77909	9.6609	-0.118185	0.377352	0.817413
ENSMUSG00000031378	Abcd1	9.93269	9.83847	9.85914	10.3918	10.2271	10.1788	9.87677	10.2659	0.389131	0.00077678	0.0137866
ENSMUSG00000031379	Pir	9.45333	9.35926	9.37917	9.30531	9.14082	9.33233	9.39725	9.25949	-0.137767	0.28213	0.779395
ENSMUSG00000041417	Pik3r1	11.4283	11.6501	11.4402	12.0512	12.0673	12.3951	11.5062	12.1712	0.664977	2.06e-08	1.49e-06
ENSMUSG00000041415	Dicer1	10.8952	11.111	11.0898	11.236	11.1316	11.2774	11.032	11.215	0.182974	0.0941239	0.444941
ENSMUSG00000031370	Zrsr2	7.82538	7.53077	8.11483	7.65669	7.83715	7.71138	7.82366	7.73507	-0.088584	0.617346	0.859996
ENSMUSG00000031371	Haus7	8.20891	8.14257	8.10319	8.14157	8.3762	8.5099	8.15156	8.34256	0.190999	0.287811	0.784248
ENSMUSG00000031373	Car5b	6.42648	7.10842	6.99962	7.20516	6.6279	6.29414	6.84484	6.70907	-0.135777	0.721818	0.915082
ENSMUSG00000031375	Bgn	10.8952	11.0852	10.7792	10.5297	10.9275	10.9495	10.9199	10.8023	-0.117603	0.383301	0.817413
ENSMUSG00000031377	Bmx	0	2.26462	3.95221	0	0	0	2.07228	0	-2.07228	0.180645	0.635265
ENSMUSG00000110589	Gm45754	1.87053	1.82247	3.46253	1.30194	2.4734	2.31412	2.38518	2.02982	-0.355357	0.692949	0.901241
ENSMUSG00000093208	Gm27325	1.21929	1.18169	1.0798	1.30194	1.09651	1.57846	1.16026	1.32564	0.165375	0.910165	0.975863
ENSMUSG00000110586	4930578M07Rik	0	3.10611	0	0	0	0	1.03537	0	-1.03537	0.452683	0.817413
ENSMUSG00000105639	Gm42516	0	1.18169	0	0	0	0	0.393897	0	-0.393897	0.55464	0.820333
ENSMUSG00000110580	Gm45707	3.53936	2.8762	0	0	2.96906	0	2.13852	0.989686	-1.14883	0.557575	0.82281
ENSMUSG00000110637	Gm7807	3.1651	2.8762	2.94157	1.97497	1.71227	0	2.99429	1.22908	-1.76521	0.247488	0.736664
ENSMUSG00000110635	Gm45853	3.96455	4.12842	0	1.30194	0	0	2.69766	0.433979	-2.26368	0.0976218	0.453953
ENSMUSG00000110631	Gm45836	7.93907	7.654	7.19869	8.37602	7.0924	7.61234	7.59725	7.69359	0.0963327	0.601606	0.850823
ENSMUSG00000110630	K230015D01Rik	4.29253	4.0198	5.39946	5.11723	4.8238	4.38302	4.5706	4.77468	0.204084	0.861778	0.968135
ENSMUSG00000103547	Gm37665	0	0	0	0	0	1.57846	0	0.526153	0.526153	0.506163	0.817413
ENSMUSG00000110639	Gm6831	2.93388	0	0	0	0	0	0.977961	0	-0.977961	0.46166	0.817413
ENSMUSG00000094969	Gm22420	1.87053	0	0	1.30194	0	0	0.623509	0.433979	-0.18953	0.843585	0.963275
ENSMUSG00000022708	Zbtb20	13.2381	12.9556	12.9869	13.5814	13.8273	13.7009	13.0602	13.7032	0.643013	1.82e-09	1.62e-07
ENSMUSG00000022701	Ccdc191	6.21059	6.00947	6.72372	6.56679	5.73783	4.94475	6.31459	5.74979	-0.564802	0.297951	0.795418
ENSMUSG00000029136	Rbks	8.50106	8.52687	8.10902	8.62661	8.80492	8.76833	8.37898	8.73329	0.354303	0.0521543	0.308473
ENSMUSG00000029135	Fosl2	9.20322	8.70844	8.7989	8.62125	8.23071	8.06173	8.90352	8.30456	-0.59896	0.00244763	0.0340842
ENSMUSG00000029134	Plb1	0	2.26462	0	0	1.71227	0	0.754874	0.570755	-0.184118	0.861285	0.967874
ENSMUSG00000022704	Qtrtd1	7.21378	7.23529	6.90894	7.07006	6.88573	7.18997	7.11934	7.04859	-0.0707485	0.748685	0.926697
ENSMUSG00000022707	Gbe1	12.4526	12.5426	12.7724	12.5301	12.3789	12.677	12.5892	12.5287	-0.0605462	0.554818	0.82049
ENSMUSG00000029130	Rnf32	3.53936	3.63411	0	4.98994	3.16489	4.74549	2.39116	4.3001	1.90895	0.141637	0.561341
ENSMUSG00000064792	Gm24355	1.21929	0	0	0	0	1.57846	0.406432	0.526153	0.119722	0.905561	0.975863
ENSMUSG00000038357	Camp	0	0	0	0	1.71227	0	0	0.570755	0.570755	0.488149	0.817413
ENSMUSG00000053647	Gper1	0	0	0	0	1.71227	0	0	0.570755	0.570755	0.488149	0.817413
ENSMUSG00000038351	Sgsm2	8.80944	8.56602	8.16047	7.80588	8.09914	8.21427	8.51197	8.03976	-0.472213	0.0183391	0.148822
ENSMUSG00000038352	Arl5c	0	0	2.44757	0	0	2.79899	0.815857	0.932996	0.117139	0.912508	0.9769
ENSMUSG00000103548	Gm37670	1.21929	0	0	2.77871	1.71227	0	0.406432	1.49699	1.09056	0.466187	0.817413
ENSMUSG00000020413	Hus1	7.54663	7.8412	7.62219	7.97509	7.45262	8.06173	7.67001	7.82981	0.159808	0.469187	0.817413
ENSMUSG00000020412	Ascc2	10.6679	10.4656	11.038	10.3008	10.5608	10.4771	10.7238	10.4462	-0.277588	0.0366725	0.243914
ENSMUSG00000028668	Eloa	11.5863	11.3583	11.3593	11.2927	11.3988	11.4543	11.4346	11.3819	-0.0527078	0.568947	0.827655
ENSMUSG00000028669	Pithd1	8.31502	8.69966	8.27901	8.59961	8.48563	8.56391	8.43123	8.54971	0.118485	0.572729	0.830748
ENSMUSG00000020415	Pttg1	9.65933	9.51494	9.14665	9.89951	9.76039	9.89262	9.4403	9.85084	0.410539	0.00838802	0.0864128
ENSMUSG00000028664	Ephb2	3.53936	2.26462	4.46996	2.4321	2.74241	0	3.42465	1.72484	-1.69981	0.188159	0.648179
ENSMUSG00000064797	Gm24357	1.21929	1.18169	1.0798	0	1.09651	1.57846	1.16026	0.891658	-0.268604	0.925051	0.98142
ENSMUSG00000109194	Gm44570	0	2.26462	0	0	0	0	0.754874	0	-0.754874	0.482514	0.817413
ENSMUSG00000109195	Gm45038	0	0	1.0798	0	0	0	0.359933	0	-0.359933	0.563571	0.823631
ENSMUSG00000109198	D7Bwg0826e	0	0	2.1181	2.4321	0	0	0.706034	0.810701	0.104666	0.914086	0.9769
ENSMUSG00000102367	Kiss1	0	0	0	0	2.4734	0	0	0.824466	0.824466	0.46085	0.817413
ENSMUSG00000102365	Gm37045	2.31759	0	0	0	0	0	0.77253	0	-0.77253	0.481172	0.817413
ENSMUSG00000107906	Gm5580	3.36433	3.63411	1.0798	2.77871	3.33728	3.45056	2.69275	3.18885	0.496102	0.873422	0.971292
ENSMUSG00000107909	Gm44143	2.93388	0	0	3.66957	2.14245	0	0.977961	1.93734	0.95938	0.586169	0.841302
ENSMUSG00000097530	Kansl2-ps	7.77377	7.70751	7.15426	7.26136	7.03094	7.28492	7.54518	7.19241	-0.352775	0.130757	0.536275
ENSMUSG00000062908	Acadm	13.3271	13.4101	13.0426	13.1234	13.2673	13.2735	13.2599	13.2214	-0.0385662	0.649546	0.878824
ENSMUSG00000062901	Klhl24	11.6262	11.7459	11.5477	11.0855	11.0749	11.1868	11.6399	11.1157	-0.524212	1.28e-07	7.5e-06
ENSMUSG00000054871	Tmem158	4.47595	3.63411	3.95221	2.77871	4.17597	4.51422	4.02075	3.82297	-0.197785	0.913821	0.9769
ENSMUSG00000062906	Hdac10	7.42923	7.54063	7.34423	7.70815	7.84432	7.17021	7.43803	7.57423	0.136194	0.478792	0.817413
ENSMUSG00000089155	Gm23582	0	0	0	3.05797	0	0	0	1.01932	1.01932	0.449341	0.817413
ENSMUSG00000087128	Gm12655	0	0	0	2.77871	0	0	0	0.926237	0.926237	0.454565	0.817413
ENSMUSG00000038970	Lmtk2	10.2765	10.2911	10.0101	10.0387	9.97631	9.84043	10.1926	9.95181	-0.240766	0.0523319	0.308964
ENSMUSG00000038975	Rabggtb	10.1938	10.1355	10.0516	9.82221	9.86095	9.9488	10.127	9.87732	-0.249654	0.0254903	0.188762
ENSMUSG00000038976	Ppp1r9b	8.29074	7.7759	8.24763	7.92376	8.18064	8.47004	8.10476	8.19148	0.0867232	0.714892	0.911106
ENSMUSG00000103103	4833445I07Rik	2.31759	4.64962	3.72805	0	3.63038	0	3.56509	1.21013	-2.35496	0.227688	0.711221
ENSMUSG00000025161	Slc16a3	3.53936	0	3.46253	0	2.14245	4.94475	2.33397	2.3624	0.0284355	0.663288	0.88656
ENSMUSG00000025162	Csnk1d	11.5737	11.6306	11.6607	11.6214	11.4769	11.5943	11.6217	11.5642	-0.0574656	0.511825	0.817413
ENSMUSG00000025163	Cd7	4.19127	0	4.5407	0	2.96906	0	2.91066	0.989686	-1.92097	0.179455	0.63265
ENSMUSG00000025165	Sectm1a	4.7136	4.32383	4.14618	3.29184	0	0	4.39454	1.09728	-3.29726	0.0303669	0.213208
ENSMUSG00000025169	Ogfod3	7.50504	7.41759	7.686	7.43024	7.8656	7.49014	7.53621	7.59533	0.0591153	0.756358	0.929979
ENSMUSG00000018651	Tada2a	6.79768	7.0951	6.76862	7.10119	7.21906	6.33021	6.88713	6.88349	-0.00364611	0.868288	0.970054
ENSMUSG00000018654	Ikzf1	7.27693	5.89112	7.36387	6.71503	5.73783	6.46608	6.84397	6.30631	-0.537659	0.108989	0.483974
ENSMUSG00000032058	Ppp2r1b	9.38618	9.52242	9.44058	9.2014	9.41791	9.61047	9.44973	9.40992	-0.0398055	0.781862	0.940407
ENSMUSG00000032059	Alg9	9.86443	9.86815	10.1887	10.3258	10.0877	10.3379	9.97376	10.2504	0.276667	0.0427424	0.271425
ENSMUSG00000032050	Rdx	13.0157	13.0145	13.1105	13.1184	13.0447	13.2853	13.0469	13.1495	0.10256	0.280594	0.776747
ENSMUSG00000032051	Fdx1	11.6757	11.6318	11.4216	12.1126	12.188	12.0667	11.5763	12.1224	0.546108	1.34e-07	7.85e-06
ENSMUSG00000039000	Ube3c	11.0406	11.1446	11.2025	11.2227	11.1527	11.2529	11.1292	11.2094	0.0802435	0.445673	0.817413
ENSMUSG00000039001	Rps21	11.1584	11.0381	10.9651	10.7715	11.1221	10.9039	11.0539	10.9325	-0.121404	0.307511	0.803297
ENSMUSG00000052485	Tmem171	0	2.26462	0	0	0	0	0.754874	0	-0.754874	0.482514	0.817413
ENSMUSG00000039007	Cpq	10.845	10.6212	10.372	10.5734	10.6308	10.5323	10.6128	10.5789	-0.0339183	0.70419	0.905582
ENSMUSG00000039005	Tlr4	5.9254	5.28735	7.01213	6.45072	5.96514	6.01275	6.07496	6.14287	0.0679121	0.819879	0.953225
ENSMUSG00000053286	Trmt1l	9.33666	9.24628	9.45439	10.4519	10.1131	9.82787	9.34578	10.1309	0.78517	2.75e-07	1.47e-05
ENSMUSG00000053289	Ddx10	9.38332	9.16254	9.38399	8.80265	8.98748	9.27796	9.30995	9.0227	-0.287251	0.0659742	0.357759
ENSMUSG00000060566	Rpl21-ps3	0	0	0	0	1.09651	0	0	0.365505	0.365505	0.530725	0.820333
ENSMUSG00000021423	Ly86	8.20242	7.3519	7.55542	6.93834	6.96674	6.73179	7.70325	6.87896	-0.82429	0.00144176	0.022482
ENSMUSG00000024414	Mrpl27	9.29455	8.95328	8.91995	9.37703	9.3004	9.68548	9.05593	9.4543	0.398372	0.0143249	0.12537
ENSMUSG00000024413	Npc1	13.019	13.013	12.8643	12.4545	12.321	12.6491	12.9654	12.4749	-0.490518	3.55e-06	0.000146834
ENSMUSG00000021427	Ssr1	12.4078	12.2921	12.6311	12.3691	12.5806	12.5243	12.4436	12.4913	0.047699	0.708838	0.908051
ENSMUSG00000024410	3110002H16Rik	9.91096	10.0621	9.85394	9.93451	9.80881	10.0975	9.94232	9.94692	0.00460186	0.994134	0.99763
ENSMUSG00000086657	Stamos	3.53936	4.32383	3.13688	2.77871	2.96906	2.31412	3.66669	2.6873	-0.979394	0.275289	0.770269
ENSMUSG00000050370	Ch25h	3.1651	0	2.44757	0	0	0	1.87089	0	-1.87089	0.270427	0.763582
ENSMUSG00000100454	Gm28901	0	0	2.1181	0	2.4734	0	0.706034	0.824466	0.118431	0.896093	0.975863
ENSMUSG00000100455	Gm29170	2.6584	3.90233	5.1508	2.4321	3.75725	4.07827	3.90385	3.42254	-0.481303	0.428687	0.817413
ENSMUSG00000048895	Cdk5r1	4.7136	5.4215	3.60139	1.97497	2.74241	6.05647	4.57883	3.59128	-0.987545	0.89467	0.975863
ENSMUSG00000048897	Zfp710	8.14941	8.82196	8.89316	8.61587	8.58734	7.24769	8.62151	8.1503	-0.471217	0.182622	0.63912
ENSMUSG00000053754	Chd8	11.335	11.4076	11.673	11.8187	11.6702	11.3351	11.4719	11.608	0.136111	0.291353	0.787458
ENSMUSG00000100017	2410022M11Rik	6.18447	6.46796	6.42029	5.58193	5.18149	5.41673	6.35757	5.39338	-0.964192	0.00863711	0.0881448
ENSMUSG00000076999	Gm22426	0	1.18169	0	0	0	0	0.393897	0	-0.393897	0.55464	0.820333
ENSMUSG00000032946	Rasgrp2	7.77377	7.12162	7.51207	8.08039	8.23071	8.19484	7.46915	8.16865	0.699491	0.00176896	0.0261398
ENSMUSG00000032942	Ucp3	0	0	2.71561	0	0	0	0.905204	0	-0.905204	0.467025	0.817413
ENSMUSG00000086382	Chrna1os	4.19127	4.41243	4.23419	0	5.1355	3.69143	4.2793	2.94231	-1.33698	0.795946	0.946145
ENSMUSG00000086387	Gm15563	0	0	0	0	2.96906	0	0	0.989686	0.989686	0.450429	0.817413
ENSMUSG00000086389	Gm15998	4.91759	5.65732	5.50937	0	0	3.45056	5.36142	1.15019	-4.21124	0.000145478	0.00351545
ENSMUSG00000033096	Apmap	10.6854	10.5314	10.5795	10.5168	10.563	10.615	10.5988	10.5649	-0.0338235	0.704592	0.905598
ENSMUSG00000043740	B430306N03Rik	6.53379	4.12842	6.10723	6.12687	5.1355	3.45056	5.58982	4.90431	-0.685505	0.330827	0.817413
ENSMUSG00000033099	Nol12	8.06606	8.42938	8.70577	8.56653	8.60009	8.44559	8.4004	8.5374	0.137	0.558132	0.823314
ENSMUSG00000110438	Gm45756	1.87053	0	1.0798	0	0	0	0.983442	0	-0.983442	0.483429	0.817413
ENSMUSG00000060560	Ces4a	6.84845	7.72492	7.2733	7.60332	7.77102	7.00154	7.28222	7.45863	0.176407	0.545926	0.820333
ENSMUSG00000036172	Cd200r3	0	0	2.71561	0	0	0	0.905204	0	-0.905204	0.467025	0.817413
ENSMUSG00000004071	Cdip1	12.2558	12.1128	11.8064	12.1573	12.1954	12.4708	12.0583	12.2745	0.21614	0.10839	0.482807
ENSMUSG00000004070	Hmox2	10.7267	10.8801	10.6611	10.8307	10.8208	10.503	10.756	10.7182	-0.0378142	0.777945	0.938865
ENSMUSG00000048234	Rnf149	12.604	12.2499	12.7052	12.3425	12.3706	12.4848	12.5197	12.3993	-0.120358	0.244621	0.732996
ENSMUSG00000110433	Gm45820	4.29253	4.12842	3.13688	5.11723	3.16489	2.31412	3.85261	3.53208	-0.320532	0.91118	0.976443
ENSMUSG00000096699	Rps19-ps4	2.31759	2.8762	3.13688	3.82684	2.96906	3.69143	2.77689	3.49578	0.718886	0.453393	0.817413
ENSMUSG00000072692	Rpl37rt	8.99365	8.91209	8.82748	9.22632	9.04769	9.07506	8.91107	9.11636	0.205285	0.160137	0.598549
ENSMUSG00000072694	1500011B03Rik	2.6584	3.90233	3.13688	3.05797	5.08801	2.79899	3.23254	3.64832	0.415785	0.417956	0.817413
ENSMUSG00000030541	Idh2	11.4566	11.4946	11.1922	11.3277	11.2889	11.4461	11.3811	11.3542	-0.0269063	0.742824	0.924622
ENSMUSG00000109739	Gm17949	0	0	0	1.97497	0	0	0	0.658323	0.658323	0.478676	0.817413
[truncated: 20,862 more rows]
