# Supplementary material for: Combined Analysis of Expression Profiles in a Mouse Model and Patients Identified BHMT2 as a New Regulator of Lipid Metabolism in Metabolic-Associated Fatty Liver Disease
Source: Front Cell Dev Biol. 2021 Nov 11;9:741710. doi: 10.3389/fcell.2021.741710 (PMC8636031; doi:10.3389/fcell.2021.741710)
Supplement: Supplementary file 7 [file Table5.XLSX]

## Sheet: Sheet1
Table S5.Differential genes with overlapping gene were excluded in liver tissues of MAFLD patients(log2foldchange≥0.5 or ≤-0.5)
Gene_ID	Gene Symbol（human）	description	Average of Patients(G1)	Average of Controls (G2)	G2_vs_G1_log2FoldChange	G2_vs_G1_Pvalue
ENSG00000234449	FAM239A	family with sequence similarity 239 member A (non-protein coding)	0.636456	4.64726	4.0108	0.049479
ENSG00000213088	ACKR1	atypical chemokine receptor 1 (Duffy blood group)	3.59871	6.7547	3.15598	0.00500566
ENSG00000197406	DIO3	iodothyronine deiodinase 3	1.61981	4.65559	3.03578	0.00430837
ENSG00000169688	MT1B	metallothionein 1B	0	2.87687	2.87687	0.0177462
ENSG00000273888	FRMD6-AS1	FRMD6 antisense RNA 1	0.239965	2.90335	2.66339	5.74e-07
ENSG00000163993	S100P	S100 calcium binding protein P	4.91589	7.47069	2.5548	0.0225857
ENSG00000205361	MT1DP	metallothionein 1D, pseudogene	4.15762	6.70328	2.54566	0.00234054
ENSG00000128313	APOL5	apolipoprotein L5	1.4101	3.86992	2.45982	0.0471961
ENSG00000214736	TOMM6	translocase of outer mitochondrial membrane 6	5.40058	7.85902	2.45845	0.0148835
ENSG00000149646	CNBD2	cyclic nucleotide binding domain containing 2	1.59733	3.95621	2.35887	7.06e-05
ENSG00000205362	MT1A	metallothionein 1A	8.14583	10.4484	2.30254	0.000544467
ENSG00000044012	GUCA2B	guanylate cyclase activator 2B	1.34708	3.52337	2.17629	0.0418616
ENSG00000205364	MT1M	metallothionein 1M	9.5237	11.6265	2.10284	0.00430651
ENSG00000177508	IRX3	iroquois homeobox 3	4.0353	6.12958	2.09428	0.00734021
ENSG00000145506	NKD2	naked cuticle homolog 2	3.69757	5.78303	2.08546	0.000847523
ENSG00000237054	PRMT5-AS1	PRMT5 antisense RNA 1	1.60847	3.67339	2.06493	0.000221178
ENSG00000186198	SLC51B	solute carrier family 51 beta subunit	3.69026	5.75498	2.06472	0.00705512
ENSG00000182752	PAPPA	pappalysin 1	5.71387	7.71747	2.0036	0.0213304
ENSG00000215595	C20orf202	chromosome 20 open reading frame 202	0.708843	2.70327	1.99442	0.0214682
ENSG00000138135	CH25H	cholesterol 25-hydroxylase	5.19251	7.10121	1.9087	0.00735175
ENSG00000163661	PTX3	pentraxin 3	5.05299	6.92986	1.87687	0.0148661
ENSG00000228570	NUTM2E	NUT family member 2E	0.344665	2.21839	1.87372	0.0282221
ENSG00000151640	DPYSL4	dihydropyrimidinase like 4	0.26881	2.08669	1.81788	0.00608511
ENSG00000280039	RN7SKP23	RNA, 7SK small nuclear pseudogene 23	0.300888	2.11725	1.81636	0.00473214
ENSG00000259803	SLC22A31	solute carrier family 22 member 31	0.23728	2.04846	1.81118	0.00447786
ENSG00000235576	LINC01871	long intergenic non-protein coding RNA 1871	1.51357	3.31668	1.80311	0.0196316
ENSG00000196132	MYT1	myelin transcription factor 1	2.45704	4.25012	1.79308	0.0277918
ENSG00000106366	SERPINE1	serpin family E member 1	10.3544	12.1313	1.77694	0.0403944
ENSG00000100987	VSX1	visual system homeobox 1	1.094	2.85829	1.76429	0.0337624
ENSG00000096006	CRISP3	cysteine rich secretory protein 3	3.42704	5.16849	1.74145	0.0192548
ENSG00000148344	PTGES	prostaglandin E synthase	3.90375	5.64133	1.73757	6.76e-05
ENSG00000234814	SVILP1	supervillin pseudogene 1	1.32871	3.05037	1.72166	0.0188515
ENSG00000116132	PRRX1	paired related homeobox 1	4.78304	6.4881	1.70506	0.0464093
ENSG00000250295	RDH10-AS1	RDH10 antisense RNA 1	1.56682	3.27183	1.70502	0.0224643
ENSG00000272968	RBAK-RBAKDN	RBAK-RBAKDN readthrough	0.618994	2.31745	1.69846	0.0186289
ENSG00000237892	KLF7-IT1	KLF7 intronic transcript 1	0.434947	2.12268	1.68773	0.00431262
ENSG00000274026	FAM27E3	family with sequence similarity 27 member E3	2.17433	3.84925	1.67492	0.0202731
ENSG00000171295	ZNF440	zinc finger protein 440	5.26326	6.93032	1.66706	0.0249939
ENSG00000225670	CADM3-AS1	CADM3 antisense RNA 1	0.350409	2.00745	1.65704	0.0466063
ENSG00000189410	SH2D5	SH2 domain containing 5	0.637591	2.29216	1.65457	0.0453879
ENSG00000233559	LINC00513	long intergenic non-protein coding RNA 513	2.54613	4.19462	1.6485	0.00167384
ENSG00000106236	NPTX2	neuronal pentraxin 2	4.76306	6.3989	1.63584	0.0353921
ENSG00000258498	DIO3OS	DIO3 opposite strand/antisense RNA (head to head)	4.18561	5.82066	1.63505	0.00160564
ENSG00000138685	FGF2	fibroblast growth factor 2	6.80597	8.44015	1.63417	0.025049
ENSG00000075240	GRAMD4	GRAM domain containing 4	10.0163	11.6262	1.60982	0.000420242
ENSG00000237372	UNQ6494	uncharacterized LOC100129066	1.64602	3.23899	1.59297	0.0364146
ENSG00000154620	TMSB4Y	thymosin beta 4, Y-linked	2.78383	4.37258	1.58875	0.0266431
ENSG00000269153	LYPLA2P2	lysophospholipase II pseudogene 2	0.36943	1.95453	1.5851	0.00541659
ENSG00000255986	MT1JP	metallothionein 1J, pseudogene	5.11153	6.67926	1.56773	0.00090871
ENSG00000260549	MT1L	metallothionein 1L, pseudogene	7.82073	9.38411	1.56338	0.0387464
ENSG00000178828	RNF186	ring finger protein 186	2.13895	3.68005	1.5411	0.0435221
ENSG00000108691	CCL2	C-C motif chemokine ligand 2	8.99695	10.5338	1.53689	0.00826966
ENSG00000259905	PWRN1	Prader-Willi region non-protein coding RNA 1	0.6056	2.14211	1.53651	0.0229879
ENSG00000205867	KRTAP5-2	keratin associated protein 5-2	0.254826	1.78843	1.53361	0.018714
ENSG00000100558	PLEK2	pleckstrin 2	5.46989	6.99276	1.52287	0.0177417
ENSG00000184344	GDF3	growth differentiation factor 3	0	1.52188	1.52188	0.0157044
ENSG00000104728	ARHGEF10	Rho guanine nucleotide exchange factor 10	4.86644	6.37688	1.51044	0.00187655
ENSG00000135750	KCNK1	potassium two pore domain channel subfamily K member 1	7.50742	9.01182	1.5044	3.62e-05
ENSG00000135482	ZC3H10	zinc finger CCCH-type containing 10	4.90826	6.40194	1.49368	0.0268033
ENSG00000112096	SOD2	superoxide dismutase 2	12.1592	13.6482	1.48893	0.000345369
ENSG00000239332	LINC01119	long intergenic non-protein coding RNA 1119	3.21178	4.69929	1.48751	0.0459633
ENSG00000213085	CFAP45	cilia and flagella associated protein 45	0.981954	2.46631	1.48436	0.0420431
ENSG00000125962	ARMCX5	armadillo repeat containing, X-linked 5	6.76494	8.24223	1.47728	5.81e-05
ENSG00000237437	ASS1P12	argininosuccinate synthetase 1 pseudogene 12	0.594047	2.07125	1.47721	0.0278595
ENSG00000243650	RN7SL834P	RNA, 7SL, cytoplasmic 834, pseudogene	1.22911	2.6898	1.4607	0.0203637
ENSG00000167536	DHRS13	dehydrogenase/reductase 13	8.34781	9.78541	1.4376	0.0131955
ENSG00000261241	LINC02128	long intergenic non-protein coding RNA 2128	4.87436	6.30591	1.43155	0.00278399
ENSG00000125931	CITED1	Cbp/p300 interacting transactivator with Glu/Asp rich carboxy-terminal domain 1	0.87441	2.30346	1.42905	0.0294349
ENSG00000139572	GPR84	G protein-coupled receptor 84	2.22151	3.64875	1.42724	0.0397532
ENSG00000179431	FJX1	four jointed box 1	6.02976	7.4515	1.42173	0.0127284
ENSG00000261461	UBE2MP1	ubiquitin conjugating enzyme E2 M pseudogene 1	1.32517	2.74198	1.41681	0.0337352
ENSG00000108551	RASD1	ras related dexamethasone induced 1	9.95835	11.3711	1.41273	0.0436958
ENSG00000235698	PA2G4P2	proliferation-associated 2G4 pseudogene 2	1.82991	3.2251	1.39519	0.0103595
ENSG00000157315	TMED6	transmembrane p24 trafficking protein 6	6.63925	8.01817	1.37891	0.0111896
ENSG00000214110	LDHAP4	lactate dehydrogenase A pseudogene 4	7.38371	8.75571	1.372	0.0426357
ENSG00000118596	SLC16A7	solute carrier family 16 member 7	7.62076	8.99048	1.36972	0.0106465
ENSG00000106278	PTPRZ1	protein tyrosine phosphatase, receptor type Z1	4.29624	5.65861	1.36236	0.0117386
ENSG00000142178	SIK1	salt inducible kinase 1	7.97541	9.33297	1.35756	0.0459435
ENSG00000181649	PHLDA2	pleckstrin homology like domain family A member 2	4.3229	5.66932	1.34641	0.0100365
ENSG00000137265	IRF4	interferon regulatory factor 4	5.99907	7.34039	1.34132	0.00346269
ENSG00000244161	FLNB-AS1	FLNB antisense RNA 1	4.39123	5.72755	1.33632	0.00172452
ENSG00000136997	MYC	MYC proto-oncogene, bHLH transcription factor	8.05935	9.38649	1.32715	0.00697252
ENSG00000123999	INHA	inhibin alpha subunit	0.239965	1.5626	1.32263	0.0232674
ENSG00000103426	CORO7-PAM16	CORO7-PAM16 readthrough	2.15818	3.47973	1.32155	0.0473339
ENSG00000224177	LINC00570	long intergenic non-protein coding RNA 570	0.254826	1.57031	1.31548	0.0453749
ENSG00000137801	THBS1	thrombospondin 1	11.0359	12.3461	1.31024	0.00825141
ENSG00000108244	KRT23	keratin 23	3.36279	4.66889	1.30609	0.0398512
ENSG00000161328	LRRC56	leucine rich repeat containing 56	3.07049	4.37467	1.30418	0.0448314
ENSG00000174564	IL20RB	interleukin 20 receptor subunit beta	4.73468	6.03813	1.30345	0.0165836
ENSG00000123610	TNFAIP6	TNF alpha induced protein 6	2.0669	3.36125	1.29435	0.0480376
ENSG00000188613	NANOS1	nanos C2HC-type zinc finger 1	2.99748	4.28694	1.28946	0.00199895
ENSG00000169239	CA5B	carbonic anhydrase 5B	6.58229	7.87118	1.28888	0.00178955
ENSG00000177197	PCNPP5	PEST containing nuclear protein pseudogene 5	1.22487	2.51137	1.2865	0.0493028
ENSG00000213943	KRT18P17	keratin 18 pseudogene 17	1.4267	2.70972	1.28302	0.016239
ENSG00000264293	RN7SL657P	RNA, 7SL, cytoplasmic 657, pseudogene	1.84762	3.12852	1.2809	0.00834886
ENSG00000264743	DPRXP4	divergent-paired related homeobox pseudogene 4	0.367388	1.6455	1.27811	0.0271405
ENSG00000278527	SNORD22	Small nucleolar RNA SNORD22	2.35327	3.62896	1.27569	0.0353774
ENSG00000245694	CRNDE	colorectal neoplasia differentially expressed	3.21281	4.48405	1.27123	0.0113502
ENSG00000162840	MT2P1	metallothionein 2 pseudogene 1	2.04447	3.30355	1.25908	0.0162991
ENSG00000136842	TMOD1	tropomodulin 1	9.51511	10.7705	1.2554	0.000452039
ENSG00000153234	NR4A2	nuclear receptor subfamily 4 group A member 2	6.34601	7.60055	1.25454	0.00038248
ENSG00000115602	IL1RL1	interleukin 1 receptor like 1	7.49207	8.74278	1.25071	0.0143329
ENSG00000200087	SNORA73B	small nucleolar RNA, H/ACA box 73B	2.67247	3.91813	1.24566	0.00678037
ENSG00000183682	BMP8A	bone morphogenetic protein 8a	1.26854	2.51332	1.24479	0.0209767
ENSG00000125148	MT2A	metallothionein 2A	13.1241	14.3676	1.24347	0.00222802
ENSG00000175768	TOMM5	translocase of outer mitochondrial membrane 5	8.80616	10.0481	1.24198	0.0145624
ENSG00000185634	SHC4	SHC adaptor protein 4	2.35293	3.59477	1.24184	0.0013785
ENSG00000185338	SOCS1	suppressor of cytokine signaling 1	6.36377	7.59261	1.22885	0.041018
ENSG00000253676	TAGLN2P1	transgelin 2 pseudogene 1	3.54771	4.77026	1.22255	0.00387565
ENSG00000126391	FRMD8	FERM domain containing 8	7.75986	8.98236	1.2225	0.00865731
ENSG00000275491	LINC01730	long intergenic non-protein coding RNA 1730	1.28688	2.50717	1.22029	0.0349836
ENSG00000257913	DDN-AS1	DDN and PRKAG1 antisense RNA 1	0.732142	1.94867	1.21653	0.0452516
ENSG00000272015	SNORA62	Small nucleolar RNA SNORA62/SNORA6 family	1.09689	2.3111	1.21421	0.047774
ENSG00000258643	BCL2L2-PABPN1	BCL2L2-PABPN1 readthrough	3.1465	4.35829	1.2118	0.0318712
ENSG00000176170	SPHK1	sphingosine kinase 1	5.11263	6.31486	1.20223	0.00315389
ENSG00000241158	ADAMTS9-AS1	ADAMTS9 antisense RNA 1	3.67541	4.86508	1.18967	0.00997898
ENSG00000198625	MDM4	MDM4, p53 regulator	7.4857	8.66587	1.18017	0.0338119
ENSG00000173212	MAB21L3	mab-21 like 3	4.17529	5.35102	1.17572	0.0148463
ENSG00000187479	C11orf96	chromosome 11 open reading frame 96	9.28281	10.45	1.16723	0.0235464
ENSG00000169715	MT1E	metallothionein 1E	12.0263	13.174	1.1477	0.00309878
ENSG00000249210	GAPDHP38	glyceraldehyde 3 phosphate dehydrogenase pseudogene 38	0.41001	1.55588	1.14587	0.0464158
ENSG00000099860	GADD45B	growth arrest and DNA damage inducible beta	9.78961	10.9327	1.14306	0.000458247
ENSG00000185022	MAFF	MAF bZIP transcription factor F	7.59306	8.73513	1.14207	0.013073
ENSG00000226413	OR8T1P	olfactory receptor family 8 subfamily T member 1 pseudogene	0	1.14184	1.14184	0.0362262
ENSG00000244921	MTCYBP18	mitochondrially encoded cytochrome b pseudogene 18	0.211467	1.34455	1.13308	0.0438876
ENSG00000270269	IMMP1LP1	inner mitochondrial membrane peptidase subunit 1 pseudogene 1	0	1.12544	1.12544	0.0358813
ENSG00000231887	PRH1	proline rich protein HaeIII subfamily 1	2.99331	4.10474	1.11143	0.0496014
ENSG00000173926	2020-03-03	membrane associated ring-CH-type finger 3	5.46172	6.57163	1.10991	0.000573043
ENSG00000215483	LINC00598	long intergenic non-protein coding RNA 598	4.48407	5.59032	1.10625	0.00214251
ENSG00000117069	ST6GALNAC5	ST6 N-acetylgalactosaminide alpha-2,6-sialyltransferase 5	1.54651	2.65128	1.10478	0.0417749
ENSG00000262097	LINC02185	long intergenic non-protein coding RNA 2185	0	1.10467	1.10467	0.0403811
ENSG00000270132	WISP1-OT1	WISP1 overlapping transcript 1	1.96003	3.06201	1.10198	0.0290603
ENSG00000136048	DRAM1	DNA damage regulated autophagy modulator 1	7.79292	8.8949	1.10198	0.0149186
ENSG00000244218	RN7SL81P	RNA, 7SL, cytoplasmic 81, pseudogene	0.538755	1.63354	1.09478	0.0476766
ENSG00000169252	ADRB2	adrenoceptor beta 2	6.94753	8.03817	1.09064	7.53e-06
ENSG00000125144	MT1G	metallothionein 1G	11.5567	12.646	1.08939	0.0153543
ENSG00000221500	SNORD100	small nucleolar RNA, C/D box 100	1.5562	2.62377	1.06757	0.0267573
ENSG00000187193	MT1X	metallothionein 1X	12.328	13.3942	1.06622	0.0101893
ENSG00000140470	ADAMTS17	ADAM metallopeptidase with thrombospondin type 1 motif 17	8.00552	9.06396	1.05843	0.0168057
ENSG00000144476	ACKR3	atypical chemokine receptor 3	7.1446	8.17337	1.02877	0.0121156
ENSG00000158710	TAGLN2	transgelin 2	11.7682	12.7932	1.02501	0.00163873
ENSG00000250471	GMPSP1	guanine monophosphate synthase pseudogene 1	2.32913	3.34984	1.02071	0.0172679
ENSG00000175164	ABO	ABO, alpha 1-3-N-acetylgalactosaminyltransferase and alpha 1-3-galactosyltransferase	2.33468	3.35508	1.02041	0.0241678
ENSG00000184205	TSPYL2	TSPY like 2	8.77324	9.78998	1.01675	0.0131545
ENSG00000245711	NADK2-AS1	NADK2 antisense RNA 1	3.55184	4.56819	1.01635	0.0381057
ENSG00000103647	CORO2B	coronin 2B	4.81009	5.81975	1.00965	0.0112407
ENSG00000228649	SNHG26	small nucleolar RNA host gene 26	4.53089	5.53059	0.999705	0.00796322
ENSG00000236496	GPS2P1	G protein pathway suppressor 2 pseudogene 1	1.83304	2.83252	0.999476	0.0405984
ENSG00000131482	G6PC	glucose-6-phosphatase catalytic subunit	10.6636	11.663	0.999392	0.0023422
ENSG00000137331	IER3	immediate early response 3	8.69677	9.69243	0.995659	0.0386159
ENSG00000197182	MIRLET7BHG	MIRLET7B host gene	3.49407	4.48802	0.99395	0.0347432
ENSG00000114315	HES1	hes family bHLH transcription factor 1	8.80142	9.7915	0.990075	0.000837965
ENSG00000164236	ANKRD33B	ankyrin repeat domain 33B	4.96323	5.95026	0.987028	0.0447157
ENSG00000136383	ALPK3	alpha kinase 3	8.71223	9.6835	0.971267	0.00286717
ENSG00000163874	ZC3H12A	zinc finger CCCH-type containing 12A	7.44301	8.39242	0.949416	0.00212296
ENSG00000143761	ARF1	ADP ribosylation factor 1	12.017	12.9607	0.94373	0.00273577
ENSG00000224032	EPB41L4A-AS1	EPB41L4A antisense RNA 1	6.79409	7.73694	0.942853	0.0148126
ENSG00000184378	ACTRT3	actin related protein T3	6.08372	7.02049	0.936771	0.00309414
ENSG00000235065	RPL24P2	ribosomal protein L24 pseudogene 2	2.31174	3.24242	0.930676	0.0465284
ENSG00000167470	MIDN	midnolin	9.41815	10.345	0.926854	0.00256293
ENSG00000231234	SKP1P1	S-phase kinase associated protein 1 pseudogene 1	4.01287	4.93847	0.925604	0.0334232
ENSG00000186594	MIR22HG	MIR22 host gene	8.39264	9.31765	0.925014	0.0334612
ENSG00000198169	ZNF251	zinc finger protein 251	4.92719	5.85045	0.923268	0.042736
ENSG00000117394	SLC2A1	solute carrier family 2 member 1	6.35572	7.27114	0.915425	0.00312754
ENSG00000134107	BHLHE40	basic helix-loop-helix family member e40	11.5017	12.4129	0.911218	0.00185175
ENSG00000026036	RTEL1-TNFRSF6B	RTEL1-TNFRSF6B readthrough (NMD candidate)	5.80648	6.71665	0.910171	0.049687
ENSG00000160013	PTGIR	prostaglandin I2 (prostacyclin) receptor (IP)	6.73089	7.64045	0.909561	0.017856
ENSG00000171121	KCNMB3	potassium calcium-activated channel subfamily M regulatory beta subunit 3	5.55641	6.46266	0.906247	0.00582204
ENSG00000175785	PRIMA1	proline rich membrane anchor 1	5.19692	6.10039	0.903467	0.0399114
ENSG00000261934	PCDHGA9	protocadherin gamma subfamily A, 9	4.74321	5.64578	0.902565	0.0221024
ENSG00000163959	SLC51A	solute carrier family 51 alpha subunit	8.68049	9.57987	0.899378	0.00561205
ENSG00000109205	ODAM	odontogenic, ameloblast asssociated	0.748044	1.63812	0.890074	0.0214538
ENSG00000163435	ELF3	E74 like ETS transcription factor 3	10.4781	11.3644	0.886346	0.00417192
ENSG00000181619	GPR135	G protein-coupled receptor 135	4.32812	5.213	0.88488	0.0145565
ENSG00000142273	CBLC	Cbl proto-oncogene C	6.78081	7.65834	0.877526	0.00719595
ENSG00000115758	ODC1	ornithine decarboxylase 1	10.8489	11.7253	0.876363	0.00210971
ENSG00000144120	TMEM177	transmembrane protein 177	7.44133	8.31307	0.871746	0.00438278
ENSG00000282508	LINC01002	long intergenic non-protein coding RNA 1002	4.55194	5.42348	0.871539	0.0113384
ENSG00000236281	NDUFB9P2	NADH:ubiquinone oxidoreductase subunit B9 pseudogene 2	2.96085	3.83211	0.871258	0.0191468
ENSG00000172014	ANKRD20A4	ankyrin repeat domain 20 family member A4	2.18365	3.04711	0.863467	0.0391963
ENSG00000222009	BTBD19	BTB domain containing 19	4.45901	5.31775	0.858742	0.0223779
ENSG00000163638	ADAMTS9	ADAM metallopeptidase with thrombospondin type 1 motif 9	8.51399	9.36908	0.855091	0.0253308
ENSG00000164776	PHKG1	phosphorylase kinase catalytic subunit gamma 1	3.08804	3.94228	0.854236	0.00989066
ENSG00000253846	PCDHGA10	protocadherin gamma subfamily A, 10	6.79224	7.6394	0.847159	0.0388478
ENSG00000171155	C1GALT1C1	C1GALT1 specific chaperone 1	9.55003	10.3939	0.843868	0.0388062
ENSG00000223956	LINC01767	long intergenic non-protein coding RNA 1767	5.20768	6.05082	0.843144	0.0202146
ENSG00000235472	EIF4A1P7	eukaryotic translation initiation factor 4A1 pseudogene 7	2.41225	3.25403	0.841775	0.0198624
ENSG00000258102	MAP1LC3B2	microtubule associated protein 1 light chain 3 beta 2	5.06907	5.90752	0.838449	0.0206569
ENSG00000158985	CDC42SE2	CDC42 small effector 2	9.06883	9.90216	0.833329	0.0268821
ENSG00000054938	CHRDL2	chordin like 2	7.94116	8.77137	0.830211	0.0021597
ENSG00000139926	FRMD6	FERM domain containing 6	8.07755	8.90441	0.826864	3.67e-05
ENSG00000242114	MTFP1	mitochondrial fission process 1	7.17749	8.00345	0.825963	0.00205143
ENSG00000165507	C10orf10	chromosome 10 open reading frame 10	10.5254	11.351	0.825562	0.0122846
ENSG00000154930	ACSS1	acyl-CoA synthetase short chain family member 1	8.69582	9.52117	0.82535	0.0159503
ENSG00000128228	SDF2L1	stromal cell derived factor 2 like 1	8.93257	9.75707	0.824507	0.00621961
ENSG00000253767	PCDHGA8	protocadherin gamma subfamily A, 8	5.77039	6.59446	0.82407	0.00293418
ENSG00000278175	GLIDR	glioblastoma down-regulated RNA	4.94846	5.77096	0.822502	0.0132961
ENSG00000172985	SH3RF3	SH3 domain containing ring finger 3	6.46586	7.28699	0.821135	0.0237345
ENSG00000165195	PIGA	phosphatidylinositol glycan anchor biosynthesis class A	8.04946	8.86605	0.816595	0.00208277
ENSG00000226479	TMEM185B	transmembrane protein 185B	7.41844	8.22753	0.809086	0.0227352
ENSG00000189060	H1F0	H1 histone family member 0	12.312	13.1197	0.807669	0.04744
ENSG00000118515	SGK1	serum/glucocorticoid regulated kinase 1	10.6999	11.504	0.804072	0.0307368
ENSG00000135111	TBX3	T-box 3	9.90532	10.7091	0.803818	0.000125086
ENSG00000187079	TEAD1	TEA domain transcription factor 1	8.34129	9.144	0.802707	0.0403595
ENSG00000144649	FAM198A	family with sequence similarity 198 member A	7.90352	8.70458	0.801061	0.00691835
ENSG00000102265	TIMP1	TIMP metallopeptidase inhibitor 1	12.2671	13.0629	0.795851	0.0281329
ENSG00000197905	TEAD4	TEA domain transcription factor 4	6.6203	7.41498	0.79468	0.0241648
ENSG00000125459	MSTO1	misato 1, mitochondrial distribution and morphology regulator	8.32295	9.11299	0.790046	0.00333531
ENSG00000105835	NAMPT	nicotinamide phosphoribosyltransferase	14.149	14.938	0.788962	0.00645482
ENSG00000143179	UCK2	uridine-cytidine kinase 2	8.30935	9.09069	0.781343	0.00398678
ENSG00000025708	TYMP	thymidine phosphorylase	10.0594	10.8399	0.780439	0.0248106
ENSG00000139675	HNRNPA1L2	heterogeneous nuclear ribonucleoprotein A1-like 2	6.02073	6.79796	0.77723	0.0268346
ENSG00000151364	KCTD14	potassium channel tetramerization domain containing 14	8.13367	8.91044	0.776774	0.00580671
ENSG00000225972	MTND1P23	mitochondrially encoded NADH:ubiquinone oxidoreductase core subunit 1 pseudogene 23	10.2858	11.0619	0.77609	0.000812526
ENSG00000241923	RPL14P3	ribosomal protein L14 pseudogene 3	3.70777	4.48363	0.775861	0.00608887
ENSG00000162551	ALPL	alkaline phosphatase, liver/bone/kidney	10.9364	11.7111	0.774715	0.0216996
ENSG00000268996	MAN1B1-AS1	MAN1B1 antisense RNA 1 (head to head)	3.64378	4.41095	0.767171	0.0482464
ENSG00000231721	LINC-PINT	long intergenic non-protein coding RNA, p53 induced transcript	5.92731	6.69302	0.765713	0.0228122
ENSG00000115970	THADA	THADA, armadillo repeat containing	9.49107	10.2565	0.765384	0.00152557
ENSG00000080031	PTPRH	protein tyrosine phosphatase, receptor type H	8.47939	9.24331	0.763925	0.0216682
ENSG00000131759	RARA	retinoic acid receptor alpha	8.86434	9.62718	0.762847	0.000297555
ENSG00000163121	NEURL3	neuralized E3 ubiquitin protein ligase 3	4.81767	5.57726	0.759596	0.029147
ENSG00000110218	PANX1	pannexin 1	8.87461	9.63403	0.759424	0.0038378
ENSG00000152332	UHMK1	U2AF homology motif kinase 1	10.1601	10.9188	0.75876	0.0191618
ENSG00000089280	FUS	FUS RNA binding protein	10.6998	11.4561	0.756308	0.0448822
ENSG00000163866	SMIM12	small integral membrane protein 12	9.12257	9.8756	0.753028	0.00670709
ENSG00000185561	TLCD2	TLC domain containing 2	9.13442	9.88691	0.752495	0.0401862
ENSG00000070669	ASNS	asparagine synthetase (glutamine-hydrolyzing)	7.7013	8.44804	0.746747	0.023025
ENSG00000235363	SNRPGP10	small nuclear ribonucleoprotein polypeptide G pseudogene 10	5.7329	6.47933	0.746423	0.000517631
ENSG00000253919	THAP12P7	THAP domain containing 12 pseudogene 7	3.85541	4.60035	0.744949	0.0331549
ENSG00000229644	NAMPTP1	nicotinamide phosphoribosyltransferase pseudogene 1	10.553	11.2977	0.7447	0.00863416
ENSG00000167671	UBXN6	UBX domain protein 6	10.2662	11.0092	0.742945	0.000716507
ENSG00000111215	PRR4	proline rich 4 (lacrimal)	4.45605	5.19724	0.741193	0.0296644
ENSG00000133321	RARRES3	retinoic acid receptor responder 3	9.93046	10.6695	0.739019	0.00589623
ENSG00000184408	KCND2	potassium voltage-gated channel subfamily D member 2	2.99704	3.73283	0.735796	0.0459445
ENSG00000242125	SNHG3	small nucleolar RNA host gene 3	7.88688	8.6221	0.735223	0.00644406
ENSG00000158156	XKR8	XK related 8	8.20018	8.93491	0.734729	0.000686587
ENSG00000124145	SDC4	syndecan 4	12.0897	12.8226	0.732885	0.011406
ENSG00000203666	EFCAB2	EF-hand calcium binding domain 2	6.98626	7.71832	0.732059	0.0110414
ENSG00000198517	MAFK	MAF bZIP transcription factor K	8.21768	8.94743	0.729755	0.0180062
ENSG00000114737	CISH	cytokine inducible SH2 containing protein	9.3665	10.095	0.728449	0.0321407
ENSG00000099869	IGF2-AS	IGF2 antisense RNA	3.3684	4.09515	0.726755	0.0341388
ENSG00000163577	EIF5A2	eukaryotic translation initiation factor 5A2	7.03124	7.75781	0.72657	0.0173504
ENSG00000166199	ALKBH3	alkB homolog 3, alpha-ketoglutaratedependent dioxygenase	7.95509	8.67752	0.722433	0.000131664
ENSG00000164142	FAM160A1	family with sequence similarity 160 member A1	4.64386	5.363	0.719133	0.0289294
ENSG00000131459	GFPT2	glutamine-fructose-6-phosphate transaminase 2	5.84343	6.55842	0.714995	0.0351367
ENSG00000114853	ZBTB47	zinc finger and BTB domain containing 47	7.61828	8.33224	0.71396	0.0122764
ENSG00000179403	VWA1	von Willebrand factor A domain containing 1	10.7169	11.4281	0.711238	0.00652265
ENSG00000112773	FAM46A	family with sequence similarity 46 member A	9.53655	10.2464	0.709827	0.0219765
ENSG00000242457	RBBP4P2	RB binding protein 4 pseudogene 2	2.26438	2.9736	0.709221	0.0457891
ENSG00000233966	UBE2SP1	ubiquitin conjugating enzyme E2 S pseudogene 1	3.21661	3.92445	0.707843	0.0312655
ENSG00000258429	PDF	peptide deformylase (mitochondrial)	7.96641	8.6724	0.705991	0.00321892
ENSG00000115641	FHL2	four and a half LIM domains 2	7.69089	8.3964	0.70551	0.0144398
ENSG00000099769	IGFALS	insulin like growth factor binding protein acid labile subunit	8.75571	9.46101	0.705291	0.0291046
ENSG00000268388	FENDRR	FOXF1 adjacent non-coding developmental regulatory RNA	4.86248	5.56768	0.705194	0.0300406
ENSG00000152795	HNRNPDL	heterogeneous nuclear ribonucleoprotein D like	11.605	12.3082	0.703209	0.0127808
ENSG00000182057	OGFRP1	opioid growth factor receptor pseudogene 1	3.19086	3.89405	0.703187	0.0395626
ENSG00000259051	HNRNPUP1	heterogeneous nuclear ribonucleoprotein U pseudogene 1	4.60136	5.30394	0.702589	0.036341
ENSG00000230844	ZNF674-AS1	ZNF674 antisense RNA 1 (head to head)	5.40969	6.11219	0.702499	0.0131755
ENSG00000175727	MLXIP	MLX interacting protein	10.5736	11.2749	0.701233	0.0277997
ENSG00000157613	CREB3L1	cAMP responsive element binding protein 3 like 1	5.16913	5.87009	0.700957	0.0329527
ENSG00000122035	RASL11A	RAS like family 11 member A	7.29359	7.9916	0.698007	0.00693674
ENSG00000198855	FICD	FIC domain containing	8.67158	9.36623	0.694647	0.0112198
ENSG00000118965	WDR35	WD repeat domain 35	7.11238	7.8046	0.692223	0.0116169
ENSG00000101966	XIAP	X-linked inhibitor of apoptosis	7.9534	8.64558	0.692175	0.0085744
ENSG00000177669	MBOAT4	membrane bound O-acyltransferase domain containing 4	3.05428	3.74319	0.688908	0.0283034
ENSG00000184164	CRELD2	cysteine rich with EGF like domains 2	10.4122	11.0999	0.687661	0.00948856
ENSG00000230673	PABPC1P3	poly(A) binding protein cytoplasmic 1 pseudogene 3	4.45594	5.14166	0.685723	0.0137151
ENSG00000166401	SERPINB8	serpin family B member 8	7.58369	8.26876	0.685068	0.0258196
ENSG00000132768	DPH2	DPH2 homolog	8.16342	8.84797	0.684549	0.00348357
ENSG00000141994	DUS3L	dihydrouridine synthase 3 like	7.50089	8.18537	0.684473	0.00306589
ENSG00000154640	BTG3	BTG anti-proliferation factor 3	7.75243	8.43545	0.683018	0.0106287
ENSG00000183793	NPIPA5	nuclear pore complex interacting protein family member A5	7.31351	7.99579	0.682283	0.0255619
ENSG00000105697	HAMP	hepcidin antimicrobial peptide	12.3121	12.9936	0.681474	0.0246972
ENSG00000095380	NANS	N-acetylneuraminate synthase	10.3563	11.0371	0.680798	0.00283903
ENSG00000048162	NOP16	NOP16 nucleolar protein	8.98197	9.65752	0.675554	0.00878162
ENSG00000177337	DLGAP1-AS1	DLGAP1 antisense RNA 1	5.28331	5.9515	0.668194	0.016723
ENSG00000180817	PPA1	pyrophosphatase (inorganic) 1	11.8556	12.5236	0.668017	0.00358318
ENSG00000119523	ALG2	ALG2, alpha-1,3/1,6-mannosyltransferase	10.3156	10.9822	0.666615	0.0062518
ENSG00000184990	SIVA1	SIVA1 apoptosis inducing factor	8.75523	9.42037	0.665139	0.00190357
ENSG00000171206	TRIM8	tripartite motif containing 8	10.6809	11.345	0.664033	0.0430788
ENSG00000138623	SEMA7A	semaphorin 7A (John Milton Hagen blood group)	6.1245	6.78763	0.663129	0.0438633
ENSG00000104472	CHRAC1	chromatin accessibility complex 1	7.65679	8.3185	0.661712	0.0124771
ENSG00000148926	ADM	adrenomedullin	8.71252	9.37347	0.66095	0.0261407
ENSG00000104524	PYCR3	pyrroline-5-carboxylate reductase 3	6.98756	7.64463	0.657066	0.0139327
ENSG00000166272	WBP1L	WW domain binding protein 1 like	10.6749	11.3308	0.655836	0.0024878
ENSG00000203705	TATDN3	TatD DNase domain containing 3	7.54326	8.1973	0.654043	0.0131729
ENSG00000100401	RANGAP1	Ran GTPase activating protein 1	10.4822	11.135	0.652796	0.00927239
ENSG00000203761	MSTO2P	misato family member 2, pseudogene	6.9358	7.58692	0.651124	0.0176468
ENSG00000053372	MRTO4	MRT4 homolog, ribosome maturation factor	9.28675	9.93722	0.650474	0.0197621
ENSG00000173653	RCE1	Ras converting CAAX endopeptidase 1	6.69973	7.34954	0.64981	0.0149743
ENSG00000175602	CCDC85B	coiled-coil domain containing 85B	6.45489	7.1042	0.649302	0.045357
ENSG00000197785	ATAD3A	ATPase family, AAA domain containing 3A	8.46111	9.10981	0.648695	0.000537284
ENSG00000253626	EIF5AL1	eukaryotic translation initiation factor 5A-like 1	6.89921	7.54738	0.648169	0.00776493
ENSG00000134470	IL15RA	interleukin 15 receptor subunit alpha	8.05951	8.70556	0.64605	0.0170396
ENSG00000105971	CAV2	caveolin 2	9.62441	10.2696	0.645169	0.0405207
ENSG00000225973	PIGBOS1	PIGB opposite strand 1	6.89552	7.5386	0.643086	0.0325982
ENSG00000029993	HMGB3	high mobility group box 3	10.484	11.1264	0.642462	0.0151539
ENSG00000165997	ARL5B	ADP ribosylation factor like GTPase 5B	10.5249	11.1663	0.641368	0.00874752
ENSG00000123454	DBH	dopamine beta-hydroxylase	8.07787	8.7157	0.637825	0.0402454
ENSG00000229994	RPL5P4	ribosomal protein L5 pseudogene 4	5.62315	6.26085	0.637704	0.0278277
ENSG00000157992	KRTCAP3	keratinocyte associated protein 3	5.65128	6.28892	0.637641	0.0158431
ENSG00000173846	PLK3	polo like kinase 3	6.64047	7.27752	0.637057	0.0475738
ENSG00000188706	ZDHHC9	zinc finger DHHC-type containing 9	10.9056	11.5422	0.636617	0.0119936
ENSG00000236603	RANP1	RAN, member RAS oncogene family pseudogene 1	6.26562	6.90094	0.635319	0.0118024
ENSG00000149489	ROM1	retinal outer segment membrane protein 1	6.24655	6.88047	0.633917	0.0473577
ENSG00000197714	ZNF460	zinc finger protein 460	4.97657	5.61017	0.633597	0.0400172
ENSG00000273604	EPOP	elongin BC and polycomb repressive complex 2 associated protein	7.0837	7.71637	0.63267	0.00385702
ENSG00000140157	NIPA2	non imprinted in Prader-Willi/Angelman syndrome 2	9.47795	10.1104	0.632457	0.000189128
ENSG00000183298	RPSAP19	ribosomal protein SA pseudogene 19	6.06154	6.69266	0.631129	0.0295556
ENSG00000143570	SLC39A1	solute carrier family 39 member 1	10.9146	11.5444	0.629838	0.00540014
ENSG00000116991	SIPA1L2	signal induced proliferation associated 1 like 2	9.23999	9.86928	0.629288	0.0181012
ENSG00000230756	RHOQP3	ras homolog family member Q pseudogene 3	3.24772	3.87449	0.626761	0.0487585
ENSG00000261740	BOLA2-SMG1P6	BOLA2-SMG1P6 readthrough	7.06181	7.68704	0.625229	0.00648475
ENSG00000107833	NPM3	nucleophosmin/nucleoplasmin 3	7.16999	7.79399	0.624	0.0255358
ENSG00000112699	GMDS	GDP-mannose 4,6-dehydratase	9.55573	10.1771	0.621334	0.017166
ENSG00000068438	FTSJ1	FtsJ RNA methyltransferase homolog 1 (E. coli)	8.20738	8.82851	0.621131	0.00661783
ENSG00000160818	GPATCH4	G-patch domain containing 4	9.62348	10.2443	0.620771	0.00454533
ENSG00000120942	UBIAD1	UbiA prenyltransferase domain containing 1	8.57582	9.19427	0.618455	0.0014173
ENSG00000111845	PAK1IP1	PAK1 interacting protein 1	8.88476	9.50223	0.617466	0.00885005
ENSG00000131876	SNRPA1	small nuclear ribonucleoprotein polypeptide A	9.26458	9.88141	0.61683	0.00953429
ENSG00000171443	ZNF524	zinc finger protein 524	6.5735	7.18914	0.615637	0.0218836
ENSG00000177465	ACOT4	acyl-CoA thioesterase 4	8.44759	9.06214	0.614551	0.0161871
ENSG00000181704	YIPF6	Yip1 domain family member 6	9.11556	9.72826	0.612692	0.0202236
ENSG00000180658	OR2A4	olfactory receptor family 2 subfamily A member 4	4.62619	5.23826	0.61207	0.0269408
ENSG00000162695	SLC30A7	solute carrier family 30 member 7	10.2326	10.844	0.611345	0.00318458
ENSG00000153443	UBALD1	UBA like domain containing 1	7.48013	8.08878	0.608646	0.0231716
ENSG00000124831	LRRFIP1	LRR binding FLII interacting protein 1	11.5859	12.1935	0.607667	0.00672711
ENSG00000156500	FAM122C	family with sequence similarity 122C	4.60781	5.21458	0.606778	0.0442907
ENSG00000134686	PHC2	polyhomeotic homolog 2	11.3081	11.914	0.605917	0.0112728
ENSG00000225067	RPL23AP2	ribosomal protein L23a pseudogene 2	6.33113	6.93671	0.605585	0.00557755
ENSG00000160961	ZNF333	zinc finger protein 333	6.57502	7.17835	0.603328	0.0155094
ENSG00000114446	IFT57	intraflagellar transport 57	8.20274	8.80558	0.602838	0.0361092
ENSG00000083838	ZNF446	zinc finger protein 446	6.72989	7.32996	0.600066	0.0192206
ENSG00000107338	SHB	SH2 domain containing adaptor protein B	9.48245	10.0825	0.600046	0.01118
ENSG00000104825	NFKBIB	NFKB inhibitor beta	8.97018	9.56911	0.59893	0.00644862
ENSG00000101294	HM13	histocompatibility minor 13	11.3155	11.9137	0.59829	0.00235848
ENSG00000198680	TUSC1	tumor suppressor candidate 1	7.56947	8.16731	0.597833	0.00698306
ENSG00000132432	SEC61G	Sec61 translocon gamma subunit	9.70865	10.3063	0.597658	0.0114015
ENSG00000141026	MED9	mediator complex subunit 9	8.60969	9.20646	0.596777	0.0135776
ENSG00000236698	EIF1AXP1	eukaryotic translation initiation factor 1A, X-linked pseudogene 1	5.15335	5.74889	0.595539	0.00773041
ENSG00000185885	IFITM1	interferon induced transmembrane protein 1	10.833	11.4269	0.593902	0.0266292
ENSG00000213977	TAX1BP3	Tax1 binding protein 3	9.10284	9.69565	0.592805	0.0210554
ENSG00000225159	NPM1P39	nucleophosmin 1 pseudogene 39	3.6664	4.25913	0.592738	0.037255
ENSG00000141448	GATA6	GATA binding protein 6	8.30281	8.89333	0.590513	0.0403756
ENSG00000159079	C21orf59	chromosome 21 open reading frame 59	8.59543	9.18335	0.587924	0.0139443
ENSG00000143450	OAZ3	ornithine decarboxylase antizyme 3	5.39131	5.97799	0.586674	0.0355234
ENSG00000118939	UCHL3	ubiquitin C-terminal hydrolase L3	9.10115	9.68412	0.582968	0.00128034
ENSG00000163938	GNL3	G protein nucleolar 3	11.0273	11.61	0.582697	0.0124656
ENSG00000052795	FNIP2	folliculin interacting protein 2	10.9793	11.5615	0.582173	0.00374959
ENSG00000165271	NOL6	nucleolar protein 6	9.42481	10.0066	0.581806	0.00582542
ENSG00000163754	GYG1	glycogenin 1	9.28028	9.86024	0.579962	0.0114365
ENSG00000106803	SEC61B	Sec61 translocon beta subunit	11.1619	11.7413	0.579359	0.0106924
ENSG00000136877	FPGS	folylpolyglutamate synthase	8.83779	9.41665	0.57886	0.0406388
ENSG00000082269	FAM135A	family with sequence similarity 135 member A	8.25919	8.83771	0.57852	0.00447348
ENSG00000130810	PPAN	peter pan homolog (Drosophila)	8.30476	8.88325	0.578485	0.0136114
ENSG00000254681	PKD1P5	polycystin 1, transient receptor potential channel interacting pseudogene 5	7.0726	7.65097	0.578375	0.00841043
ENSG00000240972	MIF	macrophage migration inhibitory factor (glycosylation-inhibiting factor)	10.5831	11.1605	0.57747	0.0253579
ENSG00000204152	TIMM23B	translocase of inner mitochondrial membrane 23 homolog B	6.9813	7.55589	0.574588	0.0288289
ENSG00000178719	GRINA	glutamate ionotropic receptor NMDA type subunit associated protein 1	11.0798	11.6541	0.574295	0.0191726
ENSG00000135521	LTV1	LTV1 ribosome biogenesis factor	9.76529	10.3389	0.573627	0.00218878
ENSG00000197279	ZNF165	zinc finger protein 165	5.32621	5.89876	0.572541	0.0380631
ENSG00000154582	ELOC	elongin C	9.7652	10.3373	0.572073	0.0107803
ENSG00000169241	SLC50A1	solute carrier family 50 member 1	9.46706	10.0388	0.571758	0.0164854
ENSG00000182810	DDX28	DEAD-box helicase 28	7.84336	8.41473	0.57137	0.00682217
ENSG00000183527	PSMG1	proteasome assembly chaperone 1	9.54643	10.1175	0.571041	0.00276954
ENSG00000244693	CTAGE8	CTAGE family member 8	7.13855	7.70934	0.57079	0.0360301
ENSG00000103005	USB1	U6 snRNA biogenesis phosphodiesterase 1	9.55929	10.1288	0.569525	0.00526791
ENSG00000164182	NDUFAF2	NADH:ubiquinone oxidoreductase complex assembly factor 2	8.532	9.10146	0.569458	0.00235972
ENSG00000170631	ZNF16	zinc finger protein 16	6.5441	7.11238	0.568278	0.00560894
ENSG00000134809	TIMM10	translocase of inner mitochondrial membrane 10	8.28524	8.85339	0.568152	0.0147442
ENSG00000074219	TEAD2	TEA domain transcription factor 2	8.69876	9.26584	0.567084	0.0445567
ENSG00000205730	ITPRIPL2	inositol 1,4,5-trisphosphate receptor interacting protein like 2	9.53181	10.0987	0.566895	0.0127677
ENSG00000134539	KLRD1	killer cell lectin like receptor D1	4.73017	5.29682	0.566652	0.0399283
ENSG00000106077	ABHD11	abhydrolase domain containing 11	6.44282	7.0091	0.56628	0.0154628
ENSG00000072310	SREBF1	sterol regulatory element binding transcription factor 1	10.577	11.1423	0.565334	0.0422108
ENSG00000166913	YWHAB	tyrosine 3-monooxygenase/tryptophan 5-monooxygenase activation protein beta	10.4895	11.0545	0.565011	0.0115827
ENSG00000164163	ABCE1	ATP binding cassette subfamily E member 1	10.9956	11.5603	0.564734	0.0140936
ENSG00000234498	RPL13AP20	ribosomal protein L13a pseudogene 20	5.54951	6.11398	0.564463	0.0280598
ENSG00000119650	IFT43	intraflagellar transport 43	8.845	9.40907	0.56407	0.0300643
ENSG00000168140	VASN	vasorin	8.71368	9.2772	0.56352	0.00735806
ENSG00000108176	DNAJC12	DnaJ heat shock protein family (Hsp40) member C12	9.90525	10.4686	0.563316	0.0331808
ENSG00000105136	ZNF419	zinc finger protein 419	6.23831	6.80035	0.56204	0.023501
ENSG00000228929	RPS13P2	ribosomal protein S13 pseudogene 2	5.84105	6.40238	0.561333	0.0150832
ENSG00000213553	RPLP0P6	ribosomal protein lateral stalk subunit P0 pseudogene 6	9.50103	10.0617	0.560689	0.00503326
ENSG00000178381	ZFAND2A	zinc finger AN1-type containing 2A	9.18324	9.74379	0.560549	0.0317595
ENSG00000185485	SDHAP1	succinate dehydrogenase complex flavoprotein subunit A pseudogene 1	8.04733	8.60785	0.560519	0.00569398
ENSG00000226525	RPS7P10	ribosomal protein S7 pseudogene 10	5.28503	5.84506	0.560032	0.0361019
ENSG00000132661	NXT1	nuclear transport factor 2 like export factor 1	7.4132	7.97295	0.559742	0.0146284
ENSG00000185201	IFITM2	interferon induced transmembrane protein 2	12.2022	12.7611	0.558894	0.0197136
ENSG00000083937	CHMP2B	charged multivesicular body protein 2B	9.60895	10.1665	0.557597	0.04595
ENSG00000105717	PBX4	PBX homeobox 4	1.77537	2.33288	0.557508	0.0389867
ENSG00000198053	SIRPA	signal regulatory protein alpha	11.3208	11.8779	0.557049	0.0165492
ENSG00000283498	MIR1244-2	microRNA 1244-2	7.78308	8.34001	0.556936	0.0204112
ENSG00000128918	ALDH1A2	aldehyde dehydrogenase 1 family member A2	7.51028	8.06621	0.555934	0.0216674
ENSG00000157557	ETS2	ETS proto-oncogene 2, transcription factor	12.7782	13.3338	0.555676	0.0220337
ENSG00000116649	SRM	spermidine synthase	9.43149	9.98681	0.555325	0.00536938
ENSG00000196449	YRDC	yrdC N6-threonylcarbamoyltransferase domain containing	8.15441	8.70964	0.555229	0.0101134
ENSG00000070423	RNF126	ring finger protein 126	8.34631	8.90126	0.554951	0.0095236
ENSG00000178896	EXOSC4	exosome component 4	7.13215	7.68638	0.554234	0.0072014
ENSG00000217027	TPT1P4	tumor protein, translationally-controlled 1 pseudogene 4	6.29199	6.84512	0.553134	0.0454177
ENSG00000102390	PBDC1	polysaccharide biosynthesis domain containing 1	9.01676	9.56981	0.55305	0.00428323
ENSG00000187514	PTMA	prothymosin, alpha	13.2467	13.7967	0.550023	0.006219
ENSG00000231167	YBX1P2	Y-box binding protein 1 pseudogene 2	4.97798	5.5275	0.549528	0.02315
ENSG00000158483	FAM86C1	family with sequence similarity 86 member C1	6.35516	6.90442	0.549263	0.0201948
ENSG00000077150	NFKB2	nuclear factor kappa B subunit 2	9.5122	10.0605	0.54826	0.0352243
ENSG00000198324	FAM109A	family with sequence similarity 109 member A	7.91659	8.46436	0.547764	0.0447673
ENSG00000174109	C16orf91	chromosome 16 open reading frame 91	7.06582	7.61314	0.547317	0.0250749
ENSG00000184897	H1FX	H1 histone family member X	9.39215	9.93932	0.547176	0.0204589
ENSG00000142684	ZNF593	zinc finger protein 593	7.75176	8.29815	0.546396	0.0219666
ENSG00000183578	TNFAIP8L3	TNF alpha induced protein 8 like 3	6.82572	7.37182	0.546103	0.0345009
ENSG00000185043	CIB1	calcium and integrin binding 1	10.7099	11.2558	0.545954	0.00569466
ENSG00000149798	CDC42EP2	CDC42 effector protein 2	6.61225	7.15798	0.54573	0.0433619
ENSG00000171914	TLN2	talin 2	7.05772	7.60204	0.544313	0.0495235
ENSG00000100226	GTPBP1	GTP binding protein 1	9.04708	9.59135	0.544266	0.0178267
ENSG00000105355	PLIN3	perilipin 3	9.29876	9.84202	0.543263	0.0223702
ENSG00000182944	EWSR1	EWS RNA binding protein 1	11.6289	12.1716	0.542635	0.00138124
ENSG00000134480	CCNH	cyclin H	9.47579	10.0182	0.542432	0.0127699
ENSG00000246067	RAB30-AS1	RAB30 antisense RNA 1 (head to head)	5.75619	6.2983	0.542111	0.0167793
ENSG00000170791	CHCHD7	coiled-coil-helix-coiled-coil-helix domain containing 7	8.35614	8.89704	0.540901	0.0377474
ENSG00000136536	2020-03-07	membrane associated ring-CH-type finger 7	10.4886	11.0277	0.539058	0.0274639
ENSG00000162543	UBXN10	UBX domain protein 10	7.36694	7.90568	0.538738	0.0249479
ENSG00000229132	EIF4A1P10	eukaryotic translation initiation factor 4A1 pseudogene 10	6.44479	6.98337	0.538585	0.0462385
ENSG00000155287	SLC25A28	solute carrier family 25 member 28	9.41123	9.94963	0.5384	0.00361449
ENSG00000198535	C2CD4A	C2 calcium dependent domain containing 4A	4.47152	5.00735	0.535831	0.0440137
ENSG00000239797	RPL21P39	ribosomal protein L21 pseudogene 39	4.76792	5.30358	0.535663	0.0354143
ENSG00000211891	IGHE	immunoglobulin heavy constant epsilon	3.63302	4.1685	0.53548	0.0173077
ENSG00000142089	IFITM3	interferon induced transmembrane protein 3	13.8874	14.4177	0.530247	0.0171427
ENSG00000197744	PTMAP2	prothymosin, alpha pseudogene 2	6.64851	7.17748	0.528975	0.0276511
ENSG00000177192	PUS1	pseudouridylate synthase 1	8.4686	8.99734	0.528747	0.0305715
ENSG00000130826	DKC1	dyskerin pseudouridine synthase 1	9.36406	9.89214	0.528076	0.0117521
ENSG00000169976	SF3B5	splicing factor 3b subunit 5	10.0428	10.5703	0.527544	0.00884313
ENSG00000128534	LSM8	LSM8 homolog, U6 small nuclear RNA associated	8.63385	9.15961	0.525768	0.0314751
ENSG00000124615	MOCS1	molybdenum cofactor synthesis 1	9.64361	10.1691	0.52545	0.00113428
ENSG00000140650	PMM2	phosphomannomutase 2	10.3191	10.8445	0.525443	0.0293024
ENSG00000229036	VDAC1P8	voltage dependent anion channel 1 pseudogene 8	5.02401	5.54918	0.525172	0.0331674
ENSG00000152359	POC5	POC5 centriolar protein	6.83359	7.35782	0.524227	0.045963
ENSG00000144867	SRPRB	SRP receptor beta subunit	11.0183	11.541	0.522728	0.0159715
ENSG00000112081	SRSF3	serine and arginine rich splicing factor 3	11.0078	11.5301	0.522291	0.0168318
ENSG00000070444	MNT	MAX network transcriptional repressor	7.57352	8.09487	0.521352	0.00983813
ENSG00000186222	BLOC1S4	biogenesis of lysosomal organelles complex 1 subunit 4	7.07369	7.59445	0.520761	0.00514671
ENSG00000051596	THOC3	THO complex 3	8.75659	9.27674	0.520144	0.00439342
ENSG00000111906	HDDC2	HD domain containing 2	7.98651	8.50633	0.519818	0.0446
ENSG00000125538	IL1B	interleukin 1 beta	6.32414	6.84393	0.519788	0.0371787
ENSG00000249353	NPM1P27	nucleophosmin 1 pseudogene 27	8.0446	8.56416	0.51956	0.0160784
ENSG00000128595	CALU	calumenin	11.1704	11.6897	0.519309	0.0263778
ENSG00000128283	CDC42EP1	CDC42 effector protein 1	10.0664	10.5856	0.519201	0.031848
ENSG00000189306	RRP7A	ribosomal RNA processing 7 homolog A	9.27353	9.79087	0.517335	0.0249538
ENSG00000100029	PES1	pescadillo ribosomal biogenesis factor 1	9.91769	10.4345	0.516855	0.00993894
ENSG00000205571	SMN2	survival of motor neuron 2, centromeric	8.94812	9.46365	0.515532	0.0324716
ENSG00000105185	PDCD5	programmed cell death 5	9.74871	10.2635	0.514764	0.0137423
ENSG00000003436	TFPI	tissue factor pathway inhibitor	12.391	12.9056	0.514631	0.0248672
ENSG00000146457	WTAP	WT1 associated protein	10.5679	11.0824	0.514516	0.00925345
ENSG00000158859	ADAMTS4	ADAM metallopeptidase with thrombospondin type 1 motif 4	7.77536	8.28703	0.511669	0.0496727
ENSG00000173465	SSSCA1	Sjogren syndrome/scleroderma autoantigen 1	7.15367	7.66521	0.511535	0.0379143
ENSG00000168003	SLC3A2	solute carrier family 3 member 2	10.3322	10.8437	0.511441	0.0274659
ENSG00000186575	NF2	neurofibromin 2	8.58992	9.10063	0.510714	0.0416428
ENSG00000260565	ERVK13-1	endogenous retrovirus group K13 member 1	7.47232	7.98264	0.510321	0.0205879
ENSG00000163660	CCNL1	cyclin L1	10.2324	10.7415	0.509059	0.0287338
ENSG00000160345	C9orf116	chromosome 9 open reading frame 116	4.59814	5.1069	0.508759	0.0448704
ENSG00000140988	RPS2	ribosomal protein S2	13.3863	13.8944	0.50809	0.012567
ENSG00000105677	TMEM147	transmembrane protein 147	9.19611	9.70252	0.506409	0.000650318
ENSG00000152413	HOMER1	homer scaffolding protein 1	5.7323	6.23831	0.506014	0.0396973
ENSG00000100056	ESS2	ess-2 splicing factor homolog	7.37141	7.87686	0.505444	0.00732252
ENSG00000160256	FAM207A	family with sequence similarity 207 member A	7.65481	8.15939	0.504586	0.00694361
ENSG00000147231	CXorf57	chromosome X open reading frame 57	5.95514	6.45885	0.503716	0.0476476
ENSG00000183684	ALYREF	Aly/REF export factor	8.27753	8.78028	0.502746	0.0486882
ENSG00000162298	SYVN1	synoviolin 1	10.877	11.3793	0.502264	0.0339457
ENSG00000175416	CLTB	clathrin light chain B	9.47342	9.9745	0.501076	0.008815
ENSG00000118894	EEF2KMT	eukaryotic elongation factor 2 lysine methyltransferase	8.08542	8.58596	0.500542	0.00723576
ENSG00000100139	MICALL1	MICAL like 1	8.00182	8.50231	0.500498	0.0366323
ENSG00000164916	FOXK1	forkhead box K1	7.94414	8.44432	0.500181	0.0475168
ENSG00000205269	TMEM170B	transmembrane protein 170B	9.28803	8.78604	-0.501985	0.0201159
ENSG00000113318	MSH3	mutS homolog 3	8.90812	8.40528	-0.502846	0.00609603
ENSG00000204371	EHMT2	euchromatic histone lysine methyltransferase 2	9.10865	8.60577	-0.50288	0.0114784
ENSG00000204569	PPP1R10	protein phosphatase 1 regulatory subunit 10	10.3499	9.84685	-0.503064	0.0309628
ENSG00000109436	TBC1D9	TBC1 domain family member 9	9.88567	9.38112	-0.504543	0.00113682
ENSG00000198919	DZIP3	DAZ interacting zinc finger protein 3	7.84035	7.33457	-0.505781	0.0416744
ENSG00000141664	ZCCHC2	zinc finger CCHC-type containing 2	9.97595	9.47009	-0.505857	0.029434
ENSG00000167232	ZNF91	zinc finger protein 91	9.09655	8.58992	-0.506623	0.00535182
ENSG00000171428	NAT1	N-acetyltransferase 1	7.84951	7.33906	-0.510455	0.0398105
ENSG00000134186	PRPF38B	pre-mRNA processing factor 38B	9.81188	9.30084	-0.51104	0.0186809
ENSG00000138688	KIAA1109	KIAA1109	11.2649	10.7533	-0.511563	0.0264948
ENSG00000186088	GSAP	gamma-secretase activating protein	9.46871	8.95618	-0.512525	0.00274782
ENSG00000100075	SLC25A1	solute carrier family 25 member 1	10.7108	10.197	-0.513813	0.040592
ENSG00000044090	CUL7	cullin 7	8.86532	8.35092	-0.5144	0.0410436
ENSG00000109756	RAPGEF2	Rap guanine nucleotide exchange factor 2	10.7842	10.2667	-0.517483	0.0365799
ENSG00000088179	PTPN4	protein tyrosine phosphatase, non-receptor type 4	8.94375	8.4252	-0.518548	0.00110063
ENSG00000134882	UBAC2	UBA domain containing 2	9.80765	9.28896	-0.518693	0.0229723
ENSG00000184083	FAM120C	family with sequence similarity 120C	7.74881	7.22995	-0.518865	0.00673866
ENSG00000130052	STARD8	StAR related lipid transfer domain containing 8	8.96957	8.45051	-0.519068	0.0200862
ENSG00000155962	CLIC2	chloride intracellular channel 2	9.03311	8.51268	-0.520423	0.0410645
ENSG00000162927	PUS10	pseudouridylate synthase 10	8.92074	8.39761	-0.523125	0.0168462
ENSG00000107897	ACBD5	acyl-CoA binding domain containing 5	11.0349	10.5105	-0.5244	0.033359
ENSG00000181104	F2R	coagulation factor II thrombin receptor	9.92026	9.39536	-0.524897	0.0360637
ENSG00000134215	VAV3	vav guanine nucleotide exchange factor 3	7.64856	7.12357	-0.524985	0.0493123
ENSG00000025434	NR1H3	nuclear receptor subfamily 1 group H member 3	9.7556	9.22661	-0.528991	0.026582
ENSG00000155465	SLC7A7	solute carrier family 7 member 7	8.74313	8.21317	-0.529964	0.0194
ENSG00000116117	PARD3B	par-3 family cell polarity regulator beta	8.60094	8.06539	-0.535551	0.0346236
ENSG00000007312	CD79B	CD79b molecule	6.74929	6.21257	-0.536718	0.0302636
ENSG00000188801	ZNF322P1	zinc finger protein 322 pseudogene 1	6.14883	5.61055	-0.538279	0.0389445
ENSG00000119471	HSDL2	hydroxysteroid dehydrogenase like 2	12.4634	11.9225	-0.540969	0.0251458
ENSG00000171408	PDE7B	phosphodiesterase 7B	7.47893	6.93784	-0.541089	0.0289231
ENSG00000060982	BCAT1	branched chain amino acid transaminase 1	7.30799	6.76647	-0.541519	0.0442835
ENSG00000251322	SHANK3	SH3 and multiple ankyrin repeat domains 3	9.17219	8.62988	-0.542314	0.0162707
ENSG00000136111	TBC1D4	TBC1 domain family member 4	9.95667	9.41433	-0.542333	0.0173524
ENSG00000087301	TXNDC16	thioredoxin domain containing 16	7.98688	7.44293	-0.543951	0.0484468
ENSG00000136783	NIPSNAP3A	nipsnap homolog 3A	9.72685	9.1829	-0.543952	0.0162504
ENSG00000198734	F5	coagulation factor V	13.3114	12.7674	-0.544076	0.0254631
ENSG00000105810	CDK6	cyclin dependent kinase 6	9.89703	9.35119	-0.545839	0.00133224
ENSG00000175866	BAIAP2	BAI1 associated protein 2	9.7901	9.2441	-0.546004	0.0104201
ENSG00000153721	CNKSR3	CNKSR family member 3	10.254	9.7078	-0.546173	0.0478226
ENSG00000263001	GTF2I	general transcription factor IIi	11.4205	10.8711	-0.549411	0.0142728
ENSG00000263740	RN7SL4P	RNA, 7SL, cytoplasmic 4, pseudogene	7.1339	6.58295	-0.550947	0.00545932
ENSG00000198182	ZNF607	zinc finger protein 607	5.85649	5.3014	-0.555089	0.0383508
ENSG00000064989	CALCRL	calcitonin receptor like receptor	9.62221	9.06677	-0.555446	0.0236979
ENSG00000173041	ZNF680	zinc finger protein 680	8.87552	8.3199	-0.555617	0.00487619
ENSG00000142065	ZFP14	ZFP14 zinc finger protein	7.37084	6.81498	-0.555866	0.0178172
ENSG00000105829	BET1	Bet1 golgi vesicular membrane trafficking protein	9.21779	8.66164	-0.556146	0.0490497
ENSG00000125166	GOT2	glutamic-oxaloacetic transaminase 2	13.0315	12.4736	-0.55791	0.0238897
ENSG00000122642	FKBP9	FK506 binding protein 9	10.241	9.68261	-0.558352	0.00448406
ENSG00000010292	NCAPD2	non-SMC condensin I complex subunit D2	9.01282	8.45414	-0.558674	0.0104645
ENSG00000166881	NEMP1	nuclear envelope integral membrane protein 1	8.74073	8.18177	-0.558958	0.0290576
ENSG00000167106	FAM102A	family with sequence similarity 102 member A	9.18499	8.62542	-0.559574	0.0384397
ENSG00000171681	ATF7IP	activating transcription factor 7 interacting protein	9.93102	9.37089	-0.560136	0.00482549
ENSG00000136854	STXBP1	syntaxin binding protein 1	8.33011	7.76808	-0.56203	0.0136746
ENSG00000163564	PYHIN1	pyrin and HIN domain family member 1	5.91511	5.35168	-0.563426	0.0437543
ENSG00000166126	AMN	amnion associated transmembrane protein	6.63421	6.07068	-0.563526	0.0474734
ENSG00000137145	DENND4C	DENN domain containing 4C	10.1363	9.57216	-0.56409	0.00641438
ENSG00000160233	LRRC3	leucine rich repeat containing 3	9.33601	8.77127	-0.564734	0.0369438
ENSG00000153002	CPB1	carboxypeptidase B1	3.24352	2.67869	-0.564825	0.0495068
ENSG00000198951	NAGA	alpha-N-acetylgalactosaminidase	9.98278	9.4176	-0.565181	0.0099132
ENSG00000171848	RRM2	ribonucleotide reductase regulatory subunit M2	5.88278	5.31662	-0.566163	0.00439865
ENSG00000146733	PSPH	phosphoserine phosphatase	8.36903	7.80036	-0.568673	0.0295223
ENSG00000172716	SLFN11	schlafen family member 11	8.78209	8.21289	-0.569203	0.0231458
ENSG00000152078	TMEM56	transmembrane protein 56	12.2114	11.6412	-0.570191	0.0397857
ENSG00000132849	PATJ	PATJ, crumbs cell polarity complex component	10.3087	9.73848	-0.570264	0.0171248
ENSG00000174718	KIAA1551	KIAA1551	11.3242	10.7537	-0.570515	0.039525
ENSG00000197563	PIGN	phosphatidylinositol glycan anchor biosynthesis class N	8.88122	8.31065	-0.570577	0.0271613
ENSG00000103876	FAH	fumarylacetoacetate hydrolase	11.68	11.1088	-0.571204	0.0233757
ENSG00000185527	PDE6G	phosphodiesterase 6G	4.38683	3.81417	-0.572659	0.035647
ENSG00000035862	TIMP2	TIMP metallopeptidase inhibitor 2	11.4704	10.8975	-0.572927	0.0498464
ENSG00000163069	SGCB	sarcoglycan beta	9.44343	8.87027	-0.57316	0.0107651
ENSG00000170921	TANC2	tetratricopeptide repeat, ankyrin repeat and coiled-coil containing 2	7.63756	7.06327	-0.574284	0.02005
ENSG00000134769	DTNA	dystrobrevin alpha	6.56874	5.99219	-0.576549	0.0430687
ENSG00000198478	SH3BGRL2	SH3 domain binding glutamate rich protein like 2	11.2389	10.6614	-0.577488	0.0328165
ENSG00000168067	MAP4K2	mitogen-activated protein kinase kinase kinase kinase 2	7.57642	6.99817	-0.578253	0.0473162
ENSG00000244682	FCGR2C	Fc fragment of IgG receptor IIc (gene/pseudogene)	7.88234	7.30384	-0.578507	0.0368657
ENSG00000145014	TMEM44	transmembrane protein 44	6.82551	6.24416	-0.581349	0.00676908
ENSG00000091262	ABCC6	ATP binding cassette subfamily C member 6	10.9686	10.3831	-0.585519	0.0280667
ENSG00000167720	SRR	serine racemase	7.55701	6.97115	-0.585854	0.0166865
ENSG00000134504	KCTD1	potassium channel tetramerization domain containing 1	6.65582	6.0685	-0.587323	0.0415048
ENSG00000102699	PARP4	poly(ADP-ribose) polymerase family member 4	11.1889	10.601	-0.587924	0.0102982
ENSG00000123352	SPATS2	spermatogenesis associated serine rich 2	8.16359	7.57394	-0.589642	0.0121857
ENSG00000126070	AGO3	argonaute 3, RISC catalytic component	9.28555	8.69544	-0.590109	0.0463853
ENSG00000144834	TAGLN3	transgelin 3	1.11034	0.517979	-0.59236	0.0322054
ENSG00000163686	ABHD6	abhydrolase domain containing 6	10.0877	9.49503	-0.592688	0.00621586
ENSG00000126785	RHOJ	ras homolog family member J	8.20113	7.60785	-0.593289	0.00995037
ENSG00000181031	RPH3AL	rabphilin 3A like (without C2 domains)	8.15312	7.55712	-0.595996	0.0133838
ENSG00000081177	EXD2	exonuclease 3-5 domain containing 2	9.15829	8.56096	-0.597329	0.0129292
ENSG00000114770	ABCC5	ATP binding cassette subfamily C member 5	9.09429	8.4943	-0.59999	0.041718
ENSG00000169435	RASSF6	Ras association domain family member 6	6.20266	5.6021	-0.600568	0.0476659
ENSG00000100665	SERPINA4	serpin family A member 4	11.9164	11.3144	-0.601945	0.0192218
ENSG00000137338	PGBD1	piggyBac transposable element derived 1	6.95565	6.35362	-0.602031	0.000617823
ENSG00000213235	EEF1A1P16	eukaryotic translation elongation factor 1 alpha 1 pseudogene 16	2.96627	2.35938	-0.606889	0.0167691
ENSG00000131095	GFAP	glial fibrillary acidic protein	6.72984	6.12239	-0.607446	0.0141387
ENSG00000164109	MAD2L1	mitotic arrest deficient 2 like 1	5.84201	5.23434	-0.607678	0.0494899
ENSG00000103811	CTSH	cathepsin H	11.2821	10.6733	-0.608826	0.00903124
ENSG00000116106	EPHA4	EPH receptor A4	6.90467	6.29582	-0.608847	0.0240073
ENSG00000102781	KATNAL1	katanin catalytic subunit A1 like 1	9.08232	8.47244	-0.609877	0.0109383
ENSG00000111816	FRK	fyn related Src family tyrosine kinase	10.2143	9.60228	-0.612061	0.00626638
ENSG00000120156	TEK	TEK receptor tyrosine kinase	9.49724	8.88146	-0.615782	0.0194506
ENSG00000160199	PKNOX1	PBX/knotted 1 homeobox 1	8.59059	7.97432	-0.616275	0.0324462
ENSG00000088926	F11	coagulation factor XI	12.5095	11.8922	-0.617342	0.0311368
ENSG00000224373	IGHV4-59	immunoglobulin heavy variable 4-59	8.50086	7.88285	-0.618014	0.0364726
ENSG00000006715	VPS41	VPS41, HOPS complex subunit	10.2701	9.6508	-0.619301	0.000187952
ENSG00000167632	TRAPPC9	trafficking protein particle complex 9	8.26389	7.64449	-0.619399	0.000692991
ENSG00000138468	SENP7	SUMO1/sentrin specific peptidase 7	8.77324	8.15117	-0.622066	0.0128679
ENSG00000128607	KLHDC10	kelch domain containing 10	10.7499	10.1277	-0.622239	0.0177493
ENSG00000073464	CLCN4	chloride voltage-gated channel 4	8.47444	7.85191	-0.622531	0.00332132
ENSG00000010327	STAB1	stabilin 1	11.42	10.7964	-0.623647	0.0137399
ENSG00000085662	AKR1B1	aldo-keto reductase family 1 member B	8.90572	8.28109	-0.624629	0.00302168
ENSG00000250387	LINC02197	long intergenic non-protein coding RNA 2197	6.92911	6.30308	-0.626038	0.0463031
ENSG00000203965	EFCAB7	EF-hand calcium binding domain 7	6.7184	6.09214	-0.626262	0.0190287
ENSG00000134324	LPIN1	lipin 1	10.94	10.312	-0.627997	0.00576901
ENSG00000218510	LINC00339	long intergenic non-protein coding RNA 339	6.99718	6.367	-0.630177	0.0316555
ENSG00000125354	2020-09-06	septin 6	9.995	9.36428	-0.630724	0.00289513
ENSG00000061938	TNK2	tyrosine kinase non receptor 2	9.29538	8.66187	-0.633506	0.0155726
ENSG00000135686	KLHL36	kelch like family member 36	9.3224	8.68812	-0.634284	0.0451041
ENSG00000182600	C2orf82	chromosome 2 open reading frame 82	6.08213	5.44777	-0.634351	0.0418993
ENSG00000114013	CD86	CD86 molecule	8.2931	7.65835	-0.634749	0.030093
ENSG00000087299	L2HGDH	L-2-hydroxyglutarate dehydrogenase	8.87852	8.24286	-0.635661	0.0367857
ENSG00000132846	ZBED3	zinc finger BED-type containing 3	9.64312	9.00634	-0.636788	0.0150536
ENSG00000173083	HPSE	heparanase	7.41835	6.78138	-0.636972	0.035201
ENSG00000173890	GPR160	G protein-coupled receptor 160	6.84648	6.20889	-0.637584	0.0251631
ENSG00000196743	GM2A	GM2 ganglioside activator	10.2715	9.63387	-0.637658	0.00715175
ENSG00000122986	HVCN1	hydrogen voltage gated channel 1	6.93712	6.29811	-0.63901	0.0486407
ENSG00000235314	LINC00957	long intergenic non-protein coding RNA 957	5.86325	5.22424	-0.639012	0.0482355
ENSG00000072736	NFATC3	nuclear factor of activated T-cells 3	9.66827	9.02896	-0.639311	0.00907552
ENSG00000005882	PDK2	pyruvate dehydrogenase kinase 2	8.60178	7.96178	-0.640004	0.0109114
ENSG00000079459	FDFT1	farnesyl-diphosphate farnesyltransferase 1	11.401	10.7593	-0.641721	0.00677605
ENSG00000109323	MANBA	mannosidase beta	9.53787	8.89614	-0.641734	0.0417277
ENSG00000122778	KIAA1549	KIAA1549	6.86515	6.22251	-0.642639	0.0233089
ENSG00000178445	GLDC	glycine decarboxylase	11.969	11.3258	-0.643182	0.0117358
ENSG00000197008	ZNF138	zinc finger protein 138	6.92741	6.28368	-0.643724	0.0292733
ENSG00000101096	NFATC2	nuclear factor of activated T-cells 2	8.67341	8.02947	-0.643939	0.033017
ENSG00000178104	PDE4DIP	phosphodiesterase 4D interacting protein	11.4178	10.7728	-0.644973	0.00480056
ENSG00000137642	SORL1	sortilin related receptor 1	11.6688	11.0224	-0.646413	0.00630337
ENSG00000119927	GPAM	glycerol-3-phosphate acyltransferase, mitochondrial	12.5556	11.9089	-0.646665	0.0354714
ENSG00000132879	FBXO44	F-box protein 44	7.90282	7.25391	-0.648903	0.0442978
ENSG00000102897	LYRM1	LYR motif containing 1	9.77058	9.1197	-0.650875	0.00533048
ENSG00000133943	C14orf159	chromosome 14 open reading frame 159	9.27406	8.62272	-0.651341	0.00361516
ENSG00000101417	PXMP4	peroxisomal membrane protein 4	8.55402	7.90251	-0.651509	0.00972477
ENSG00000110243	APOA5	apolipoprotein A5	11.6525	11.0008	-0.65173	0.00735335
ENSG00000198270	TMEM116	transmembrane protein 116	7.93437	7.28167	-0.652703	0.0225591
ENSG00000152926	ZNF117	zinc finger protein 117	8.14739	7.493	-0.654394	0.042429
ENSG00000064115	TM7SF3	transmembrane 7 superfamily member 3	10.5944	9.93962	-0.654748	0.00522033
ENSG00000040933	INPP4A	inositol polyphosphate-4-phosphatase type I A	8.45196	7.79678	-0.655187	0.0102519
ENSG00000276409	CCL14	C-C motif chemokine ligand 14	9.89684	9.24055	-0.656298	0.0239214
ENSG00000084754	HADHA	hydroxyacyl-CoA dehydrogenase/3-ketoacyl-CoA thiolase/enoyl-CoA hydratase (trifunctional protein), alpha subunit	13.2513	12.5923	-0.659037	0.00299873
ENSG00000138764	CCNG2	cyclin G2	8.53429	7.87419	-0.660096	0.0457236
ENSG00000106560	GIMAP2	GTPase, IMAP family member 2	8.59015	7.92957	-0.66058	0.0254021
ENSG00000145555	MYO10	myosin X	9.69087	9.0299	-0.660971	0.000799256
ENSG00000228716	DHFR	dihydrofolate reductase	10.1325	9.4712	-0.661301	0.0125961
ENSG00000125246	CLYBL	citrate lyase beta like	9.73176	9.0688	-0.662957	0.0482283
ENSG00000106780	MEGF9	multiple EGF like domains 9	11.7577	11.0938	-0.663878	0.0137126
ENSG00000170917	NUDT6	nudix hydrolase 6	7.76561	7.10094	-0.664669	0.0202433
ENSG00000112992	NNT	nicotinamide nucleotide transhydrogenase	12.7291	12.0629	-0.666249	0.0297217
ENSG00000226137	BAIAP2-AS1	BAIAP2 antisense RNA 1 (head to head)	9.15902	8.48346	-0.675552	0.0460536
ENSG00000122378	FAM213A	family with sequence similarity 213 member A	11.6442	10.968	-0.676184	0.00462379
ENSG00000198265	HELZ	helicase with zinc finger	10.6168	9.93971	-0.677113	0.0167572
ENSG00000112294	ALDH5A1	aldehyde dehydrogenase 5 family member A1	11.7767	11.0991	-0.677643	0.0210872
ENSG00000158089	GALNT14	polypeptide N-acetylgalactosaminyltransferase 14	5.81637	5.13496	-0.681411	0.0222207
ENSG00000111206	FOXM1	forkhead box M1	5.41565	4.73408	-0.681572	0.0218562
ENSG00000213203	GIMAP1	GTPase, IMAP family member 1	8.29666	7.61377	-0.682889	0.0140266
ENSG00000134897	BIVM	basic, immunoglobulin-like variable motif containing	9.26651	8.58143	-0.685079	0.00378457
ENSG00000133800	LYVE1	lymphatic vessel endothelial hyaluronan receptor 1	11.8316	11.1456	-0.686006	0.037044
ENSG00000146386	ABRACL	ABRA C-terminal like	9.85504	9.16901	-0.686036	0.032186
ENSG00000144908	ALDH1L1	aldehyde dehydrogenase 1 family member L1	11.6689	10.9825	-0.686401	0.0385022
ENSG00000187091	PLCD1	phospholipase C delta 1	8.09883	7.40847	-0.690359	0.00172661
ENSG00000187942	LDLRAD2	low density lipoprotein receptor class A domain containing 2	2.71312	2.02249	-0.69063	0.00712061
ENSG00000111335	OAS2	2-5-oligoadenylate synthetase 2	9.79781	9.10584	-0.691968	0.0106442
ENSG00000109929	SC5D	sterol-C5-desaturase	12.3521	11.6572	-0.694899	0.0198413
ENSG00000162618	ADGRL4	adhesion G protein-coupled receptor L4	10.2599	9.56468	-0.6952	0.00756847
ENSG00000127329	PTPRB	protein tyrosine phosphatase, receptor type B	10.9963	10.2996	-0.696686	0.0268626
ENSG00000126860	EVI2A	ecotropic viral integration site 2A	7.99924	7.30252	-0.696712	0.016093
ENSG00000182566	CLEC4G	C-type lectin domain family 4 member G	10.1297	9.43237	-0.697284	0.00637463
ENSG00000107186	MPDZ	multiple PDZ domain crumbs cell polarity complex component	10.9822	10.2825	-0.699631	0.0375033
ENSG00000059588	TARBP1	TAR (HIV-1) RNA binding protein 1	8.91974	8.21938	-0.700359	0.00780141
ENSG00000158813	EDA	ectodysplasin A	6.91613	6.21536	-0.700768	0.0152999
ENSG00000204947	ZNF425	zinc finger protein 425	5.5228	4.82135	-0.701452	0.0401148
ENSG00000135437	RDH5	retinol dehydrogenase 5	7.58961	6.88809	-0.701514	0.00383963
ENSG00000135828	RNASEL	ribonuclease L	7.94043	7.23888	-0.701555	0.0239484
ENSG00000160867	FGFR4	fibroblast growth factor receptor 4	10.1068	9.40124	-0.705571	0.0180594
ENSG00000164220	F2RL2	coagulation factor II thrombin receptor like 2	6.73924	6.03053	-0.708711	0.0158389
ENSG00000065833	ME1	malic enzyme 1	10.0561	9.34612	-0.709999	0.0417233
ENSG00000119782	FKBP1B	FK506 binding protein 1B	6.54285	5.83252	-0.71033	0.0422634
ENSG00000143110	C1orf162	chromosome 1 open reading frame 162	9.35544	8.64433	-0.711115	0.0205709
ENSG00000173166	RAPH1	Ras association (RalGDS/AF-6) and pleckstrin homology domains 1	8.71431	8.00294	-0.711379	0.0466851
ENSG00000153982	GDPD1	glycerophosphodiester phosphodiesterase domain containing 1	5.19071	4.47839	-0.712323	0.0155977
ENSG00000118308	LRMP	lymphoid restricted membrane protein	7.39005	6.67757	-0.712486	0.0243879
ENSG00000157322	CLEC18A	C-type lectin domain family 18 member A	3.39385	2.67924	-0.714613	0.0458921
ENSG00000083814	ZNF671	zinc finger protein 671	6.38964	5.67503	-0.714615	0.00503463
ENSG00000107798	LIPA	lipase A, lysosomal acid type	12.6169	11.9021	-0.714873	0.0238048
ENSG00000144445	KANSL1L	KAT8 regulatory NSL complex subunit 1 like	9.20358	8.48845	-0.715131	0.014671
ENSG00000150625	GPM6A	glycoprotein M6A	8.37351	7.65814	-0.715375	0.0251503
ENSG00000162981	FAM84A	family with sequence similarity 84 member A	7.12612	6.41056	-0.715564	0.0320277
ENSG00000178821	TMEM52	transmembrane protein 52	5.73459	5.0182	-0.716384	0.0335924
ENSG00000211934	IGHV1-2	immunoglobulin heavy variable 1-2	5.73589	5.01874	-0.717145	0.0161432
ENSG00000186642	PDE2A	phosphodiesterase 2A	9.54334	8.82389	-0.719451	0.0213317
ENSG00000172578	KLHL6	kelch like family member 6	7.45584	6.73587	-0.719975	0.0367902
ENSG00000156869	FRRS1	ferric chelate reductase 1	9.04058	8.32053	-0.720049	0.0100581
ENSG00000073605	GSDMB	gasdermin B	8.30176	7.58125	-0.720513	0.0428881
ENSG00000233381	AK4P3	adenylate kinase 4 pseudogene 3	5.36514	4.64298	-0.722155	0.0284753
ENSG00000141682	PMAIP1	phorbol-12-myristate-13-acetate-induced protein 1	5.06189	4.3397	-0.722187	0.0447523
ENSG00000122254	HS3ST2	heparan sulfate-glucosamine 3-sulfotransferase 2	3.49128	2.76834	-0.722938	0.0446865
ENSG00000092439	TRPM7	transient receptor potential cation channel subfamily M member 7	11.0344	10.3114	-0.722973	0.0441449
ENSG00000179044	EXOC3L1	exocyst complex component 3 like 1	5.99521	5.27183	-0.723376	0.0129412
ENSG00000178573	MAF	MAF bZIP transcription factor	11.1011	10.3769	-0.724199	0.020327
ENSG00000188372	ZP3	zona pellucida glycoprotein 3	4.15759	3.4325	-0.725091	0.0490156
ENSG00000158104	HPD	4-hydroxyphenylpyruvate dioxygenase	14.5156	13.789	-0.72661	0.0332624
ENSG00000137474	MYO7A	myosin VIIA	10.1926	9.46526	-0.727371	0.0416991
ENSG00000111452	ADGRD1	adhesion G protein-coupled receptor D1	7.25275	6.5249	-0.727854	0.0353526
ENSG00000153208	MERTK	MER proto-oncogene, tyrosine kinase	9.8388	9.10981	-0.728983	0.0018762
ENSG00000131187	F12	coagulation factor XII	11.0545	10.3244	-0.730094	0.0286574
ENSG00000156239	N6AMT1	N-6 adenine-specific DNA methyltransferase 1 (putative)	8.03112	7.29954	-0.731579	0.0180548
ENSG00000162813	BPNT1	3(2), 5-bisphosphate nucleotidase 1	9.45952	8.72672	-0.732806	0.0106965
ENSG00000157657	ZNF618	zinc finger protein 618	8.21803	7.48512	-0.732914	0.0149804
ENSG00000161800	RACGAP1	Rac GTPase activating protein 1	7.24552	6.51238	-0.733139	0.00607605
ENSG00000182326	C1S	complement C1s	16.1335	15.4001	-0.733355	0.00642224
ENSG00000177614	PGBD5	piggyBac transposable element derived 5	7.93413	7.20026	-0.733872	0.0379498
ENSG00000177459	ERICH5	glutamate rich 5	8.46236	7.72624	-0.736118	0.00636016
ENSG00000064655	EYA2	EYA transcriptional coactivator and phosphatase 2	5.13067	4.39411	-0.736566	0.0238628
ENSG00000158125	XDH	xanthine dehydrogenase	10.6779	9.94032	-0.737598	0.0125258
ENSG00000102878	HSF4	heat shock transcription factor 4	7.33116	6.59352	-0.737639	0.0410069
ENSG00000174032	SLC25A30	solute carrier family 25 member 30	11.011	10.2717	-0.739301	0.0213851
ENSG00000196141	SPATS2L	spermatogenesis associated serine rich 2 like	11.3248	10.5843	-0.740554	0.000216838
ENSG00000138029	HADHB	hydroxyacyl-CoA dehydrogenase/3-ketoacyl-CoA thiolase/enoyl-CoA hydratase (trifunctional protein), beta subunit	13.1648	12.4241	-0.740694	0.00282713
ENSG00000251165	F11-AS1	F11 antisense RNA 1	9.12597	8.38197	-0.743997	0.0126382
ENSG00000101079	NDRG3	NDRG family member 3	9.44057	8.69366	-0.746913	0.0106776
ENSG00000162882	HAAO	3-hydroxyanthranilate 3,4-dioxygenase	9.8372	9.09007	-0.747126	0.0456608
ENSG00000106034	CPED1	cadherin like and PC-esterase domain containing 1	10.8162	10.0686	-0.747522	0.0113373
ENSG00000157502	MUM1L1	MUM1 like 1	6.51843	5.7693	-0.74913	0.0373642
ENSG00000113805	CNTN3	contactin 3	7.90109	7.1507	-0.750381	0.0285929
ENSG00000247982	LINC00926	long intergenic non-protein coding RNA 926	4.17383	3.42291	-0.750921	0.042013
ENSG00000139291	TMEM19	transmembrane protein 19	9.43844	8.68646	-0.751985	0.0074591
ENSG00000196187	TMEM63A	transmembrane protein 63A	10.6053	9.85285	-0.752484	0.00606489
ENSG00000196329	GIMAP5	GTPase, IMAP family member 5	9.25175	8.49689	-0.754853	0.00758753
ENSG00000185518	SV2B	synaptic vesicle glycoprotein 2B	5.22039	4.46446	-0.755936	0.0336416
ENSG00000270872	SRGAP2D	SLIT-ROBO Rho GTPase activating protein 2D (pseudogene)	5.75293	4.99632	-0.756612	0.013874
ENSG00000226124	FTCDNL1	formiminotransferase cyclodeaminase N-terminal like	6.67459	5.91769	-0.756907	0.0223573
ENSG00000181192	DHTKD1	dehydrogenase E1 and transketolase domain containing 1	12.0791	11.322	-0.757116	0.0297432
ENSG00000282851	BISPR	BST2 interferon stimulated positive regulator (non-protein coding)	7.94071	7.18228	-0.75843	0.0101277
ENSG00000171503	ETFDH	electron transfer flavoprotein dehydrogenase	12.4761	11.7168	-0.759289	0.00549227
ENSG00000078114	NEBL	nebulette	6.25837	5.49812	-0.760252	0.0102761
ENSG00000179833	SERTAD2	SERTA domain containing 2	9.64737	8.88603	-0.761343	0.0332648
ENSG00000055163	CYFIP2	cytoplasmic FMR1 interacting protein 2	10.4063	9.64317	-0.763086	0.00453288
ENSG00000182700	IGIP	IgA inducing protein	8.65784	7.89372	-0.764112	0.0324208
ENSG00000107537	PHYH	phytanoyl-CoA 2-hydroxylase	12.1533	11.3883	-0.764943	0.00640182
ENSG00000109680	TBC1D19	TBC1 domain family member 19	6.14562	5.38039	-0.765227	0.0113957
ENSG00000172403	SYNPO2	synaptopodin 2	9.36994	8.60285	-0.76709	0.0377389
ENSG00000149809	TM7SF2	transmembrane 7 superfamily member 2	8.92959	8.16155	-0.768043	0.00256891
ENSG00000164294	GPX8	glutathione peroxidase 8 (putative)	6.79189	6.02235	-0.769541	0.0222875
ENSG00000259479	SORD2P	sorbitol dehydrogenase 2, pseudogene	10.8675	10.0963	-0.77121	0.019371
ENSG00000130948	HSD17B3	hydroxysteroid 17-beta dehydrogenase 3	5.41679	4.64446	-0.772328	0.0220327
ENSG00000163071	SPATA18	spermatogenesis associated 18	6.56721	5.79467	-0.772539	0.0399628
ENSG00000134716	CYP2J2	cytochrome P450 family 2 subfamily J member 2	11.1772	10.4043	-0.772889	0.000915175
ENSG00000101323	HAO1	hydroxyacid oxidase 1	12.9054	12.1308	-0.774598	0.0365167
ENSG00000136881	BAAT	bile acid-CoA:amino acid N-acyltransferase	13.6687	12.8926	-0.776088	0.0401185
ENSG00000140945	CDH13	cadherin 13	7.72229	6.94519	-0.777097	0.0241904
ENSG00000104549	SQLE	squalene epoxidase	10.7628	9.98291	-0.779884	0.0102858
ENSG00000165140	FBP1	fructose-bisphosphatase 1	12.8438	12.0637	-0.780111	0.0125713
ENSG00000115687	PASK	PAS domain containing serine/threonine kinase	6.88918	6.10899	-0.78019	0.00669832
ENSG00000151623	NR3C2	nuclear receptor subfamily 3 group C member 2	8.84031	8.05937	-0.780931	0.000495487
ENSG00000072694	FCGR2B	Fc fragment of IgG receptor IIb	9.82023	9.03863	-0.781603	0.000968123
ENSG00000069122	ADGRF5	adhesion G protein-coupled receptor F5	10.5673	9.78423	-0.783092	0.00172293
ENSG00000247746	USP51	ubiquitin specific peptidase 51	5.59712	4.81399	-0.783126	0.0176644
ENSG00000119917	IFIT3	interferon induced protein with tetratricopeptide repeats 3	9.45648	8.67146	-0.785021	0.0429696
ENSG00000170323	FABP4	fatty acid binding protein 4	7.47066	6.6854	-0.785256	0.00987242
ENSG00000068489	PRR11	proline rich 11	5.31381	4.52772	-0.786091	0.0478431
ENSG00000178537	SLC25A20	solute carrier family 25 member 20	11.2046	10.4177	-0.786945	0.000715608
ENSG00000003056	M6PR	mannose-6-phosphate receptor, cation dependent	10.9017	10.1117	-0.790005	0.0131123
ENSG00000156298	TSPAN7	tetraspanin 7	10.1819	9.39074	-0.791112	0.00879072
ENSG00000185875	THNSL1	threonine synthase like 1	9.4068	8.61389	-0.792908	0.0131856
ENSG00000095539	SEMA4G	semaphorin 4G	9.37501	8.58138	-0.793628	0.0263795
ENSG00000175003	SLC22A1	solute carrier family 22 member 1	12.7485	11.9533	-0.795239	0.0198719
ENSG00000197062	ZSCAN26	zinc finger and SCAN domain containing 26	8.16624	7.36962	-0.796623	4.84e-05
ENSG00000166927	MS4A7	membrane spanning 4-domains A7	10.3856	9.5887	-0.796909	0.0202013
ENSG00000093072	ADA2	adenosine deaminase 2	9.35554	8.55857	-0.796973	0.0440388
ENSG00000239884	RN7SL608P	RNA, 7SL, cytoplasmic 608, pseudogene	1.99723	1.19928	-0.797951	0.0336505
ENSG00000182795	C1orf116	chromosome 1 open reading frame 116	6.28202	5.48312	-0.7989	0.0185915
ENSG00000196110	ZNF699	zinc finger protein 699	5.48527	4.68495	-0.80032	0.0304302
ENSG00000186204	CYP4F12	cytochrome P450 family 4 subfamily F member 12	9.5858	8.78508	-0.800721	0.0251434
ENSG00000163755	HPS3	HPS3, biogenesis of lysosomal organelles complex 2 subunit 1	10.2723	9.47134	-0.800964	0.0325725
ENSG00000158023	WDR66	WD repeat domain 66	6.23604	5.43507	-0.800972	0.0204809
ENSG00000106066	CPVL	carboxypeptidase, vitellogenic like	9.8382	9.03639	-0.801809	0.0352123
ENSG00000049323	LTBP1	latent transforming growth factor beta binding protein 1	10.2183	9.41349	-0.80485	0.00430959
ENSG00000136867	SLC31A2	solute carrier family 31 member 2	8.73215	7.92536	-0.806792	0.00280067
ENSG00000072422	RHOBTB1	Rho related BTB domain containing 1	8.97785	8.17055	-0.807296	0.00133191
ENSG00000118922	KLF12	Kruppel like factor 12	9.85951	9.04958	-0.809939	0.016893
ENSG00000186814	ZSCAN30	zinc finger and SCAN domain containing 30	7.71666	6.90441	-0.812254	0.0265921
ENSG00000109758	HGFAC	HGF activator	10.2892	9.47581	-0.813371	0.00038581
ENSG00000007129	CEACAM21	carcinoembryonic antigen related cell adhesion molecule 21	5.14829	4.33383	-0.814461	0.0460592
ENSG00000175305	CCNE2	cyclin E2	5.42179	4.60272	-0.819062	0.029813
ENSG00000106853	PTGR1	prostaglandin reductase 1	12.8416	12.022	-0.819566	0.0272971
ENSG00000189056	RELN	reelin	11.3401	10.5196	-0.820471	0.017854
ENSG00000130584	ZBTB46	zinc finger and BTB domain containing 46	8.15485	7.33188	-0.822966	0.0181444
ENSG00000120341	SEC16B	SEC16 homolog B, endoplasmic reticulum export factor	9.66675	8.84367	-0.823082	0.00152625
ENSG00000178075	GRAMD1C	GRAM domain containing 1C	8.36301	7.5397	-0.823317	0.0486431
ENSG00000152580	IGSF10	immunoglobulin superfamily member 10	6.8842	6.06009	-0.824115	0.0446451
ENSG00000228903	RASA4CP	RAS p21 protein activator 4C, pseudogene	5.11202	4.28678	-0.825244	0.021295
ENSG00000250722	SELENOP	selenoprotein P	15.7094	14.8841	-0.825335	0.0107998
ENSG00000138615	CILP	cartilage intermediate layer protein	6.86961	6.04354	-0.826071	0.0200915
ENSG00000168016	TRANK1	tetratricopeptide repeat and ankyrin repeat containing 1	9.74795	8.92112	-0.826829	0.00406975
ENSG00000169679	BUB1	BUB1 mitotic checkpoint serine/threonine kinase	4.62891	3.80177	-0.827136	0.0363982
ENSG00000168904	LRRC28	leucine rich repeat containing 28	9.0425	8.21297	-0.829534	0.00823885
ENSG00000100314	CABP7	calcium binding protein 7	1.34794	0.517979	-0.829965	0.00471996
ENSG00000179743	FLJ37453	uncharacterized LOC729614	5.5625	4.73189	-0.830609	0.0201163
ENSG00000135838	NPL	N-acetylneuraminate pyruvate lyase	9.60516	8.77144	-0.833724	0.000244643
ENSG00000137070	IL11RA	interleukin 11 receptor subunit alpha	8.45451	7.62034	-0.834166	0.014798
ENSG00000188906	LRRK2	leucine rich repeat kinase 2	9.11665	8.28106	-0.835595	0.0102032
ENSG00000036448	MYOM2	myomesin 2	6.46478	5.62839	-0.836397	0.0129838
ENSG00000151726	ACSL1	acyl-CoA synthetase long chain family member 1	15.1497	14.313	-0.836632	0.0163589
ENSG00000167083	GNGT2	G protein subunit gamma transducin 2	5.43685	4.59967	-0.837173	0.0103655
ENSG00000235217	TSPY26P	testis specific protein, Y-linked 26, pseudogene	3.22542	2.38787	-0.837551	0.0429299
ENSG00000077152	UBE2T	ubiquitin conjugating enzyme E2 T	6.38512	5.54648	-0.838648	0.00388241
ENSG00000142794	NBPF3	NBPF member 3	6.25626	5.41711	-0.839151	0.0175278
ENSG00000138413	IDH1	isocitrate dehydrogenase (NADP(+)) 1, cytosolic	13.1617	12.3224	-0.839227	0.0202371
ENSG00000148225	WDR31	WD repeat domain 31	6.40728	5.56767	-0.839609	0.0158081
ENSG00000136250	AOAH	acyloxyacyl hydrolase	8.17455	7.33318	-0.841368	0.0363449
ENSG00000162409	PRKAA2	protein kinase AMP-activated catalytic subunit alpha 2	7.45816	6.61588	-0.842281	0.00615738
ENSG00000137101	CD72	CD72 molecule	7.04549	6.20051	-0.844976	0.00971591
ENSG00000150656	CNDP1	carnosine dipeptidase 1	9.38707	8.53964	-0.847435	0.0055091
ENSG00000110324	IL10RA	interleukin 10 receptor subunit alpha	9.08989	8.24244	-0.847451	0.0318475
ENSG00000277561	GOLGA8IP	golgin A8 family member I, pseudogene	3.78453	2.93486	-0.849673	0.0426894
ENSG00000143355	LHX9	LIM homeobox 9	4.89086	4.04013	-0.850734	0.016989
ENSG00000167165	UGT1A6	UDP glucuronosyltransferase family 1 member A6	10.0117	9.15995	-0.851737	0.00744469
ENSG00000185010	F8	coagulation factor VIII	10.7788	9.92482	-0.853983	0.00577321
ENSG00000169439	SDC2	syndecan 2	12.3773	11.523	-0.854358	0.0188536
ENSG00000117054	ACADM	acyl-CoA dehydrogenase, C-4 to C-12 straight chain	11.9813	11.126	-0.855244	0.0131858
ENSG00000164398	ACSL6	acyl-CoA synthetase long chain family member 6	6.93421	6.07818	-0.85603	0.0112407
ENSG00000076555	ACACB	acetyl-CoA carboxylase beta	12.0947	11.2362	-0.858466	0.0283651
ENSG00000138760	SCARB2	scavenger receptor class B member 2	13.4592	12.6002	-0.858976	0.00435715
ENSG00000140263	SORD	sorbitol dehydrogenase	11.2718	10.4123	-0.859541	0.0387818
ENSG00000169891	REPS2	RALBP1 associated Eps domain containing 2	8.69356	7.82993	-0.863623	0.0192552
ENSG00000184454	NCMAP	non-compact myelin associated protein	6.36004	5.49557	-0.864465	0.0182269
ENSG00000164120	HPGD	hydroxyprostaglandin dehydrogenase 15-(NAD)	12.0399	11.1745	-0.865374	0.0100905
ENSG00000176890	TYMS	thymidylate synthetase	7.85605	6.99045	-0.865598	0.0184975
ENSG00000213996	TM6SF2	transmembrane 6 superfamily member 2	7.53498	6.66626	-0.868724	0.0356837
ENSG00000213930	GALT	galactose-1-phosphate uridylyltransferase	9.68506	8.81561	-0.869453	0.000243196
ENSG00000256612	CYP2B7P	cytochrome P450 family 2 subfamily B member 7, pseudogene	6.83486	5.96059	-0.874267	0.00323482
ENSG00000203865	ATP1A1-AS1	ATP1A1 antisense RNA 1	5.26127	4.38501	-0.87626	0.0498708
ENSG00000178826	TMEM139	transmembrane protein 139	6.92281	6.04513	-0.877672	0.00917879
ENSG00000197444	OGDHL	oxoglutarate dehydrogenase like	10.8219	9.94157	-0.880357	0.00718458
ENSG00000154016	GRAP	GRB2-related adaptor protein	7.691	6.80839	-0.882606	0.0108627
ENSG00000095970	TREM2	triggering receptor expressed on myeloid cells 2	4.97378	4.08997	-0.883819	0.0240058
ENSG00000108448	TRIM16L	tripartite motif containing 16 like	7.12003	6.23302	-0.887011	0.00200678
ENSG00000163762	TM4SF18	transmembrane 4 L six family member 18	9.1394	8.25209	-0.887311	0.0303586
ENSG00000058668	ATP2B4	ATPase plasma membrane Ca2+ transporting 4	11.342	10.4533	-0.888779	0.0083378
ENSG00000181035	SLC25A42	solute carrier family 25 member 42	10.6847	9.79491	-0.889742	0.0169549
ENSG00000274736	CCL23	C-C motif chemokine ligand 23	6.47814	5.58675	-0.891393	0.0013728
ENSG00000110841	PPFIBP1	PPFIA binding protein 1	10.4173	9.52387	-0.893431	0.000161804
ENSG00000249096	LINC02362	long intergenic non-protein coding RNA 2362	9.52565	8.63184	-0.893812	0.00593985
ENSG00000168497	CAVIN2	caveolae associated protein 2	9.93131	9.03639	-0.894921	0.0105602
ENSG00000174469	CNTNAP2	contactin associated protein like 2	8.63291	7.73744	-0.895471	0.016447
ENSG00000123219	CENPK	centromere protein K	4.38555	3.4868	-0.898747	0.00608909
ENSG00000115425	PECR	peroxisomal trans-2-enoyl-CoA reductase	10.7323	9.8317	-0.900561	0.0113913
ENSG00000108947	EFNB3	ephrin B3	5.44249	4.53847	-0.904023	0.0423661
ENSG00000137491	SLCO2B1	solute carrier organic anion transporter family member 2B1	11.3005	10.3909	-0.909604	0.0256473
ENSG00000068078	FGFR3	fibroblast growth factor receptor 3	9.88595	8.97377	-0.912184	0.0103857
ENSG00000134955	SLC37A2	solute carrier family 37 member 2	7.74742	6.83501	-0.912408	0.0405986
ENSG00000060971	ACAA1	acetyl-CoA acyltransferase 1	12.4767	11.5617	-0.914998	0.00214952
ENSG00000165105	RASEF	RAS and EF-hand domain containing	7.33334	6.41759	-0.915747	0.00274245
ENSG00000242110	AMACR	alpha-methylacyl-CoA racemase	9.78186	8.86603	-0.915823	0.0191898
ENSG00000142856	ITGB3BP	integrin subunit beta 3 binding protein	7.30512	6.38855	-0.916567	0.0146561
ENSG00000164035	EMCN	endomucin	9.2636	8.34485	-0.918743	0.00750469
ENSG00000102287	GABRE	gamma-aminobutyric acid type A receptor epsilon subunit	7.91455	6.99551	-0.919032	0.0369042
ENSG00000189298	ZKSCAN3	zinc finger with KRAB and SCAN domains 3	7.23897	6.31876	-0.920206	0.00010765
ENSG00000038945	MSR1	macrophage scavenger receptor 1	10.4281	9.50618	-0.921898	0.0101739
ENSG00000236499	LINC00896	long intergenic non-protein coding RNA 896	3.29462	2.37038	-0.924243	0.023488
ENSG00000248590	GLDCP1	glycine decarboxylase pseudogene 1	6.02187	5.09705	-0.924821	0.00538569
ENSG00000121274	PAPD5	poly(A) RNA polymerase D5, non-canonical	9.41272	8.48515	-0.927566	0.00221354
ENSG00000177675	CD163L1	CD163 molecule like 1	7.2864	6.3559	-0.930505	0.022169
ENSG00000021826	CPS1	carbamoyl-phosphate synthase 1	15.571	14.639	-0.932	0.0351704
ENSG00000139187	KLRG1	killer cell lectin like receptor G1	6.14892	5.21405	-0.934875	0.0248363
ENSG00000258754	LINC01579	long intergenic non-protein coding RNA 1579	0.936333	0	-0.936333	0.0429055
ENSG00000161031	PGLYRP2	peptidoglycan recognition protein 2	9.5288	8.58488	-0.943922	0.014941
ENSG00000065534	MYLK	myosin light chain kinase	11.8875	10.9415	-0.946026	0.000404742
ENSG00000173894	CBX2	chromobox 2	5.48365	4.53457	-0.949076	0.0190156
ENSG00000276566	IGKV1D-13	immunoglobulin kappa variable 1D-13	4.76691	3.81438	-0.952531	0.0255803
ENSG00000283845	MIR4721	microRNA 4721	2.07896	1.12531	-0.953656	0.0271926
ENSG00000116005	PCYOX1	prenylcysteine oxidase 1	12.4005	11.4449	-0.955513	0.0105266
ENSG00000144827	ABHD10	abhydrolase domain containing 10	9.70676	8.74995	-0.956805	0.0182115
ENSG00000125520	SLC2A4RG	SLC2A4 regulator	9.22733	8.26977	-0.957561	0.0226115
ENSG00000099219	ERMP1	endoplasmic reticulum metallopeptidase 1	9.38045	8.42089	-0.959563	0.0164589
ENSG00000165152	TMEM246	transmembrane protein 246	8.03686	7.07605	-0.960816	0.0356347
ENSG00000198774	RASSF9	Ras association domain family member 9	7.3573	6.39593	-0.961364	0.0166933
ENSG00000159899	NPR2	natriuretic peptide receptor 2	8.85001	7.88478	-0.965223	0.00140823
ENSG00000197635	DPP4	dipeptidyl peptidase 4	10.1512	9.18391	-0.967324	0.000804071
ENSG00000224597	SVIL-AS1	SVIL antisense RNA 1	7.76751	6.79997	-0.967542	0.000609205
ENSG00000215859	PDZK1P1	PDZ domain containing 1 pseudogene 1	3.20287	2.23417	-0.968702	0.0325619
ENSG00000104938	CLEC4M	C-type lectin domain family 4 member M	9.83062	8.86128	-0.969344	0.00344564
ENSG00000162194	LBHD1	LBH domain containing 1	8.30327	7.33382	-0.969449	0.00133946
ENSG00000120907	ADRA1A	adrenoceptor alpha 1A	10.0771	9.1075	-0.969599	0.0293639
ENSG00000129595	EPB41L4A	erythrocyte membrane protein band 4.1 like 4A	8.11228	7.14253	-0.969748	0.00318014
ENSG00000166435	XRRA1	X-ray radiation resistance associated 1	9.10844	8.13741	-0.97103	5.82e-05
ENSG00000136237	RAPGEF5	Rap guanine nucleotide exchange factor 5	9.92868	8.95569	-0.97299	3.74e-05
ENSG00000188459	WASF4P	WAS protein family member 4, pseudogene	2.57241	1.5992	-0.973213	0.0452867
ENSG00000240720	LRRD1	leucine rich repeats and death domain containing 1	0.97465	0	-0.97465	0.0493224
ENSG00000258568	RHOQP1	ras homolog family member Q pseudogene 1	3.7833	2.80815	-0.975142	0.0119261
ENSG00000198963	RORB	RAR related orphan receptor B	4.5016	3.5252	-0.976405	0.0201517
ENSG00000134343	ANO3	anoctamin 3	5.53589	4.55904	-0.97685	0.0121075
ENSG00000115361	ACADL	acyl-CoA dehydrogenase, long chain	9.58173	8.60479	-0.976947	0.00478263
ENSG00000158186	MRAS	muscle RAS oncogene homolog	7.10203	6.12072	-0.981315	0.0233479
ENSG00000167107	ACSF2	acyl-CoA synthetase family member 2	9.47345	8.49114	-0.982306	0.002642
ENSG00000136872	ALDOB	aldolase, fructose-bisphosphate B	16.5654	15.5824	-0.982966	0.0107685
ENSG00000260027	HOXB7	homeobox B7	4.50127	3.51793	-0.983345	0.0191972
ENSG00000110079	MS4A4A	membrane spanning 4-domains A4A	9.29472	8.3102	-0.98452	0.0211607
ENSG00000162881	OXER1	oxoeicosanoid receptor 1	6.75503	5.76845	-0.986588	0.0473915
ENSG00000149548	CCDC15	coiled-coil domain containing 15	5.59477	4.60567	-0.9891	0.00818492
ENSG00000134940	ACRV1	acrosomal vesicle protein 1	0.989308	0	-0.989308	0.0473354
ENSG00000164128	NPY1R	neuropeptide Y receptor Y1	9.03393	8.04363	-0.990303	0.00745304
ENSG00000139626	ITGB7	integrin subunit beta 7	7.41157	6.42124	-0.990334	0.0056567
ENSG00000187682	ERAS	ES cell expressed Ras	0.992776	0	-0.992776	0.0496585
ENSG00000227117	HORMAD2-AS1	HORMAD2 and MTMR3 antisense RNA 1	7.39704	6.40356	-0.993482	0.00792612
ENSG00000120215	MLANA	melan-A	3.0694	2.07405	-0.995346	0.0421487
ENSG00000134962	KLB	klotho beta	11.1551	10.1565	-0.998551	0.0139659
ENSG00000187097	ENTPD5	ectonucleoside triphosphate diphosphohydrolase 5	12.3968	11.3904	-1.00639	0.0246411
ENSG00000119943	PYROXD2	pyridine nucleotide-disulphide oxidoreductase domain 2	8.26927	7.26189	-1.00738	0.0216484
ENSG00000079689	SCGN	secretagogin, EF-hand calcium binding protein	5.451	4.44173	-1.00927	0.0416573
ENSG00000186472	PCLO	piccolo presynaptic cytomatrix protein	5.18842	4.17594	-1.01248	0.0455724
ENSG00000198105	ZNF248	zinc finger protein 248	8.50873	7.49608	-1.01265	0.00192601
ENSG00000128052	KDR	kinase insert domain receptor	11.1749	10.1622	-1.01272	0.00503157
ENSG00000165304	MELK	maternal embryonic leucine zipper kinase	4.97628	3.95845	-1.01783	0.0443572
ENSG00000263961	C1orf186	chromosome 1 open reading frame 186	5.05799	4.03219	-1.0258	0.013835
ENSG00000095752	IL11	interleukin 11	1.03104	0	-1.03104	0.0439623
ENSG00000173898	SPTBN2	spectrin beta, non-erythrocytic 2	9.84406	8.81237	-1.0317	0.00144319
ENSG00000175538	KCNE3	potassium voltage-gated channel subfamily E regulatory subunit 3	8.02142	6.98557	-1.03585	0.00437268
ENSG00000204653	ASPDH	aspartate dehydrogenase domain containing	7.34778	6.31191	-1.03587	0.0476956
ENSG00000074527	NTN4	netrin 4	10.5292	9.49008	-1.03916	0.0155022
ENSG00000139209	SLC38A4	solute carrier family 38 member 4	14.2349	13.1955	-1.03943	0.0202672
ENSG00000101210	EEF1A2	eukaryotic translation elongation factor 1 alpha 2	5.4576	4.41519	-1.04242	0.0102864
ENSG00000260314	MRC1	mannose receptor C-type 1	12.2298	11.1836	-1.04617	0.0114541
ENSG00000241935	HOGA1	4-hydroxy-2-oxoglutarate aldolase 1	8.9344	7.8854	-1.049	0.0156428
ENSG00000145920	CPLX2	complexin 2	3.35044	2.29995	-1.05049	0.0334296
ENSG00000223459	TCAF1P1	TRPM8 channel associated factor 1 pseudogene 1	7.90904	6.85072	-1.05832	0.000924372
ENSG00000131620	ANO1	anoctamin 1	10.9169	9.85692	-1.05998	0.0122782
ENSG00000185219	ZNF445	zinc finger protein 445	7.02886	5.96864	-1.06022	0.00444574
ENSG00000164039	BDH2	3-hydroxybutyrate dehydrogenase 2	10.6178	9.55295	-1.06485	0.0336754
ENSG00000250400	LINC00977	long intergenic non-protein coding RNA 977	1.06488	0	-1.06488	0.0407285
ENSG00000105609	LILRB5	leukocyte immunoglobulin like receptor B5	9.66015	8.59303	-1.06711	0.0034026
ENSG00000100362	PVALB	parvalbumin	3.80914	2.74085	-1.06829	0.0282409
ENSG00000230356	NCAPD2P1	non-SMC condensin I complex subunit D2 pseudogene 1	1.07136	0	-1.07136	0.0244888
ENSG00000237406	NDUFA9P1	NADH:ubiquinone oxidoreductase subunit A9 pseudogene 1	1.07203	0	-1.07203	0.0275662
ENSG00000178852	EFCAB13	EF-hand calcium binding domain 13	5.77933	4.70587	-1.07347	0.0355627
ENSG00000111665	CDCA3	cell division cycle associated 3	5.15913	4.08502	-1.07411	0.00339175
ENSG00000158292	GPR153	G protein-coupled receptor 153	7.38317	6.30342	-1.07975	0.000472388
ENSG00000197558	SSPO	SCO-spondin	3.5212	2.44123	-1.07997	0.0463067
ENSG00000147872	PLIN2	perilipin 2	13.4605	12.3718	-1.08873	0.000241612
ENSG00000159173	TNNI1	troponin I1, slow skeletal type	6.48607	5.3961	-1.08997	0.0431394
ENSG00000260372	AQP4-AS1	AQP4 antisense RNA 1	1.19595	0.105087	-1.09087	0.0281572
ENSG00000138411	HECW2	HECT, C2 and WW domain containing E3 ubiquitin protein ligase 2	9.31412	8.21722	-1.0969	0.00259866
ENSG00000135549	PKIB	cAMP-dependent protein kinase inhibitor beta	5.98472	4.8872	-1.09752	0.0029951
ENSG00000081148	IMPG2	interphotoreceptor matrix proteoglycan 2	3.73289	2.63286	-1.10002	0.0110424
ENSG00000234118	RPL13AP6	ribosomal protein L13a pseudogene 6	1.32872	0.227571	-1.10115	0.0244111
ENSG00000188060	RAB42	RAB42, member RAS oncogene family	5.71442	4.60737	-1.10705	0.00727718
ENSG00000081479	LRP2	LDL receptor related protein 2	6.14749	5.03982	-1.10767	0.036905
ENSG00000257557	PPP1R12A-AS1	PPP1R12A antisense RNA 1	3.66603	2.55817	-1.10786	0.0267621
ENSG00000068615	REEP1	receptor accessory protein 1	5.91814	4.80729	-1.11086	0.0310999
ENSG00000204390	HSPA1L	heat shock protein family A (Hsp70) member 1 like	6.39714	5.28407	-1.11307	0.00735941
ENSG00000214694	ARHGEF33	Rho guanine nucleotide exchange factor 33	3.10629	1.98476	-1.12153	0.0387923
ENSG00000170006	TMEM154	transmembrane protein 154	7.57951	6.4565	-1.12301	0.000535266
ENSG00000169313	P2RY12	purinergic receptor P2Y12	6.13758	5.00898	-1.12859	0.015274
ENSG00000178175	ZNF366	zinc finger protein 366	6.15926	5.02859	-1.13067	0.0318276
ENSG00000131747	TOP2A	topoisomerase (DNA) II alpha	6.69814	5.56561	-1.13253	0.0349568
ENSG00000280734	LINC01232	long intergenic non-protein coding RNA 1232	7.18868	6.05349	-1.13519	0.000100838
ENSG00000124222	STX16	syntaxin 16	10.4485	9.31327	-1.13521	0.00430085
ENSG00000258484	SPESP1	sperm equatorial segment protein 1	5.60916	4.47103	-1.13812	0.0125966
ENSG00000135409	AMHR2	anti-Mullerian hormone receptor type 2	3.37338	2.23485	-1.13854	0.049515
ENSG00000204528	PSORS1C3	psoriasis susceptibility 1 candidate 3 (non-protein coding)	3.31386	2.1746	-1.13926	0.0190068
ENSG00000183036	PCP4	Purkinje cell protein 4	1.14498	0	-1.14498	0.0354978
ENSG00000099284	H2AFY2	H2A histone family member Y2	7.86064	6.71553	-1.14511	2.89e-05
ENSG00000152760	TCTEX1D1	Tctex1 domain containing 1	5.3135	4.16411	-1.14939	0.0156809
ENSG00000221916	C19orf73	chromosome 19 open reading frame 73	4.31648	3.16598	-1.1505	0.0197704
ENSG00000232827	LINC01189	long intergenic non-protein coding RNA 1189	1.15076	0	-1.15076	0.0205458
ENSG00000142197	DOPEY2	dopey family member 2	9.47956	8.32643	-1.15312	2.1e-06
ENSG00000080986	NDC80	NDC80, kinetochore complex component	4.15781	3.00106	-1.15675	0.0342621
ENSG00000187686	KRT18P59	keratin 18 pseudogene 59	2.93822	1.78119	-1.15703	0.0452345
ENSG00000203896	LIME1	Lck interacting transmembrane adaptor 1	6.68261	5.5254	-1.15721	0.0344995
ENSG00000131791	PRKAB2	protein kinase AMP-activated non-catalytic subunit beta 2	10.7507	9.58962	-1.16109	4.03e-05
ENSG00000260941	LINC00622	long intergenic non-protein coding RNA 622	3.96582	2.80176	-1.16406	0.0358082
ENSG00000207357	RNU6-2	RNA, U6 small nuclear 2	2.94133	1.77433	-1.167	0.0367695
ENSG00000256039	LINC02446	long intergenic non-protein coding RNA 2446	2.96176	1.79156	-1.1702	0.0228264
ENSG00000119922	IFIT2	interferon induced protein with tetratricopeptide repeats 2	9.11846	7.94596	-1.1725	0.00446612
ENSG00000091622	PITPNM3	PITPNM family member 3	6.47094	5.29746	-1.17348	0.0111352
ENSG00000102575	ACP5	acid phosphatase 5, tartrate resistant	9.44268	8.26328	-1.17939	0.000442619
ENSG00000109674	NEIL3	nei like DNA glycosylase 3	1.82595	0.644365	-1.18159	0.0487465
ENSG00000188833	ENTPD8	ectonucleoside triphosphate diphosphohydrolase 8	6.99208	5.81044	-1.18164	0.017487
ENSG00000166349	RAG1	recombination activating 1	5.85646	4.67273	-1.18373	0.00609776
ENSG00000256751	PLBD1-AS1	PLBD1 antisense RNA 1	3.65659	2.47089	-1.1857	0.00959207
ENSG00000105088	OLFM2	olfactomedin 2	9.661	8.47472	-1.18628	0.0244336
ENSG00000198077	CYP2A7	cytochrome P450 family 2 subfamily A member 7	7.21404	6.02744	-1.18659	0.0327255
ENSG00000143228	NUF2	NUF2, NDC80 kinetochore complex component	3.95426	2.76067	-1.19359	0.0440429
ENSG00000204682	CASC10	cancer susceptibility 10	6.97716	5.78254	-1.19462	0.0417243
ENSG00000166128	RAB8B	RAB8B, member RAS oncogene family	9.90345	8.70261	-1.20084	0.00557289
ENSG00000156284	CLDN8	claudin 8	1.2017	0	-1.2017	0.0149905
ENSG00000184911	DMRTC1B	DMRT like family C1B	1.2017	0	-1.2017	0.0149905
ENSG00000270392	PFN1P2	profilin 1 pseudogene 2	4.01843	2.81447	-1.20396	0.00559917
ENSG00000196660	SLC30A10	solute carrier family 30 member 10	9.64128	8.43122	-1.21006	0.0242362
ENSG00000138315	OIT3	oncoprotein induced transcript 3	11.6006	10.3883	-1.21232	0.00134283
ENSG00000133710	SPINK5	serine peptidase inhibitor, Kazal type 5	2.52814	1.31279	-1.21535	0.0477163
ENSG00000152782	PANK1	pantothenate kinase 1	11.1892	9.97253	-1.2167	0.0130182
ENSG00000156886	ITGAD	integrin subunit alpha D	6.01123	4.79453	-1.2167	0.0270377
ENSG00000157303	SUSD3	sushi domain containing 3	6.69677	5.47798	-1.21879	0.0029503
ENSG00000278023	RDM1	RAD52 motif containing 1	1.22033	0	-1.22033	0.0283241
ENSG00000183780	SLC35F3	solute carrier family 35 member F3	2.01408	0.792746	-1.22134	0.0419056
ENSG00000205822	TPTE2P6	transmembrane phosphoinositide 3-phosphatase and tensin homolog 2 pseudogene 6	1.37128	0.123801	-1.24748	0.0158746
ENSG00000141096	DPEP3	dipeptidase 3	1.35938	0.111111	-1.24827	0.0147252
ENSG00000092068	SLC7A8	solute carrier family 7 member 8	8.6683	7.41385	-1.25445	0.000327294
ENSG00000214889	RPS9P1	ribosomal protein S9 pseudogene 1	1.25845	0	-1.25845	0.0262811
ENSG00000101746	NOL4	nucleolar protein 4	2.11595	0.854683	-1.26127	0.0454066
ENSG00000147124	ZNF41	zinc finger protein 41	8.25674	6.9952	-1.26154	0.00998186
ENSG00000058673	ZC3H11A	zinc finger CCCH-type containing 11A	9.48977	8.22259	-1.26718	0.00212001
ENSG00000163354	DCST2	DC-STAMP domain containing 2	4.08114	2.81243	-1.26872	0.0340176
ENSG00000151490	PTPRO	protein tyrosine phosphatase, receptor type O	6.63266	5.35998	-1.27268	0.00994048
ENSG00000170959	DCDC1	doublecortin domain containing 1	6.65147	5.37473	-1.27674	0.0196114
ENSG00000196090	PTPRT	protein tyrosine phosphatase, receptor type T	5.25051	3.9699	-1.2806	0.00611023
ENSG00000143994	ABHD1	abhydrolase domain containing 1	4.88115	3.59911	-1.28204	0.00188062
ENSG00000121691	CAT	catalase	13.5694	12.286	-1.28346	0.0049319
ENSG00000181827	RFX7	regulatory factor X7	8.54898	7.26241	-1.28657	0.000283551
ENSG00000126878	AIF1L	allograft inflammatory factor 1 like	6.38722	5.09803	-1.28919	0.014008
ENSG00000198765	SYCP1	synaptonemal complex protein 1	1.29414	0	-1.29414	0.0220266
ENSG00000004139	SARM1	sterile alpha and TIR motif containing 1	7.88472	6.58635	-1.29837	0.0055794
ENSG00000174327	SLC16A13	solute carrier family 16 member 13	8.708	7.40773	-1.30028	0.00413818
ENSG00000244476	ERVFRD-1	endogenous retrovirus group FRD member 1, envelope	3.26563	1.95643	-1.3092	0.0139326
ENSG00000186648	CARMIL3	capping protein regulator and myosin 1 linker 3	3.36767	2.05829	-1.30938	0.0360592
ENSG00000157456	CCNB2	cyclin B2	4.86893	3.55953	-1.3094	0.0396798
ENSG00000145386	CCNA2	cyclin A2	6.13328	4.81306	-1.32022	0.00264657
ENSG00000172828	CES3	carboxylesterase 3	9.07147	7.74411	-1.32736	0.0072542
ENSG00000163687	DNASE1L3	deoxyribonuclease 1 like 3	11.4734	10.1433	-1.33008	0.00258944
ENSG00000132854	KANK4	KN motif and ankyrin repeat domains 4	5.85134	4.51977	-1.33158	0.0404071
ENSG00000169607	CKAP2L	cytoskeleton associated protein 2 like	4.72616	3.39179	-1.33437	0.00877059
ENSG00000009765	IYD	iodotyrosine deiodinase	8.77108	7.43239	-1.33869	0.00593799
ENSG00000179846	NKPD1	NTPase KAP family P-loop domain containing 1	1.44877	0.105087	-1.34369	0.00652054
ENSG00000107518	ATRNL1	attractin like 1	6.72035	5.37424	-1.34611	0.00043483
ENSG00000118193	KIF14	kinesin family member 14	4.53095	3.17877	-1.35219	0.0263084
ENSG00000186231	KLHL32	kelch like family member 32	4.71684	3.36126	-1.35558	0.0436353
ENSG00000163586	FABP1	fatty acid binding protein 1	15.2938	13.938	-1.35575	0.0097836
ENSG00000237949	LINC00844	long intergenic non-protein coding RNA 844	7.20576	5.8496	-1.35616	0.00600558
ENSG00000198796	ALPK2	alpha kinase 2	8.50506	7.1442	-1.36087	0.0269252
ENSG00000149948	HMGA2	high mobility group AT-hook 2	1.36408	0	-1.36408	0.00920908
ENSG00000168229	PTGDR	prostaglandin D2 receptor	4.01744	2.65321	-1.36423	0.0378261
ENSG00000156113	KCNMA1	potassium calcium-activated channel subfamily M alpha 1	8.47767	7.1122	-1.36547	0.000121861
ENSG00000178596	GAPDHP29	glyceraldehyde 3 phosphate dehydrogenase pseudogene 29	1.37153	0	-1.37153	0.00587926
ENSG00000262209	PCDHGB3	protocadherin gamma subfamily B, 3	3.98324	2.60236	-1.38088	0.0415929
ENSG00000213606	AKR1B10P1	aldo-keto reductase family 1 member B10 pseudogene 1	1.60981	0.228122	-1.38169	0.0417123
ENSG00000116748	AMPD1	adenosine monophosphate deaminase 1	3.70055	2.31112	-1.38943	0.0368696
ENSG00000139445	FOXN4	forkhead box N4	1.81571	0.425481	-1.39023	0.0361051
ENSG00000232699	BDH2P1	3-hydroxybutyrate dehydrogenase 2, pseudogene 1	4.15168	2.75823	-1.39346	0.025492
ENSG00000241224	C3orf85	chromosome 3 open reading frame 85	6.99454	5.59984	-1.3947	0.022223
ENSG00000188958	UTS2B	urotensin 2B	1.59687	0.200315	-1.39655	0.0351649
ENSG00000138109	CYP2C9	cytochrome P450 family 2 subfamily C member 9	13.77	12.371	-1.39899	0.00394502
ENSG00000108515	ENO3	enolase 3	10.714	9.31276	-1.40123	0.0018126
ENSG00000189223	PAX8-AS1	PAX8 antisense RNA 1	8.28673	6.88228	-1.40445	0.0419426
ENSG00000089685	BIRC5	baculoviral IAP repeat containing 5	4.77343	3.36722	-1.40621	0.0443002
ENSG00000229108	MEOX2-AS1	MEOX2 antisense RNA 1 (head to head)	1.7395	0.317263	-1.42224	0.0135998
ENSG00000163040	CCDC74A	coiled-coil domain containing 74A	4.67961	3.25524	-1.42437	0.0441801
ENSG00000154252	GAL3ST2	galactose-3-O-sulfotransferase 2	1.42493	0	-1.42493	0.00716289
ENSG00000214447	FAM187A	family with sequence similarity 187 member A	1.4276	0	-1.4276	0.0188793
ENSG00000168314	MOBP	myelin-associated oligodendrocyte basic protein	3.06244	1.62899	-1.43345	0.0249449
ENSG00000243135	UGT1A3	UDP glucuronosyltransferase family 1 member A3	8.85918	7.41802	-1.44116	3.25e-05
ENSG00000166922	SCG5	secretogranin V	6.36919	4.92181	-1.44738	0.00159247
ENSG00000163449	TMEM169	transmembrane protein 169	6.08943	4.63825	-1.45118	0.000215769
ENSG00000122787	AKR1D1	aldo-keto reductase family 1 member D1	9.6526	8.1913	-1.4613	0.0361116
ENSG00000166856	GPR182	G protein-coupled receptor 182	7.65483	6.19285	-1.46197	0.00131111
ENSG00000150893	FREM2	FRAS1 related extracellular matrix protein 2	8.27386	6.8102	-1.46367	0.00027869
ENSG00000275549	STPG3-AS1	STPG3 antisense RNA 1	2.90263	1.43061	-1.47202	0.0275164
ENSG00000253522	MIR3142HG	MIR3142 host gene	3.86608	2.38837	-1.4777	0.0435137
ENSG00000089101	CFAP61	cilia and flagella associated protein 61	1.48193	0	-1.48193	0.00240712
ENSG00000174827	PDZK1	PDZ domain containing 1	11.0648	9.57135	-1.49346	0.000351171
ENSG00000211790	TRAV8-4	T-cell receptor alpha variable 8-4	1.50201	0	-1.50201	0.0159837
ENSG00000152315	KCNK13	potassium two pore domain channel subfamily K member 13	5.27463	3.77039	-1.50425	0.0275914
ENSG00000126787	DLGAP5	DLG associated protein 5	4.22076	2.70722	-1.51354	0.0344897
ENSG00000278292	RFPL4AP6	ret finger protein like 4A pseudogene 6	1.51375	0	-1.51375	0.0155996
ENSG00000237510	GPAT2P1	glycerol-3-phosphate acyltransferase 2 pseudogene 1	1.51895	0	-1.51895	0.0149096
ENSG00000183729	NPBWR1	neuropeptides B and W receptor 1	4.47982	2.95415	-1.52567	0.00878915
ENSG00000072315	TRPC5	transient receptor potential cation channel subfamily C member 5	5.77203	4.24512	-1.52691	0.00373413
ENSG00000162068	NTN3	netrin 3	1.52915	0	-1.52915	0.00234501
ENSG00000214264	KCTD9P4	potassium channel tetramerization domain containing 9 pseudogene 4	3.10936	1.57767	-1.53169	0.0210945
ENSG00000178662	CSRNP3	cysteine and serine rich nuclear protein 3	5.83155	4.28625	-1.5453	0.0298697
ENSG00000233013	FAM157B	family with sequence similarity 157 member B (non-protein coding)	1.54712	0	-1.54712	0.0131651
ENSG00000164512	ANKRD55	ankyrin repeat domain 55	6.1756	4.6252	-1.5504	0.00183762
ENSG00000152254	G6PC2	glucose-6-phosphatase catalytic subunit 2	1.55665	0	-1.55665	0.00564944
ENSG00000145708	CRHBP	corticotropin releasing hormone binding protein	11.4969	9.92566	-1.57128	0.0344001
ENSG00000161649	CD300LG	CD300 molecule like family member g	4.17464	2.58491	-1.58973	0.00719443
ENSG00000134042	MRO	maestro	8.32333	6.72981	-1.59352	7.08e-06
ENSG00000134240	HMGCS2	3-hydroxy-3-methylglutaryl-CoA synthase 2	14.3	12.6983	-1.60174	0.0138505
ENSG00000156970	BUB1B	BUB1 mitotic checkpoint serine/threonine kinase B	4.32036	2.70913	-1.61123	0.0387414
ENSG00000158402	CDC25C	cell division cycle 25C	2.39618	0.782638	-1.61355	0.0326277
ENSG00000253661	ZFHX4-AS1	ZFHX4 antisense RNA 1	2.34146	0.723926	-1.61753	0.0287961
ENSG00000105398	SULT2A1	sulfotransferase family 2A member 1	14.4737	12.8471	-1.62659	0.0277509
ENSG00000188153	COL4A5	collagen type IV alpha 5 chain	7.22604	5.59251	-1.63352	0.00486846
ENSG00000188000	OR7D2	olfactory receptor family 7 subfamily D member 2	2.23913	0.603899	-1.63523	0.0104149
ENSG00000172478	C2orf54	chromosome 2 open reading frame 54	5.39587	3.75656	-1.6393	0.000108459
ENSG00000135870	RC3H1	ring finger and CCCH-type domains 1	9.39266	7.73859	-1.65407	0.0018692
ENSG00000154928	EPHB1	EPH receptor B1	6.39969	4.74243	-1.65726	0.00665382
ENSG00000223656	HMGB3P10	high mobility group box 3 pseudogene 10	2.20361	0.5437	-1.65991	0.00779517
ENSG00000163092	XIRP2	xin actin binding repeat containing 2	1.66158	0	-1.66158	0.00129041
ENSG00000214860	EVPLL	envoplakin like	3.94218	2.27946	-1.66272	0.0304427
ENSG00000100206	DMC1	DNA meiotic recombinase 1	2.42793	0.760275	-1.66765	0.0318704
ENSG00000196208	GREB1	growth regulation by estrogen in breast cancer 1	6.67241	4.9986	-1.67381	0.000229853
ENSG00000236333	TRHDE-AS1	TRHDE antisense RNA 1	5.47777	3.80102	-1.67675	0.0430733
ENSG00000013016	EHD3	EH domain containing 3	9.97759	8.29511	-1.68248	0.000676284
ENSG00000215580	BCORP1	BCL6 corepressor pseudogene 1	2.58305	0.895031	-1.68802	0.00674361
ENSG00000242515	UGT1A10	UDP glucuronosyltransferase family 1 member A10	2.39454	0.664736	-1.7298	0.000321814
ENSG00000101204	CHRNA4	cholinergic receptor nicotinic alpha 4 subunit	8.10675	6.37615	-1.7306	0.00190032
ENSG00000166391	MOGAT2	monoacylglycerol O-acyltransferase 2	10.8102	9.0642	-1.74595	0.0214591
ENSG00000204501	PRAMEF15	PRAME family member 15	1.96906	0.213099	-1.75596	0.012723
ENSG00000262481	TMEM256-PLSCR3	TMEM256-PLSCR3 readthrough (NMD candidate)	2.55138	0.792452	-1.75893	0.00146259
ENSG00000243955	GSTA1	glutathione S-transferase alpha 1	10.9434	9.17458	-1.76885	0.0164172
ENSG00000196104	SPOCK3	SPARC/osteonectin, cwcv and kazal like domains proteoglycan 3	4.19241	2.4046	-1.78781	0.0421062
ENSG00000136011	STAB2	stabilin 2	9.62235	7.8285	-1.79385	0.00229023
ENSG00000140955	ADAD2	adenosine deaminase domain containing 2	1.80613	0	-1.80613	0.00264484
ENSG00000182077	PTCHD3	patched domain containing 3	1.81139	0	-1.81139	0.000776501
ENSG00000109193	SULT1E1	sulfotransferase family 1E member 1	5.74176	3.90964	-1.83212	0.0408805
ENSG00000268738	HSFX2	heat shock transcription factor family, X-linked 2	2.42236	0.581972	-1.84039	0.0027165
ENSG00000164308	ERAP2	endoplasmic reticulum aminopeptidase 2	9.8053	7.95081	-1.8545	0.00389882
ENSG00000100652	SLC10A1	solute carrier family 10 member 1	10.1921	8.30028	-1.8918	0.0458791
ENSG00000224238	WARS2-IT1	WARS2 intronic transcript 1	2.39737	0.502214	-1.89515	0.0140096
ENSG00000133863	TEX15	testis expressed 15, meiosis and synapsis associated	3.4611	1.55922	-1.90188	0.0298274
ENSG00000173402	DAG1	dystroglycan 1	9.33828	7.42553	-1.91275	0.0198813
ENSG00000147570	DNAJC5B	DnaJ heat shock protein family (Hsp40) member C5 beta	3.67923	1.73134	-1.94788	0.0376978
ENSG00000181036	FCRL6	Fc receptor like 6	5.70043	3.73883	-1.9616	0.000192578
ENSG00000229005	HNF4A-AS1	HNF4A antisense RNA 1	6.04322	4.07089	-1.97233	0.033062
ENSG00000242522	KLHL6-AS1	KLHL6 antisense RNA 1	4.47154	2.47827	-1.99327	0.00512335
ENSG00000135220	UGT2A3	UDP glucuronosyltransferase family 2 member A3	10.8799	8.85368	-2.02623	9.92e-08
ENSG00000129195	PIMREG	PICALM interacting mitotic regulator	2.87801	0.846446	-2.03156	0.0202122
ENSG00000154080	CHST9	carbohydrate sulfotransferase 9	9.024	6.97611	-2.04788	3.56e-06
ENSG00000166897	ELFN2	extracellular leucine rich repeat and fibronectin type III domain containing 2	3.32383	1.26833	-2.0555	0.0182617
ENSG00000115616	SLC9A2	solute carrier family 9 member A2	2.66977	0.611899	-2.05787	0.00328722
ENSG00000224616	RTCA-AS1	RTCA antisense RNA 1	3.33803	1.27574	-2.06228	0.0127711
ENSG00000179873	NLRP11	NLR family pyrin domain containing 11	4.43226	2.36888	-2.06338	0.0407672
ENSG00000105392	CRX	cone-rod homeobox	2.06515	0	-2.06515	0.0100744
ENSG00000137878	GCOM1	GRINL1A complex locus 1	5.57628	3.44276	-2.13352	0.0173858
ENSG00000184611	KCNH7	potassium voltage-gated channel subfamily H member 7	4.75497	2.61284	-2.14213	0.0404646
ENSG00000248383	PCDHAC1	protocadherin alpha subfamily C, 1	4.21703	2.07123	-2.1458	3.74e-06
ENSG00000182612	TSPAN10	tetraspanin 10	4.3686	2.20044	-2.16816	0.000181929
ENSG00000115155	OTOF	otoferlin	2.39818	0.227644	-2.17053	0.00207359
ENSG00000167723	TRPV3	transient receptor potential cation channel subfamily V member 3	6.03962	3.86749	-2.17212	0.0136502
ENSG00000197353	LYPD2	LY6/PLAUR domain containing 2	3.53099	1.35479	-2.1762	0.0362426
ENSG00000146147	MLIP	muscular LMNA interacting protein	8.93381	6.72807	-2.20574	0.0209652
ENSG00000203907	OOEP	oocyte expressed protein	2.49756	0.283505	-2.21406	0.00205486
ENSG00000142609	CFAP74	cilia and flagella associated protein 74	5.3822	3.14805	-2.23415	0.0399885
ENSG00000244067	GSTA2	glutathione S-transferase alpha 2	7.42075	5.18565	-2.2351	0.017612
ENSG00000072571	HMMR	hyaluronan mediated motility receptor	5.5581	3.24639	-2.31172	0.00447915
ENSG00000254521	SIGLEC12	sialic acid binding Ig like lectin 12 (gene/pseudogene)	6.33098	3.73971	-2.59127	0.0197269
ENSG00000135476	ESPL1	extra spindle pole bodies like 1, separase	5.78684	3.15664	-2.6302	0.000470405
ENSG00000112984	KIF20A	kinesin family member 20A	5.01836	2.37342	-2.64494	0.000909294
ENSG00000198074	AKR1B10	aldo-keto reductase family 1 member B10	8.7433	6.00611	-2.73718	0.000855769
ENSG00000123496	IL13RA2	interleukin 13 receptor subunit alpha 2	7.27376	4.04169	-3.23207	0.0387256
