# Supplementary material for: Combined Analysis of Expression Profiles in a Mouse Model and Patients Identified BHMT2 as a New Regulator of Lipid Metabolism in Metabolic-Associated Fatty Liver Disease
Source: Front Cell Dev Biol. 2021 Nov 11;9:741710. doi: 10.3389/fcell.2021.741710 (PMC8636031; doi:10.3389/fcell.2021.741710)
Supplement: Supplementary file 8 [file Table7.XLSX]

## Sheet: Sheet1
Table S7.The 11 most significant MCODE components form the PPI network of dfferential genes that removed overlapping genes.
NO	GO	Description	Log10(P)
MCODE 1	R-HSA-69278	Cell Cycle, Mitotic	-26.2
MCODE 1	GO:0051301	cell division	-21.7
MCODE 1	GO:0044772	mitotic cell cycle phase transition	-19.9
MCODE 2	GO:0042254	ribosome biogenesis	-15.98
MCODE 2	GO:0042273	ribosomal large subunit biogenesis	-10.36
MCODE 2	R-HSA-8868773	rRNA processing in the nucleus and cytosol	-10.35
MCODE 3	R-HSA-909733	Interferon alpha/beta signaling	-13.98
MCODE 3	GO:0006631	fatty acid metabolic process	-13.78
MCODE 3	GO:0034341	response to interferon-gamma	-11.38
MCODE 4	GO:0008202	steroid metabolic process	-13.23
MCODE 4	R-HSA-5661231	Metallothioneins bind metals	-10.96
MCODE 4	GO:0032787	monocarboxylic acid metabolic process	-9.48
MCODE 5	ko04360	Axon guidance	-11.06
MCODE 5	GO:0010977	negative regulation of neuron projection development	-8.44
MCODE 5	R-HSA-3928665	EPH-ephrin mediated repulsion of cells	-7.25
MCODE 6	R-HSA-5620924	Intraflagellar transport	-10.92
MCODE 6	GO:0035735	intraciliary transport involved in cilium assembly	-7.97
MCODE 9	WP4537	Hippo-Yap signaling pathway	-10.93
MCODE 9	WP2857	Mesodermal Commitment Pathway	-7.53
MCODE 9	GO:0030855	epithelial cell differentiation	-4.71
MCODE 10	GO:0007601	visual perception	-4.82
MCODE 10	GO:1901605	alpha-amino acid metabolic process	-4.74
MCODE 11	GO:0048010	vascular endothelial growth factor receptor signaling pathway	-8.75
MCODE 11	R-HSA-109582	Hemostasis	-7.63
MCODE 11	WP2865	IL1 and megakaryocytes in obesity	-6.52
