# Supplementary material for: Combined Analysis of Expression Profiles in a Mouse Model and Patients Identified BHMT2 as a New Regulator of Lipid Metabolism in Metabolic-Associated Fatty Liver Disease
Source: Front Cell Dev Biol. 2021 Nov 11;9:741710. doi: 10.3389/fcell.2021.741710 (PMC8636031; doi:10.3389/fcell.2021.741710)
Supplement: Supplementary file 9 [file Table8.XLSX]

## Sheet: Sheet1
Table S8.RNAseq data of liver tissues of MAFLD patients and controls in GSE48452(P<0.05)
ID	adj.P.Val	P.Value	t	B	logFC	Gene.symbol	Gene.title
8006634	0.0818	1.23e-05	-5.65434	2.8899	-0.603166	PIGW	phosphatidylinositol glycan anchor biosynthesis class W
7978666	0.1394	2.93e-05	-5.28312	2.1967	-0.549597	MBIP	MAP3K12 binding inhibitory protein 1
8135064	0.1625	4.87e-05	5.06862	1.7877	0.387099	TRIM56	tripartite motif containing 56
7973371	0.1625	5.89e-05	-4.98858	1.6336	-0.491098	C14orf119	chromosome 14 open reading frame 119
8019924	0.1625	6.04e-05	-4.97793	1.613	-0.562384	MYL12A	myosin light chain 12A
7910901	0.1921	0.000102	-4.76084	1.1914	-0.50363	LOC100130331	POTE ankyrin domain family, member F pseudogene
8029347	0.1921	0.000117	-4.70119	1.0747	-0.373571	ZNF230	zinc finger protein 230
8027254	0.1921	0.000126	-4.6696	1.0128	-0.444075	ZNF90	zinc finger protein 90
7965471	0.206	0.000169	-4.54824	0.7741	-0.384469	UBE2N	ubiquitin conjugating enzyme E2 N
8121850	0.206	0.000173	-4.54001	0.7579	-0.729692	HEY2	hes related family bHLH transcription factor with YRPW motif 2
7920047	0.206	0.000189	-4.50261	0.6841	-0.332859	MRPL9	mitochondrial ribosomal protein L9
7906978	0.206	0.000211	-4.45556	0.5912	-0.453496	MGST3///MGST3	microsomal glutathione S-transferase 3///microsomal glutathione S-transferase 3
8071823	0.206	0.000224	4.43239	0.5454	0.417079	CABIN1	calcineurin binding protein 1
7951157	0.206	0.000249	4.38846	0.4584	0.769698	CCDC82	REX1, RNA exonuclease 1 homolog-like 1, pseudogene
7924445	0.206	0.000257	4.37442	0.4306	0.48055	C1orf140	uncharacterized LOC400804
8160816	0.206	0.000276	4.34549	0.3732	0.644796	ENHO	energy homeostasis associated
8139281	0.206	0.000285	4.33124	0.345	0.530606	POLM	DNA polymerase mu
8023920	0.206	0.000297	-4.31445	0.3116	-0.560101	TXNL4A	thioredoxin like 4A
8126770	0.2066	0.000304	-4.3047	0.2923	-0.656607	CYP39A1	cytochrome P450 family 39 subfamily A member 1
8154836	0.2068	0.000311	-4.29599	0.275	-0.771107	ANXA2P2///ANXA2	annexin A2 pseudogene 2///annexin A2
8069574	0.2094	0.000334	-4.26623	0.2159	-0.641739	C21orf91	chromosome 21 open reading frame 91
7964292	0.2094	0.000348	4.24855	0.1808	0.565337	RDH16	retinol dehydrogenase 16 (all-trans)
8112121	0.2094	0.000396	-4.19463	0.0736	-0.452014	SLC38A9///SLC38A9	solute carrier family 38 member 9///solute carrier family 38 member 9
8085660	0.2094	0.000401	-4.18984	0.064	-0.47174	DPH3	diphthamide biosynthesis 3
8164155	0.2094	0.000439	-4.15217	-0.0109	-0.381135	PPP6C	protein phosphatase 6 catalytic subunit
8092321	0.2094	0.000444	-4.14749	-0.0202	-0.587897	DCUN1D1	defective in cullin neddylation 1 domain containing 1
8037513	0.2094	0.00049	4.10643	-0.102	0.485384	EXOC3L2	exocyst complex component 3 like 2
8022404	0.2094	0.000493	-4.10375	-0.1073	-0.546358	FAM210A	family with sequence similarity 210 member A
8005785	0.2094	0.000506	4.09358	-0.1276	0.429499	KSR1	kinase suppressor of ras 1
8030978	0.2094	0.000507	-4.09239	-0.1299	-0.798157	ZNF845	zinc finger protein 845
8142110	0.2094	0.000513	-4.08732	-0.14	-0.402768	SYPL1	synaptophysin like 1
7946128	0.2094	0.000518	4.08323	-0.1482	0.526777	FAM160A2	family with sequence similarity 160 member A2
8171823	0.2094	0.000522	-4.08074	-0.1531	-0.468708	APOO	apolipoprotein O
8048523	0.2094	0.000561	4.05073	-0.2129	0.390601	DNAJB2	DnaJ heat shock protein family (Hsp40) member B2
8169352	0.2094	0.000565	-4.04717	-0.22	-0.515337	NXT2	nuclear transport factor 2 like export factor 2
7989708	0.2094	0.000568	-4.04551	-0.2233	-0.430093	MTFMT	mitochondrial methionyl-tRNA formyltransferase
7946288	0.2094	0.00057	-4.04397	-0.2264	-0.370726	ZNF214	zinc finger protein 214
8058509	0.2094	0.000576	-4.03958	-0.2351	-0.499571	PLEKHM3	pleckstrin homology domain containing M3
8105111	0.2094	0.000576	-4.03944	-0.2354	-0.49564	FBXO4	F-box protein 4
8013515	0.2094	0.000578	4.03795	-0.2383	0.617131	C17orf51	chromosome 17 open reading frame 51
7910398	0.2094	0.000595	-4.02625	-0.2617	-0.592862	SPHAR///RAB4A	S-phase response (cyclin related)///RAB4A, member RAS oncogene family
7969488	0.2094	0.000601	-4.02188	-0.2704	-0.452879	CLN5	ceroid-lipofuscinosis, neuronal 5
7916262	0.2094	0.000602	-4.02091	-0.2723	-0.279563	C1orf123///CPT2	chromosome 1 open reading frame 123///carnitine palmitoyltransferase 2
7973813	0.2094	0.000603	-4.02053	-0.273	-0.446434	AP4S1	adaptor related protein complex 4 sigma 1 subunit
7919251	0.2094	0.000603	-4.02011	-0.2739	-0.492973	GPR89A///GPR89B	ZXD family zinc finger C
8041763	0.2094	0.000607	4.01741	-0.2793	0.779177	PRKCE	protein kinase C epsilon
8000482	0.2094	0.000608	4.0173	-0.2795	0.278082	XPO6	exportin 6
7942715	0.2094	0.000644	3.99275	-0.3284	0.719345	OMP	olfactory marker protein
8118498	0.2094	0.000645	3.99249	-0.3289	0.807204	CYP21A1P///CYP21A2	cytochrome P450 family 21 subfamily A member 1, pseudogene///cytochrome P450 family 21 subfamily A member 2
7945275	0.2094	0.000653	3.98755	-0.3387	0.303347	VPS26B	VPS26, retromer complex component B
8027584	0.2094	0.000658	3.98401	-0.3458	0.481013	KCTD15	potassium channel tetramerization domain containing 15
8042335	0.2094	0.00066	-3.98309	-0.3476	-0.426251	VDAC2	voltage dependent anion channel 2
7981078	0.2094	0.000666	-3.97934	-0.3551	-0.482425	SERPINA11	serpin family A member 11
8171066	0.2094	0.000681	3.96967	-0.3743	0.61995	LOC100288778///WASH1///WASH7P///WASH2P///WASH3P	mucin 21, cell surface associated
8057045	0.2094	0.000691	-3.96364	-0.3863	-0.513681	FKBP7	FK506 binding protein 7
7934789	0.2094	0.000696	3.96081	-0.392	0.996389	GRID1	glutamate ionotropic receptor delta type subunit 1
7924058	0.2094	0.0007	-3.95846	-0.3967	-0.484081	IRF6	interferon regulatory factor 6
8141803	0.2094	0.000713	3.95098	-0.4116	0.551479	RASA4CP///RASA4	DENN domain containing 1B
8115666	0.2094	0.000714	-3.95021	-0.4131	-0.420176	NUDCD2	NudC domain containing 2
8112312	0.2094	0.000718	-3.94798	-0.4175	-0.527064	DIMT1	DIM1 dimethyladenosine transferase 1 homolog
8074131	0.2094	0.000729	3.94132	-0.4308	0.461036	SHANK3	SH3 and multiple ankyrin repeat domains 3
8006736	0.2094	0.000734	-3.93863	-0.4362	-0.379249	DUSP14	dual specificity phosphatase 14
7947221	0.2094	0.000741	-3.93472	-0.444	-0.574835	LIN7C	lin-7 homolog C, crumbs cell polarity complex component
8016259	0.2094	0.000742	3.9341	-0.4452	0.927938	LRRC37A2///LRRC37A3///LRRC37A	uncharacterized LOC102724238///glioblastoma down-regulated RNA
8090840	0.212	0.000763	-3.92242	-0.4684	-0.438906	RYK	receptor-like tyrosine kinase
7901316	0.212	0.000774	3.91633	-0.4806	0.628413	SLC5A9	solute carrier family 5 member 9
7902565	0.212	0.000775	-3.91582	-0.4816	-0.434576	ADGRL2	adhesion G protein-coupled receptor L2
8019046	0.212	0.000777	-3.91519	-0.4829	-0.359055	EIF4A3	eukaryotic translation initiation factor 4A3
8094938	0.2156	0.000806	-3.89995	-0.5132	-0.698128	NIPAL1	NIPA like domain containing 1
8049752	0.2156	0.000842	3.8816	-0.5497	0.628671	SNED1	sushi, nidogen and EGF like domains 1
7927146	0.2156	0.000859	-3.87311	-0.5666	-0.512276	CSGALNACT2	chondroitin sulfate N-acetylgalactosaminyltransferase 2
8142697	0.2156	0.000863	-3.87126	-0.5703	-0.626248	POT1	protection of telomeres 1
8019273	0.2156	0.000865	-3.87006	-0.5727	-0.4448	ALYREF	RNA polymerase II subunit M
7992639	0.2156	0.00087	3.86811	-0.5766	0.724727	TBC1D24	TBC1 domain family member 24
8083000	0.2156	0.00088	-3.86307	-0.5866	-0.518829	FAIM	Fas apoptotic inhibitory molecule
7918634	0.2197	0.000917	-3.84595	-0.6207	-0.459074	PHTF1	putative homeodomain transcription factor 1
8112570	0.2238	0.00095	-3.83143	-0.6496	-0.314704	MRPS27	mitochondrial ribosomal protein S27
7930120	0.2238	0.000954	3.82928	-0.6539	0.286243	SUFU	SUFU negative regulator of hedgehog signaling
8004842	0.2321	0.001	3.80857	-0.6951	0.389296	ARHGEF15	Rho guanine nucleotide exchange factor 15
8042207	0.2321	0.00101	-3.80467	-0.7028	-0.326387	COMMD1	copper metabolism domain containing 1
8067985	0.2321	0.00101	3.80381	-0.7045	1.59723	NCAM2	neural cell adhesion molecule 2
8098414	0.2321	0.00102	-3.80174	-0.7086	-0.612464	SPCS3	signal peptidase complex subunit 3
8079140	0.2321	0.00104	-3.79297	-0.7261	-0.419957	SNRK	SNF related kinase
8057615	0.2321	0.00105	3.79061	-0.7308	0.450962	DIRC1	disrupted in renal carcinoma 1
8135931	0.2321	0.00105	3.78855	-0.7349	0.679207	LINC01000	long intergenic non-protein coding RNA 1000
7978838	0.2339	0.00107	-3.78249	-0.7469	-0.511955	DNAAF2	dynein axonemal assembly factor 2
8101648	0.2339	0.00108	-3.77931	-0.7532	-0.74358	HSD17B11	hydroxysteroid 17-beta dehydrogenase 11
8174026	0.2414	0.00114	-3.75583	-0.7999	-0.49871	YWHAQP8	YWHAQ pseudogene 8
8021542	0.2415	0.00115	3.75111	-0.8093	0.320769	ZCCHC2	zinc finger CCHC-type containing 2
8060604	0.2415	0.00117	3.74463	-0.8222	1.10515	OXT	oxytocin/neurophysin I prepropeptide
8170009	0.2415	0.00117	-3.74387	-0.8237	-0.475157	FAM127A	family with sequence similarity 127 member A
8129562	0.2415	0.00119	-3.73602	-0.8393	-1.11467	CTGF	connective tissue growth factor
7915846	0.2415	0.0012	3.73364	-0.844	0.385864	MKNK1	MAP kinase interacting serine/threonine kinase 1
8108435	0.2415	0.0012	-3.73317	-0.8449	-0.278463	UBE2D2	ubiquitin conjugating enzyme E2 D2
7961983	0.2415	0.0012	-3.73228	-0.8467	-0.490625	TM7SF3	transmembrane 7 superfamily member 3
7906819	0.2419	0.00123	-3.72492	-0.8613	-0.430363	ATF6	activating transcription factor 6
7910001	0.2419	0.00125	-3.71788	-0.8753	-0.397075	DEGS1	delta 4-desaturase, sphingolipid 1
8079131	0.2419	0.00127	3.70897	-0.893	0.65893	FAM198A	family with sequence similarity 198 member A
7993872	0.2419	0.00127	-3.70846	-0.894	-0.318006	UQCRC2	ubiquinol-cytochrome c reductase core protein II
8113616	0.2419	0.00128	-3.70698	-0.8969	-0.5034	FEM1C	fem-1 homolog C
7963590	0.2419	0.00128	3.7056	-0.8997	0.88544	CSAD	cysteine sulfinic acid decarboxylase
7899774	0.2419	0.00129	-3.7049	-0.9011	-0.447714	HDAC1	histone deacetylase 1
7943218	0.2435	0.00131	-3.69744	-0.9159	-0.392751	PANX1	pannexin 1
8123463	0.2464	0.00134	-3.68785	-0.9349	-0.470432	C6orf120///PHF10	chromosome 6 open reading frame 120///PHD finger protein 10
8041561	0.2464	0.00135	-3.68601	-0.9385	-0.635308	MORN2	MORN repeat containing 2
7962537	0.2464	0.00135	-3.68375	-0.943	-0.939686	SLC38A2	solute carrier family 38 member 2
8131265	0.2464	0.00137	3.67757	-0.9553	0.382502	AP5Z1	adaptor related protein complex 5 zeta 1 subunit
8173732	0.2464	0.00138	-3.67482	-0.9608	-0.371444	TAF9B	TATA-box binding protein associated factor 9b
8007471	0.2464	0.00138	-3.67411	-0.9622	-0.348207	NBR1	NBR1, autophagy cargo receptor
8017810	0.2472	0.0014	-3.66969	-0.9709	-0.444588	PSMD12	proteasome 26S subunit, non-ATPase 12
8067017	0.2472	0.0014	-3.66837	-0.9735	-0.713582	DPM1	dolichyl-phosphate mannosyltransferase subunit 1, catalytic
8139534	0.2477	0.00141	3.66522	-0.9798	0.311163	PKD1L1	polycystin 1 like 1, transient receptor potential channel interacting
7958666	0.2539	0.00146	-3.65274	-1.0045	-0.305974	GPN3///FAM216A	GPN-loop GTPase 3///family with sequence similarity 216 member A
8022674	0.254	0.00146	-3.65025	-1.0095	-0.418377	CDH2	cadherin 2
7969177	0.2596	0.00151	-3.63625	-1.0372	-0.376291	ST13P4	suppression of tumorigenicity 13 (colon carcinoma) (Hsp70 interacting protein) pseudogene 4
7958000	0.2596	0.00152	-3.63476	-1.0402	-0.427416	CHPT1	choline phosphotransferase 1
7961507	0.2616	0.00156	-3.62421	-1.061	-0.609768	ART4	ADP-ribosyltransferase 4 (Dombrock blood group)
7911458	0.2616	0.00158	3.61893	-1.0715	0.477604	ACAP3	ArfGAP with coiled-coil, ankyrin repeat and PH domains 3
7957540	0.2616	0.00158	-3.61764	-1.0741	-0.724276	MRPL42	mitochondrial ribosomal protein L42
8134644	0.2616	0.00159	3.61714	-1.075	0.32194	ZSCAN25	zinc finger and SCAN domain containing 25
7920123	0.2616	0.0016	-3.61285	-1.0835	-0.586924	S100A10	S100 calcium binding protein A10
7938118	0.2616	0.00161	3.61178	-1.0857	0.854453	DNHD1	casein kinase 2 beta
7974566	0.2616	0.00162	-3.60767	-1.0938	-0.412123	AP5M1	adaptor related protein complex 5 mu 1 subunit
7938348	0.2616	0.00163	-3.60594	-1.0972	-0.739216	WEE1	G protein-coupled receptor 89A///G protein-coupled receptor 89B
7956658	0.2616	0.00166	-3.5983	-1.1123	-0.942373	SLC16A7	solute carrier family 16 member 7
8002969	0.2616	0.00166	3.59824	-1.1125	0.408912	MAF	MAF bZIP transcription factor
8069122	0.2616	0.00167	3.59591	-1.1171	0.384875	LRRC3	leucine rich repeat containing 3
8148597	0.2616	0.0017	3.58713	-1.1344	0.330598	ZFP41	ZFP41 zinc finger protein
7917896	0.2616	0.00171	-3.58449	-1.1396	-0.281506	ALG14	ALG14, UDP-N-acetylglucosaminyltransferase subunit
7902512	0.2616	0.00172	-3.58269	-1.1432	-0.562229	DNAJB4	DnaJ heat shock protein family (Hsp40) member B4
8035639	0.2616	0.00172	3.58243	-1.1437	0.85978	HAPLN4	hyaluronan and proteoglycan link protein 4
8163999	0.2616	0.00174	-3.57872	-1.1511	-0.354885	ZBTB6	zinc finger and BTB domain containing 6
7916225	0.2616	0.00175	-3.5756	-1.1572	-0.516083	RPS13	ribosome production factor 2 homolog
8081945	0.2616	0.00176	-3.57414	-1.1601	-0.380078	NDUFB4	NADH:ubiquinone oxidoreductase subunit B4
8147375	0.2616	0.00177	-3.57095	-1.1664	-0.569159	DPY19L4	dpy-19 like 4 (C. elegans)
8161270	0.2616	0.00177	3.57012	-1.1681	0.838663	ANKRD18A	ankyrin repeat domain 18A
8020827	0.2616	0.0018	3.56441	-1.1793	0.912236	MEP1B	meprin A subunit beta
8169645	0.2616	0.0018	-3.5641	-1.18	-0.433276	UBE2A	ubiquitin conjugating enzyme E2 A
8122818	0.2616	0.00182	-3.55911	-1.1898	-0.500081	ARMT1	acidic residue methyltransferase 1
8149475	0.2616	0.00183	-3.55785	-1.1923	-0.388616	CNOT7	CCR4-NOT transcription complex subunit 7
7993035	0.2616	0.00184	3.55429	-1.1993	0.335601	UBN1	ubinuclein 1
7922402	0.2616	0.00184	-3.55376	-1.2004	-0.588399	GAS5///SNORD47	growth arrest specific 5 (non-protein coding)///small nucleolar RNA, C/D box 47
8027390	0.2616	0.00185	-3.55126	-1.2053	-0.50373	POP4	POP4 homolog, ribonuclease P/MRP subunit
7977621	0.2616	0.00186	-3.55002	-1.2078	-0.339389	NDRG2	NDRG family member 2
8029640	0.2616	0.00187	3.54701	-1.2137	0.409981	BLOC1S3	biogenesis of lysosomal organelles complex 1 subunit 3
7980523	0.2616	0.00189	-3.54286	-1.2219	-0.406922	GTF2A1	general transcription factor IIA subunit 1
8125780	0.2616	0.00189	3.54259	-1.2224	1.05212	IP6K3	inositol hexakisphosphate kinase 3
7999727	0.2616	0.0019	3.54212	-1.2234	0.584885	ABCC6	ATP binding cassette subfamily C member 6
8084923	0.2616	0.00192	3.53676	-1.2339	1.16425	LINC00885	long intergenic non-protein coding RNA 885
7997491	0.2616	0.00196	-3.527	-1.2532	-0.488932	HSD17B2	hydroxysteroid 17-beta dehydrogenase 2
7969574	0.2616	0.00199	-3.52126	-1.2645	-0.538617	MIR622///KRT18	microRNA 622///keratin 18
8143957	0.2616	0.002	-3.51961	-1.2678	-0.639025	RHEB	Ras homolog enriched in brain
8056943	0.2616	0.00201	-3.5164	-1.2741	-0.346169	LNPK	lunapark, ER junction formation factor
7990545	0.2616	0.00202	3.51472	-1.2774	0.427731	CSPG4	chondroitin sulfate proteoglycan 4
8016300	0.2616	0.00202	3.5146	-1.2777	0.614017	ARL17B///ARL17A///NBR2	variable charge, X-linked 3B///variable charge, Y-linked 1B///variable charge, X-linked 3A///variable charge, Y-linked
8129666	0.2616	0.00204	-3.511	-1.2848	-0.76609	SLC2A12	solute carrier family 2 member 12
8150830	0.2616	0.00207	-3.50434	-1.2979	-0.527496	LYPLA1	lysophospholipase I
7989335	0.2616	0.00208	-3.50324	-1.3001	-0.610341	ANXA2	annexin A2
8126248	0.2616	0.0021	3.4981	-1.3102	0.878438	UNC5CL	unc-5 family C-terminal like
8140386	0.2633	0.00214	-3.49037	-1.3254	-0.293605	STYXL1	serine/threonine/tyrosine interacting-like 1
7942261	0.2649	0.00219	3.48172	-1.3425	0.404247	KRTAP5-9	keratin associated protein 5-9
7948643	0.2649	0.00221	3.47724	-1.3513	0.456598	RAB3IL1	RAB3A interacting protein like 1
8106181	0.2649	0.00224	-3.47133	-1.3629	-0.244198	BTF3	basic transcription factor 3
8032037	0.2649	0.00225	3.46976	-1.366	0.481753	SHC2	SHC adaptor protein 2
8007141	0.2649	0.00226	-3.46741	-1.3706	-0.315911	EIF1	eukaryotic translation initiation factor 1
8114443	0.2649	0.00226	-3.46739	-1.3707	-0.398965	ETF1	eukaryotic translation termination factor 1
8052934	0.2649	0.00227	-3.46658	-1.3723	-0.373614	MCEE	methylmalonyl-CoA epimerase
7978756	0.2683	0.00232	3.45674	-1.3916	0.307789	FSCB	fibrous sheath CABYR binding protein
7949275	0.2689	0.00233	3.45429	-1.3964	0.402875	MIR194-2	microRNA 194-2
8093013	0.2736	0.00238	3.44559	-1.4135	0.447141	TNK2	tyrosine kinase non receptor 2
8119722	0.2747	0.0024	3.44246	-1.4197	0.337931	CUL9	cullin 9
8159790	0.2791	0.00246	3.43282	-1.4386	0.509746	LOC100288778///WASH1///LOC100134445///WASH7P///WASH5P///WASH2P///WASH3P	olfactory receptor family 2 subfamily T member 35///olfactory receptor family 2 subfamily T member 2
7897305	0.2792	0.00247	3.43116	-1.4419	0.333078	ZBTB48	zinc finger and BTB domain containing 48
8005809	0.2802	0.00249	3.42708	-1.4499	0.432494	LGALS9	galectin 9
8063531	0.2802	0.00249	3.42678	-1.4505	0.4778	FAM209B	family with sequence similarity 209 member B
8016371	0.2809	0.00251	3.42291	-1.4581	0.504137	SCRN2	secernin 2
7977058	0.2813	0.00254	-3.41893	-1.4659	-0.464627	EIF5	eukaryotic translation initiation factor 5
8085531	0.2813	0.00254	3.41811	-1.4675	0.428319	MRPS25	mitochondrial ribosomal protein S25
7957746	0.2813	0.00254	-3.41804	-1.4676	-0.291382	SLC25A3	solute carrier family 25 member 3
7927120	0.2817	0.00256	3.4156	-1.4724	0.846313	RET	ret proto-oncogene
8165995	0.2817	0.00257	-3.41334	-1.4769	-0.457944	HCCS	holocytochrome c synthase
8093494	0.2817	0.00259	3.41038	-1.4827	0.625936	CRIPAK	cysteine rich PAK1 inhibitor
8080320	0.2817	0.0026	3.40928	-1.4848	0.494898	NISCH	nischarin
7939465	0.2817	0.00262	-3.40568	-1.4919	-0.395563	HSD17B12	hydroxysteroid 17-beta dehydrogenase 12
7947199	0.2817	0.00263	-3.40356	-1.4961	-0.411692	LGR4	leucine rich repeat containing G protein-coupled receptor 4
8148467	0.2817	0.00264	-3.40233	-1.4985	-0.263943	CHRAC1	chromatin accessibility complex 1
7992347	0.2817	0.00265	3.40069	-1.5017	0.503575	MAPK8IP3	mitogen-activated protein kinase 8 interacting protein 3
8155026	0.2817	0.00267	3.39717	-1.5086	0.219032	ATP8B5P	ATPase phospholipid transporting 8B5, pseudogene
7968056	0.2817	0.00268	3.39626	-1.5104	0.27517	TPTE2P6	transmembrane phosphoinositide 3-phosphatase and tensin homolog 2 pseudogene 6
8018673	0.2817	0.00268	3.39559	-1.5117	0.60901	QRICH2	glutamine rich 2
7968297	0.2817	0.00268	-3.39553	-1.5118	-0.35889	POMP	proteasome maturation protein
7983381	0.2817	0.00268	-3.3955	-1.5119	-0.352531	TERB2	telomere repeat binding bouquet formation protein 2
7977820	0.2825	0.00271	-3.39123	-1.5202	-0.250609	PRMT5	protein arginine methyltransferase 5
8148265	0.2825	0.00272	-3.38899	-1.5246	-0.457381	RNF139	ring finger protein 139
7926223	0.2825	0.00273	3.38765	-1.5272	0.469731	CAMK1D	calcium/calmodulin dependent protein kinase ID
8004057	0.2842	0.00276	3.38387	-1.5347	0.394043	KIF1C	kinesin family member 1C
7961102	0.2848	0.00278	3.38102	-1.5402	0.495985	CLEC1B	C-type lectin domain family 1 member B
8014199	0.2848	0.00278	3.38	-1.5422	0.267827	RAD51D	RAD51 paralog D
7951077	0.2848	0.00279	-3.37902	-1.5442	-0.410518	SESN3	sestrin 3
8154725	0.286	0.00282	-3.37427	-1.5535	-0.491658	KRT18	keratin 18
7988208	0.286	0.00283	3.37318	-1.5556	0.47005	CATSPER2P1	cation channel sperm associated 2 pseudogene 1
8083240	0.286	0.00283	-3.373	-1.5559	-0.672066	AGTR1	angiotensin II receptor type 1
7944006	0.286	0.00286	-3.36788	-1.566	-0.555354	RBM7	RNA binding motif protein 7
8174076	0.286	0.00288	-3.36581	-1.57	-0.53265	GLA	galactosidase alpha
7939068	0.286	0.00288	-3.36532	-1.571	-0.492695	RPS25	ribosomal protein S25
7926896	0.286	0.00288	-3.36476	-1.5721	-0.375307	CKS1B	uncharacterized LOC101926935///family with sequence similarity 182 member B///family with sequence similarity 182 member A
8175683	0.286	0.00289	3.36364	-1.5743	0.637284	MIR224///GABRE	microRNA 224///gamma-aminobutyric acid type A receptor epsilon subunit
8104220	0.286	0.0029	3.36218	-1.5771	0.321484	CEP72	centrosomal protein 72
8162624	0.286	0.00291	-3.36092	-1.5796	-0.769509	AAED1	AhpC/TSA antioxidant enzyme domain containing 1
7915870	0.286	0.00291	-3.36072	-1.58	-0.30144	ATPAF1	ATP synthase mitochondrial F1 complex assembly factor 1
7991835	0.2861	0.00295	-3.3555	-1.5902	-0.286229	RPL23AP5///RPL23A	ribosomal protein L23a pseudogene 5///ribosomal protein L23a
7949995	0.2862	0.00298	-3.3508	-1.5994	-0.461743	MRPL21	mitochondrial ribosomal protein L21
7946728	0.2862	0.00299	-3.34932	-1.6023	-0.358278	PSMA1	proteasome subunit alpha 1
8007043	0.2862	0.00299	3.34886	-1.6032	1.02256	RAPGEFL1	Rap guanine nucleotide exchange factor like 1
8001816	0.2862	0.00301	3.34714	-1.6065	0.801523	BEAN1	brain expressed, associated with NEDD4, 1
7965627	0.2862	0.00302	-3.34559	-1.6096	-0.325926	LTA4H	leukotriene A4 hydrolase
7944262	0.2862	0.00303	3.34367	-1.6133	0.586032	KMT2A	immunoglobulin kappa constant
7934278	0.2862	0.00305	-3.34117	-1.6182	-1.39271	P4HA1	prolyl 4-hydroxylase subunit alpha 1
7939424	0.2862	0.00305	-3.3407	-1.6191	-0.453428	API5	apoptosis inhibitor 5
8098877	0.2862	0.00308	3.33718	-1.626	0.453999	LOC100130872	uncharacterized LOC100130872
8067167	0.2862	0.00309	-3.33579	-1.6287	-0.566895	AURKA	aurora kinase A
8033025	0.2862	0.00309	3.33516	-1.6299	0.31909	DUS3L	dihydrouridine synthase 3 like
7950644	0.2862	0.0031	-3.33391	-1.6324	-0.359791	NDUFC2	NADH:ubiquinone oxidoreductase subunit C2
8089082	0.2862	0.00311	-3.33296	-1.6342	-0.270248	DCBLD2	discoidin, CUB and LCCL domain containing 2
8067727	0.2862	0.00311	3.33201	-1.6361	0.293443	ARFRP1	ADP ribosylation factor related protein 1
8089034	0.2862	0.00312	-3.33142	-1.6372	-0.462719	ARMC10	armadillo repeat containing 10
8073633	0.2872	0.00315	3.32692	-1.646	0.760533	PNPLA3	patatin like phospholipase domain containing 3
8142120	0.2872	0.00316	-3.32626	-1.6473	-0.771237	NAMPT	tetratricopeptide repeat domain 39C
7950501	0.2948	0.00328	3.30955	-1.6799	0.476402	GDPD5	glycerophosphodiester phosphodiesterase domain containing 5
8081036	0.296	0.00331	-3.30634	-1.6862	-0.531448	CADM2	cell adhesion molecule 2
8131140	0.2986	0.00337	3.29822	-1.702	0.399171	LOC101927181	uncharacterized LOC101927181
8131441	0.2995	0.0034	-3.2953	-1.7077	-0.549285	LOC100419773	zinc finger protein 33B pseudogene
7938263	0.2995	0.00341	-3.29328	-1.7116	-0.384197	EIF3F	ZXD family zinc finger C
8088526	0.2995	0.00344	-3.28956	-1.7189	-0.45684	THOC7	THO complex 7
8116012	0.2995	0.00344	3.28923	-1.7195	0.401061	MXD3	MAX dimerization protein 3
7982206	0.2995	0.00346	3.28721	-1.7234	0.676992	GOLGA8O///GOLGA8T///GOLGA8J///GOLGA8N///GOLGA8IP	golgin A8 family member O///golgin A8 family member T///golgin A8 family member J///golgin A8 family member N///golgin A8 family member I, pseudogene
7960117	0.2995	0.00349	-3.28338	-1.7309	-0.312496	PXMP2	uncharacterized LOC642980
8071713	0.2995	0.00351	3.28149	-1.7346	0.269185	FBXW4P1	F-box and WD repeat domain containing 4 pseudogene 1
8121502	0.2995	0.00353	-3.27922	-1.739	-0.635545	GTF3C6	general transcription factor IIIC subunit 6
8103722	0.2995	0.00355	-3.27619	-1.7449	-0.554177	HSP90AA6P	heat shock protein 90 alpha family class A member 6, pseudogene
7902227	0.2995	0.00356	3.2747	-1.7478	0.445975	GADD45A	growth arrest and DNA damage inducible alpha
8088167	0.2995	0.00356	-3.2746	-1.748	-0.564072	SELK	selenoprotein K
8175811	0.2995	0.00357	-3.27377	-1.7496	-0.349792	FAM58A	family with sequence similarity 58 member A
7900216	0.2995	0.00359	-3.27205	-1.7529	-0.37529	AKIRIN1	akirin 1
7902290	0.2995	0.00359	-3.27184	-1.7533	-0.79748	CTH	cystathionine gamma-lyase
7951259	0.2995	0.0036	3.27002	-1.7569	0.235166	MMP10	matrix metallopeptidase 10
8060353	0.2995	0.00361	3.26946	-1.758	0.464584	RBCK1	RANBP2-type and C3HC4-type zinc finger containing 1
8086555	0.2995	0.00362	-3.26848	-1.7599	-0.421229	LZTFL1	leucine zipper transcription factor like 1
8163185	0.2995	0.00365	-3.2646	-1.7674	-0.52722	TXN	thioredoxin
7966321	0.2995	0.00368	-3.26096	-1.7745	-0.465857	GPN3	GPN-loop GTPase 3
8030557	0.2995	0.00369	3.26004	-1.7763	0.673083	ATF5	activating transcription factor 5
7936727	0.2997	0.00371	-3.25802	-1.7802	-0.417959	RPL21P28///RPL21	eukaryotic translation initiation factor 5A-like 1///eukaryotic translation initiation factor 5A
8145281	0.2997	0.00371	3.25724	-1.7817	0.397463	SLC25A37	dynein heavy chain domain 1
7912670	0.3	0.00373	-3.25526	-1.7856	-0.474414	UQCRHL///UQCRH	ubiquinol-cytochrome c reductase hinge protein like///ubiquinol-cytochrome c reductase hinge protein
7950197	0.3002	0.00374	3.25395	-1.7881	0.335779	ARAP1	ArfGAP with RhoGAP domain, ankyrin repeat and PH domain 1
8055688	0.3005	0.00376	-3.25145	-1.793	-0.885424	RND3	Rho family GTPase 3
8117120	0.3005	0.00376	-3.25139	-1.7931	-0.359893	ID4	inhibitor of DNA binding 4, HLH protein
7930304	0.3018	0.00379	-3.24854	-1.7986	-0.495904	GSTO1	glutathione S-transferase omega 1
8143028	0.3027	0.00384	-3.24248	-1.8104	-0.315771	CHCHD3	coiled-coil-helix-coiled-coil-helix domain containing 3
7921319	0.3027	0.00389	3.23735	-1.8203	0.344832	FCRL1	Fc receptor like 1
8122182	0.3027	0.0039	-3.23668	-1.8216	-0.458074	SLC2A12///TBPL1	solute carrier family 2 member 12///TATA-box binding protein like 1
7973936	0.3027	0.0039	-3.23655	-1.8219	-0.462072	PSMA6	proteasome subunit alpha 6
8031981	0.3027	0.00391	3.23528	-1.8244	0.788665	WASH1///LOC100134445///WASH7P///WASH5P///WASH3P	WAS protein family homolog 1///uncharacterized LOC100134445///WAS protein family homolog 7 pseudogene///WAS protein family homolog 5 pseudogene///WAS protein family homolog 3 pseudogene
8041813	0.3027	0.00391	-3.23459	-1.8257	-0.526663	CRIPT	CXXC repeat containing interactor of PDZ3 domain
8116113	0.3027	0.00394	3.23132	-1.832	0.412918	FAM193B	family with sequence similarity 193 member B
8126474	0.3027	0.00396	-3.22968	-1.8352	-0.340263	PPP2R5D///MEA1	protein phosphatase 2 regulatory subunit B'delta///male-enhanced antigen 1
7987027	0.3027	0.004	3.2254	-1.8435	0.740926	GOLGA8O///GOLGA8N	golgin A8 family member O///golgin A8 family member N
7982587	0.3027	0.00401	-3.22414	-1.8459	-0.280687	C15orf53	chromosome 15 open reading frame 53
8013616	0.3027	0.00403	3.22216	-1.8498	0.475803	SLC46A1///SARM1	solute carrier family 46 member 1///sterile alpha and TIR motif containing 1
8087669	0.3027	0.00404	3.22086	-1.8523	0.251787	NPRL2	NPR2-like, GATOR1 complex subunit
8157463	0.3027	0.00406	3.21944	-1.8551	0.35824	TMEM268	transmembrane protein 268
8094139	0.3027	0.00407	3.21841	-1.8571	0.264045	DEFB131	defensin beta 131
8083233	0.3027	0.00407	3.2179	-1.858	0.81692	ZIC1	Zic family member 1
7933488	0.3027	0.0041	-3.21523	-1.8632	-0.420009	VSTM4	V-set and transmembrane domain containing 4
8108905	0.3027	0.00412	3.2129	-1.8677	0.353258	KCTD16	potassium channel tetramerization domain containing 16
8006325	0.3027	0.00414	-3.2102	-1.873	-0.462867	SUZ12	SUZ12 polycomb repressive complex 2 subunit
8128322	0.3027	0.00415	-3.21008	-1.8732	-0.401319	NDUFAF4	NADH:ubiquinone oxidoreductase complex assembly factor 4
7979516	0.3027	0.00415	-3.20932	-1.8747	-0.328263	TRMT5	tRNA methyltransferase 5
8078252	0.3027	0.00416	-3.2081	-1.877	-0.273908	UBE2E2	ubiquitin conjugating enzyme E2 E2
7990839	0.3027	0.00417	3.20723	-1.8787	0.611422	STARD5///IL16	StAR related lipid transfer domain containing 5///interleukin 16
8006668	0.3027	0.00418	3.20662	-1.8799	0.391772	MRM1	mitochondrial rRNA methyltransferase 1
7918936	0.3027	0.00418	-3.20625	-1.8806	-0.369518	VTCN1	V-set domain containing T cell activation inhibitor 1
8109732	0.3028	0.00422	-3.20251	-1.8878	-0.354392	MAT2B	methionine adenosyltransferase 2B
8092230	0.3028	0.00422	-3.20246	-1.8879	-0.584071	ZMAT3	zinc finger matrin-type 3
8063478	0.3028	0.00424	-3.20059	-1.8915	-0.341826	FAM210B	family with sequence similarity 210 member B
8171418	0.3035	0.00426	-3.19877	-1.8951	-0.47303	PIGA	phosphatidylinositol glycan anchor biosynthesis class A
7978586	0.3037	0.00427	-3.1975	-1.8975	-0.562467	CFL2	cofilin 2
8139421	0.3037	0.0043	-3.1941	-1.9041	-0.326102	H2AFV	H2A histone family member V
8014008	0.3037	0.00431	-3.19383	-1.9046	-0.489583	BLMH	bleomycin hydrolase
8165610	0.3037	0.00435	3.18974	-1.9125	0.360972	DPH7	diphthamide biosynthesis 7
8074522	0.3037	0.00436	3.18823	-1.9154	0.390603	ARVCF	armadillo repeat gene deleted in velocardiofacial syndrome
7966135	0.3037	0.00437	-3.18779	-1.9163	-0.393509	CORO1C	coronin 1C
8008339	0.3037	0.00437	3.18765	-1.9166	0.404715	RSAD1	radical S-adenosyl methionine domain containing 1
7956229	0.3037	0.00437	3.18727	-1.9173	0.387196	SLC39A5	solute carrier family 39 member 5
8109159	0.3037	0.0044	3.18439	-1.9229	0.953344	MIR145	microRNA 145
8130374	0.3037	0.00441	-3.18324	-1.9251	-0.357934	FBXO5	F-box protein 5
7989128	0.3037	0.00444	-3.18015	-1.9311	-0.410667	CNOT6L	CCR4-NOT transcription complex subunit 6 like
8128383	0.3037	0.00445	-3.18009	-1.9312	-0.331453	COQ3	coenzyme Q3, methyltransferase
8092095	0.3037	0.00445	-3.17945	-1.9324	-0.561765	TNIK	TRAF2 and NCK interacting kinase
8035249	0.3037	0.00446	3.17916	-1.933	0.37335	NR2F6	nuclear receptor subfamily 2 group F member 6
8159211	0.3037	0.00452	3.17304	-1.9448	0.445046	FCN2	ficolin 2
7941260	0.3037	0.00452	3.17296	-1.9449	0.305068	FRMD8	FERM domain containing 8
7927981	0.3037	0.00455	-3.16984	-1.951	-0.318079	SUPV3L1	Suv3 like RNA helicase
7923608	0.3037	0.00458	3.16773	-1.955	0.380245	REN	renin
7917754	0.3037	0.00458	3.1676	-1.9553	0.284714	BCAR3	breast cancer anti-estrogen resistance 3
7917741	0.3037	0.00459	-3.16628	-1.9578	-0.326926	TMED5	transmembrane p24 trafficking protein 5
8114193	0.3037	0.0046	-3.16578	-1.9588	-0.398468	SAR1B	secretion associated Ras related GTPase 1B
8089867	0.3037	0.0046	-3.16576	-1.9588	-0.541447	RABL3	RAB, member of RAS oncogene family like 3
7989493	0.3037	0.0046	-3.16513	-1.96	-0.48241	RPS27L	ribosomal protein S27 like
7956423	0.3037	0.00462	3.16391	-1.9624	0.38491	INHBC	inhibin beta C subunit
8002992	0.3037	0.00462	3.16372	-1.9628	0.338622	C16orf46	chromosome 16 open reading frame 46
8021169	0.3043	0.00465	3.16069	-1.9686	0.521759	LIPG	lipase G, endothelial type
8084955	0.3043	0.00465	-3.16063	-1.9687	-0.330626	PIGX	phosphatidylinositol glycan anchor biosynthesis class X
7964300	0.3045	0.00469	3.15753	-1.9747	0.39295	ZBTB39	zinc finger and BTB domain containing 39
8097521	0.3045	0.0047	-3.1563	-1.9771	-0.411037	SCOC	short coiled-coil protein
7949060	0.3045	0.00471	3.15545	-1.9787	0.309146	PPP1R14B///LIMK2	protein phosphatase 1 regulatory inhibitor subunit 14B///LIM domain kinase 2
8038993	0.3045	0.00471	-3.15486	-1.9798	-0.531332	ZNF28	zinc finger protein 28
8023871	0.3045	0.00473	-3.15311	-1.9832	-0.284536	ZADH2	zinc binding alcohol dehydrogenase domain containing 2
8151413	0.3045	0.00475	-3.15201	-1.9853	-0.320837	TCEB1	tripartite motif containing 74///tripartite motif containing 73
7982271	0.3048	0.00476	3.15072	-1.9878	0.771481	GOLGA8O///GOLGA8T///GOLGA8IP	golgin A8 family member O///golgin A8 family member T///golgin A8 family member I, pseudogene
8153430	0.3053	0.00481	3.14616	-1.9966	0.41286	NAPRT	nicotinate phosphoribosyltransferase
8011542	0.3053	0.00481	3.14589	-1.9971	0.286682	ZZEF1	zinc finger ZZ-type and EF-hand domain containing 1
8039144	0.3053	0.00484	-3.14391	-2.0009	-0.978618	TMC4	transmembrane channel like 4
7922174	0.3053	0.00484	-3.14385	-2.001	-0.313792	F5	coagulation factor V
7935730	0.3053	0.00484	-3.14339	-2.0019	-0.302366	CWF19L1	CWF19-like 1, cell cycle control (S. pombe)
8108066	0.3053	0.00487	-3.14069	-2.0071	-0.315827	UBE2B	ubiquitin conjugating enzyme E2 B
8119915	0.3053	0.00491	3.13744	-2.0134	0.399351	LINC01512	long intergenic non-protein coding RNA 1512
8151952	0.3053	0.00491	-3.13744	-2.0134	-0.587228	NIPAL2	NIPA like domain containing 2
8128716	0.3053	0.00491	-3.13713	-2.014	-0.406712	CD164	CD164 molecule
7995829	0.3053	0.00492	3.13627	-2.0156	1.43449	MT1H	metallothionein 1H
8007643	0.3053	0.00495	3.134	-2.02	0.218281	MEIOC	meiosis specific with coiled-coil domain
8056583	0.3053	0.00497	-3.13226	-2.0233	-0.580134	ABCB11	ATP binding cassette subfamily B member 11
8050227	0.3053	0.00497	3.13195	-2.0239	1.18482	LOC400943	uncharacterized LOC400943
8077663	0.3053	0.00499	-3.13048	-2.0268	-0.258832	JAGN1	jagunal homolog 1
8149142	0.3053	0.00499	3.13022	-2.0273	0.314376	DEFA5	defensin alpha 5
8137280	0.3053	0.00501	3.1286	-2.0304	0.333222	NOS3	nitric oxide synthase 3
7917482	0.3053	0.00502	-3.12797	-2.0316	-0.427376	RBMXL1///KYAT3	RNA binding motif protein, X-linked like 1///kynurenine aminotransferase 3
8175288	0.3053	0.00503	-3.12708	-2.0333	-0.57904	MOSPD1	motile sperm domain containing 1
8105104	0.3053	0.00504	-3.12628	-2.0348	-0.483953	C5orf51	chromosome 5 open reading frame 51
7920944	0.3053	0.00505	3.1253	-2.0367	0.52405	SMG5	SMG5, nonsense mediated mRNA decay factor
8059249	0.3053	0.00507	3.12345	-2.0403	0.369672	OBSL1	obscurin like 1
8168416	0.3053	0.00508	-3.1227	-2.0417	-0.394534	USMG5	up-regulated during skeletal muscle growth 5 homolog (mouse)
8078729	0.3054	0.00509	3.12186	-2.0433	0.337023	MYD88	myeloid differentiation primary response 88
8083301	0.3069	0.00512	-3.11894	-2.0489	-0.345183	TM4SF4	transmembrane 4 L six family member 4
8017675	0.3076	0.00515	3.11711	-2.0525	0.370255	PLEKHM1P1///PLEKHM1	pleckstrin homology and RUN domain containing M1 pseudogene 1///pleckstrin homology and RUN domain containing M1
8092265	0.3079	0.00516	-3.11593	-2.0547	-0.37712	MRPL47	mitochondrial ribosomal protein L47
8020037	0.308	0.00517	3.11502	-2.0565	0.275021	MTCL1	microtubule crosslinking factor 1
7993185	0.3083	0.00519	-3.11379	-2.0588	-0.36969	NUBP1	nucleotide binding protein 1
8072894	0.3083	0.00519	3.11311	-2.0601	0.355166	TRIOBP	TRIO and F-actin binding protein
8031483	0.3085	0.00521	-3.11179	-2.0627	-0.369348	RPL28	ribosomal protein L28
8112337	0.3085	0.00522	-3.11132	-2.0636	-0.488099	SREK1IP1	SREK1 interacting protein 1
8020468	0.3086	0.00523	-3.11036	-2.0654	-0.60403	RBBP8	RB binding protein 8, endonuclease
8093476	0.3088	0.00525	3.10854	-2.0689	0.36328	UVSSA	UV stimulated scaffold protein A
7989013	0.3108	0.00531	-3.10357	-2.0784	-0.597769	RSL24D1	ribosomal L24 domain containing 1
8149551	0.3108	0.00536	-3.09938	-2.0865	-0.614581	PSD3	pleckstrin and Sec7 domain containing 3
7998604	0.3108	0.00537	3.09905	-2.0871	0.325158	HAGH	hydroxyacylglutathione hydrolase
8141066	0.3108	0.00537	-3.09885	-2.0875	-0.357188	PON3	paraoxonase 3
8115368	0.3108	0.00538	3.09779	-2.0895	0.256061	NMUR2	neuromedin U receptor 2
7909422	0.3108	0.0054	3.09663	-2.0918	0.263902	MIR205HG///MIR205	MIR205 host gene///microRNA 205
8080344	0.3108	0.00541	3.09534	-2.0942	0.552083	STAB1	stabilin 1
8100893	0.3108	0.00541	-3.0953	-2.0943	-0.397503	COX18	COX18, cytochrome c oxidase assembly factor
8135625	0.3108	0.00542	-3.09459	-2.0957	-0.429589	CAPZA2	capping actin protein of muscle Z-line alpha subunit 2
7921298	0.3108	0.00542	3.09442	-2.096	0.28383	FCRL2	Fc receptor like 2
8133114	0.3112	0.00544	-3.0931	-2.0985	-0.278387	VKORC1L1	vitamin K epoxide reductase complex subunit 1 like 1
8009301	0.312	0.00546	3.09129	-2.102	0.299879	PRKCA	protein kinase C alpha
8028563	0.3145	0.00553	-3.08565	-2.1128	-0.310101	SARS2///MRPS12	seryl-tRNA synthetase 2, mitochondrial///mitochondrial ribosomal protein S12
8001496	0.3145	0.00556	-3.08388	-2.1162	-0.388877	NUDT21	nudix hydrolase 21
7961702	0.3145	0.00558	-3.08187	-2.12	-0.51226	KCNJ8	potassium voltage-gated channel subfamily J member 8
7918008	0.3145	0.00559	-3.08151	-2.1207	-0.381235	DBT	dihydrolipoamide branched chain transacylase E2
8120431	0.3145	0.0056	-3.08086	-2.122	-0.414344	PTP4A1	protein tyrosine phosphatase type IVA, member 1
8118367	0.3145	0.0056	3.08056	-2.1225	0.280606	SKIV2L	uncharacterized LOC102724238///glioblastoma down-regulated RNA
8057599	0.3147	0.00562	-3.07879	-2.1259	-0.487517	TFPI	tissue factor pathway inhibitor
7901883	0.3149	0.00564	-3.07779	-2.1278	-0.461976	ANGPTL3	angiopoietin like 3
7980990	0.3152	0.00566	-3.07614	-2.131	-0.478855	GON7///UBR7	GON7, KEOPS complex subunit homolog///ubiquitin protein ligase E3 component n-recognin 7 (putative)
8001876	0.3152	0.00567	-3.07515	-2.1329	-0.411674	NAE1	NEDD8 activating enzyme E1 subunit 1
8151436	0.3152	0.0057	-3.07263	-2.1377	-0.374	PEX2	peroxisomal biogenesis factor 2
7965686	0.3152	0.00571	3.07242	-2.1381	0.465858	ANKS1B	ankyrin repeat and sterile alpha motif domain containing 1B
8091546	0.3156	0.00572	-3.07105	-2.1407	-0.427001	TMEM14EP	transmembrane protein 14E, pseudogene
7987114	0.316	0.00575	3.06919	-2.1443	0.55725	ULK4P2///GOLGA8T///GOLGA8J///GOLGA8IP///ULK4P1///ULK4P3	ULK4 pseudogene 2///golgin A8 family member T///golgin A8 family member J///golgin A8 family member I, pseudogene///ULK4 pseudogene 1///ULK4 pseudogene 3
8086201	0.3171	0.00578	3.06686	-2.1487	0.32511	ACAA1	acetyl-CoA acyltransferase 1
7907690	0.3175	0.0058	3.06562	-2.1511	0.607227	TOR3A	torsin family 3 member A
7910680	0.3195	0.00586	-3.06099	-2.16	-0.589098	GPR137B	G protein-coupled receptor 137B
8084947	0.3195	0.00586	-3.06074	-2.1604	-0.382376	FBXO45	F-box protein 45
7920077	0.3207	0.00589	3.05843	-2.1649	0.466009	LINGO4///RORC	leucine rich repeat and Ig domain containing 4///RAR related orphan receptor C
8152255	0.3207	0.0059	-3.05768	-2.1663	-0.396851	SLC25A32///DCAF13	solute carrier family 25 member 32///DDB1 and CUL4 associated factor 13
7988077	0.3209	0.00592	-3.05648	-2.1686	-0.351826	LCMT2	leucine carboxyl methyltransferase 2
7957715	0.3209	0.00594	-3.05513	-2.1712	-0.392135	NEDD1	neural precursor cell expressed, developmentally down-regulated 1
7994269	0.3211	0.006	3.05083	-2.1793	0.388554	KDM8	heat shock transcription factor, Y-linked 2///heat shock transcription factor, Y-linked 1
7955551	0.3216	0.00603	3.04824	-2.1843	0.285967	ANKRD33	ankyrin repeat domain 33
8049487	0.3216	0.00604	3.04806	-2.1846	0.353593	MLPH	melanophilin
7933723	0.3226	0.00607	-3.04604	-2.1885	-0.352771	IPMK	inositol polyphosphate multikinase
7902634	0.3229	0.00609	-3.04426	-2.1919	-0.411877	RPF1	ribosome production factor 1 homolog
8131539	0.324	0.00612	-3.04214	-2.1959	-0.502155	TMEM106B	transmembrane protein 106B
8107934	0.3251	0.00615	3.0399	-2.2002	0.472051	C5orf56	chromosome 5 open reading frame 56
8047228	0.326	0.00619	-3.03733	-2.2051	-0.652515	MOB4	MOB family member 4, phocein
7900710	0.3269	0.00628	3.03104	-2.2171	0.321853	SZT2	seizure threshold 2 homolog (mouse)
8177635	0.3269	0.00629	-3.03033	-2.2184	-0.380985	AK6///TAF9	ribosomal protein L9
8083415	0.3269	0.0063	-3.02968	-2.2197	-0.475801	AADAC	arylacetamide deacetylase
8015665	0.3269	0.00631	3.02882	-2.2213	0.420662	PLEKHH3	pleckstrin homology, MyTH4 and FERM domain containing H3
7896882	0.3269	0.00633	3.02752	-2.2238	0.388338	SCNN1D	sodium channel epithelial 1 delta subunit
8025968	0.3269	0.00634	-3.02674	-2.2253	-0.376441	ZNF69	zinc finger protein 69
7900228	0.3269	0.00636	-3.02514	-2.2283	-0.391446	NDUFS5///SNORA70///RPL10///DNASE1L1	NADH:ubiquinone oxidoreductase subunit S5///small nucleolar RNA, H/ACA box 70///ribosomal protein L10///deoxyribonuclease 1 like 1
8119874	0.3269	0.00638	-3.02398	-2.2305	-0.318308	MAD2L1BP	MAD2L1 binding protein
8172022	0.3269	0.00639	-3.02339	-2.2316	-0.387687	TMEM47	transmembrane protein 47
8069822	0.3269	0.00641	3.02204	-2.2342	0.239221	KRTAP19-1	keratin associated protein 19-1
7971541	0.3269	0.00642	-3.02154	-2.2352	-0.516988	SUCLA2	succinate-CoA ligase ADP-forming beta subunit
7961097	0.3269	0.00642	3.02135	-2.2355	0.353252	LOC400002	uncharacterized LOC400002
8167912	0.3269	0.00646	3.01887	-2.2403	0.357874	KLF8	Kruppel like factor 8
8060103	0.3269	0.0065	3.01627	-2.2452	0.319295	ANKMY1	ankyrin repeat and MYND domain containing 1
8173629	0.3269	0.0065	-3.01611	-2.2455	-0.345681	ABCB7	ATP binding cassette subfamily B member 7
8084963	0.3269	0.0065	-3.01576	-2.2462	-0.506697	PAK2	p21 (RAC1) activated kinase 2
7942613	0.3269	0.00651	3.01556	-2.2465	0.636042	DGAT2	diacylglycerol O-acyltransferase 2
8126486	0.3269	0.00652	3.01489	-2.2478	0.297535	CUL7	cullin 7
7942932	0.3269	0.00652	-3.01447	-2.2486	-0.408065	HIKESHI	Hikeshi, heat shock protein nuclear import factor
8092073	0.3269	0.00652	-3.01441	-2.2487	-0.395193	EIF5A2	eukaryotic translation initiation factor 5A2
8145440	0.3269	0.00654	-3.01359	-2.2503	-0.358472	PPP2R2A	protein phosphatase 2 regulatory subunit Balpha
8114829	0.3269	0.00654	-3.01326	-2.2509	-0.378201	YIPF5	Yip1 domain family member 5
7981974	0.3269	0.00655	-3.01257	-2.2522	-0.764498	SNORD116-13	small nucleolar RNA, C/D box 116-13
8166511	0.3269	0.00656	-3.01205	-2.2532	-0.39621	PDK3	pyruvate dehydrogenase kinase 3
7900962	0.3271	0.00659	3.00967	-2.2577	0.272558	DMAP1	DNA methyltransferase 1 associated protein 1
8135235	0.3271	0.00663	-3.00724	-2.2624	-0.352138	PMPCB	peptidase, mitochondrial processing beta subunit
8154670	0.3271	0.00663	-3.00705	-2.2627	-0.519829	IFT74	intraflagellar transport 74
8115168	0.3271	0.00664	-3.00677	-2.2633	-0.265498	RBM22	RNA binding motif protein 22
7908496	0.3271	0.00664	-3.00655	-2.2637	-0.33756	CFHR2	complement factor H related 2
8002283	0.3271	0.00665	-3.00595	-2.2648	-0.70167	TMED6	transmembrane p24 trafficking protein 6
7941709	0.3274	0.00667	3.0049	-2.2668	0.265414	RBM4	RNA binding motif protein 4
7990027	0.3275	0.00669	3.00344	-2.2696	0.74483	ANP32A-IT1	ANP32A intronic transcript 1
8121794	0.3275	0.00673	-3.00089	-2.2744	-0.471124	SMPDL3A	sphingomyelin phosphodiesterase acid like 3A
7982230	0.3275	0.00674	3.00028	-2.2756	0.469606	ULK4P2///GOLGA8T///GOLGA8IP///ULK4P1///ULK4P3	ULK4 pseudogene 2///golgin A8 family member T///golgin A8 family member I, pseudogene///ULK4 pseudogene 1///ULK4 pseudogene 3
8072946	0.3275	0.00677	-2.99819	-2.2795	-0.306202	EIF3L	eukaryotic translation initiation factor 3 subunit L
7989315	0.3275	0.00678	-2.99759	-2.2807	-0.51936	GTF2A2	general transcription factor IIA subunit 2
7901696	0.3275	0.00679	2.99678	-2.2822	0.421024	PCSK9	proprotein convertase subtilisin/kexin type 9
7997281	0.3275	0.00681	-2.9959	-2.2839	-0.259106	LOC100288358///TERF2IP	uncharacterized LOC100288358///TERF2 interacting protein
7927231	0.3275	0.00681	2.9959	-2.2839	0.552814	AGAP9///AGAP12P///AGAP4	ArfGAP with GTPase domain, ankyrin repeat and PH domain 9///ArfGAP with GTPase domain, ankyrin repeat and PH domain 12, pseudogene///ArfGAP with GTPase domain, ankyrin repeat and PH domain 4
8047217	0.3275	0.00681	-2.99563	-2.2844	-0.47826	COQ10B	coenzyme Q10B
8109475	0.3275	0.00682	-2.99482	-2.2859	-0.385074	MRPL22	mitochondrial ribosomal protein L22
8173941	0.3275	0.00683	-2.99449	-2.2866	-0.277245	TSPAN6	tetraspanin 6
8081667	0.3275	0.00683	-2.9942	-2.2871	-0.345115	SLC35A5	solute carrier family 35 member A5
8011018	0.3275	0.00685	-2.99321	-2.289	-0.247036	CRK	CRK proto-oncogene, adaptor protein
8122348	0.3275	0.00685	-2.99299	-2.2894	-0.337539	VTA1	vesicle trafficking 1
7984289	0.3275	0.00687	-2.99174	-2.2918	-0.31449	RAB11A	RAB11A, member RAS oncogene family
8172358	0.3275	0.00688	-2.99144	-2.2923	-0.448252	UXT	ubiquitously expressed prefoldin like chaperone
7907160	0.3275	0.00689	-2.99069	-2.2938	-0.389772	ATP1B1	ATPase Na+/K+ transporting subunit beta 1
7959361	0.3275	0.00689	2.99038	-2.2944	0.42312	MLXIP	MLX interacting protein
7946439	0.3277	0.00692	-2.98882	-2.2973	-0.390963	TMEM9B	TMEM9 domain family member B
8067955	0.3278	0.00693	-2.98803	-2.2988	-0.414604	CXADR	coxsackie virus and adenovirus receptor
8046048	0.3279	0.00695	2.98671	-2.3013	0.424734	CSRNP3	cysteine and serine rich nuclear protein 3
8019930	0.3279	0.00695	-2.98682	-2.3011	-0.398068	MYL12B	ribosomal protein L9
8112865	0.3289	0.00699	2.98406	-2.3063	0.476044	SERINC5	serine incorporator 5
7938309	0.3298	0.00702	-2.98229	-2.3097	-0.282644	KRT8P41	keratin 8 pseudogene 41
7971967	0.3302	0.00704	-2.98108	-2.312	-0.319204	BORA///DIS3	bora, aurora kinase A activator///DIS3 homolog, exosome endoribonuclease and 3'-5' exoribonuclease
8075828	0.3306	0.00706	2.97994	-2.3141	0.291345	IFT27	intraflagellar transport 27
7975626	0.331	0.00709	-2.97799	-2.3178	-0.374368	ELMSAN1	ELM2 and Myb/SANT domain containing 1
8126629	0.3337	0.00717	2.97301	-2.3273	0.379523	GTPBP2	GTP binding protein 2
7936817	0.3337	0.00718	-2.97244	-2.3283	-0.332037	C10orf88	chromosome 10 open reading frame 88
8077042	0.3337	0.00718	2.97232	-2.3286	0.411649	SBF1	SET binding factor 1
8151993	0.3342	0.00721	-2.97105	-2.331	-0.378282	COX6C	cytochrome c oxidase subunit 6C
8119898	0.3344	0.00722	2.97012	-2.3327	0.437005	VEGFA	vascular endothelial growth factor A
7918813	0.3349	0.00729	-2.96624	-2.3401	-0.319564	CSDE1///NRAS	cold shock domain containing E1///neuroblastoma RAS viral oncogene homolog
7972062	0.3349	0.00729	-2.96612	-2.3403	-0.425918	FBXL3	F-box and leucine rich repeat protein 3
7976571	0.3349	0.00729	-2.96579	-2.3409	-0.454435	GSKIP	GSK3B interacting protein
7998700	0.3349	0.0073	2.96525	-2.3419	0.34689	PKD1	polycystin 1, transient receptor potential channel interacting
8119782	0.3351	0.00733	2.96384	-2.3446	0.664653	SLC22A7	solute carrier family 22 member 7
7975851	0.336	0.00737	-2.96147	-2.3491	-0.3103	IFT43	intraflagellar transport 43
7998434	0.336	0.00737	2.96137	-2.3493	0.65454	TPSB2///TPSAB1	mitogen-activated protein kinase 8 interacting protein 1 pseudogene///mitogen-activated protein kinase 8 interacting protein 1
8122317	0.3365	0.00741	-2.95895	-2.3539	-0.308855	HEBP2	heme binding protein 2
8180267	0.3365	0.00742	2.95853	-2.3546	0.472029	EPPK1	epiplakin 1
7969341	0.337	0.00744	-2.95708	-2.3574	-0.351144	TDRD3	tudor domain containing 3
8052979	0.3379	0.00747	2.95507	-2.3612	0.387988	SFXN5	sideroflexin 5
8163637	0.3385	0.0075	-2.95345	-2.3642	-0.779349	TNC	tenascin C
8006321	0.3395	0.00754	2.95103	-2.3688	0.436382	MIR193A	microRNA 193a
8135392	0.3395	0.00756	-2.95034	-2.3701	-0.380113	HBP1	HMG-box transcription factor 1
8008870	0.3399	0.00759	-2.9486	-2.3734	-0.407843	VMP1	vacuole membrane protein 1
8166769	0.34	0.0076	-2.9478	-2.3749	-0.455098	OTC	ornithine carbamoyltransferase
8152133	0.34	0.00762	-2.94675	-2.3769	-0.442424	RRM2B	ribonucleotide reductase regulatory TP53 inducible subunit M2B
8116348	0.34	0.00762	2.94664	-2.3771	0.298517	TBC1D9B	TBC1 domain family member 9B
8116859	0.34	0.00763	-2.94613	-2.3781	-0.374291	TMEM14C	transmembrane protein 14C
7999596	0.3412	0.00766	2.94408	-2.3819	0.520535	LOC728138///KIAA2013	KIAA2013 pseudogene///KIAA2013
8142912	0.3419	0.00769	-2.94256	-2.3848	-0.395325	TMEM209	transmembrane protein 209
8159732	0.342	0.00771	2.94174	-2.3863	0.643318	EHMT1-IT1	EHMT1 intronic transcript 1
7900167	0.342	0.00773	-2.94018	-2.3893	-0.281276	CDCA8	cell division cycle associated 8
7955425	0.342	0.00776	-2.93855	-2.3924	-0.292543	ATF1	activating transcription factor 1
8066612	0.342	0.00776	2.9384	-2.3926	0.436398	NEURL2///CTSA	neuralized E3 ubiquitin protein ligase 2///cathepsin A
8134091	0.342	0.00777	-2.9383	-2.3928	-0.325986	CLDN12	claudin 12
7935707	0.342	0.00777	-2.93811	-2.3932	-0.351629	CHUK	conserved helix-loop-helix ubiquitous kinase
8111788	0.342	0.00779	-2.93711	-2.3951	-0.410825	TTC33	tetratricopeptide repeat domain 33
7946641	0.342	0.00782	2.93546	-2.3982	0.466348	GALNT18	polypeptide N-acetylgalactosaminyltransferase 18
8053949	0.342	0.00782	2.9352	-2.3987	0.241215	KANSL3	KAT8 regulatory NSL complex subunit 3
7964033	0.342	0.00784	2.93442	-2.4001	0.353649	ANKRD52	ankyrin repeat domain 52
8082229	0.342	0.00784	-2.93434	-2.4003	-0.383504	UMPS	uridine monophosphate synthetase
8146564	0.342	0.00786	-2.93322	-2.4024	-0.370774	RAB2A	RAB2A, member RAS oncogene family
7933574	0.3425	0.00788	2.93203	-2.4046	0.661319	AGAP5///AGAP12P///AGAP6///AGAP4	potassium calcium-activated channel subfamily M regulatory beta subunit 3
8147543	0.3426	0.00789	-2.93118	-2.4062	-0.355907	ERICH5	glutamate rich 5
8034482	0.3429	0.00792	2.9295	-2.4094	0.329272	TNPO2	transportin 2
7963631	0.3429	0.00793	2.92913	-2.4101	0.281987	RARG	retinoic acid receptor gamma
7941639	0.3435	0.00796	-2.92742	-2.4133	-0.259882	DPP3///BBS1	dipeptidyl peptidase 3///Bardet-Biedl syndrome 1
8067295	0.3435	0.00797	-2.92681	-2.4145	-0.434885	PRELID3B	PRELI domain containing 3B
7972810	0.3435	0.00799	-2.92586	-2.4163	-0.404259	CARS2	cysteinyl-tRNA synthetase 2, mitochondrial (putative)
7955361	0.3435	0.00801	-2.92461	-2.4186	-0.322515	LARP4	La ribonucleoprotein domain family member 4
8127425	0.3435	0.00803	-2.92364	-2.4204	-0.334003	LMBRD1	LMBR1 domain containing 1
8040960	0.3435	0.00804	2.92325	-2.4212	0.578758	GCKR	glucokinase (hexokinase 4) regulator
7920100	0.3435	0.00804	2.92314	-2.4214	0.218363	THEM5	thioesterase superfamily member 5
7938269	0.3435	0.00808	-2.92103	-2.4254	-0.300341	TUB	tubby bipartite transcription factor
7969979	0.3435	0.00809	-2.92045	-2.4264	-0.332673	ABHD13	abhydrolase domain containing 13
8079517	0.3435	0.00809	2.92023	-2.4269	0.285827	KLHL18	kelch like family member 18
8111234	0.3435	0.0081	2.91983	-2.4276	0.318823	CDH12	cadherin 12
7914354	0.3435	0.00812	-2.91885	-2.4295	-0.291854	PEF1	penta-EF-hand domain containing 1
8149749	0.3435	0.00814	-2.91789	-2.4313	-0.395569	TNFRSF10D	TNF receptor superfamily member 10d
7971723	0.3435	0.00815	2.91716	-2.4326	0.307573	LINC00282	long intergenic non-protein coding RNA 282
8074020	0.3436	0.00819	2.91503	-2.4366	0.380469	SELO	selenoprotein O
7912839	0.3436	0.00819	2.91475	-2.4372	0.576416	CROCCP2	ciliary rootlet coiled-coil, rootletin pseudogene 2
8107859	0.3436	0.00821	-2.91372	-2.4391	-0.342516	LYRM7	LYR motif containing 7
7905581	0.3441	0.00824	2.91249	-2.4414	0.31857	S100A1	S100 calcium binding protein A1
8156295	0.3442	0.00826	-2.91123	-2.4438	-0.245817	SECISBP2	SECIS binding protein 2
8072113	0.3443	0.00829	-2.90969	-2.4467	-0.360469	SRRD	SRR1 domain containing
8165642	0.3443	0.00829	-2.90948	-2.4471	-0.379299	TMEM203	transmembrane protein 203
7926836	0.3443	0.00831	-2.90838	-2.4491	-0.6625	RAB18	RAB18, member RAS oncogene family
7926531	0.3443	0.00833	-2.90778	-2.4503	-0.615888	ARL5B	ADP ribosylation factor like GTPase 5B
7933186	0.3443	0.00834	-2.90716	-2.4514	-0.334236	ZNF32	zinc finger protein 32
7968411	0.3443	0.00834	2.90704	-2.4517	0.393149	EEF1DP3	eukaryotic translation elongation factor 1 delta pseudogene 3
7982256	0.3444	0.00836	2.90598	-2.4537	0.702225	GOLGA8O///GOLGA8N///GOLGA8IP	REX1, RNA exonuclease 1 homolog-like 1, pseudogene
8151871	0.3445	0.00838	-2.90488	-2.4557	-0.537414	CCNE2	cyclin E2
8075493	0.3445	0.00841	2.90344	-2.4584	0.282547	PATZ1	POZ/BTB and AT hook containing zinc finger 1
8091432	0.3446	0.00845	-2.90134	-2.4624	-0.415661	COMMD2	COMM domain containing 2
7957052	0.3446	0.00848	-2.89962	-2.4656	-0.290103	CCT2	chaperonin containing TCP1 subunit 2
7902074	0.3446	0.00849	-2.89896	-2.4668	-0.751019	LEPROT///LEPR	leptin receptor overlapping transcript///leptin receptor
8090364	0.3446	0.0085	2.89848	-2.4677	0.700767	ZXDC	ST6 N-acetylgalactosaminide alpha-2,6-sialyltransferase 1
7962013	0.3446	0.00851	-2.89797	-2.4687	-0.53072	ERGIC2	ERGIC and golgi 2
7932243	0.3446	0.00852	-2.89779	-2.469	-0.568637	FAM171A1	family with sequence similarity 171 member A1
8020241	0.3446	0.00853	-2.89719	-2.4701	-0.330162	PSMG2	proteasome assembly chaperone 2
8024467	0.345	0.00859	2.89428	-2.4756	0.692664	TMPRSS9///TIMM13///TMPRSS9	transmembrane protease, serine 9///translocase of inner mitochondrial membrane 13///transmembrane protease, serine 9
7985767	0.345	0.00859	-2.8939	-2.4763	-0.4073	AEN	apoptosis enhancing nuclease
8073522	0.345	0.0086	2.89367	-2.4767	0.468769	SREBF2	sterol regulatory element binding transcription factor 2
8032829	0.345	0.0086	2.89341	-2.4772	0.568106	PLIN4	perilipin 4
7974418	0.345	0.00864	-2.89167	-2.4805	-0.30904	CGRRF1	cell growth regulator with ring finger domain 1
7903867	0.345	0.00865	2.89093	-2.4819	0.294327	KCNC4	potassium voltage-gated channel subfamily C member 4
8115562	0.345	0.00868	-2.88934	-2.4849	-0.296906	RNF145	ring finger protein 145
7956989	0.345	0.00869	-2.88918	-2.4852	-0.433492	MDM2	MDM2 proto-oncogene
8002082	0.345	0.0087	2.88843	-2.4866	0.376718	GFOD2	glucose-fructose oxidoreductase domain containing 2
8065256	0.345	0.00872	-2.8873	-2.4887	-0.317283	CRNKL1	crooked neck pre-mRNA splicing factor 1
8132929	0.345	0.00873	-2.88685	-2.4895	-0.340476	GBAS	glioblastoma amplified sequence
7923792	0.345	0.00876	2.88541	-2.4922	0.577131	SLC45A3	solute carrier family 45 member 3
7995739	0.345	0.00879	2.88372	-2.4954	0.514303	GNAO1	G protein subunit alpha o1
8094251	0.345	0.00879	2.88371	-2.4954	0.58365	TAPT1-AS1	TAPT1 antisense RNA 1 (head to head)
7992474	0.345	0.00881	2.88273	-2.4973	0.31748	TSC2	tuberous sclerosis 2
7983021	0.345	0.00885	2.88107	-2.5004	0.457552	PLA2G4B///JMJD7///JMJD7-PLA2G4B	phospholipase A2 group IVB///jumonji domain containing 7///JMJD7-PLA2G4B readthrough
8076909	0.345	0.00885	2.88085	-2.5008	0.405861	TUBGCP6	tubulin gamma complex associated protein 6
8096733	0.345	0.00885	-2.88074	-2.501	-0.412917	SGMS2	sphingomyelin synthase 2
8077815	0.345	0.00886	2.88063	-2.5012	0.631054	LINC00852	long intergenic non-protein coding RNA 852
8005733	0.345	0.00887	2.88017	-2.502	0.25425	NCOR1P1///NCOR1	nuclear receptor corepressor 1 pseudogene 1///nuclear receptor corepressor 1
8114158	0.345	0.00888	-2.87966	-2.503	-0.356752	PPP2CA	protein phosphatase 2 catalytic subunit alpha
8119423	0.3451	0.0089	2.87853	-2.5051	0.887025	ADCY10P1	adenylate cyclase 10, soluble pseudogene 1
8109697	0.3451	0.0089	-2.87833	-2.5055	-0.429518	CCNG1	cyclin G1
7916229	0.3452	0.00893	2.87717	-2.5076	0.553452	ECHDC2	enoyl-CoA hydratase domain containing 2
7969544	0.3453	0.00894	-2.87652	-2.5089	-0.38076	NDFIP2	Nedd4 family interacting protein 2
8171834	0.3458	0.00896	-2.87529	-2.5112	-0.419484	RPL9	zinc finger SWIM-type containing 8
7968670	0.3458	0.00897	-2.87489	-2.5119	-0.404897	UFM1	ubiquitin fold modifier 1
8025958	0.3476	0.00905	-2.87107	-2.5191	-0.318176	ZNF440	zinc finger protein 440
8109403	0.3477	0.00912	-2.86783	-2.5251	-0.42054	MFAP3	microfibrillar associated protein 3
8153609	0.3477	0.00912	2.86781	-2.5252	0.404441	PARP10	poly(ADP-ribose) polymerase family member 10
7999387	0.3477	0.00914	-2.86685	-2.5269	-0.364534	EMP2	epithelial membrane protein 2
7937474	0.3477	0.00915	2.86615	-2.5283	0.879639	LOC171391	uncharacterized LOC171391
7979725	0.3477	0.00916	-2.8656	-2.5293	-0.483243	PLEKHH1///PIGH	pleckstrin homology, MyTH4 and FERM domain containing H1///phosphatidylinositol glycan anchor biosynthesis class H
8059852	0.3477	0.00917	-2.86531	-2.5298	-0.586276	MSL3P1	male-specific lethal 3 homolog (Drosophila) pseudogene 1
8144643	0.3477	0.00919	2.86413	-2.532	0.361577	GATA4	GATA binding protein 4
8101699	0.3477	0.0092	-2.86401	-2.5323	-0.727062	PPM1K	protein phosphatase, Mg2+/Mn2+ dependent 1K
7948588	0.3477	0.0092	2.86392	-2.5324	0.633097	SYT7	synaptotagmin 7
8073334	0.3477	0.00921	-2.86324	-2.5337	-0.282748	RBX1	ring-box 1
7932227	0.3477	0.00922	-2.86311	-2.5339	-0.387138	NMT2	N-myristoyltransferase 2
8078962	0.3477	0.00923	-2.8625	-2.5351	-0.268561	EIF1B	eukaryotic translation initiation factor 1B
8110169	0.3477	0.00924	-2.86185	-2.5363	-0.260301	FAF2	Fas associated factor family member 2
8165773	0.3477	0.00929	2.85976	-2.5402	0.4185	AKAP17A///ASMT	A-kinase anchoring protein 17A///acetylserotonin O-methyltransferase
7973004	0.3477	0.00929	2.85936	-2.5409	0.329257	OR4Q3	olfactory receptor family 4 subfamily Q member 3
8047467	0.3477	0.00932	2.85814	-2.5432	0.284265	CDK15	cyclin dependent kinase 15
7928661	0.3477	0.00933	2.85776	-2.5439	0.640572	BMS1P21///MBL1P	BMS1, ribosome biogenesis factor pseudogene 21///mannose binding lectin 1, pseudogene
7921492	0.3477	0.00934	2.85706	-2.5452	0.806197	IGSF9	immunoglobulin superfamily member 9
8072488	0.3477	0.00936	-2.85631	-2.5466	-0.318882	DRG1	developmentally regulated GTP binding protein 1
8036938	0.3477	0.00936	2.8563	-2.5466	0.292395	COQ8B	coenzyme Q8B
7981481	0.3477	0.00937	-2.85576	-2.5477	-0.30785	C14orf2	chromosome 14 open reading frame 2
7989657	0.3477	0.00939	2.85497	-2.5491	0.382423	KIAA0101	KIAA0101
8078214	0.3477	0.00941	-2.85409	-2.5508	-0.357206	RAB5A	RAB5A, member RAS oncogene family
8103399	0.3486	0.00945	-2.85224	-2.5542	-0.395934	PDGFC	platelet derived growth factor C
7943297	0.3486	0.00951	-2.84912	-2.56	-0.501471	CEP57	centrosomal protein 57
7942693	0.3486	0.00951	2.84906	-2.5602	0.316742	B3GNT6	UDP-GlcNAc:betaGal beta-1,3-N-acetylglucosaminyltransferase 6
8074541	0.3486	0.00953	2.8483	-2.5616	0.351439	TRMT2A	tRNA methyltransferase 2 homolog A
8138997	0.3486	0.00956	-2.84703	-2.5639	-0.370673	TBX20	T-box 20
8104422	0.3486	0.00956	-2.84698	-2.564	-0.2572	MTRR	5-methyltetrahydrofolate-homocysteine methyltransferase reductase
8079896	0.3486	0.00959	2.84545	-2.5669	0.313753	SEMA3F	semaphorin 3F
8136080	0.3486	0.00961	2.84464	-2.5684	0.436353	SMO	smoothened, frizzled class receptor
8139746	0.3486	0.00961	2.8446	-2.5685	0.247007	PHKG1	phosphorylase kinase catalytic subunit gamma 1
7966878	0.3486	0.00963	-2.84352	-2.5705	-0.4209	CIT	citron rho-interacting serine/threonine kinase
7986530	0.3486	0.00965	2.84276	-2.5719	0.352335	OR4F6	olfactory receptor family 4 subfamily F member 6
8026638	0.3486	0.00967	2.84198	-2.5733	0.260933	MYO9B	myosin IXB
7989094	0.3486	0.00967	-2.84186	-2.5736	-0.477947	NEDD4	neural precursor cell expressed, developmentally down-regulated 4, E3 ubiquitin protein ligase
7923034	0.3486	0.00967	-2.84184	-2.5736	-0.4638	B3GALT2	beta-1,3-galactosyltransferase 2
8132376	0.3486	0.00967	-2.84168	-2.5739	-0.356385	STARD3NL	STARD3 N-terminal like
7928107	0.3488	0.0097	2.84055	-2.576	0.468746	H2AFY2	H2A histone family member Y2
7907124	0.3488	0.0097	-2.84046	-2.5762	-0.362018	TIPRL	TOR signaling pathway regulator
7917148	0.3488	0.00972	-2.83952	-2.5779	-0.468712	AIDA	axin interactor, dorsalization associated
7991209	0.3488	0.00974	-2.83876	-2.5794	-0.344272	MRPL46	mitochondrial ribosomal protein L46
8145889	0.3488	0.00974	2.83847	-2.5799	0.421697	EIF4EBP1	eukaryotic translation initiation factor 4E binding protein 1
8118826	0.3488	0.00977	-2.83747	-2.5817	-0.271272	SNRPC	small nuclear ribonucleoprotein polypeptide C
8061396	0.3488	0.00978	2.83684	-2.5829	0.231783	CST13P	cystatin 13, pseudogene
7981161	0.3488	0.00979	2.83637	-2.5838	0.509366	SYNE3	spectrin repeat containing nuclear envelope family member 3
8099506	0.3489	0.00982	-2.83508	-2.5862	-0.337666	TAPT1	transmembrane anterior posterior transformation 1
7988327	0.3492	0.00985	2.83372	-2.5887	0.312817	PATL2	PAT1 homolog 2
8021707	0.35	0.0099	-2.83165	-2.5926	-0.403658	SOCS6	suppressor of cytokine signaling 6
8137739	0.35	0.00991	2.83099	-2.5938	0.312631	INTS1	integrator complex subunit 1
7981488	0.35	0.00992	2.83059	-2.5946	0.282339	TMEM179	transmembrane protein 179
8040802	0.35	0.00992	2.83046	-2.5948	0.32504	KHK	ketohexokinase
8000978	0.3501	0.00994	2.82979	-2.596	0.607445	PRSS53	protease, serine 53
8073733	0.3502	0.00997	-2.82817	-2.5991	-0.274912	NUP50	nucleoporin 50
7990965	0.3502	0.00998	-2.82786	-2.5996	-0.33166	RPS17	ribosomal protein L31
7984405	0.3502	0.01	-2.82702	-2.6012	-0.431895	C15orf61	chromosome 15 open reading frame 61
8011214	0.3502	0.01	2.82685	-2.6015	0.367724	RTN4RL1	reticulon 4 receptor like 1
8160036	0.3513	0.0101	-2.82439	-2.6061	-0.43687	TMEM261	transmembrane protein 261
7944632	0.3513	0.0101	2.82362	-2.6075	0.326676	TECTA	tectorin alpha
7908728	0.3532	0.0102	2.81941	-2.6153	0.334967	RNU6-501P	RNA, U6 small nuclear 501, pseudogene
8045514	0.3532	0.0102	-2.81934	-2.6155	-0.318937	SPOPL	speckle type BTB/POZ protein like
7994609	0.3532	0.0102	2.81851	-2.617	0.382831	QPRT	quinolinate phosphoribosyltransferase
8119080	0.3532	0.0102	-2.81784	-2.6182	-0.429174	SRSF3	serine and arginine rich splicing factor 3
8157383	0.3532	0.0102	2.81669	-2.6204	0.474729	COL27A1	collagen type XXVII alpha 1 chain
8086028	0.3532	0.0102	-2.81656	-2.6206	-0.346842	GLB1	galactosidase beta 1
7948424	0.3532	0.0103	-2.81459	-2.6243	-0.326145	MRPL16	mitochondrial ribosomal protein L16
7944275	0.3532	0.0103	2.81393	-2.6255	0.41527	TMEM25	transmembrane protein 25
7916393	0.3532	0.0103	2.81363	-2.6261	0.321813	CYB5RL	cytochrome b5 reductase like
8027650	0.3532	0.0103	-2.81347	-2.6264	-0.346968	UBA2	ubiquitin like modifier activating enzyme 2
8132617	0.3532	0.0103	2.81343	-2.6264	0.362018	ZMIZ2	zinc finger MIZ-type containing 2
7986947	0.3532	0.0103	2.81354	-2.6262	0.644516	GOLGA8T///GOLGA8J///GOLGA8IP	olfactory receptor family 7 subfamily E member 125 pseudogene
8149330	0.3532	0.0104	-2.81147	-2.6301	-0.277659	CTSB	cathepsin B
8065124	0.3532	0.0104	-2.81022	-2.6324	-0.224117	BFSP1	beaded filament structural protein 1
8159491	0.3532	0.0104	2.81019	-2.6324	0.479928	C8G	complement component 8, gamma polypeptide
8095894	0.3532	0.0104	-2.80898	-2.6347	-0.377745	MRPL1	mitochondrial ribosomal protein L1
8117888	0.3532	0.0104	-2.80828	-2.636	-0.262385	RAN	RAN, member RAS oncogene family
7905938	0.3532	0.0104	-2.80797	-2.6366	-0.277881	SLC50A1	solute carrier family 50 member 1
8081925	0.3532	0.0105	2.80691	-2.6385	0.287967	NR1I2	nuclear receptor subfamily 1 group I member 2
8147344	0.3532	0.0105	-2.80676	-2.6388	-0.331778	PDP1	pyruvate dehyrogenase phosphatase catalytic subunit 1
8057736	0.3532	0.0105	-2.80654	-2.6392	-0.339533	NEMP2	nuclear envelope integral membrane protein 2
8110920	0.3532	0.0105	-2.80548	-2.6412	-0.377408	FASTKD3	FAST kinase domains 3
8147206	0.3532	0.0105	-2.80541	-2.6413	-0.384082	RIPK2	receptor interacting serine/threonine kinase 2
7988672	0.3532	0.0105	2.80501	-2.6421	0.357396	HDC	histidine decarboxylase
8168146	0.3532	0.0105	-2.805	-2.6421	-0.448822	KIF4A	kinesin family member 4A
8135821	0.3532	0.0105	-2.80456	-2.6429	-0.207293	LMOD2///LMOD2	leiomodin 2///leiomodin 2
8163972	0.3532	0.0105	-2.80414	-2.6437	-0.322143	RC3H2	ring finger and CCCH-type domains 2
7927389	0.3532	0.0106	-2.80304	-2.6457	-0.340349	MAPK8	mitogen-activated protein kinase 8
7947015	0.3532	0.0106	-2.80255	-2.6466	-0.263668	TSG101	tumor susceptibility 101
7912595	0.3532	0.0106	2.80219	-2.6473	0.286087	PRAMEF14///PRAMEF2///PRAMEF1	PRAME family member 14///PRAME family member 2///PRAME family member 1
7985134	0.3532	0.0106	-2.80135	-2.6488	-0.318025	IDH3A	isocitrate dehydrogenase 3 (NAD(+)) alpha
8097704	0.3532	0.0106	-2.80128	-2.649	-0.34749	TMEM184C	transmembrane protein 184C
8144253	0.3532	0.0106	2.80118	-2.6491	0.325156	DLGAP2	DLG associated protein 2
7996361	0.3532	0.0106	2.80085	-2.6498	0.386483	CES3	carboxylesterase 3
8103859	0.3532	0.0106	-2.80052	-2.6504	-0.315198	DCTD	dCMP deaminase
8131949	0.3532	0.0106	-2.79939	-2.6525	-0.315799	CBX3	chromobox 3
7908421	0.3532	0.0106	-2.79918	-2.6529	-0.53197	TROVE2	TROVE domain family member 2
8002133	0.3532	0.0107	2.79833	-2.6544	0.383591	PSMB10	proteasome subunit beta 10
8081676	0.3532	0.0107	-2.79775	-2.6555	-0.407045	GTPBP8	GTP binding protein 8 (putative)
7934367	0.3532	0.0107	-2.79745	-2.656	-0.256772	ANXA7	annexin A7
7942400	0.3532	0.0107	2.79633	-2.6581	0.530456	P2RY2	purinergic receptor P2Y2
7970251	0.3532	0.0107	-2.79624	-2.6583	-0.709373	PROZ	protein Z, vitamin K dependent plasma glycoprotein
8069532	0.3532	0.0107	-2.79617	-2.6584	-0.60712	HSPA13	heat shock protein family A (Hsp70) member 13
8002104	0.3535	0.0107	2.7952	-2.6602	0.459859	CENPT	centromere protein T
7975113	0.3537	0.0108	-2.79405	-2.6623	-0.471186	CHURC1	churchill domain containing 1
8105456	0.3537	0.0108	-2.79148	-2.6671	-0.315131	SETD9	SET domain containing 9
8169711	0.3537	0.0108	-2.79113	-2.6677	-0.395307	GLUD2	glutamate dehydrogenase 2
8116445	0.3537	0.0108	2.79102	-2.6679	0.325969	FLT4	fms related tyrosine kinase 4
7937415	0.3537	0.0108	2.79099	-2.668	0.331249	PHRF1	PHD and ring finger domains 1
7932966	0.3537	0.0108	-2.79095	-2.6681	-0.375321	ITGB1	integrin subunit beta 1
8170298	0.3537	0.0108	-2.7909	-2.6682	-0.254537	UBE2NL///UBE2N	ubiquitin conjugating enzyme E2 N like (gene/pseudogene)///ubiquitin conjugating enzyme E2 N
7917082	0.3537	0.0108	2.79083	-2.6683	0.230098	ASB17	ankyrin repeat and SOCS box containing 17
7985690	0.3537	0.0109	2.79073	-2.6685	0.317099	LOC440300	chondroitin sulfate proteoglycan 4 pseudogene
8135969	0.3537	0.0109	2.79053	-2.6689	0.249425	CCDC136	coiled-coil domain containing 136
8095333	0.356	0.011	-2.78333	-2.6822	-0.414127	EXOC5	Ski2 like RNA helicase
7922104	0.356	0.011	-2.78288	-2.683	-0.372734	GCSHP3///LOC729080///GCSH	ribosomal protein S17
8168749	0.3559	0.011	-2.78627	-2.6767	-0.429808	SRPX2	sushi repeat containing protein, X-linked 2
7936320	0.3559	0.011	-2.78608	-2.6771	-0.341421	RPL13AP6	ribosomal protein L13a pseudogene 6
8069208	0.356	0.011	2.78493	-2.6792	0.395316	COL18A1	collagen type XVIII alpha 1 chain
8153625	0.356	0.011	2.78359	-2.6817	0.509115	OPLAH	5-oxoprolinase (ATP-hydrolysing)
8051707	0.356	0.011	-2.78272	-2.6833	-0.396687	MAP4K3	mitogen-activated protein kinase kinase kinase kinase 3
8039477	0.356	0.0111	2.78074	-2.6869	0.272616	FAM71E2	family with sequence similarity 71 member E2
8134415	0.356	0.0111	-2.77966	-2.689	-0.294098	SDHAF3	succinate dehydrogenase complex assembly factor 3
7950838	0.356	0.0111	-2.77875	-2.6906	-0.269032	PICALM	phosphatidylinositol binding clathrin assembly protein
8147172	0.356	0.0112	-2.77863	-2.6908	-0.335377	CPNE3	copine 3
7942798	0.356	0.0112	2.77848	-2.6911	0.380949	USP35	ubiquitin specific peptidase 35
8129974	0.356	0.0112	-2.77827	-2.6915	-0.356704	FUCA2	fucosidase, alpha-L- 2, plasma
7968035	0.356	0.0112	2.77825	-2.6916	0.320851	SPATA13	spermatogenesis associated 13
7952475	0.356	0.0112	-2.77814	-2.6918	-0.869374	HEPN1///HEPACAM	hepatocellular carcinoma, down-regulated 1///hepatic and glial cell adhesion molecule
8103166	0.3563	0.0112	-2.77734	-2.6932	-0.378214	SH3D19	SH3 domain containing 19
7979033	0.3563	0.0112	-2.77472	-2.6981	-0.387472	SAV1	salvador family WW domain containing protein 1
7915498	0.3563	0.0113	2.7745	-2.6985	1.15044	LOC100131756	uncharacterized LOC100131756
7985636	0.3563	0.0113	2.7744	-2.6987	0.589896	SLC28A1	solute carrier family 28 member 1
7982006	0.3563	0.0113	-2.77338	-2.7005	-0.647991	SNORD116-29	small nucleolar RNA, C/D box 116-29
7905329	0.3563	0.0113	-2.77287	-2.7015	-0.586304	MLLT11	myeloid/lymphoid or mixed-lineage leukemia; translocated to, 11
7976336	0.3563	0.0113	-2.77157	-2.7039	-0.343658	UBR7	ubiquitin protein ligase E3 component n-recognin 7 (putative)
7974870	0.3563	0.0113	-2.77106	-2.7048	-0.476663	SNAPC1	small nuclear RNA activating complex polypeptide 1
8032974	0.3563	0.0114	2.77003	-2.7067	0.307713	SAFB2	scaffold attachment factor B2
7911989	0.3563	0.0114	-2.76966	-2.7074	-0.381425	RPL22	ribosomal protein L22
7985166	0.3563	0.0114	-2.76964	-2.7074	-0.428789	IREB2	iron responsive element binding protein 2
8030753	0.3563	0.0114	2.76942	-2.7079	0.245359	KLK3	kallikrein related peptidase 3
7926084	0.3563	0.0114	-2.7686	-2.7093	-0.270299	ATP5C1	ATP synthase, H+ transporting, mitochondrial F1 complex, gamma polypeptide 1
7944623	0.3563	0.0114	-2.76854	-2.7095	-0.413541	TBCEL	tubulin folding cofactor E like
8108873	0.3563	0.0114	2.7684	-2.7097	0.307676	ARHGAP26	Rho GTPase activating protein 26
7965112	0.3563	0.0114	-2.76828	-2.7099	-0.519595	PAWR	pro-apoptotic WT1 regulator
7978748	0.3563	0.0114	-2.76814	-2.7102	-0.483006	FBXO33	F-box protein 33
8141024	0.3563	0.0114	-2.76814	-2.7102	-0.45649	BET1	Bet1 golgi vesicular membrane trafficking protein
7904751	0.3574	0.0115	-2.76492	-2.7161	-0.377754	RBM8A	RNA binding motif protein 8A
8055862	0.3574	0.0115	-2.76435	-2.7172	-0.548037	ARL5A	ADP ribosylation factor like GTPase 5A
8016215	0.3574	0.0115	2.76358	-2.7186	0.342355	ARHGAP27	Rho GTPase activating protein 27
7920757	0.3584	0.0116	2.76131	-2.7228	0.357286	RUSC1-AS1///FDPS	RUSC1 antisense RNA 1///farnesyl diphosphate synthase
8039730	0.359	0.0117	-2.75883	-2.7274	-0.354595	ZSCAN18	zinc finger and SCAN domain containing 18
8009277	0.359	0.0117	-2.75868	-2.7276	-0.362335	RGS9	regulator of G-protein signaling 9
8003125	0.359	0.0117	2.75823	-2.7285	0.331981	TAF1C	TATA-box binding protein associated factor, RNA polymerase I subunit C
7924603	0.359	0.0117	-2.75781	-2.7292	-0.371824	LBR	lamin B receptor
8131965	0.359	0.0117	2.75673	-2.7312	0.354044	LOC441204	uncharacterized LOC441204
7950751	0.359	0.0117	2.75637	-2.7319	0.324476	SNORA70E	small nucleolar RNA, H/ACA box 70E
8078605	0.359	0.0117	2.75599	-2.7326	0.491094	C3orf35	chromosome 3 open reading frame 35
8077770	0.359	0.0117	-2.75745	-2.7299	-0.281753	BRK1	sorting nexin 29 pseudogene 1///sorting nexin 29 pseudogene 2///sorting nexin 29
7925743	0.359	0.0117	2.7565	-2.7317	0.393896	OR2T33///OR2T8///OR2T12	defensin beta 108 pseudogene 2///defensin beta 108 pseudogene 1///defensin beta 108B
8007730	0.3594	0.0118	2.75475	-2.7349	0.343122	ACBD4	acyl-CoA binding domain containing 4
8047641	0.3598	0.0118	-2.75373	-2.7368	-0.336671	CYP20A1	cytochrome P450 family 20 subfamily A member 1
8128698	0.3598	0.0118	-2.75343	-2.7373	-0.601538	SESN1	sestrin 1
7898623	0.3607	0.0119	-2.75141	-2.741	-0.971242	UBXN10	UBX domain protein 10
7981976	0.3607	0.0119	-2.75109	-2.7416	-0.628397	SNORD116-14	small nucleolar RNA, C/D box 116-14
7996041	0.3607	0.0119	-2.75058	-2.7425	-0.242825	COQ9	coenzyme Q9
7988987	0.3607	0.0119	2.75026	-2.7431	0.459641	ONECUT1	one cut homeobox 1
8039706	0.3609	0.0119	-2.7496	-2.7443	-0.34541	ZNF256	zinc finger protein 256
8151561	0.3627	0.012	-2.74701	-2.7491	-0.410846	ZFAND1	zinc finger AN1-type containing 1
7924526	0.3635	0.012	-2.74552	-2.7518	-0.547456	TP53BP2	tumor protein p53 binding protein 2
8148710	0.3638	0.012	-2.74475	-2.7533	-0.276911	EXOSC4	exosome component 4
8003953	0.3641	0.0121	-2.74366	-2.7553	-0.407647	PSMB6	proteasome subunit beta 6
7914194	0.3642	0.0121	-2.74306	-2.7564	-0.405435	DNAJC8	DnaJ heat shock protein family (Hsp40) member C8
7984588	0.3642	0.0121	2.74245	-2.7575	0.384684	THSD4	thrombospondin type 1 domain containing 4
7971905	0.3648	0.0121	-2.74036	-2.7613	-1.12658	PCDH20	protocadherin 20
8027956	0.3648	0.0122	2.73983	-2.7623	0.317795	KMT2B	lysine methyltransferase 2B
7982574	0.3648	0.0122	-2.7395	-2.7629	-0.368713	FAM98B	family with sequence similarity 98 member B
8010295	0.3653	0.0122	2.73835	-2.765	0.595741	ENGASE	endo-beta-N-acetylglucosaminidase
8152597	0.3653	0.0122	-2.73817	-2.7654	-0.353036	MRPL13	mitochondrial ribosomal protein L13
8087461	0.3654	0.0122	2.73707	-2.7674	0.401462	GMPPB	GDP-mannose pyrophosphorylase B
7973826	0.3654	0.0123	-2.73645	-2.7685	-0.414516	NUBPL	nucleotide binding protein like
8097647	0.3654	0.0123	-2.73634	-2.7687	-0.496381	ABCE1	ATP binding cassette subfamily E member 1
8143605	0.3656	0.0123	-2.73499	-2.7712	-0.377248	TCAF1	TRPM8 channel associated factor 1
7956978	0.3656	0.0123	-2.73494	-2.7713	-0.2488	SLC35E3	solute carrier family 35 member E3
7997381	0.3656	0.0123	-2.73491	-2.7713	-0.386633	CMC2///CENPN	C-X9-C motif containing 2///centromere protein N
8044574	0.3657	0.0124	-2.73301	-2.7748	-0.789292	IL1RN	interleukin 1 receptor antagonist
8154381	0.3657	0.0124	-2.73271	-2.7754	-0.843156	LURAP1L	leucine rich adaptor protein 1 like
7917472	0.3657	0.0124	-2.73201	-2.7766	-0.330865	GTF2B	general transcription factor IIB
7917604	0.3657	0.0124	-2.73158	-2.7774	-0.594283	ZNF644	zinc finger protein 644
7984943	0.3657	0.0124	2.73154	-2.7775	0.397372	PPCDC	phosphopantothenoylcysteine decarboxylase
7901895	0.3657	0.0124	-2.73143	-2.7777	-0.368679	ATG4C	autophagy related 4C cysteine peptidase
7982620	0.3657	0.0124	-2.73069	-2.7791	-0.284051	EIF2AK4	eukaryotic translation initiation factor 2 alpha kinase 4
8141843	0.3657	0.0124	2.72974	-2.7808	0.861138	RASA4	RAS p21 protein activator 4
8027074	0.3657	0.0125	2.72787	-2.7842	0.230972	UPF1	UPF1, RNA helicase and ATPase
8111932	0.3657	0.0125	-2.72718	-2.7855	-0.418275	CCL28	C-C motif chemokine ligand 28
8094408	0.3657	0.0125	-2.72686	-2.7861	-0.403468	ANAPC4	anaphase promoting complex subunit 4
8141595	0.3657	0.0125	2.72607	-2.7875	0.273331	GIGYF1	GRB10 interacting GYF protein 1
8132660	0.3657	0.0126	2.72579	-2.788	0.404582	RAMP3	receptor (G protein-coupled) activity modifying protein 3
8008454	0.3657	0.0126	2.72449	-2.7904	0.380709	ABCC3	ATP binding cassette subfamily C member 3
8066609	0.3657	0.0126	2.72442	-2.7906	0.78418	SPATA25	spermatogenesis associated 25
8017235	0.3657	0.0126	-2.72423	-2.7909	-0.389838	APPBP2	amyloid beta precursor protein binding protein 2
8101143	0.3657	0.0126	-2.72408	-2.7912	-0.272592	NUP54	nucleoporin 54
8145005	0.3657	0.0126	2.72341	-2.7924	0.786724	DMTN	dematin actin binding protein
8069561	0.3657	0.0126	-2.72552	-2.7885	-0.32178	BTF3L4	BRICK1, SCAR/WAVE actin nucleating complex subunit
8120022	0.3662	0.0127	-2.72078	-2.7972	-0.308103	CDC5L	cell division cycle 5 like
7978628	0.3662	0.0127	-2.72016	-2.7984	-0.351256	PPP2R3C	protein phosphatase 2 regulatory subunit B''gamma
8148850	0.3662	0.0127	2.71941	-2.7997	0.332872	ADCK5	aarF domain containing kinase 5
7938880	0.3662	0.0127	-2.71937	-2.7998	-0.358222	HTATIP2	HIV-1 Tat interactive protein 2
7905631	0.3662	0.0127	2.71882	-2.8008	0.29401	INTS3	integrator complex subunit 3
8118974	0.3662	0.0127	-2.72041	-2.7979	-0.243807	RPL10A	retinoid X receptor beta
8158446	0.3662	0.0128	2.71786	-2.8026	0.219634	NUP188	nucleoporin 188
7933537	0.3662	0.0128	2.71645	-2.8052	0.285702	OGDHL	oxoglutarate dehydrogenase-like
8140814	0.3662	0.0128	-2.71558	-2.8067	-0.510005	SLC25A40	solute carrier family 25 member 40
8017671	0.3662	0.0128	2.71549	-2.8069	0.321464	LOC146880	Rho GTPase activating protein 27 pseudogene
8112728	0.3662	0.0129	-2.71215	-2.813	-0.339922	RAP1B	golgin A8 family member O///golgin A8 family member N///golgin A8 family member I, pseudogene
7981955	0.3662	0.0129	-2.71518	-2.8075	-0.706314	SNORD116-4///SNRPN	small nucleolar RNA, C/D box 116-4///small nuclear ribonucleoprotein polypeptide N
8114778	0.3662	0.0129	-2.71501	-2.8078	-0.425392	LOC729080///GCSH	glycine cleavage system protein H (aminomethyl carrier) pseudogene///glycine cleavage system protein H
8010702	0.3662	0.0129	2.71486	-2.808	0.390585	ASPSCR1	ASPSCR1, UBX domain containing tether for SLC2A4
7931187	0.3662	0.0129	-2.71429	-2.8091	-0.262612	BUB3	BUB3, mitotic checkpoint protein
7972674	0.3662	0.0129	-2.71401	-2.8096	-0.399261	TEX30	testis expressed 30
8025303	0.3662	0.0129	2.71392	-2.8098	0.725527	CLEC4M	C-type lectin domain family 4 member M
7902977	0.3662	0.0129	-2.71261	-2.8122	-0.438	KIAA1107	KIAA1107
8075659	0.3662	0.0129	2.71253	-2.8123	0.440629	MB	myoglobin
8054769	0.3662	0.013	-2.71152	-2.8142	-0.46898	PS1TP4///SLC35F5	HBV preS1-transactivated protein 4///solute carrier family 35 member F5
7915015	0.3662	0.013	-2.7112	-2.8148	-0.264092	GNL2	G protein nucleolar 2
8091087	0.3669	0.013	2.70928	-2.8183	0.318223	NMNAT3	nicotinamide nucleotide adenylyltransferase 3
8150908	0.3671	0.0131	-2.70745	-2.8216	-0.366335	IMPAD1	exocyst complex component 5
8171837	0.3671	0.0131	-2.70831	-2.82	-0.478286	KLHL15	kelch like family member 15
7973427	0.3671	0.0131	2.70771	-2.8211	0.316408	THTPA	thiamine triphosphatase
8039010	0.3684	0.0132	-2.70472	-2.8266	-0.366994	ZNF525///ZNF813///ZNF765///ZNF701///ZNF28	zinc finger protein 525///zinc finger protein 813///zinc finger protein 765///zinc finger protein 701///zinc finger protein 28
7953252	0.3684	0.0132	2.7046	-2.8268	0.233731	GALNT8	polypeptide N-acetylgalactosaminyltransferase 8
8097679	0.3684	0.0132	-2.70395	-2.828	-0.304252	LSM6	LSM6 homolog, U6 small nuclear RNA and mRNA degradation associated
7897026	0.3696	0.0133	2.7003	-2.8347	0.284111	CALML6	calmodulin like 6
8086627	0.3702	0.0133	2.69919	-2.8367	0.364391	ALS2CL	ALS2 C-terminal like
7964089	0.3706	0.0133	2.69831	-2.8383	0.339835	PAN2	PAN2 poly(A) specific ribonuclease subunit
7976976	0.371	0.0134	2.69711	-2.8405	0.22519	TECPR2	tectonin beta-propeller repeat containing 2
7937037	0.3714	0.0134	2.69507	-2.8442	0.554275	LOC100509814	uncharacterized LOC100509814
8053064	0.3714	0.0134	-2.69479	-2.8447	-0.469673	MOB1A	MOB kinase activator 1A
7953626	0.3714	0.0135	2.69463	-2.845	0.334077	CLSTN3	calsyntenin 3
8069131	0.3714	0.0135	2.69434	-2.8455	0.430182	LRRC3DN	LRRC3 downstream neighbor (non-protein coding)
7955107	0.3716	0.0135	2.6932	-2.8476	0.310257	CCDC184	coiled-coil domain containing 184
8024391	0.3716	0.0135	2.6927	-2.8485	0.326277	DOT1L	DOT1 like histone lysine methyltransferase
7907773	0.3716	0.0135	-2.69263	-2.8486	-0.327875	TOR1AIP1	torsin 1A interacting protein 1
8074473	0.3728	0.0136	2.69046	-2.8526	0.365131	CLDN5	claudin 5
7983335	0.3728	0.0136	-2.69036	-2.8528	-0.334977	CTDSPL2	CTD small phosphatase like 2
7951217	0.3728	0.0136	-2.69005	-2.8533	-0.640953	MMP7	matrix metallopeptidase 7
8020724	0.3731	0.0136	-2.68886	-2.8555	-0.516728	DSG1	desmoglein 1
7990457	0.3731	0.0136	2.68856	-2.8561	0.351721	MAN2C1	mannosidase alpha class 2C member 1
8143035	0.374	0.0137	-2.68629	-2.8602	-0.342767	EEF1G	eukaryotic translation elongation factor 1 gamma
8141560	0.374	0.0137	2.68562	-2.8614	0.339738	TFR2	transferrin receptor 2
8009844	0.374	0.0138	2.68423	-2.864	0.349126	LLGL2	LLGL2, scribble cell polarity complex component
8045499	0.3766	0.0139	-2.6792	-2.8731	-0.290888	HNMT	histamine N-methyltransferase
8142307	0.3766	0.0139	-2.67919	-2.8731	-0.503957	PNPLA8	patatin like phospholipase domain containing 8
8096669	0.3766	0.0139	2.67882	-2.8738	0.31647	TET2	tet methylcytosine dioxygenase 2
8180287	0.3757	0.0139	-2.68104	-2.8698	-0.324481	RPL31	WEE1 G2 checkpoint kinase
7970655	0.3766	0.014	-2.67826	-2.8748	-0.325049	MTMR6	myotubularin related protein 6
7987928	0.3766	0.014	2.67742	-2.8763	0.307687	CDAN1	codanin 1
8042772	0.3766	0.014	-2.67739	-2.8764	-0.174427	STAMBP	STAM binding protein
7953943	0.3768	0.014	-2.67657	-2.8779	-0.343414	GABARAPL1	GABA type A receptor associated protein like 1
8150565	0.3768	0.014	-2.67587	-2.8792	-0.29069	RNF170	ring finger protein 170
8113124	0.3768	0.014	-2.67542	-2.88	-0.445595	SLF1	SMC5-SMC6 complex localization factor 1
8075897	0.3768	0.0141	2.67488	-2.881	0.343044	C1QTNF6	C1q and tumor necrosis factor related protein 6
8083794	0.3768	0.0141	-2.67301	-2.8844	-0.374046	MYNN	myoneurin
8154153	0.3768	0.0141	-2.67267	-2.885	-0.416612	CDC37L1	cell division cycle 37 like 1
8174005	0.3768	0.0142	2.6716	-2.8869	0.23605	TRMT2B	tRNA methyltransferase 2 homolog B
8044417	0.3768	0.0142	-2.6714	-2.8873	-0.35225	TMEM87B	transmembrane protein 87B
8104022	0.3768	0.0142	-2.67127	-2.8875	-0.665656	PDLIM3	PDZ and LIM domain 3
7997158	0.3768	0.0142	-2.67125	-2.8876	-0.30011	MARVELD3	MARVEL domain containing 3
7959157	0.3768	0.0142	-2.67112	-2.8878	-0.284388	GATC	glutamyl-tRNA amidotransferase subunit C
7989224	0.3768	0.0142	-2.67065	-2.8886	-0.367327	ADAM10	ADAM metallopeptidase domain 10
8073962	0.3768	0.0142	-2.67011	-2.8896	-0.242506	MOV10L1	Mov10 RISC complex RNA helicase like 1
8025522	0.3768	0.0142	2.6701	-2.8896	1.09662	C3P1	complement component 3 precursor pseudogene
7907260	0.3768	0.0142	2.6699	-2.89	0.259301	FMO6P	flavin containing monooxygenase 6 pseudogene
7974587	0.3768	0.0142	-2.66931	-2.8911	-0.369707	ACTR10	actin-related protein 10 homolog
7962951	0.3768	0.0142	2.66894	-2.8918	0.328083	KMT2D	lysine methyltransferase 2D
7903541	0.3768	0.0143	-2.66794	-2.8936	-0.419721	STXBP3	syntaxin binding protein 3
7926356	0.3768	0.0143	-2.66762	-2.8941	-0.272005	C1QL3///PTER	complement C1q like 3///phosphotriesterase related
7987449	0.3768	0.0143	-2.66737	-2.8946	-0.284617	SRP14	signal recognition particle 14
8071920	0.3768	0.0143	-2.66575	-2.8975	-0.269145	GUCD1///SNRPD3	guanylyl cyclase domain containing 1///small nuclear ribonucleoprotein D3 polypeptide
7970241	0.3768	0.0144	-2.66379	-2.9011	-0.317952	F10	coagulation factor X
8038885	0.3768	0.0144	2.6637	-2.9013	0.505647	SIGLEC14	sialic acid binding Ig like lectin 14
8142471	0.3768	0.0144	2.66364	-2.9014	0.363458	WNT2	Wnt family member 2
8163505	0.3774	0.0145	2.66242	-2.9036	0.455185	HDHD3	haloacid dehalogenase like hydrolase domain containing 3
8010271	0.3783	0.0145	2.66027	-2.9075	0.416117	PGS1	phosphatidylglycerophosphate synthase 1
7996430	0.3786	0.0145	2.65963	-2.9086	0.544262	FBXL8///HSF4	ribosomal protein S7
8034920	0.3793	0.0146	2.6582	-2.9112	0.376289	ILVBL	ilvB acetolactate synthase like
8130891	0.3793	0.0146	2.65756	-2.9124	0.472882	WDR27	WD repeat domain 27
8042962	0.3793	0.0146	-2.65738	-2.9127	-0.397385	MRPL19	mitochondrial ribosomal protein L19
7972888	0.3793	0.0146	2.65742	-2.9126	0.822181	PCID2	chromodomain Y-linked 1B///chromodomain Y-linked 2B///chromodomain Y-linked 2A///chromodomain Y-linked 1
7940598	0.3811	0.0147	2.65468	-2.9176	0.309761	LOC399900	uncharacterized LOC399900
8166219	0.3811	0.0147	-2.65421	-2.9185	-0.277695	SYAP1	synapse associated protein 1
8105647	0.3812	0.0147	-2.65352	-2.9197	-0.317729	TRAPPC13	trafficking protein particle complex 13
8167305	0.3812	0.0148	2.65294	-2.9208	0.378898	EBP	emopamil binding protein (sterol isomerase)
8045619	0.3815	0.0148	-2.65232	-2.9219	-0.337079	EPC2	enhancer of polycomb homolog 2
8054513	0.3825	0.0148	2.6508	-2.9246	0.440605	LINC01123///LINC01106	long intergenic non-protein coding RNA 1123///long intergenic non-protein coding RNA 1106
7906194	0.3829	0.0149	2.64958	-2.9269	0.349445	GPATCH4	G-patch domain containing 4
7928999	0.3829	0.0149	2.64914	-2.9276	0.555358	LIPN	lipase family member N
7955063	0.3829	0.0149	-2.64872	-2.9284	-0.482429	TMEM106C	transmembrane protein 106C
7975995	0.3829	0.0149	2.64829	-2.9292	0.25802	C14orf178	chromosome 14 open reading frame 178
7927552	0.3829	0.0149	2.64744	-2.9307	0.617294	AGAP5///AGAP6///AGAP4	ArfGAP with GTPase domain, ankyrin repeat and PH domain 5///ArfGAP with GTPase domain, ankyrin repeat and PH domain 6///ArfGAP with GTPase domain, ankyrin repeat and PH domain 4
8164428	0.3829	0.0149	-2.64723	-2.9311	-0.258018	COQ4///TRUB2///TRUB2	coenzyme Q4///TruB pseudouridine synthase family member 2///TruB pseudouridine synthase family member 2
8104136	0.3829	0.0149	-2.64718	-2.9312	-0.369313	HMX1	H6 family homeobox 1
8136448	0.383	0.015	-2.6464	-2.9326	-0.288404	CHRM2	cholinergic receptor muscarinic 2
8113469	0.383	0.015	-2.64633	-2.9327	-0.342454	PJA2	praja ring finger ubiquitin ligase 2
8169006	0.3831	0.015	2.64483	-2.9354	0.307552	RAB40AL///RAB40A	RAB40A, member RAS oncogene family-like///RAB40A, member RAS oncogene family
7928318	0.3831	0.015	-2.64449	-2.9361	-0.293868	MCU	mitochondrial calcium uniporter
7900413	0.3831	0.0151	-2.64409	-2.9368	-0.361314	ZMPSTE24	zinc metallopeptidase STE24
8096538	0.3831	0.0151	-2.64364	-2.9376	-0.385195	RAP1GDS1	Rap1 GTPase-GDP dissociation stimulator 1
7945462	0.3831	0.0151	2.64329	-2.9382	0.374145	IRF7	interferon regulatory factor 7
7946054	0.3831	0.0151	2.64259	-2.9395	0.294947	HBG2///HBG1	hemoglobin subunit gamma 2///hemoglobin subunit gamma 1
8088548	0.3831	0.0151	2.64235	-2.9399	0.301565	LINC00994	long intergenic non-protein coding RNA 994
8102440	0.3831	0.0151	-2.64157	-2.9413	-0.338829	ARSJ	arylsulfatase family member J
7944375	0.3831	0.0151	-2.64139	-2.9417	-0.255161	TRAPPC4	trafficking protein particle complex 4
8100664	0.3832	0.0152	2.64092	-2.9425	0.243268	TMPRSS11D	transmembrane protease, serine 11D
8169920	0.3832	0.0152	-2.64054	-2.9432	-0.371922	RBMX2	RNA binding motif protein, X-linked 2
8096489	0.3835	0.0152	-2.63917	-2.9457	-0.342659	PDLIM5	PDZ and LIM domain 5
8121632	0.3835	0.0152	-2.63861	-2.9467	-0.576983	KPNA5	karyopherin subunit alpha 5
7973924	0.3835	0.0152	-2.63854	-2.9468	-0.19361	KIAA0391	KIAA0391
8068192	0.3836	0.0153	2.63765	-2.9484	0.265003	MRAP///URB1	melanocortin 2 receptor accessory protein///URB1 ribosome biogenesis 1 homolog (S. cerevisiae)
8064042	0.384	0.0153	2.63695	-2.9497	0.225584	ARFGAP1	ADP ribosylation factor GTPase activating protein 1
7998872	0.3844	0.0153	2.63601	-2.9514	0.255675	PRSS30P	protease, serine, 30 pseudogene
8117389	0.3844	0.0153	-2.63571	-2.9519	-0.362527	HIST1H2BE	histone cluster 1, H2be
8084496	0.3846	0.0153	2.63521	-2.9528	0.779418	CHRD	chordin
8157021	0.3856	0.0154	-2.63367	-2.9556	-0.322573	NIPSNAP3A	nipsnap homolog 3A
8013071	0.3867	0.0155	2.63133	-2.9598	0.31158	FLCN	folliculin
8003875	0.387	0.0155	2.63026	-2.9618	0.266081	SPNS2	sphingolipid transporter 2
8139966	0.387	0.0155	2.62994	-2.9624	0.319054	TRIM74///TRIM73	defensin alpha 1B///defensin alpha 3///defensin alpha 1
7920664	0.3873	0.0156	2.62931	-2.9635	0.481394	THBS3	thrombospondin 3
7918426	0.3874	0.0156	-2.62887	-2.9643	-0.538267	SLC16A4	solute carrier family 16 member 4
8156897	0.3875	0.0156	-2.62758	-2.9666	-0.307417	MSANTD3	Myb/SANT DNA binding domain containing 3
8103979	0.3875	0.0156	-2.62693	-2.9678	-0.330038	CFAP97	cilia and flagella associated protein 97
7982878	0.3875	0.0156	-2.62682	-2.968	-0.275054	CHP1	calcineurin like EF-hand protein 1
8031176	0.3875	0.0156	2.62668	-2.9682	0.49775	LENG8	leukocyte receptor cluster member 8
8127943	0.3878	0.0157	-2.62538	-2.9706	-0.433795	SNX14	sorting nexin 14
8030871	0.3878	0.0157	-2.62445	-2.9722	-0.229841	ZNF613	zinc finger protein 613
7935288	0.3878	0.0157	2.62427	-2.9726	0.232029	OPALIN	oligodendrocytic myelin paranodal and inner loop protein
8061490	0.3878	0.0157	2.62494	-2.9714	0.352096	LOC101926935///FAM182B///FAM182A	CART prepropeptide
7974455	0.388	0.0158	-2.62281	-2.9752	-0.324584	MAPK1IP1L	mitogen-activated protein kinase 1 interacting protein 1 like
8128726	0.388	0.0158	-2.62255	-2.9757	-0.297488	PPIL6	peptidylprolyl isomerase like 6
8118833	0.388	0.0158	2.62232	-2.9761	0.279107	UHRF1BP1	UHRF1 binding protein 1
8080226	0.388	0.0158	2.6221	-2.9765	0.679383	DNAH1	dynein axonemal heavy chain 1
7905974	0.388	0.0158	2.62204	-2.9766	0.356439	HCN3	hyperpolarization activated cyclic nucleotide gated potassium channel 3
7900624	0.3884	0.0158	2.62126	-2.978	0.289284	ZNF691	zinc finger protein 691
8168843	0.3897	0.0159	-2.61878	-2.9825	-0.334025	RPL36A	cyclin N-terminal domain containing 1///beclin 1
7903935	0.3892	0.0159	2.61997	-2.9803	0.307253	CHIAP2	chitinase, acidic pseudogene 2
8160900	0.3897	0.0159	2.61904	-2.982	0.304212	FAM205BP	transmembrane protein C9orf144B pseudogene
8029547	0.3899	0.0159	2.61815	-2.9836	0.491258	APOC4///APOC2	apolipoprotein C4///apolipoprotein C2
7946703	0.3899	0.0159	-2.61785	-2.9841	-0.388017	COPB1	coatomer protein complex subunit beta 1
8131719	0.3903	0.016	2.61709	-2.9855	0.50668	CDCA7L///DNAH11	cell division cycle associated 7 like///dynein axonemal heavy chain 11
8166049	0.3916	0.0161	-2.61442	-2.9903	-0.304302	PRPS2	phosphoribosyl pyrophosphate synthetase 2
7939492	0.3916	0.0161	-2.614	-2.9911	-0.4135	C11orf96	chromosome 11 open reading frame 96
8028248	0.3916	0.0161	-2.61385	-2.9913	-0.342356	ZNF570	zinc finger protein 570
7920175	0.3921	0.0161	2.61276	-2.9933	0.269806	FLG2	filaggrin family member 2
7957106	0.3921	0.0161	-2.61265	-2.9935	-0.310571	CNOT2	CCR4-NOT transcription complex subunit 2
7902660	0.3926	0.0162	-2.61091	-2.9966	-0.229299	WDR63	WD repeat domain 63
7983502	0.3926	0.0162	-2.61046	-2.9974	-0.358906	BLOC1S6	biogenesis of lysosomal organelles complex 1 subunit 6
7950447	0.3926	0.0162	2.61013	-2.998	0.400348	RNF169///XRRA1	ring finger protein 169///X-ray radiation resistance associated 1
7990700	0.3926	0.0162	-2.61013	-2.998	-0.199327	WDR61	WD repeat domain 61
7906688	0.3926	0.0162	2.61007	-2.9981	0.264401	PPOX	protoporphyrinogen oxidase
7982757	0.3939	0.0163	-2.60794	-3.002	-0.477324	KNL1	kinetochore scaffold 1
8066200	0.3948	0.0164	2.6062	-3.0051	0.223446	TTI1	TELO2 interacting protein 1
7945648	0.3948	0.0164	2.6059	-3.0056	0.401516	KRTAP5-2///KRTAP5-AS1	keratin associated protein 5-2///KRTAP5-1/KRTAP5-2 antisense RNA 1
8021783	0.3948	0.0164	2.60527	-3.0068	0.233573	ZNF236	zinc finger protein 236
8112841	0.3948	0.0164	-2.60515	-3.007	-0.47912	HOMER1	homer scaffolding protein 1
7963054	0.3948	0.0164	-2.60486	-3.0075	-0.443936	TUBA1A	tubulin alpha 1a
8048980	0.3954	0.0165	-2.6036	-3.0098	-0.299687	CAB39	calcium binding protein 39
8135915	0.3954	0.0165	2.60328	-3.0103	0.422771	HILPDA	hypoxia inducible lipid droplet associated
8004081	0.3954	0.0165	-2.60323	-3.0104	-0.356169	ZFP3	ZFP3 zinc finger protein
7998835	0.3954	0.0165	2.60253	-3.0117	0.757835	ERVK13-1	endogenous retrovirus group K13 member 1
8112202	0.3955	0.0165	-2.60208	-3.0125	-0.560599	PLK2	polo like kinase 2
8097570	0.3956	0.0166	-2.60063	-3.0151	-0.346092	USP38	ubiquitin specific peptidase 38
7957221	0.3956	0.0166	2.60002	-3.0162	0.922981	TRHDE-AS1///TRHDE	TRHDE antisense RNA 1///thyrotropin releasing hormone degrading enzyme
7960201	0.3956	0.0166	2.59995	-3.0163	0.627209	SLC6A13	solute carrier family 6 member 13
7930170	0.3956	0.0166	-2.59981	-3.0166	-0.420949	BORCS7-ASMT///BORCS7	BORCS7-ASMT readthrough (NMD candidate)///BLOC-1 related complex subunit 7
7971444	0.3956	0.0166	-2.59944	-3.0172	-0.199868	CPB2	carboxypeptidase B2
7947540	0.3956	0.0166	-2.59878	-3.0184	-0.2821	TRAF6	TNF receptor associated factor 6
7935892	0.3956	0.0166	2.59848	-3.019	0.296272	FGF8	fibroblast growth factor 8
8177951	0.3956	0.0166	2.59999	-3.0163	0.288973	HCG27	radial spoke head 10 homolog B2///radial spoke head 10 homolog B
8081073	0.3958	0.0167	-2.59734	-3.021	-0.379951	C3orf38///CGGBP1	chromosome 3 open reading frame 38///CGG triplet repeat binding protein 1
8042801	0.3958	0.0167	-2.59606	-3.0233	-0.266058	DGUOK	deoxyguanosine kinase
8095009	0.3958	0.0168	-2.59546	-3.0244	-0.385999	DCUN1D4	defective in cullin neddylation 1 domain containing 4
8064502	0.3958	0.0168	-2.59516	-3.0249	-0.354883	SNRPB	small nuclear ribonucleoprotein polypeptides B and B1
7942697	0.3958	0.0168	2.59458	-3.026	0.382518	CAPN5	calpain 5
8146429	0.3958	0.0168	2.59423	-3.0266	0.82601	NPBWR1	neuropeptides B/W receptor 1
8120826	0.3958	0.0168	-2.5931	-3.0286	-0.326749	IRAK1BP1	interleukin 1 receptor associated kinase 1 binding protein 1
7920492	0.3958	0.0168	-2.59292	-3.0289	-0.205612	C1orf43	chromosome 1 open reading frame 43
8046680	0.3958	0.0169	-2.59273	-3.0293	-0.40964	PLEKHA3	pleckstrin homology domain containing A3
7941985	0.3958	0.0169	2.59197	-3.0306	0.490599	TCIRG1	T-cell immune regulator 1, ATPase H+ transporting V0 subunit a3
8074927	0.3958	0.0169	2.5919	-3.0308	0.534076	GUSBP11	glucuronidase, beta pseudogene 11
7989347	0.3958	0.0169	-2.59186	-3.0308	-0.363805	ICE2	interactor of little elongation complex ELL subunit 2
7986132	0.3958	0.0169	2.59133	-3.0318	0.328148	MAN2A2	mannosidase alpha class 2A member 2
8140620	0.3958	0.0169	2.59124	-3.0319	0.314253	PCLO	piccolo presynaptic cytomatrix protein
8170400	0.3958	0.0169	2.59273	-3.0293	0.31576	LOC642980	defensin alpha 1B///defensin alpha 3///defensin alpha 1
8050240	0.3958	0.017	-2.58969	-3.0347	-0.485495	ODC1	ornithine decarboxylase 1
7911170	0.3958	0.017	2.58948	-3.0351	0.296937	LINC01341	long intergenic non-protein coding RNA 1341
8093601	0.3958	0.017	2.5893	-3.0354	0.296653	FAM193A	family with sequence similarity 193 member A
8157216	0.3958	0.017	-2.58803	-3.0377	-0.464487	UGCG	UDP-glucose ceramide glucosyltransferase
8055645	0.3958	0.017	-2.58788	-3.038	-0.360911	ORC4	origin recognition complex subunit 4
8163548	0.3958	0.017	2.5876	-3.0385	0.554623	KIF12	kinesin family member 12
8013159	0.3958	0.017	2.58888	-3.0362	0.261437	TOM1L2	ras-related C3 botulinum toxin substrate 1 (rho family, small GTP binding protein Rac1)
8127637	0.3958	0.0171	-2.58585	-3.0416	-0.340108	TMEM30A	transmembrane protein 30A
7923073	0.3958	0.0171	-2.58559	-3.0421	-0.360599	F13B	coagulation factor XIII B chain
8165462	0.3958	0.0171	2.58544	-3.0423	0.273244	ANAPC2	anaphase promoting complex subunit 2
8099633	0.3958	0.0171	-2.58516	-3.0428	-0.797351	PPARGC1A	PPARG coactivator 1 alpha
8112331	0.3958	0.0172	-2.58355	-3.0457	-0.487051	ISCA1	iron-sulfur cluster assembly 1
8116484	0.3958	0.0172	2.58349	-3.0458	0.25709	MGAT1	mannosyl (alpha-1,3-)-glycoprotein beta-1,2-N-acetylglucosaminyltransferase
8093518	0.3958	0.0173	2.58169	-3.049	0.380352	FGFR3	fibroblast growth factor receptor 3
8086125	0.3958	0.0173	-2.58031	-3.0515	-0.333845	TRANK1	tetratricopeptide repeat and ankyrin repeat containing 1
7973679	0.3958	0.0173	2.58028	-3.0516	0.260983	NOP9///CIDEB	NOP9 nucleolar protein///cell death-inducing DFFA-like effector b
8123717	0.3958	0.0173	-2.57969	-3.0526	-0.24881	RPP40	ribonuclease P/MRP subunit p40
8054045	0.3958	0.0173	2.57967	-3.0527	0.304415	FAHD2B///FAHD2A	fumarylacetoacetate hydrolase domain containing 2B///fumarylacetoacetate hydrolase domain containing 2A
8122840	0.3958	0.0174	2.57864	-3.0545	0.289073	ESR1	estrogen receptor 1
8042811	0.3958	0.0174	2.57829	-3.0551	0.28197	TET3	tet methylcytosine dioxygenase 3
7943162	0.3958	0.0174	-2.57794	-3.0558	-0.351537	C11orf54	chromosome 11 open reading frame 54
8096905	0.3958	0.0174	-2.57784	-3.0559	-0.387697	AP1AR	adaptor related protein complex 1 associated regulatory protein
7931607	0.3958	0.0174	2.57781	-3.056	0.302091	MTG1	mitochondrial ribosome associated GTPase 1
8072206	0.3958	0.0175	2.57655	-3.0582	0.356379	EWSR1	EWS RNA binding protein 1
8099807	0.3958	0.0175	-2.57613	-3.059	-0.564272	GAFA3	FGF-2 activity-associated protein 3
8043718	0.3958	0.0175	-2.5756	-3.0599	-0.350375	COX5B	cytochrome c oxidase subunit 5B
8069991	0.3958	0.0175	-2.57553	-3.0601	-0.471951	TCP10L	t-complex 10-like
8020898	0.3958	0.0175	-2.57474	-3.0615	-0.40223	ZNF271P	zinc finger protein 271, pseudogene
7933405	0.3958	0.0175	2.57466	-3.0616	0.581037	AGAP12P///AGAP4	ArfGAP with GTPase domain, ankyrin repeat and PH domain 12, pseudogene///ArfGAP with GTPase domain, ankyrin repeat and PH domain 4
7927814	0.3958	0.0175	-2.57432	-3.0622	-0.360223	SIRT1	sirtuin 1
7981966	0.3958	0.0176	-2.57272	-3.0651	-0.484207	SNORD116-9///SNORD116-8///SNORD116-7///SNORD116-5///SNORD116-3///SNORD116-1	RAS p21 protein activator 4C, pseudogene///RAS p21 protein activator 4
8080001	0.3958	0.0176	2.57424	-3.0624	0.360932	HEMK1///C3orf18	HemK methyltransferase family member 1///chromosome 3 open reading frame 18
8062571	0.3958	0.0176	-2.57423	-3.0624	-0.328721	FAM83D	family with sequence similarity 83 member D
7981988	0.3958	0.0176	-2.57408	-3.0627	-0.562124	SNORD116-20	small nucleolar RNA, C/D box 116-20
8102247	0.3958	0.0176	2.57376	-3.0632	0.393145	RPL34-AS1	RPL34 antisense RNA 1 (head to head)
8167998	0.3958	0.0176	2.57301	-3.0646	0.333876	AR	androgen receptor
8041197	0.3958	0.0176	-2.57236	-3.0657	-0.224911	YPEL5	yippee like 5
8087731	0.3958	0.0176	2.57227	-3.0659	0.298064	C3orf18	chromosome 3 open reading frame 18
7957606	0.3958	0.0176	-2.57195	-3.0665	-0.403535	SUCLG2	succinate-CoA ligase GDP-forming beta subunit
7981949	0.3969	0.0177	-2.56948	-3.0709	-0.524211	SNORD116-1	small nucleolar RNA, C/D box 116-1
8072226	0.3969	0.0177	2.56926	-3.0713	0.467167	RFPL1	ret finger protein like 1
7936578	0.3969	0.0178	-2.56707	-3.0752	-0.400082	FAM204A	family with sequence similarity 204 member A
7897774	0.3969	0.0178	2.56667	-3.0759	0.426401	CLCN6	chloride voltage-gated channel 6
7938313	0.3969	0.0179	-2.56619	-3.0767	-0.342685	IPO7	importin 7
7973770	0.3969	0.0179	-2.56533	-3.0783	-0.430013	SCFD1	sec1 family domain containing 1
8147079	0.3969	0.0179	-2.56511	-3.0787	-0.361836	LRRCC1	leucine rich repeat and coiled-coil centrosomal protein 1
8030999	0.3969	0.0179	-2.56497	-3.0789	-0.615096	ZNF331	zinc finger protein 331
8010248	0.3969	0.0179	2.56456	-3.0797	0.286949	AFMID	arylformamidase
7982002	0.3969	0.018	-2.56388	-3.0809	-0.474136	SNORD116-27	small nucleolar RNA, C/D box 116-27
7991877	0.3969	0.018	2.56388	-3.0809	0.37947	CAPN15	calpain 15
7909350	0.3969	0.018	2.56373	-3.0811	0.20561	CR2	complement component 3d receptor 2
7981364	0.3969	0.018	-2.56355	-3.0814	-0.226076	CINP	cyclin dependent kinase 2 interacting protein
8016739	0.3969	0.018	-2.56277	-3.0828	-0.448249	TOB1	transducer of ERBB2, 1
8134621	0.3969	0.018	2.5626	-3.0831	0.222685	ZKSCAN5	zinc finger with KRAB and SCAN domains 5
7938004	0.3969	0.018	2.56235	-3.0836	0.283822	OR51Q1	olfactory receptor family 51 subfamily Q member 1 (gene/pseudogene)
8056693	0.3969	0.018	-2.56222	-3.0838	-0.372603	FASTKD1	FAST kinase domains 1
7957177	0.3969	0.018	-2.56201	-3.0842	-0.456765	RAB21	RAB21, member RAS oncogene family
7966332	0.3969	0.018	-2.56178	-3.0846	-0.277474	VPS29	VPS29, retromer complex component
8041000	0.3969	0.018	-2.5617	-3.0847	-0.284452	GPN1	GPN-loop GTPase 1
8009913	0.3969	0.018	2.56291	-3.0826	0.471789	MYO15B	ubiquitin conjugating enzyme E2 D3
8152053	0.3979	0.0181	-2.55953	-3.0886	-0.309135	ANKRD46	ankyrin repeat domain 46
8159371	0.3997	0.0183	2.55621	-3.0945	0.301581	MIR126	microRNA 126
7981964	0.3997	0.0183	-2.55591	-3.0951	-0.496186	SNORD116-9///SNORD116-8///SNORD116-7///SNORD116-6///SNORD116-5///SNORD116-4///SNORD116-3///SNORD116-2	small nucleolar RNA, C/D box 116-9///small nucleolar RNA, C/D box 116-8///small nucleolar RNA, C/D box 116-7///small nucleolar RNA, C/D box 116-6///small nucleolar RNA, C/D box 116-5///small nucleolar RNA, C/D box 116-4///small nucleolar RNA, C/D box 116-3///small nucleolar RNA, C/D box 116-2
8001111	0.4003	0.0183	-2.55491	-3.0968	-0.325933	UBE2MP1///UBE2M	ubiquitin conjugating enzyme E2 M pseudogene 1///ubiquitin conjugating enzyme E2 M
7976726	0.4012	0.0184	2.5536	-3.0992	0.341308	EVL	Enah/Vasp-like
8040163	0.4014	0.0184	-2.55283	-3.1006	-0.222577	IAH1	isoamyl acetate-hydrolyzing esterase 1 homolog
7968199	0.4017	0.0184	-2.55211	-3.1018	-0.306472	CDK8	cyclin dependent kinase 8
8164008	0.4024	0.0185	2.55109	-3.1036	0.500645	MIR600HG	MIR600 host gene
7971590	0.4027	0.0185	-2.54968	-3.1062	-0.400567	CAB39L	calcium binding protein 39 like
8107100	0.4027	0.0185	-2.54968	-3.1062	-0.436905	RGMB	repulsive guidance molecule family member b
7982810	0.4033	0.0186	2.54853	-3.1082	0.250233	C15orf62	chromosome 15 open reading frame 62
8083616	0.404	0.0186	-2.54747	-3.1101	-0.372584	MLF1	myeloid leukemia factor 1
7958414	0.4043	0.0187	-2.54636	-3.112	-0.232024	ISCU	iron-sulfur cluster assembly enzyme
8106479	0.4043	0.0187	-2.5463	-3.1122	-0.417309	SCAMP1	secretory carrier membrane protein 1
8144982	0.4043	0.0187	-2.54564	-3.1133	-0.271532	NPM2	nucleophosmin/nucleoplasmin 2
7944195	0.4043	0.0187	-2.54558	-3.1134	-0.190128	UBE4A	ubiquitination factor E4A
7995242	0.4044	0.0187	2.54438	-3.1156	0.513155	CLUHP3	clustered mitochondria homolog pseudogene 3
8144279	0.4044	0.0187	2.54508	-3.1143	0.54628	CLN8	speedy/RINGO cell cycle regulator family member E2B///speedy/RINGO cell cycle regulator family member E6///speedy/RINGO cell cycle regulator family member E2///speedy/RINGO cell cycle regulator family member E7, pseudogene///speedy/RINGO cell cycle regulator family member E1
8141206	0.4044	0.0188	-2.54294	-3.1181	-0.384364	BAIAP2L1	BAI1 associated protein 2 like 1
8164883	0.4044	0.0188	-2.54211	-3.1196	-0.257991	SURF4	surfeit 4
8138922	0.4044	0.0189	-2.54152	-3.1207	-0.424716	KBTBD2	kelch repeat and BTB domain containing 2
8017964	0.4044	0.0189	-2.5412	-3.1212	-0.348839	ABCA6	ATP binding cassette subfamily A member 6
8069153	0.4044	0.0189	2.54099	-3.1216	0.304537	KRTAP10-10	keratin associated protein 10-10
7983054	0.4044	0.0189	2.54036	-3.1227	0.627702	GANC///CAPN3	glucosidase alpha, neutral C///calpain 3
8023727	0.4044	0.0189	-2.54009	-3.1232	-0.555781	DSEL	dermatan sulfate epimerase-like
8033740	0.4044	0.0189	2.53981	-3.1237	0.341582	OR7D4	olfactory receptor family 7 subfamily D member 4
8065071	0.4044	0.0189	-2.53957	-3.1241	-0.643999	FLRT3	fibronectin leucine rich transmembrane protein 3
8069399	0.4046	0.019	2.53814	-3.1267	0.256374	DIP2A	disco interacting protein 2 homolog A
7943827	0.4046	0.019	-2.53804	-3.1268	-0.302634	DLAT	dihydrolipoamide S-acetyltransferase
8160531	0.4046	0.0191	-2.53673	-3.1292	-0.530966	C9orf72	chromosome 9 open reading frame 72
8041225	0.4046	0.0191	2.53531	-3.1317	0.65371	EHD3	EH domain containing 3
7978595	0.4046	0.0191	-2.53522	-3.1318	-0.315323	BAZ1A	bromodomain adjacent to zinc finger domain 1A
8145201	0.4046	0.0191	2.53468	-3.1328	0.224582	CCAR2	cell cycle and apoptosis regulator 2
7981538	0.4046	0.0191	2.53451	-3.1331	0.291206	JAG2	jagged 2
8180344	0.4046	0.0191	-2.53637	-3.1298	-0.252601	GNAQ	immediate early response 3
7927353	0.4046	0.0191	2.53465	-3.1329	0.5746	AGAP5///AGAP9///AGAP12P///AGAP4	uncharacterized LOC102724238///glioblastoma down-regulated RNA
8067610	0.4046	0.0192	2.53422	-3.1336	0.935015	CHRNA4	cholinergic receptor nicotinic alpha 4 subunit
8020814	0.4046	0.0192	-2.5339	-3.1342	-0.324175	RNF138	ring finger protein 138
8016390	0.4051	0.0192	2.53258	-3.1365	0.332849	COPZ2	coatomer protein complex subunit zeta 2
7934753	0.4046	0.0192	-2.53407	-3.1339	-0.248551	EIF5AL1///EIF5A	protein-L-isoaspartate (D-aspartate) O-methyltransferase domain containing 1
8171348	0.4053	0.0193	-2.53178	-3.1379	-0.210348	ATXN3L	ataxin 3 like
8034772	0.4053	0.0193	-2.53105	-3.1392	-0.465586	ASF1B	anti-silencing function 1B histone chaperone
7956426	0.4053	0.0193	2.53075	-3.1398	0.848007	INHBE	inhibin beta E subunit
7905131	0.4053	0.0193	-2.5307	-3.1399	-0.577765	CA14	carbonic anhydrase 14
8175562	0.4053	0.0193	-2.53027	-3.1406	-0.242198	MAGEC2	MAGE family member C2
8148280	0.4053	0.0193	2.53011	-3.1409	0.833025	SQLE	squalene epoxidase
7989323	0.4053	0.0193	-2.52999	-3.1411	-0.461123	BNIP2	BCL2 interacting protein 2
7946069	0.4053	0.0193	2.52983	-3.1414	0.382863	OR51B2	olfactory receptor family 51 subfamily B member 2 (gene/pseudogene)
7945974	0.4064	0.0194	2.52803	-3.1446	0.230628	C11orf40	chromosome 11 open reading frame 40
8134079	0.4065	0.0195	-2.52641	-3.1475	-0.412901	GTPBP10	GTP binding protein 10
8085788	0.4065	0.0195	-2.52633	-3.1476	-0.394877	NKIRAS1	NFKB inhibitor interacting Ras like 1
7918622	0.4065	0.0195	-2.52628	-3.1477	-0.415277	SLC16A1	solute carrier family 16 member 1
7975412	0.4065	0.0195	-2.52601	-3.1482	-0.53304	TTC9	tetratricopeptide repeat domain 9
8018102	0.4065	0.0195	2.5258	-3.1485	0.337109	CPSF4L	cleavage and polyadenylation specific factor 4 like
7971644	0.4066	0.0195	-2.52547	-3.1491	-0.305073	SPRYD7	SPRY domain containing 7
7993825	0.4065	0.0195	2.52618	-3.1479	0.535304	SNX29P1///SNX29P2///SNX29	ST6 N-acetylgalactosaminide alpha-2,6-sialyltransferase 1
8163063	0.407	0.0196	-2.52466	-3.1506	-0.445328	CTNNAL1	catenin alpha like 1
8084067	0.407	0.0196	-2.52436	-3.1511	-0.265525	ACTL6A	actin like 6A
7918902	0.407	0.0196	-2.52309	-3.1533	-0.3288	CD58	CD58 molecule
7957551	0.407	0.0196	-2.52296	-3.1536	-0.892959	SOCS2	suppressor of cytokine signaling 2
7997010	0.407	0.0196	2.52382	-3.152	0.262237	CLEC18B///CLEC18A///CLEC18C	C1D nuclear receptor corepressor
8018400	0.4071	0.0197	2.5223	-3.1547	0.293876	RECQL5	RecQ like helicase 5
8016463	0.4071	0.0197	-2.52117	-3.1567	-0.280623	HOXB6	homeobox B6
7977497	0.4071	0.0197	-2.52041	-3.1581	-0.434994	CCNB1IP1	cyclin B1 interacting protein 1
8068266	0.4071	0.0197	-2.52033	-3.1582	-0.340366	IFNAR1	interferon alpha and beta receptor subunit 1
7921862	0.4071	0.0197	-2.52031	-3.1583	-0.443011	CFAP126	cilia and flagella associated protein 126
8007550	0.4071	0.0198	2.51967	-3.1594	0.40082	NAGS	N-acetylglutamate synthase
8160016	0.4071	0.0198	-2.5196	-3.1595	-0.404081	RANBP6	RAN binding protein 6
8047127	0.4071	0.0198	-2.51935	-3.16	-0.300868	MYO1B	myosin IB
8128034	0.4071	0.0198	-2.51898	-3.1606	-0.454998	AKIRIN2	akirin 2
8061324	0.4071	0.0198	-2.51863	-3.1612	-0.287729	XRN2	5'-3' exoribonuclease 2
8033780	0.4071	0.0198	-2.51795	-3.1624	-0.373597	ZNF426	zinc finger protein 426
8117458	0.4071	0.0199	2.51709	-3.164	0.382344	BTN3A1	butyrophilin subfamily 3 member A1
8036676	0.4071	0.0199	2.51766	-3.1629	0.501061	FBXO17	coiled-coil domain containing 82
7919751	0.4071	0.02	-2.51501	-3.1676	-0.416931	MCL1	BCL2 family apoptosis regulator
8002249	0.4071	0.02	2.51498	-3.1677	0.571353	SMPD3	sphingomyelin phosphodiesterase 3
8169617	0.4071	0.02	-2.51494	-3.1678	-0.198967	PGRMC1	progesterone receptor membrane component 1
7955156	0.4071	0.02	2.51476	-3.1681	0.269499	CCDC65	coiled-coil domain containing 65
8118409	0.4071	0.02	2.5146	-3.1683	0.254243	STK19///C4B///C4A	serine/threonine kinase 19///complement component 4B (Chido blood group)///complement component 4A (Rodgers blood group)
8118455	0.4071	0.02	2.5146	-3.1683	0.254243	C4B///C4A	complement component 4B (Chido blood group)///complement component 4A (Rodgers blood group)
8022338	0.4074	0.02	-2.51378	-3.1698	-0.320372	LOC100996333///ADGRA3	G protein-coupled receptor 125 pseudogene///adhesion G protein-coupled receptor A3
8089112	0.4074	0.02	-2.51378	-3.1698	-0.628356	FILIP1L	filamin A interacting protein 1 like
8067409	0.4078	0.0201	2.5123	-3.1724	0.595679	LAMA5	laminin subunit alpha 5
8150266	0.4078	0.0201	-2.51197	-3.173	-0.250965	LSM1	LSM1 homolog, mRNA degradation associated
8078008	0.4078	0.0201	-2.5119	-3.1731	-0.467625	LSM3	LSM3 homolog, U6 small nuclear RNA and mRNA degradation associated
8114068	0.4078	0.0201	2.51162	-3.1736	0.362183	SHROOM1	shroom family member 1
8145736	0.4086	0.0202	-2.50939	-3.1776	-0.85698	NRG1	myosin light chain 12B
7971197	0.4081	0.0202	-2.51053	-3.1755	-0.332416	ELF1	E74 like ETS transcription factor 1
7911600	0.4081	0.0202	2.51042	-3.1757	0.325527	NADK	NAD kinase
7953111	0.4086	0.0203	2.5086	-3.1789	0.330086	ITFG2///FKBP4	integrin alpha FG-GAP repeat containing 2///FK506 binding protein 4
7970546	0.4086	0.0203	-2.50853	-3.1791	-0.38781	MICU2	mitochondrial calcium uptake 2
7987381	0.4086	0.0203	-2.50852	-3.1791	-0.25006	CSNK1A1P1	casein kinase 1 alpha 1 pseudogene 1
7958677	0.4097	0.0203	2.50671	-3.1823	0.198167	RAD9B	RAD9 checkpoint clamp component B
8165575	0.4097	0.0203	2.50643	-3.1828	0.434327	PNPLA7	patatin like phospholipase domain containing 7
8078784	0.4102	0.0204	2.50528	-3.1848	0.285799	XYLB	xylulokinase
7903203	0.4102	0.0204	-2.50499	-3.1853	-0.387839	SNX7	sorting nexin 7
8123961	0.4105	0.0204	2.50442	-3.1863	0.302805	TBC1D7-LOC100130357///TBC1D7	TBC1D7-LOC100130357 readthrough///TBC1 domain family member 7
7958262	0.4108	0.0205	-2.50376	-3.1875	-0.586988	TCP11L2	t-complex 11 like 2
8000582	0.4111	0.0205	-2.50315	-3.1886	-0.544911	SULT1A2	sulfotransferase family 1A member 2
7956910	0.4112	0.0205	-2.50253	-3.1897	-0.257238	CAND1	cullin associated and neddylation dissociated 1
8168117	0.4116	0.0206	-2.50125	-3.1919	-0.244832	ARR3	arrestin 3
7951325	0.4116	0.0206	-2.50081	-3.1927	-0.436109	DCUN1D5	defective in cullin neddylation 1 domain containing 5
8171032	0.4116	0.0206	2.50073	-3.1928	0.349885	LOC101927830///TMLHE-AS1	uncharacterized LOC101927830///TMLHE antisense RNA 1
8131387	0.4116	0.0206	-2.50058	-3.1931	-0.241345	USP42	ubiquitin specific peptidase 42
7995539	0.4117	0.0207	2.49955	-3.1949	0.340391	NOD2	nucleotide binding oligomerization domain containing 2
8148923	0.4117	0.0207	2.4994	-3.1952	0.271242	LRRC24///LRRC14	leucine rich repeat containing 24///leucine rich repeat containing 14
8163896	0.4117	0.0207	-2.49926	-3.1954	-0.34362	STOM	stomatin
7994216	0.4118	0.0207	2.49875	-3.1963	0.341094	SLC5A11	solute carrier family 5 member 11
7933252	0.4123	0.0208	2.4972	-3.199	0.578772	AGAP5///AGAP9///AGAP12P///AGAP6///AGAP4	ArfGAP with GTPase domain, ankyrin repeat and PH domain 5///ArfGAP with GTPase domain, ankyrin repeat and PH domain 9///ArfGAP with GTPase domain, ankyrin repeat and PH domain 12, pseudogene///ArfGAP with GTPase domain, ankyrin repeat and PH domain 6///ArfGAP with GTPase domain, ankyrin repeat and PH domain 4
8101828	0.4123	0.0208	-2.49612	-3.2009	-0.479231	TSPAN5	tetraspanin 5
7939087	0.4123	0.0208	-2.49592	-3.2013	-0.301846	ARL14EP	ADP ribosylation factor like GTPase 14 effector protein
8038487	0.4123	0.0209	2.49459	-3.2036	0.197689	IL4I1///NUP62	interleukin 4 induced 1///nucleoporin 62
8123989	0.4123	0.0209	-2.49458	-3.2037	-0.254998	RANBP9	RAN binding protein 9
8112302	0.4123	0.0209	-2.49436	-3.2041	-0.316656	SMIM15	small integral membrane protein 15
7979864	0.4123	0.0209	-2.49431	-3.2041	-0.25214	ERH	enhancer of rudimentary homolog (Drosophila)
8052438	0.4124	0.0209	-2.49349	-3.2056	-0.383798	LOC339803	uncharacterized LOC339803
7898375	0.4123	0.0209	2.49385	-3.2049	0.370971	RNU1-1///RNU1-2///RNU1-3///RNVU1-18///RNU1-4	inositol monophosphatase domain containing 1
8132013	0.413	0.021	-2.49155	-3.209	-0.28878	CHN2	chimerin 2
8162586	0.4143	0.0211	-2.48943	-3.2127	-0.227874	SLC35D2	solute carrier family 35 member D2
8092849	0.4145	0.0211	-2.48889	-3.2137	-0.356217	ATP13A3	ATPase 13A3
8083826	0.4146	0.0212	-2.48858	-3.2142	-0.380342	SEC62	SEC62 homolog, preprotein translocation factor
7932023	0.415	0.0212	-2.48708	-3.2169	-0.279839	USP6NL	USP6 N-terminal like
8080878	0.415	0.0212	2.48706	-3.2169	0.251652	ATXN7	ataxin 7
8108912	0.4151	0.0213	2.48606	-3.2186	0.52205	SH3RF2	SH3 domain containing ring finger 2
7964927	0.4161	0.0214	-2.48415	-3.222	-1.15461	TSPAN8	tetraspanin 8
7964203	0.4161	0.0214	2.4829	-3.2242	0.334811	BAZ2A	bromodomain adjacent to zinc finger domain 2A
7926875	0.4161	0.0214	-2.48279	-3.2244	-0.637227	BAMBI	BMP and activin membrane bound inhibitor
7897154	0.4161	0.0214	2.48243	-3.225	0.337219	ARHGEF16	Rho guanine nucleotide exchange factor 16
8090639	0.4161	0.0214	-2.48237	-3.2251	-0.302927	PIK3R4	phosphoinositide-3-kinase regulatory subunit 4
8039017	0.4161	0.0214	-2.48235	-3.2252	-0.386122	ZNF816	zinc finger protein 816
8146637	0.4161	0.0215	-2.48187	-3.226	-0.391293	YTHDF3	YTH N6-methyladenosine RNA binding protein 3
8081135	0.4161	0.0215	-2.48182	-3.2261	-0.227789	CDV3	CDV3 homolog
8039025	0.4161	0.0215	-2.48132	-3.227	-0.188255	ZNF702P	zinc finger protein 702, pseudogene
8136315	0.4161	0.0215	2.48096	-3.2276	0.327342	LRGUK	leucine rich repeats and guanylate kinase domain containing
8165945	0.4161	0.0215	2.48002	-3.2293	0.482998	CLDN34	claudin 34
7999120	0.4161	0.0216	2.47912	-3.2308	0.361206	CORO7	coronin 7
8056977	0.4161	0.0216	-2.47814	-3.2326	-0.343764	NFE2L2	nuclear factor, erythroid 2 like 2
7921360	0.4161	0.0216	2.47789	-3.233	0.35958	OR6Y1	olfactory receptor family 6 subfamily Y member 1
7898739	0.4161	0.0216	-2.47874	-3.2315	-0.253491	CDC42	protein-L-isoaspartate (D-aspartate) O-methyltransferase domain containing 1
7942300	0.4161	0.0217	2.47759	-3.2335	0.32049	IL18BP	interleukin 18 binding protein
8021154	0.4161	0.0217	2.47759	-3.2335	0.322379	CTIF	cap binding complex dependent translation initiation factor
7946559	0.4161	0.0217	-2.4772	-3.2342	-0.380113	DNAJC25-GNG10///GNG10	DNAJC25-GNG10 readthrough///G protein subunit gamma 10
8037962	0.4162	0.0217	2.47575	-3.2367	0.231447	CABP5	calcium binding protein 5
7998072	0.417	0.0219	2.47268	-3.2421	0.285055	DEF8	differentially expressed in FDCP 8 homolog
8134907	0.4171	0.0219	2.47237	-3.2427	0.499043	EPO	erythropoietin
8077226	0.4168	0.0219	2.47327	-3.2411	0.223515	ING5	cyclin L2
7994463	0.418	0.022	2.47096	-3.2451	0.260753	ATP2A1	ATPase sarcoplasmic/endoplasmic reticulum Ca2+ transporting 1
8133690	0.418	0.022	-2.47058	-3.2458	-0.243932	MDH2	malate dehydrogenase 2
8044491	0.418	0.022	2.47017	-3.2465	0.267604	CHCHD5	coiled-coil-helix-coiled-coil-helix domain containing 5
8138401	0.418	0.022	-2.4701	-3.2466	-0.352036	SNX13	sorting nexin 13
8071206	0.418	0.022	-2.47004	-3.2468	-0.311196	MRPL40	mitochondrial ribosomal protein L40
8096463	0.4181	0.0221	-2.46933	-3.248	-0.454153	SMARCAD1	SWI/SNF-related, matrix-associated actin-dependent regulator of chromatin, subfamily a, containing DEAD/H box 1
8178790	0.4181	0.0221	2.46889	-3.2488	0.459922	GPSM3	G-protein signaling modulator 3
8161747	0.4181	0.0221	-2.46825	-3.2499	-0.839819	ZFAND5	zinc finger AN1-type containing 5
8150870	0.4181	0.0222	-2.46627	-3.2534	-0.404317	PSMC6	ArfGAP with GTPase domain, ankyrin repeat and PH domain 5///ArfGAP with GTPase domain, ankyrin repeat and PH domain 12, pseudogene///ArfGAP with GTPase domain, ankyrin repeat and PH domain 6///ArfGAP with GTPase domain, ankyrin repeat and PH domain 4
7904050	0.4181	0.0222	2.46677	-3.2525	0.262475	MOV10	Mov10 RISC complex RNA helicase
8069156	0.4181	0.0222	2.46629	-3.2533	0.432896	KRTAP10-11	keratin associated protein 10-11
8098500	0.4181	0.0223	-2.46494	-3.2557	-0.313202	CDKN2AIP	CDKN2A interacting protein
8157802	0.4181	0.0223	2.46478	-3.256	0.621957	MIR181B2	microRNA 181b-2
8052747	0.4181	0.0223	-2.46427	-3.2568	-0.367088	BMP10	bone morphogenetic protein 10
7931840	0.4181	0.0223	2.46424	-3.2569	0.934663	AKR1C8P	aldo-keto reductase family 1 member C8, pseudogene
7910494	0.4181	0.0223	-2.46408	-3.2572	-0.366983	ARV1	ARV1 homolog, fatty acid homeostasis modulator
7931561	0.4181	0.0223	2.46375	-3.2578	0.325854	ZNF511	zinc finger protein 511
7932495	0.4181	0.0223	2.46346	-3.2583	0.299502	CASC10	cancer susceptibility candidate 10
8174779	0.4181	0.0223	-2.46345	-3.2583	-0.37573	LAMP2	lysosomal associated membrane protein 2
8180394	0.4181	0.0224	-2.46301	-3.2591	-0.330306	POLR2M	uncharacterized LOC642980
8105801	0.4181	0.0224	-2.46291	-3.2592	-0.341665	SLC30A5	solute carrier family 30 member 5
8140280	0.4181	0.0224	2.46272	-3.2596	0.376922	DTX2P1-UPK3BP1-PMS2P11///LOC441259///PMS2P5///PMS2P2	DTX2P1-UPK3BP1-PMS2P11 readthrough, transcribed pseudogene///PMS1 homolog 2, mismatch repair system component pseudogene///PMS1 homolog 2, mismatch repair system component pseudogene 5///PMS1 homolog 2, mismatch repair system component pseudogene 2
8041967	0.4181	0.0224	-2.4627	-3.2596	-0.337553	ERLEC1	endoplasmic reticulum lectin 1
8020129	0.4181	0.0224	-2.46269	-3.2596	-0.316935	VAPA	VAMP associated protein A
7979698	0.4181	0.0224	-2.46255	-3.2599	-0.398209	ATP6V1D	ATPase H+ transporting V1 subunit D
7931081	0.4182	0.0224	-2.46206	-3.2607	-0.319859	PLEKHA1	pleckstrin homology domain containing A1
7965040	0.4182	0.0224	-2.46198	-3.2609	-0.924407	PHLDA1	pleckstrin homology like domain family A member 1
8081298	0.4184	0.0225	-2.46087	-3.2628	-0.424784	ADGRG7	adhesion G protein-coupled receptor G7
8082667	0.4184	0.0225	-2.46045	-3.2635	-0.305957	NUDT16	nudix hydrolase 16
7942717	0.4184	0.0225	2.4604	-3.2636	0.342831	MYO7A	myosin VIIA
8105852	0.4185	0.0225	-2.45972	-3.2648	-0.325389	MRPS36	mitochondrial ribosomal protein S36
7956743	0.4185	0.0225	-2.45917	-3.2658	-0.231487	RPL14	ribosomal protein L14
7974229	0.4185	0.0226	-2.45881	-3.2664	-0.29246	KLHDC2	kelch domain containing 2
7991762	0.4185	0.0226	2.45827	-3.2673	1.11196	HBA2///HBA1	hemoglobin subunit alpha 2///hemoglobin subunit alpha 1
8149885	0.4189	0.0226	2.45752	-3.2686	0.436057	ADRA1A	adrenoceptor alpha 1A
8179704	0.4192	0.0227	-2.45616	-3.271	-0.78886	IER3	protein S (alpha)
7931216	0.4192	0.0227	-2.45674	-3.27	-0.248031	FAM175B	family with sequence similarity 175 member B
8001185	0.4192	0.0227	-2.45513	-3.2728	-0.428757	DNAJA2	DnaJ heat shock protein family (Hsp40) member A2
7927972	0.4195	0.0228	-2.45382	-3.2751	-0.462366	VPS26A	VPS26, retromer complex component A
8003560	0.4195	0.0228	-2.45376	-3.2752	-0.372509	DBNDD1	dysbindin domain containing 1
8138289	0.4195	0.0228	-2.4536	-3.2755	-0.378021	ETV1	ETS variant 1
8009443	0.4195	0.0228	2.45346	-3.2757	0.210722	ARSG	arylsulfatase G
8114152	0.4195	0.0229	-2.45164	-3.2789	-0.334742	SKP1	inositol monophosphatase domain containing 1
7976443	0.4195	0.0229	2.45161	-3.279	0.660718	IFI27	interferon alpha inducible protein 27
8006123	0.4195	0.0229	-2.45115	-3.2798	-0.461135	CPD	carboxypeptidase D
7974793	0.4195	0.0229	-2.45102	-3.28	-0.267632	SIX6	SIX homeobox 6
8032480	0.4195	0.023	2.4506	-3.2807	0.248178	LSM7	LSM7 homolog, U6 small nuclear RNA and mRNA degradation associated
8163509	0.4195	0.023	2.45037	-3.2811	0.259454	ALAD	aminolevulinate dehydratase
7977511	0.4195	0.023	2.44945	-3.2827	0.245355	TEP1	telomerase associated protein 1
8118655	0.4195	0.023	2.44881	-3.2839	0.288515	B3GALT4	beta-1,3-galactosyltransferase 4
8133300	0.4195	0.0231	2.44822	-3.2849	0.415792	PMS2P6///LOC441259///PMS2P3///PMS2P2///PMS2P1///PMS2P6///PMS2P3///PMS2P2///PMS2P1	PMS1 homolog 2, mismatch repair system component pseudogene 6///PMS1 homolog 2, mismatch repair system component pseudogene///PMS1 homolog 2, mismatch repair system component pseudogene 3///PMS1 homolog 2, mismatch repair system component pseudogene 2///PMS1 homolog 2, mismatch repair system component pseudogene 1///PMS1 homolog 2, mismatch repair system component pseudogene 6///PMS1 homolog 2, m…
7911754	0.4195	0.0231	2.44767	-3.2858	0.402923	TNFRSF14	TNF receptor superfamily member 14
8023401	0.4195	0.0231	-2.44746	-3.2862	-0.631872	CCDC68	coiled-coil domain containing 68
8104825	0.4195	0.0231	-2.44738	-3.2864	-0.347926	BRIX1///RAD1	BRX1, biogenesis of ribosomes///RAD1 checkpoint DNA exonuclease
8102655	0.4195	0.0231	-2.44735	-3.2864	-0.327155	BBS7	Bardet-Biedl syndrome 7
8006433	0.4195	0.0231	-2.44714	-3.2868	-0.763826	CCL2	C-C motif chemokine ligand 2
8056763	0.4195	0.0231	-2.44686	-3.2873	-0.413618	RPS15	ribosomal protein S15
8073430	0.4195	0.0231	-2.44685	-3.2873	-0.262608	ACO2	aconitase 2
8121510	0.4197	0.0232	-2.44615	-3.2885	-0.448457	RPF2	ribosomal protein S3A
7966690	0.4197	0.0232	2.44561	-3.2894	0.344338	TBX3	T-box 3
7932453	0.4202	0.0233	2.44425	-3.2918	0.453783	NEBL	nebulette
7907572	0.4202	0.0233	-2.44398	-3.2923	-0.850143	PAPPA2	pappalysin 2
7979196	0.4202	0.0233	-2.44351	-3.2931	-0.329912	GNPNAT1	glucosamine-phosphate N-acetyltransferase 1
7948293	0.4202	0.0234	2.44248	-3.2949	0.233977	MED19	mediator complex subunit 19
7993404	0.4202	0.0234	2.4424	-3.295	0.531495	PKD1P6-NPIPP1///PKD1P1///PKD1P2///NPIPA1///PKD1	PKD1P6-NPIPP1 readthrough///polycystin 1, transient receptor potential channel interacting pseudogene 1///polycystin 1, transient receptor potential channel interacting pseudogene 2///nuclear pore complex interacting protein family member A1///polycystin 1, transient receptor potential channel interacting
8167099	0.4202	0.0234	2.44234	-3.2951	0.420026	INE1	inactivation escape 1 (non-protein coding)
7974316	0.4202	0.0234	-2.44201	-3.2957	-0.322817	FRMD6	FERM domain containing 6
8073875	0.4202	0.0234	2.4418	-3.2961	0.235201	TRMU	tRNA 5-methylaminomethyl-2-thiouridylate methyltransferase
8169750	0.4202	0.0234	-2.44179	-3.2961	-0.429303	STAG2	stromal antigen 2
7982358	0.4202	0.0234	-2.44162	-3.2964	-0.458988	ARHGAP11A	Rho GTPase activating protein 11A
8001658	0.4202	0.0234	-2.44147	-3.2966	-0.366883	CFAP20	cilia and flagella associated protein 20
8177222	0.4202	0.0234	-2.4414	-3.2968	-0.704855	CD24	CD24 molecule
8098604	0.4202	0.0234	-2.44137	-3.2968	-0.845581	ANKRD37///UFSP2	ankyrin repeat domain 37///UFM1 specific peptidase 2
8114491	0.4206	0.0235	2.44067	-3.298	0.385379	SLC23A1	solute carrier family 23 member 1
8121916	0.4206	0.0235	-2.44038	-3.2986	-0.432499	RSPO3	R-spondin 3
7909601	0.4214	0.0235	2.43921	-3.3006	0.697642	SNORA16B	small nucleolar RNA, H/ACA box 16B
8011222	0.4216	0.0236	2.43876	-3.3014	0.247196	SMG6	SMG6, nonsense mediated mRNA decay factor
8013319	0.4216	0.0236	2.43781	-3.303	0.466569	GRAP	GRB2-related adaptor protein
8007118	0.4216	0.0236	2.43709	-3.3043	0.419058	KRTAP9-1	keratin associated protein 9-1
7978066	0.4218	0.0237	2.43627	-3.3057	0.336836	AP1G2	adaptor related protein complex 1 gamma 2 subunit
8174134	0.4218	0.0237	-2.43571	-3.3067	-0.385817	TCEAL6///TCEAL3	transcription elongation factor A like 6///transcription elongation factor A like 3
8153835	0.4218	0.0237	2.43564	-3.3068	0.388669	PPP1R16A	protein phosphatase 1 regulatory subunit 16A
8078898	0.4218	0.0237	2.4356	-3.3069	0.222564	SLC25A38	solute carrier family 25 member 38
8147307	0.4225	0.0238	-2.43438	-3.309	-0.335215	FAM92A1	family with sequence similarity 92 member A1
8042346	0.4225	0.0238	2.43407	-3.3095	0.392698	LOC440867	uncharacterized LOC440867
8053648	0.4225	0.0238	-2.43355	-3.3104	-0.366787	KRCC1	lysine rich coiled-coil 1
8041826	0.4225	0.0238	2.43316	-3.3111	0.379904	TTC7A	tetratricopeptide repeat domain 7A
8104680	0.4225	0.0238	-2.43306	-3.3113	-0.267421	C5orf22	chromosome 5 open reading frame 22
7925728	0.4231	0.0239	2.43164	-3.3138	0.357302	OR6F1	olfactory receptor family 6 subfamily F member 1
8152553	0.4231	0.0239	-2.43151	-3.314	-0.319302	TAF2	TATA-box binding protein associated factor 2
7962194	0.4231	0.024	-2.43086	-3.3151	-0.281917	H3F3C	H3 histone, family 3C
8039054	0.4231	0.024	-2.42982	-3.3169	-0.394119	ZNF347	zinc finger protein 347
8146427	0.4231	0.0241	-2.4283	-3.3196	-0.437168	PCMTD1	ArfGAP with GTPase domain, ankyrin repeat and PH domain 5///ArfGAP with GTPase domain, ankyrin repeat and PH domain 12, pseudogene///ArfGAP with GTPase domain, ankyrin repeat and PH domain 6///ArfGAP with GTPase domain, ankyrin repeat and PH domain 4
8035829	0.4231	0.0241	-2.42891	-3.3185	-0.277946	RPL34	ribosomal protein L34
8159004	0.4231	0.0241	-2.4288	-3.3187	-0.877721	SNORD24///RPL7A	small nucleolar RNA, C/D box 24///ribosomal protein L7a
7974387	0.4231	0.0241	-2.42852	-3.3192	-0.323872	STYX	serine/threonine/tyrosine interacting protein
8140258	0.4231	0.0241	2.42839	-3.3194	0.408707	PMS2P6///LOC441259///PMS2P5///PMS2P1	PMS1 homolog 2, mismatch repair system component pseudogene 6///PMS1 homolog 2, mismatch repair system component pseudogene///PMS1 homolog 2, mismatch repair system component pseudogene 5///PMS1 homolog 2, mismatch repair system component pseudogene 1
8089596	0.4231	0.0241	2.4282	-3.3197	0.654491	CFAP44	cilia and flagella associated protein 44
8018439	0.4231	0.0241	-2.4272	-3.3215	-0.20314	H3F3B	H3 histone, family 3B
8089015	0.4231	0.0242	-2.42594	-3.3237	-0.251332	PROS1	olfactory receptor family 2 subfamily T member 33///olfactory receptor family 2 subfamily T member 8///olfactory receptor family 2 subfamily T member 12
8018620	0.4231	0.0242	2.42708	-3.3217	0.191027	EXOC7	exocyst complex component 7
7917728	0.4231	0.0242	-2.42586	-3.3238	-0.38473	FAM69A	family with sequence similarity 69 member A
8134470	0.4231	0.0242	2.42573	-3.324	0.232725	TRRAP	transformation/transcription domain associated protein
7923889	0.4231	0.0242	2.42542	-3.3245	0.167949	EIF2D	eukaryotic translation initiation factor 2D
8001587	0.4231	0.0242	2.42539	-3.3246	0.346576	KIFC3	kinesin family member C3
7985418	0.4231	0.0242	2.42539	-3.3246	0.229565	LOC440300///DNM1P41///GOLGA2P10	chondroitin sulfate proteoglycan 4 pseudogene///dynamin 1 pseudogene 41///golgin A2 pseudogene 10
8120061	0.4231	0.0242	-2.42535	-3.3247	-0.314082	ENPP4	ectonucleotide pyrophosphatase/phosphodiesterase 4 (putative)
8058415	0.4231	0.0243	2.42501	-3.3253	0.358896	INO80D	INO80 complex subunit D
7908499	0.4234	0.0243	-2.42412	-3.3268	-0.466043	CFHR5	complement factor H related 5
8072876	0.4234	0.0243	2.42402	-3.327	0.360272	LGALS1	galectin 1
8120151	0.4234	0.0243	2.4235	-3.3279	0.267528	OPN5	opsin 5
8141127	0.4234	0.0243	-2.42328	-3.3283	-0.421125	C7orf76	chromosome 7 open reading frame 76
7917088	0.4234	0.0244	-2.42318	-3.3284	-0.433664	PIGK	phosphatidylinositol glycan anchor biosynthesis class K
8159036	0.4236	0.0244	2.42274	-3.3292	0.382062	ADAMTS13	ADAM metallopeptidase with thrombospondin type 1 motif 13
8014574	0.4237	0.0244	-2.42215	-3.3302	-0.359756	DDX52	DEAD-box helicase 52
8072346	0.4237	0.0244	2.42197	-3.3305	0.34691	MTFP1	mitochondrial fission process 1
8154733	0.4237	0.0244	-2.42179	-3.3309	-0.227271	ACO1	aconitase 1
8084035	0.4237	0.0244	-2.42149	-3.3314	-0.347814	ZNF639	zinc finger protein 639
8064739	0.4237	0.0245	2.42101	-3.3322	0.308953	C20orf27	chromosome 20 open reading frame 27
7925480	0.4237	0.0245	-2.42092	-3.3324	-0.255856	FH	fumarate hydratase
8158839	0.4241	0.0245	2.42006	-3.3339	0.250072	PRRC2B	proline rich coiled-coil 2B
8160622	0.4241	0.0245	-2.41983	-3.3342	-0.297603	SMU1	DNA replication regulator and spliceosomal factor
8145660	0.4251	0.0247	-2.41633	-3.3403	-0.333089	DCTN6	dynactin subunit 6
7937305	0.4251	0.0247	2.41626	-3.3404	0.482352	NLRP6	NLR family pyrin domain containing 6
7959927	0.4251	0.0247	2.41601	-3.3409	0.271222	SFSWAP	splicing factor SWAP homolog
7982309	0.4251	0.0248	2.41542	-3.3419	0.326869	MTMR10///FAN1	myotubularin related protein 10///FANCD2/FANCI-associated nuclease 1
7984641	0.4251	0.0248	-2.41525	-3.3422	-0.281628	ARIH1	ariadne RBR E3 ubiquitin protein ligase 1
8008825	0.4251	0.0248	-2.41484	-3.3429	-0.241293	DHX40	DEAH-box helicase 40
7910915	0.4251	0.0248	2.41445	-3.3436	0.7264	CHRM3	cholinergic receptor muscarinic 3
7999718	0.4251	0.0248	-2.41434	-3.3438	-0.360463	FOPNL	FGFR1OP N-terminal like
8026610	0.4251	0.0248	2.41406	-3.3442	0.257425	SIN3B	SIN3 transcription regulator family member B
7999834	0.4251	0.0248	-2.41405	-3.3443	-0.263321	ARL6IP1	ADP ribosylation factor like GTPase 6 interacting protein 1
8140269	0.4251	0.0248	2.41387	-3.3446	0.388225	PMS2P6///LOC441259///PMS2P5///PMS2P1///PMS2P6///PMS2P3///PMS2P2///PMS2P1	PMS1 homolog 2, mismatch repair system component pseudogene 6///PMS1 homolog 2, mismatch repair system component pseudogene///PMS1 homolog 2, mismatch repair system component pseudogene 5///PMS1 homolog 2, mismatch repair system component pseudogene 1///PMS1 homolog 2, mismatch repair system component pseudogene 6///PMS1 homolog 2, mismatch repair system component pseudogene 3///PMS1 homolog 2, m…
7921713	0.4252	0.0249	-2.41311	-3.3459	-0.213062	TSTD1///F11R	thiosulfate sulfurtransferase like domain containing 1///F11 receptor
8131475	0.4252	0.0249	-2.41304	-3.346	-0.328749	C1GALT1	core 1 synthase, glycoprotein-N-acetylgalactosamine 3-beta-galactosyltransferase 1
8092564	0.4252	0.0249	-2.41283	-3.3464	-0.194402	TRA2B	transformer 2 beta homolog (Drosophila)
8003962	0.4254	0.0249	2.41227	-3.3473	0.324748	PLD2	phospholipase D2
8069880	0.4254	0.0249	2.41189	-3.348	0.30353	TIAM1	T-cell lymphoma invasion and metastasis 1
7965410	0.4265	0.0251	-2.40989	-3.3515	-0.373834	DCN	decorin
7999112	0.427	0.0251	2.40916	-3.3527	0.256139	CORO7-PAM16///PAM16	CORO7-PAM16 readthrough///presequence translocase associated motor 16 homolog
8117054	0.4271	0.0252	-2.40745	-3.3557	-0.525192	CAP2	CAP, adenylate cyclase-associated protein, 2 (yeast)
7955896	0.4272	0.0252	-2.4068	-3.3568	-0.378194	COPZ1	coatomer protein complex subunit zeta 1
8053599	0.4271	0.0252	2.40776	-3.3551	0.272117	WBP1	TGFB induced factor homeobox 1
7905283	0.4273	0.0253	2.40572	-3.3587	0.364536	FAM63A///ANXA9	family with sequence similarity 63 member A///annexin A9
8077490	0.4273	0.0253	-2.40567	-3.3588	-0.514248	LMCD1	LIM and cysteine rich domains 1
7934133	0.4275	0.0253	-2.40493	-3.36	-0.312207	PPA1	pyrophosphatase (inorganic) 1
8056572	0.4275	0.0253	-2.40456	-3.3607	-0.305876	SPC25	SPC25, NDC80 kinetochore complex component
8071044	0.4275	0.0253	2.4045	-3.3608	0.524792	MAFIP	ubiquitin conjugating enzyme E2 D3
8143127	0.4289	0.0255	-2.4025	-3.3642	-0.36754	FAM180A	family with sequence similarity 180 member A
8052562	0.4294	0.0255	-2.40181	-3.3654	-0.252497	CCT4	chaperonin containing TCP1 subunit 4
8019807	0.4294	0.0255	-2.40148	-3.366	-0.281199	USP14	ubiquitin specific peptidase 14
8140151	0.4295	0.0256	-2.39978	-3.3689	-0.295921	RFC2	replication factor C subunit 2
8055672	0.4295	0.0256	-2.39941	-3.3696	-0.301342	MMADHC	methylmalonic aciduria and homocystinuria, cblD type
8180111	0.4295	0.0256	2.39946	-3.3695	0.267656	RXRB	mitogen-activated protein kinase 8 interacting protein 1 pseudogene///mitogen-activated protein kinase 8 interacting protein 1
8110068	0.4295	0.0257	2.39888	-3.3705	0.187464	C5orf47	chromosome 5 open reading frame 47
7949273	0.4295	0.0257	2.39837	-3.3714	1.01971	MIR192	microRNA 192
8167430	0.4295	0.0257	2.39831	-3.3715	0.30069	CCDC120	coiled-coil domain containing 120
7975268	0.4295	0.0257	-2.3983	-3.3715	-0.562603	VTI1B///ARG2	vesicle transport through interaction with t-SNAREs 1B///arginase 2
7979416	0.4297	0.0257	-2.39786	-3.3722	-0.372827	TOMM20L///TIMM9	translocase of outer mitochondrial membrane 20 like///translocase of inner mitochondrial membrane 9
8076937	0.4298	0.0257	2.39748	-3.3729	0.426607	HDAC10	histone deacetylase 10
8063697	0.4298	0.0257	-2.3973	-3.3732	-0.256641	NELFCD	negative elongation factor complex member C/D
8170428	0.4299	0.0258	-2.39697	-3.3738	-0.263911	MTM1	myotubularin 1
7971563	0.4301	0.0258	-2.39656	-3.3745	-0.233086	PCNP	PEST proteolytic signal containing nuclear protein
7911241	0.4304	0.0258	2.39599	-3.3755	0.64969	OR2L8	olfactory receptor family 2 subfamily L member 8 (gene/pseudogene)
7926609	0.4305	0.0258	-2.39565	-3.376	-0.341676	BMI1	BMI1 proto-oncogene, polycomb ring finger
8037794	0.4308	0.0259	2.39508	-3.377	0.268905	PRKD2	protein kinase D2
7938544	0.4308	0.0259	-2.39387	-3.3791	-0.308967	TEAD1	TEA domain transcription factor 1
8013602	0.4308	0.0259	2.3938	-3.3793	0.338109	SEBOX	SEBOX homeobox
7958620	0.4308	0.026	-2.39275	-3.381	-0.440107	IFT81	intraflagellar transport 81
8022380	0.4308	0.026	-2.39264	-3.3813	-0.300827	CEP76	centrosomal protein 76
8000716	0.4308	0.026	-2.39255	-3.3814	-0.301296	SEZ6L2	seizure related 6 homolog like 2
8085797	0.4308	0.026	2.39252	-3.3814	0.2477	THRB	thyroid hormone receptor beta
8128429	0.4308	0.026	-2.39205	-3.3823	-0.386474	CCNC	cyclin C
7943749	0.4308	0.026	-2.39191	-3.3825	-0.234118	LAYN	layilin
8138958	0.4308	0.0261	2.39148	-3.3832	0.199495	NPSR1-AS1	NPSR1 antisense RNA 1
8082911	0.4308	0.0261	-2.39143	-3.3833	-0.336868	NCK1	NCK adaptor protein 1
7981742	0.4308	0.0261	2.39138	-3.3834	0.273444	IGHV5-78	immunoglobulin heavy variable 5-78 (pseudogene)
7951633	0.4308	0.0261	-2.39128	-3.3836	-0.233248	ALG9	ALG9, alpha-1,2-mannosyltransferase
7992568	0.431	0.0261	2.39084	-3.3843	0.281845	E4F1	E4F transcription factor 1
8045368	0.4311	0.0261	-2.39048	-3.385	-0.270362	ACMSD	aminocarboxymuconate semialdehyde decarboxylase
7975676	0.4318	0.0262	-2.38823	-3.3888	-0.260894	BBOF1///ALDH6A1	RNA polymerase II subunit M
8003733	0.4317	0.0262	2.38945	-3.3867	0.323561	SGSM2	small G protein signaling modulator 2
8021152	0.4318	0.0263	2.38704	-3.3909	0.170131	C18orf12	chromosome 18 open reading frame 12
8144866	0.4318	0.0263	-2.38689	-3.3911	-0.413063	NAT2	N-acetyltransferase 2
8133754	0.4318	0.0263	2.38685	-3.3912	0.349863	PMS2P9///DTX2P1-UPK3BP1-PMS2P11///LOC441259///DTX2///PMS2P5	PMS1 homolog 2, mismatch repair system component pseudogene 9///DTX2P1-UPK3BP1-PMS2P11 readthrough, transcribed pseudogene///PMS1 homolog 2, mismatch repair system component pseudogene///deltex E3 ubiquitin ligase 2///PMS1 homolog 2, mismatch repair system component pseudogene 5
8163930	0.4318	0.0263	-2.38669	-3.3915	-0.320497	NDUFA8	NADH:ubiquinone oxidoreductase subunit A8
8036324	0.4318	0.0263	-2.38648	-3.3919	-0.514857	ZNF260	zinc finger protein 260
8138776	0.4318	0.0263	-2.38647	-3.3919	-0.239317	HIBADH	3-hydroxyisobutyrate dehydrogenase
8120860	0.4318	0.0263	-2.38636	-3.3921	-0.283999	BCKDHB	branched chain keto acid dehydrogenase E1 subunit beta
7955441	0.4318	0.0263	-2.38634	-3.3921	-0.329664	METTL7A	methyltransferase like 7A
7946446	0.4323	0.0264	-2.38556	-3.3934	-0.232771	NRIP3	nuclear receptor interacting protein 3
7985587	0.4323	0.0264	2.38528	-3.3939	0.365688	SCAND2P	SCAN domain containing 2 pseudogene
7959298	0.4323	0.0264	2.38476	-3.3948	0.35444	TMEM120B///RHOF	transmembrane protein 120B///ras homolog family member F, filopodia associated
7945503	0.4323	0.0265	2.38442	-3.3954	0.249983	DEAF1	DEAF1, transcription factor
7966202	0.4323	0.0265	-2.38432	-3.3956	-0.26353	KCTD10	potassium channel tetramerization domain containing 10
8041257	0.4323	0.0265	-2.38391	-3.3963	-0.335037	SLC30A6	solute carrier family 30 member 6
8014702	0.4326	0.0265	2.38297	-3.3979	0.296615	LOC100129395///MLLT6	NS5ATP13TP1///MLLT6, PHD finger domain containing
7951865	0.4323	0.0265	2.38408	-3.396	0.191977	APOA1	TBC1 domain family member 3I///TBC1 domain family member 3H///TBC1 domain family member 3///TBC1 domain family member 3C///TBC1 domain family member 3B///TBC1 domain family member 3F
8100393	0.4326	0.0266	2.38257	-3.3986	0.447877	KDR	kinase insert domain receptor
8166382	0.4326	0.0266	-2.3817	-3.4001	-0.248236	MBTPS2	membrane bound transcription factor peptidase, site 2
8103524	0.4326	0.0266	-2.38167	-3.4001	-0.236486	TMEM192	transmembrane protein 192
7991313	0.4326	0.0266	2.38162	-3.4002	0.689413	PLIN1	perilipin 1
7925033	0.4326	0.0266	2.38152	-3.4004	0.342578	C1orf131	chromosome 1 open reading frame 131
8039937	0.4326	0.0266	2.38138	-3.4006	0.302381	CPTP	ceramide-1-phosphate transfer protein
8014841	0.4326	0.0266	-2.3813	-3.4008	-0.242738	MED1	mediator complex subunit 1
8013906	0.4326	0.0267	-2.38037	-3.4024	-0.360465	TWF1	ubiquitin conjugating enzyme E2 E4 pseudogene///ubiquitin conjugating enzyme E2 E3
8101916	0.4326	0.0267	-2.38067	-3.4018	-0.425979	TRMT10A	tRNA methyltransferase 10A
7985560	0.4326	0.0267	2.37974	-3.4034	0.491821	CSPG4P5///CSPG4	keratin associated protein 4-7///keratin associated protein 4-9///keratin associated protein 4-8///keratin associated protein 4-11
7908543	0.4326	0.0268	-2.37907	-3.4046	-0.335734	NEK7	NIMA related kinase 7
8083704	0.4329	0.0268	-2.37819	-3.4061	-0.267329	BRD7	bromodomain containing 7
7918437	0.4332	0.0268	-2.37763	-3.4071	-0.265835	LAMTOR5	late endosomal/lysosomal adaptor, MAPK and MTOR activator 5
8118028	0.4326	0.0268	2.37901	-3.4047	0.25968	VARS2	ubiquitin conjugating enzyme E2 D3
7983890	0.4333	0.0269	2.3773	-3.4076	0.243703	MYZAP///GCOM1///POLR2M	myocardial zonula adherens protein///GRINL1A complex locus 1///RNA polymerase II subunit M
7929674	0.4334	0.0269	2.37654	-3.4089	0.628581	C10orf62	chromosome 10 open reading frame 62
7995033	0.4334	0.0269	2.37636	-3.4093	0.248179	ZNF646	zinc finger protein 646
8015456	0.4334	0.0269	-2.37581	-3.4102	-0.216032	KLHL11	kelch like family member 11
7937915	0.4334	0.027	-2.37467	-3.4122	-0.307549	RRM1	ribonucleotide reductase catalytic subunit M1
8036389	0.4334	0.027	-2.37448	-3.4125	-0.364173	ZNF585B	zinc finger protein 585B
7963721	0.4334	0.027	2.37405	-3.4132	0.24869	CALCOCO1	calcium binding and coiled-coil domain 1
7983512	0.4334	0.027	-2.37401	-3.4133	-0.238173	SQRDL	sulfide quinone reductase-like (yeast)
7937508	0.4334	0.0271	2.37394	-3.4134	0.453968	CD151	CD151 molecule (Raph blood group)
8118682	0.4334	0.0271	2.37302	-3.415	0.339162	PHF1	PHD finger protein 1
7957186	0.4334	0.0271	-2.37267	-3.4156	-0.375032	TBC1D15	TBC1 domain family member 15
8151281	0.4334	0.0271	-2.37247	-3.4159	-0.261448	TRAM1	translocation associated membrane protein 1
8048026	0.4334	0.0272	-2.37208	-3.4166	-0.222356	CPS1	carbamoyl-phosphate synthase 1
8131263	0.4334	0.0272	2.37201	-3.4167	0.745565	SNORD13P2	small nucleolar RNA, C/D box 13 pseudogene 2
8124166	0.4334	0.0272	-2.37196	-3.4168	-0.49094	MBOAT1	membrane bound O-acyltransferase domain containing 1
8024829	0.4334	0.0272	2.37181	-3.4171	0.327914	MPND	MPN domain containing
8053366	0.4338	0.0272	-2.37116	-3.4182	-0.276854	SUCLG1	succinate-CoA ligase alpha subunit
8039013	0.4347	0.0273	-2.36949	-3.421	-0.311316	ZNF321P	zinc finger protein 321, pseudogene
7957161	0.4347	0.0273	-2.36897	-3.4219	-0.368376	THAP2	THAP domain containing 2
8085431	0.4347	0.0274	2.36853	-3.4227	0.377838	NUP210	nucleoporin 210
7935251	0.4347	0.0274	-2.36772	-3.4241	-0.210341	TCTN3	tectonic family member 3
7909400	0.4347	0.0274	-2.36741	-3.4246	-0.19966	CD46	CD46 molecule
8036923	0.4347	0.0274	2.36736	-3.4247	0.24989	NUMBL	NUMB like, endocytic adaptor protein
8157691	0.4351	0.0275	-2.36593	-3.4271	-0.453757	SKA2	WAS protein family homolog 1 pseudogene///WAS protein family homolog 1///uncharacterized LOC100134445///WAS protein family homolog 7 pseudogene///WAS protein family homolog 5 pseudogene///WAS protein family homolog 2 pseudogene///WAS protein family homolog 3 pseudogene
7943552	0.4347	0.0275	-2.36705	-3.4252	-0.28938	KBTBD3///AASDHPPT	kelch repeat and BTB domain containing 3///aminoadipate-semialdehyde dehydrogenase-phosphopantetheinyl transferase
8066231	0.4351	0.0276	2.365	-3.4287	0.304802	KIAA1755	KIAA1755
7970831	0.4351	0.0276	-2.36488	-3.4289	-0.294419	UBL3	ubiquitin like 3
7988763	0.4351	0.0276	-2.36438	-3.4298	-0.258864	TNFAIP8L3	TNF alpha induced protein 8 like 3
8145532	0.4351	0.0276	2.36428	-3.43	0.260105	EPHX2	epoxide hydrolase 2
7913978	0.4351	0.0276	2.36413	-3.4302	0.299115	GPN2	GPN-loop GTPase 2
7997257	0.4351	0.0276	-2.3641	-3.4303	-0.372043	ZFP1	ZFP1 zinc finger protein
8088535	0.4351	0.0276	-2.3639	-3.4306	-0.273649	PSMD6	proteasome 26S subunit, non-ATPase 6
7981994	0.4351	0.0277	-2.36346	-3.4314	-0.718233	SNORD116-23	small nucleolar RNA, C/D box 116-23
8113286	0.4351	0.0277	-2.36322	-3.4318	-0.362059	RIOK2	RIO kinase 2
7948957	0.4351	0.0277	2.363	-3.4322	0.667921	SLC22A25	solute carrier family 22 member 25
7911351	0.4357	0.0277	2.36212	-3.4337	0.291544	ZNF596///LINC00115	zinc finger protein 596///long intergenic non-protein coding RNA 115
8083569	0.4357	0.0278	-2.36191	-3.434	-0.595327	TIPARP	TCDD inducible poly(ADP-ribose) polymerase
8035581	0.4365	0.0279	2.36002	-3.4373	0.491223	SUGP2	SURP and G-patch domain containing 2
7922162	0.4365	0.0279	-2.35997	-3.4373	-0.520326	SLC19A2	solute carrier family 19 member 2
8086908	0.4365	0.0279	2.35927	-3.4385	0.299753	PLXNB1	plexin B1
8041383	0.4365	0.0279	2.35917	-3.4387	0.348201	LTBP1	latent transforming growth factor beta binding protein 1
7973156	0.4365	0.0279	2.35916	-3.4387	0.240742	RNASE8	ribonuclease A family member 8
8084929	0.4365	0.0279	-2.35864	-3.4396	-0.66067	SLC51A	solute carrier family 51 alpha subunit
8025551	0.4367	0.028	2.35698	-3.4425	0.354809	ANGPTL6///C19orf66	angiopoietin like 6///chromosome 19 open reading frame 66
7922095	0.4367	0.0281	-2.35652	-3.4432	-0.217019	MPC2	mitochondrial pyruvate carrier 2
8073705	0.4367	0.0281	2.35641	-3.4434	0.239108	PRR5-ARHGAP8///PRR5///ARHGAP8	PRR5-ARHGAP8 readthrough///proline rich 5///Rho GTPase activating protein 8
8014487	0.4367	0.0281	2.35638	-3.4435	0.415937	ACACA	acetyl-CoA carboxylase alpha
8054762	0.4367	0.0281	-2.35654	-3.4432	-0.193768	RPL23AP82///RPL23AP7	WW domain binding protein 1
8074632	0.4376	0.0282	2.35517	-3.4456	0.22928	KLHL22	kelch like family member 22
8133531	0.4377	0.0282	2.35441	-3.4469	0.383852	PMS2P9///DTX2P1-UPK3BP1-PMS2P11///LOC441259///PMS2P5///PMS2P2///PMS2P1	PMS1 homolog 2, mismatch repair system component pseudogene 9///DTX2P1-UPK3BP1-PMS2P11 readthrough, transcribed pseudogene///PMS1 homolog 2, mismatch repair system component pseudogene///PMS1 homolog 2, mismatch repair system component pseudogene 5///PMS1 homolog 2, mismatch repair system component pseudogene 2///PMS1 homolog 2, mismatch repair system component pseudogene 1
8107421	0.4384	0.0283	-2.35315	-3.449	-0.378489	AP3S1	adaptor related protein complex 3 sigma 1 subunit
7947481	0.4384	0.0283	2.35272	-3.4497	0.328315	ELF5	E74 like ETS transcription factor 5
7960559	0.4384	0.0283	2.35247	-3.4502	0.346482	IFFO1	intermediate filament family orphan 1
8007414	0.4384	0.0283	2.35206	-3.4509	0.284387	AOC2	amine oxidase, copper containing 2
8109254	0.4384	0.0284	2.35111	-3.4525	0.205886	TCOF1	treacle ribosome biogenesis factor 1
8117580	0.4384	0.0284	-2.35056	-3.4534	-0.254856	HIST1H2AI	histone cluster 1, H2ai
7989037	0.4384	0.0284	-2.35053	-3.4535	-0.337581	CCPG1	cell cycle progression 1
8103011	0.4384	0.0284	-2.35044	-3.4536	-0.421003	OTUD4	OTU deubiquitinase 4
7999591	0.4384	0.0284	2.35028	-3.4539	0.384684	ABCC6P2///ABCC6P1///ABCC6	ATP binding cassette subfamily C member 6 pseudogene 2///ATP binding cassette subfamily C member 6 pseudogene 1///ATP binding cassette subfamily C member 6
8073816	0.4387	0.0285	2.3497	-3.4549	0.424062	MIRLET7BHG	MIRLET7B host gene
8113938	0.4389	0.0285	-2.34921	-3.4557	-0.270036	ACSL6	acyl-CoA synthetase long-chain family member 6
7952988	0.4392	0.0286	2.34851	-3.4569	0.25843	ERC1	ELKS/RAB6-interacting/CAST family member 1
8128650	0.4393	0.0286	-2.34798	-3.4578	-0.242343	SEC63	SEC63 homolog, protein translocation regulator
8158625	0.4398	0.0287	2.3469	-3.4597	0.249414	LOC100129785	uncharacterized LOC100129785
8068062	0.4398	0.0287	-2.34681	-3.4598	-0.317734	USP16	ubiquitin specific peptidase 16
7992460	0.4398	0.0287	-2.34667	-3.4601	-0.408405	NPW	neuropeptide W
8120378	0.4398	0.0287	-2.34601	-3.4612	-0.605499	KIAA1586	KIAA1586
8143070	0.4398	0.0287	2.34589	-3.4614	0.338406	WDR91	WD repeat domain 91
8063209	0.4398	0.0287	2.34574	-3.4617	0.311693	LOC100131496	uncharacterized LOC100131496
8135933	0.4398	0.0287	2.3456	-3.4619	0.228849	FAM71F2	family with sequence similarity 71 member F2
7909142	0.4402	0.0288	-2.34505	-3.4628	-0.357112	NUCKS1	nuclear casein kinase and cyclin dependent kinase substrate 1
8050790	0.4409	0.0288	-2.344	-3.4646	-0.238651	DNAJC27	DnaJ heat shock protein family (Hsp40) member C27
8139264	0.4414	0.0289	2.34279	-3.4667	0.246213	POLR2J3///SPDYE2///POLR2J2///POLR2J4	RNA polymerase II subunit J3///speedy/RINGO cell cycle regulator family member E2///RNA polymerase II subunit J2///RNA polymerase II subunit J4, pseudogene
7925705	0.4414	0.029	2.34128	-3.4692	0.175599	ZNF496///ZNF496	zinc finger protein 496///zinc finger protein 496
8101158	0.4414	0.029	-2.34102	-3.4697	-0.274269	SCARB2	scavenger receptor class B member 2
7914516	0.4414	0.029	2.34087	-3.4699	0.27995	MTMR9LP	myotubularin related protein 9-like, pseudogene
8017346	0.4414	0.029	2.34078	-3.4701	0.401736	TBC1D3I///TBC1D3G///TBC1D3H///TBC1D3///TBC1D3P2///TBC1D3C///TBC1D3B///TBC1D3F	TBC1 domain family member 3I///TBC1 domain family member 3G///TBC1 domain family member 3H///TBC1 domain family member 3///TBC1 domain family member 3 pseudogene 2///TBC1 domain family member 3C///TBC1 domain family member 3B///TBC1 domain family member 3F
7938951	0.4414	0.029	-2.34068	-3.4703	-0.41971	ANO5	anoctamin 5
8180254	0.4414	0.029	2.34064	-3.4703	0.48639	KRTAP5-8	keratin associated protein 5-8
7944952	0.4414	0.029	-2.34063	-3.4704	-0.235626	KRT18P59	keratin 18 pseudogene 59
8024637	0.4414	0.029	2.34047	-3.4706	0.299499	FZR1	fizzy/cell division cycle 20 related 1
8053753	0.4416	0.0291	2.33984	-3.4717	0.384495	LOC442028///TEKT4	uncharacterized LOC442028///tektin 4
8077513	0.4417	0.0291	-2.33931	-3.4726	-0.257111	THUMPD3	THUMP domain containing 3
8097991	0.4419	0.0291	-2.33888	-3.4733	-0.254341	TDO2	tryptophan 2,3-dioxygenase
8092201	0.4419	0.0292	-2.33865	-3.4737	-0.42191	TBL1XR1///TBL1XR1	transducin (beta)-like 1 X-linked receptor 1///transducin (beta)-like 1 X-linked receptor 1
8138834	0.442	0.0292	-2.33815	-3.4746	-0.32956	FKBP14	FK506 binding protein 14
8095535	0.4423	0.0292	-2.33736	-3.4759	-0.273511	ENAM	enamelin
8099670	0.4423	0.0292	2.33715	-3.4763	0.21739	CCDC149	coiled-coil domain containing 149
8114145	0.4423	0.0293	-2.33692	-3.4767	-0.268405	VDAC1	voltage dependent anion channel 1
7979906	0.4423	0.0293	-2.33689	-3.4767	-0.309826	COX16	COX16, cytochrome c oxidase assembly homolog
7925585	0.4424	0.0293	2.33661	-3.4772	0.303429	LOC101928068///EFCAB2	uncharacterized LOC101928068///EF-hand calcium binding domain 2
8053330	0.4424	0.0293	2.33616	-3.478	0.270261	REG1B///REG1A	regenerating family member 1 beta///regenerating family member 1 alpha
8152512	0.4424	0.0293	-2.33585	-3.4785	-0.379007	TNFRSF11B	TNF receptor superfamily member 11b
8030908	0.4424	0.0293	-2.33569	-3.4788	-0.28986	ZNF480	zinc finger protein 480
8034217	0.4424	0.0294	2.33543	-3.4792	0.299851	EPOR	erythropoietin receptor
8139935	0.4424	0.0294	2.33527	-3.4795	0.655822	TYW1B	tRNA-yW synthesizing protein 1 homolog B
7925550	0.4424	0.0294	-2.33512	-3.4797	-0.25614	ADSS	adenylosuccinate synthase
7905968	0.4424	0.0294	-2.33491	-3.4801	-0.209451	MTX1	metaxin 1
8111360	0.4429	0.0294	-2.33415	-3.4814	-0.221141	ZFR	zinc finger RNA binding protein
8059985	0.4434	0.0295	2.33312	-3.4831	0.274046	LOC151174	uncharacterized LOC151174
8078046	0.4434	0.0295	2.33283	-3.4836	0.254941	C3orf20	chromosome 3 open reading frame 20
8044927	0.4434	0.0295	-2.33273	-3.4838	-0.469372	INHBB///INHBB	inhibin beta B subunit///inhibin beta B subunit
7996677	0.4434	0.0295	-2.33233	-3.4845	-0.219172	NUTF2	nuclear transport factor 2
8038624	0.4436	0.0296	2.33174	-3.4855	0.235723	C19orf48	chromosome 19 open reading frame 48
7957386	0.444	0.0296	-2.33102	-3.4867	-0.35022	ACSS3	acyl-CoA synthetase short-chain family member 3
7991214	0.4445	0.0297	2.33028	-3.488	0.581322	DET1	de-etiolated homolog 1 (Arabidopsis)
8149389	0.4451	0.0298	2.32888	-3.4903	0.252695	FAM86B2///FAM86B1	family with sequence similarity 86 member B2///family with sequence similarity 86 member B1
8085263	0.4451	0.0298	-2.32838	-3.4912	-0.24549	EMC3	ER membrane protein complex subunit 3
7989146	0.4451	0.0298	-2.32795	-3.4919	-0.660562	MNS1	meiosis specific nuclear structural 1
8083941	0.4451	0.0298	-2.32789	-3.492	-0.377492	ECT2	epithelial cell transforming 2
7934411	0.4451	0.0298	-2.32779	-3.4922	-0.257207	USP54	ubiquitin specific peptidase 54
7999752	0.4451	0.0298	-2.32757	-3.4926	-0.461935	LYRM2///ZC3H11A	LYR motif containing 2///zinc finger CCCH-type containing 11A
8093104	0.4451	0.0299	2.32675	-3.494	0.468306	TM4SF19	transmembrane 4 L six family member 19
7926061	0.4451	0.0299	-2.32611	-3.4951	-0.180965	ITIH2	inter-alpha-trypsin inhibitor heavy chain 2
8168589	0.4451	0.0299	-2.32608	-3.4951	-0.293011	ZNF711	zinc finger protein 711
7968734	0.4451	0.0299	-2.32605	-3.4952	-0.435258	SLC25A15	solute carrier family 25 member 15
7923837	0.4451	0.03	2.32576	-3.4956	0.349941	PM20D1	peptidase M20 domain containing 1
8046997	0.4451	0.03	-2.32567	-3.4958	-0.255816	ASNSD1	asparagine synthetase domain containing 1
7922414	0.4451	0.03	-2.32545	-3.4962	-0.37831	SNORD76///GAS5	small nucleolar RNA, C/D box 76///growth arrest specific 5 (non-protein coding)
8131944	0.4451	0.03	-2.32536	-3.4963	-0.387635	NFE2L3	nuclear factor, erythroid 2 like 3
7903281	0.4451	0.03	-2.32536	-3.4963	-0.352122	SLC35A3	solute carrier family 35 member A3
7957467	0.4454	0.03	-2.32452	-3.4977	-0.358362	C12orf29///CEP290	chromosome 12 open reading frame 29///centrosomal protein 290
7979849	0.4454	0.03	2.32451	-3.4978	0.203937	DCAF5	DDB1 and CUL4 associated factor 5
7994889	0.4454	0.0301	2.32376	-3.499	0.265398	SRCAP	Snf2-related CREBBP activator protein
8180324	0.4454	0.0301	-2.32295	-3.5004	-0.364209	THAP5	THAP domain containing 5
8140239	0.4454	0.0301	2.32291	-3.5005	0.377382	PMS2P6///LOC441259///PMS2P3///PMS2P5///PMS2P2///PMS2P1///PMS2P6///PMS2P3///PMS2P2///PMS2P1	PMS1 homolog 2, mismatch repair system component pseudogene 6///PMS1 homolog 2, mismatch repair system component pseudogene///PMS1 homolog 2, mismatch repair system component pseudogene 3///PMS1 homolog 2, mismatch repair system component pseudogene 5///PMS1 homolog 2, mismatch repair system component pseudogene 2///PMS1 homolog 2, mismatch repair system component pseudogene 1///PMS1 homolog 2, m…
8156826	0.4454	0.0302	-2.32277	-3.5007	-0.253997	TGFBR1	transforming growth factor beta receptor 1
7982597	0.4454	0.0302	-2.32274	-3.5008	-0.683592	THBS1	thrombospondin 1
8053073	0.4454	0.0302	2.32216	-3.5018	0.211034	SLC4A5	solute carrier family 4 member 5
7988963	0.4454	0.0302	-2.32192	-3.5022	-0.338095	ARPP19	cAMP regulated phosphoprotein 19
8055038	0.4454	0.0302	2.32161	-3.5027	0.289374	LIMS2	LIM zinc finger domain containing 2
7992692	0.4454	0.0302	2.3215	-3.5029	0.473858	SRRM2	serine/arginine repetitive matrix 2
7976863	0.4454	0.0302	-2.3215	-3.5029	-0.224542	PPP2R5C	protein phosphatase 2 regulatory subunit B'gamma
8141829	0.4454	0.0303	2.32048	-3.5046	0.358713	UPK3BL///POLR2J3///POLR2J2///POLR2J4	uroplakin 3B-like///RNA polymerase II subunit J3///RNA polymerase II subunit J2///RNA polymerase II subunit J4, pseudogene
7990528	0.4454	0.0303	-2.31976	-3.5058	-0.22494	SNUPN	snurportin 1
7966938	0.4454	0.0304	2.31885	-3.5074	0.254919	GCN1	GCN1, eIF2 alpha kinase activator homolog
8112139	0.4454	0.0304	-2.31873	-3.5076	-0.3418	IL6ST	interleukin 6 signal transducer
8124391	0.4454	0.0304	-2.3187	-3.5076	-0.341703	HIST1H2AB	histone cluster 1, H2ab
7904254	0.4454	0.0304	-2.31857	-3.5079	-0.216311	ATP1A1	ATPase Na+/K+ transporting subunit alpha 1
8159127	0.4454	0.0305	2.31789	-3.509	0.2601	RXRA	retinoid X receptor alpha
7983843	0.4454	0.0305	-2.31756	-3.5096	-0.211452	TCF12	transcription factor 12
8104201	0.4454	0.0305	2.31756	-3.5096	0.233208	PP7080///EXOC3	uncharacterized LOC25845///exocyst complex component 3
7928937	0.4454	0.0305	-2.31689	-3.5107	-0.321758	MINPP1	multiple inositol-polyphosphate phosphatase 1
8071051	0.4454	0.0306	2.31648	-3.5114	0.503502	LOC100233156///MAFIP	tektin 4 pseudogene///MAFF interacting protein (pseudogene)
7988687	0.4454	0.0306	-2.31637	-3.5116	-0.352633	GABPB1	GA binding protein transcription factor beta subunit 1
8023528	0.4454	0.0306	2.31562	-3.5128	0.736767	ALPK2	alpha kinase 2
8020903	0.4454	0.0306	-2.31539	-3.5132	-0.368505	GALNT1	polypeptide N-acetylgalactosaminyltransferase 1
7949798	0.4454	0.0307	2.31475	-3.5143	0.319839	TMEM134	transmembrane protein 134
7945101	0.4454	0.0307	-2.31474	-3.5143	-0.342804	DCPS	decapping enzyme, scavenger
7987642	0.4454	0.0307	-2.31452	-3.5147	-0.327588	NDUFAF1	NADH:ubiquinone oxidoreductase complex assembly factor 1
7948148	0.4454	0.0307	2.31389	-3.5158	0.489361	OR5M10	olfactory receptor family 5 subfamily M member 10
8035345	0.4454	0.0307	2.31377	-3.516	0.298557	INSL3	insulin like 3
7981978	0.4454	0.0308	-2.31329	-3.5168	-0.461775	SNORD116-15	small nucleolar RNA, C/D box 116-15
7922121	0.4454	0.0308	-2.31253	-3.5181	-0.475895	ANKRD36BP1	ankyrin repeat domain 36B pseudogene 1
8088047	0.4454	0.0308	2.31217	-3.5187	0.370621	MUSTN1	musculoskeletal, embryonic nuclear protein 1
7911085	0.4454	0.0308	-2.31198	-3.519	-0.288946	COX20	COX20, cytochrome c oxidase assembly factor
8130383	0.4454	0.0309	-2.31168	-3.5195	-0.268475	MTRF1L	mitochondrial translational release factor 1 like
8036563	0.4454	0.0309	2.31108	-3.5205	0.863681	CAPN12///ACTN4	calpain 12///actinin alpha 4
7995267	0.4454	0.0309	2.31087	-3.5209	0.277729	TP53TG3B///TP53TG3C///TP53TG3	PKD1P6-NPIPP1 readthrough///nuclear pore complex interacting protein family member B5///polycystin 1, transient receptor potential channel interacting pseudogene 1///pyridoxal dependent decarboxylase domain containing 2, pseudogene///nuclear pore complex interacting protein family member A1
7981990	0.4454	0.031	-2.31012	-3.5222	-0.567791	SNORD116-21	small nucleolar RNA, C/D box 116-21
8132292	0.4454	0.031	-2.3098	-3.5227	-0.377906	SEPT7	septin 7
8104369	0.4454	0.031	-2.30978	-3.5227	-0.331973	SRD5A1	steroid 5 alpha-reductase 1
7928558	0.4454	0.031	2.30967	-3.5229	0.29859	ZMIZ1	zinc finger MIZ-type containing 1
8163086	0.4454	0.031	-2.30952	-3.5232	-0.299126	TMEM245	transmembrane protein 245
7995926	0.4454	0.0311	2.30835	-3.5251	0.359381	NLRC5	NLR family CARD domain containing 5
7918847	0.4454	0.0311	-2.30823	-3.5253	-0.320661	SIKE1	suppressor of IKBKE 1
8010405	0.4454	0.0311	2.30816	-3.5255	0.325783	SLC26A11	solute carrier family 26 member 11
8114628	0.4454	0.0311	-2.3077	-3.5262	-0.28962	HARS	histidyl-tRNA synthetase
8163795	0.4454	0.0311	-2.30768	-3.5263	-0.325617	PSMD5	proteasome 26S subunit, non-ATPase 5
8174105	0.4454	0.0311	2.30767	-3.5263	0.252839	NXF5	nuclear RNA export factor 5
7945657	0.4454	0.0311	2.30757	-3.5265	0.294234	KRTAP5-4	keratin associated protein 5-4
8081997	0.4454	0.0311	2.30745	-3.5267	0.196254	FBXO40	F-box protein 40
8107691	0.4454	0.0312	-2.30709	-3.5273	-0.352879	PHAX	phosphorylated adaptor for RNA export
8002556	0.4454	0.0312	-2.30625	-3.5287	-0.343138	TAT	tyrosine aminotransferase
8023816	0.4454	0.0312	2.30619	-3.5288	0.236383	GTSCR1	Gilles de la Tourette syndrome chromosome region, candidate 1 (non-protein coding)
8122554	0.4454	0.0312	-2.30589	-3.5293	-0.291998	RAB32	RAB32, member RAS oncogene family
8162833	0.4454	0.0313	-2.30532	-3.5303	-0.28567	ERP44	endoplasmic reticulum protein 44
7927649	0.4454	0.0313	-2.3051	-3.5306	-0.280434	CISD1	CDGSH iron sulfur domain 1
8180404	0.4454	0.0313	-2.30499	-3.5308	-0.208044	RPL27A	ribosomal protein L27a
7934870	0.4454	0.0313	-2.30498	-3.5308	-0.320383	ATAD1	ATPase family, AAA domain containing 1
8127629	0.4454	0.0313	-2.30487	-3.531	-0.27597	COX7A2	cytochrome c oxidase subunit 7A2
7917516	0.4454	0.0313	-2.30481	-3.5311	-0.357084	GBP3///GBP1	guanylate binding protein 3///guanylate binding protein 1
8081343	0.4454	0.0313	-2.30468	-3.5313	-0.311503	TRMT10C	tRNA methyltransferase 10C, mitochondrial RNase P subunit
8117667	0.4454	0.0313	2.30451	-3.5316	0.36061	ZSCAN26	zinc finger and SCAN domain containing 26
7981781	0.4454	0.0314	2.30421	-3.5321	0.387834	LOC727924///OR4M2	uncharacterized LOC727924///olfactory receptor family 4 subfamily M member 2
8098856	0.4454	0.0314	2.3042	-3.5321	0.225975	RNF212	ring finger protein 212
8160405	0.4454	0.0314	-2.30399	-3.5325	-0.294512	KLHL9	kelch like family member 9
7936041	0.4454	0.0314	-2.30399	-3.5325	-0.276757	ARL3	ADP ribosylation factor like GTPase 3
7973840	0.4454	0.0314	-2.30395	-3.5326	-0.374593	ARHGAP5	Rho GTPase activating protein 5
8119801	0.4454	0.0314	2.30379	-3.5328	0.309059	ABCC10	ATP binding cassette subfamily C member 10
8065798	0.4454	0.0314	2.30364	-3.5331	0.26544	GGT7	gamma-glutamyltransferase 7
8151816	0.4454	0.0314	-2.30288	-3.5344	-0.474509	GEM	GTP binding protein overexpressed in skeletal muscle
7910416	0.4454	0.0314	-2.30283	-3.5345	-0.219065	URB2	URB2 ribosome biogenesis 2 homolog (S. cerevisiae)
8093539	0.4454	0.0314	2.30277	-3.5346	0.258043	WHSC1	Wolf-Hirschhorn syndrome candidate 1
8086498	0.4454	0.0315	-2.30273	-3.5346	-0.312909	KIAA1143	ArfGAP with GTPase domain, ankyrin repeat and PH domain 5///ArfGAP with GTPase domain, ankyrin repeat and PH domain 9///ArfGAP with GTPase domain, ankyrin repeat and PH domain 12, pseudogene///ArfGAP with GTPase domain, ankyrin repeat and PH domain 4
8097782	0.4454	0.0315	-2.30159	-3.5366	-0.309121	RPS3A	magnesium transporter 1
7909127	0.4454	0.0315	-2.30253	-3.535	-0.229015	MFSD4A	major facilitator superfamily domain containing 4A
7997982	0.4454	0.0315	2.30223	-3.5355	0.205141	CDK10	cyclin dependent kinase 10
7983145	0.4454	0.0315	2.30222	-3.5355	0.325307	STARD9	StAR related lipid transfer domain containing 9
8166402	0.4454	0.0315	-2.30184	-3.5361	-0.229836	SMS	spermine synthase
8117510	0.4454	0.0315	-2.3018	-3.5362	-0.322341	HMGN4	high mobility group nucleosomal binding domain 4
7962579	0.4454	0.0315	-2.30171	-3.5364	-0.244988	AMIGO2	adhesion molecule with Ig like domain 2
7922637	0.4454	0.0316	-2.30112	-3.5374	-0.355794	TOR1AIP2	BRICK1, SCAR/WAVE actin nucleating complex subunit
8116848	0.4454	0.0316	-2.3001	-3.5391	-0.266751	PAK1IP1	PAK1 interacting protein 1
8167625	0.4454	0.0316	-2.29981	-3.5396	-0.242242	CCNB3	cyclin B3
7916910	0.4454	0.0316	-2.29974	-3.5397	-0.345713	LRRC40	leucine rich repeat containing 40
8151401	0.4455	0.0317	-2.29932	-3.5404	-0.399091	UBE2W	ubiquitin conjugating enzyme E2 W (putative)
8108472	0.4455	0.0317	2.29903	-3.5409	0.211614	PURA	purine rich element binding protein A
8103975	0.4458	0.0317	2.29854	-3.5417	0.895512	SLED1	proteoglycan 3 pseudogene
8073259	0.4464	0.0318	2.2974	-3.5436	0.230103	SGSM3	small G protein signaling modulator 3
7915743	0.4464	0.0318	2.29714	-3.5441	0.347473	CCDC17	coiled-coil domain containing 17
7946454	0.4464	0.0318	-2.29688	-3.5445	-0.332949	SCUBE2	signal peptide, CUB domain and EGF like domain containing 2
8135323	0.4464	0.0319	-2.29662	-3.5449	-0.299962	RINT1	RAD50 interactor 1
8042874	0.4464	0.0319	2.29662	-3.5449	0.308371	TTC31	tetratricopeptide repeat domain 31
7934997	0.4464	0.0319	2.29638	-3.5453	0.84359	PPP1R3C	protein phosphatase 1 regulatory subunit 3C
8031669	0.4464	0.0319	-2.2962	-3.5456	-0.386644	ZNF470	zinc finger protein 470
8133215	0.4467	0.0319	2.29569	-3.5465	0.497676	STAG3L4	stromal antigen 3-like 4 (pseudogene)
8074931	0.4467	0.0319	2.29538	-3.547	0.223582	ZNF70	zinc finger protein 70
7962559	0.4471	0.032	-2.29467	-3.5482	-0.243391	SLC38A4	solute carrier family 38 member 4
8088979	0.4473	0.032	-2.294	-3.5494	-0.499391	VGLL3	vestigial like family member 3
7903162	0.4473	0.032	-2.29382	-3.5497	-0.336248	TMEM56	transmembrane protein 56
7922018	0.4473	0.0321	2.29358	-3.5501	0.419697	ILDR2	immunoglobulin like domain containing receptor 2
8073192	0.4473	0.0321	-2.29329	-3.5505	-0.269279	UQCRFS1	ubiquinol-cytochrome c reductase, Rieske iron-sulfur polypeptide 1
8087485	0.4473	0.0321	2.29304	-3.551	0.297097	UBA7	ubiquitin like modifier activating enzyme 7
8001651	0.4473	0.0321	2.29293	-3.5512	0.305039	ZNF319	zinc finger protein 319
8062377	0.4473	0.0321	2.29252	-3.5518	0.253993	SRC	SRC proto-oncogene, non-receptor tyrosine kinase
7900183	0.4473	0.0321	-2.29234	-3.5521	-0.301273	MANEAL	mannosidase endo-alpha like
7901445	0.4473	0.0322	-2.29165	-3.5533	-0.201188	PLA2G12AP1	phospholipase A2 group XIIA pseudogene 1
8158783	0.4473	0.0322	2.29144	-3.5537	0.217023	NUP214	nucleoporin 214
8113577	0.4473	0.0322	2.29132	-3.5539	0.201214	TRIM36	tripartite motif containing 36
8040190	0.4474	0.0322	2.29102	-3.5544	0.487907	GRHL1	grainyhead like transcription factor 1
7928411	0.4473	0.0322	2.29192	-3.5529	0.356586	ZSWIM8	nucleophosmin
8139367	0.4476	0.0323	2.29059	-3.5551	0.472426	NPC1L1	NPC1 like intracellular cholesterol transporter 1
8108822	0.4476	0.0323	2.29039	-3.5554	0.313707	RELL2	RELT like 2
7946087	0.4477	0.0323	2.29007	-3.556	0.55384	OR52H1	olfactory receptor family 52 subfamily H member 1
7901050	0.4483	0.0324	2.28894	-3.5579	0.352244	SNORD38A	small nucleolar RNA, C/D box 38A
8025888	0.4483	0.0324	2.28881	-3.5581	0.271099	SWSAP1	SWIM-type zinc finger 7 associated protein 1
7967358	0.4483	0.0324	2.28881	-3.5581	0.450157	PITPNM2	phosphatidylinositol transfer protein membrane associated 2
7909155	0.4486	0.0324	2.28815	-3.5592	0.255173	AVPR1B	arginine vasopressin receptor 1B
8148917	0.4486	0.0324	2.28796	-3.5595	0.351763	MFSD3	major facilitator superfamily domain containing 3
7899943	0.4489	0.0325	-2.28726	-3.5607	-0.363068	ZMYM1	zinc finger MYM-type containing 1
8096098	0.4497	0.0326	-2.28599	-3.5628	-0.318747	COPS4	COP9 signalosome subunit 4
8064601	0.4497	0.0326	2.28574	-3.5633	0.308954	DDRGK1	DDRGK domain containing 1
8173665	0.4497	0.0326	2.28562	-3.5635	0.209342	MAGEE2	MAGE family member E2
8030972	0.4508	0.0327	2.28408	-3.5661	0.272206	VN1R2	vomeronasal 1 receptor 2
7969703	0.4508	0.0327	-2.28399	-3.5662	-0.299871	IPO5	importin 5
7968658	0.4508	0.0327	-2.28383	-3.5665	-0.382024	EXOSC8	exosome component 8
8036038	0.451	0.0328	2.28337	-3.5672	0.306585	ZNF599	zinc finger protein 599
8070233	0.451	0.0328	2.28294	-3.568	0.236643	CLDN14	claudin 14
7985089	0.451	0.0328	-2.28233	-3.569	-0.283362	RCN2	reticulocalbin 2
8054356	0.451	0.0329	2.28196	-3.5696	0.254578	MFSD9	major facilitator superfamily domain containing 9
8013094	0.451	0.0329	-2.28162	-3.5702	-0.320002	COPS3	COP9 signalosome subunit 3
7933047	0.451	0.0329	-2.28132	-3.5707	-0.369101	CUL2	cullin 2
8121144	0.451	0.0329	-2.28124	-3.5708	-0.524601	MANEA	mannosidase endo-alpha
8036473	0.4512	0.0329	-2.28065	-3.5718	-0.322958	PPP1R14A	protein phosphatase 1 regulatory inhibitor subunit 14A
8153373	0.4512	0.033	-2.28046	-3.5721	-0.232538	CYP11B2	cytochrome P450 family 11 subfamily B member 2
8143772	0.4513	0.033	2.2801	-3.5727	0.210185	RARRES2	retinoic acid receptor responder 2
7979269	0.4513	0.033	-2.27996	-3.573	-0.273717	GCH1	GTP cyclohydrolase 1
8050846	0.4514	0.033	2.27941	-3.5739	0.254986	DTNB	dystrobrevin beta
8134460	0.4514	0.0331	2.27904	-3.5745	0.306731	FLJ30064	uncharacterized LOC644975
8113666	0.4514	0.0331	2.27885	-3.5748	0.409064	SEMA6A	semaphorin 6A
8087433	0.4517	0.0331	2.27792	-3.5764	0.400194	NICN1///AMT	nicolin 1///aminomethyltransferase
8180195	0.4517	0.0332	-2.27744	-3.5772	-0.232596	CFHR1	complement factor H related 1
7914996	0.4517	0.0332	-2.27733	-3.5774	-0.363255	MEAF6	MYST/Esa1 associated factor 6
8021919	0.4517	0.0332	-2.27678	-3.5783	-0.222613	TUBB8	tubulin beta 8 class VIII
8077528	0.4517	0.0332	2.27629	-3.5791	0.330072	SETD5	SET domain containing 5
7966600	0.4517	0.0333	2.27616	-3.5793	0.2942	SLC8B1	solute carrier family 8 member B1
7966259	0.4517	0.0333	-2.27505	-3.5812	-0.328711	GLTP	glycolipid transfer protein
7993898	0.4517	0.0333	2.27502	-3.5813	0.202867	VWA3A	von Willebrand factor A domain containing 3A
8111974	0.4517	0.0334	-2.27397	-3.583	-0.271917	PAIP1	RNA, U1 small nuclear 1///RNA, U1 small nuclear 2///RNA, U1 small nuclear 3///RNA, variant U1 small nuclear 18///RNA, U1 small nuclear 4
8134740	0.4517	0.0334	2.27427	-3.5825	0.258235	LAMTOR4	late endosomal/lysosomal adaptor, MAPK and MTOR activator 4
7925043	0.4517	0.0334	-2.27417	-3.5827	-0.315778	EXOC8///SPRTN	exocyst complex component 8///SprT-like N-terminal domain
8087907	0.4517	0.0334	2.27394	-3.5831	0.2705	SEMA3G	semaphorin 3G
7911854	0.4517	0.0334	2.27391	-3.5831	0.368587	TP73-AS1	TP73 antisense RNA 1
8143270	0.4517	0.0334	-2.27352	-3.5838	-0.200083	ZC3HAV1L	zinc finger CCCH-type containing, antiviral 1 like
8072454	0.4517	0.0334	-2.27349	-3.5838	-0.277468	RNF185	ring finger protein 185
8030525	0.4517	0.0334	2.27343	-3.5839	0.257547	PTOV1	prostate tumor overexpressed 1
7981237	0.4517	0.0335	2.27328	-3.5842	0.249331	LOC100129345	uncharacterized LOC100129345
8018209	0.4517	0.0335	2.27291	-3.5848	0.276063	NAT9	N-acetyltransferase 9 (putative)
7898750	0.4517	0.0335	2.27276	-3.585	0.261556	ZBTB40	zinc finger and BTB domain containing 40
8180362	0.4518	0.0335	2.27202	-3.5863	0.273745	MPRIP	zinc finger protein 678
8140196	0.4518	0.0335	2.27202	-3.5863	0.597302	STAG3L2///STAG3L3///STAG3L1	aquaporin 12B///aquaporin 12A
8031837	0.4518	0.0336	2.27179	-3.5867	0.62198	ZNF587	zinc finger protein 587
8129963	0.4519	0.0336	2.27148	-3.5872	0.504343	ADAT2	adenosine deaminase, tRNA specific 2
8049478	0.4522	0.0337	-2.27045	-3.5889	-0.219181	COPS8	COP9 signalosome subunit 8
8143209	0.4522	0.0337	2.27036	-3.5891	0.226891	SVOPL	SVOP like
8139977	0.4523	0.0337	2.26964	-3.5903	0.615186	STAG3L2///STAG3L3	stromal antigen 3-like 2 (pseudogene)///stromal antigen 3-like 3 (pseudogene)
7922550	0.4523	0.0337	2.26958	-3.5904	0.359344	LOC730102///SEC16B	quinone oxidoreductase-like protein 2 pseudogene///SEC16 homolog B, endoplasmic reticulum export factor
8012466	0.4523	0.0337	2.26939	-3.5907	0.277911	KRBA2	KRAB-A domain containing 2
8160602	0.4529	0.0338	2.2683	-3.5925	0.189894	APTX	aprataxin
8077833	0.4529	0.0338	2.26819	-3.5927	0.387104	SLC6A1	solute carrier family 6 member 1
8153457	0.4529	0.0338	2.26849	-3.5922	0.353748	EEF1D	olfactory receptor family 2 subfamily T member 35///olfactory receptor family 2 subfamily T member 2
7982712	0.4531	0.0339	-2.26759	-3.5937	-0.311352	KNSTRN	kinetochore localized astrin/SPAG5 binding protein
8017019	0.4531	0.0339	2.2675	-3.5939	0.244642	MTMR4	myotubularin related protein 4
7973580	0.4531	0.0339	2.26739	-3.5941	0.665573	FITM1	fat storage inducing transmembrane protein 1
7920687	0.4541	0.034	2.26581	-3.5967	0.296992	GBAP1	glucosylceramidase beta pseudogene 1
7954527	0.4541	0.034	-2.2656	-3.597	-0.356075	ARNTL2	aryl hydrocarbon receptor nuclear translocator like 2
8031646	0.4541	0.034	-2.26548	-3.5972	-0.739158	LOC100288114///ZNF667-AS1	uncharacterized LOC100288114///ZNF667 antisense RNA 1 (head to head)
8017476	0.4541	0.034	2.26513	-3.5978	0.362082	CSH2	chorionic somatomammotropin hormone 2
7954173	0.4541	0.034	-2.26507	-3.5979	-0.281754	STRAP	serine/threonine kinase receptor associated protein
7963988	0.4541	0.0341	2.26476	-3.5985	0.202944	SMARCC2	SWI/SNF related, matrix associated, actin dependent regulator of chromatin subfamily c member 2
8033635	0.4541	0.0341	2.26442	-3.599	0.330584	ADAMTS10	ADAM metallopeptidase with thrombospondin type 1 motif 10
8034890	0.4541	0.0341	2.26423	-3.5993	0.227988	OR7C1	olfactory receptor family 7 subfamily C member 1
8148317	0.4541	0.0341	-2.26372	-3.6002	-1.12471	MYC	v-myc avian myelocytomatosis viral oncogene homolog
8172043	0.4541	0.0341	-2.26361	-3.6004	-0.422154	SRPX	sushi repeat containing protein, X-linked
8019194	0.4541	0.0342	2.2624	-3.6024	0.310534	FAAP100	Fanconi anemia core complex associated protein 100
8012079	0.4541	0.0342	2.26225	-3.6026	0.26296	DVL2	dishevelled segment polarity protein 2
8040578	0.4541	0.0342	-2.2622	-3.6027	-0.233439	CENPO///ADCY3	centromere protein O///adenylate cyclase 3
7966213	0.4541	0.0342	2.2622	-3.6027	0.344351	MMAB	methylmalonic aciduria (cobalamin deficiency) cblB type
7920616	0.4541	0.0342	2.26215	-3.6028	0.319637	DCST2	DC-STAMP domain containing 2
8084912	0.4541	0.0342	2.26228	-3.6026	0.234328	SDHAP2///SDHAP1///SDHA	castor zinc finger 1
8027241	0.4541	0.0343	-2.26192	-3.6032	-0.357186	ZNF253	zinc finger protein 253
8176093	0.4541	0.0343	2.26188	-3.6033	0.205535	LAGE3	L antigen family member 3
8106730	0.4541	0.0343	-2.26182	-3.6034	-0.325498	XRCC4	X-ray repair cross complementing 4
7937314	0.4541	0.0343	2.2617	-3.6036	0.827775	PGGHG	protein-glucosylgalactosylhydroxylysine glucosidase
7960340	0.4541	0.0343	-2.26151	-3.6039	-0.380866	FOXM1	forkhead box M1
8150757	0.4541	0.0343	-2.26127	-3.6043	-0.390534	RB1CC1	RB1 inducible coiled-coil 1
8038458	0.4541	0.0343	2.26079	-3.6051	0.304212	PNKP	polynucleotide kinase 3'-phosphatase
8169931	0.4541	0.0344	2.25989	-3.6066	0.170778	ARHGAP36	Rho GTPase activating protein 36
8075886	0.4541	0.0344	2.25932	-3.6075	0.60506	IL2RB	interleukin 2 receptor subunit beta
8037389	0.4541	0.0345	2.25919	-3.6078	0.2	SMG9	SMG9, nonsense mediated mRNA decay factor
8023246	0.4541	0.0345	-2.25912	-3.6079	-0.360035	C18orf32	chromosome 18 open reading frame 32
7966172	0.4541	0.0345	2.25869	-3.6086	0.249183	SVOP	SV2 related protein
8145365	0.4541	0.0345	2.25844	-3.609	0.328828	DOCK5	dedicator of cytokinesis 5
8127391	0.4541	0.0345	-2.25795	-3.6098	-0.432825	EYS	eyes shut homolog (Drosophila)
8041122	0.4541	0.0345	-2.25791	-3.6099	-0.335966	PPP1CB	protein phosphatase 1 catalytic subunit beta
8162880	0.4542	0.0346	-2.25745	-3.6107	-0.234269	MRPL50	mitochondrial ribosomal protein L50
8061154	0.4548	0.0346	2.25661	-3.6121	0.234068	ZNF133	zinc finger protein 133
8162231	0.4548	0.0347	2.25641	-3.6124	0.238689	SEMA4D	semaphorin 4D
8180382	0.455	0.0347	2.25579	-3.6134	0.453984	KRTAP5-7	keratin associated protein 5-7
8041212	0.455	0.0347	-2.25544	-3.614	-0.246793	LCLAT1	lysocardiolipin acyltransferase 1
8176336	0.455	0.0347	2.25532	-3.6142	0.468149	ASMTL-AS1///ASMTL	ASMTL antisense RNA 1///acetylserotonin O-methyltransferase-like
7982294	0.455	0.0347	2.25524	-3.6144	0.38887	OTUD7A///OTUD7A	sialic acid acetylesterase
7915351	0.4551	0.0348	2.25482	-3.615	0.234797	SLFNL1	schlafen like 1
8111136	0.4551	0.0348	-2.25475	-3.6152	-0.635875	FAM134B	family with sequence similarity 134 member B
8057034	0.4551	0.0348	-2.25445	-3.6157	-0.276871	PRKRA	protein activator of interferon induced protein kinase EIF2AK2
8168045	0.4551	0.0348	2.25383	-3.6167	0.213887	EFNB1	ephrin B1
8055445	0.4551	0.0348	-2.25381	-3.6167	-0.244165	DARS	aspartyl-tRNA synthetase
7981980	0.4551	0.0349	-2.25332	-3.6176	-0.523613	SNORD116-16	small nucleolar RNA, C/D box 116-16
8150099	0.4551	0.0349	-2.25328	-3.6176	-0.249988	MBOAT4	membrane bound O-acyltransferase domain containing 4
8140367	0.4557	0.035	2.25199	-3.6198	0.577541	CCL24	C-C motif chemokine ligand 24
7954591	0.4557	0.035	-2.25189	-3.6199	-0.275405	MRPS35	mitochondrial ribosomal protein S35
8059319	0.4559	0.035	-2.25132	-3.6209	-0.323197	FARSB	phenylalanyl-tRNA synthetase beta subunit
8139873	0.4561	0.0351	2.25045	-3.6223	0.636386	LINC00174	long intergenic non-protein coding RNA 174
8162610	0.4561	0.0351	-2.25043	-3.6224	-0.281328	CDC14B	cell division cycle 14B
7934459	0.4561	0.0351	2.25008	-3.6229	0.219014	NDST2	N-deacetylase and N-sulfotransferase 2
8166098	0.4561	0.0351	-2.25007	-3.623	-0.230253	RAB9A	RAB9A, member RAS oncogene family
7938528	0.4561	0.0351	-2.2496	-3.6238	-0.242141	PARVA	parvin alpha
7989696	0.4561	0.0352	-2.24947	-3.624	-0.264331	SPG21	spastic paraplegia 21 (autosomal recessive, Mast syndrome)
7966621	0.4561	0.0352	-2.24924	-3.6243	-0.951298	SDS	serine dehydratase
7927008	0.4561	0.0352	-2.24884	-3.625	-0.181043	CCNY	cyclin Y
8070876	0.4562	0.0352	2.24852	-3.6256	0.263075	POFUT2	protein O-fucosyltransferase 2
7999769	0.4561	0.0352	2.24884	-3.625	0.557002	PKD1P6-NPIPP1///PKD1P1///PKD1P2///NPIPA1	nurim (nuclear envelope membrane protein)
8150103	0.4567	0.0353	-2.24749	-3.6273	-0.343348	GTF2E2	general transcription factor IIE subunit 2
8110318	0.4567	0.0353	-2.24746	-3.6273	-0.240596	PRELID1	PRELI domain containing 1
8043036	0.4571	0.0354	-2.2468	-3.6284	-0.42992	LOC1720	dihydrofolate reductase pseudogene
8093413	0.4571	0.0354	2.2466	-3.6288	0.313173	TMEM175	transmembrane protein 175
8162388	0.4571	0.0354	-2.24643	-3.629	-0.621466	OMD	osteomodulin
8130013	0.4572	0.0355	-2.24537	-3.6308	-0.2173	EPM2A	epilepsy, progressive myoclonus type 2A, Lafora disease (laforin)
7992529	0.4572	0.0355	2.2453	-3.6309	0.289377	TRAF7///CASKIN1	TNF receptor associated factor 7///CASK interacting protein 1
7951246	0.4572	0.0355	2.24497	-3.6315	0.622106	MMP8	matrix metallopeptidase 8
7927529	0.4572	0.0355	2.24474	-3.6318	0.218199	MSMB	microseminoprotein beta
8156523	0.4572	0.0356	2.244	-3.6331	0.323679	MIRLET7D	microRNA let-7d
8097098	0.4572	0.0356	-2.24381	-3.6334	-0.431597	USP53	ubiquitin specific peptidase 53
7960261	0.4572	0.0356	2.24361	-3.6337	0.257652	RAD52	RAD52 homolog, DNA repair protein
8055323	0.4572	0.0356	2.24333	-3.6342	0.396939	NCKAP5	NCK associated protein 5
8085062	0.4572	0.0356	2.24332	-3.6342	0.217166	IL5RA	interleukin 5 receptor subunit alpha
7990848	0.4572	0.0356	2.24308	-3.6346	0.202967	TMC3	transmembrane channel like 3
8091941	0.4572	0.0356	-2.24303	-3.6347	-0.290314	PDCD10	programmed cell death 10
7928645	0.4572	0.0356	2.24325	-3.6343	0.266368	NUTM2D///NUTM2A	pecanex homolog 3 (Drosophila)
7973948	0.4576	0.0357	-2.24246	-3.6356	-0.313293	BRMS1L	breast cancer metastasis-suppressor 1-like
7906904	0.4576	0.0357	2.24219	-3.6361	0.342147	HSD17B7P2///HSD17B7	hydroxysteroid 17-beta dehydrogenase 7 pseudogene 2///hydroxysteroid 17-beta dehydrogenase 7
7998002	0.4576	0.0357	2.24205	-3.6363	0.28422	ZNF276	zinc finger protein 276
8140840	0.4577	0.0357	-2.2418	-3.6367	-0.53618	STEAP4	STEAP4 metalloreductase
7935027	0.4577	0.0357	-2.24153	-3.6372	-0.253362	IDE	insulin degrading enzyme
7897370	0.4577	0.0358	-2.24101	-3.6381	-0.257748	VAMP3	vesicle associated membrane protein 3
8111698	0.4577	0.0358	-2.24079	-3.6384	-0.383143	RICTOR	RPTOR independent companion of MTOR complex 2
7922051	0.4577	0.0358	-2.2407	-3.6386	-0.313664	CREG1	cellular repressor of E1A stimulated genes 1
7951093	0.4577	0.0358	-2.24029	-3.6393	-0.344737	FAM76B	family with sequence similarity 76 member B
8175360	0.4577	0.0358	-2.24028	-3.6393	-0.425426	MMGT1	membrane magnesium transporter 1
8015031	0.4578	0.0359	2.2399	-3.6399	0.40519	CCR7	C-C motif chemokine receptor 7
7939723	0.4581	0.0359	-2.23933	-3.6408	-0.164175	C11orf49	chromosome 11 open reading frame 49
7951896	0.4583	0.0359	2.23889	-3.6416	0.268158	PCSK7	proprotein convertase subtilisin/kexin type 7
8094165	0.4584	0.036	-2.23808	-3.6429	-0.31438	HSP90AB2P	heat shock protein 90 alpha family class B member 2, pseudogene
8058258	0.4584	0.036	-2.23781	-3.6434	-0.216368	TMEM237	transmembrane protein 237
8106494	0.4584	0.0361	2.2374	-3.644	0.211908	BHMT2	betaine--homocysteine S-methyltransferase 2
7998457	0.4584	0.0361	2.23734	-3.6442	0.305198	UNKL	unkempt family like zinc finger
8156706	0.4584	0.0361	-2.23696	-3.6448	-0.506771	TSTD2///TMOD1	thiosulfate sulfurtransferase like domain containing 2///tropomodulin 1
8035648	0.4584	0.0361	2.23676	-3.6451	0.575593	TM6SF2	transmembrane 6 superfamily member 2
7900352	0.4586	0.0361	2.23627	-3.6459	0.228858	OXCT2P1///OXCT2	3-oxoacid CoA-transferase 2 pseudogene 1///3-oxoacid CoA-transferase 2
7999965	0.4584	0.0361	2.23716	-3.6444	0.254874	ACSM2B	dynamin 1 pseudogene 46
7962884	0.4587	0.0362	-2.23565	-3.647	-0.864047	RND1	Rho family GTPase 1
7937230	0.4587	0.0362	-2.23531	-3.6475	-0.372356	SPRNP1///SYCE1	shadow of prion protein homolog (zebrafish) pseudogene 1///synaptonemal complex central element protein 1
7997179	0.4587	0.0362	2.23522	-3.6477	0.334608	DHODH	dihydroorotate dehydrogenase (quinone)
8031732	0.4587	0.0363	-2.23432	-3.6492	-0.271795	ZNF547///TRAPPC2B///TRAPPC2	zinc finger protein 547///trafficking protein particle complex 2B///trafficking protein particle complex 2
7974816	0.4587	0.0363	-2.23365	-3.6503	-0.391372	SLC38A6	solute carrier family 38 member 6
8080773	0.4587	0.0363	-2.23364	-3.6503	-0.224467	RPP14	ribonuclease P/MRP subunit p14
8180336	0.4587	0.0363	2.23363	-3.6503	0.247746	SLC35E2	solute carrier family 35 member E2
7928752	0.4587	0.0363	-2.23363	-3.6503	-0.229975	GHITM	growth hormone inducible transmembrane protein
7902023	0.4587	0.0364	2.23344	-3.6506	0.30174	RAVER2	ribonucleoprotein, PTB binding 2
8106962	0.4587	0.0364	-2.23343	-3.6506	-0.432071	ARSK	arylsulfatase family member K
7926821	0.4587	0.0364	-2.23318	-3.6511	-0.307418	MASTL	microtubule associated serine/threonine kinase like
7949490	0.4588	0.0364	2.23276	-3.6518	0.263692	AP5B1	adaptor related protein complex 5 beta 1 subunit
7903632	0.4588	0.0364	2.23256	-3.6521	0.268554	CELSR2	cadherin EGF LAG seven-pass G-type receptor 2
8101992	0.4591	0.0365	-2.23154	-3.6538	-0.222059	SLC39A8	solute carrier family 39 member 8
7922420	0.4591	0.0365	-2.2313	-3.6542	-0.145394	SERPINC1	serpin family C member 1
8112709	0.4591	0.0365	-2.23129	-3.6542	-0.233872	POC5	POC5 centriolar protein
8103998	0.4591	0.0365	-2.23102	-3.6546	-0.273128	UFSP2	UFM1 specific peptidase 2
8078286	0.4591	0.0365	-2.23096	-3.6547	-0.322861	RARB	retinoic acid receptor beta
7925687	0.4592	0.0366	2.23012	-3.6561	0.230254	C1orf229	chromosome 1 open reading frame 229
8176986	0.4592	0.0366	2.23057	-3.6554	0.245305	PPP2R3B	DEAD/H (Asp-Glu-Ala-Asp/His) box polypeptide 11-like///DEAD/H-box helicase 12, pseudogene///DEAD/H-box helicase 11///DEAD/H (Asp-Glu-Ala-Asp/His) box polypeptide 11-like///DEAD/H-box helicase 12, pseudogene
8040753	0.4592	0.0367	2.22903	-3.6579	0.25748	TMEM214	transmembrane protein 214
8161755	0.4592	0.0367	-2.22868	-3.6585	-0.247793	ALDH1A1	aldehyde dehydrogenase 1 family member A1
8077450	0.4592	0.0367	-2.22847	-3.6589	-0.251935	ARL8B	ADP ribosylation factor like GTPase 8B
8093112	0.4592	0.0367	-2.2284	-3.659	-0.236181	UBXN7	UBX domain protein 7
7924636	0.4592	0.0368	2.22754	-3.6604	0.378536	TMEM63A	transmembrane protein 63A
8093343	0.4592	0.0368	2.22696	-3.6614	0.189548	PIGG	phosphatidylinositol glycan anchor biosynthesis class G
7965048	0.4592	0.0368	-2.22692	-3.6614	-0.417022	NAP1L1	nucleosome assembly protein 1 like 1
8022666	0.4592	0.0369	-2.22652	-3.6621	-0.71883	CHST9	carbohydrate sulfotransferase 9
8071147	0.4592	0.0369	-2.22591	-3.6631	-0.229385	TUBA8	tubulin alpha 8
8153709	0.4592	0.0369	2.22561	-3.6636	0.300896	TMEM249///FBXL6	transmembrane protein 249///F-box and leucine rich repeat protein 6
8014420	0.4592	0.0369	2.22622	-3.6626	0.58104	TBC1D3I///TBC1D3H///TBC1D3///TBC1D3C///TBC1D3B///TBC1D3F	pyridoxal dependent decarboxylase domain containing 2, pseudogene
8034873	0.4592	0.037	2.22542	-3.6639	0.494532	ADGRE2	adhesion G protein-coupled receptor E2
7948718	0.4592	0.037	2.22492	-3.6648	0.296647	EML3	echinoderm microtubule associated protein like 3
7899018	0.4592	0.037	-2.22473	-3.6651	-0.289065	TMEM57	transmembrane protein 57
8081431	0.4592	0.037	-2.22456	-3.6654	-0.313192	ALCAM	activated leukocyte cell adhesion molecule
8147830	0.4592	0.037	2.22442	-3.6656	0.239805	DCSTAMP	dendrocyte expressed seven transmembrane protein
8168391	0.4592	0.037	2.22511	-3.6644	0.285473	FAM226B	TGFB induced factor homeobox 1
8020955	0.4592	0.0371	2.22408	-3.6661	0.247197	MOCOS	molybdenum cofactor sulfurase
8078270	0.4592	0.0371	-2.22395	-3.6664	-0.207799	RPL15	ribosomal protein L15
7978706	0.4592	0.0371	2.22335	-3.6673	0.277656	FOXA1	forkhead box A1
8093086	0.4592	0.0371	2.22327	-3.6675	0.179316	PCYT1A	phosphate cytidylyltransferase 1, choline, alpha
7901140	0.4592	0.0372	2.22287	-3.6681	0.246896	MAST2	microtubule associated serine/threonine kinase 2
7981895	0.4592	0.0372	2.22269	-3.6684	0.31228	GOLGA8DP///GOLGA8S	golgin A8 family member D, pseudogene///golgin A8 family member S
8023710	0.4592	0.0372	-2.2224	-3.6689	-0.849068	CDH19	cadherin 19
8133192	0.4592	0.0372	-2.22212	-3.6694	-0.154869	TMEM248	transmembrane protein 248
8101013	0.4592	0.0372	-2.22189	-3.6698	-0.359395	RCHY1	ring finger and CHY zinc finger domain containing 1
7956038	0.4592	0.0372	2.22188	-3.6698	0.584101	TMEM198B///MMP19///TMEM198B	transmembrane protein 198B (pseudogene)///matrix metallopeptidase 19///transmembrane protein 198B (pseudogene)
8036969	0.4592	0.0372	2.22167	-3.6701	0.311697	CYP2A13///CYP2A7///CYP2A6	cytochrome P450 family 2 subfamily A member 13///cytochrome P450 family 2 subfamily A member 7///cytochrome P450 family 2 subfamily A member 6
8020647	0.4596	0.0373	-2.22084	-3.6715	-0.210321	TTC39C	ribosomal protein L23a pseudogene 82///ribosomal protein L23a pseudogene 7
7916219	0.4592	0.0373	-2.22145	-3.6705	-0.229913	COA7	cytochrome c oxidase assembly factor 7 (putative)
8025051	0.4601	0.0374	-2.22003	-3.6729	-0.28597	TUBB4A	tubulin beta 4A class IVa
7954997	0.4601	0.0375	-2.21878	-3.6749	-0.245182	ANO6	anoctamin 6
8109576	0.4601	0.0375	-2.2187	-3.675	-0.262877	THG1L	tRNA-histidine guanylyltransferase 1 like
8068363	0.4601	0.0375	2.21846	-3.6754	0.408534	LINC00310	long intergenic non-protein coding RNA 310
7913655	0.4601	0.0375	-2.21833	-3.6757	-0.28865	ID3	inhibitor of DNA binding 3, HLH protein
8067903	0.4601	0.0375	-2.21829	-3.6757	-0.27141	USP25	ubiquitin specific peptidase 25
7973918	0.4601	0.0375	-2.21821	-3.6759	-0.534448	FAM177A1	family with sequence similarity 177 member A1
7982527	0.4601	0.0375	-2.21786	-3.6764	-0.357359	ZNF770	zinc finger protein 770
8012450	0.4602	0.0376	2.21744	-3.6771	0.425043	SLC25A35///RANGRF	solute carrier family 25 member 35///RAN guanine nucleotide release factor
8145652	0.4602	0.0376	-2.21708	-3.6777	-0.284161	LEPROTL1	leptin receptor overlapping transcript-like 1
8126681	0.4607	0.0377	2.21615	-3.6793	0.222533	AARS2	alanyl-tRNA synthetase 2, mitochondrial
8149289	0.4607	0.0377	-2.21566	-3.6801	-0.272782	SOX7	SRY-box 7
8036033	0.4607	0.0377	2.21564	-3.6801	0.630794	SCGB2B2	secretoglobin family 2B member 2
8077238	0.4607	0.0377	2.21624	-3.6791	0.389231	D2HGDH	SEC14 like lipid binding 4
8069790	0.4611	0.0378	2.21497	-3.6812	0.190395	CLDN17	claudin 17
8012166	0.4611	0.0378	2.21472	-3.6816	0.253428	NEURL4	neuralized E3 ubiquitin protein ligase 4
7898556	0.4614	0.0378	2.21403	-3.6828	0.26678	PQLC2	PQ loop repeat containing 2
8122222	0.4614	0.0379	-2.21384	-3.6831	-0.409801	PDE7B	phosphodiesterase 7B
8168359	0.4616	0.0379	2.21341	-3.6838	0.262181	NHSL2	NHS like 2
7986092	0.4618	0.0379	2.2129	-3.6846	0.322148	FURIN	furin, paired basic amino acid cleaving enzyme
7898192	0.4618	0.0379	-2.21286	-3.6847	-0.228693	DNAJC16	DnaJ heat shock protein family (Hsp40) member C16
7901385	0.4625	0.038	-2.212	-3.6861	-0.249054	OSBPL9	oxysterol binding protein like 9
7954388	0.4626	0.038	-2.21171	-3.6866	-0.399628	GOLT1B	golgi transport 1B
8112376	0.4631	0.0381	-2.21064	-3.6884	-0.505312	CENPK	centromere protein K
7911278	0.4635	0.0382	2.20963	-3.69	0.292491	OR2T1	olfactory receptor family 2 subfamily T member 1
8058390	0.4635	0.0382	2.20946	-3.6903	0.385083	RAPH1	Ras association (RalGDS/AF-6) and pleckstrin homology domains 1
7932069	0.4635	0.0382	-2.20935	-3.6905	-0.239568	NUDT5	nudix hydrolase 5
8113413	0.4641	0.0383	-2.20789	-3.6929	-0.326441	NUDT12	nudix hydrolase 12
7968212	0.4641	0.0383	2.20769	-3.6932	0.438637	WASF3	WAS protein family member 3
7915659	0.4641	0.0383	2.20766	-3.6933	0.241772	HECTD3	HECT domain E3 ubiquitin protein ligase 3
8165765	0.4641	0.0383	2.20761	-3.6933	0.450544	ASMTL-AS1	ASMTL antisense RNA 1
8037695	0.4645	0.0384	2.20704	-3.6943	0.18169	SYMPK	symplekin
8086754	0.4645	0.0384	2.20691	-3.6945	0.243354	SCAP	SREBF chaperone
7974447	0.4652	0.0385	-2.20571	-3.6965	-0.396296	SOCS4	suppressor of cytokine signaling 4
8093258	0.4652	0.0385	-2.20545	-3.6969	-0.266399	IQCG	IQ motif containing G
8063857	0.4652	0.0385	2.20542	-3.697	0.233691	MTG2	mitochondrial ribosome associated GTPase 2
7927548	0.4654	0.0386	-2.20496	-3.6977	-0.255511	TIMM23	translocase of inner mitochondrial membrane 23
7970691	0.4659	0.0386	2.20424	-3.6989	0.230652	GPR12	G protein-coupled receptor 12
8163948	0.4665	0.0387	-2.20321	-3.7006	-0.240269	RBM18	RNA binding motif protein 18
7946180	0.4665	0.0387	2.20297	-3.701	0.181281	TRIM3	tripartite motif containing 3
8143733	0.4665	0.0387	2.20286	-3.7012	0.629477	ZNF767P	zinc finger family member 767, pseudogene
8127787	0.4665	0.0388	-2.20237	-3.702	-0.288531	IBTK	inhibitor of Bruton tyrosine kinase
7997272	0.4666	0.0388	-2.20177	-3.703	-0.252923	GABARAPL2	GABA type A receptor associated protein like 2
7951372	0.4666	0.0388	2.20142	-3.7035	0.201472	CASP4	caspase 4
8019716	0.4665	0.0388	2.20246	-3.7018	0.570299	TBC1D3I///TBC1D3G///TBC1D3H///TBC1D3///TBC1D3C///TBC1D3B///TBC1D3F	F-box and leucine rich repeat protein 8///heat shock transcription factor 4
8148949	0.4666	0.0389	-2.20054	-3.705	-0.406206	TMED10P1	transmembrane p24 trafficking protein 10 pseudogene 1
7973158	0.4666	0.039	2.19998	-3.7059	0.340722	ARHGEF40	Rho guanine nucleotide exchange factor 40
8030366	0.4666	0.039	2.19996	-3.7059	0.624952	SNORD35A	small nucleolar RNA, C/D box 35A
8169709	0.4666	0.039	-2.19929	-3.7071	-0.396009	GLRX5	glutaredoxin 5
7981387	0.4666	0.039	2.19919	-3.7072	0.153608	CDC42BPB	CDC42 binding protein kinase beta
8100458	0.4666	0.0391	2.19868	-3.7081	0.193337	PDCL2	phosducin like 2
8095819	0.4666	0.0391	-2.19865	-3.7081	-0.37146	FAM47E	family with sequence similarity 47 member E
7993114	0.4666	0.0391	2.19863	-3.7081	0.22911	METTL22	methyltransferase like 22
7920515	0.4666	0.0391	-2.19837	-3.7086	-0.211112	UBE2Q1	ubiquitin conjugating enzyme E2 Q1
8110166	0.4666	0.0391	-2.19825	-3.7088	-0.338609	HIGD2A	HIG1 hypoxia inducible domain family member 2A
8062395	0.4666	0.0391	2.19778	-3.7095	0.252285	NNAT	neuronatin
7982564	0.4666	0.0392	-2.19682	-3.7111	-0.336395	SPRED1	sprouty related EVH1 domain containing 1
8088348	0.4666	0.0392	-2.19676	-3.7112	-0.288864	DENND6A	DENN domain containing 6A
7984276	0.4666	0.0392	2.19674	-3.7112	0.257719	SLC24A1	solute carrier family 24 member 1
8004184	0.4666	0.0393	2.1959	-3.7126	0.587282	XAF1	XIAP associated factor 1
8008706	0.4666	0.0393	2.19583	-3.7127	0.207743	DYNLL2	dynein light chain LC8-type 2
8046560	0.4666	0.0393	2.19559	-3.7131	0.210841	HOXD3	homeobox D3
7951068	0.4666	0.0393	-2.19514	-3.7139	-0.250678	CWC15	CWC15 spliceosome-associated protein
7969003	0.4666	0.0394	-2.19474	-3.7145	-0.237145	ITM2B	integral membrane protein 2B
7938076	0.4666	0.0394	2.19444	-3.715	0.268917	OR52W1	olfactory receptor family 52 subfamily W member 1
7941382	0.4666	0.0394	-2.19441	-3.7151	-0.175203	KAT5	lysine acetyltransferase 5
8014903	0.4666	0.0394	2.19436	-3.7152	0.761053	GSDMB	gasdermin B
7948312	0.4666	0.0394	2.19433	-3.7152	0.193956	OR1S2	olfactory receptor family 1 subfamily S member 2
8030199	0.4666	0.0394	2.19419	-3.7154	0.407845	SNRNP70	small nuclear ribonucleoprotein U1 subunit 70
8160581	0.4666	0.0395	-2.19388	-3.7159	-0.347011	TOPORS	TOP1 binding arginine/serine rich protein
7973105	0.4666	0.0395	2.19368	-3.7163	0.342887	RNASE3	ribonuclease A family member 3
7905171	0.4666	0.0395	2.19334	-3.7168	0.395465	PRPF3	pre-mRNA processing factor 3
7920317	0.4666	0.0396	-2.19259	-3.7181	-0.241744	ILF2	interleukin enhancer binding factor 2
7991754	0.4666	0.0396	-2.19257	-3.7181	-0.350583	HBZ	hemoglobin subunit zeta
7960131	0.4666	0.0396	-2.19251	-3.7182	-0.188915	RPS11	ribosomal protein S11
8174253	0.4666	0.0396	-2.19246	-3.7183	-0.277024	MORF4L2	mortality factor 4 like 2
7917798	0.4666	0.0396	2.19234	-3.7185	0.208575	ABCA4	ATP binding cassette subfamily A member 4
8175177	0.4666	0.0396	-2.19218	-3.7187	-0.29076	MBNL3	muscleblind like splicing regulator 3
7915091	0.4666	0.0396	-2.19217	-3.7187	-0.21625	MTF1	metal regulatory transcription factor 1
7997909	0.4666	0.0396	2.19213	-3.7188	0.229655	SPG7///SPG7	SPG7, paraplegin matrix AAA peptidase subunit///SPG7, paraplegin matrix AAA peptidase subunit
8002051	0.4666	0.0396	-2.19211	-3.7188	-0.259882	AGRP	agouti related neuropeptide
8145334	0.4666	0.0396	2.19207	-3.7189	0.185894	ADAM7	ADAM metallopeptidase domain 7
7981986	0.4666	0.0396	-2.19155	-3.7198	-0.364123	SNORD116-22///SNORD116-21///SNORD116-20///SNORD116-18///SNORD116-17///SNORD116-16///SNORD116-15///SNORD116-14///SNORD116-19///SNRPN	small nucleolar RNA, C/D box 116-22///small nucleolar RNA, C/D box 116-21///small nucleolar RNA, C/D box 116-20///small nucleolar RNA, C/D box 116-18///small nucleolar RNA, C/D box 116-17///small nucleolar RNA, C/D box 116-16///small nucleolar RNA, C/D box 116-15///small nucleolar RNA, C/D box 116-14///small nucleolar RNA, C/D box 116-19///small nuclear ribonucleoprotein polypeptide N
8147654	0.4666	0.0396	-2.19149	-3.7199	-0.275255	POLR2K	RNA polymerase II subunit K
8015257	0.4666	0.0396	2.19144	-3.7199	0.284404	KRT33A	keratin 33A
8069711	0.4666	0.0397	-2.19139	-3.72	-0.261098	LTN1	listerin E3 ubiquitin protein ligase 1
7963134	0.4666	0.0397	2.19121	-3.7203	0.23568	NCKAP5L	NCK associated protein 5 like
8121043	0.4666	0.0397	-2.19057	-3.7214	-0.27719	ORC3	origin recognition complex subunit 3
7986517	0.4666	0.0397	2.19092	-3.7208	0.763323	DNM1P46	REX1, RNA exonuclease 1 homolog-like 1, pseudogene
8067773	0.4667	0.0398	2.18986	-3.7225	0.347121	ZNF512B	zinc finger protein 512B
7923119	0.4667	0.0398	-2.18951	-3.7231	-0.446662	ZBTB41	zinc finger and BTB domain containing 41
7954503	0.4667	0.0398	-2.18949	-3.7231	-0.244286	MED21	mediator complex subunit 21
8031962	0.4667	0.0398	2.18922	-3.7236	0.206924	ZNF446	zinc finger protein 446
8010017	0.4667	0.0399	2.18884	-3.7242	0.273553	TEN1///CDK3	TEN1 CST complex subunit///cyclin dependent kinase 3
8109505	0.4667	0.0399	-2.18866	-3.7245	-0.219045	PPP1R2P3	protein phosphatase 1 regulatory inhibitor subunit 2 pseudogene 3
7946033	0.4667	0.0399	2.18834	-3.725	1.00711	HBB	hemoglobin subunit beta
7995714	0.4667	0.0399	2.18822	-3.7252	0.221864	SLC6A2	solute carrier family 6 member 2
7992205	0.4667	0.0399	-2.18792	-3.7257	-0.167707	UBE2I	ubiquitin conjugating enzyme E2 I
8013812	0.4667	0.0399	2.18788	-3.7258	0.231059	PHF12	PHD finger protein 12
8168432	0.4667	0.04	-2.18737	-3.7266	-0.320637	RLIM	ribosomal protein L36a
8135922	0.4667	0.04	-2.18751	-3.7264	-0.263247	METTL2B	methyltransferase like 2B
7916843	0.4667	0.04	-2.18736	-3.7266	-0.252553	GNG12	G protein subunit gamma 12
8012043	0.4667	0.04	2.18728	-3.7268	0.276896	ASGR1	asialoglycoprotein receptor 1
7985202	0.4667	0.04	-2.18718	-3.7269	-0.282881	PSMA4	proteasome subunit alpha 4
8099326	0.4667	0.04	-2.18692	-3.7274	-0.352965	SLC2A9	solute carrier family 2 member 9
7928300	0.4667	0.0401	-2.18628	-3.7284	-0.288233	ANAPC16	anaphase promoting complex subunit 16
8013622	0.4667	0.0401	2.18618	-3.7286	0.430066	SGK494	uncharacterized serine/threonine-protein kinase SgK494
7980720	0.4667	0.0401	2.18613	-3.7287	0.34552	TTC7B	tetratricopeptide repeat domain 7B
8141795	0.4667	0.0401	2.18591	-3.729	0.260249	POLR2J3///LOC441259///POLR2J2///POLR2J4	RNA polymerase II subunit J3///PMS1 homolog 2, mismatch repair system component pseudogene///RNA polymerase II subunit J2///RNA polymerase II subunit J4, pseudogene
7909225	0.4667	0.0401	-2.18588	-3.7291	-0.28655	DYRK3	dual specificity tyrosine phosphorylation regulated kinase 3
8002523	0.4667	0.0401	-2.18581	-3.7292	-0.183931	CMTR2	cap methyltransferase 2
7953409	0.467	0.0402	2.18522	-3.7301	0.337289	PTMS	parathymosin
8090988	0.467	0.0402	-2.18517	-3.7302	-0.385369	CEP70	centrosomal protein 70
8163672	0.467	0.0402	2.18496	-3.7306	0.297166	PAPPA-AS1///PAPPA	PAPPA antisense RNA 1///pappalysin 1
8006477	0.4673	0.0402	-2.18432	-3.7316	-0.310855	ZNF830	zinc finger protein 830
7910550	0.4674	0.0403	-2.1838	-3.7325	-0.348675	TSNAX-DISC1///TSNAX	TSNAX-DISC1 readthrough (NMD candidate)///translin associated factor X
8048195	0.4674	0.0403	-2.18346	-3.733	-0.185221	RPL37A	ribosomal protein L37a
8079796	0.4674	0.0403	2.18331	-3.7333	0.301608	RNF123	ring finger protein 123
8163839	0.4674	0.0404	-2.18288	-3.734	-0.207632	C5	complement component 5
7901046	0.4674	0.0404	2.18257	-3.7345	0.481027	SNORD55	small nucleolar RNA, C/D box 55
8115022	0.4674	0.0404	-2.18251	-3.7346	-0.313918	CSNK1A1	casein kinase 1 alpha 1
7941797	0.4674	0.0404	2.182	-3.7354	0.227087	GRK2	G protein-coupled receptor kinase 2
7939946	0.4674	0.0404	2.18176	-3.7358	0.312183	OR5D18	olfactory receptor family 5 subfamily D member 18
7983111	0.4674	0.0405	-2.18166	-3.736	-0.325635	SNAP23	synaptosome associated protein 23
8139356	0.4674	0.0405	2.18163	-3.736	0.168827	NUDCD3	NudC domain containing 3
7920744	0.4674	0.0405	2.18152	-3.7362	0.502345	PKLR	pyruvate kinase, liver and RBC
7939102	0.4674	0.0405	-2.18151	-3.7362	-0.256733	ELP4	elongator acetyltransferase complex subunit 4
8027002	0.4683	0.0406	-2.17937	-3.7397	-0.988586	GDF15	growth differentiation factor 15
8014603	0.4683	0.0406	2.17999	-3.7387	0.562463	TBC1D3H///TBC1D3///TBC1D3C///TBC1D3B///TBC1D3F	ankyrin repeat domain 11
7935180	0.4683	0.0407	-2.17885	-3.7406	-0.196393	PDLIM1	PDZ and LIM domain 1
8170992	0.4683	0.0407	2.1788	-3.7407	0.41146	SNORA56	small nucleolar RNA, H/ACA box 56
8046848	0.4683	0.0407	-2.17867	-3.7409	-0.315131	ZC3H15	zinc finger CCCH-type containing 15
7992271	0.4683	0.0407	2.17864	-3.7409	0.286185	TELO2	telomere maintenance 2
8052526	0.4683	0.0407	-2.17861	-3.741	-0.372579	XPO1	exportin 1
8105191	0.4684	0.0408	-2.17791	-3.7421	-0.303192	PARP8	poly(ADP-ribose) polymerase family member 8
8134789	0.4684	0.0408	2.17782	-3.7423	0.640811	STAG3L5P-PVRIG2P-PILRB///PILRB	STAG3L5P-PVRIG2P-PILRB readthrough///paired immunoglobin-like type 2 receptor beta
7988605	0.4684	0.0408	-2.17776	-3.7424	-0.381942	COPS2	COP9 signalosome subunit 2
7931899	0.4684	0.0409	-2.17688	-3.7438	-0.208761	IL15RA	interleukin 15 receptor subunit alpha
8017688	0.4684	0.0409	2.17685	-3.7438	0.394037	LRRC37A2///LRRC37A3	leucine rich repeat containing 37 member A2///leucine rich repeat containing 37 member A3
8109201	0.4684	0.0409	2.17683	-3.7439	0.227367	HMGXB3	HMG-box containing 3
8153727	0.4684	0.0409	2.17644	-3.7445	0.285745	CPSF1	cleavage and polyadenylation specific factor 1
7942232	0.4684	0.0409	2.17627	-3.7448	0.201597	NADSYN1	NAD synthetase 1
7954613	0.4684	0.0409	-2.17612	-3.745	-0.315745	CCDC91	coiled-coil domain containing 91
8147221	0.469	0.041	-2.17518	-3.7466	-0.34551	OSGIN2	oxidative stress induced growth inhibitor family member 2
8113278	0.469	0.041	2.17503	-3.7468	0.18066	LIX1	limb and CNS expressed 1
7995448	0.469	0.041	-2.17472	-3.7473	-0.298343	CNEP1R1	CTD nuclear envelope phosphatase 1 regulatory subunit 1
8121734	0.469	0.041	-2.17462	-3.7475	-0.393681	ASF1A	anti-silencing function 1A histone chaperone
8118207	0.469	0.0411	2.17456	-3.7476	0.515013	SNORA38	small nucleolar RNA, H/ACA box 38
7972444	0.469	0.0411	-2.1745	-3.7477	-0.276207	STK24	serine/threonine kinase 24
8144658	0.4694	0.0411	2.17367	-3.749	0.241055	NEIL2	nei like DNA glycosylase 2
7987172	0.4694	0.0411	-2.17339	-3.7495	-0.25842	EMC7	ER membrane protein complex subunit 7
8086451	0.4694	0.0412	-2.17266	-3.7507	-0.465691	HIGD1A	WAS protein family homolog 1 pseudogene///WAS protein family homolog 1///uncharacterized LOC100134445///WAS protein family homolog 7 pseudogene///WAS protein family homolog 5 pseudogene///WAS protein family homolog 2 pseudogene///WAS protein family homolog 3 pseudogene
8012753	0.4694	0.0412	2.17321	-3.7498	0.388159	MYH2	myosin heavy chain 2
8113385	0.4694	0.0412	2.17304	-3.7501	0.139719	SLCO6A1	solute carrier organic anion transporter family member 6A1
8091342	0.4694	0.0412	2.17291	-3.7503	0.22497	ZIC4	Zic family member 4
7903010	0.4694	0.0412	-2.1728	-3.7505	-0.183482	FAM69A///SNORA66///RPL5	family with sequence similarity 69 member A///small nucleolar RNA, H/ACA box 66///ribosomal protein L5
7963567	0.4694	0.0412	-2.17238	-3.7511	-0.357962	KRT8	keratin 8
7931204	0.4694	0.0412	2.17233	-3.7512	0.359556	LHPP	phospholysine phosphohistidine inorganic pyrophosphate phosphatase
7916316	0.4694	0.0413	-2.17192	-3.7519	-0.244367	NDC1	NDC1 transmembrane nucleoporin
8036004	0.4694	0.0413	2.17189	-3.7519	0.417736	CEBPA	CCAAT/enhancer binding protein alpha
8005959	0.4696	0.0413	2.17149	-3.7526	0.240379	NEK8	NIMA related kinase 8
8054344	0.4696	0.0413	2.17111	-3.7532	0.208923	RFX8	RFX family member 8, lacking RFX DNA binding domain
7924712	0.4696	0.0414	-2.17089	-3.7536	-0.202576	LIN9	lin-9 DREAM MuvB core complex component
8138741	0.4696	0.0414	-2.17084	-3.7537	-0.23568	HOXA6	homeobox A6
8069633	0.4697	0.0414	-2.1706	-3.7541	-0.238726	ATP5J	ATP synthase, H+ transporting, mitochondrial Fo complex subunit F6
7967624	0.47	0.0414	-2.17008	-3.7549	-0.205923	SLC15A4	solute carrier family 15 member 4
8052149	0.47	0.0415	-2.1696	-3.7557	-0.224317	PSME4	proteasome activator subunit 4
7971134	0.4702	0.0415	2.16923	-3.7563	0.238163	PROSER1	proline and serine rich 1
8013305	0.4702	0.0415	-2.16888	-3.7569	-0.397747	ZNF286B///ZNF286A	zinc finger protein 286B///zinc finger protein 286A
8169984	0.4702	0.0415	-2.16871	-3.7571	-0.498377	HPRT1	hypoxanthine phosphoribosyltransferase 1
8019392	0.4704	0.0416	2.16814	-3.7581	0.853213	FASN	fatty acid synthase
8112107	0.4704	0.0416	-2.16808	-3.7582	-0.342579	PLPP1	phospholipid phosphatase 1
8001211	0.4704	0.0416	-2.1678	-3.7586	-0.206854	ITFG1	integrin alpha FG-GAP repeat containing 1
8044745	0.4704	0.0416	-2.16775	-3.7587	-0.300321	DDX18	DEAD-box helicase 18
8064581	0.4704	0.0416	-2.16759	-3.759	-0.180311	FASTKD5///UBOX5	FAST kinase domains 5///U-box domain containing 5
7985777	0.4704	0.0417	-2.16722	-3.7596	-0.228596	ISG20	interferon stimulated exonuclease gene 20
8051605	0.4704	0.0417	-2.167	-3.7599	-0.337071	HNRNPLL	heterogeneous nuclear ribonucleoprotein L like
8161238	0.4704	0.0417	-2.16685	-3.7602	-0.312131	RAB1C	RAB1C, member RAS oncogene family pseudogene
7945033	0.4704	0.0417	-2.16671	-3.7604	-0.187015	PATE1	prostate and testis expressed 1
8017711	0.4705	0.0418	-2.16628	-3.7611	-0.326013	GNA13	G protein subunit alpha 13
8119503	0.4707	0.0418	-2.16591	-3.7617	-0.174285	TAF8	TATA-box binding protein associated factor 8
8111127	0.471	0.0418	-2.16545	-3.7625	-0.310361	2020-03-11	membrane associated ring-CH-type finger 11
8118669	0.4713	0.0419	-2.16457	-3.7639	-0.248857	KIFC1	dedicator of cytokinesis 6///angiopoietin like 8
8013574	0.4713	0.0419	-2.16438	-3.7642	-0.195671	KRT18P55	keratin 18 pseudogene 55
7973702	0.4713	0.0419	2.16427	-3.7644	0.281773	LTB4R2///LTB4R	leukotriene B4 receptor 2///leukotriene B4 receptor
8173437	0.4721	0.042	2.1633	-3.7659	0.243636	CXorf65	chromosome X open reading frame 65
8035847	0.4721	0.042	-2.16299	-3.7665	-0.533014	ZNF675	zinc finger protein 675
8029969	0.4721	0.042	-2.16295	-3.7665	-0.373739	SEPW1	selenoprotein W, 1
8147877	0.4721	0.0421	2.16262	-3.7671	0.200395	TRHR	thyrotropin releasing hormone receptor
[truncated: 273 more rows]
